# Supplementary material for: Phenotypic Variation and the Impact of Admixture in the Oryza rufipogon Species Complex (ORSC)
Source: Frontiers journal article supplement (doi:10.3389/fpls.2022.787703), 2022-06-13

# The data analysis pipeline for the mixture model

Anthony J. Greenberg

April 11, 2022

```
R version 4.1.2 (2021-11-01)
Platform: x86_64-pc-linux-gnu (64-bit)
Running under: Arch Linux

Matrix products: default
BLAS/LAPACK: /opt/intel/mkl/lib/intel64/libmkl_gf_lp64.so

locale:
 [1] LC_CTYPE=en_US.UTF-8      LC_NUMERIC=C               LC_TIME=en_US.UTF-8
 [4] LC_COLLATE=en_US.UTF-8    LC_MONETARY=en_US.UTF-8    LC_MESSAGES=en_US.UTF-8
 [7] LC_PAPER=en_US.UTF-8      LC_NAME=C                   LC_ADDRESS=C
[10] LC_TELEPHONE=C            LC_MEASUREMENT=en_US.UTF-8 LC_IDENTIFICATION=C

attached base packages:
[1] stats      graphics  grDevices  utils      datasets  methods    base

other attached packages:
 [1] ggspatial_1.1.5           rnaturalearthdata_0.1.0 rnaturalearth_0.1.0
 [4] sf_1.0-5                  dplyr_1.0.7              ggsankey_0.0.99999
 [7] MuGaMix_1.0               showtext_0.9-4           showtextdb_3.0
[10] sysfonts_0.8.5            ggplot2_3.3.5            data.table_1.14.2

loaded via a namespace (and not attached):
 [1] Rcpp_1.0.7                pillar_1.6.4              compiler_4.1.2            class_7.3-19
 [5] tools_4.1.2               lattice_0.20-45           lifecycle_1.0.1          tibble_3.1.6
 [9] gtable_0.3.0              pkgconfig_2.0.3          rlang_0.4.12             DBI_1.1.1
[13] e1071_1.7-9               withr_2.4.2              generics_0.1.1           vctrs_0.3.8
[17] classInt_0.4-3            grid_4.1.2               tidyselect_1.1.1         glue_1.5.0
[21] R6_2.5.1                  fansi_0.5.0              sp_1.4-6                 purrr_0.3.4
[25] magrittr_2.0.1            scales_1.1.1             ellipsis_0.3.2           units_0.7-2
[29] colorspace_2.0-2          utf8_1.2.2               KernSmooth_2.23-20       proxy_0.4-26
[33] munsell_0.5.0             crayon_1.4.2
```

## 1 All traits, IRRI data

This document contains the full data analysis pipeline we used to run multi-trait mixture models and analyze the results.

Read the data and establish constants.

```

> phenoAll    <- fread("./LNmodeIRRI.tsv")
> trtNames    <- fread("./traitNames.tsv")
> trtNames    <- trtNames[!is.na(IRRI) & (binary == 0),
+                    c("binary", "Planteome", "IRRI" )]
> trtNamesNB  <- trtNames[IRRI %in% names(phenoAll)[-1], IRRI]
> trtNamesNB

  [1] "DTHD"      "CUNO"      "FLFLG"     "PNLG"      "PNNB"      "CULT"
  [7] "FLFWD"     "PANBASE"   "UNFILLED"  "2LLT"      "2LWD"      "ANTLT"
 [13] "AWNLT"     "AWNWD"     "CUDI"      "CUHABIT"   "CUHABIT_VEG" "DIST"
 [19] "FERT"      "FLAGATT"   "LEAF"      "LIGLT"     "PAMB"      "PAN2BR"
 [25] "PANEXS"    "PANTYPE"   "SPKLT"     "SPKWD"     "STGLT"     "STLLT"
 [31] "STLWD"     "STYLT"

> d          <- length(trtNamesNB)
> colSubset  <- c("NSFTV_ID", trtNamesNB)
> phenoAll   <- phenoAll[, ..colSubset]
> N          <- phenoAll[, .N]
> d

[1] 32

> N

[1] 222

```

Mahalanobis distance function to rank traits. The output of this function is used to calculate Hotelling's  $T$ , a multivariate version of Student's  $t$  statistic.

```

> mhl <- function(vec, S){
+   vec%*%S%*%matrix(vec, nrow = length(vec), ncol = 1)
+ }

```

Extracting the number of groups with greater than specified effective number of accessions.

```

> eachNZgrp <- function(vbObj, accNum){
+   sum(vbObj$effNm >= accNum)
+ }
> getNZgrp <- function(vbList, minEffNum){
+   sapply(vbList, eachNZgrp, minEffNum)
+ }

```

Set colors for groups and populations.

```

> wPopColors <- c("W1" = "grey60", "W1orI" = "grey65",
+               "W2" = "palegreen3", "W3" = "grey90",
+               "W4" = "olivedrab4", "W5" = "palegreen", "W6" = "grey30",

```

```

+           "W7" = "grey45", "W8" = "palegreen2")
> sppColors  <- c("O. rufipogon" = "grey40", "O. nivara" = "green3",
+               "Oryza spp." = "purple")
> pGrp8Colors <- c("P1" = "grey50", "P2" = "orangered3", "P4" = "mediumseagreen",
+               "P3" = "skyblue4", "P5" = "thistle2", "P6" = "lightcoral",
+               "P7" = "tan", "P8" = "yellow3", "P2/P3" = "orangered3",
+               "O. rufipogon" = "grey40", "O. nivara" = "green3",
+               "Oryza spp." = "purple")
> sativaCols  <- c("ARO" = "purple", "AUS" = "sienna1", "IND" = "yellow",
+               "TRJ" = "royalblue", "TEJ" = "blue")
> pPop3Colors <- c("P1" = "grey50", "P2" = "skyblue4", "P3" = "orangered3")

```

Now run the model at  $P = 4$  with the three subsets of traits (Mahalanobis only, correlation variation only, and the union of the two).

```

> alpha0 <- 1e-3
> nVBreps <- 200
> nReps <- 5
> Ysc <- phenoAll[, lapply(.SD, scale), .SDcols = trtNamesNB]
> names(Ysc) <- trtNamesNB
> if (file.exists("ordIRRI.Rdata")) {
+   load(file = "ordIRRI.Rdata")
+ } else {
+   ordIRRI <- vector("list", 14)
+   for (iGrp in 2:15) {
+     ordIRRI[[iGrp - 1]] <- replicate(nReps,
+                                     MuGaMix::quickFitModel(Ysc, trtNamesNB, iGrp, alpha0, nVBreps),
+                                     simplify = FALSE)
+   }
+   save(ordIRRI, file = "ordIRRI.Rdata")
+ }

```

Plot number of estimated groups.

```

> gt2GrpDT <- data.table(fullGrp = c(sapply(ordIRRI, getNZgrp, 2)),
+               nGrps = rep(2:15, each = nReps))
> pdfFlNam <- "gt2GrpIRRI.pdf"
> showtext_auto()
> ggplot(data = gt2GrpDT, aes(x = nGrps, y = fullGrp)) +
+   geom_point() +
+   theme_classic(base_size = 18, base_family = "myriad") +
+   xlab("Number of groups") + ylab("Number with > 2 lines")
> ggsave(pdfFlNam, width = 5, height = 5, units = "in",
+   device = "pdf", useDingbats = FALSE)
> cat("\\\\includegraphics{" , pdfFlNam, "}" , sep = "")

```

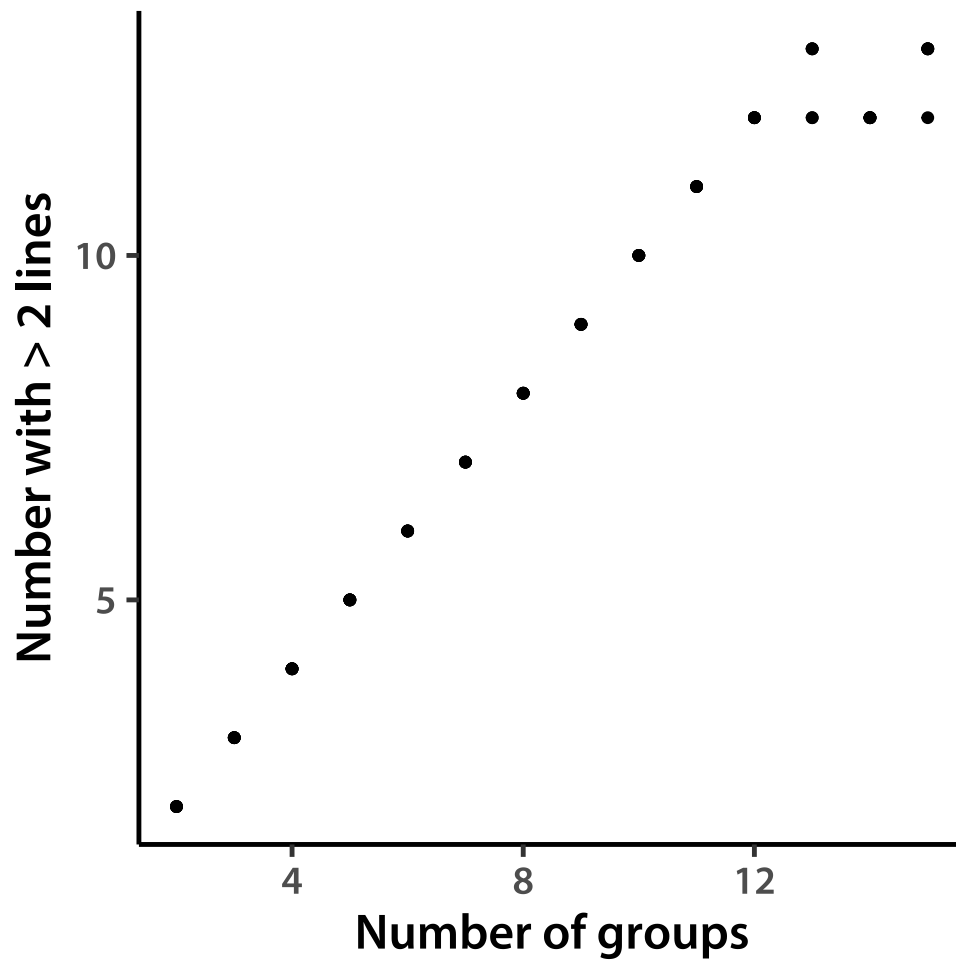

Extract DIC values.

```
> eachDIC <- function(vbObj){  
+   vbObj$DIC  
+ }  
> getDIC <- function(vbList){  
+   sapply(vbList, eachDIC)  
+ }  
> dicVec <- c(sapply(ordIRRI, getDIC))  
> dicDT <- data.table(DIC = dicVec, nGrps = rep(2:15, each = nReps))
```

Plot the DIC distributions.

```
> pdfFlNam <- "dicIRRI.pdf"  
> showtext_auto()  
> ggplot(data = dicDT, aes(x = nGrps, y = DIC)) +  
+   geom_point() +  
+   geom_smooth() +
```

```

+   theme_classic(base_size=18, base_family="myriad") +
+   xlab("Number of groups")
> ggsave(pdfFlNam, width=6, height=5, units="in", device="pdf", useDingbats=FALSE)
> cat("\\includegraphics{" , pdfFlNam, "}\\n\\n", sep="")

```

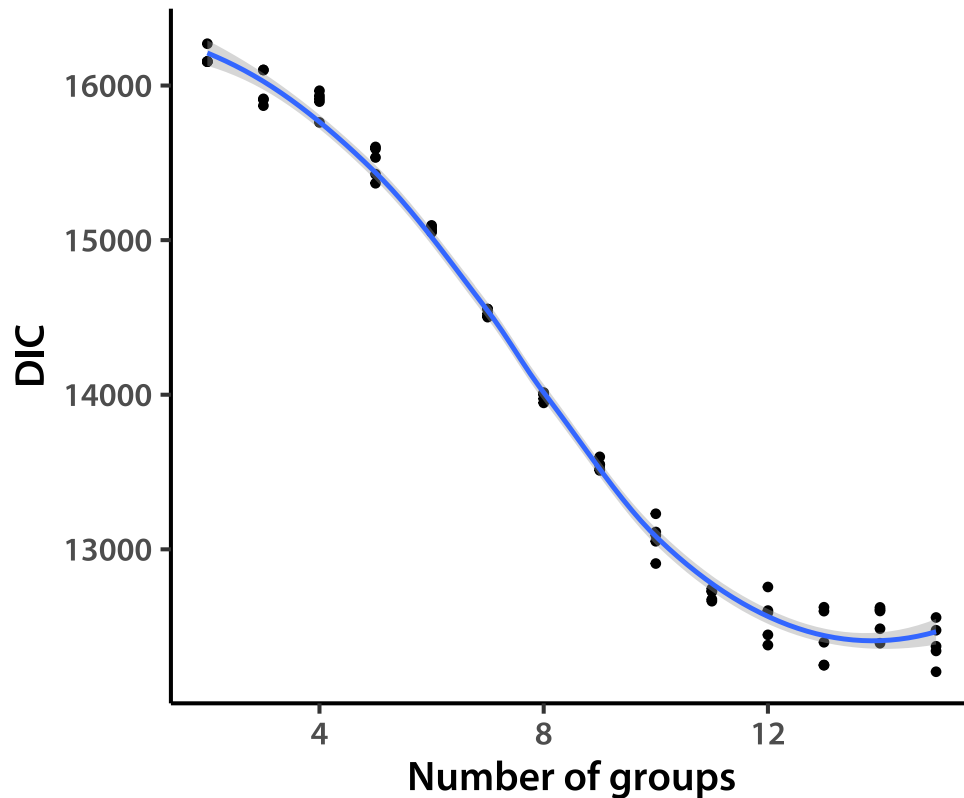

Average  $p$ -values from the replicate runs.

```

> jacDist <- function(vec1, vec2, ctVal){
+   v1 <- vec1 >= ctVal
+   v2 <- vec2 >= ctVal
+   res <- sum(v1 & v2)/sum(v1 | v2)
+   if (is.nan(res)) {
+     return(0.0)
+   } else {
+     return(res)
+   }
+ }
> bestCorCol <- function(mat2, vec, ctVal){
+   apply(mat2, 2, jacDist, vec, ctVal)
+ }
> bestColLst <- function(ind, pList, indList, vec, ctVal){
+   bestCorCol(pList[[ind]]$p[, indList[[ind]]], vec, ctVal)
+ }

```

```

+ }
> addCol <- function(repInd, grpInd, Ngrp){
+   pMat[, grpInd] <- (pMat[, grpInd] +
+     ordIRRip4[[repInd + 1]]$p[,
+       indList[[repInd]][bestInd[repInd]]])
+   indList[[repInd]] <- indList[[repInd]][-bestInd[repInd]]
+   return(NULL)
+ }
> normalizeP <- function(pVec){
+   pVec/sum(pVec)
+ }
> renameGroups <- function(vec){
+   c("P1", "P2", "P4")[which.max(vec)]
+ }
> renameGroups23 <- function(vec){
+   c("P1", "P2/P3", "P4")[which.max(vec)]
+ }

```

Re-run the  $N_G = 4$  model and average among runs.

```

> nReps <- 15
> Ngrp <- 4
> if (file.exists("ordIRRIP4.Rdata")) {
+   load(file = "ordIRRIP4.Rdata")
+ } else {
+   ordIRRip4 <- replicate(nReps,
+     MuGaMix::quickFitModel(Ysc, trtNamesNB, Ngrp, alpha0, nVBreps),
+     simplify = FALSE)
+   save(ordIRRip4, file = "ordIRRIP4.Rdata")
+ }

```

Plot raw grouping relationships.

```

> rawGrp <- data.table(run1 = paste0("P", apply(ordIRRip4[[1]]$p,
+   1, which.max)),
+   run2 = paste0("P", apply(ordIRRip4[[2]]$p,
+   1, which.max)),
+   run3 = paste0("P", apply(ordIRRip4[[3]]$p,
+   1, which.max)),
+   run4 = paste0("P", apply(ordIRRip4[[4]]$p,
+   1, which.max)),
+   run5 = paste0("P", apply(ordIRRip4[[5]]$p,
+   1, which.max)))
> pGrpSan <- as.data.table(ggsankey::make_long(rawGrp, run1, run2,
+   run3, run4, run5))

```

Plot.

```

> pdfFlNam <- "sankeyPGrp4IRRIraw.pdf"
> showtext_auto()
> ggplot(data = pGrpSan, aes(x = x, next_x = next_x, node = node, next_node = next_node,
+                             fill = node, label = node)) +
+   geom_sankey(flow.alpha = 0.6, node.color = "grey30") +
+   geom_sankey_label(size = 5, color = "grey20", fill = "grey90", alpha = 0.8) +
+   scale_fill_manual(values = pGrp8Colors) +
+   theme_sankey(base_size = 20, base_family = "myriad") +
+   theme(strip.background = element_rect(fill = "grey95", linetype = "blank"),
+         legend.position = "none")
> ggsave(pdfFlNam, width = 8, height = 6, units = "in",
+       device = "pdf", useDingbats = FALSE)
> cat("\\includegraphics[width=0.9\\textwidth]{", pdfFlNam, "}\n\n", sep = "")

```

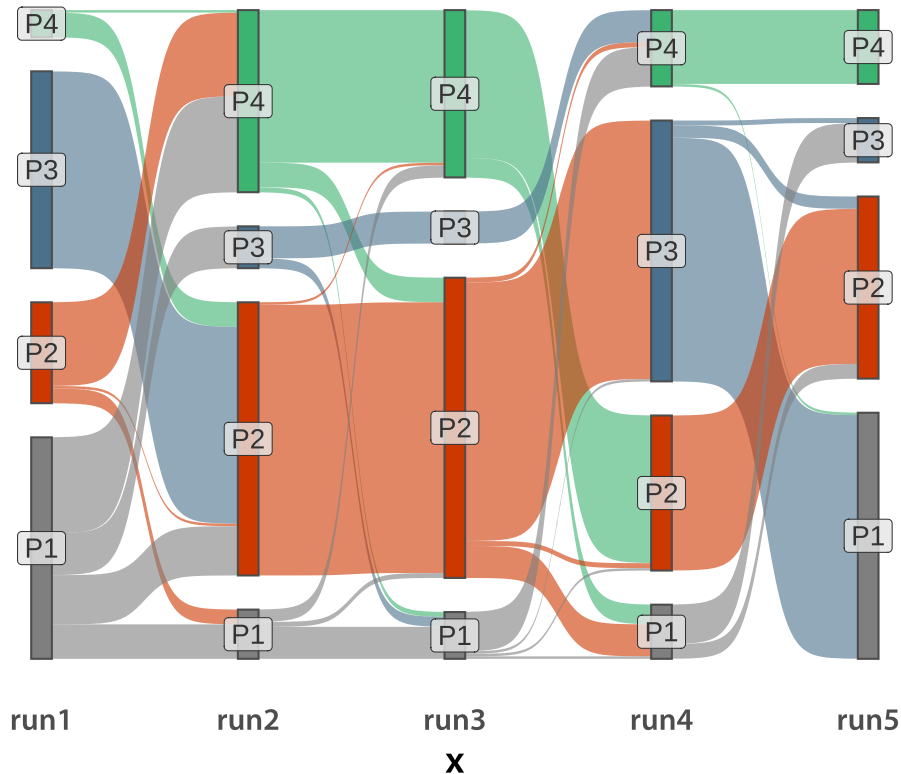

Add the  $N_G = 4$  runs together and re-arrange group labels as close as possible to the old ones.

```

> newGrp    <- fread("./IRRIgroups.tsv")
> rfmix     <- fread("./Q_val_sum_RFMIX.tsv")
> ordIRRIp4 <- c(ordIRRI[[3]], ordIRRIp4)
> pMat      <- ordIRRIp4[[1]]$p[, c(1, 2, 4, 3)]
> nReps     <- 20
> indList    <- lapply(2:nReps, function(i){1:Ngrp})

```

```

> # P1
> simList    <- lapply(1:(nReps - 1), bestColLst,
+                      ordIRRIp4[-1], indList, pMat[, 1], 0.9)
> bestInd    <- unlist(lapply(simList, which.max))
> trash      <- sapply(1:(nReps - 1), addCol, 1, Ngrp)
> # P4
> simList    <- lapply(1:(nReps - 1), bestColLst,
+                      ordIRRIp4[-1], indList, pMat[, 4], 0.9)
> bestInd    <- unlist(lapply(simList, which.max))
> trash      <- sapply(1:(nReps - 1), addCol, 4, Ngrp)
> # P2
> simList    <- lapply(1:(nReps - 1), bestColLst,
+                      ordIRRIp4[-1], indList, pMat[, 2], 0.9)
> bestInd    <- unlist(lapply(simList, which.max))
> trash      <- sapply(1:(nReps - 1), addCol, 2, Ngrp)
> # P3
> bestInd    <- rep(1, nReps - 1)
> trash      <- sapply(1:(nReps - 1), addCol, 3, Ngrp)
> pMat       <- t(apply(pMat, 1, normalizeP))
> pMat3      <- cbind(pMat[, 1], rowSums(pMat[, 2:3]), pMat[, 4])
> fwrite(pMat3, file = "ordIRRIp4.tsv", sep = "\t",
+        col.names = FALSE)
> p4Vec      <- apply(pMat3, 1, renameGroups)
> p23Vec     <- apply(pMat3, 1, renameGroups23)
> newGrp     <- newGrp[, newGrp4 := p4Vec]
> newGrp     <- newGrp[, newGrp23 := p23Vec]
> newGrp     <- newGrp[, grp4p := apply(pMat3, 1, max)]

```

I next plot the probability of belonging to a group for each accession (similar to a STRUCTURE plot).

```

> pvDT       <- as.data.table(round(pMat, 3))
> pMatIRRI4  <- round(pMat, 3)
> setnames(pvDT, paste0("P", 1:Ngrp))
> pvDT <- pvDT[, accession := newGrp[, NSFTV_ID]]

```

I set up two order variables, one reflecting phenotypic group IDs and probabilities, and another reflecting *O. sativa* introgression within phenotypic groups.

```

> pvDT <- pvDT[, orderVar1 := apply(round(pMat, 3), 1, which.max)]
> pvDT <- pvDT[, maxP := round(apply(pMat, 1, max), 3)]
> pvDT <- pvDT[, orderVar1 := ifelse((orderVar1 == 1) & (maxP >= 0.35),
+                                   orderVar1 + 1 - maxP, orderVar1)]
> pvDT <- pvDT[, orderVar1 := ifelse((orderVar1 == 4) & (maxP >= 0.35),
+                                   orderVar1 + maxP, orderVar1)]
> pvDT <- pvDT[, orderVar1 := ifelse((orderVar1 == 2) & (maxP >= 0.5),
+                                   orderVar1 + 1 - maxP, orderVar1)]
> pvDT

```



|      | P1   | P2   | P3   | P4   | accession | orderVar1 | maxP |
|------|------|------|------|------|-----------|-----------|------|
| 1:   | 0.00 | 0.05 | 0.00 | 0.95 | NID401    | 4.95      | 0.95 |
| 2:   | 0.05 | 0.90 | 0.05 | 0.00 | NID402    | 2.10      | 0.90 |
| 3:   | 1.00 | 0.00 | 0.00 | 0.00 | NID403    | 1.00      | 1.00 |
| 4:   | 0.20 | 0.60 | 0.05 | 0.15 | NID404    | 2.40      | 0.60 |
| 5:   | 0.00 | 0.00 | 0.00 | 1.00 | NID405    | 5.00      | 1.00 |
| ---  |      |      |      |      |           |           |      |
| 218: | 1.00 | 0.00 | 0.00 | 0.00 | NID755    | 1.00      | 1.00 |
| 219: | 0.00 | 0.05 | 0.00 | 0.95 | NID757    | 4.95      | 0.95 |
| 220: | 1.00 | 0.00 | 0.00 | 0.00 | NID759    | 1.00      | 1.00 |
| 221: | 0.00 | 0.00 | 0.00 | 1.00 | NID760    | 5.00      | 1.00 |
| 222: | 0.00 | 0.05 | 0.00 | 0.95 | NID762    | 4.95      | 0.95 |

```
> oSat <- rfmix[NSFTV_ID %in% pvDT[, accession], .(NSFTV_ID, O_sativa)]
```

Accessions that were used for training and therefore absent from rfmix results.

```
> oSat <- rbind(oSat,
+ data.table(
+ NSFTV_ID = newGrp[!(NSFTV_ID %in% oSat[, NSFTV_ID]), NSFTV_ID],
+ O_sativa = 0))
> oSat <- oSat[, NSFTV_ID := factor(NSFTV_ID, levels = unique(pvDT[, accession]))]
> names(oSat) <- c("accession", "O_sativa")
> oSat
```

|      | accession | O_sativa |
|------|-----------|----------|
| 1:   | NID405    | 0.19     |
| 2:   | NID413    | 0.02     |
| 3:   | NID446    | 0.02     |
| 4:   | NID449    | 0.01     |
| 5:   | NID450    | 0.01     |
| ---  |           |          |
| 218: | NID720    | 0.00     |
| 219: | NID725    | 0.00     |
| 220: | NID737    | 0.00     |
| 221: | NID738    | 0.00     |
| 222: | NID743    | 0.00     |

```
> pvDT <- pvDT[oSat, on = "accession"]
> pvDT <- pvDT[, orderVar2 := ifelse(orderVar1 >= 4, 1 - O_sativa, O_sativa)]
> pvDT <- setorderv(pvDT, c("orderVar1", "orderVar2"), c(1, 1))
> pvDT <- melt(pvDT, measure = paste0("P", 1:4),
+ variable.name = "group", value.name = "p")
> pvDT <- pvDT[, accession := factor(accession, levels = unique(accession))]
```

Plot.

```

> pdfFlNam <- "structIRRIP4.pdf"
> showtext_auto()
> ggplot(data = pvDT, aes(x = accession, y = p, fill = group)) +
+   geom_col() +
+   scale_fill_manual(values = pGrp8Colors[c(1, 2, 4, 3)]) +
+   geom_rug(aes(x = accession, alpha = O_sativa), sides = "b") +
+   theme_classic(base_size = 18, base_family = "myriad") +
+   guides(alpha = guide_legend(expression(italic("O. sativa")))) +
+   theme(axis.line = element_blank(), axis.text.x = element_blank(),
+         axis.ticks.x = element_blank())
> ggsave(pdfFlNam, width = 8, height = 6, units = "in",
+       device = "pdf", useDingbats = FALSE)
> cat("\\includegraphics[width = 0.95\\textwidth]{", pdfFlNam, "}\\n\\n", sep = "")

```

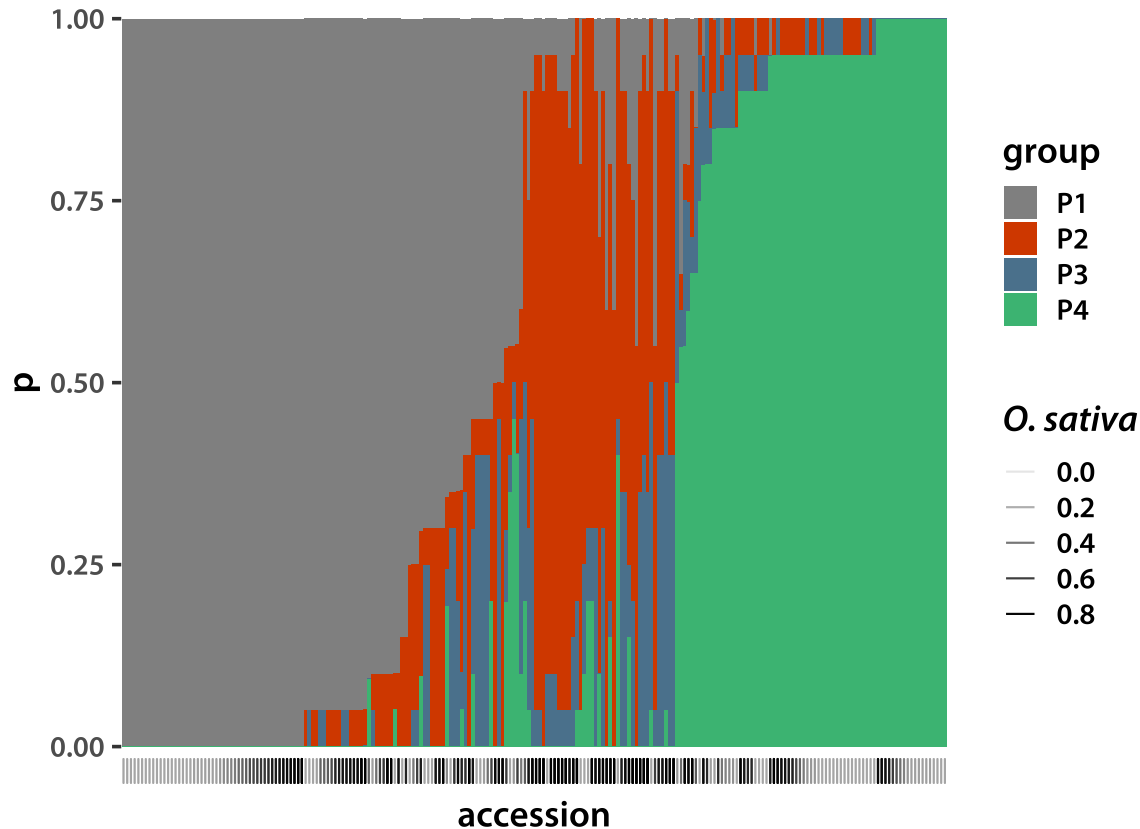

Now average the  $N_G = 3$  runs the same as  $N_G = 4$ .

```

> nReps <- 15
> Ngrp <- 3
> if (file.exists("ordIRRIP3.Rdata")) {
+   load(file = "ordIRRIP3.Rdata")

```

```

+ } else {
+   ordIRRIp3 <- replicate(nReps,
+     MuGaMix::quickFitModel(Ysc, trtNamesNB, Ngrp, alpha0, nVBreps),
+     simplify = FALSE)
+   save(ordIRRIp3, file = "ordIRRIp3.Rdata")
+ }
> addCol <- function(repInd, grpInd, Ngrp){
+   pMat[, grpInd] <- (pMat[, grpInd] +
+     ordIRRIp3[[repInd + 1]]$p[,
+       indList[[repInd]][bestInd[repInd]]])
+   indList[[repInd]] <- indList[[repInd]][-bestInd[repInd]]
+   return(NULL)
+ }
> nReps      <- 20
> pMat       <- ordIRRI[[2]][[2]]$p[, c(2, 1, 3)]
> ordIRRIp3  <- c(ordIRRI[[2]], ordIRRIp3)
> indList    <- lapply(2:nReps, function(i){1:Ngrp})
> # P1
> simList    <- lapply(1:(nReps - 1), bestColLst,
+   ordIRRIp3[-2], indList, pMat[, 1], 0.9)
> bestInd    <- unlist(lapply(simList, which.max))
> trash      <- sapply(1:(nReps - 1), addCol, 1, Ngrp)
> colSums(pMat)

[1] 2983.36232  12.00000  95.03062

> # P2
> simList    <- lapply(1:(nReps - 1), bestColLst,
+   ordIRRIp3[-2], indList, pMat[, 3], 0.9)
> bestInd    <- unlist(lapply(simList, which.max))
> trash      <- sapply(1:(nReps - 1), addCol, 2, Ngrp)
> colSums(pMat)

[1] 2983.36232  990.63831  95.03062

> # P3
> bestInd    <- rep(1, nReps - 1)
> trash      <- sapply(1:(nReps - 1), addCol, 3, Ngrp)
> pMat       <- t(apply(pMat, 1, normalizeP))
> fwrite(pMat, file = "ordIRRIp3.tsv", sep = "\t",
+   col.names = FALSE)
> newGrp     <- newGrp[, newGrp3 := paste0("P", apply(pMat, 1, which.max))]
> newGrp     <- newGrp[, grp3p := apply(pMat, 1, max)]
> p3Grp      <- newGrp[, .(newGrp3)]

```

```
> p3Grp    <- p3Grp[, newGrp3s1 := paste0("P", apply(ordIRRIp3[[1]]$p, 1, which.max))]
> p3Grp    <- p3Grp[, newGrp3s2 := paste0("P",
+                                     apply(ordIRRIp3[[2]]$p[, c(2, 1, 3)], 1, which.max))]
> p3Grp    <- p3Grp[, newGrp3s3 := paste0("P",
+                                     apply(ordIRRIp3[[3]]$p[, c(3, 1, 2)], 1, which.max))]
```

Add  $N_G = 6$  and 8.

```
> lapply(ordIRRI[[5]], function(lst){lst$DIC})
```

```
[[1]]
[1] 15095.33
```

```
[[2]]
[1] 15058.01
```

```
[[3]]
[1] 15085.32
```

```
[[4]]
[1] 15050.4
```

```
[[5]]
[1] 15069.35
```

```
> lapply(ordIRRI[[7]], function(lst){lst$DIC})
```

```
[[1]]
[1] 14013.75
```

```
[[2]]
[1] 13973.85
```

```
[[3]]
[1] 13947.35
```

```
[[4]]
[1] 14004.1
```

```
[[5]]
[1] 14000.3
```

```
> newGrp <- newGrp[, newGrp6 := factor(paste0("P",
+                                     apply(ordIRRI[[5]][[4]]$p[, c(1, 3, 6, 4, 2, 5)],
+                                     1, which.max)), levels = paste0("P", 6:1))]
> newGrp <- newGrp[, newGrp8 := factor(paste0("P",
+                                     apply(ordIRRI[[7]][[3]]$p[, c(5, 1, 7, 3, 6, 8, 4, 2)],
+                                     1, which.max)), levels = paste0("P", 8:1))]
> newGrp <- newGrp[, newGrp3 := factor(newGrp3, levels = paste0("P", 3:1))]
> newGrp <- newGrp[, newGrp4 := factor(newGrp4, levels = paste0("P", 4:1))]
```

We received updated IRRI gene bank data listing species designations. Read the new designations from a file and relate to the accession information we already have.

```
> grinSsp <- fread("./GRINsppNames.tsv")
> newGrp <- newGrp[grinSsp[, .(NSFTV_ID, new_Oryza_spp)], on = "NSFTV_ID", nomatch = 0]
> newGrp <- newGrp[, sspFixed := factor(sspFixed,
+                                     levels = c("nivara", "spontanea", "rufipogon"))]
> levels(newGrp$sspFixed) <- c("0. nivara", "Oryza spp.", "0. rufipogon")
```

Compare the old and the new GRIN species designations.

```
> sppSan <- as.data.table(ggsankey::make_long(newGrp, sspFixed, new_Oryza_spp))
> sppSan <- sppSan[, node := factor(node,
+                                 levels = c("0. nivara", "Oryza spp.", "0. rufipogon"))]
> sppSan <- sppSan[, next_node := factor(next_node,
+                                       levels = c("0. nivara", "Oryza spp.", "0. rufipogon"))]
```

Plot.

```
> pdfFlNam <- "sankeyGRINsppCompare.pdf"
> showtext_auto()
> ggplot(data = sppSan, aes(x = x, next_x = next_x, node = node, next_node = next_node,
+                           fill = node, label = node)) +
+   geom_sankey(flow.alpha = 0.6, node.color = "grey30") +
+   geom_sankey_label(size = 5, color = "grey20", fill = "grey90", alpha = 0.8) +
+   scale_fill_manual(values = sppColors) +
+   scale_x_discrete(labels = c("old species", "GRIN species")) +
+   theme_sankey(base_size = 20, base_family = "myriad") +
+   theme(strip.background = element_rect(fill = "grey95", linetype = "blank"),
+         legend.position = "none") +
+   labs(x = "designation")
> ggsave(pdfFlNam, width = 8, height = 6, units = "in",
+        device = "pdf", useDingbats = FALSE)
> cat("\\\\includegraphics[width=0.9\\textwidth]{", pdfFlNam, "}\n\n", sep = "")
```

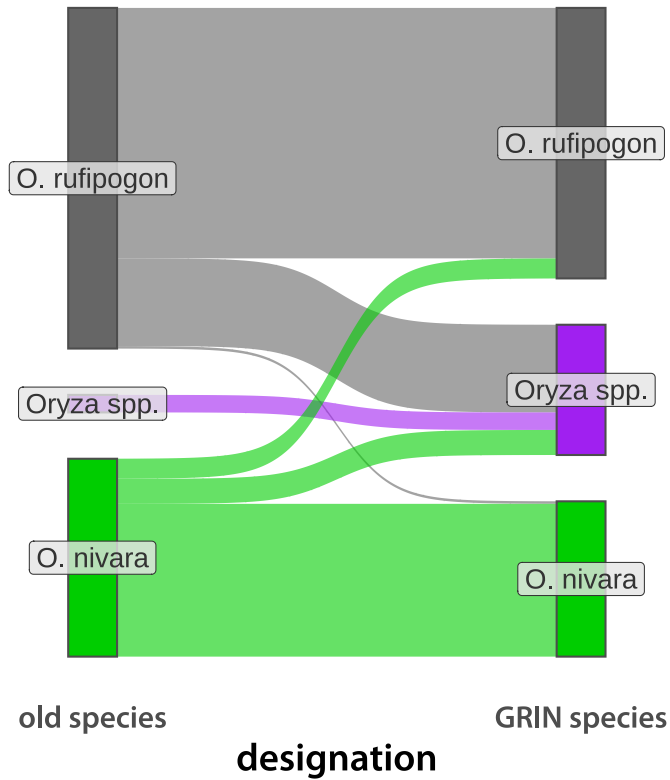

```
> newGrp[(sspFixed == "O. nivara") & (new_Oryza_spp == "O. rufipogon"), ]
```

|    | NSFTV_ID | genPop | probability | Species   | genPopOr | sspFixed  | genPopK8 | newGrp4 | newGrp23 |
|----|----------|--------|-------------|-----------|----------|-----------|----------|---------|----------|
| 1: | NID463   | W2     | 0.8833      | rufipogon | W2       | O. nivara | W2       | P4      | P4       |
| 2: | NID482   | W2     | 1.0000      | rufipogon | W2       | O. nivara | W2       | P4      | P4       |
| 3: | NID491   | W2     | 1.0000      | rufipogon | W2       | O. nivara | W2       | P4      | P4       |
| 4: | NID492   | W2     | 1.0000      | rufipogon | W2       | O. nivara | W2       | P4      | P4       |
| 5: | NID556   | W4     | 1.0000      | rufipogon | W4       | O. nivara | W8       | P4      | P4       |
| 6: | NID558   | W4     | 1.0000      | rufipogon | W4       | O. nivara | W4       | P4      | P4       |
| 7: | NID666   | W2     | 1.0000      | rufipogon | W2       | O. nivara | W2       | P4      | P4       |
| 8: | NID735   | W4     | 0.9668      | rufipogon | W4       | O. nivara | W8       | P4      | P4       |

  

|    | grp4p     | newGrp3 | grp3p     | newGrp6 | newGrp8 | new_Oryza_spp |
|----|-----------|---------|-----------|---------|---------|---------------|
| 1: | 0.9500000 | P1      | 0.6000000 | P4      | P4      | O. rufipogon  |
| 2: | 0.8499068 | P1      | 0.5004958 | P4      | P4      | O. rufipogon  |
| 3: | 0.8500000 | P1      | 0.5500001 | P4      | P6      | O. rufipogon  |
| 4: | 0.8499998 | P1      | 0.5500010 | P4      | P5      | O. rufipogon  |
| 5: | 0.9500000 | P1      | 0.5500000 | P4      | P4      | O. rufipogon  |
| 6: | 1.0000000 | P1      | 0.5500000 | P4      | P4      | O. rufipogon  |
| 7: | 0.9500000 | P1      | 0.5500000 | P4      | P4      | O. rufipogon  |
| 8: | 0.9500000 | P2      | 0.4997681 | P4      | P4      | O. rufipogon  |

```
> newGrp[(sspFixed == "O. rufipogon") & (new_Oryza_spp == "O. nivara"), ]
```

|    | NSFTV_ID  | genPop        | probability           | Species   | genPopOr | sspFixed      | genPopK8 | newGrp4 | newGrp23 |
|----|-----------|---------------|-----------------------|-----------|----------|---------------|----------|---------|----------|
| 1: | NID715    | W4            | 0.5611                | rufipogon | W4       | 0. rufipogon  | W8       | P4      | P4       |
|    |           | grp4p newGrp3 | grp3p newGrp6 newGrp8 |           |          | new_Oryza_spp |          |         |          |
| 1: | 0.7992102 | P1            | 0.7501212             | P3        | P5       | 0. nivara     |          |         |          |

There are eight accessions that are clearly misidentified in GRIN as *O. rufipogon* when both Kim *et al.* genotypic and our phenotypic groups confidently assign them to *O. nivara*. On the other hand, the single GRIN *O. nivara* that is listed as *O. rufipogon* in our data set is correct in GRIN. Fix the designations accordingly.

```
> newGrp <- newGrp[, GRIN_spp :=
+   ifelse((sspFixed == "0. nivara") & (new_Oryza_spp == "0. rufipogon"),
+   "0. nivara", new_Oryza_spp)]
> newGrp[(sspFixed == "0. nivara") & (new_Oryza_spp == "0. rufipogon"), ]
```

|    | NSFTV_ID  | genPop        | probability           | Species   | genPopOr | sspFixed      | genPopK8  | newGrp4 | newGrp23 |
|----|-----------|---------------|-----------------------|-----------|----------|---------------|-----------|---------|----------|
| 1: | NID463    | W2            | 0.8833                | rufipogon | W2       | 0. nivara     | W2        | P4      | P4       |
| 2: | NID482    | W2            | 1.0000                | rufipogon | W2       | 0. nivara     | W2        | P4      | P4       |
| 3: | NID491    | W2            | 1.0000                | rufipogon | W2       | 0. nivara     | W2        | P4      | P4       |
| 4: | NID492    | W2            | 1.0000                | rufipogon | W2       | 0. nivara     | W2        | P4      | P4       |
| 5: | NID556    | W4            | 1.0000                | rufipogon | W4       | 0. nivara     | W8        | P4      | P4       |
| 6: | NID558    | W4            | 1.0000                | rufipogon | W4       | 0. nivara     | W4        | P4      | P4       |
| 7: | NID666    | W2            | 1.0000                | rufipogon | W2       | 0. nivara     | W2        | P4      | P4       |
| 8: | NID735    | W4            | 0.9668                | rufipogon | W4       | 0. nivara     | W8        | P4      | P4       |
|    |           | grp4p newGrp3 | grp3p newGrp6 newGrp8 |           |          | new_Oryza_spp |           |         |          |
| 1: | 0.9500000 | P1            | 0.6000000             | P4        | P4       | 0. rufipogon  | 0. nivara |         |          |
| 2: | 0.8499068 | P1            | 0.5004958             | P4        | P4       | 0. rufipogon  | 0. nivara |         |          |
| 3: | 0.8500000 | P1            | 0.5500001             | P4        | P6       | 0. rufipogon  | 0. nivara |         |          |
| 4: | 0.8499998 | P1            | 0.5500010             | P4        | P5       | 0. rufipogon  | 0. nivara |         |          |
| 5: | 0.9500000 | P1            | 0.5500000             | P4        | P4       | 0. rufipogon  | 0. nivara |         |          |
| 6: | 1.0000000 | P1            | 0.5500000             | P4        | P4       | 0. rufipogon  | 0. nivara |         |          |
| 7: | 0.9500000 | P1            | 0.5500000             | P4        | P4       | 0. rufipogon  | 0. nivara |         |          |
| 8: | 0.9500000 | P2            | 0.4997681             | P4        | P4       | 0. rufipogon  | 0. nivara |         |          |

Now look at the correspondence among phenotypic groups and species.

```
> pGrpSan <- as.data.table(ggsankey::make_long(newGrp, GRIN_spp, newGrp3, newGrp4,
+   newGrp6, newGrp8))
> pGrpSan <- pGrpSan[, node :=
+   ifelse((node == "P2") & (x == "newGrp4"), "P2/P3", node) ]
> pGrpSan <- pGrpSan[, next_node :=
+   ifelse((next_node == "P2") & (next_x == "newGrp4"), "P2/P3", next_node) ]
> pInds <- c(paste0("P", c(4, 2)), "P2/P3", paste0("P", c(8, 7, 6, 5, 3, 1)))
> pGrpSan <- pGrpSan[, node := factor(node,
+   levels = c("0. nivara", "Oryza spp.", "0. rufipogon", pInds))]
> pGrpSan <- pGrpSan[, next_node := factor(next_node,
+   levels = c("0. nivara", "Oryza spp.", "0. rufipogon", pInds))]
> pGrpSan
```

|       | x        | node         | next_x  | next_node |
|-------|----------|--------------|---------|-----------|
| 1:    | GRIN_spp | 0. rufipogon | newGrp3 | P1        |
| 2:    | newGrp3  | P1           | newGrp4 | P4        |
| 3:    | newGrp4  | P4           | newGrp6 | P4        |
| 4:    | newGrp6  | P4           | newGrp8 | P3        |
| 5:    | newGrp8  | P3           | <NA>    | <NA>      |
| ---   |          |              |         |           |
| 1106: | GRIN_spp | 0. nivara    | newGrp3 | P1        |
| 1107: | newGrp3  | P1           | newGrp4 | P4        |
| 1108: | newGrp4  | P4           | newGrp6 | P4        |
| 1109: | newGrp6  | P4           | newGrp8 | P4        |
| 1110: | newGrp8  | P4           | <NA>    | <NA>      |

Plot.

```

> pdfFlNam <- "sankeyPGrpIRRI.pdf"
> showtext_auto()
> ggplot(data = pGrpSan, aes(x = x, next_x = next_x, node = node, next_node = next_node,
+                             fill = node, label = node)) +
+   geom_sankey(flow.alpha = 0.6, node.color = "grey30") +
+   geom_sankey_label(size = 5, color = "grey20", fill = "grey90", alpha = 0.8,
+                     label = c(expression(italic("0. nivara")),
+                               expression(italic("Oryza spp.")),
+                               expression(italic("0. rufipogon")),
+                               "P2", "P3", "P1", "P4", "P2/P3", "P1",
+                               "P4", "P2", "P6", "P5", "P3", "P1",
+                               "P4", "P2", "P8", "P7", "P6", "P5", "P3", "P1"))) +
+   scale_fill_manual(values = pGrp8Colors) +
+   scale_x_discrete(labels = c("species", "3", "4", "6", "8")) +
+   theme_sankey(base_size = 20, base_family = "myriad") +
+   theme(strip.background = element_rect(fill = "grey95", linetype = "blank"),
+         legend.position = "none") +
+   labs(x = expression(N[G]))
> ggsave(pdfFlNam, width = 8, height = 6, units = "in",
+         device = "pdf", useDingbats = FALSE)
> cat("\\includegraphics[width=0.9\\textwidth]{", pdfFlNam, "}"\\n\\n", sep = "")

```



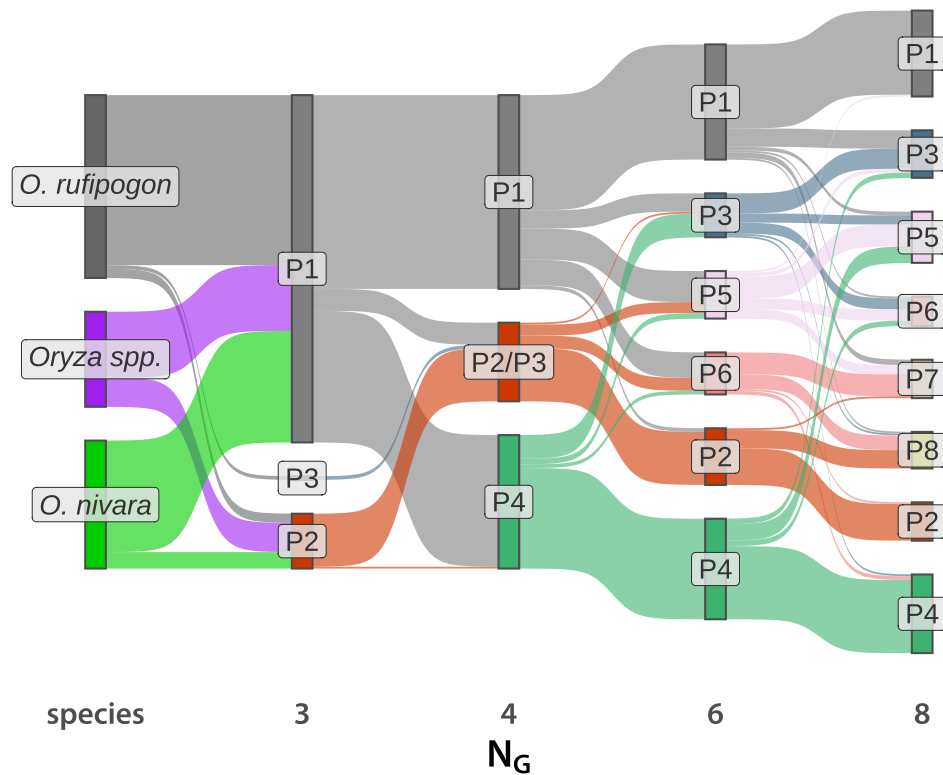

Plot individual  $N_G = 3$  results.

```
> pdfFlNam <- "sankeyPGrp3IRRI.pdf"
> pGrpSan <- as.data.table(ggsankey::make_long(p3Grp, newGrp3s1,
+                                             newGrp3s2, newGrp3s3, newGrp3))
> showtext_auto()
> ggplot(data = pGrpSan, aes(x = x, next_x = next_x, node = node, next_node = next_node,
+                             fill = node, label = node)) +
+   geom_sankey(flow.alpha = 0.6, node.color = "grey30") +
+   geom_sankey_label(size = 5, color = "grey20", fill = "grey90", alpha = 0.8) +
+   scale_fill_manual(values = pGrp8Colors) +
+   theme_sankey(base_size = 20, base_family = "myriad") +
+   theme(strip.background = element_rect(fill = "grey95", linetype = "blank"),
+         legend.position = "none")
> ggsave(pdfFlNam, width = 8, height = 6, units = "in",
+         device = "pdf", useDingbats = FALSE)
> cat("\\\\includegraphics[width=0.9\\textwidth]{", pdfFlNam, "}\\n\\n", sep = "")
```

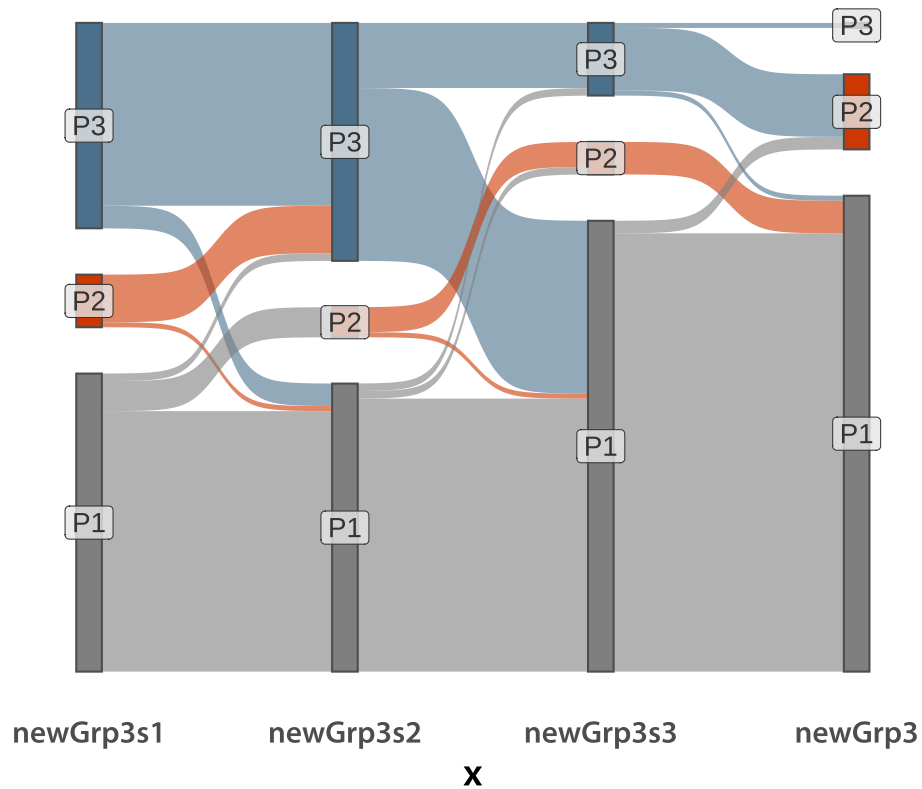

Make the supplemental table.

```
> oldTable <- fread("./germplasmSuppTable.tsv")
> oldTable <- merge(oldTable, newGrp[, .(NSFTV_ID, newGrp23, grp4p, GRIN_spp)],
+   by.x = "NSFTV_ID", by.y = "NSFTV_ID", all.x = TRUE, all.y = TRUE)
> oldTable <- oldTable[, grp4p := round(grp4p, 3)]
> oldTable <- merge(oldTable, rfmix[, .(NSFTV_ID, 0_sativa)],
+   by.x = "NSFTV_ID", by.y = "NSFTV_ID", all.x = TRUE, all.y = FALSE)
> fwrite(oldTable, file = "germplasmSuppTableNew.tsv", quote = FALSE, na = "NA",
+   sep = "\t")
```

Identify accessions with name changes.

```
> oldTable[Species != GRIN_spp & GRIN_spp != "Oryza spp.", ]
```

|    | NSFTV_ID | IRGC_ID    | Species      | Country     | Latitude   | Longitude   |
|----|----------|------------|--------------|-------------|------------|-------------|
| 1: | NID463   | IRGC104599 | O. rufipogon | Sri Lanka   | 7°40'N     | 80°10'E     |
| 2: | NID482   | IRGC105349 | O. rufipogon | India       | 10°30'N    | 76°6'E      |
| 3: | NID491   | IRGC105568 | O. rufipogon | Philippines | 7°52'48"N  | 125°0'21"E  |
| 4: | NID492   | IRGC105569 | O. rufipogon | Cambodia    | 12°46'17"N | 102°38'44"E |
| 5: | NID556   | IRGC105494 | O. rufipogon | Myanmar     | 18°49'0"N  | 95°13'0"E   |
| 6: | NID558   | IRGC105616 | O. rufipogon | China       | 23°44'56"N | 108°18'6"E  |
| 7: | NID666   | IRGC100211 | O. rufipogon | India       | 10°28'19"N | 76°25'28"E  |

```

8:  NID715 IRGC104497 O. rufipogon    Thailand 13°2'22''N 101°29'31''E
9:  NID735 IRGC105493 O. rufipogon    Myanmar  20°3'6''N  95°8'19''E
   Kim2016_population Huang2012_population IRRI_phenotype CU_phenotype DB_phenotype
1:                W2                <NA>          IRRI          CU          DB
2:                W2                <NA>          IRRI          CU          DB
3:                W2                Or-III         IRRI          <NA>        <NA>
4:                W2                Or-I           IRRI          CU          DB
5:                W4                Or-I           IRRI          <NA>        DB
6:                W4                <NA>           IRRI          <NA>        DB
7:                W2                <NA>           IRRI          CU          DB
8:  Admix of W4/ W1                <NA>           IRRI          CU          DB
9:                W4                Or-I           IRRI          <NA>        <NA>
   newGrp23 grp4p  GRIN_spp O_sativa
1:      P4 0.950 O. nivara    0.00
2:      P4 0.850 O. nivara    NA
3:      P4 0.850 O. nivara    0.05
4:      P4 0.850 O. nivara    0.04
5:      P4 0.950 O. nivara    0.10
6:      P4 1.000 O. nivara    0.13
7:      P4 0.950 O. nivara    NA
8:      P4 0.799 O. nivara    0.42
9:      P4 0.950 O. nivara    0.02

```

```

> fwrite(oldTable[Species != GRIN_spp & GRIN_spp != "Oryza spp.", ],
+   file = "nameChanges.tsv", quote = FALSE, na = "NA", sep = "\t")
> pureRufi <- rbind(oldTable[GRIN_spp == "O. rufipogon" &
+   Kim2016_population %in% c("W3", "W1", "W6") &
+   newGrp23 == "P1" & grp4p > 0.8 &
+   O_sativa < 0.2, ],
+   oldTable[GRIN_spp == "O. rufipogon" &
+   Kim2016_population %in% c("W3", "W1", "W6") &
+   newGrp23 == "P1" & grp4p > 0.8 &
+   is.na(O_sativa), ])
> fwrite(pureRufi, file = "pureRufi.tsv",
+   sep = "\t", quote = FALSE, na = "NA")
> pureNivara <- rbind(oldTable[GRIN_spp == "O. nivara" &
+   Kim2016_population %in% c("W2", "W4", "W5") &
+   newGrp23 == "P4" & grp4p > 0.8 &
+   O_sativa < 0.2, ],
+   oldTable[GRIN_spp == "O. nivara" &
+   Kim2016_population %in% c("W2", "W4", "W5") &
+   newGrp23 == "P4" & grp4p > 0.8 &
+   is.na(O_sativa), ])
> fwrite(pureNivara, file = "pureNivara.tsv",
+   sep = "\t", quote = FALSE, na = "NA")

```

Export the *p*-value matrices.

## 2 Relationship to genetic groups

Build the genetic population plot.

```
> popGrpColors <- c("P1" = "grey50", "P2/P3" = "orangered3",
+                  "P2" = "orangered3",
+                  "P3" = "skyblue4", "P4" = "mediumseagreen",
+                  "W1" = "grey50", "W2" = "palegreen3", "W3" = "grey40",
+                  "W4" = "olivedrab4", "W5" = "palegreen",
+                  "W6" = "lightsteelblue",
+                  "O. rufipogon" = "grey40", "O. nivara" = "green3",
+                  "Oryza spp." = "purple", "ADM/OSAT" = "orangered2")
> pGrpSan <- as.data.table(ggsankey::make_long(newGrp, GRIN_spp, newGrp23, genPop))
> sankeyLevels <- c("O. nivara", "Oryza spp.", "O. rufipogon", c("P4", "P2/P3", "P1"),
+                  paste0("W", c(5, 2, 4, 6, 1, 3)))
> pGrpSan <- pGrpSan[, node := factor(node, levels = sankeyLevels)]
> pGrpSan <- pGrpSan[, next_node := factor(next_node, levels = sankeyLevels)]
```

Plot.

```
> pdfFlNam <- "sankeyPGrpPopsIRRI.pdf"
> showtext_auto()
> ggplot(data = pGrpSan, aes(x = x, next_x = next_x, node = node, next_node = next_node,
+                           fill = node, label = node)) +
+   geom_sankey(flow.alpha = 0.6, node.color = "grey30") +
+   geom_sankey_label(size = 5, color = "grey20", fill = "grey90", alpha = 0.8) +
+   scale_fill_manual(values = popGrpColors) +
+   scale_x_discrete(labels = c("species", "phenotypic\ngroups",
+                               "genetic\nsubpopulations")) +
+   theme_sankey(base_size = 20, base_family = "myriad") +
+   theme(strip.background = element_rect(fill = "grey95", linetype = "blank"),
+         legend.position = "none") + labs(x = NULL)
> ggsave(pdfFlNam, width = 8, height = 6, units = "in",
+        device = "pdf", useDingbats = FALSE)
> cat("\\\\includegraphics[width=0.9\\textwidth]{", pdfFlNam, "}\n\n", sep = "")
```

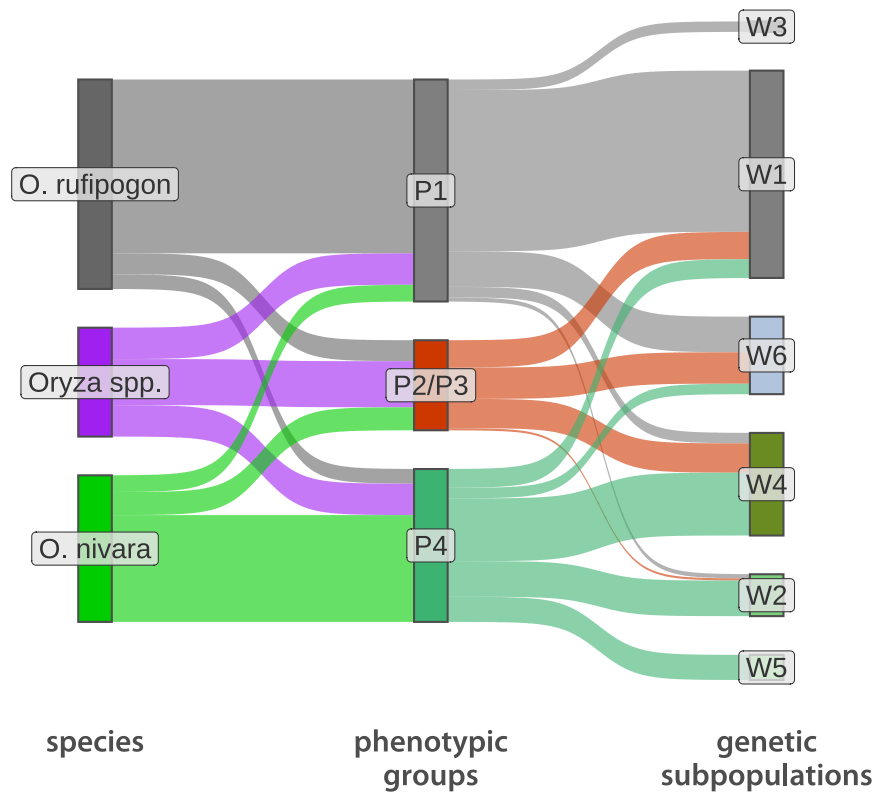

Fraction of accessions that are in the wrong P group.

```
> newGrp[(newGrp23 == "P1") &
+   (sspFixed == "O. nivara") &
+   (genPopK8 %in% c("W4", "W2")), .N]
```

```
[1] 1
```

```
> newGrp[(newGrp23 == "P4") &
+   (sspFixed == "O. rufipogon") &
+   (genPopK8 %in% c("W1", "W6")), .N]
```

```
[1] 9
```

```
> newGrp[(newGrp23 == "P1") &
+   (sspFixed == "O. nivara") &
+   (genPopK8 %in% c("W4", "W2")), .N]/newGrp[newGrp23 == "P1", .N]
```

```
[1] 0.009433962
```

```
> newGrp[(newGrp23 == "P4") &
+       (sspFixed == "O. rufipogon") &
+       (genPopK8 %in% c("W1", "W6")), .N]/newGrp[newGrp23 == "P4", .N]
```

```
[1] 0.1232877
```

```
> newGrp[, sum(newGrp23 == "P2/P3")]/newGrp[, .N]
```

```
[1] 0.1936937
```

Re-make the RFMIX genome fraction boxplots.

```
> sativaGrp <- c("ARO", "AUS", "IND", "TEJ", "TRJ", "O_sativa")
> sativaCols <- c("ARO" = "purple", "AUS" = "sienna1", "IND" = "yellow",
+               "TRJ" = "royalblue", "TEJ" = "blue")
> rufiGrp <- paste0("W", 1:6)
> rfmix <- rfmix[, sativaInd := ifelse(O_sativa >= 0.25, "O. sativa", "ORSC")]
> colSubset <- c("NSFTV_ID", "newGrp23")
> rfmixPG <- newGrp[, ..colSubset][rfmix, on = "NSFTV_ID", nomatch = 0]
> rfmixPG <- melt(rfmixPG, id.vars = colSubset,
+               measure.vars = c(sativaGrp, rufiGrp),
+               variable.name = "population",
+               value.name = "fraction")
> rfmixPG <- rfmixPG[, newGrp23 := factor(newGrp23, levels = c("P1", "P2/P3", "P4"))]
> rfmixPG
```

|       | NSFTV_ID | newGrp23 | population | fraction |
|-------|----------|----------|------------|----------|
| 1:    | NID405   | P4       | ARO        | 0.00     |
| 2:    | NID413   | P4       | ARO        | 0.00     |
| 3:    | NID446   | P4       | ARO        | 0.00     |
| 4:    | NID449   | P4       | ARO        | 0.00     |
| 5:    | NID450   | P4       | ARO        | 0.00     |
| ---   |          |          |            |          |
| 2108: | NID731   | P1       | W6         | 0.03     |
| 2109: | NID734   | P1       | W6         | 0.00     |
| 2110: | NID752   | P2/P3    | W6         | 0.00     |
| 2111: | NID753   | P1       | W6         | 0.03     |
| 2112: | NID759   | P1       | W6         | 0.02     |

First, I plot the fraction of *O. rufipogon* populations per  $N_G = 4$  phenotypic groups.

```
> pdfFlNam <- "rfmixRufiGrp4.pdf"
> showtext_auto()
> ggplot(data = rfmixPG[population %in% rufiGrp, ],
+       aes(x = newGrp23, y = fraction, fill = population)) +
+   geom_boxplot() +
+   scale_fill_manual(values = popGrpColors[6:11]) +
+   theme_classic(base_size = 14, base_family = "myriad") +
```

```

+   theme(legend.position = "top") +
+   xlab("phenotypic group") + ylab("genome fraction") +
+   labs(fill = "subpopulation")
> ggsave(pdfFlNam, width = 5, height = 5, units = "in",
+   device = "pdf", useDingbats = FALSE)
> cat("\\includegraphics[width = 0.95\\textwidth]{", pdfFlNam, "}\n\n", sep = "")

```

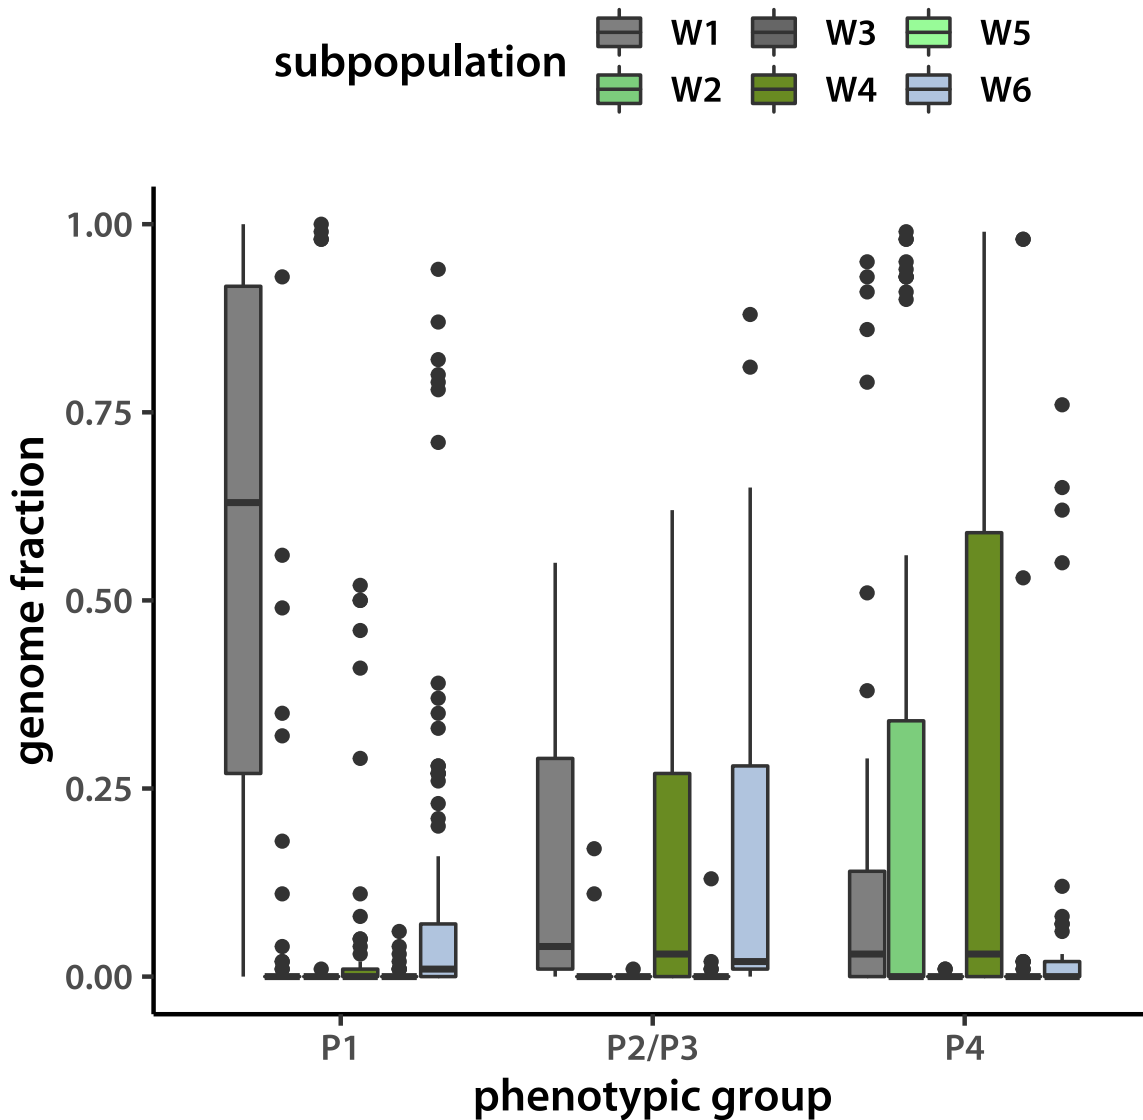

Now do the same with the *O. sativa* introgressions.

```

> pdfFlNam <- "rfmixSativaGrp4.pdf"
> showtext_auto()
> ggplot(data = rfmixPG[population %in% sativaGrp[-6], ],

```

```

+       aes(x = newGrp23, y = fraction, fill = population)) +
+     geom_boxplot() +
+     scale_fill_manual(values = sativaCols) +
+     theme_classic(base_size = 14, base_family = "myriad") +
+     theme(legend.position = "top") +
+     guides(fill = guide_legend(ncol = 3)) +
+     xlab("phenotypic group") + ylab("genome fraction") +
+     labs(fill = "subpopulation")
> ggsave(pdfFlNam, width = 5, height = 5, units = "in",
+       device = "pdf", useDingbats = FALSE)
> cat("\\includegraphics[width = 0.95\\textwidth]{", pdfFlNam, "}"\\n\\n", sep = "")

```

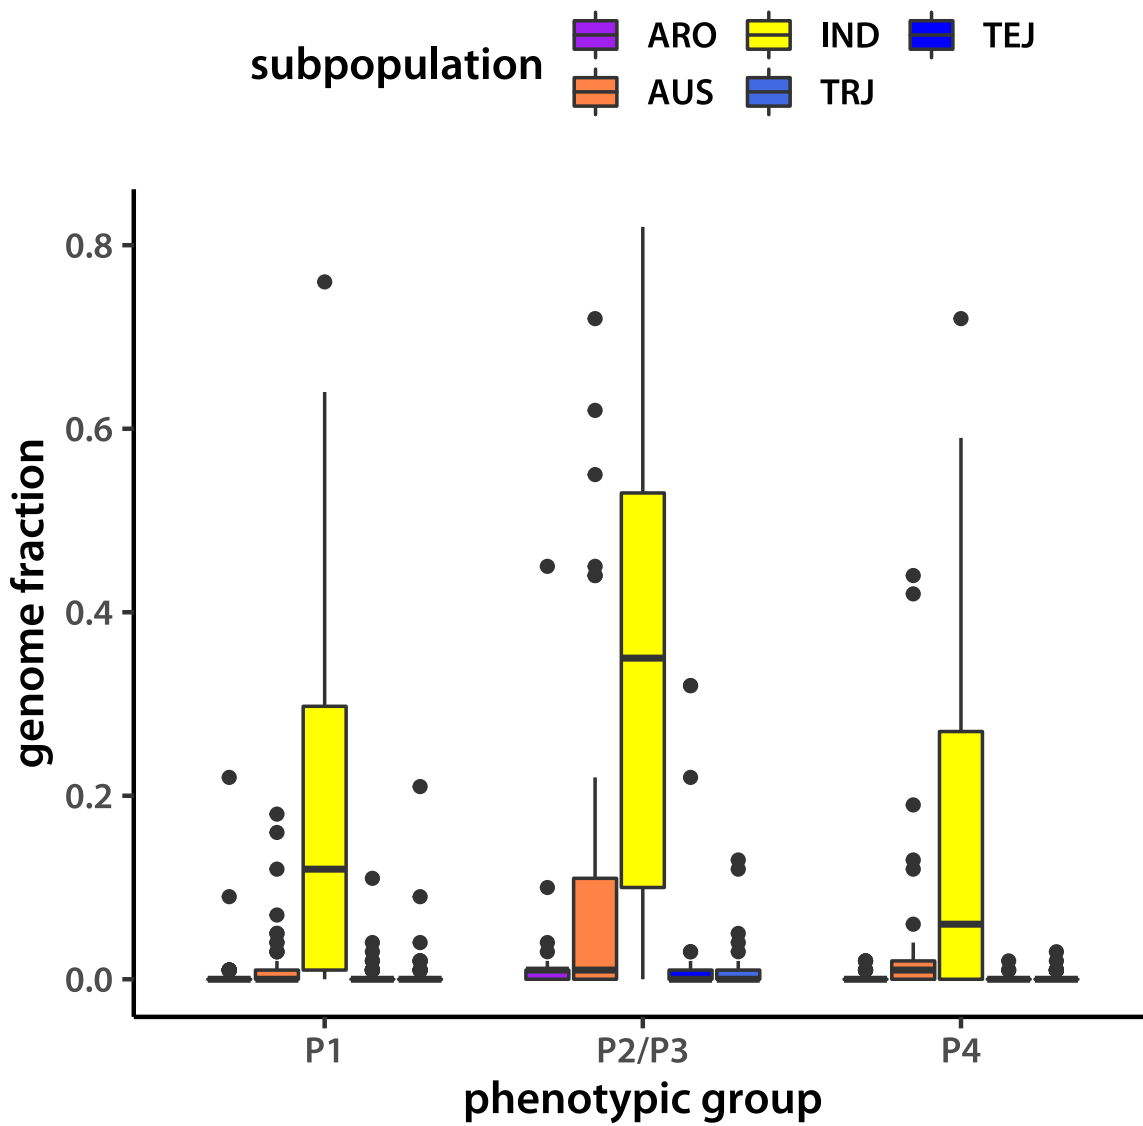



I next plot an binned cumulative distribution of genome fractions covered by *O. sativa* introgressions.

```
> rfmixSat <- rfmixPG[population == sativaGrp[6], ]
> cutOffs <- seq(from = 0.05, to = 1.0, by = 0.05)
> cumCount <- function(ct, vec){
+   sum(vec <= ct)
+ }
> rfmixSat <- rfmixSat[, sapply(cutOffs, cumCount, fraction), by = newGrp23 ]
> rfmixSat <- rfmixSat[, cumFrac := V1/(rfmixPG[population == sativaGrp[6], .N])]
> rfmixSat <- rfmixSat[, fracSat := factor(rep(cutOffs, times = 3), levels = cutOffs)]
> rfmixSat
```

|     | newGrp23 | V1          | cumFrac | fracSat |
|-----|----------|-------------|---------|---------|
| 1:  | P4 19    | 0.107954545 | 0.05    |         |
| 2:  | P4 24    | 0.136363636 | 0.1     |         |
| 3:  | P4 27    | 0.153409091 | 0.15    |         |
| 4:  | P4 28    | 0.159090909 | 0.2     |         |
| 5:  | P4 32    | 0.181818182 | 0.25    |         |
| 6:  | P4 35    | 0.198863636 | 0.3     |         |
| 7:  | P4 38    | 0.215909091 | 0.35    |         |
| 8:  | P4 40    | 0.227272727 | 0.4     |         |
| 9:  | P4 44    | 0.250000000 | 0.45    |         |
| 10: | P4 46    | 0.261363636 | 0.5     |         |
| 11: | P4 47    | 0.267045455 | 0.55    |         |
| 12: | P4 48    | 0.272727273 | 0.6     |         |
| 13: | P4 48    | 0.272727273 | 0.65    |         |
| 14: | P4 48    | 0.272727273 | 0.7     |         |
| 15: | P4 49    | 0.278409091 | 0.75    |         |
| 16: | P4 49    | 0.278409091 | 0.8     |         |
| 17: | P4 49    | 0.278409091 | 0.85    |         |
| 18: | P4 49    | 0.278409091 | 0.9     |         |
| 19: | P4 49    | 0.278409091 | 0.95    |         |
| 20: | P4 49    | 0.278409091 | 1       |         |
| 21: | P2/P3 0  | 0.000000000 | 0.05    |         |
| 22: | P2/P3 1  | 0.005681818 | 0.1     |         |
| 23: | P2/P3 2  | 0.011363636 | 0.15    |         |
| 24: | P2/P3 3  | 0.017045455 | 0.2     |         |
| 25: | P2/P3 3  | 0.017045455 | 0.25    |         |
| 26: | P2/P3 4  | 0.022727273 | 0.3     |         |
| 27: | P2/P3 7  | 0.039772727 | 0.35    |         |
| 28: | P2/P3 8  | 0.045454545 | 0.4     |         |
| 29: | P2/P3 11 | 0.062500000 | 0.45    |         |
| 30: | P2/P3 14 | 0.079545455 | 0.5     |         |
| 31: | P2/P3 19 | 0.107954545 | 0.55    |         |
| 32: | P2/P3 23 | 0.130681818 | 0.6     |         |
| 33: | P2/P3 27 | 0.153409091 | 0.65    |         |
| 34: | P2/P3 31 | 0.176136364 | 0.7     |         |
| 35: | P2/P3 35 | 0.198863636 | 0.75    |         |
| 36: | P2/P3 35 | 0.198863636 | 0.8     |         |

|     |       |    |             |      |
|-----|-------|----|-------------|------|
| 37: | P2/P3 | 37 | 0.210227273 | 0.85 |
| 38: | P2/P3 | 37 | 0.210227273 | 0.9  |
| 39: | P2/P3 | 37 | 0.210227273 | 0.95 |
| 40: | P2/P3 | 37 | 0.210227273 | 1    |
| 41: | P1    | 32 | 0.181818182 | 0.05 |
| 42: | P1    | 40 | 0.227272727 | 0.1  |
| 43: | P1    | 45 | 0.255681818 | 0.15 |
| 44: | P1    | 55 | 0.312500000 | 0.2  |
| 45: | P1    | 58 | 0.329545455 | 0.25 |
| 46: | P1    | 65 | 0.369318182 | 0.3  |
| 47: | P1    | 71 | 0.403409091 | 0.35 |
| 48: | P1    | 76 | 0.431818182 | 0.4  |
| 49: | P1    | 80 | 0.454545455 | 0.45 |
| 50: | P1    | 81 | 0.460227273 | 0.5  |
| 51: | P1    | 84 | 0.477272727 | 0.55 |
| 52: | P1    | 84 | 0.477272727 | 0.6  |
| 53: | P1    | 87 | 0.494318182 | 0.65 |
| 54: | P1    | 88 | 0.500000000 | 0.7  |
| 55: | P1    | 89 | 0.505681818 | 0.75 |
| 56: | P1    | 89 | 0.505681818 | 0.8  |
| 57: | P1    | 90 | 0.511363636 | 0.85 |
| 58: | P1    | 90 | 0.511363636 | 0.9  |
| 59: | P1    | 90 | 0.511363636 | 0.95 |
| 60: | P1    | 90 | 0.511363636 | 1    |

newGrp23 V1 cumFrac fracSat

```
> rfmixSat <- rfmixSat[!(fracSat %in% c("0.9", "0.95", "1")), ]

> pdfFlNam <- "cum0satFrac.pdf"
> showtext_auto()
> ggplot(data = rfmixSat, aes(x = fracSat, y = cumFrac, fill = newGrp23)) +
+   geom_col() +
+   scale_fill_manual(values = pGrp8Colors[c(1, 3, 9)]) +
+   theme_classic(base_size = 18, base_family = "myriad") +
+   labs(fill = "phenotypic\ngroups") +
+   theme(strip.background = element_rect(fill = "grey95", linetype = "blank"),
+         axis.text.x = element_text(angle = 45, hjust = 1, vjust = 1)) +
+   xlab("cumulative 0. sativa fraction") + ylab("fraction of all accessions")
> ggsave(pdfFlNam, width = 8, height = 6, units = "in",
+       device = "pdf", useDingbats = FALSE)
> cat("\\includegraphics{" , pdfFlNam, "}" , sep = "")
```

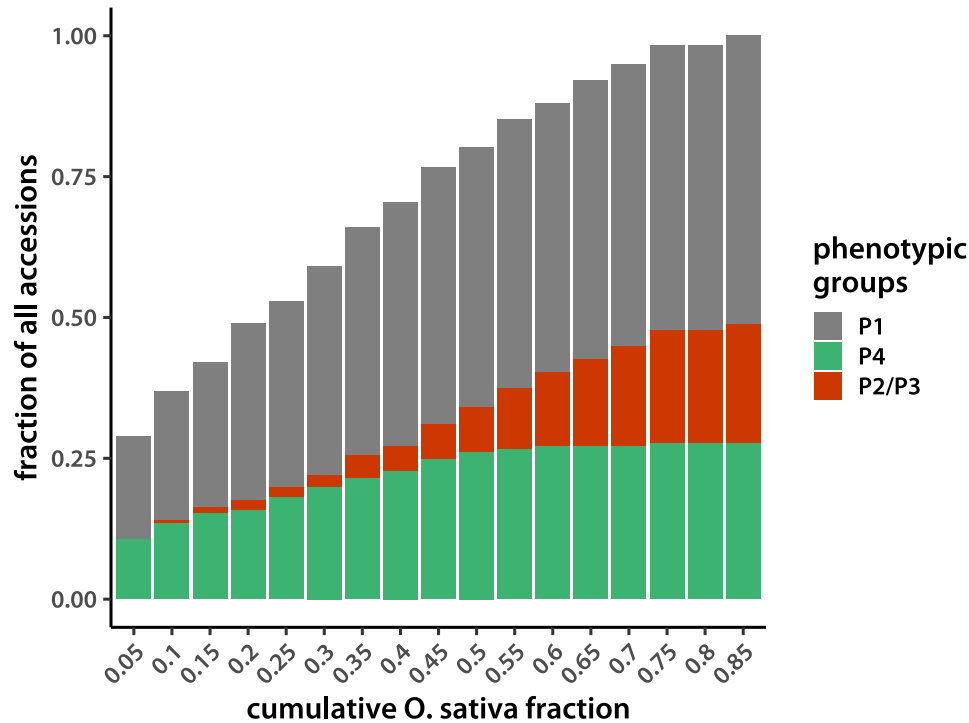

### 3 Geographical distributions

I next plot the phenotypic groups on a map.

```
> coordData <- fread("./huangKimMergeJeremy.tsv")
> coordData <- coordData[Study == "Kim", ]
> keepData <- c("ID", "Country", "Latitude", "Longitude")
> coordData <- coordData[, ..keepData]
> coordGrp <- newGrp[coordData, on = "NSFTV_ID == ID", nomatch = 0]
> coordGrp <- coordGrp[!is.na(Longitude) & !is.na(Latitude), ]
> coordGrp <- coordGrp[, newGrp23 := factor(newGrp23, levels = c("P1", "P2/P3", "P4"))]
> world <- ne_countries(scale = "medium", returnclass = "sf")
> lonRange <- range(coordGrp[, Longitude])
> latRange <- range(coordGrp[, Latitude])
```

Plot.

```
> pdfFlNam <- "mapIRRIp4.pdf"
> showtext_auto()
> ggplot(data = world) +
+   geom_sf(fill = "ivory") +
+   coord_sf(xlim = lonRange, ylim = latRange) +
+   annotation_scale(location = "bl", width_hint = 0.4) +
+   geom_jitter(data = coordGrp, aes(x = Longitude, y = Latitude,
```

```
+           color = newGrp23, alpha = grp4p), size = 2.3, width = 0.9) +
+   scale_color_manual(values = pGrp8Colors[c(1, 3, 9)]) +
+   theme_classic(base_size = 18, base_family = "myriad") +
+   labs(color = "phenotypic\ngroup") +
+   guides(alpha = "none") +
+   theme(panel.background = element_rect(fill = "aliceblue"),
+         legend.position = "top") +
+   ylab("") + xlab("")
> ggsave(pdfFlNam, width = 7, height = 8, units = "in",
+       device = "pdf", useDingbats = FALSE)
> cat("\\\\includegraphics[width = 0.95\\textwidth]{", pdfFlNam, "}"\\n\\n", sep = "")
```

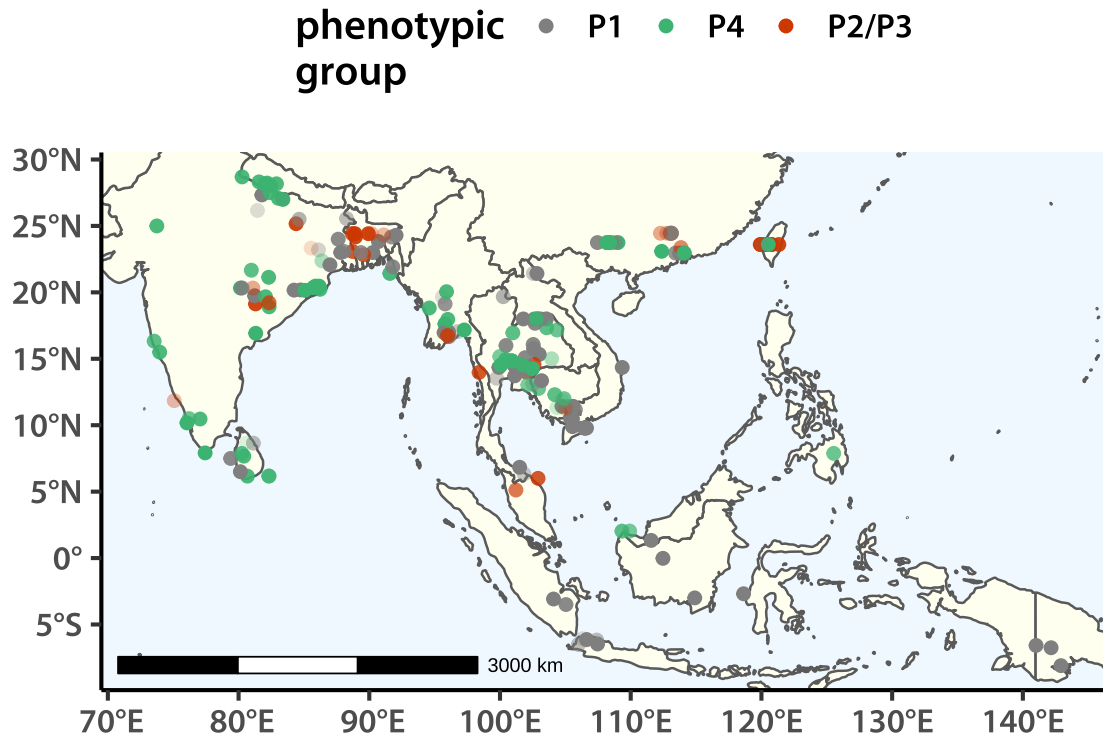

Plot the pure species.

```
> newGrpPure <- newGrp[NSFTV_ID %in% c(pureRufi$NSFTV_ID, pureNivara$NSFTV_ID), ]
> coordGrp    <- newGrpPure[coordData, on = "NSFTV_ID == ID", nomatch = 0]
> coordGrp    <- coordGrp[!is.na(Longitude) & !is.na(Latitude), ]
```

Plot.

```
> pdfFlNam <- "mapPureSpp.pdf"
> showtext_auto()
> ggplot(data = world) +
+   geom_sf(fill = "ivory") +
+   coord_sf(xlim = lonRange, ylim = latRange) +
+   annotation_scale(location = "bl", width_hint = 0.4) +
+   geom_jitter(data = coordGrp, aes(x = Longitude, y = Latitude,
+                                     color = GRIN_spp), size = 2.3, width = 0.8) +
+   scale_color_manual(values = sppColors[1:2],
+                       labels = c(expression(italic("O. rufipogon")), expression(italic("O. nivara")))) +
+   theme_classic(base_size = 18, base_family = "myriad") +
+   labs(color = "species") +
+   guides(alpha = "none") +
+   theme(panel.background = element_rect(fill = "aliceblue"),
+         legend.position = "top") +
+   ylab("") + xlab("")
> ggsave(pdfFlNam, width = 7, height = 8, units = "in",
+         device = "pdf", useDingbats = FALSE)
> cat("\\\\includegraphics[width = 0.95\\textwidth]{", pdfFlNam, "}\\n\\n", sep = "")
```

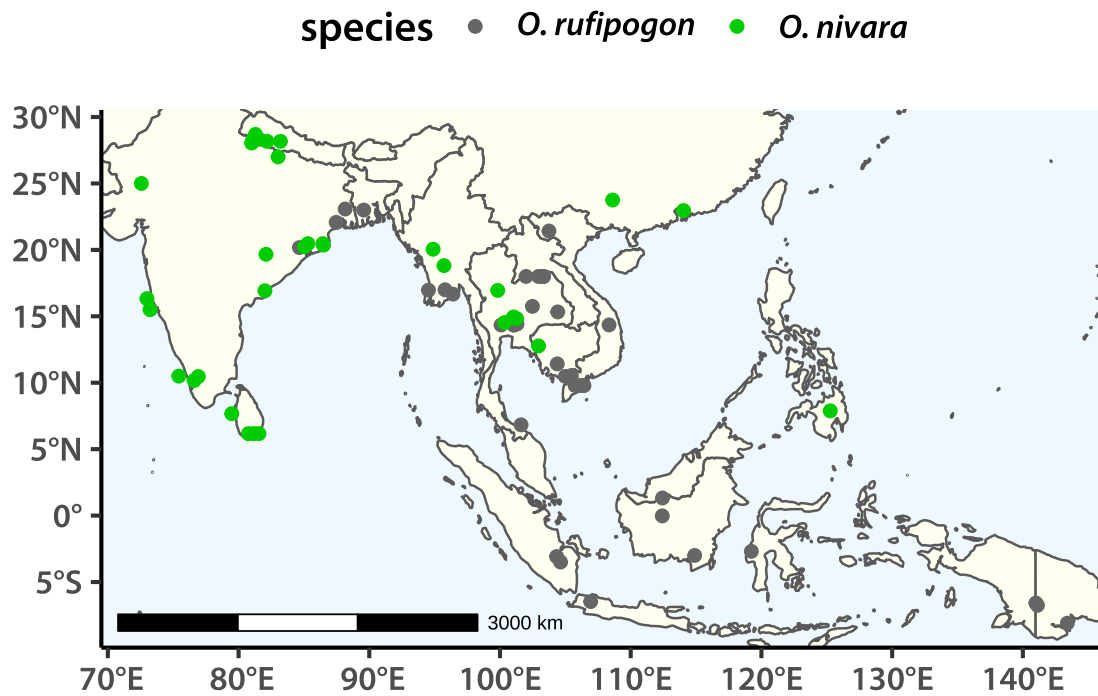

## 4 Trait subsets

Calculate group discrimination scores for all traits.

```
> Ysc      <- matrix(unlist(Ysc), nrow = N)
> Psc      <- pMatIRRI4[, 1:2]
> Psc[, 2] <- Psc[, 2] + pMatIRRI4[, 3]
```

```

> Psc      <- scale(Psc, scale = FALSE)
> betaEst  <- solve(crossprod(Ysc), crossprod(Ysc, Psc))
> Rsd      <- Psc - Ysc%%betaEst
> Sest     <- crossprod(Rsd)
> Sest     <- chol2inv(chol(Sest))
> mhlDist  <- apply(betaEst, 1, mhl, Sest)
> XtX      <- colSums(Ysc*Ysc)
> mhlDist  <- mhlDist*XtX
> mhlDT    <- data.table(mhlD = mhlDist, IRRI = trtNamesNB)
> mhlDT    <- mhlDT[trtNames, on = "IRRI", nomatch = 0]
> mhlDT    <- setorder(mhlDT, -mhlD)
> mhlDT    <- mhlDT[, IRRI := factor(IRRI, levels = unique(IRRI))]
> mhlDT

```

|     | mhlD         | IRRI        | binary | Planteome    |
|-----|--------------|-------------|--------|--------------|
| 1:  | 7.119060e-01 | CULT        | 0      | PTHT         |
| 2:  | 6.994920e-01 | UNFILLED    | 0      | UNFILGRNB    |
| 3:  | 2.754994e-01 | AWNWD       | 0      | AWNWD        |
| 4:  | 2.647407e-01 | 2LLT        | 0      | PENLFLG      |
| 5:  | 2.291304e-01 | AWNLT       | 0      | AWNLG        |
| 6:  | 2.174085e-01 | STLWD       | 0      | STLEMWD      |
| 7:  | 2.070679e-01 | ANTLT       | 0      | ANTLT        |
| 8:  | 1.838106e-01 | DIST        | 0      | PanBasBrDist |
| 9:  | 1.715226e-01 | CUDI        | 0      | CUDI         |
| 10: | 1.301208e-01 | SPKWD       | 0      | SPKWD        |
| 11: | 1.099093e-01 | FERT        | 0      | SPKFRT       |
| 12: | 9.692020e-02 | CUHABIT_VEG | 0      | CULMHAB_VEG  |
| 13: | 9.434603e-02 | PNNB        | 0      | PNNB         |
| 14: | 8.401237e-02 | SPKLT       | 0      | SPKLG        |
| 15: | 7.225529e-02 | PNLG        | 0      | PNLG         |
| 16: | 6.101713e-02 | CUHABIT     | 0      | CULMHAB      |
| 17: | 5.683213e-02 | FLFWD       | 0      | FLFLWD       |
| 18: | 4.301428e-02 | LIGLT       | 0      | LIGLG        |
| 19: | 3.619160e-02 | 2LWD        | 0      | PENLFLWD     |
| 20: | 3.159207e-02 | STGLT       | 0      | STIGLG       |
| 21: | 2.792544e-02 | STYLT       | 0      | STYLLG       |
| 22: | 2.583463e-02 | PANTYPE     | 0      | PANTYP       |
| 23: | 2.149031e-02 | PANBASE     | 0      | PBRNB        |
| 24: | 2.037659e-02 | DTHD        | 0      | DTHD         |
| 25: | 1.776284e-02 | FLFLG       | 0      | FLFLG        |
| 26: | 1.546352e-02 | FLAGATT     | 0      | LFAG         |
| 27: | 1.300272e-02 | PAMB        | 0      | PanAxAtt     |
| 28: | 8.927354e-03 | PAN2BR      | 0      | Pan2ndBr     |
| 29: | 8.855837e-03 | PANEXS      | 0      | PANEXS       |
| 30: | 2.520883e-03 | STLLT       | 0      | STLEMLG      |
| 31: | 1.249988e-03 | LEAF        | 0      | LSEN         |
| 32: | 4.167162e-05 | CUNO        | 0      | CUNO         |
|     | mhlD         | IRRI        | binary | Planteome    |



```
> fwrite(mhlDT, file = "./MahalanobisIRRI.tsv", sep = "\t", quote = FALSE)
```

Plot the sorted distances.

```
> pdfFlNam <- "traitMhlIRRI.pdf"
> showtext_auto()
> ggplot(data = mhlDT, aes(x = IRRI, y = mhlD)) +
+   geom_col(fill = "grey80") +
+   theme_classic(base_size = 18, base_family="myriad") +
+   theme(axis.text.x = element_text(angle = 90, hjust = 1, vjust = 0.5, size = 12)) +
+   ylab(expression("Hotelling T"^2)) + xlab("Trait name")
> ggsave(pdfFlNam, width = 10, height = 6, units = "in",
+   device = "pdf", useDingbats = FALSE)
> cat("\\includegraphics{", pdfFlNam, "}\n\n", sep = "")
```

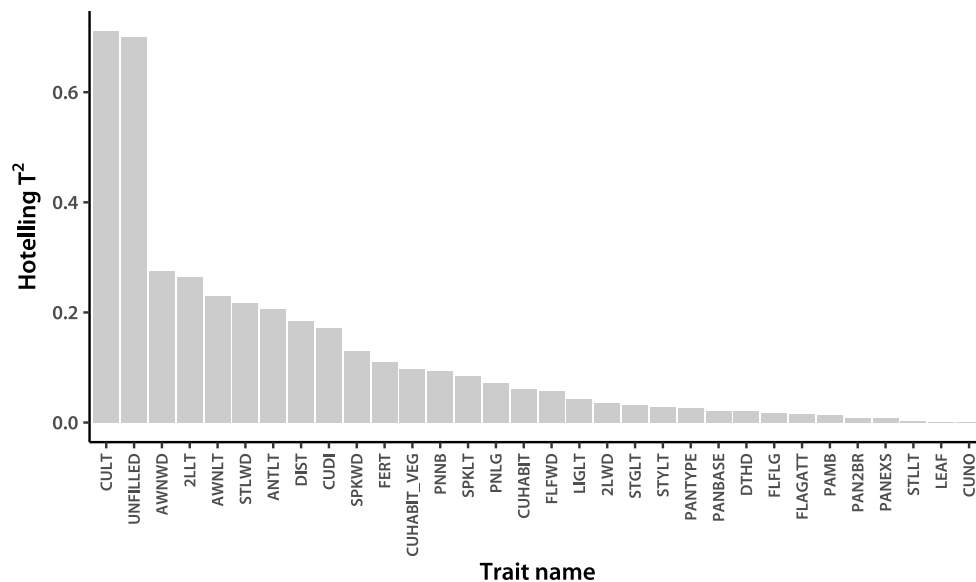

Build trait value boxplots.

```
> trtNID <- c("NSFTV_ID", mhlDT[, as.character(IRRI)])
> traitGP <- newGrp[, ..colSubset][phenoAll[, ..trtNID], on = "NSFTV_ID"]
> traitLG <- melt(traitGP, id.vars = c("NSFTV_ID", "newGrp23"),
+   variable.name = "trait",
+   measure.vars = trtNID[-1], value.name = "value")
> traitLG <- traitLG[, newGrp23 := factor(newGrp23, levels = c("P1", "P2/P3", "P4"))]
> traitLG <- traitLG[, trait := factor(trait, levels = mhlDT[, as.character(IRRI)])]

> pdfFlNam <- "traitsIRRIbexp4.pdf"
> showtext_auto()
> ggplot(data = traitLG, aes(x = newGrp23, y = value, fill = newGrp23)) +
+   geom_boxplot(show.legend = FALSE) +
```

```
+   scale_fill_manual(values = popGrpColors) +
+   facet_wrap(~trait, ncol = 5, scales = "free_y") +
+   theme_classic(base_size = 12, base_family = "myriad") +
+   theme(strip.background = element_rect(fill = "grey95", linetype = "blank"),
+         strip.text = element_text(size = 10, margin = margin(c(1, 0, 1, 0), "pt"))) +
+   xlab("phenotypic group")
> ggsave(pdfFlNam, width = 8, height = 10, units = "in",
+       device = "pdf", useDingbats = FALSE)
> cat("\\\\includegraphics[width = 0.95\\textwidth]{", pdfFlNam, "}\n\n", sep = "")
```

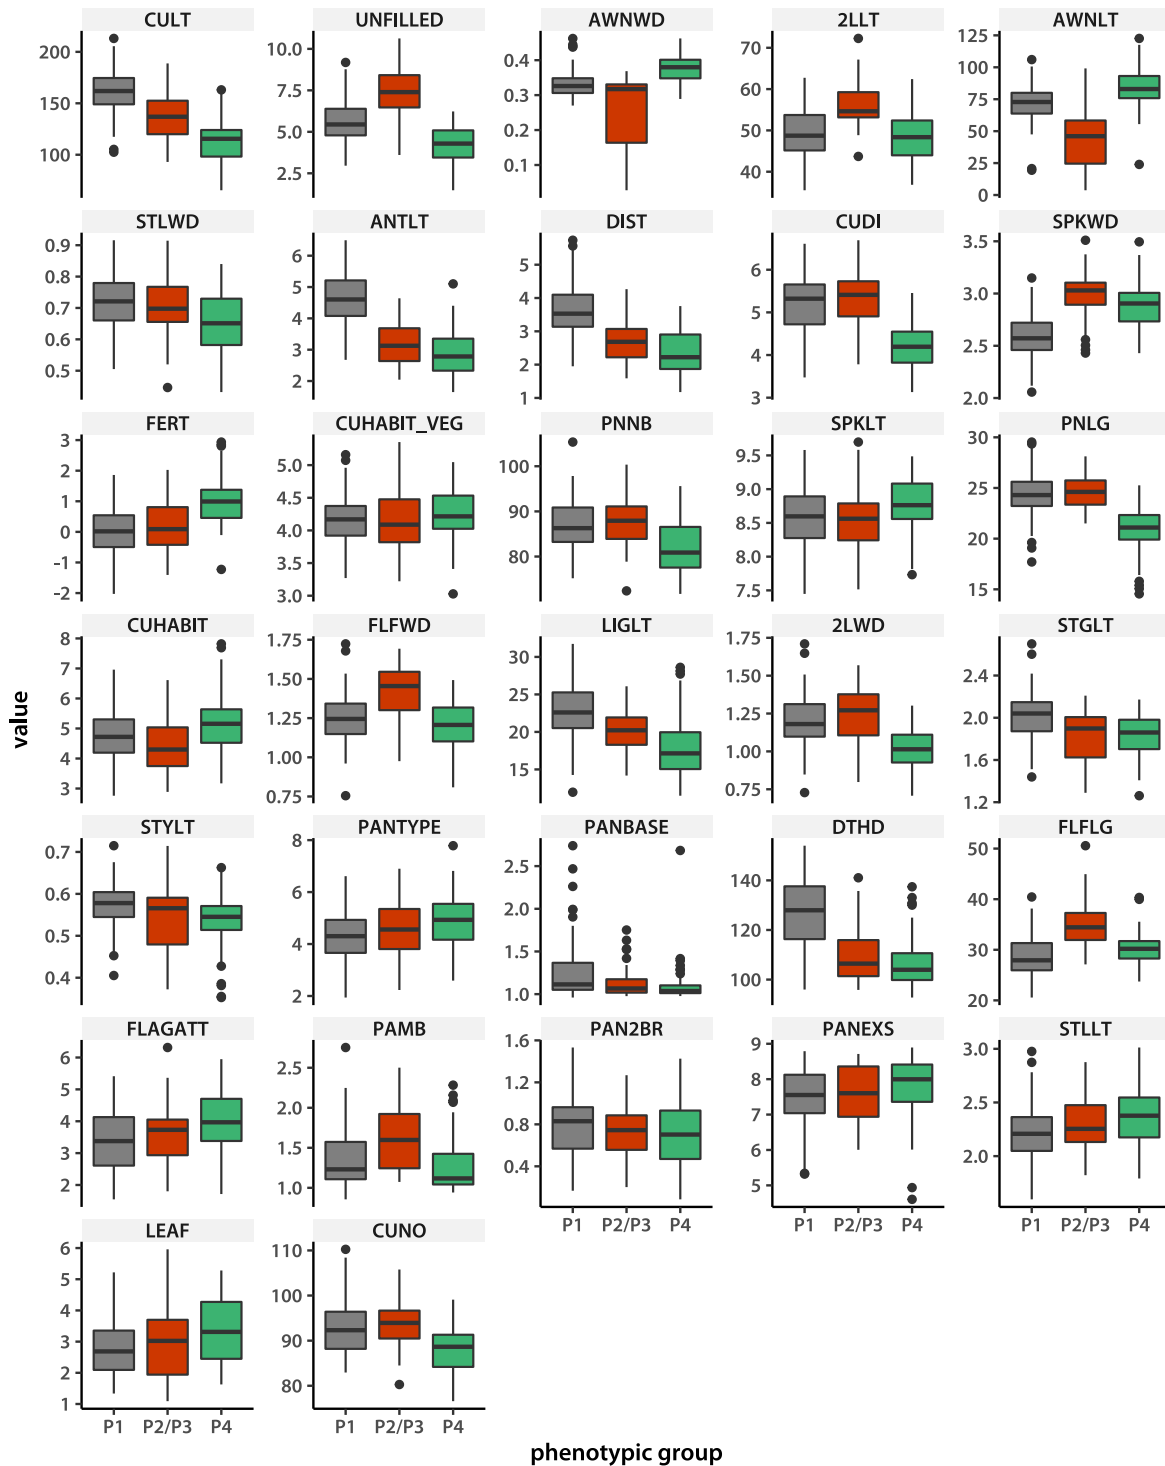

Subset of traits for the main text.

```
> pdfFlNam <- "traitsIRRIbxpP4sixTr.pdf"
> trtSubs <- c("CULT", "DTHD", "SPKWD", "ANTLT", "FERT", "PNLG")
```

```

> showtext_auto()
> ggplot(data = traitLG[trait %in% trtSubs],
+       aes(x = newGrp23, y = value, fill = newGrp23)) +
+   geom_boxplot(show.legend = FALSE) +
+   scale_fill_manual(values = popGrpColors) +
+   facet_wrap(~trait, ncol = 3, scales = "free_y") +
+   theme_classic(base_size = 14, base_family = "myriad") +
+   theme(strip.background = element_rect(fill = "grey95", linetype = "blank"),
+         strip.text = element_text(size = 12, margin = margin(c(1, 0, 1, 0), "pt")))) +
+   xlab("phenotypic group")
> ggsave(pdfFlNam, width = 8, height = 6, units = "in",
+       device = "pdf", useDingbats = FALSE)
> cat("\\\\includegraphics[width = 0.95\\textwidth]{", pdfFlNam, "}\n\n", sep = "")

```

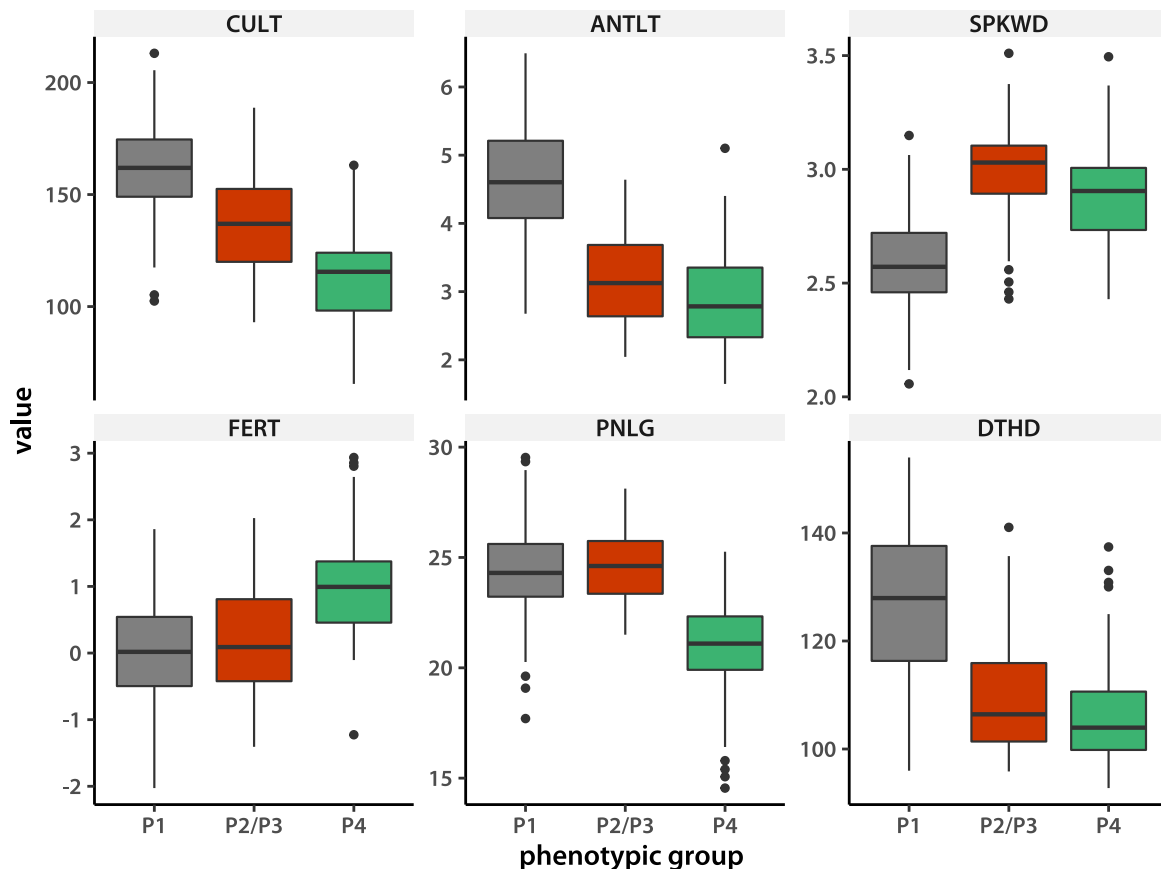

Trait coefficients of variation next.

```

> traitVar <- traitLG[, .(traitCV = sd(value)), by = .(newGrp23, trait)]
> traitVar <- traitVar[, traitCV :=
+   traitCV/rep(traitLG[, mean(value), by = trait]$V1, each = 3)]
> traitVar <- traitVar[, cvCV := sd(traitCV)/mean(traitCV), by = trait]
> traitVar <- traitVar[, trait := factor(trait, levels = mhlDT[, as.character(IRRI)]]]

```

Plot.

```
> pdfFlNam <- "traitSdIRRIBp4.pdf"
> showtext_auto()
> ggplot(data = traitVar,
+       aes(x = newGrp23, y = traitCV, fill = newGrp23)) +
+   geom_col(show.legend = FALSE) +
+   scale_fill_manual(values = popGrpColors) +
+   facet_wrap(~trait, ncol = 5, scales = "free_y") +
+   theme_classic(base_size = 14, base_family = "myriad") +
+   theme(strip.background = element_rect(fill = "grey95", linetype = "blank")) +
+   ylab("coefficient of variation") + xlab("phenotypic group")
> ggsave(pdfFlNam, width = 8, height = 10, units = "in",
+       device = "pdf", useDingbats = FALSE)
> cat("\\\\includegraphics[width = 0.95\\textwidth]{", pdfFlNam, "}\n\n", sep = "")
```

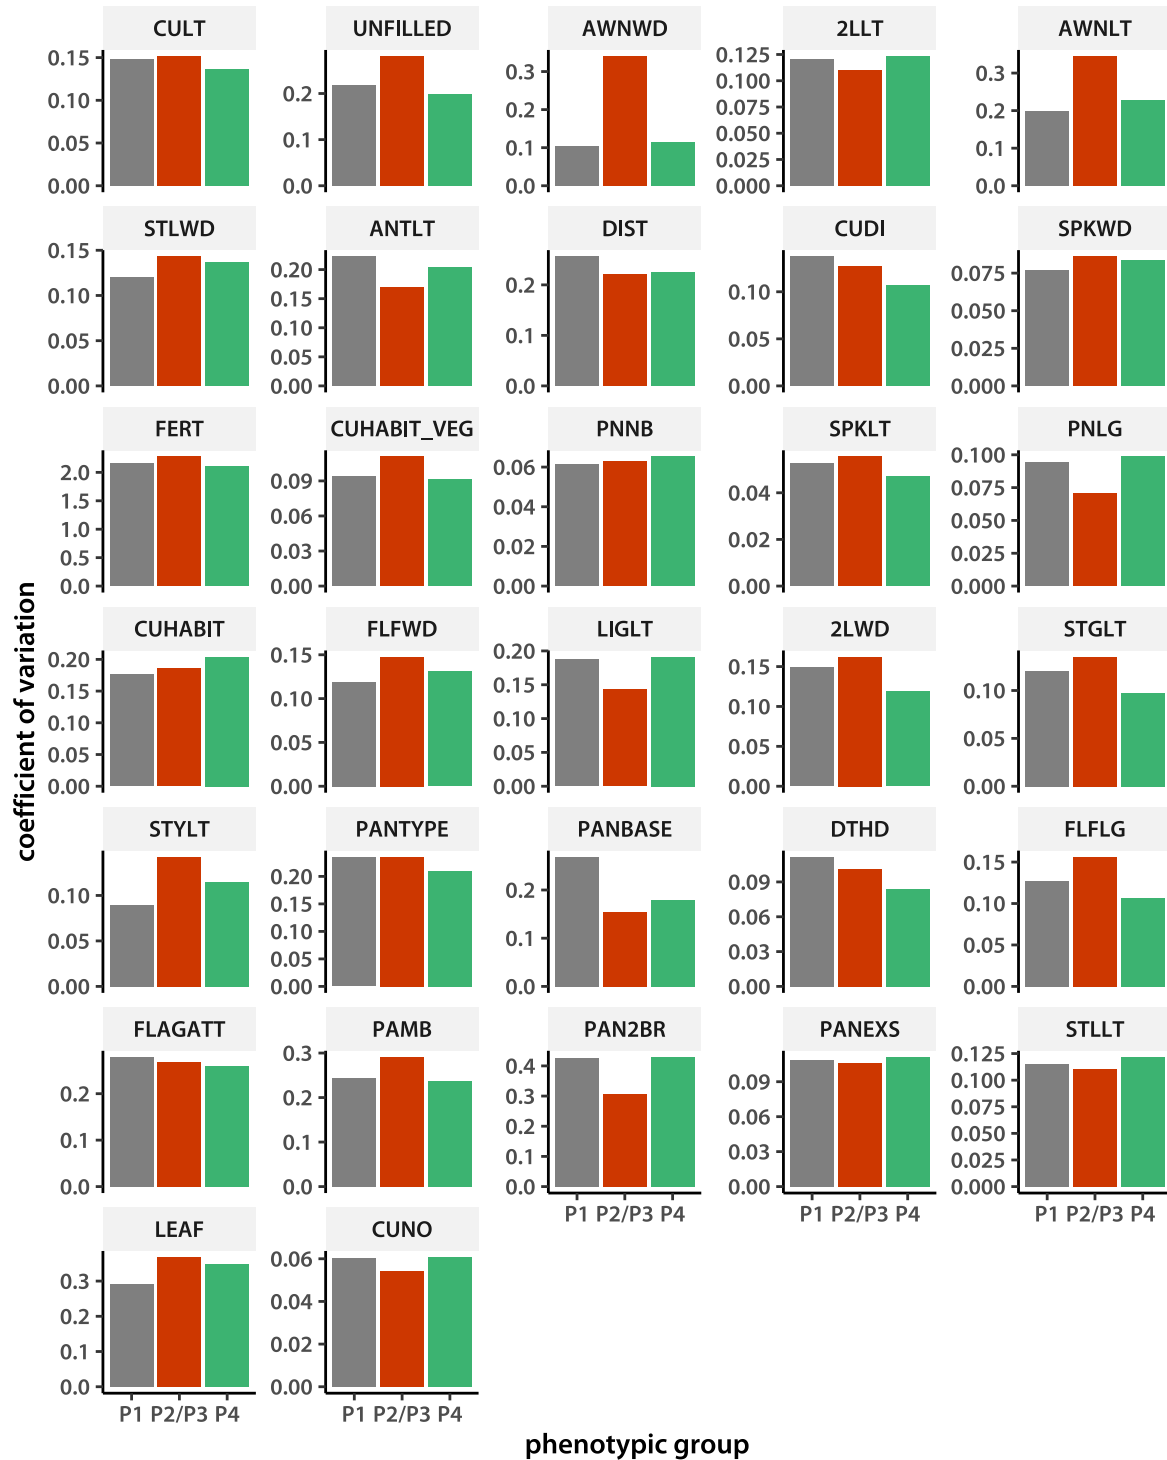

Finally, I compare trait correlations across groups.

```
> allTraits <- c("FERT", "FLFLG", "2LLT", "ANTLT", "LIGLT", "PANBASE",
+               "UNFILLED", "DTHD", "CUDI", "CULT", "DIST", "PNLG", "FLFWD", "2LWD",
```

```

+           "SPKLT", "STLWD", "SPKWD", "STLLT", "STYLT", "AWNLT", "AWNWD",
+           "STGLT", "PAN2BR", "LEAF", "PANEXS", "CUHABIT",
+           "CUHABIT_VEG", "FLAGATT", "PANTYPE", "PAMB", "CUNO", "PNNB")
> d      <- length(allTraits)
> Ngrp   <- 3
> corList <- list(P1 = NULL, "P2/P3" = NULL, P4 = NULL)
> grpCor  <- cor(matrix(unlist(traitGP[newGrp23 == "P1", ..allTraits]),
+                        ncol = d))
> colnames(grpCor) <- allTraits
> rownames(grpCor) <- allTraits
> corList$P1      <- grpCor
> grpCor[row(grpCor) >= col(grpCor)] <- NA
> corDT <- data.table(correlation = array(grpCor),
+                      x          = paste(rep(allTraits, each = d), "P1", sep = "."),
+                      y          = rep(allTraits, times = d),
+                      group      = rep("P1", times = d^2))
> corDT <- corDT[!is.na(correlation), ]
> for (grp in c("P2/P3", "P4")){
+   grpCor <- cor(matrix(unlist(traitGP[newGrp23 == grp, ..allTraits]),
+                        ncol = d))
+   colnames(grpCor) <- allTraits
+   rownames(grpCor) <- allTraits
+   corList[[grp]] <- grpCor
+   if (grp == "P2/P3"){
+     grpCor[row(grpCor) > col(grpCor)] <- NA
+     diag(grpCor) <- 0.0
+   } else {
+     grpCor[row(grpCor) >= col(grpCor)] <- NA
+   }
+   corDT <- rbind(corDT, data.table(correlation = array(grpCor),
+                                                         x          = paste(rep(allTraits, each = d), grp, sep = "."),
+                                                         y          = rep(allTraits, times = d),
+                                                         group      = rep(grp, times = d^2)))
+   corDT <- corDT[!is.na(correlation), ]
+   corDT[paste(y, "P1", sep = ".") == x, group := NA]
+ }
> corDT <- corDT[, x := factor(x, levels = paste(rep(allTraits, each = Ngrp),
+                                                  rep(c("P1", "P2/P3", "P4"), times = d), sep = "."))]
> corDT <- corDT[, y := factor(y, levels = allTraits)]

```

Now develop a permutation test to see if such differences are expected by chance. I will randomly re-assign accessions to phenotypic groups, re-estimate among-trait correlations with each group, and report among-group ranges for each trait pair.

```

> lowTrCor <- function(mat){
+   cmat <- cor(mat)

```

```

+   return(cmat[row(cmat) < col(cmat)])
+ }
> oneSample <- function(){
+   tmpDT <- traitGP[, .(corPer = lowTrCor(.SD)),
+     by = sample(newGrp23), .SDcols = allTraits]
+   tmpDT <- tmpDT[, traitPair := ..traitPair]
+   tmpDT <- tmpDT[, .(corSpanPer = diff(range(corPer))), by = traitPair]
+   return(tmpDT[, corSpanPer])
+ }
> getPval <- function(vec){
+   return( (sum(vec[1] <= vec[-1]) + 1)/length(vec) )
+ }
> traitGP <- traitGP[, newGrp23 := factor(newGrp23, levels = c("P1", "P2/P3", "P4"))]
> if (file.exists("corPvalIRRI.tsv")) {
+   pValDT <- fread("corPvalIRRI.tsv")
+ } else {
+   traitPair <- corDT[sub("\\.P.", "", x) != y, ]
+   traitPair <- traitPair[, traitPair := paste(sub("\\.P.", "", x), y, sep = ".")]
+   traitPair <- traitPair[, traitPair]
+   ltCorDT <- traitGP[, .(corTrue = lowTrCor(.SD)),
+     by = newGrp23, .SDcols = allTraits]
+   ltCorDT <- ltCorDT[, traitPair := ..traitPair]
+   ltCorDT <- ltCorDT[, .(corSpan = diff(range(corTrue))), by = traitPair]
+   spanPerMat <- replicate(9999, oneSample())
+   spanPerMat <- cbind(ltCorDT[, corSpan], spanPerMat)
+   traitPmat <- matrix(unlist(strsplit(ltCorDT[, traitPair], "\\."),
+     ncol = 2, byrow = TRUE)
+   pValDT <- data.table(x = factor(traitPmat[, 1], levels = allTraits),
+     y = factor(traitPmat[, 2], levels = allTraits),
+     p = apply(spanPerMat, 1, getPval))
+   pValDT <- pValDT[, trtPair := paste(x, y, sep = ".")]
+   corDT <- corDT[, trtPair := paste(sub("\\.P.", "", x), y, sep = ".")]
+   pValDT <- pValDT[corDT, on = "trtPair"]
+   pValDT <- pValDT[is.na(p), p := 1.0]
+   fwrite(pValDT, file = "corPvalIRRI.tsv", quote = FALSE, sep = "\t")
+ }
> pValDT <- pValDT[, i.x := factor(i.x, levels = paste(rep(allTraits, each = Ngrp),
+   rep(c("P1", "P2/P3", "P4"), times = d), sep = ".))]
> pValDT <- pValDT[, i.y := factor(i.y, levels = allTraits)]

```

Plot.

```

> pdfFlNam <- "traitCorIRRIp4.pdf"
> showtext_auto()
> ggplot(data = corDT, aes(x = x, y = y, fill = correlation)) +
+   geom_tile() +

```



```

+   scale_fill_gradient2(low = "royalblue4", high = "mediumvioletred",
+       mid = "white", midpoint = 0, limit = c(-1, 1)) +
+   geom_point(data = pValDT[grep("P2/P3", i.x), ],
+       aes(x = as.integer(i.x) - 2.0, y = i.y, color = p), size = 2) +
+   scale_color_gradient2(low = "#27015d", high = "#fbf9fd",
+       mid = "#6801f9", midpoint = 0.15, limit = c(0, 1)) +
+   scale_x_discrete(expand = c(0.04, 0.0)) +
+   scale_y_discrete(expand = c(0.05, 0.0)) +
+   geom_segment(data = corDT[grep("P4", x), ],
+       aes(x = as.integer(x) - 4.5, y = 0.5,
+           xend = as.integer(x) - 4.5, yend = as.integer(y) + 0.5),
+       color = "grey30", size = 0.75) +
+   geom_segment(data = corDT[grep("P1", x), ],
+       aes(x = as.integer(x) - 2.5, y = as.integer(y) + 0.5,
+           xend = max(as.integer(x)) + 0.5, yend = as.integer(y) + 0.5),
+       color = "grey30", size = 0.75) +
+   geom_segment(x = 1.5, y = 0.5, xend = d*Ngrp - 1.5, yend = 0.5,
+       color = "grey30", size = 0.75) +
+   geom_segment(x = d*Ngrp - 1.5, y = 0.5, xend = d*Ngrp - 1.5,
+       yend = d - 0.5, color = "grey30", size = 0.75) +
+   theme_minimal(base_size = 18, base_family = "myriad") +
+   theme(axis.title = element_blank(),
+       axis.ticks = element_blank(),
+       axis.text = element_blank(),
+       panel.grid.major = element_blank(),
+       legend.position = c(0.32, 0.67),
+       legend.direction = "horizontal",
+       legend.justification = c(1, 0)) +
+   geom_text(data = corDT[x == paste(y, "P2/P3", sep = "."), ],
+       aes(x = x, y = y, label = y),
+       hjust = 1.0, angle = -45, fontface = "bold", size = 5) +
+   guides(fill = guide_colorbar(barwidth = 9, barheight = 1,
+       title.position = "top", title.hjust = 0.5),
+       color = guide_colorbar(barwidth = 9, barheight = 1,
+       title.position = "top", title.hjust = 0.5))
> ggsave(pdfFlNam, width = 12, height = 10, units = "in",
+   device = "pdf", useDingbats = FALSE)
> cat("\\\\includegraphics[width = 0.95\\textwidth]{", pdfFlNam, "}\\n\\n", sep = "")

```

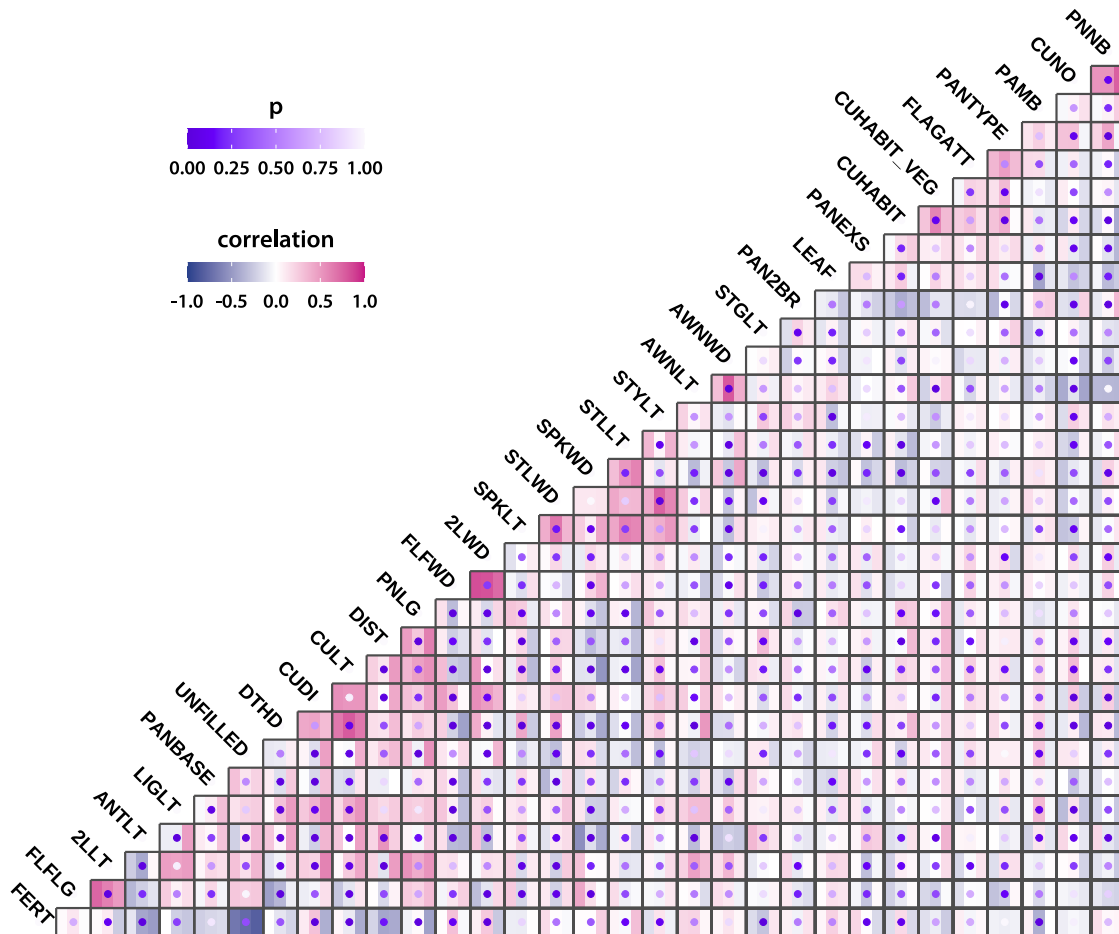

Identify trait pairs with the biggest among-group correlation variation.

```
> corPvalsP1 <- setorder(pValDT[group == "P1", ], p)
> corPvalsP1[p <= 0.001, ]
```

|     | x     | y        | p     | trtPair       | correlation | i.x      | i.y      | group |
|-----|-------|----------|-------|---------------|-------------|----------|----------|-------|
| 1:  | CUDI  | UNFILLED | 1e-04 | CUDI.UNFILLED | 0.05404256  | CUDI.P1  | UNFILLED | P1    |
| 2:  | PNLG  | UNFILLED | 1e-04 | PNLG.UNFILLED | 0.29123913  | PNLG.P1  | UNFILLED | P1    |
| 3:  | SPKLT | DTHD     | 2e-04 | SPKLT.DTHD    | -0.13359488 | SPKLT.P1 | DTHD     | P1    |
| 4:  | CULT  | ANTLT    | 3e-04 | CULT.ANTLT    | 0.27552526  | CULT.P1  | ANTLT    | P1    |
| 5:  | FLFWD | LIGLT    | 3e-04 | FLFWD.LIGLT   | 0.28709938  | FLFWD.P1 | LIGLT    | P1    |
| 6:  | FLFWD | DTHD     | 3e-04 | FLFWD.DTHD    | 0.23671012  | FLFWD.P1 | DTHD     | P1    |
| 7:  | CUDI  | FERT     | 6e-04 | CUDI.FERT     | 0.10307865  | CUDI.P1  | FERT     | P1    |
| 8:  | FLFWD | CULT     | 8e-04 | FLFWD.CULT    | 0.33117337  | FLFWD.P1 | CULT     | P1    |
| 9:  | LIGLT | ANTLT    | 9e-04 | LIGLT.ANTLT   | -0.08757841 | LIGLT.P1 | ANTLT    | P1    |
| 10: | SPKWD | ANTLT    | 9e-04 | SPKWD.ANTLT   | -0.55443839 | SPKWD.P1 | ANTLT    | P1    |

```
> corTraits <- unique(unlist(corPvalsP1[p <= 0.001, .(x, y)]))
> mhlTraits <- as.character(mhlDT[1:9, IRR1])
> sum(mhlTraits %in% corTraits)
```

```

[1] 4

> irriP4traits <- unique(c(corTraits, mhlTraits))
> length(mhlTraits)

[1] 9

> mhlTraits

[1] "CULT"      "UNFILLED" "AWNWD"      "2LLT"      "AWNLT"      "STLWD"      "ANTLT"
[8] "DIST"      "CUDI"

> length(corTraits)

[1] 11

> corTraits

[1] "CUDI"      "PNLG"      "SPKLT"      "CULT"      "FLFWD"      "LIGLT"      "SPKWD"
[8] "UNFILLED" "DTHD"      "ANTLT"      "FERT"

> length(irriP4traits)

[1] 16

> length(trtNamesNB)

[1] 32

> irriP4traits

[1] "CUDI"      "PNLG"      "SPKLT"      "CULT"      "FLFWD"      "LIGLT"      "SPKWD"
[8] "UNFILLED" "DTHD"      "ANTLT"      "FERT"      "AWNWD"      "2LLT"      "AWNLT"
[15] "STLWD"      "DIST"

> traitMat <- data.table(trait_acronym = sort(irriP4traits),
+                        top_by_value = ifelse(sort(irriP4traits) %in% mhlTraits, "X", ""),
+                        top_by_correlation =
+                        ifelse(sort(irriP4traits) %in% corTraits, "X", ""),
+                        union = rep("X", times = length(irriP4traits)))
> fwrite(traitMat, file = "traitSubsetsIRRI.tsv", sep = "\t", quote = FALSE)
> mhlDT <- mhlDT[, mhlD := round(mhlD, 4)]
> fwrite(mhlDT, file = "MahalanobisIRRI.tsv", sep = "\t", quote = FALSE)

```

Re-run mixture models with trait subsets, starting with  $N_G = 3$ , averaging among 20 runs.

```
> nReps <- 20
> Ngrp <- 3
> Ysc <- phenoAll[, lapply(.SD, scale), .SDcols = mhlTraits]
> names(Ysc) <- mhlTraits
> if (file.exists("ordIRRIImhlP3.Rdata")) {
+   load(file = "ordIRRIImhlP3.Rdata")
+ } else {
+   ordIRRIImhl <- replicate(nReps,
+     MuGaMix::quickFitModel(Ysc, mhlTraits, Ngrp, alpha0, nVBreps),
+     simplify = FALSE)
+   save(ordIRRIImhl, file = "ordIRRIImhlP3.Rdata")
+ }
> addCol <- function(repInd, grpInd, Ngrp, pList){
+   pMat[, grpInd] <- (pMat[, grpInd] +
+     pList[[repInd + 1]]$p[,
+       indList[[repInd]][bestInd[repInd]]])
+   indList[[repInd]] <- indList[[repInd]][-bestInd[repInd]]
+   return(NULL)
+ }
> indList <- lapply(2:nReps, function(i){1:Ngrp})
```

Anchor the first  $p$ -value matrix to the whole-data set groups.

```
> pMat <- ordIRRIImhl[[1]]$p
> sum(which(pMat[, 1] > 0.9) %in% newGrp[, which(newGrp23 == "P1")])
```

```
[1] 2
```

```
> sum(which(pMat[, 2] > 0.9) %in% newGrp[, which(newGrp23 == "P1")])
```

```
[1] 4
```

```
> sum(which(pMat[, 3] > 0.9) %in% newGrp[, which(newGrp23 == "P1")])
```

```
[1] 93
```

```
> sum(which(pMat[, 2] > 0.9) %in% newGrp[, which(newGrp23 == "P4")])
```

```
[1] 55
```

```
> pMat <- pMat[, c(3, 1, 2)]
```

Average posterior probabilities across replicates.

```

> # P1
> simList <- lapply(1:(nReps - 1), bestCollst,
+               ordIRRIImhl[-1], indList, pMat3[, 1], 0.9)
> bestInd <- unlist(lapply(simList, which.max))
> trash <- sapply(1:(nReps - 1), addCol, 1,
+               Ngrp, ordIRRIImhl)
> # P4
> simList <- lapply(1:(nReps - 1), bestCollst,
+               ordIRRIImhl[-1], indList, pMat3[, 3], 0.9)
> bestInd <- unlist(lapply(simList, which.max))
> trash <- sapply(1:(nReps - 1), addCol, 3,
+               Ngrp, ordIRRIImhl)
> # P2/P3
> bestInd <- rep(1, nReps - 1)
> trash <- sapply(1:(nReps - 1), addCol, 2,
+               Ngrp, ordIRRIImhl)
> pMat <- t(apply(pMat, 1, normalizeP))
> newGrp <- newGrp[, newGrp3mhl :=
+   sapply(apply(pMat, 1, which.max), function(i){c("P1", "P2", "P4")[i]}))]

```

Next, the correlation-switching traits only.

```

> Ysc <- phenoAll[, lapply(.SD, scale), .SDcols = corTraits]
> names(Ysc) <- corTraits
> if (file.exists("ordIRRIcorP3.Rdata")) {
+   load(file = "ordIRRIcorP3.Rdata")
+ } else {
+   ordIRRIcor <- replicate(nReps,
+               MuGaMix::quickFitModel(Ysc, corTraits, Ngrp, alpha0, nVBreps),
+               simplify = FALSE)
+   save(ordIRRIcor, file = "ordIRRIcorP3.Rdata")
+ }
> indList <- lapply(2:nReps, function(i){1:Ngrp})
> pMat <- ordIRRIcor[[1]]$p
> sum(which(pMat[, 1] > 0.9) %in% newGrp[, which(newGrp23 == "P1")])

```

```
[1] 1
```

```
> sum(which(pMat[, 2] > 0.9) %in% newGrp[, which(newGrp23 == "P1")])
```

```
[1] 76
```

```
> sum(which(pMat[, 3] > 0.9) %in% newGrp[, which(newGrp23 == "P1")])
```

```
[1] 20
```

```

> sum(which(pMat[, 2] > 0.9) %in% newGrp[, which(newGrp23 == "P4")])

[1] 9

> sum(which(pMat[, 1] > 0.9) %in% newGrp[, which(newGrp23 == "P4")])

[1] 41

> pMat <- pMat[, c(2, 3, 1)]
> # P1
> simList <- lapply(1:(nReps - 1), bestColLst,
+               ordIRRImc[-1], indList, pMat3[, 1], 0.9)
> bestInd <- unlist(lapply(simList, which.max))
> trash <- sapply(1:(nReps - 1), addCol, 1,
+               Ngrp, ordIRRImc)
> # P4
> simList <- lapply(1:(nReps - 1), bestColLst,
+               ordIRRImc[-1], indList, pMat3[, 3], 0.9)
> bestInd <- unlist(lapply(simList, which.max))
> trash <- sapply(1:(nReps - 1), addCol, 3,
+               Ngrp, ordIRRImc)
> # P2/P3
> bestInd <- rep(1, nReps - 1)
> trash <- sapply(1:(nReps - 1), addCol, 2,
+               Ngrp, ordIRRImc)
> pMat <- t(apply(pMat, 1, normalizeP))
> newGrp <- newGrp[, newGrp3cor :=
+   sapply(apply(pMat, 1, which.max), function(i){c("P1", "P2", "P4")[i]})]

```

Finally, the union of the two groups.

```

> Ysc <- phenoAll[, lapply(.SD, scale), .SDcols = irriP4traits]
> names(Ysc) <- irriP4traits
> if (file.exists("ordIRRImcP3.Rdata")) {
+   load(file = "ordIRRImcP3.Rdata")
+ } else {
+   ordIRRImc <- replicate(nReps,
+               MuGaMix::quickFitModel(Ysc, irriP4traits, Ngrp, alpha0, nVBreps),
+               simplify = FALSE)
+   save(ordIRRImc, file = "ordIRRImcP3.Rdata")
+ }
> indList <- lapply(2:nReps, function(i){1:Ngrp})
> pMat <- ordIRRImc[[1]]$p
> sum(which(pMat[, 1] > 0.9) %in% newGrp[, which(newGrp23 == "P1")])

[1] 0

```

```

> sum(which(pMat[, 2] > 0.9) %in% newGrp[, which(newGrp23 == "P1")])

[1] 6

> sum(which(pMat[, 3] > 0.9) %in% newGrp[, which(newGrp23 == "P1")])

[1] 99

> sum(which(pMat[, 2] > 0.9) %in% newGrp[, which(newGrp23 == "P4")])

[1] 56

> sum(which(pMat[, 1] > 0.9) %in% newGrp[, which(newGrp23 == "P4")])

[1] 0

> pMat <- pMat[, c(3, 1, 2)]
> # P1
> simList <- lapply(1:(nReps - 1), bestCollst,
+                 ordIRRIImc[-1], indList, pMat3[, 1], 0.9)
> bestInd <- unlist(lapply(simList, which.max))
> trash <- sapply(1:(nReps - 1), addCol, 1,
+               Ngrp, ordIRRIImc)
> # P4
> simList <- lapply(1:(nReps - 1), bestCollst,
+                 ordIRRIImc[-1], indList, pMat3[, 3], 0.9)
> bestInd <- unlist(lapply(simList, which.max))
> trash <- sapply(1:(nReps - 1), addCol, 3,
+               Ngrp, ordIRRIImc)
> # P2/P3
> bestInd <- rep(1, nReps - 1)
> trash <- sapply(1:(nReps - 1), addCol, 2,
+               Ngrp, ordIRRIImc)
> pMat <- t(apply(pMat, 1, normalizeP))
> newGrp <- newGrp[, newGrp3both :=
+   sapply(apply(pMat, 1, which.max), function(i){c("P1", "P2", "P4")[i]})]
> newGrp

  NSFTV_ID genPop probability Species genPopOr sspFixed genPopK8 newGrp4
1:  NID401    W4    0.5446 rufipogon    W4 0. rufipogon    W1    P4
2:  NID402    W4    1.0000 spontanea    W4  Oryza spp.    W4    P2
3:  NID403    W1    0.5682 rufipogon    W1 0. rufipogon    W1    P1
4:  NID404    W4    1.0000  nivara     W4  0. nivara     W4    P2
5:  NID405    W4    1.0000 spontanea    W4  0. nivara     W4    P4
---
```

|      |            |            |             |           |         |         |               |            |    |
|------|------------|------------|-------------|-----------|---------|---------|---------------|------------|----|
| 218: | NID755     | W1         | 0.9289      | rufipogon | W1      | 0.      | rufipogon     | W1         | P1 |
| 219: | NID757     | W4         | 0.6174      | nivara    | W4      | 0.      | nivara        | W8         | P4 |
| 220: | NID759     | W1         | 1.0000      | rufipogon | W1      | 0.      | rufipogon     | W1         | P1 |
| 221: | NID760     | W1         | 0.6082      | nivara    | W1      | 0.      | nivara        | W7         | P4 |
| 222: | NID762     | W4         | 0.8332      | nivara    | W4      | 0.      | nivara        | W8         | P4 |
|      | newGrp23   | grp4p      | newGrp3     | grp3p     | newGrp6 | newGrp8 | new_Oryza_spp | GRIN_spp   |    |
| 1:   | P4         | 0.9499856  | P1          | 0.5500570 | P4      | P3      | 0.            | rufipogon  | 0. |
| 2:   | P2/P3      | 0.9499904  | P2          | 0.4497224 | P6      | P8      | Oryza spp.    | Oryza spp. |    |
| 3:   | P1         | 1.0000000  | P1          | 0.9500000 | P1      | P1      | 0.            | rufipogon  | 0. |
| 4:   | P2/P3      | 0.6500000  | P1          | 0.6000032 | P2      | P8      | 0.            | nivara     | 0. |
| 5:   | P4         | 1.0000000  | P1          | 0.5500000 | P4      | P4      | Oryza spp.    | Oryza spp. |    |
| ---  |            |            |             |           |         |         |               |            |    |
| 218: | P1         | 1.0000000  | P1          | 0.9500000 | P1      | P5      | 0.            | rufipogon  | 0. |
| 219: | P4         | 0.9499198  | P1          | 0.5501289 | P4      | P5      | 0.            | nivara     | 0. |
| 220: | P1         | 1.0000000  | P1          | 0.9500000 | P1      | P1      | 0.            | rufipogon  | 0. |
| 221: | P4         | 1.0000000  | P1          | 0.5500000 | P4      | P4      | 0.            | nivara     | 0. |
| 222: | P4         | 0.9499996  | P1          | 0.5500007 | P4      | P4      | 0.            | nivara     | 0. |
|      | newGrp3mhl | newGrp3cor | newGrp3both |           |         |         |               |            |    |
| 1:   | P1         | P2         | P1          |           |         |         |               |            |    |
| 2:   | P1         | P2         | P1          |           |         |         |               |            |    |
| 3:   | P1         | P1         | P1          |           |         |         |               |            |    |
| 4:   | P1         | P2         | P1          |           |         |         |               |            |    |
| 5:   | P4         | P4         | P4          |           |         |         |               |            |    |
| ---  |            |            |             |           |         |         |               |            |    |
| 218: | P1         | P1         | P1          |           |         |         |               |            |    |
| 219: | P4         | P4         | P4          |           |         |         |               |            |    |
| 220: | P1         | P1         | P1          |           |         |         |               |            |    |
| 221: | P4         | P4         | P4          |           |         |         |               |            |    |
| 222: | P4         | P2         | P4          |           |         |         |               |            |    |

```

> pGrpSubsSan <- as.data.table(make_long(newGrp,
+                                     newGrp3mhl, newGrp3cor, newGrp3both, newGrp23))
> pGrpSubsSan <- pGrpSubsSan[,
+   node := factor(node, levels = c("P4", "P2/P3", "P2", "P1"))]
> pGrpSubsSan <- pGrpSubsSan[,
+   next_node := factor(next_node, levels = c("P4", "P2/P3", "P2", "P1"))]

```

Plot the relationships among subset groups.

```

> pdfFlNam <- "sankeyPGrpSubsIRRIP3.pdf"
> showtext_auto()
> ggplot(data = pGrpSubsSan, aes(x = x, next_x = next_x, node = node, next_node = next_node,
+   fill = node, label = node)) +
+   geom_sankey(flow.alpha = 0.6, node.color = "grey30") +
+   geom_sankey_label(size = 5, color = "grey20", fill = "grey90", alpha = 0.8) +
+   scale_fill_manual(values = pGrp8Colors) +
+   scale_x_discrete(labels = c("top by\nvalue\n9 traits", "top by\ncorrelation\n11 traits",
+   "value\n+ correlation\n16 traits", "all\ndata\n32 traits")) +

```



```

+   theme_sankey(base_size = 20, base_family = "myriad") +
+   theme(strip.background = element_rect(fill = "grey95", linetype = "blank"),
+         legend.position = "none") + labs(x = NULL)
> ggsave(pdfFlNam, width = 8, height = 6, units = "in",
+       device = "pdf", useDingbats = FALSE)
> cat("\\includegraphics[width=0.9\\textwidth]{", pdfFlNam, "}\n\n", sep = "")

```

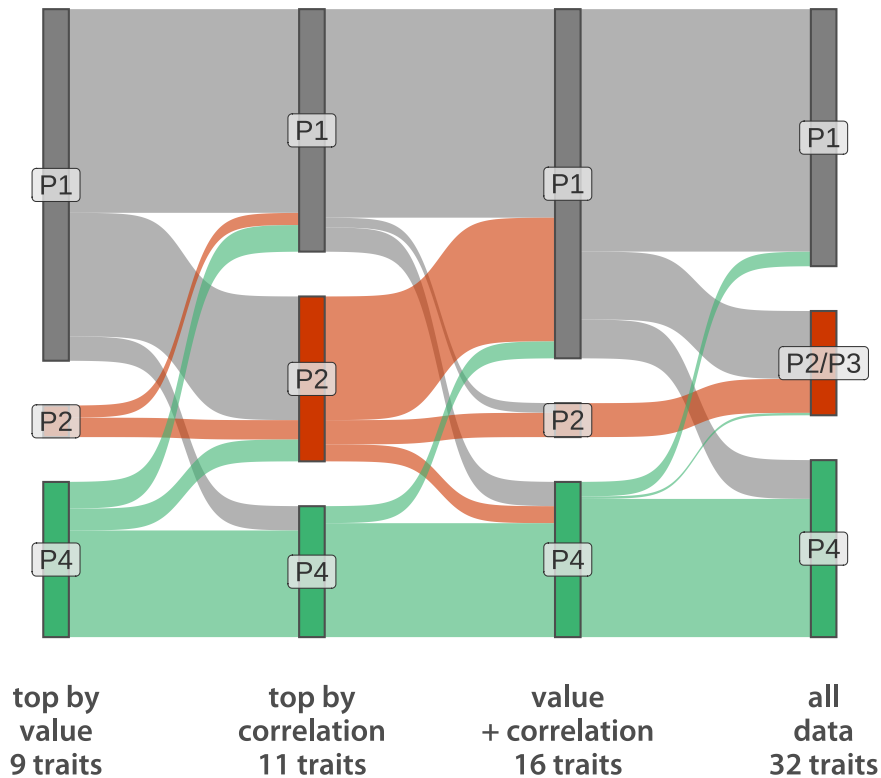

Re-run trait subsets with  $N_G = 4$ , again averaging among 20 runs.

```

> nReps <- 20
> Ngrp <- 4
> Ysc <- phenoAll[, lapply(.SD, scale), .SDcols = mhlTraits]
> names(Ysc) <- mhlTraits
> if (file.exists("ordIRRI_mhl.Rdata")) {
+   load(file = "ordIRRI_mhl.Rdata")
+ } else {
+   ordIRRI_mhl <- replicate(nReps,
+     MuGaMix::quickFitModel(Ysc, mhlTraits, Ngrp, alpha0, nVBreps),
+     simplify = FALSE)
+   save(ordIRRI_mhl, file = "ordIRRI_mhl.Rdata")
+ }
> indList <- lapply(2:nReps, function(i){1:Ngrp})

```

```

> pMat      <- ordIRRIImhl[[1]]$p[, c(3, 2, 4, 1)]
> # P1
> simList <- lapply(1:(nReps - 1), bestCollst,
+                 ordIRRIImhl[-1], indList, pMat3[, 1], 0.9)
> bestInd <- unlist(lapply(simList, which.max))
> trash    <- sapply(1:(nReps - 1), addCol, 1,
+                 Ngrp, ordIRRIImhl)
> # P4
> simList <- lapply(1:(nReps - 1), bestCollst,
+                 ordIRRIImhl[-1], indList, pMat3[, 3], 0.9)
> bestInd <- unlist(lapply(simList, which.max))
> trash    <- sapply(1:(nReps - 1), addCol, 4,
+                 Ngrp, ordIRRIImhl)
> # P2
> simList <- lapply(1:(nReps - 1), bestCollst,
+                 ordIRRIImhl[-1], indList, pMat3[, 2], 0.9)
> bestInd <- unlist(lapply(simList, which.max))
> trash    <- sapply(1:(nReps - 1), addCol, 2,
+                 Ngrp, ordIRRIImhl)
> # P3
> bestInd <- rep(1, nReps - 1)
> trash    <- sapply(1:(nReps - 1), addCol, 3,
+                 Ngrp, ordIRRIImhl)
> pMat      <- t(apply(pMat, 1, normalizeP))
> pMat      <- pMat[, c(1, 3, 2, 4)]
> newGrp    <- newGrp[, newGrp4mhl := paste0("P", apply(pMat, 1, which.max))]

```

Next, the correlation-switching traits only.

```

> Ysc      <- phenoAll[, lapply(.SD, scale), .SDcols = corTraits]
> names(Ysc) <- corTraits
> if (file.exists("ordIRRIcor.Rdata")) {
+   load(file = "ordIRRIcor.Rdata")
+ } else {
+   ordIRRIcor <- replicate(nReps,
+                           MuGaMix::quickFitModel(Ysc, corTraits, Ngrp, alpha0, nVBreps),
+                           simplify = FALSE)
+   save(ordIRRIcor, file = "ordIRRIcor.Rdata")
+ }
> indList <- lapply(2:nReps, function(i){1:Ngrp})
> pMat      <- ordIRRIcor[[1]]$p[, c(1, 2, 4, 3)]
> # P1
> simList <- lapply(1:(nReps - 1), bestCollst,
+                 ordIRRIcor[-1], indList, pMat3[, 1], 0.9)
> bestInd <- unlist(lapply(simList, which.max))
> trash    <- sapply(1:(nReps - 1), addCol, 1,

```

```

+           Ngrp, ordIRRIcor)
> # P4
> simList <- lapply(1:(nReps - 1), bestCollst,
+           ordIRRIcor[-1], indList, pMat3[, 3], 0.9)
> bestInd <- unlist(lapply(simList, which.max))
> trash <- sapply(1:(nReps - 1), addCol, 4,
+           Ngrp, ordIRRIcor)
> # P2
> simList <- lapply(1:(nReps - 1), bestCollst,
+           ordIRRIcor[-1], indList, pMat3[, 2], 0.9)
> bestInd <- unlist(lapply(simList, which.max))
> trash <- sapply(1:(nReps - 1), addCol, 2,
+           Ngrp, ordIRRIcor)
> # P3
> bestInd <- rep(1, nReps - 1)
> trash <- sapply(1:(nReps - 1), addCol, 3,
+           Ngrp, ordIRRIcor)
> pMat <- t(apply(pMat, 1, normalizeP))
> newGrp <- newGrp[, newGrp4cor := paste0("P", apply(pMat, 1, which.max))]

```

Finally, the union of the two groups.

```

> Ysc <- phenoAll[, lapply(.SD, scale), .SDcols = irriP4traits]
> names(Ysc) <- irriP4traits
> if (file.exists("ordIRRIImc.Rdata")) {
+   load(file = "ordIRRIImc.Rdata")
+ } else {
+   ordIRRIImc <- replicate(nReps,
+       MuGaMix::quickFitModel(Ysc, irriP4traits, Ngrp, alpha0, nVBreps),
+       simplify = FALSE)
+   save(ordIRRIImc, file = "ordIRRIImc.Rdata")
+ }
> indList <- lapply(2:nReps, function(i){1:Ngrp})
> pMat <- ordIRRIImc[[1]]$p[, c(2, 4, 3, 1)]
> # P1
> simList <- lapply(1:(nReps - 1), bestCollst,
+           ordIRRIImc[-1], indList, pMat3[, 1], 0.9)
> bestInd <- unlist(lapply(simList, which.max))
> trash <- sapply(1:(nReps - 1), addCol, 1,
+           Ngrp, ordIRRIImc)
> # P4
> simList <- lapply(1:(nReps - 1), bestCollst,
+           ordIRRIImc[-1], indList, pMat3[, 3], 0.9)
> bestInd <- unlist(lapply(simList, which.max))
> trash <- sapply(1:(nReps - 1), addCol, 4,
+           Ngrp, ordIRRIImc)

```

```

> # P2
> simList <- lapply(1:(nReps - 1), bestCollst,
+                 ordIRRIImc[-1], indList, pMat3[, 2], 0.9)
> bestInd <- unlist(lapply(simList, which.max))
> trash <- sapply(1:(nReps - 1), addCol, 2,
+               Ngrp, ordIRRIImc)
> # P3
> bestInd <- rep(1, nReps - 1)
> trash <- sapply(1:(nReps - 1), addCol, 3,
+               Ngrp, ordIRRIImc)
> pMat <- t(apply(pMat, 1, normalizeP))
> pMat <- pMat[, c(1, 3, 2, 4)]
> newGrp <- newGrp[, newGrp4both := paste0("P", apply(pMat, 1, which.max))]
> pGrpSubsSan <- as.data.table(make_long(newGrp,
+               newGrp4mhl, newGrp4cor, newGrp4both, newGrp23))
> pGrpSubsSan <- pGrpSubsSan[,
+   node := factor(node, levels = c("P4", "P2/P3", "P3", "P2", "P1"))]
> pGrpSubsSan <- pGrpSubsSan[,
+   next_node := factor(next_node, levels = c("P4", "P2/P3", "P3", "P2", "P1"))]

```

Plot the relationships among subset groups.

```

> pdfFlNam <- "sankeyPGrpSubsIRRI.pdf"
> showtext_auto()
> ggplot(data = pGrpSubsSan, aes(x = x, next_x = next_x, node = node, next_node = next_node,
+                               fill = node, label = node)) +
+   geom_sankey(flow.alpha = 0.6, node.color = "grey30") +
+   geom_sankey_label(size = 5, color = "grey20", fill = "grey90", alpha = 0.8) +
+   scale_fill_manual(values = pGrp8Colors) +
+   scale_x_discrete(labels = c("top by\nvalue\n9 traits", "top by\ncorrelation\n11 traits",
+                               "value\n+ correlation\n16 traits", "all\ndata\n32 traits")) +
+   theme_sankey(base_size = 20, base_family = "myriad") +
+   theme(strip.background = element_rect(fill = "grey95", linetype = "blank"),
+         legend.position = "none") + labs(x = NULL)
> ggsave(pdfFlNam, width = 8, height = 6, units = "in",
+       device = "pdf", useDingbats = FALSE)
> cat("\\\\includegraphics[width=0.9\\textwidth]{", pdfFlNam, "}\n\n", sep = "")

```

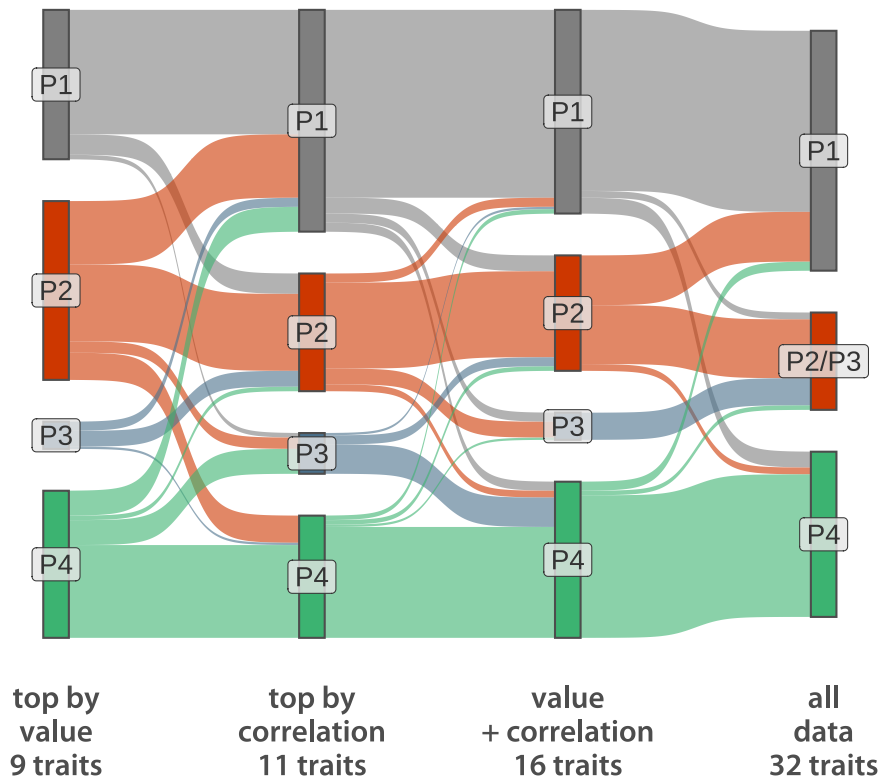

Re-create the genetic population plot with the subset groups,  $N_G = 3$  first.

```
> pGrpSan      <- as.data.table(ggsankey::make_long(newGrp, GRIN_spp,
+                                                newGrp3both, genPop))
> sankeyLevels <- c("0. nivara", "Oryza spp.", "0. rufipogon", c("P4", "P2", "P1"),
+                  paste0("W", c(5, 2, 4, 6, 1, 3)))
> pGrpSan      <- pGrpSan[, node := factor(node, levels = sankeyLevels)]
> pGrpSan      <- pGrpSan[, next_node := factor(next_node, levels = sankeyLevels)]
```

Plot.

```
> pdfFlNam <- "sankeyPGrpPopsIRRIsubsP3.pdf"
> showtext_auto()
> ggplot(data = pGrpSan, aes(x = x, next_x = next_x, node = node, next_node = next_node,
+                             fill = node, label = node)) +
+   geom_sankey(flow.alpha = 0.6, node.color = "grey30") +
+   geom_sankey_label(size = 5, color = "grey20", fill = "grey90", alpha = 0.8) +
+   scale_fill_manual(values = popGrpColors) +
+   scale_x_discrete(labels = c("species", "phenotypic\ngroups\n(16 traits)",
+                               "genetic\nsubpopulations")) +
+   theme_sankey(base_size = 20, base_family = "myriad") +
+   theme(strip.background = element_rect(fill = "grey95", linetype = "blank"),
```

```

+         legend.position = "none") + labs(x = NULL)
> ggsave(pdfFlNam, width = 8, height = 6, units = "in",
+         device = "pdf", useDingbats = FALSE)
> cat("\\\\includegraphics[width=0.9\\textwidth]{", pdfFlNam, "}\n\n", sep = "")

```

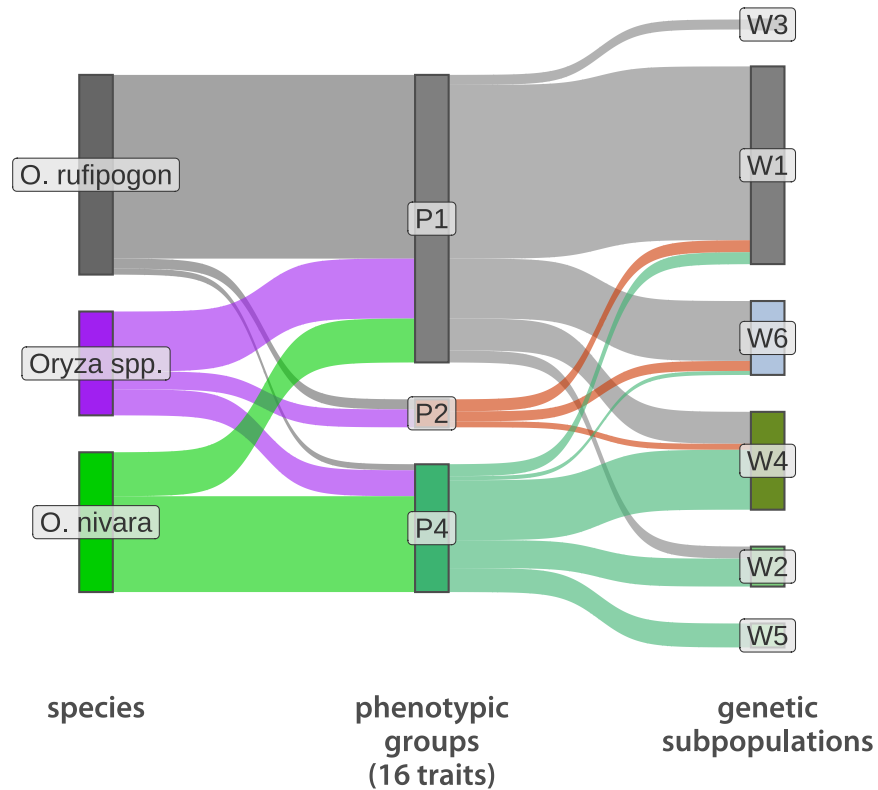

$N_G = 4$  next.

```

> pGrpSan      <- as.data.table(ggsankey::make_long(newGrp, GRIN_spp,
+                                                    newGrp4both, genPop))
> sankeyLevels <- c("O. nivara", "Oryza spp.", "O. rufipogon", c("P4", "P3", "P2", "P1"),
+                  paste0("W", c(5, 2, 4, 6, 1, 3)))
> pGrpSan      <- pGrpSan[, node := factor(node, levels = sankeyLevels)]
> pGrpSan      <- pGrpSan[, next_node := factor(next_node, levels = sankeyLevels)]

```

Plot.

```

> pdfFlNam <- "sankeyPGrpPopsIRRIsubs.pdf"
> showtext_auto()
> ggplot(data = pGrpSan, aes(x = x, next_x = next_x, node = node, next_node = next_node,
+                            fill = node, label = node)) +
+   geom_sankey(flow.alpha = 0.6, node.color = "grey30") +
+   geom_sankey_label(size = 5, color = "grey20", fill = "grey90", alpha = 0.8) +

```

```

+   scale_fill_manual(values = popGrpColors) +
+   scale_x_discrete(labels = c("species", "phenotypic\ngroups\n(16 traits)",
+                               "genetic\nsubpopulations")) +
+   theme_sankey(base_size = 20, base_family = "myriad") +
+   theme(strip.background = element_rect(fill = "grey95", linetype = "blank"),
+         legend.position = "none") + labs(x = NULL)
> ggsave(pdfFlNam, width = 8, height = 6, units = "in",
+       device = "pdf", useDingbats = FALSE)
> cat("\\\\includegraphics[width=0.9\\textwidth]{", pdfFlNam, "}\n\n", sep = "")

```

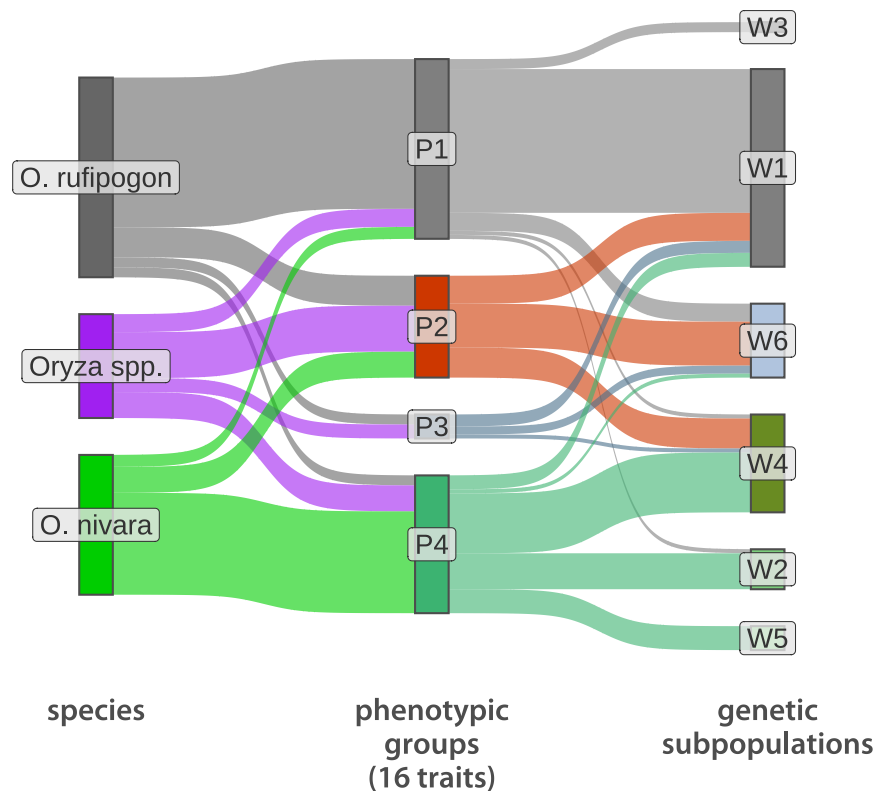

Extract *O. sativa* accessions into their own group.

```

> colSubset <- c("NSFTV_ID", "O_sativa")
> newGrp <- merge(newGrp, rfmix[, ..colSubset], by = "NSFTV_ID", all.x = TRUE)
> newGrp <- newGrp[, K6sat :=
+   ifelse(!is.na(O_sativa) & (O_sativa >= 0.5), "ADM/OSAT", genPop)]
> newGrp

```

|    | NSFTV_ID | genPop | probability | Species   | genPopOr | sspFixed     | genPopK8 | newGrp4 |
|----|----------|--------|-------------|-----------|----------|--------------|----------|---------|
| 1: | NID401   | W4     | 0.5446      | rufipogon | W4       | O. rufipogon | W1       | P4      |
| 2: | NID402   | W4     | 1.0000      | spontanea | W4       | Oryza spp.   | W4       | P2      |
| 3: | NID403   | W1     | 0.5682      | rufipogon | W1       | O. rufipogon | W1       | P1      |

|      |            |            |             |            |            |              |               |              |
|------|------------|------------|-------------|------------|------------|--------------|---------------|--------------|
| 4:   | NID404     | W4         | 1.0000      | nivara     | W4         | 0. nivara    | W4            | P2           |
| 5:   | NID405     | W4         | 1.0000      | spontanea  | W4         | 0. nivara    | W4            | P4           |
| ---  |            |            |             |            |            |              |               |              |
| 218: | NID755     | W1         | 0.9289      | rufipogon  | W1         | 0. rufipogon | W1            | P1           |
| 219: | NID757     | W4         | 0.6174      | nivara     | W4         | 0. nivara    | W8            | P4           |
| 220: | NID759     | W1         | 1.0000      | rufipogon  | W1         | 0. rufipogon | W1            | P1           |
| 221: | NID760     | W1         | 0.6082      | nivara     | W1         | 0. nivara    | W7            | P4           |
| 222: | NID762     | W4         | 0.8332      | nivara     | W4         | 0. nivara    | W8            | P4           |
|      | newGrp23   | grp4p      | newGrp3     | grp3p      | newGrp6    | newGrp8      | new_Oryza_spp | GRIN_spp     |
| 1:   | P4         | 0.9499856  | P1          | 0.5500570  | P4         | P3           | 0. rufipogon  | 0. rufipogon |
| 2:   | P2/P3      | 0.9499904  | P2          | 0.4497224  | P6         | P8           | Oryza spp.    | Oryza spp.   |
| 3:   | P1         | 1.0000000  | P1          | 0.9500000  | P1         | P1           | 0. rufipogon  | 0. rufipogon |
| 4:   | P2/P3      | 0.6500000  | P1          | 0.6000032  | P2         | P8           | 0. nivara     | 0. nivara    |
| 5:   | P4         | 1.0000000  | P1          | 0.5500000  | P4         | P4           | Oryza spp.    | Oryza spp.   |
| ---  |            |            |             |            |            |              |               |              |
| 218: | P1         | 1.0000000  | P1          | 0.9500000  | P1         | P5           | 0. rufipogon  | 0. rufipogon |
| 219: | P4         | 0.9499198  | P1          | 0.5501289  | P4         | P5           | 0. nivara     | 0. nivara    |
| 220: | P1         | 1.0000000  | P1          | 0.9500000  | P1         | P1           | 0. rufipogon  | 0. rufipogon |
| 221: | P4         | 1.0000000  | P1          | 0.5500000  | P4         | P4           | 0. nivara     | 0. nivara    |
| 222: | P4         | 0.9499996  | P1          | 0.5500007  | P4         | P4           | 0. nivara     | 0. nivara    |
|      | newGrp3mhl | newGrp3cor | newGrp3both | newGrp4mhl | newGrp4cor | newGrp4both  | 0_sativa      |              |
| 1:   | P1         | P2         | P1          | P2         | P4         | P2           | 0.31          |              |
| 2:   | P1         | P2         | P1          | P2         | P2         | P2           | 0.64          |              |
| 3:   | P1         | P1         | P1          | P2         | P1         | P1           | 0.51          |              |
| 4:   | P1         | P2         | P1          | P2         | P2         | P2           | 0.56          |              |
| 5:   | P4         | P4         | P4          | P4         | P4         | P4           | 0.19          |              |
| ---  |            |            |             |            |            |              |               |              |
| 218: | P1         | P1         | P1          | P1         | P1         | P1           | 0.02          |              |
| 219: | P4         | P4         | P4          | P4         | P3         | P4           | 0.60          |              |
| 220: | P1         | P1         | P1          | P2         | P1         | P1           | 0.41          |              |
| 221: | P4         | P4         | P4          | P4         | P4         | P4           | 0.01          |              |
| 222: | P4         | P2         | P4          | P4         | P4         | P4           | 0.28          |              |
|      | K6sat      |            |             |            |            |              |               |              |
| 1:   | W4         |            |             |            |            |              |               |              |
| 2:   | ADM/OSAT   |            |             |            |            |              |               |              |
| 3:   | ADM/OSAT   |            |             |            |            |              |               |              |
| 4:   | ADM/OSAT   |            |             |            |            |              |               |              |
| 5:   | W4         |            |             |            |            |              |               |              |
| ---  |            |            |             |            |            |              |               |              |
| 218: | W1         |            |             |            |            |              |               |              |
| 219: | ADM/OSAT   |            |             |            |            |              |               |              |
| 220: | W1         |            |             |            |            |              |               |              |
| 221: | W1         |            |             |            |            |              |               |              |
| 222: | W4         |            |             |            |            |              |               |              |

```

> pGrpSan      <- as.data.table(ggsankey::make_long(newGrp, GRIN_spp, newGrp23, K6sat))
> sankeyLevels <- c("0. nivara", "Oryza spp.", "0. rufipogon", c("P4", "P2/P3", "P1"),
+                   paste0("W", c(5, 2, 4)), "ADM/OSAT", paste0("W", c(6, 1, 3)))
> pGrpSan      <- pGrpSan[, node := factor(node, levels = sankeyLevels)]
> pGrpSan      <- pGrpSan[, next_node := factor(next_node, levels = sankeyLevels)]

```



Plot.

```
> pdfFlNam <- "sankeyPGrpPopsIRRIIsat.pdf"
> showtext_auto()
> ggplot(data = pGrpSan, aes(x = x, next_x = next_x, node = node, next_node = next_node,
+                             fill = node, label = node)) +
+   geom_sankey(flow.alpha = 0.6, node.color = "grey30") +
+   geom_sankey_label(size = 5, color = "grey20", fill = "grey90", alpha = 0.8,
+                     label = c(expression(italic("O. nivara")),
+                               expression(italic("Oryza spp.")),
+                               expression(italic("O. rufipogon")),
+                               "P4", "P2/P3", "P1",
+                               "W5", "W2", "W4", "ADM/OSAT", "W6", "W1", "W3")) +
+   scale_fill_manual(values = popGrpColors) +
+   scale_x_discrete(labels = c("species", "phenotypic\ngroups",
+                               "genetic\nsubpopulations")) +
+   theme_sankey(base_size = 20, base_family = "myriad") +
+   theme(strip.background = element_rect(fill = "grey95", linetype = "blank"),
+         legend.position = "none") + labs(x = NULL)
> ggsave(pdfFlNam, width = 8, height = 6, units = "in",
+         device = "pdf", useDingbats = FALSE)
> cat("\\\\includegraphics[width=0.9\\textwidth]{", pdfFlNam, "}\\n\\n", sep = "")
```

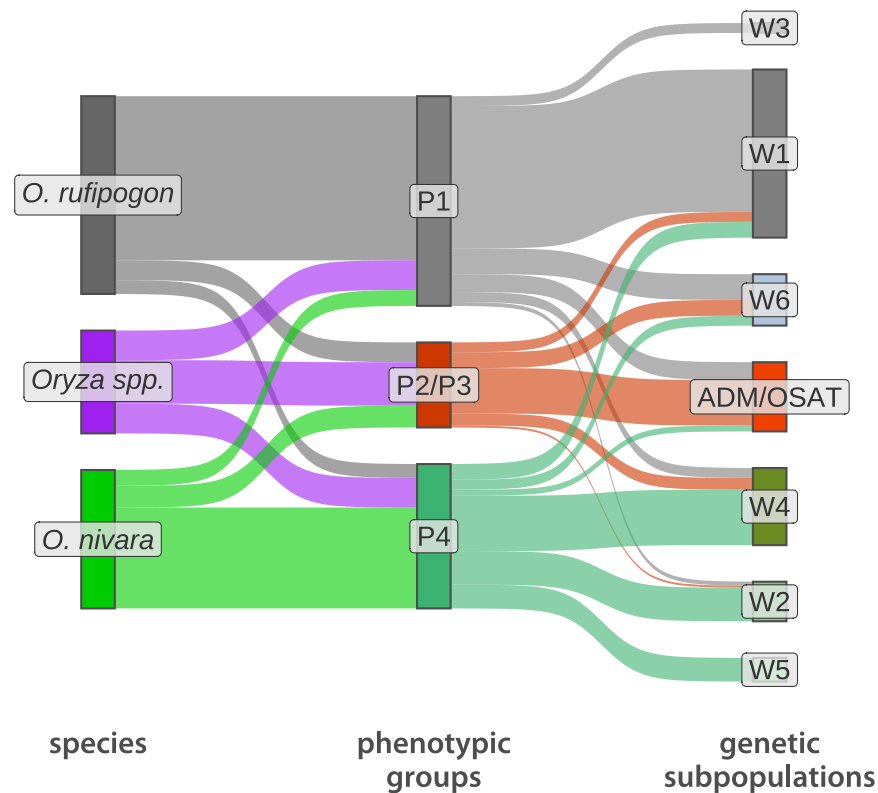

Fraction of accessions that are in the wrong P group.

```
> newGrp[(newGrp23 == "P1") &
+   (sspFixed == "O. nivara") &
+   (K6sat %in% c("W4", "W2")), .N]
```

```
[1] 4
```

```
> newGrp[(newGrp23 == "P4") &
+   (sspFixed == "O. rufipogon") &
+   (K6sat %in% c("W1", "W6")), .N]
```

```
[1] 9
```

```
> newGrp[(newGrp23 == "P1") &
+   (sspFixed == "O. nivara") &
+   (K6sat %in% c("W4", "W2")), .N]/newGrp[newGrp23 == "P1", .N]
```

```
[1] 0.03773585
```

```
> newGrp[(newGrp23 == "P4") &
+   (sspFixed == "O. rufipogon") &
+   (K6sat %in% c("W1", "W6")), .N]/newGrp[newGrp23 == "P4", .N]
```

```
[1] 0.1232877
```

Repeat for subset-based groups, starting with  $N_G = 3$ .

```
> pGrpSan      <- as.data.table(ggsankey::make_long(newGrp, GRIN_spp, newGrp3both, K6sat))
> sankeyLevels <- c("O. nivara", "Oryza spp.", "O. rufipogon", c("P4", "P2", "P1"),
+   paste0("W", c(5, 2, 4)), "ADM/OSAT", paste0("W", c(6, 1, 3)))
> pGrpSan      <- pGrpSan[, node := factor(node, levels = sankeyLevels)]
> pGrpSan      <- pGrpSan[, next_node := factor(next_node, levels = sankeyLevels)]
```

Plot.

```
> pdfFlNam <- "sankeyPGrpPopsIRRIIsatSubsP3.pdf"
> showtext_auto()
> ggplot(data = pGrpSan, aes(x = x, next_x = next_x, node = node, next_node = next_node,
+   fill = node, label = node)) +
+   geom_sankey(flow.alpha = 0.6, node.color = "grey30") +
+   geom_sankey_label(size = 5, color = "grey20", fill = "grey90", alpha = 0.8,
+   label = c(expression(italic("O. nivara")),
+   expression(italic("Oryza spp.")),
+   expression(italic("O. rufipogon")),
+   "P4", "P2", "P1",
```

```

+           "W5", "W2", "W4", "ADM/OSAT", "W6", "W1", "W3")) +
+   scale_fill_manual(values = popGrpColors) +
+   scale_x_discrete(labels = c("species", "phenotypic\ngroups\n(16 traits)",
+                               "genetic\nsubpopulations")) +
+   theme_sankey(base_size = 20, base_family = "myriad") +
+   theme(strip.background = element_rect(fill = "grey95", linetype = "blank"),
+         legend.position = "none") + labs(x = NULL)
> ggsave(pdfFlNam, width = 8, height = 6, units = "in",
+       device = "pdf", useDingbats = FALSE)
> cat("\\\\includegraphics[width=0.9\\textwidth]{", pdfFlNam, "}\n\n", sep = "")

```

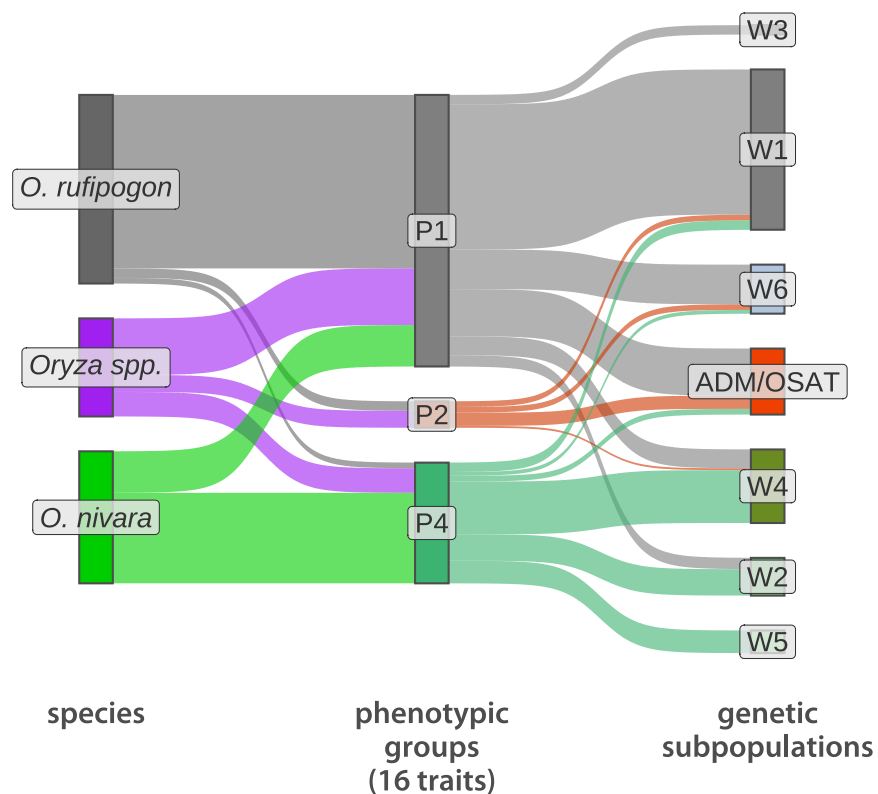

Correlation only traits next.

```

> pGrpSan <- as.data.table(ggsankey::make_long(newGrp, GRIN_spp, newGrp3cor, K6sat))
> sankeyLevels <- c("O. nivara", "Oryza spp.", "O. rufipogon", c("P4", "P2", "P1"),
+                   paste0("W", c(5, 2, 4)), "ADM/OSAT", paste0("W", c(6, 1, 3)))
> pGrpSan <- pGrpSan[, node := factor(node, levels = sankeyLevels)]
> pGrpSan <- pGrpSan[, next_node := factor(next_node, levels = sankeyLevels)]

```

Plot.

```

> pdfFlNam <- "sankeyPGrpPopsIRRIIsatSubsP3cor.pdf"
> showtext_auto()

```

```

> ggplot(data = pGrpSan, aes(x = x, next_x = next_x, node = node, next_node = next_node,
+                             fill = node, label = node)) +
+   geom_sankey(flow.alpha = 0.6, node.color = "grey30") +
+   geom_sankey_label(size = 5, color = "grey20", fill = "grey90", alpha = 0.8,
+                     label = c(expression(italic("O. nivara")),
+                               expression(italic("Oryza spp.")),
+                               expression(italic("O. rufipogon")),
+                               "P4", "P2", "P1",
+                               "W5", "W2", "W4", "ADM/OSAT", "W6", "W1", "W3")) +
+   scale_fill_manual(values = popGrpColors) +
+   scale_x_discrete(labels = c("species", "phenotypic\ngroups\n(11 traits)",
+                               "genetic\nsubpopulations")) +
+   theme_sankey(base_size = 20, base_family = "myriad") +
+   theme(strip.background = element_rect(fill = "grey95", linetype = "blank"),
+         legend.position = "none") + labs(x = NULL)
> ggsave(pdfFlNam, width = 8, height = 6, units = "in",
+         device = "pdf", useDingbats = FALSE)
> cat("\\\\includegraphics[width=0.9\\textwidth]{", pdfFlNam, "}\\n\\n", sep = "")

```

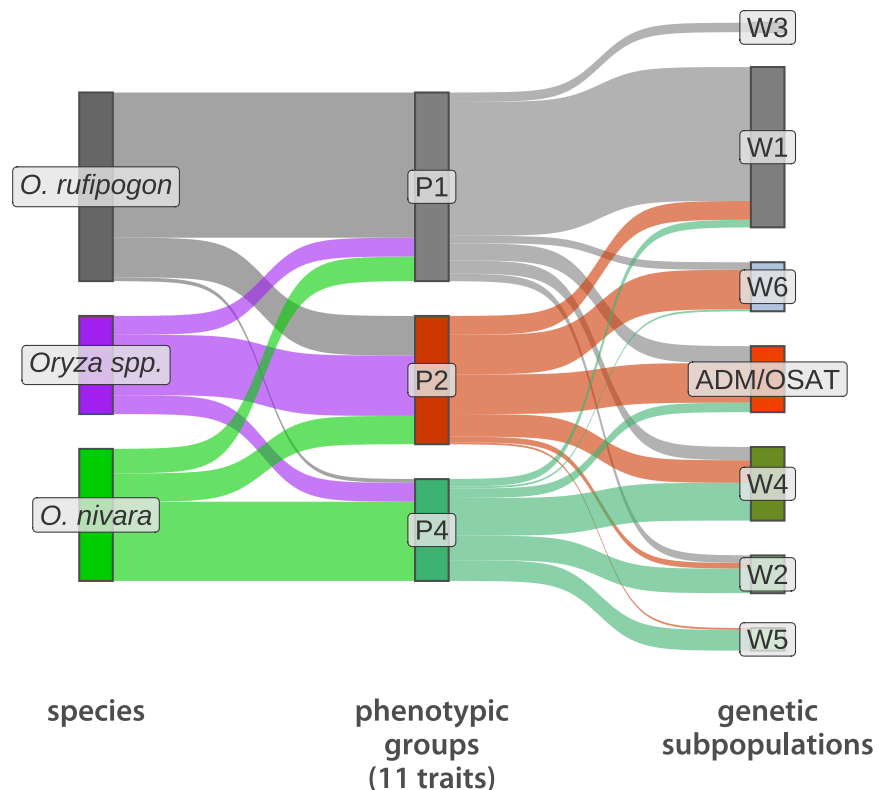

Finally,  $N_G = 4$ .

```

> pGrpSan <- as.data.table(ggsankey::make_long(newGrp, GRIN_spp, newGrp4both, K6sat))

```

```
> sankeyLevels <- c("O. nivara", "Oryza spp.", "O. rufipogon", c("P4", "P2", "P3", "P1"),
+                   paste0("W", c(5, 2, 4)), "ADM/OSAT", paste0("W", c(6, 1, 3)))
> pGrpSan      <- pGrpSan[, node := factor(node, levels = sankeyLevels)]
> pGrpSan      <- pGrpSan[, next_node := factor(next_node, levels = sankeyLevels)]
```

Plot.

```
> pdfFlNam <- "sankeyPGrpPopsIRRIIsatSubs.pdf"
> showtext_auto()
> ggplot(data = pGrpSan, aes(x = x, next_x = next_x, node = node, next_node = next_node,
+                             fill = node, label = node)) +
+   geom_sankey(flow.alpha = 0.6, node.color = "grey30") +
+   geom_sankey_label(size = 5, color = "grey20", fill = "grey90", alpha = 0.8,
+                     label = c(expression(italic("O. nivara")),
+                               expression(italic("Oryza spp.")),
+                               expression(italic("O. rufipogon")),
+                               "P4", "P2", "P3", "P1",
+                               "W5", "W2", "W4", "ADM/OSAT", "W6", "W1", "W3")) +
+   scale_fill_manual(values = popGrpColors) +
+   scale_x_discrete(labels = c("species", "phenotypic\ngroups\n(16 traits)",
+                               "genetic\nsubpopulations")) +
+   theme_sankey(base_size = 20, base_family = "myriad") +
+   theme(strip.background = element_rect(fill = "grey95", linetype = "blank"),
+         legend.position = "none") + labs(x = NULL)
> ggsave(pdfFlNam, width = 8, height = 6, units = "in",
+         device = "pdf", useDingbats = FALSE)
> cat("\\\\includegraphics[width=0.9\\textwidth]{", pdfFlNam, "}\n\n", sep = "")
```



```
> levels(sppGrp$species) <- c("O. rufipogon", "O. nivara",
+                             "Oryza spp.", "O. sativa")
> sppGrp <- sppGrp[, group := pvDT$group]
> setkey(sppGrp, NSFTV_ID, group)
> setkey(pvDT, accession, group)
> sppGrp <- sppGrp[pvDT]
```

I want to first sort by phenotypic group (lumping P2 and P3 together), and then within each group by species, putting *Oryza spp.* last in P1 and first in P4.

```
> sumP <- matrix(sppGrp$i.p, ncol = 4, byrow = TRUE)
> sumP <- cbind(sumP[, 1],
+               rowSums(sumP[, 2:3]),
+               sumP[, 4])
> sppGrp <- sppGrp[, maxP := rep(apply(sumP, 1, max), each = 4)]
> sppGrp <- sppGrp[maxP >= 0.8, ]
> sppGrp <- sppGrp[, NSFTV_ID := factor(NSFTV_ID,
+                                       levels = unique(NSFTV_ID))]
> sppGrp <- sppGrp[, orderVar1 := rep(tapply(i.p, NSFTV_ID, which.max), each = 4)]
> sppGrp <- sppGrp[, orderVar1 :=
+               ifelse(GRIN_spp == "Oryza spp.", orderVar1 + 0.5, orderVar1)]
> sppGrp <- sppGrp[, orderVar1 := ifelse(orderVar1 == 4.5, 3.5, orderVar1)]
```

Finally, within each species in a phenotypic group, I want to sort accessions by increasing *O. sativa* genome fraction in P1 and P2/P3, and decreasing fraction in P4.

```
> sppGrp <- sppGrp[, orderVar2 := ifelse(orderVar1 <= 2.5, 0_sativa, 1.0 - 0_sativa)]
> setorderv(sppGrp, cols = c("orderVar1", "orderVar2"), order = c(1, 1))
> sppGrp <- sppGrp[, NSFTV_ID := factor(NSFTV_ID,
+                                     levels = unique(NSFTV_ID))]
> p1range <- range(sppGrp[group == "P1", which(i.p >= 0.8)])
> p4range <- range(sppGrp[group == "P4", which(i.p >= 0.8)])
> p23range <- range(sppGrp[group == "P2", which(i.p >= 0.8)])
> sppGrpCol <- c("0. sativa" = "orangered2", "0. rufipogon" = "grey40",
+               "0. nivara" = "green3", "Oryza spp." = "purple")
```

Plot the sorted data.

```
> pdfFlNam <- "structSpp0sat.pdf"
> showtext_auto()
> ggplot(data = sppGrp, aes(x = NSFTV_ID, y = p, fill = species)) +
+   geom_col() +
+   scale_fill_manual(values = sppGrpCol,
+     labels = c(expression(italic("O. sativa")),
+       expression(italic("O. rufipogon")),
+       expression(italic("O. nivara")),
+       expression(italic("Oryza spp.")))) +
```

```

+   geom_rect(aes(xmin = p1range[1], xmax = p1range[2],
+                 ymin = -0.03, ymax = -0.01), fill = pGrp8Colors["P1"]) +
+   geom_text(aes(x = mean(p1range), y = -0.05), label = "P1",
+             size = 5, family = "myriad") +
+   geom_rect(aes(xmin = p4range[1], xmax = p4range[2],
+                 ymin = -0.03, ymax = -0.01), fill = pGrp8Colors["P4"]) +
+   geom_text(aes(x = mean(p4range), y = -0.05), label = "P4",
+             size = 5, family = "myriad") +
+   geom_rect(aes(xmin = p23range[1], xmax = p23range[2],
+                 ymin = -0.03, ymax = -0.01), fill = pGrp8Colors["P2/P3"]) +
+   geom_text(aes(x = mean(p23range), y = -0.05), label = "P2/P3",
+             size = 5, family = "myriad") +
+   theme_classic(base_size = 18, base_family = "myriad") +
+   theme(axis.line = element_blank(), axis.text.x = element_blank(),
+         axis.ticks.x = element_blank(), legend.text.align = 0) +
+   xlab("accessions")
> ggsave(pdfFlNam, width = 8, height = 6, units = "in",
+       device = "pdf", useDingbats = FALSE)
> cat("\\\\includegraphics[width = 0.95\\textwidth]{", pdfFlNam, "}"\\n\\n", sep = "")

```

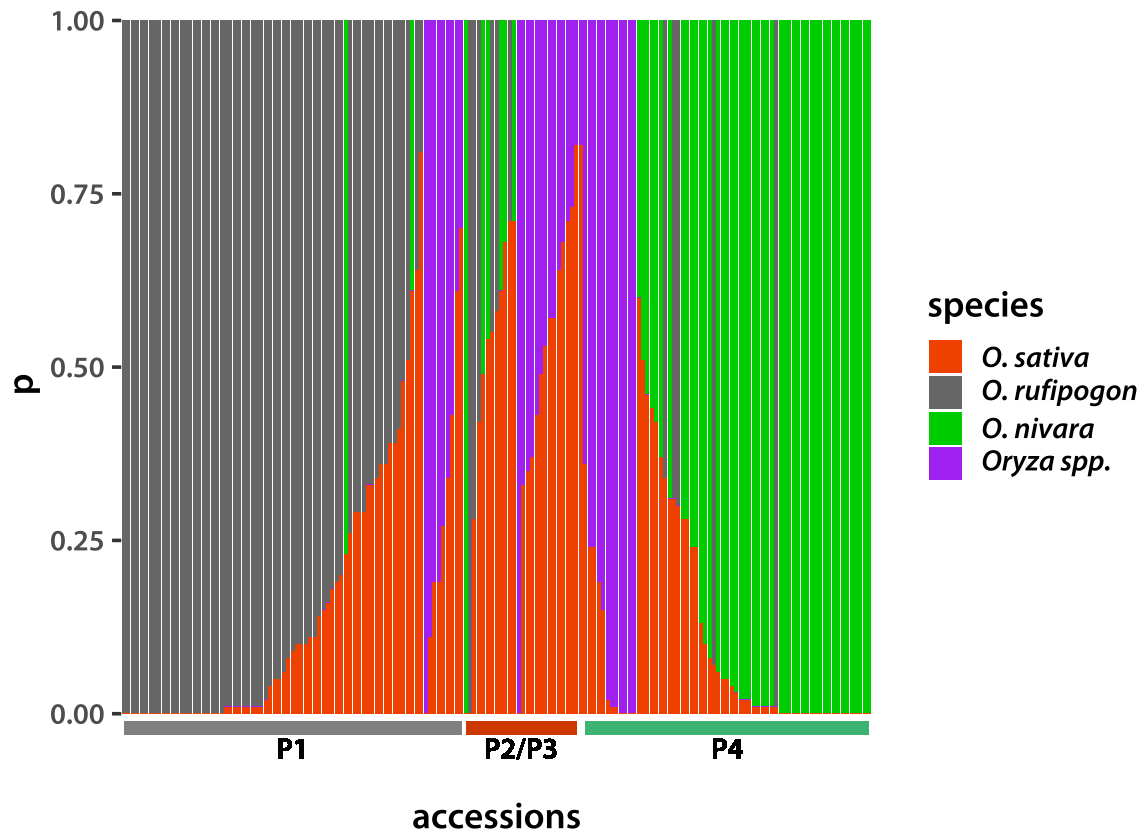



## 5 Cornell and Dale Bumpers data

I next add the Cornell and Dale Bumpers data. Start by reading the accession means.

```
> dbPheno <- fread("./LNmodeDB.tsv")
> cuPheno <- fread("./LNmodeCU.tsv")
```

### 5.1 Dale Bumpers data groups

I re-estimate group IDs averaging  $p$ -values from 20 runs as before for IRRI data.

```
> trtNamesDB <- names(dbPheno)[-1]
> trtNamesDB <- trtNamesDB[trtNamesDB != "HULGRSURFAR"]
> Ysc <- dbPheno[, lapply(.SD, scale), .SDcols = trtNamesDB]
> Ngrp <- 3
> nReps <- 20
> names(Ysc) <- trtNamesDB
> if (file.exists("ordDBp3.Rdata")) {
+   load(file = "ordDBp3.Rdata")
+ } else {
+   ordDB <- replicate(nReps,
+     MuGaMix::quickFitModel(Ysc, trtNamesDB, Ngrp, alpha0, nVBreps),
+     simplify = FALSE)
+   save(ordDB, file = "ordDBp3.Rdata")
+ }
> pMat3db <- pMat3[phenoAll$NSFTV_ID %in% dbPheno$NSFTV_ID, ]
> pMat <- ordDB[[1]]$p
> pMat1 <- pMat[dbPheno$NSFTV_ID %in% phenoAll$NSFTV_ID, ]
> sum(which(pMat1[, 1] > 0.9) %in% which(pMat3db[, 1] > 0.6))

[1] 19

> sum(which(pMat1[, 1] > 0.9) %in% which(pMat3db[, 3] > 0.6))

[1] 15

> sum(which(pMat1[, 2] > 0.9) %in% which(pMat3db[, 1] > 0.6))

[1] 1

> sum(which(pMat1[, 2] > 0.9) %in% which(pMat3db[, 3] > 0.6))

[1] 0

> sum(which(pMat1[, 3] > 0.9) %in% which(pMat3db[, 1] > 0.6))
```

```
[1] 15
```

```
> sum(which(pMat1[, 3] > 0.9) %in% which(pMat3db[, 3] > 0.6))
```

```
[1] 29
```

```
> indList <- lapply(2:nReps, function(i){1:Ngrp})
> # P1
> simList <- lapply(1:(nReps - 1), bestColLst,
+               ordDB[-1], indList, pMat[, 1], 0.6)
> bestInd <- unlist(lapply(simList, which.max))
> trash    <- sapply(1:(nReps - 1), addCol, 1,
+               Ngrp, ordDB)
> # P4
> simList <- lapply(1:(nReps - 1), bestColLst,
+               ordDB[-1], indList, pMat[, 3], 0.6)
> bestInd <- unlist(lapply(simList, which.max))
> trash    <- sapply(1:(nReps - 1), addCol, 3,
+               Ngrp, ordDB)
> # P2
> bestInd <- rep(1, nReps - 1)
> trash    <- sapply(1:(nReps - 1), addCol, 2,
+               Ngrp, ordDB)
> pMat     <- t(apply(pMat, 1, normalizeP))
```

Relate the trait groups ascertained from Dale Bumpers and Cornell data to the IRRI groups.

```
> dbPCP <- data.table(NSFTV_ID = dbPheno[, NSFTV_ID],
+               db3 = paste0("P", apply(pMat, 1, which.max)))
> dbPCP <- dbPCP[, db3 := ifelse(db3 == "P3", "P4", db3)]
> dbPCP <- dbPCP[newGrp[, .(NSFTV_ID, newGrp23, newGrp4both, GRIN_spp)],
+               on = "NSFTV_ID", nomatch = 0]
```

Repeat with Cornell data.

```
> trtNamesCU <- names(cuPheno)[-1]
> Ysc    <- cuPheno[, lapply(.SD, scale), .SDcols = trtNamesCU]
> nReps <- 20
> names(Ysc) <- trtNamesCU
> if (file.exists("ordCU3.Rdata")) {
+   load(file = "ordCU3.Rdata")
+ } else {
+   ordCU <- replicate(nReps,
+               MuGaMix::quickFitModel(Ysc, trtNamesCU, Ngrp, alpha0, nVBreps),
+               simplify = FALSE)
```

```

+   save(ordCU, file = "ordCUUp3.Rdata")
+ }
> pMat3cu <- pMat3[phenoAll$NSFTV_ID %in% cuPheno$NSFTV_ID, ]
> pMat     <- ordCU[[1]]$p
> pMat1    <- pMat[cuPheno$NSFTV_ID %in% phenoAll$NSFTV_ID, ]
> sum(which(pMat1[, 1] > 0.9) %in% which(pMat3cu[, 1] > 0.6))

[1] 8

> sum(which(pMat1[, 1] > 0.9) %in% which(pMat3cu[, 3] > 0.6))

[1] 30

> sum(which(pMat1[, 2] > 0.9) %in% which(pMat3cu[, 1] > 0.6))

[1] 6

> sum(which(pMat1[, 2] > 0.9) %in% which(pMat3cu[, 3] > 0.6))

[1] 0

> sum(which(pMat1[, 3] > 0.9) %in% which(pMat3cu[, 1] > 0.6))

[1] 14

> sum(which(pMat1[, 3] > 0.9) %in% which(pMat3cu[, 3] > 0.6))

[1] 6

> pMat     <- pMat[, 3:1]
> indList  <- lapply(2:nReps, function(i){1:Ngrp})
> # P1
> simList  <- lapply(1:(nReps - 1), bestColLst,
+               ordCU[-1], indList, pMat[, 1], 0.6)
> bestInd  <- unlist(lapply(simList, which.max))
> trash    <- sapply(1:(nReps - 1), addCol, 1,
+               Ngrp, ordCU)
> # P4
> simList  <- lapply(1:(nReps - 1), bestColLst,
+               ordCU[-1], indList, pMat[, 3], 0.6)
> bestInd  <- unlist(lapply(simList, which.max))
> trash    <- sapply(1:(nReps - 1), addCol, 3,
+               Ngrp, ordCU)

```

```

> # P2
> bestInd <- rep(1, nReps - 1)
> trash    <- sapply(1:(nReps - 1), addCol, 2,
+                  Ngrp, ordCU)
> pMat     <- t(apply(pMat, 1, normalizeP))
> cuPCP    <- data.table(NSFTV_ID = cuPheno[, NSFTV_ID],
+                        cu3 = paste0("P", apply(pMat, 1, which.max)))
> cuPCP    <- cuPCP[, cu3 := ifelse(cu3 == "P3", "P4", cu3)]
> cuPCP    <- cuPCP[newGrp[, .(NSFTV_ID, newGrp23, newGrp4both, GRIN_spp)],
+                  on = "NSFTV_ID", nomatch = 0]

```

Finally, I compare groups determined from the Dale Bumpers and Cornell data with the IRRI groups and species.

```

> bothPCP <- dbPCP[cuPCP[, .(NSFTV_ID, cu3)], on = "NSFTV_ID", nomatch = 0]

```

Plot  $N_G = 3$  first.

```

> pGrpSan    <- as.data.table(make_long(bothPCP, GRIN_spp, db3, cu3, newGrp23))
> sankeyLevels0 <- c("O. nivara", "Oryza spp.", "O. rufipogon",
+                  c("P4", "P3", "P2/P3", "P2", "P1"))
> pGrpSan    <- pGrpSan[, node := factor(node, levels = sankeyLevels0)]
> pGrpSan    <- pGrpSan[, next_node := factor(next_node, levels = sankeyLevels0)]

```

Plot.

```

> pdfFlNam <- "sankeyPGrpCUDbP3.pdf"
> showtext_auto()
> ggplot(data = pGrpSan, aes(x = x, next_x = next_x, node = node, next_node = next_node,
+                            fill = node, label = node)) +
+   geom_sankey(flow.alpha = 0.6, node.color = "grey30") +
+   geom_sankey_label(size = 5, color = "grey20", fill = "grey90", alpha = 0.8,
+                     label = c(expression(italic("O. nivara")),
+                               expression(italic("Oryza spp.")),
+                               expression(italic("O. rufipogon")),
+                               "P4", "P2", "P1", "P4", "P2", "P1",
+                               "P4", "P2/P3", "P1")) +
+   scale_fill_manual(values = pGrp8Colors) +
+   scale_x_discrete(labels = c("species", "Dale\nBumpers",
+                               "Cornell", "IRRI\nall traits")) +
+   theme_sankey(base_size = 20, base_family = "myriad") +
+   theme(strip.background = element_rect(fill = "grey95", linetype = "blank"),
+         legend.position = "none", axis.title = element_blank())
> ggsave(pdfFlNam, width = 8, height = 6, units = "in",
+         device = "pdf", useDingbats = FALSE)
> cat("\\\\includegraphics[width=0.9\\textwidth]{", pdfFlNam, "}\\n\\n", sep = "")

```

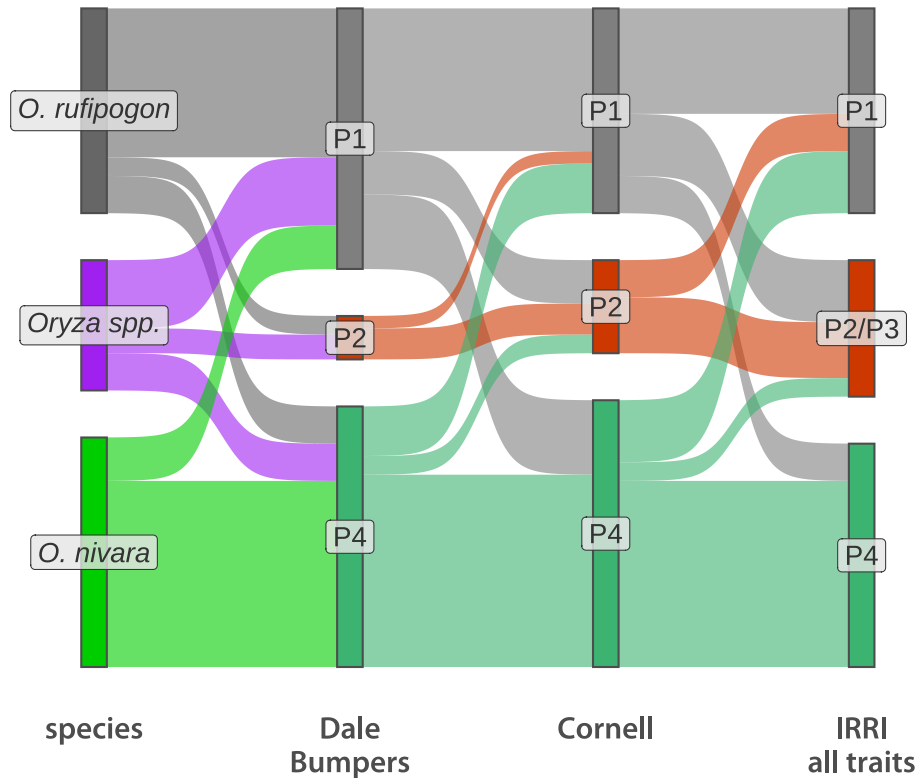

## 5.2 Cross-location correlations

I start by looking at correlations between values of the same traits measured at multiple locations.

```
> commonTraits <- c("CULM_ANGLE", "CUNO", "DTHD", "FLFLG",
+                  "FLFLWD", "FLFLWD", "PNLG", "PNNB", "PHTT", "CULT")
> trtNamesUnion <- sort(c(paste(trtNamesDB, "DB", sep = "."),
+                             paste(trtNamesCU, "CU", sep = "."),
+                             paste(trtNamesNB, "IRRI", sep = ".")))
> trtNamesUnion <- trtNamesUnion[grep(paste(commonTraits, collapse = "|"),
+                                     trtNamesUnion)]
> trtNamesUnion <- c("CUHABIT.IRRI",
+                   sort(c(trtNamesUnion[-grep("CULT|FLFLWD|FLFLWD", trtNamesUnion)],
+                         "FLFLWD.DB", "FLFLWD.IRRI")),
+                   c("CULT.IRRI", "PBRNB.DB", "PANBASE.IRRI",
+                     "SEED_S2_BAG.CU", "SEED_S2_NONBAG.CU",
+                     "UNFILGRNB.DB", "UNFILLED.IRRI", "FERT.IRRI",
+                     "SPKWD.IRRI", "HULGRWD.DB", "SPKLT.IRRI", "HULGRLG.DB",
+                     "HULGRVOL.DB",
+                     "AWNPLU.CU", "AWNPLU.DB", "AWNWD.IRRI", "AWNLT.IRRI"))
> trtNamesUnion
```

|      |                  |                     |                 |                 |
|------|------------------|---------------------|-----------------|-----------------|
| [1]  | "CUHABIT.IRRI"   | "CULM_ANGLE.CU"     | "CULM_ANGLE.DB" | "CUNO.CU"       |
| [5]  | "CUNO.IRRI"      | "DTHD.CU"           | "DTHD.DB"       | "DTHD.IRRI"     |
| [9]  | "FLFLG.CU"       | "FLFLG.DB"          | "FLFLG.IRRI"    | "FLFLWD.DB"     |
| [13] | "FLFWD.IRRI"     | "PNLG.CU"           | "PNLG.DB"       | "PNLG.IRRI"     |
| [17] | "PNNB.CU"        | "PNNB.DB"           | "PNNB.IRRI"     | "PTHT.CU"       |
| [21] | "PTHT.DB"        | "CULT.IRRI"         | "PBRNB.DB"      | "PANBASE.IRRI"  |
| [25] | "SEED_S2_BAG.CU" | "SEED_S2_NONBAG.CU" | "UNFILGRNB.DB"  | "UNFILLED.IRRI" |
| [29] | "FERT.IRRI"      | "SPKWD.IRRI"        | "HULGRWD.DB"    | "SPKLT.IRRI"    |
| [33] | "HULGRLG.DB"     | "HULGRVOL.DB"       | "AWNPLU.CU"     | "AWNPLU.DB"     |
| [37] | "AWNWD.IRRI"     | "AWNLT.IRRI"        |                 |                 |

```
> irriCTnames <- sapply(strsplit(trtNamesUnion[grepl("\\.IRRI", trtNamesUnion)],
+                             "\\."), `[, 1]`
> irriCTnames <- c("NSFTV_ID", irriCTnames)
> dbCTnames <- sapply(strsplit(trtNamesUnion[grepl("\\.DB", trtNamesUnion)],
+                             "\\."), `[, 1]`
> dbCTnames <- c("NSFTV_ID", dbCTnames)
> cuCTnames <- sapply(strsplit(trtNamesUnion[grepl("\\.CU", trtNamesUnion)],
+                             "\\."), `[, 1]`
> cuCTnames <- c("NSFTV_ID", cuCTnames)
```

Put the relevant traits together in one data.table.

```
> ctDT <- merge(phenoAll[, ..irriCTnames], dbPheno[, ..dbCTnames],
+               by = "NSFTV_ID", all.x = FALSE, all.y = TRUE)
> ctDT <- merge(ctDT, cuPheno[, ..cuCTnames],
+               by = "NSFTV_ID", all.x = TRUE, all.y = TRUE)
> names(ctDT) <- c("NSFTV_ID", paste(irriCTnames[-1], "IRRI", sep = "."),
+                 paste(dbCTnames[-1], "DB", sep = "."),
+                 paste(cuCTnames[-1], "CU", sep = "."))
> trtNamesUnion <- c("NSFTV_ID", trtNamesUnion)
> ctDT <- ctDT[, ..trtNamesUnion]
> trtNamesUnion <- trtNamesUnion[-1]
```

Calculate correlations and prepare for plotting.

```
> cmnTrtCor <- cor(as.matrix(ctDT[, ..trtNamesUnion]),
+                  use = "pairwise.complete.obs")
> cmnTrtCor[row(cmnTrtCor) > col(cmnTrtCor)] <- NA
> diag(cmnTrtCor) <- 0.0
> d.cor <- ncol(cmnTrtCor)
> corDT <- data.table(correlation = array(cmnTrtCor),
+                     x = rep(trtNamesUnion, each = d.cor),
+                     y = rep(trtNamesUnion, times = d.cor))
> corDT <- corDT[!is.na(correlation), ]
> corDT <- corDT[, x := factor(x, levels = trtNamesUnion)]
> corDT <- corDT[, y := factor(y, levels = trtNamesUnion)]
```

```
> fwrite(corDT[x != y, .(correlation = round(correlation, 3), x, y)],  
+       file = "crossLocationCorrelations.tsv",  
+       sep = "\t", quote = FALSE)
```

Plot.

```
> pdfFlNam <- "commonTraitCorALL.pdf"  
> showtext_auto()  
> ggplot(data = corDT, aes(x = x, y = y, fill = correlation)) +  
+   geom_tile() +  
+   scale_fill_gradient2(low = "royalblue4", high = "mediumvioletred",  
+     mid = "white", midpoint = 0, limit = c(-1, 1)) +  
+   scale_x_discrete(expand = c(0.2, 0.0)) +  
+   scale_y_discrete(expand = c(0.2, 0.0)) +  
+   theme_minimal(base_size = 18, base_family = "myriad") +  
+   theme(axis.title = element_blank(),  
+     axis.ticks = element_blank(),  
+     axis.text = element_blank(),  
+     panel.grid.major = element_blank(),  
+     legend.position = c(0.32, 0.67),  
+     legend.direction = "horizontal",  
+     legend.justification = c(1, 0)) +  
+   geom_text(data = corDT[x == y, ],  
+     aes(x = x, y = y, label = y),  
+     hjust = 1.0, angle = -45, fontface = "bold", size = 4) +  
+   guides(fill = guide_colorbar(barwidth = 9, barheight = 1,  
+     title.position = "top", title.hjust = 0.5)) +  
+   coord_fixed()  
> ggsave(pdfFlNam, width = 8, height = 8, units = "in",  
+   device = "pdf", useDingbats = FALSE)  
> cat("\\\\includegraphics[width = 0.95\\textwidth]{", pdfFlNam, "}"\\n\\n", sep = "")
```

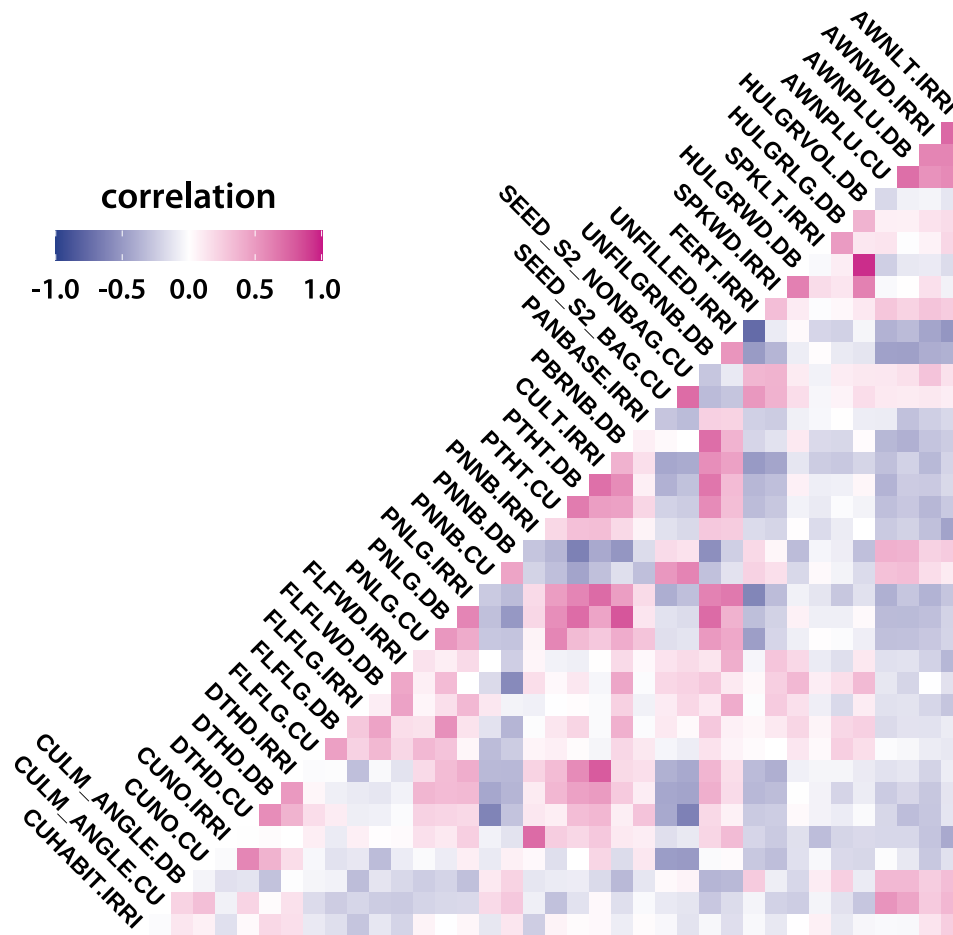

### 5.3 Relationships to IRRI groups

I start by ranking Dale Bumpers and Cornell traits by value against IRRI-determined groups.

```
> N      <- dbPheno[, .N]
> pMatDB <- as.data.table(pMat3[, -3])
> pMatDB <- pMatDB[, NSFTV_ID := newGrp[, NSFTV_ID]]
> pMatDB <- dbPheno[pMatDB, on = "NSFTV_ID", nomatch = 0]
> YscDB  <- dbPheno[, lapply(.SD, scale), .SDcols = trtNamesDB]
> YscDB  <- matrix(unlist(YscDB), nrow = N)
> YscDB  <- YscDB[dbPheno[, NSFTV_ID] %in% pMatDB[, NSFTV_ID], ]
> YscDB  <- scale(YscDB, scale = FALSE)
```



```

> pMatDB <- as.matrix(pMatDB[, paste0("V", 1:2)])
> Psc <- scale(pMatDB, scale = FALSE)
> betaEst <- solve(crossprod(YscDB), crossprod(YscDB, Psc))
> Rsd <- Psc - YscDB%*%betaEst
> Sest <- crossprod(Rsd)
> Sest <- chol2inv(chol(Sest))
> mhlDist <- apply(betaEst, 1, mhl, Sest)
> XtX <- colSums(YscDB*YscDB)
> mhlDist <- mhlDist*XtX
> mhlDT <- data.table(mhlD = mhlDist, traits = trtNamesDB)
> mhlDT <- setorder(mhlDT, -mhlD)
> mhlDT <- mhlDT[, traits := factor(traits, levels = unique(traits))]
> mhlDT

```

|     | mhlD         | traits        |
|-----|--------------|---------------|
| 1:  | 1.7003361696 | HULGRVOL      |
| 2:  | 1.1464494880 | HULGRWD       |
| 3:  | 0.2232899755 | PTH           |
| 4:  | 0.2169209955 | HULGRLG       |
| 5:  | 0.1432562610 | AWNPLU        |
| 6:  | 0.0459394787 | HULGRCO       |
| 7:  | 0.0451933409 | STOLON_BINARY |
| 8:  | 0.0374498096 | FLFLWD        |
| 9:  | 0.0339855418 | UNFILGRNB     |
| 10: | 0.0297355014 | PNNB          |
| 11: | 0.0261613616 | PNLG          |
| 12: | 0.0209333095 | PBRNB         |
| 13: | 0.0202108247 | CULM_ANGLE    |
| 14: | 0.0112852894 | SDSH_BINARY   |
| 15: | 0.0094595861 | DTHD          |
| 16: | 0.0077974376 | FLFLG         |
| 17: | 0.0005277351 | AWN_BINARY    |

```

> fwrite(mhlDT, file = "./MahalanobisDB.tsv", sep = "\t", quote = FALSE)

```

Plot the sorted distances.

```

> pdfFlNam <- "traitMhlP4DB.pdf"
> showtext_auto()
> ggplot(data = mhlDT, aes(x = traits, y = mhlD)) +
+   geom_col(fill = "grey80") +
+   theme_classic(base_size = 18, base_family="myriad") +
+   theme(axis.text.x = element_text(angle = 45, hjust = 1,
+                                     vjust = 1, size = 12)) +
+   ylab(expression("Hotelling T"2)) + xlab("Trait name")
> ggsave(pdfFlNam, width = 8, height = 6, units = "in",
+         device = "pdf", useDingbats = FALSE)
> cat("\\includegraphics{" , pdfFlNam, "}" , sep = "")

```

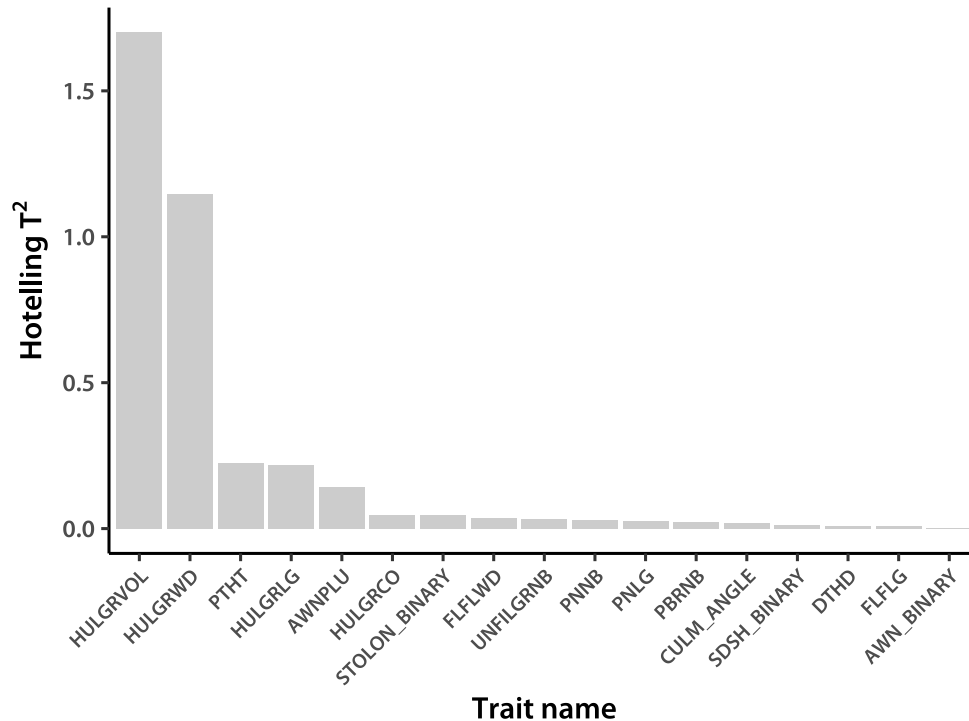

Build trait value boxplots.

```
> colSubs <- c("NSFTV_ID", "newGrp23", trtNamesDB)
> dbPCP <- dbPCP[dbPheno, on = "NSFTV_ID", nomatch = 0]
> traitLG <- melt(dbPCP, id.vars = c("NSFTV_ID", "newGrp23"),
+               variable.name = "trait",
+               measure.vars = colSubs[-(1:2)], value.name = "value")
> traitLG <- traitLG[, newGrp23 := factor(newGrp23, levels = c("P1", "P2/P3", "P4"))]
> traitLG <- traitLG[, trait := factor(trait, levels = mhlDT$traits)]

> pdfFlNam <- "traitsDBbxpP4.pdf"
> showtext_auto()
> ggplot(data = traitLG, aes(x = newGrp23, y = value, fill = newGrp23)) +
+   geom_boxplot(show.legend = FALSE) +
+   scale_fill_manual(values = popGrpColors) +
+   facet_wrap(~trait, ncol = 4, scales = "free_y") +
+   theme_classic(base_size = 12, base_family = "myriad") +
+   theme(strip.background = element_rect(fill = "grey95", linetype = "blank"),
+         strip.text = element_text(size = 10, margin = margin(c(1, 0, 1, 0), "pt")))) +
+   xlab("phenotypic group")
> ggsave(pdfFlNam, width = 8, height = 10, units = "in",
+         device = "pdf", useDingbats = FALSE)
> cat("\\\\includegraphics[width = 0.95\\textwidth]{", pdfFlNam, "}\\n\\n", sep = "")
```

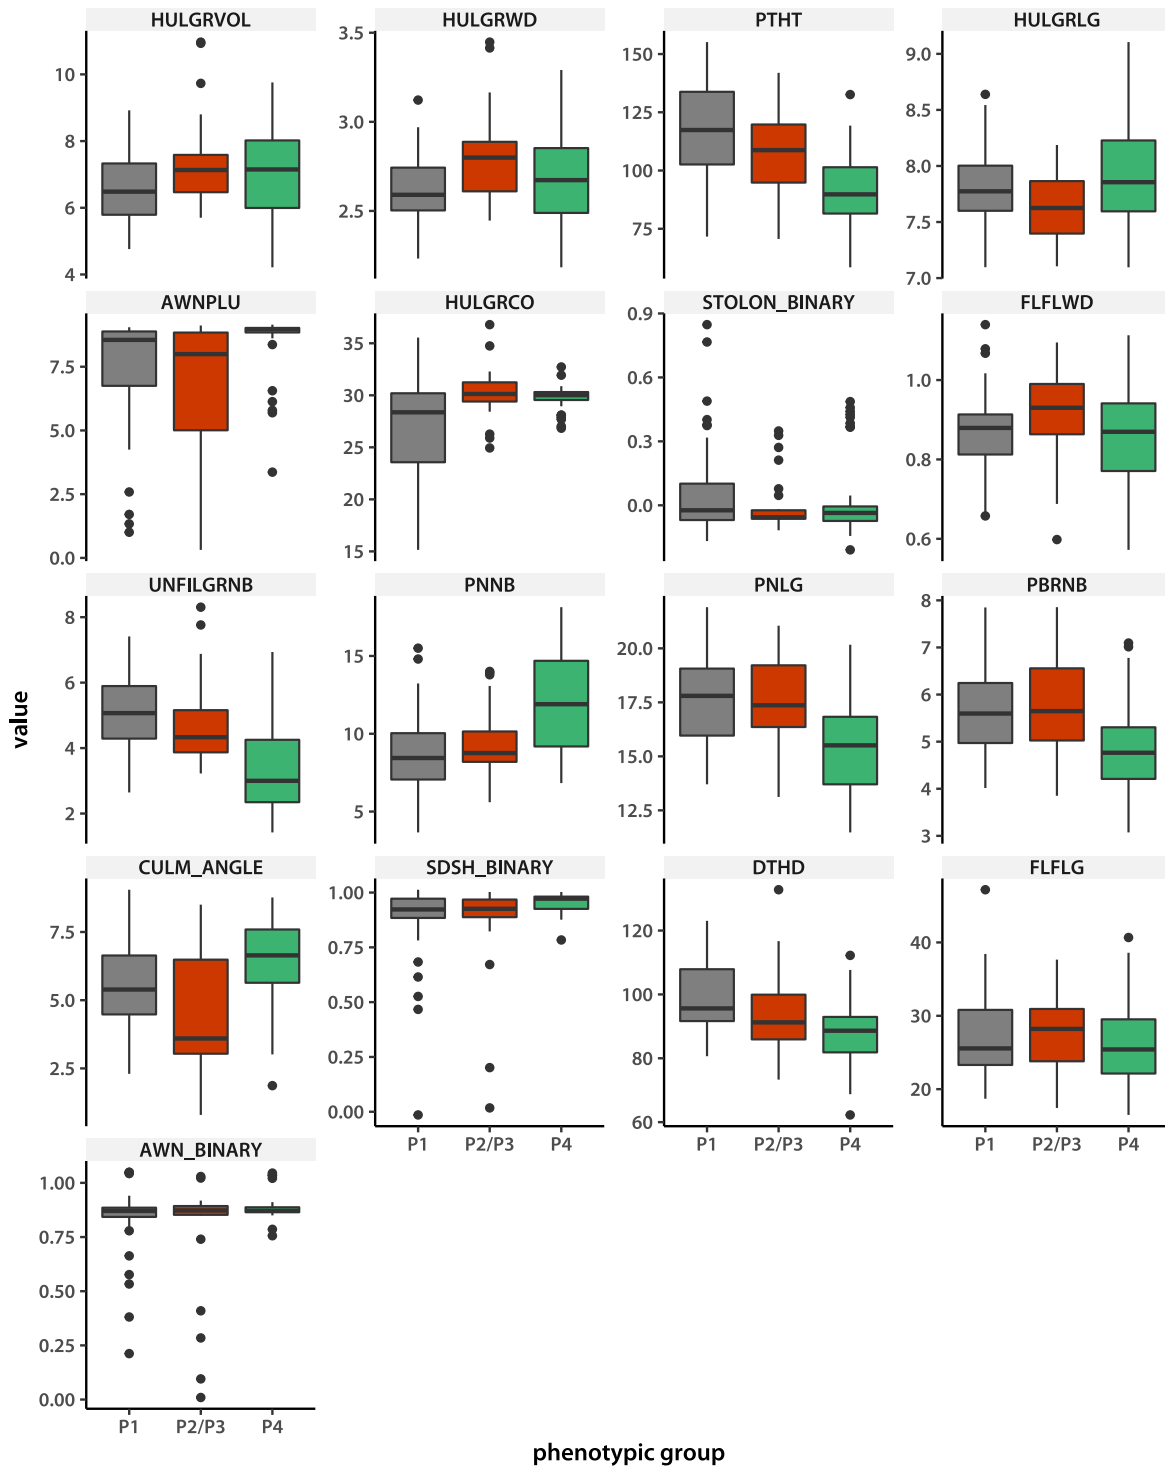

Plot the grain trait pair.

```
> pdfFlNam <- "grainsDB.pdf"
> showtext_auto()
```

```

> ggplot(data = dbPCP, aes(x = HULGRVOL, y = HULGRWD, color = newGrp23)) +
+   geom_point(size = 2) +
+   scale_color_manual(values = popGrpColors[c(1, 2, 5)]) +
+   theme_classic(base_size = 16, base_family = "myriad")
> ggsave(pdfFlNam, width = 10, height = 8, units = "in",
+   device = "pdf", useDingbats = FALSE)
> cat("\\includegraphics[width = 0.95\\textwidth]{", pdfFlNam, "}\\n\\n", sep = "")

```

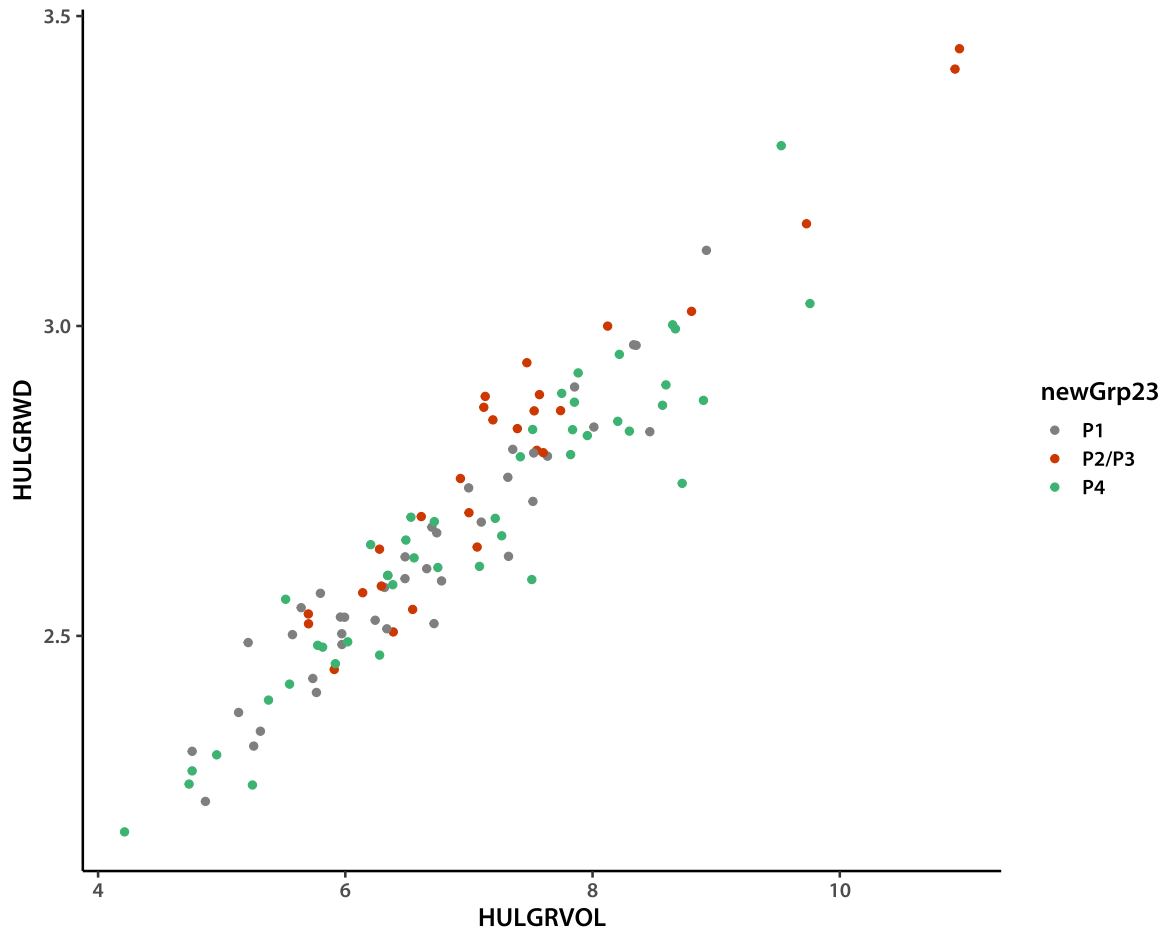

Trait coefficients of variation next.

```

> traitVar <- traitLG[, .(traitCV = sd(value)), by = .(newGrp23, trait)]
> traitVar <- traitVar[, traitCV :=
+   traitCV/rep(traitLG[, mean(value), by = trait]$V1, each = 3)]
> traitVar <- traitVar[, cvCV := sd(traitCV)/mean(traitCV), by = trait]
> traitVar <- traitVar[, trait := factor(trait, levels = mhlDT$traits)]

```

Plot.

```

> pdfFlNam <- "traitSdDBbpP4.pdf"
> showtext_auto()

```

```
> ggplot(data = traitVar,
+       aes(x = newGrp23, y = traitCV, fill = newGrp23)) +
+   geom_col(show.legend = FALSE) +
+   scale_fill_manual(values = popGrpColors) +
+   facet_wrap(~trait, ncol = 4, scales = "free_y") +
+   theme_classic(base_size = 14, base_family = "myriad") +
+   theme(strip.background = element_rect(fill = "grey95", linetype = "blank")) +
+   ylab("coefficient of variation") + xlab("phenotypic group")
> ggsave(pdfFlNam, width = 8, height = 10, units = "in",
+       device = "pdf", useDingbats = FALSE)
> cat("\\\\includegraphics[width = 0.95\\textwidth]{", pdfFlNam, "}\n\n", sep = "")
```

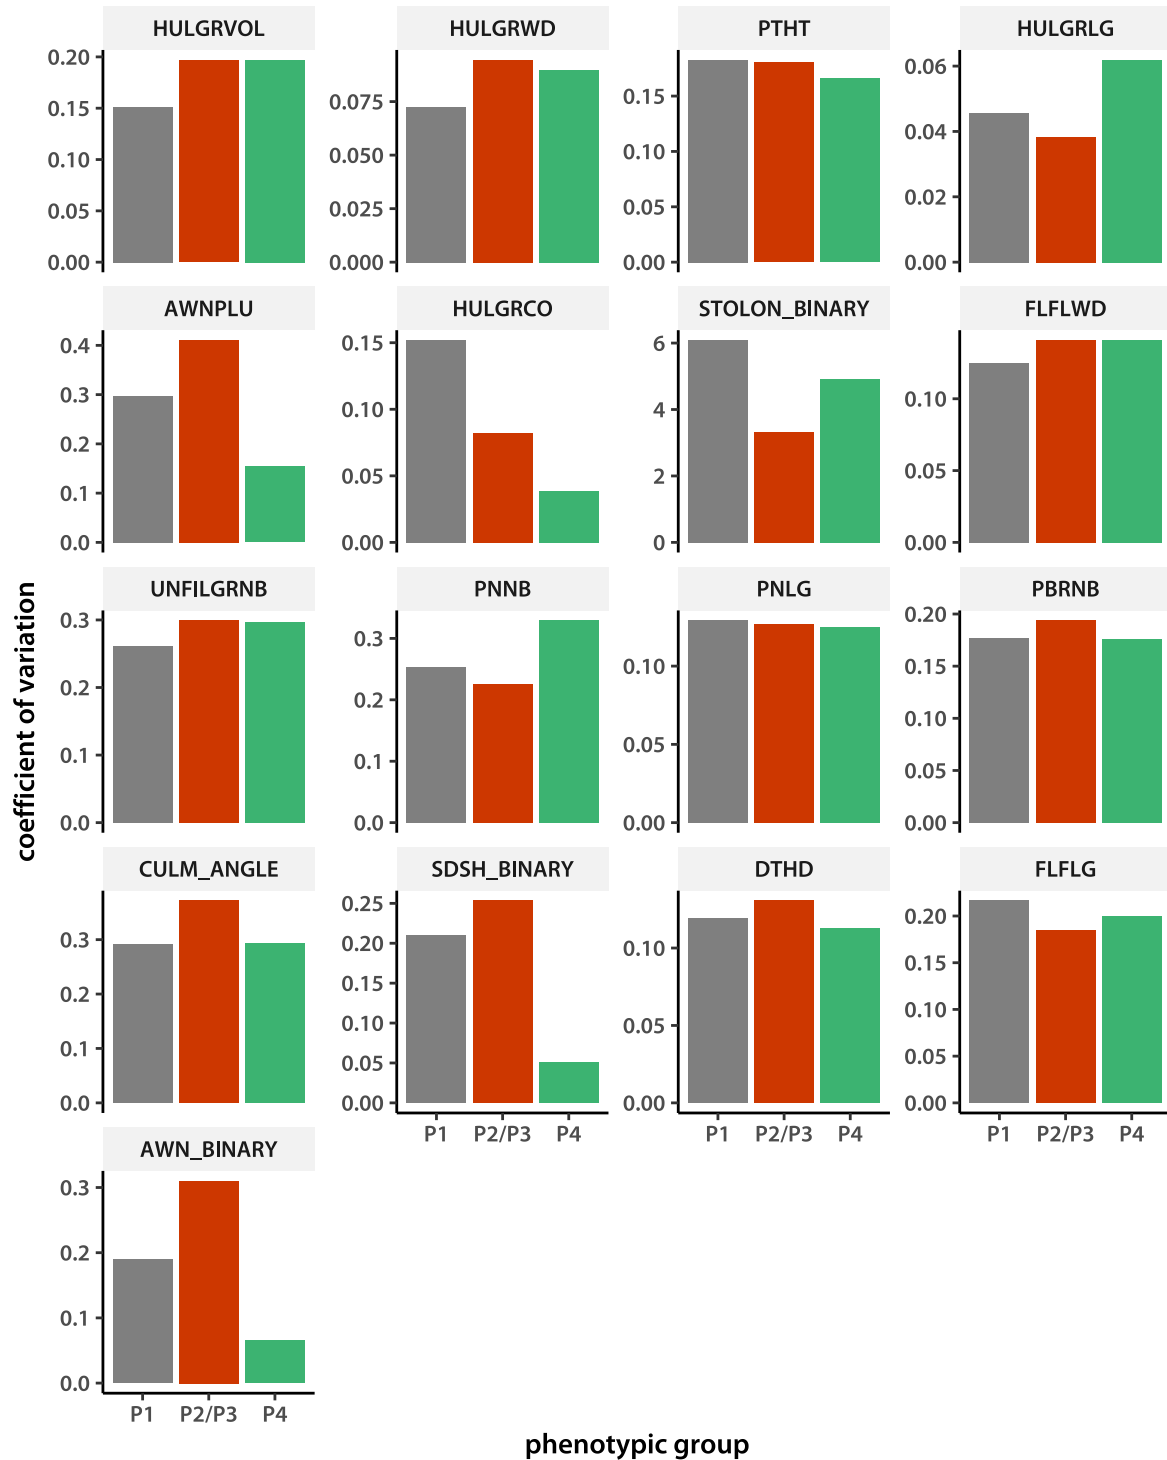

Now repeat this for Cornell data.

```
> N      <- cuPheno[, .N]
> pMatCU <- as.data.table(pMat3[, -3])
```

```

> pMatCU <- pMatCU[, NSFTV_ID := newGrp[, NSFTV_ID]]
> pMatCU <- cuPheno[pMatCU, on = "NSFTV_ID", nomatch = 0]
> YscCU <- cuPheno[, lapply(.SD, scale), .SDcols = trtNamesCU]
> YscCU <- matrix(unlist(YscCU), nrow = N)
> YscCU <- YscCU[cuPheno[, NSFTV_ID] %in% pMatCU[, NSFTV_ID], ]
> YscCU <- scale(YscCU, scale = FALSE)
> pMatCU <- as.matrix(pMatCU[, paste0("V", 1:2)])
> Psc <- scale(pMatCU, scale = FALSE)
> betaEst <- solve(crossprod(YscCU), crossprod(YscCU, Psc))
> Rsd <- Psc - YscCU%*%betaEst
> Sest <- crossprod(Rsd)
> Sest <- chol2inv(chol(Sest))
> mhlDist <- apply(betaEst, 1, mhl, Sest)
> XtX <- colSums(YscCU*YscCU)
> mhlDist <- mhlDist*XtX
> mhlDT <- data.table(mhlD = mhlDist, traits = trtNamesCU)
> mhlDT <- setorder(mhlDT, -mhlD)
> mhlDT <- mhlDT[, traits := factor(traits, levels = unique(traits))]
> mhlDT

```

|     | mhlD        | traits             |
|-----|-------------|--------------------|
| 1:  | 0.245946271 | SEED_S2_NONBAG     |
| 2:  | 0.217436802 | AWNPLU             |
| 3:  | 0.166729004 | SEED_S2_BAG        |
| 4:  | 0.152924304 | AWN_BINARY         |
| 5:  | 0.080647756 | PTHT               |
| 6:  | 0.079428412 | STOLON_BINARY      |
| 7:  | 0.076178071 | SDSH_BINARY        |
| 8:  | 0.064867156 | CUNO               |
| 9:  | 0.064208859 | PERICARPCOL_BINARY |
| 10: | 0.060365838 | FLFLG              |
| 11: | 0.056150501 | CULM_ANGLE         |
| 12: | 0.032442568 | STEMCOL_BINARY     |
| 13: | 0.028873291 | DTHD               |
| 14: | 0.024415857 | PNNB               |
| 15: | 0.022886391 | HULCL              |
| 16: | 0.005340721 | PNLG               |

```

> fwrite(mhlDT, file = "./MahalanobisCU.tsv", sep = "\t", quote = FALSE)

```

Plot the sorted distances.

```

> pdfFlNam <- "traitMhlP4CU.pdf"
> showtext_auto()
> ggplot(data = mhlDT, aes(x = traits, y = mhlD)) +
+   geom_col(fill = "grey80") +
+   theme_classic(base_size = 18, base_family="myriad") +

```

```
+ theme(axis.text.x = element_text(angle = 45, hjust = 1,
+                                   vjust = 1, size = 12)) +
+ ylab(expression("Hotelling T"2)) + xlab("Trait name")
> ggsave(pdfFlNam, width = 8, height = 6, units = "in",
+       device = "pdf", useDingbats = FALSE)
> cat("\\includegraphics{", pdfFlNam, "}\n\n", sep = "")
```

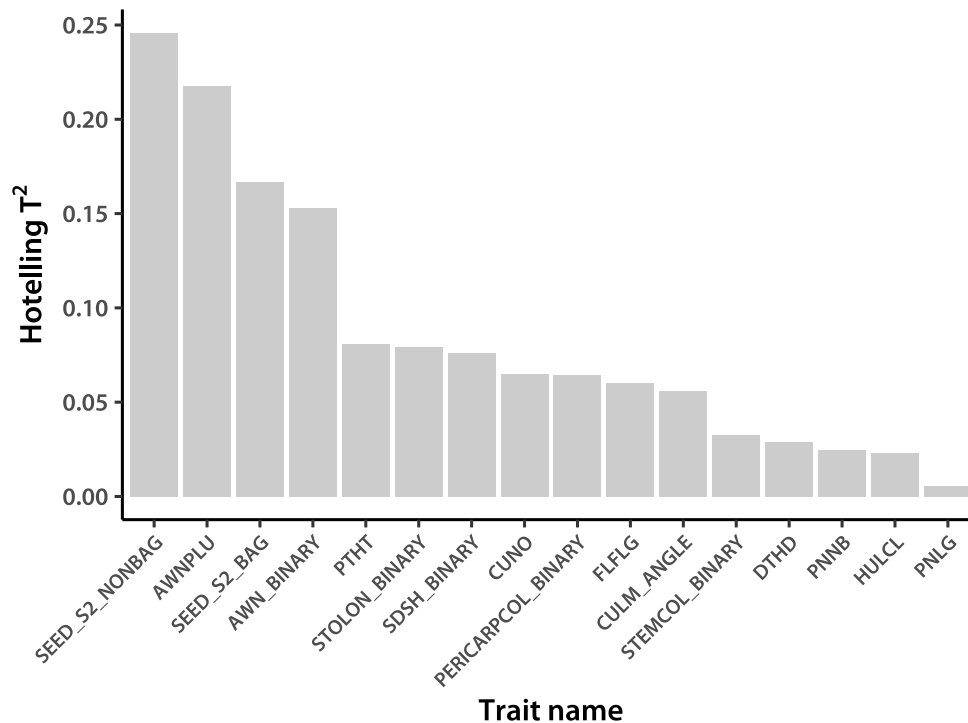

Build trait value boxplots.

```
> colSubs <- c("NSFTV_ID", "newGrp23", trtNamesCU)
> cuPCP <- cuPCP[cuPheno, on = "NSFTV_ID", nomatch = 0]
> traitLG <- melt(cuPCP, id.vars = c("NSFTV_ID", "newGrp23"),
+               variable.name = "trait",
+               measure.vars = colSubs[-(1:2)], value.name = "value")
> traitLG <- traitLG[, newGrp23 := factor(newGrp23, levels = c("P1", "P2/P3", "P4"))]
> traitLG <- traitLG[, trait := factor(trait, levels = mhlDT$traits)]

> pdfFlNam <- "traitsCUBxpP4.pdf"
> showtext_auto()
> ggplot(data = traitLG, aes(x = newGrp23, y = value, fill = newGrp23)) +
+   geom_boxplot(show.legend = FALSE) +
+   scale_fill_manual(values = popGrpColors) +
+   facet_wrap(~trait, ncol = 4, scales = "free_y") +
+   theme_classic(base_size = 12, base_family = "myriad") +
```



```
+   theme(strip.background = element_rect(fill = "grey95", linetype = "blank"),
+         strip.text = element_text(size = 10, margin = margin(c(1, 0, 1, 0), "pt"))) +
+   xlab("phenotypic group")
> ggsave(pdfFlNam, width = 8, height = 10, units = "in",
+         device = "pdf", useDingbats = FALSE)
> cat("\\\\includegraphics[width = 0.95\\textwidth]{", pdfFlNam, "}\n\n", sep = "")
```

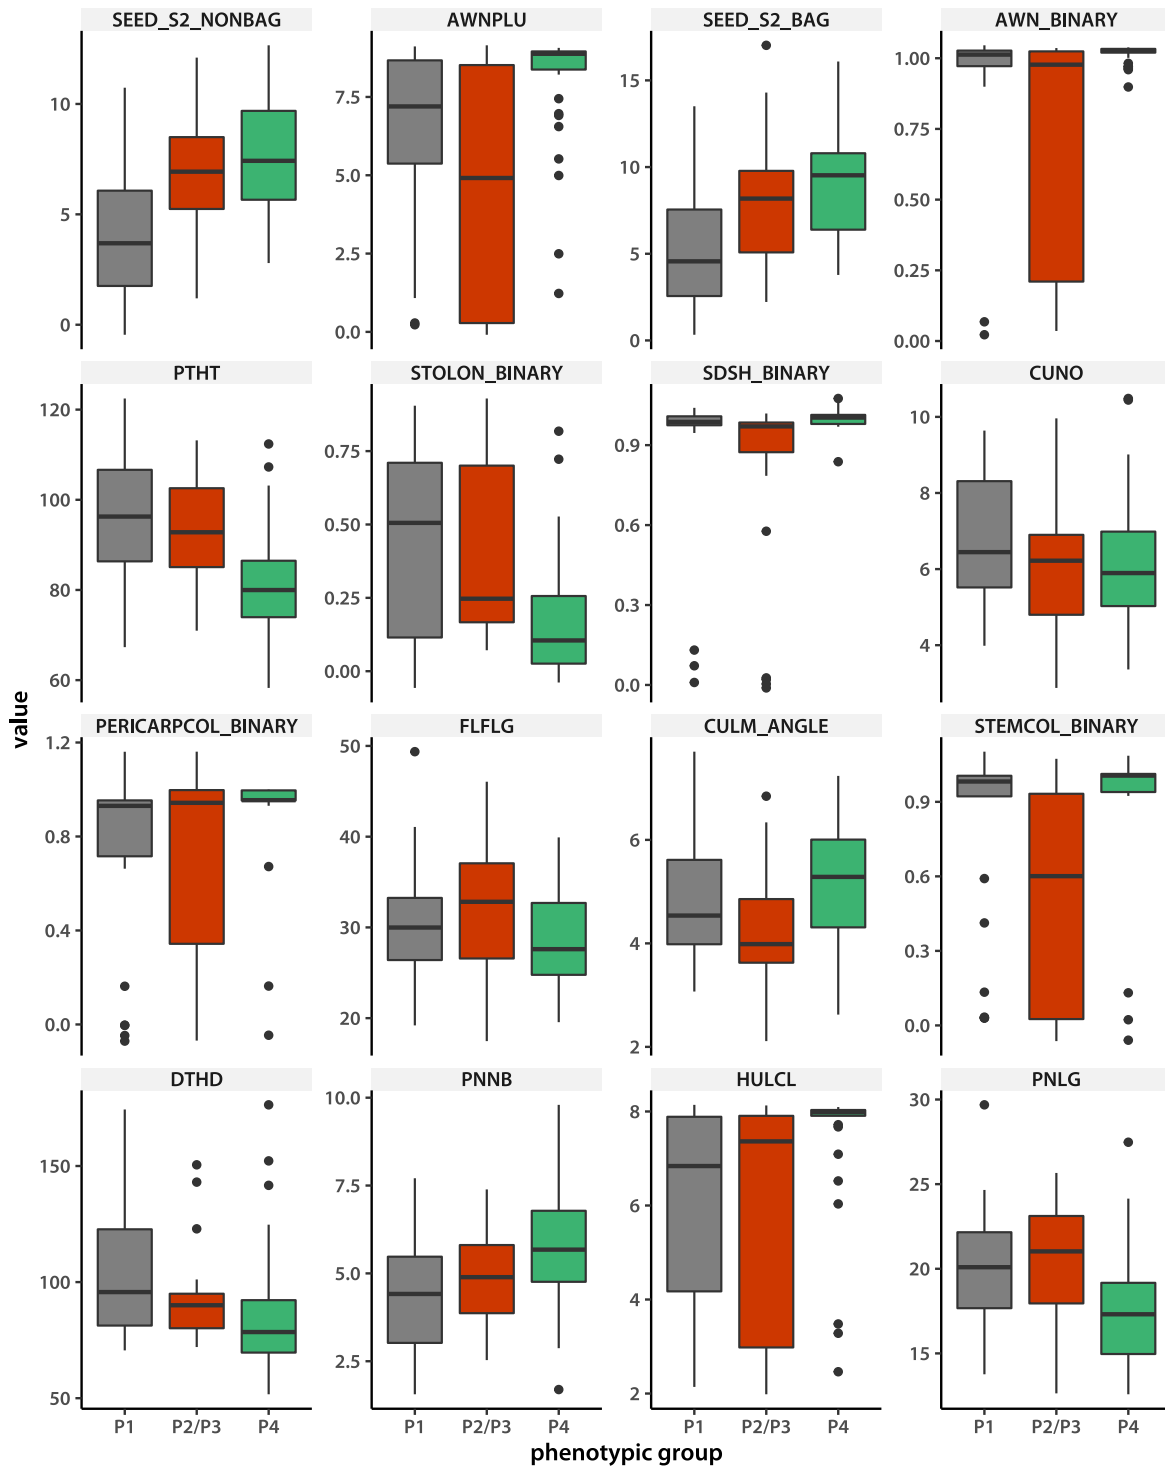

Trait coefficients of variation next.

```
> traitVar <- traitLG[, .(traitCV = sd(value)), by = .(newGrp23, trait)]
> traitVar <- traitVar[, traitCV :=
```

```
+      traitCV/rep(traitLG[, mean(value), by = trait]$V1, each = 3)]
> traitVar <- traitVar[, cvCV := sd(traitCV)/mean(traitCV), by = trait]
> traitVar <- traitVar[, trait := factor(trait, levels = mhlDT$traits)]
```

Plot.

```
> pdfFlNam <- "traitSdCUbpP4.pdf"
> showtext_auto()
> ggplot(data = traitVar,
+       aes(x = newGrp23, y = traitCV, fill = newGrp23)) +
+   geom_col(show.legend = FALSE) +
+   scale_fill_manual(values = popGrpColors) +
+   facet_wrap(~trait, ncol = 4, scales = "free_y") +
+   theme_classic(base_size = 13, base_family = "myriad") +
+   theme(strip.background = element_rect(fill = "grey95", linetype = "blank")) +
+   ylab("coefficient of variation") + xlab("phenotypic group")
> ggsave(pdfFlNam, width = 8, height = 10, units = "in",
+       device = "pdf", useDingbats = FALSE)
> cat("\\\\includegraphics[width = 0.95\\textwidth]{", pdfFlNam, "}\n\n", sep = "")
```

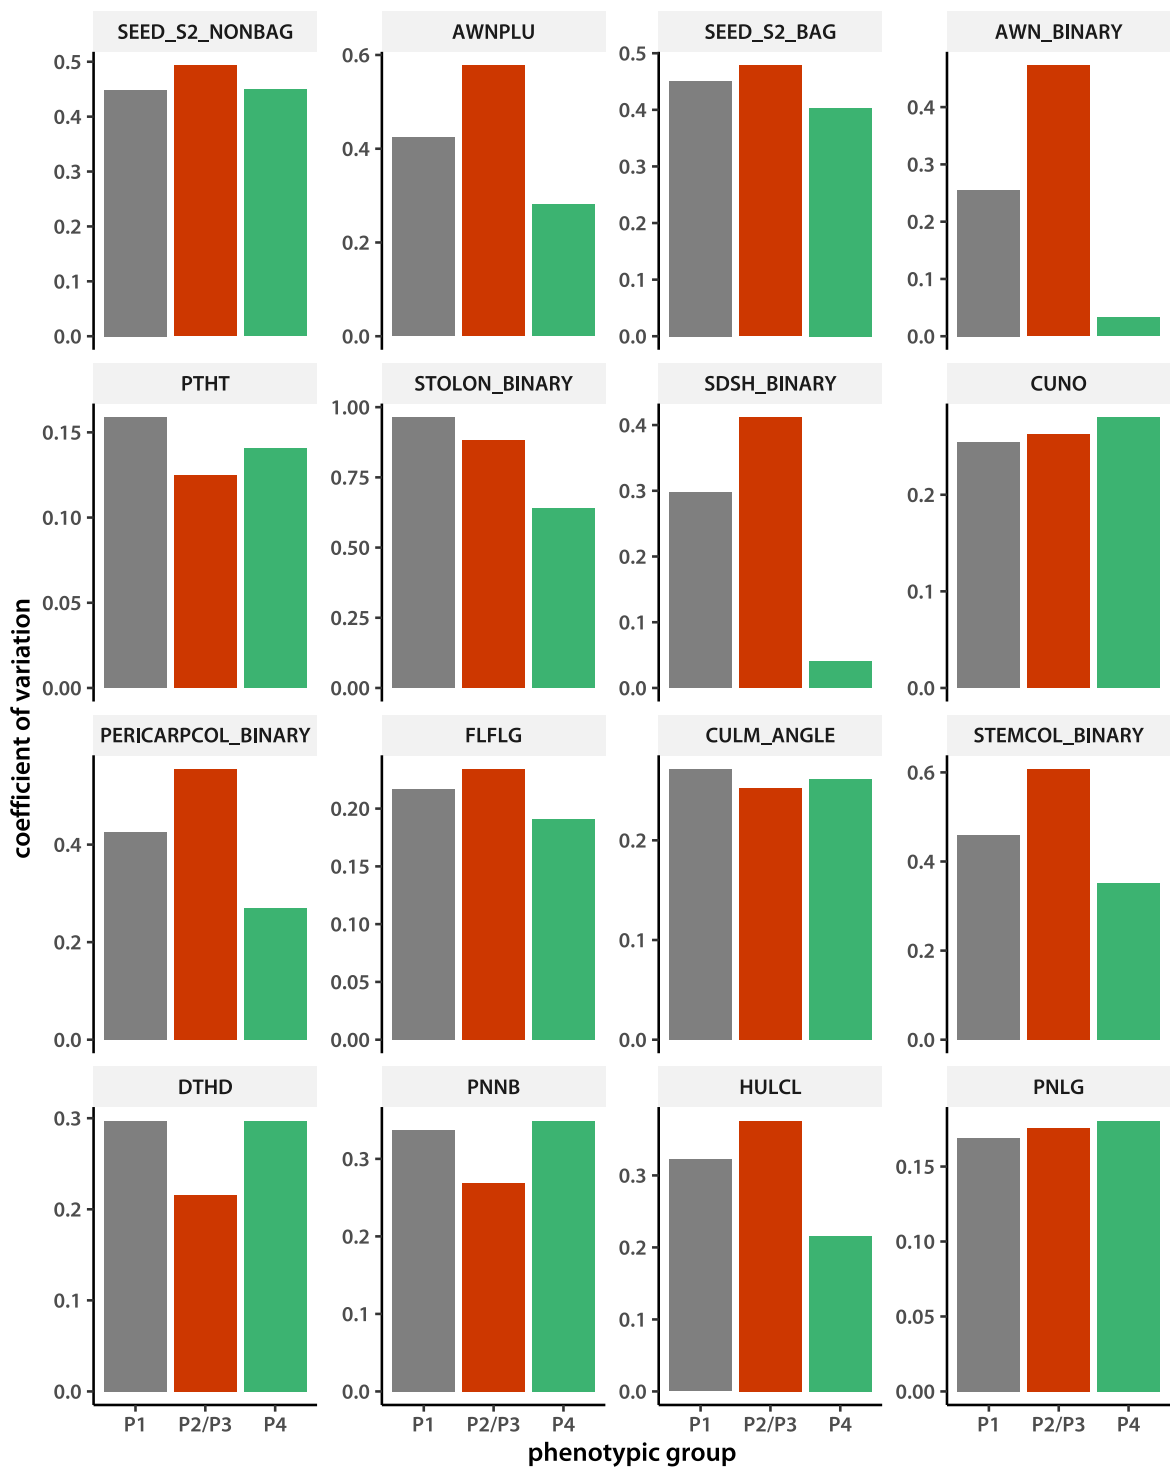

## 6 Group re-inference from Dale Bumpers and Cornell trait subsets

I next use trait subsets from Cornell and Dale Bumpers data to re-infer groups. I start with the top two by value traits from Dale Bumpers data.

```
> trtNamesVW <- c("HULGRVOL", "HULGRWD")
> Ysc <- dbPheno[, lapply(.SD, scale), .SDcols = trtNamesVW]
> names(Ysc) <- trtNamesVW
> if (file.exists("ordDBVWp3.Rdata")) {
+   load(file = "ordDBVWp3.Rdata")
+ } else {
+   ordDBVW <- replicate(nReps,
+     MuGaMix::quickFitModel(Ysc, trtNamesVW, Ngrp, alpha0, nVBreps),
+     simplify = FALSE)
+   save(ordDBVW, file = "ordDBVWp3.Rdata")
+ }
> pMat <- ordDBVW[[1]]$p
> sum(which(pMat[, 1] > 0.9) %in% which(pMat3db[, 1] > 0.6))

[1] 35

> sum(which(pMat[, 1] > 0.9) %in% which(pMat3db[, 3] > 0.6))

[1] 44

> sum(which(pMat[, 2] > 0.9) %in% which(pMat3db[, 1] > 0.6))

[1] 0

> sum(which(pMat[, 2] > 0.9) %in% which(pMat3db[, 3] > 0.6))

[1] 0

> sum(which(pMat[, 3] > 0.9) %in% which(pMat3db[, 1] > 0.6))

[1] 0

> sum(which(pMat[, 3] > 0.9) %in% which(pMat3db[, 3] > 0.6))

[1] 0

> pMat <- pMat[, 3:1]
```

[illegible]

```
> bothPheno      <- dbPheno[cuPheno, on = "NSFTV_ID", nomatch = 0]
> names(bothPheno) <- c("NSFTV_ID", paste0(names(dbPheno)[-1], "_DB"),
+                        paste0(trtNamesCU, "_CU"))
> trtNamesDBCUCU <- paste0(c("PTHT", "HULGRLG", "AWNPLU", "SEED_S2_BAG", "AWNPLU", "PTHT"),
+                          rep(c("_DB", "_CU"), each = 3))
> Ysc            <- bothPheno[, lapply(.SD, scale), .SDcols = trtNamesDBCUCU]
> names(Ysc)     <- trtNamesDBCUCU
> if (file.exists("ordDBCUp3.Rdata")) {
+   load(file = "ordDBCUp3.Rdata")
+ } else {
+   ordDBCUCU <- replicate(nReps,
+                         MuGaMix::quickFitModel(Ysc, trtNamesDBCUCU, Ngrp, alpha0, nVBreps),
+                         simplify = FALSE)
+   save(ordDBCUCU, file = "ordDBCUp3.Rdata")
+ }
> pMat <- ordDBCUCU[[1]]$p
> sum(which(pMat[bothPheno$NSFTV_ID %in% bothPCP$NSFTV_ID, 1] > 0.9)
+      %in% which(pMat3db[, 1] > 0.6))
```

```
[1] 8
```

```
> sum(which(pMat[bothPheno$NSFTV_ID %in% bothPCP$NSFTV_ID, 1] > 0.9)
+       %in% which(pMat3db[, 3] > 0.6))
```

```
[1] 10
```

```
> sum(which(pMat[bothPheno$NSFTV_ID %in% bothPCP$NSFTV_ID, 2] > 0.9)
+       %in% which(pMat3db[, 1] > 0.6))
```

```
[1] 19
```

```
> sum(which(pMat[bothPheno$NSFTV_ID %in% bothPCP$NSFTV_ID, 2] > 0.9)
+       %in% which(pMat3db[, 3] > 0.6))
```

```
[1] 14
```

```
> sum(which(pMat[bothPheno$NSFTV_ID %in% bothPCP$NSFTV_ID, 3] > 0.9)
+       %in% which(pMat3db[, 1] > 0.6))
```

```
[1] 4
```

```
> sum(which(pMat[bothPheno$NSFTV_ID %in% bothPCP$NSFTV_ID, 3] > 0.9)
+       %in% which(pMat3db[, 3] > 0.6))
```

```
[1] 5
```

The group correspondence is not that clear, so I use the *de novo* approach again.

```
> pMat      <- pMat[, c(1, 3, 2)]
> indList <- lapply(2:nReps, function(i){1:Ngrp})
> # P1
> simList <- lapply(1:(nReps - 1), bestCollst,
+                 ordDBCUC[-1], indList, pMat[, 1], 0.6)
> bestInd <- unlist(lapply(simList, which.max))
> trash   <- sapply(1:(nReps - 1), addCol, 1,
+                 Ngrp, ordDBCUC)
> # P4
> simList <- lapply(1:(nReps - 1), bestCollst,
+                 ordDBCUC[-1], indList, pMat[, 3], 0.6)
> bestInd <- unlist(lapply(simList, which.max))
> trash   <- sapply(1:(nReps - 1), addCol, 3,
+                 Ngrp, ordDBCUC)
> # P2
```

```

> bestInd <- rep(1, nReps - 1)
> trash    <- sapply(1:(nReps - 1), addCol, 2,
+                   Ngrp, ordDBCUp3t8.Rdata)
> pMat     <- t(apply(pMat, 1, normalizeP))
> pMat     <- pMat[bothPheno$NSFTV_ID %in% bothPCP$NSFTV_ID, ]
> bothPCP  <- bothPCP[, dbcuSub := paste0("P", apply(pMat, 1, which.max))]
> bothPCP  <- bothPCP[, dbcuSub := ifelse(dbcuSub == "P3", "P4", dbcuSub)]

```

Add days to heading.

```

> trtNamesDBCUp3t8 <- paste0(c("PTHT", "HULGRLG", "AWNPLU", "DTHD",
+                               "SEED_S2_BAG", "AWNPLU", "PTHT", "DTHD"),
+                             rep(c("_DB", "_CU"), each = 4))
> Ysc           <- bothPheno[, lapply(.SD, scale), .SDcols = trtNamesDBCUp3t8]
> names(Ysc)    <- trtNamesDBCUp3t8
> if (file.exists("ordDBCUp3t8.Rdata")) {
+   load(file = "ordDBCUp3t8.Rdata")
+ } else {
+   ordDBCUp3t8 <- replicate(nReps,
+                             MuGaMix::quickFitModel(Ysc, trtNamesDBCUp3t8, Ngrp, alpha0, nVBreps),
+                             simplify = FALSE)
+   save(ordDBCUp3t8, file = "ordDBCUp3t8.Rdata")
+ }
> pMat <- ordDBCUp3t8[[1]]$p
> sum(which(pMat[bothPheno$NSFTV_ID %in% bothPCP$NSFTV_ID, 1] > 0.9)
+      %in% which(pMat3db[, 1] > 0.6))

```

[1] 14

```

> sum(which(pMat[bothPheno$NSFTV_ID %in% bothPCP$NSFTV_ID, 1] > 0.9)
+      %in% which(pMat3db[, 3] > 0.6))

```

[1] 10

```

> sum(which(pMat[bothPheno$NSFTV_ID %in% bothPCP$NSFTV_ID, 2] > 0.9)
+      %in% which(pMat3db[, 1] > 0.6))

```

[1] 9

```

> sum(which(pMat[bothPheno$NSFTV_ID %in% bothPCP$NSFTV_ID, 2] > 0.9)
+      %in% which(pMat3db[, 3] > 0.6))

```

[1] 8



```
> sum(which(pMat[bothPheno$NSFTV_ID %in% bothPCP$NSFTV_ID, 3] > 0.9)
+       %in% which(pMat3db[, 1] > 0.6))
```

```
[1] 8
```

```
> sum(which(pMat[bothPheno$NSFTV_ID %in% bothPCP$NSFTV_ID, 3] > 0.9)
+       %in% which(pMat3db[, 3] > 0.6))
```

```
[1] 11
```

Again, use *de novo* inference.

```
> pMat      <- pMat[, c(2, 3, 1)]
> indList   <- lapply(2:nReps, function(i){1:Ngrp})
> # P1
> simList   <- lapply(1:(nReps - 1), bestCollst,
+                   ordDBCUS8[-1], indList, pMat[, 1], 0.6)
> bestInd   <- unlist(lapply(simList, which.max))
> trash     <- sapply(1:(nReps - 1), addCol, 1,
+                   Ngrp, ordDBCUS8)
> # P4
> simList   <- lapply(1:(nReps - 1), bestCollst,
+                   ordDBCUS8[-1], indList, pMat[, 3], 0.6)
> bestInd   <- unlist(lapply(simList, which.max))
> trash     <- sapply(1:(nReps - 1), addCol, 3,
+                   Ngrp, ordDBCUS8)
> # P2
> bestInd   <- rep(1, nReps - 1)
> trash     <- sapply(1:(nReps - 1), addCol, 2,
+                   Ngrp, ordDBCUS8)
> pMat      <- t(apply(pMat, 1, normalizeP))
> pMat      <- pMat[bothPheno$NSFTV_ID %in% bothPCP$NSFTV_ID, ]
> bothPCP   <- bothPCP[, dbcuSub8 := paste0("P", apply(pMat, 1, which.max))]
> bothPCP   <- bothPCP[, dbcuSub8 := ifelse(dbcuSub8 == "P3", "P4", dbcuSub8)]
```

Arrange variables for Sankey plots.

```
> pGrpSan    <- as.data.table(make_long(bothPCP, GRIN_spp, dbcuSub,
+                                       dbcuSub8, db3, cu3, newGrp23))
> sankeyLevels0 <- c("O. nivara", "Oryza spp.", "O. rufipogon",
+                   c("P4", "P2/P3", "P2", "P1"))
> pGrpSan    <- pGrpSan[, node := factor(node, levels = sankeyLevels0)]
> pGrpSan    <- pGrpSan[, next_node := factor(next_node, levels = sankeyLevels0)]
```

Plot.

```

> pdfFlNam <- "sankeyPGrpDBCUSubset.pdf"
> showtext_auto()
> ggplot(data = pGrpSan, aes(x = x, next_x = next_x, node = node, next_node = next_node,
+                             fill = node, label = node)) +
+   geom_sankey(flow.alpha = 0.6, node.color = "grey30") +
+   geom_sankey_label(size = 5, color = "grey20", fill = "grey90", alpha = 0.8,
+     label = c(expression(italic("O. nivara")),
+                 expression(italic("Oryza spp.")),
+                 expression(italic("O. rufipogon")),
+                 "P4", "P2", "P1", "P4", "P2", "P1",
+                 "P4", "P2", "P1",
+                 "P4", "P2", "P1", "P4", "P2/P3", "P1")) +
+   scale_fill_manual(values = pGrp8Colors) +
+   scale_x_discrete(labels = c("species", "Cornell\nDale Bumpers\n2x3 traits",
+                               "Cornell\nDale Bumpers\n2x4 traits", "Dale\nBumpers",
+                               "Cornell", "IRRI\nall traits")) +
+   theme_sankey(base_size = 18, base_family = "myriad") +
+   theme(strip.background = element_rect(fill = "grey95", linetype = "blank"),
+         legend.position = "none", axis.title = element_blank())
> ggsave(pdfFlNam, width = 8, height = 6, units = "in",
+         device = "pdf", useDingbats = FALSE)
> cat("\\\\includegraphics[width=0.9\\textwidth]{", pdfFlNam, "}"\\n\\n", sep = "")

```

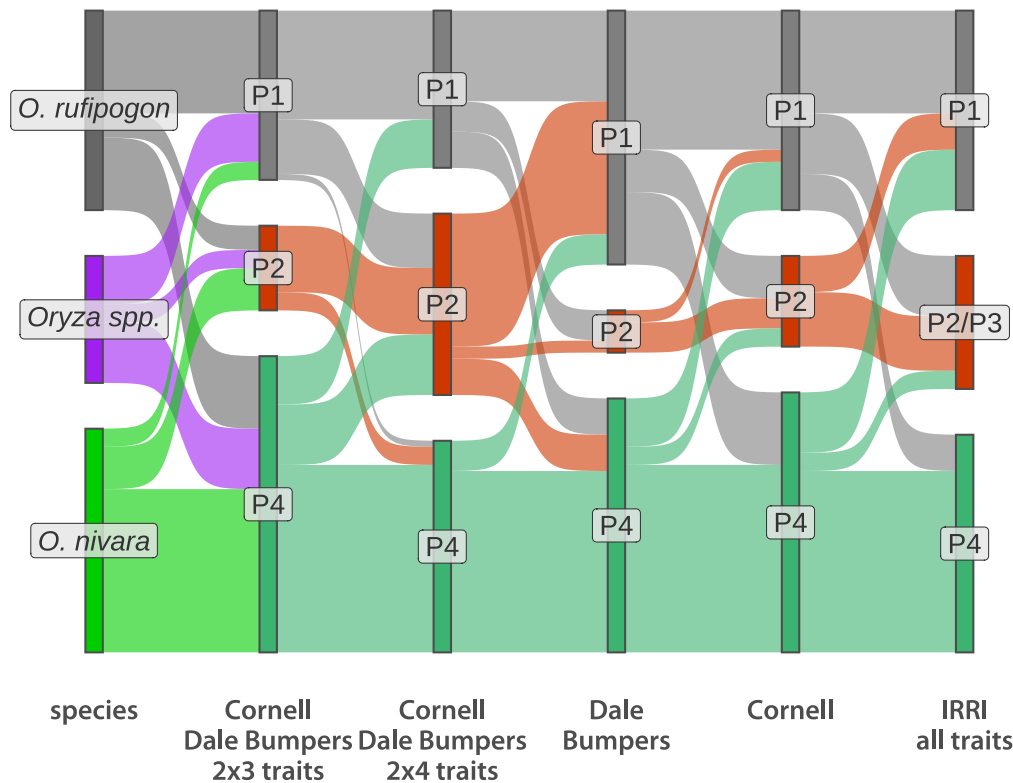

These trait subsets seem mostly good at discrimination between *O. nivara* and the rest of the *ORSC* accessions, and not very consistent in identifying lines with *O. sativa* introgression. Last, I try the trait sets that correspond to the 11 traits identified in IRRI data. I will use the Dale Bumpers and Cornell data separately for this.

## 6.1 Dale Bumpers intersection with 11 traits

Start with Dale Bumpers data.

```
> trtNamesDB11 <- c("PTHT", "UNFILGRNB", "HULGRWD", "HULGRLG",
+                   "PNLG", "DTHD", "FLFLWD", "FLFLG")
> Ysc <- dbPheno[, lapply(.SD, scale), .SDcols = trtNamesDB11]
> names(Ysc) <- trtNamesDB11
> if (file.exists("ordDB11p3.Rdata")) {
+   load(file = "ordDB11p3.Rdata")
+ } else {
+   ordDB11 <- replicate(nReps,
+                         MuGaMix::quickFitModel(Ysc, trtNamesDB11, Ngrp, alpha0, nVBreps),
+                         simplify = FALSE)
+   save(ordDB11, file = "ordDB11p3.Rdata")
+ }
```

```
> pMat <- ordDB11[[1]]$p
> sum(which(pMat[, 1] > 0.9) %in% which(pMat3db[, 1] > 0.6))

[1] 7

> sum(which(pMat[, 1] > 0.9) %in% which(pMat3db[, 3] > 0.6))

[1] 5

> sum(which(pMat[, 2] > 0.9) %in% which(pMat3db[, 1] > 0.6))

[1] 11

> sum(which(pMat[, 2] > 0.9) %in% which(pMat3db[, 3] > 0.6))

[1] 12

> sum(which(pMat[, 3] > 0.9) %in% which(pMat3db[, 1] > 0.6))

[1] 11

> sum(which(pMat[, 3] > 0.9) %in% which(pMat3db[, 3] > 0.6))

[1] 21

> pMat <- pMat[, c(2, 1, 3)]
> indList <- lapply(2:nReps, function(i){1:Ngrp})
> # P1
> simList <- lapply(1:(nReps - 1), bestCollst,
+               ordDB11[-1], indList, pMat[, 1], 0.9)
> bestInd <- unlist(lapply(simList, which.max))
> trash <- sapply(1:(nReps - 1), addCol, 1,
+               Ngrp, ordDB11)
> # P4
> simList <- lapply(1:(nReps - 1), bestCollst,
+               ordDB11[-1], indList, pMat[, 3], 0.9)
> bestInd <- unlist(lapply(simList, which.max))
> trash <- sapply(1:(nReps - 1), addCol, 3,
+               Ngrp, ordDB11)
> # P2
> bestInd <- rep(1, nReps - 1)
> trash <- sapply(1:(nReps - 1), addCol, 2,
+               Ngrp, ordDB11)
```

```

> pMat      <- t(apply(pMat, 1, normalizeP))
> pMat      <- pMat[dbPheno$NSFTV_ID %in% dbPCP$NSFTV_ID, ]
> dbPCP     <- dbPCP[, db3s11 := paste0("P", apply(pMat, 1, which.max))]
> dbPCP     <- dbPCP[, db3s11 := ifelse(db3s11 == "P3", "P4", db3s11)]
> pGrpSan   <- as.data.table(make_long(dbPCP, GRIN_spp, db3s11, db3, newGrp23))
> sankeyLevels0 <- c("O. nivara", "Oryza spp.", "O. rufipogon",
+                   c("P4", "P2/P3", "P2", "P1"))
> pGrpSan    <- pGrpSan[, node := factor(node, levels = sankeyLevels0)]
> pGrpSan    <- pGrpSan[, next_node := factor(next_node, levels = sankeyLevels0)]

```

Plot.

```

> pdfFlNam <- "sankeyPGrpDBirri11.pdf"
> showtext_auto()
> ggplot(data = pGrpSan, aes(x = x, next_x = next_x, node = node, next_node = next_node,
+                           fill = node, label = node)) +
+   geom_sankey(flow.alpha = 0.6, node.color = "grey30") +
+   geom_sankey_label(size = 5, color = "grey20", fill = "grey90", alpha = 0.8,
+                     label = c(expression(italic("O. nivara")),
+                               expression(italic("Oryza spp.")),
+                               expression(italic("O. rufipogon")),
+                               "P4", "P2", "P1", "P4", "P2", "P1",
+                               "P4", "P2/P3", "P1")) +
+   scale_fill_manual(values = pGrp8Colors) +
+   scale_x_discrete(labels = c("species",
+                               "Dale Bumpers\nIRRI 8 (11) traits",
+                               "Dale\nBumpers\nall traits",
+                               "IRRI\nall traits")) +
+   theme_sankey(base_size = 20, base_family = "myriad") +
+   theme(strip.background = element_rect(fill = "grey95", linetype = "blank"),
+         legend.position = "none", axis.title = element_blank())
> ggsave(pdfFlNam, width = 8, height = 6, units = "in",
+         device = "pdf", useDingbats = FALSE)
> cat("\\\\includegraphics[width=0.9\\textwidth]{", pdfFlNam, "}\n\n", sep = "")

```

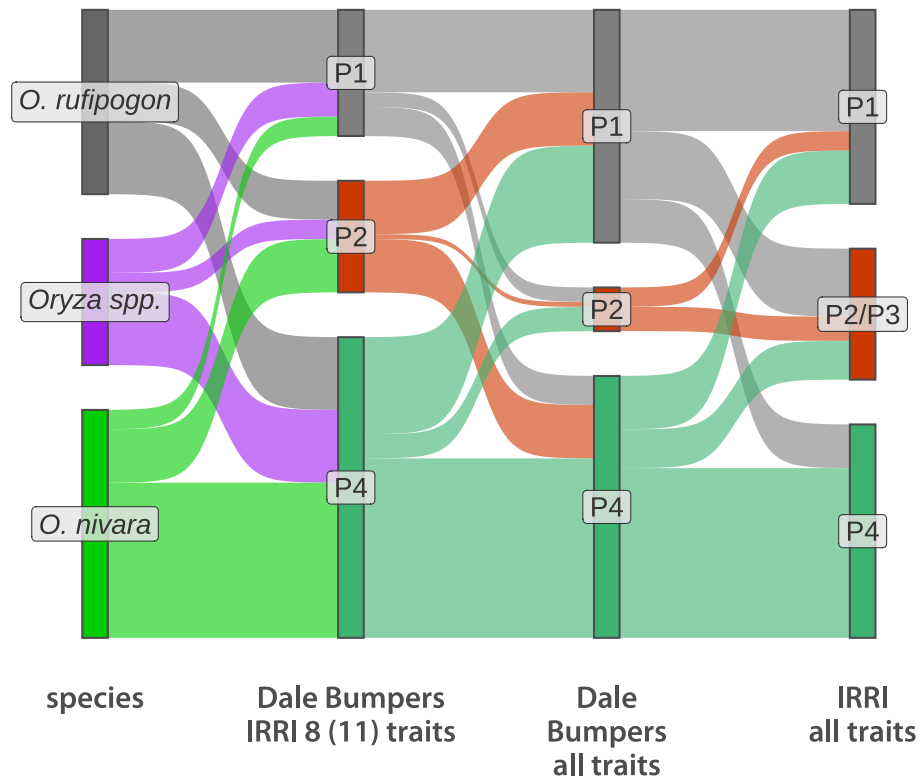

## 6.2 Cornell traits in the IRRI 11

Repeat with Cornell data.

```
> trtNamesCU11 <- c("PTHT", "SEED_S2_BAG", "PNLG", "DTHD", "FLFLG")
> Ysc <- cuPheno[, lapply(.SD, scale), .SDcols = trtNamesCU11]
> names(Ysc) <- trtNamesCU11
> if (file.exists("ordCU11p3.Rdata")) {
+   load(file = "ordCU11p3.Rdata")
+ } else {
+   ordCU11 <- replicate(nReps,
+                         MuGaMix::quickFitModel(Ysc, trtNamesCU11, Ngrp, alpha0, nVBreps),
+                         simplify = FALSE)
+   save(ordCU11, file = "ordCU11p3.Rdata")
+ }
> pMat <- ordCU11[[1]]$p
> sum(which(pMat[, 1] > 0.9) %in% which(pMat3cu[, 1] > 0.6))

[1] 15

> sum(which(pMat[, 1] > 0.9) %in% which(pMat3cu[, 3] > 0.6))
```

```
[1] 22
```

```
> sum(which(pMat[, 2] > 0.9) %in% which(pMat3cu[, 1] > 0.6))
```

```
[1] 4
```

```
> sum(which(pMat[, 2] > 0.9) %in% which(pMat3cu[, 3] > 0.6))
```

```
[1] 3
```

```
> sum(which(pMat[, 3] > 0.9) %in% which(pMat3cu[, 1] > 0.6))
```

```
[1] 5
```

```
> sum(which(pMat[, 3] > 0.9) %in% which(pMat3cu[, 3] > 0.6))
```

```
[1] 7
```

```
> pMat      <- pMat[, 3:1]
> indList <- lapply(2:nReps, function(i){1:Ngrp})
> # P1
> simList <- lapply(1:(nReps - 1), bestCollst,
+               ordCU11[-1], indList, pMat[, 1], 0.9)
> bestInd <- unlist(lapply(simList, which.max))
> trash   <- sapply(1:(nReps - 1), addCol, 1,
+               Ngrp, ordCU11)
> # P4
> simList <- lapply(1:(nReps - 1), bestCollst,
+               ordCU11[-1], indList, pMat[, 3], 0.9)
> bestInd <- unlist(lapply(simList, which.max))
> trash   <- sapply(1:(nReps - 1), addCol, 3,
+               Ngrp, ordCU11)
> # P2
> bestInd <- rep(1, nReps - 1)
> trash   <- sapply(1:(nReps - 1), addCol, 2,
+               Ngrp, ordCU11)
> pMat     <- t(apply(pMat, 1, normalizeP))
> pMat     <- pMat[cuPheno$NSFTV_ID %in% cuPCP$NSFTV_ID, ]
> cuPCP    <- cuPCP[, cu3s11 := paste0("P", apply(pMat, 1, which.max))]
> cuPCP    <- cuPCP[, cu3s11 := ifelse(cu3s11 == "P3", "P4", cu3s11)]
> pGrpSan <- as.data.table(make_long(cuPCP, GRIN_spp, cu3s11, cu3, newGrp23))
> sankeyLevels0 <- c("0. nivara", "Oryza spp.", "O. rufipogon",
+               c("P4", "P2/P3", "P2", "P1"))
> pGrpSan <- pGrpSan[, node := factor(node, levels = sankeyLevels0)]
> pGrpSan <- pGrpSan[, next_node := factor(next_node, levels = sankeyLevels0)]
```

Plot.

```
> pdfFlNam <- "sankeyPGrpCUirri11.pdf"
> showtext_auto()
> ggplot(data = pGrpSan, aes(x = x, next_x = next_x, node = node, next_node = next_node,
+                             fill = node, label = node)) +
+   geom_sankey(flow.alpha = 0.6, node.color = "grey30") +
+   geom_sankey_label(size = 5, color = "grey20", fill = "grey90", alpha = 0.8,
+                     label = c(expression(italic("O. nivara")),
+                               expression(italic("Oryza spp.")),
+                               expression(italic("O. rufipogon")),
+                               "P4", "P2", "P1", "P4", "P2", "P1",
+                               "P4", "P2/P3", "P1")) +
+   scale_fill_manual(values = pGrp8Colors) +
+   scale_x_discrete(labels = c("species",
+                               "Cornell\\nIRRI 5 (11) traits",
+                               "Cornell\\nall traits",
+                               "IRRI\\nall traits")) +
+   theme_sankey(base_size = 20, base_family = "myriad") +
+   theme(strip.background = element_rect(fill = "grey95", linetype = "blank"),
+         legend.position = "none", axis.title = element_blank())
> ggsave(pdfFlNam, width = 8, height = 6, units = "in",
+         device = "pdf", useDingbats = FALSE)
> cat("\\\\includegraphics[width=0.9\\textwidth]{", pdfFlNam, "}"\\n\\n", sep = "")
```



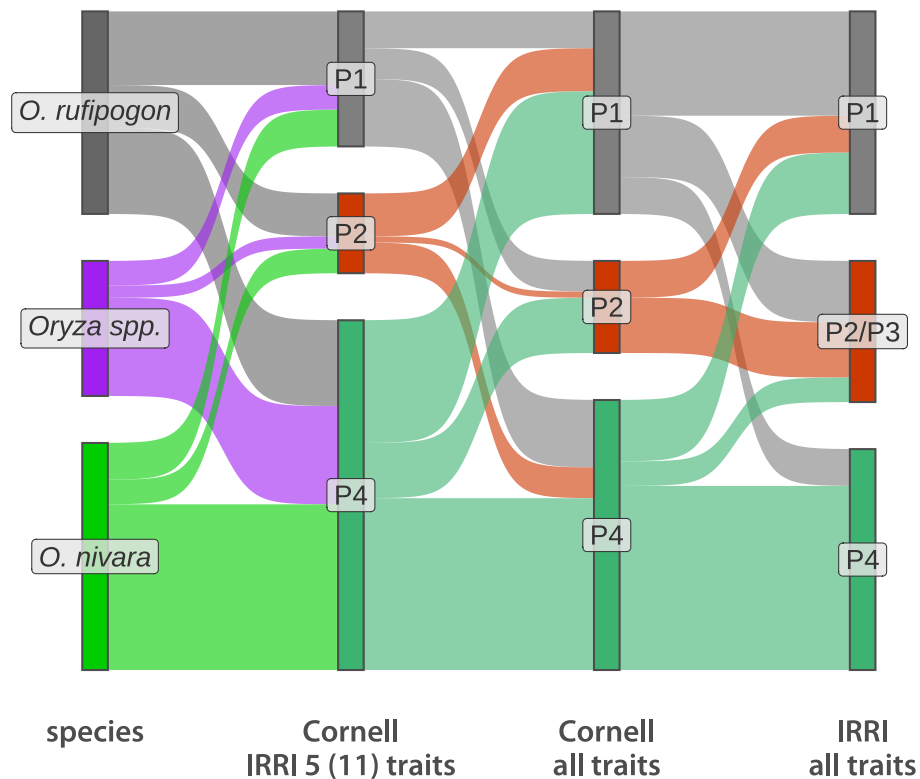

## 7 Dale Bumpers and Cornell within-group correlations

I next estimate among-trait correlation in the Cornell and Dale Bumpers data sets within IRRI data derived groups.

### 7.1 Dale Bumpers

```
> d      <- length(trtNamesDB)
> Ngrp   <- 3
> corList <- list(P1 = NULL, "P2/P3" = NULL, P4 = NULL)
> grpCor  <- cor(matrix(unlist(dbPCP[newGrp23 == "P1", ..trtNamesDB]),
+                       ncol = d))
> colnames(grpCor) <- trtNamesDB
> rownames(grpCor) <- trtNamesDB
> trtNamesDB      <- trtNamesDB[hclust(as.dist(1.0 - grpCor), method = "centroid")$order]
> grpCor          <- grpCor[trtNamesDB, trtNamesDB]
> corList$P1      <- grpCor
> grpCor[row(grpCor) >= col(grpCor)] <- NA
> corDT <- data.table(correlation = array(grpCor),
+                     x           = paste(rep(trtNamesDB, each = d), "P1", sep = "."),
```

```

+           y      = rep(trtNamesDB, times = d),
+           group = rep("P1", times = d^2))
> corDT <- corDT[!is.na(correlation), ]
> for (grp in c("P2/P3", "P4")){
+   grpCor <- cor(matrix(unlist(dbPCP[newGrp23 == grp, ..trtNamesDB]),
+                         ncol = d))
+   colnames(grpCor) <- trtNamesDB
+   rownames(grpCor) <- trtNamesDB
+   corList[[grp]] <- grpCor
+   if (grp == "P2/P3"){
+     grpCor[row(grpCor) > col(grpCor)] <- NA
+     diag(grpCor) <- 0.0
+   } else {
+     grpCor[row(grpCor) >= col(grpCor)] <- NA
+   }
+   corDT <- rbind(corDT, data.table(correlation = array(grpCor),
+               x      = paste(rep(trtNamesDB, each = d), grp, sep = "."),
+               y      = rep(trtNamesDB, times = d),
+               group = rep(grp, times = d^2)))
+   corDT <- corDT[!is.na(correlation), ]
+   corDT[paste(y, "P1", sep = ".") == x, group := NA]
+ }
> corDT <- corDT[, x := factor(x, levels = paste(rep(trtNamesDB, each = Ngrp),
+               rep(c("P1", "P2/P3", "P4"), times = d), sep = "."))]
> corDT <- corDT[, y := factor(y, levels = trtNamesDB)]
> oneSample <- function(){
+   tmpDT <- dbPCP[, .(corPer = lowTrCor(.SD)),
+               by = sample(newGrp23), .SDcols = trtNamesDB]
+   tmpDT <- tmpDT[, traitPair := ..traitPair]
+   tmpDT <- tmpDT[, .(corSpanPer = diff(range(corPer))), by = traitPair]
+   return(tmpDT[, corSpanPer])
+ }
> if (file.exists("corPvalDB.tsv")) {
+   pValDT <- fread("corPvalDB.tsv")
+ } else {
+   traitPair <- corDT[sub("\\.P.", "", x) != y, ]
+   traitPair <- traitPair[, traitPair := paste(sub("\\.P.", "", x), y, sep = ".")]
+   traitPair <- traitPair[, traitPair]
+   ltCorDT <- dbPCP[, .(corTrue = lowTrCor(.SD)),
+               by = newGrp23, .SDcols = trtNamesDB]
+   ltCorDT <- ltCorDT[, traitPair := ..traitPair]
+   ltCorDT <- ltCorDT[, .(corSpan = diff(range(corTrue))), by = traitPair]
+   spanPerMat <- replicate(9999, oneSample())
+   spanPerMat <- cbind(ltCorDT[, corSpan], spanPerMat)
+   traitPmat <- matrix(unlist(strsplit(ltCorDT[, traitPair], "\\."),

```

```

+           ncol = 2, byrow = TRUE)
+   pValDT     <- data.table(x = factor(traitPmat[, 1], levels = trtNamesDB),
+                             y = factor(traitPmat[, 2], levels = trtNamesDB),
+                             p = apply(spanPerMat, 1, getPval))
+   pValDT <- pValDT[, trtPair := paste(x, y, sep = ".")]
+   corDT    <- corDT[, trtPair := paste(sub("\\.P+", "", x), y, sep = ".")]
+   pValDT <- pValDT[corDT, on = "trtPair"]
+   pValDT <- pValDT[is.na(p), p := 1.0]
+   fwrite(pValDT, file = "corPvalDB.tsv", quote = FALSE, sep = "\t")
+ }
> pValDT <- pValDT[, i.x := factor(i.x, levels = paste(rep(trtNamesDB, each = Ngrp),
+                                                         rep(c("P1", "P2/P3", "P4"), times = d), sep = "."))]
> pValDT <- pValDT[, i.y := factor(i.y, levels = trtNamesDB)]
> corPvalsP1 <- setorder(pValDT, p)
> corPvalsP1[p <= 0.01, .(x, y, p, correlation, group)]

```

|    | x             | y          | p      | correlation | group |
|----|---------------|------------|--------|-------------|-------|
| 1: | PBRNB         | PTHT       | 0.0046 | 0.44423547  | P1    |
| 2: | PBRNB         | PTHT       | 0.0046 | 0.04539092  | P2/P3 |
| 3: | PBRNB         | PTHT       | 0.0046 | 0.69128637  | P4    |
| 4: | STOLON_BINARY | CULM_ANGLE | 0.0061 | 0.67631043  | P1    |
| 5: | STOLON_BINARY | CULM_ANGLE | 0.0061 | 0.05138335  | P2/P3 |
| 6: | STOLON_BINARY | CULM_ANGLE | 0.0061 | 0.45200242  | P4    |
| 7: | FLFLG         | HULGRWD    | 0.0086 | -0.13148740 | P1    |
| 8: | FLFLG         | HULGRWD    | 0.0086 | 0.63394178  | P2/P3 |
| 9: | FLFLG         | HULGRWD    | 0.0086 | 0.23228566  | P4    |

```

> fwrite(corPvalsP1[p <= 0.01, .(x, y, p, correlation, group)],
+        file = "corSwitchDB.tsv", sep = "\t", quote = FALSE)

```

Plot.

```

> pdfFlNam <- "traitCorDBp4.pdf"
> showtext_auto()
> ggplot(data = corDT, aes(x = x, y = y, fill = correlation)) +
+   geom_tile() +
+   scale_fill_gradient2(low = "royalblue4", high = "mediumvioletred",
+                         mid = "white", midpoint = 0, limit = c(-1, 1)) +
+   geom_point(data = pValDT[grep("P2/P3", i.x), ],
+              aes(x = as.integer(i.x) - 2.0, y = i.y, color = p), size = 2) +
+   scale_color_gradient2(low = "#27015d", high = "#fbf9fd",
+                         mid = "#6801f9", midpoint = 0.05, limit = c(0, 1)) +
+   scale_x_discrete(expand = c(0.1, 0.0)) +
+   scale_y_discrete(expand = c(0.12, 0.0)) +
+   geom_segment(data = corDT[grep("P4", x), ],
+               aes(x = as.integer(x) - 4.5, y = 0.5,

```

```

+           xend = as.integer(x) - 4.5, yend = as.integer(y) + 0.5),
+           color = "grey30", size = 0.75) +
+   geom_segment(data = corDT[grep("P1", x), ],
+               aes(x = as.integer(x) - 2.5, y = as.integer(y) + 0.5,
+                   xend = max(as.integer(x)) + 0.5, yend = as.integer(y) + 0.5),
+                   color = "grey30", size = 0.75) +
+   geom_segment(x = 1.5, y = 0.5, xend = d*Ngrp - 1.5, yend = 0.5,
+               color = "grey30", size = 0.75) +
+   geom_segment(x = d*Ngrp - 1.5, y = 0.5, xend = d*Ngrp - 1.5,
+               yend = d - 0.5, color = "grey30", size = 0.75) +
+   theme_minimal(base_size = 18, base_family = "myriad") +
+   theme(axis.title = element_blank(),
+         axis.ticks = element_blank(),
+         axis.text = element_blank(),
+         panel.grid.major = element_blank(),
+         legend.position = c(0.32, 0.67),
+         legend.direction = "horizontal",
+         legend.justification = c(1, 0)) +
+   geom_text(data = corDT[x == paste(y, "P2/P3", sep = "."), ],
+           aes(x = x, y = y, label = y),
+           hjust = 1.0, angle = -45, fontface = "bold", size = 5) +
+   guides(fill = guide_colorbar(barwidth = 9, barheight = 1,
+                                title.position = "top", title.hjust = 0.5),
+          color = guide_colorbar(barwidth = 9, barheight = 1,
+                                title.position = "top", title.hjust = 0.5))
> ggsave(pdfFlNam, width = 12, height = 10, units = "in",
+       device = "pdf", useDingbats = FALSE)
> cat("\\\\includegraphics[width = 0.95\\textwidth]{", pdfFlNam, "}\\n\\n", sep = "")

```

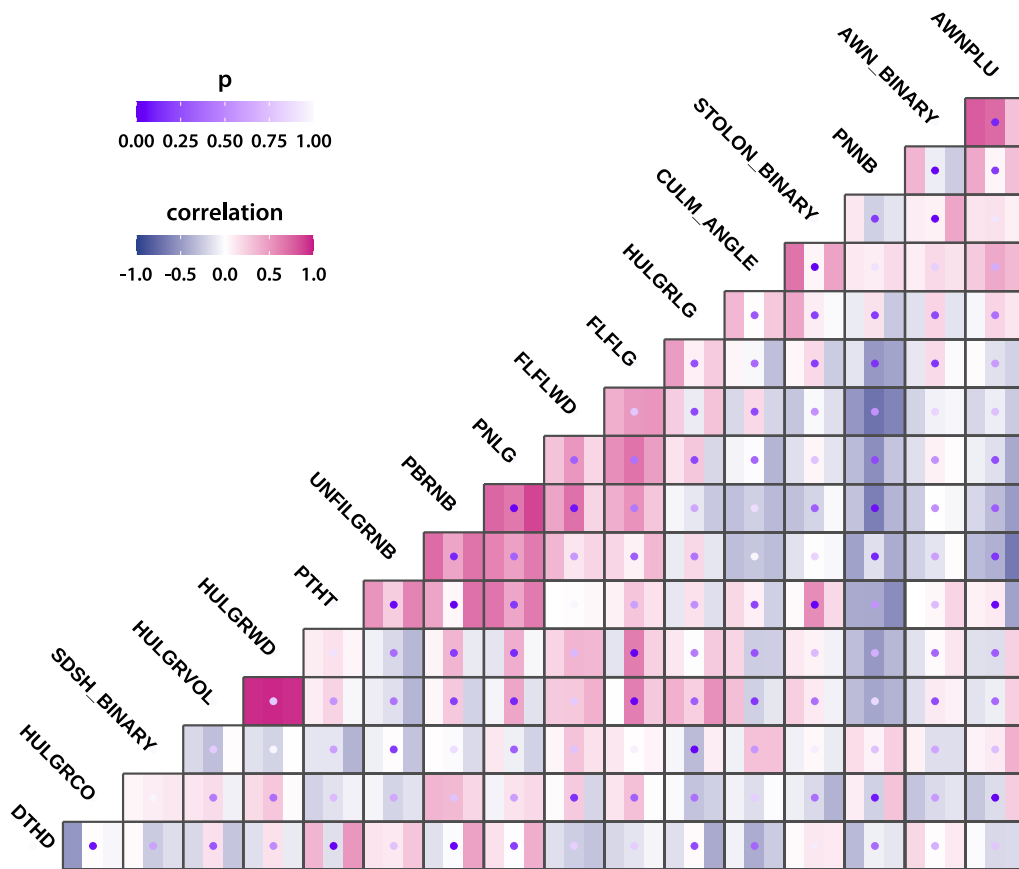

Now use the top correlation-switching traits to re-run the mixture model.

```
> trtNamesDBcs <- unique(unlist(corPvalsP1[p <= 0.01, .(x, y)]))
> Ysc <- dbPheno[, lapply(.SD, scale), .SDcols = trtNamesDBcs]
> names(Ysc) <- trtNamesDBcs
> if (file.exists("ordDBCORp3.Rdata")) {
+   load(file = "ordDBCORp3.Rdata")
+ } else {
+   ordDBcs <- replicate(nReps,
+     MuGaMix::quickFitModel(Ysc, trtNamesDBcs, Ngrp, alpha0, nVBreps),
+     simplify = FALSE)
+   save(ordDBcs, file = "ordDBCORp3.Rdata")
+ }
> pMat <- ordDBcs[[1]]$p
> sum(which(pMat[, 1] > 0.9) %in% which(pMat3db[, 1] > 0.6))
```

```
[1] 2
```

```
> sum(which(pMat[, 1] > 0.9) %in% which(pMat3db[, 3] > 0.6))
```

```
[1] 1
```

```
> sum(which(pMat[, 2] > 0.9) %in% which(pMat3db[, 1] > 0.6))
```

```
[1] 6
```

```
> sum(which(pMat[, 2] > 0.9) %in% which(pMat3db[, 3] > 0.6))
```

```
[1] 11
```

```
> sum(which(pMat[, 3] > 0.9) %in% which(pMat3db[, 1] > 0.6))
```

```
[1] 26
```

```
> sum(which(pMat[, 3] > 0.9) %in% which(pMat3db[, 3] > 0.6))
```

```
[1] 30
```

No straight-forward correspondence to IRRI groups, so running *de novo*.

```
> indList <- lapply(2:nReps, function(i){1:Ngrp})
> # P1
> simList <- lapply(1:(nReps - 1), bestCollst,
+               ordDBcs[-1], indList, pMat[, 1], 0.9)
> bestInd <- unlist(lapply(simList, which.max))
> trash <- sapply(1:(nReps - 1), addCol, 1,
+               Ngrp, ordDBcs)
> # P4
> simList <- lapply(1:(nReps - 1), bestCollst,
+               ordDBcs[-1], indList, pMat[, 3], 0.9)
> bestInd <- unlist(lapply(simList, which.max))
> trash <- sapply(1:(nReps - 1), addCol, 3,
+               Ngrp, ordDBcs)
> # P2
> bestInd <- rep(1, nReps - 1)
> trash <- sapply(1:(nReps - 1), addCol, 2,
+               Ngrp, ordDBcs)
> pMat <- t(apply(pMat, 1, normalizeP))
> pMat <- pMat[dbPheno$NSFTV_ID %in% dbPCP$NSFTV_ID, ]
> dbPCP <- dbPCP[, db3cor := paste0("P", apply(pMat, 1, which.max))]
> dbPCP <- dbPCP[, db3cor := ifelse(db3cor == "P3", "P4", db3cor)]
> pGrpSan <- as.data.table(make_long(dbPCP, GRIN_spp, db3cor, db3, newGrp23))
> sankeyLevels0 <- c("0. nivara", "Oryza spp.", "O. rufipogon",
+               c("P4", "P2/P3", "P2", "P1"))
> pGrpSan <- pGrpSan[, node := factor(node, levels = sankeyLevels0)]
> pGrpSan <- pGrpSan[, next_node := factor(next_node, levels = sankeyLevels0)]
```

Plot.

```
> pdfFlNam <- "sankeyPGrpDBcor.pdf"
> showtext_auto()
> ggplot(data = pGrpSan, aes(x = x, next_x = next_x, node = node, next_node = next_node,
+                             fill = node, label = node)) +
+   geom_sankey(flow.alpha = 0.6, node.color = "grey30") +
+   geom_sankey_label(size = 5, color = "grey20", fill = "grey90", alpha = 0.8,
+                     label = c(expression(italic("O. nivara")),
+                               expression(italic("Oryza spp.")),
+                               expression(italic("O. rufipogon")),
+                               "P4", "P2", "P1", "P4", "P2", "P1",
+                               "P4", "P2/P3", "P1")) +
+   scale_fill_manual(values = pGrp8Colors) +
+   scale_x_discrete(labels = c("species",
+                               "Dale Bumpers\ncorrelation (6)",
+                               "Dale\nBumpers\nall traits",
+                               "IRRI\nall traits")) +
+   theme_sankey(base_size = 20, base_family = "myriad") +
+   theme(strip.background = element_rect(fill = "grey95", linetype = "blank"),
+         legend.position = "none", axis.title = element_blank())
> ggsave(pdfFlNam, width = 8, height = 6, units = "in",
+         device = "pdf", useDingbats = FALSE)
> cat("\\\\includegraphics[width=0.9\\textwidth]{", pdfFlNam, "}\n\n", sep = "")
```

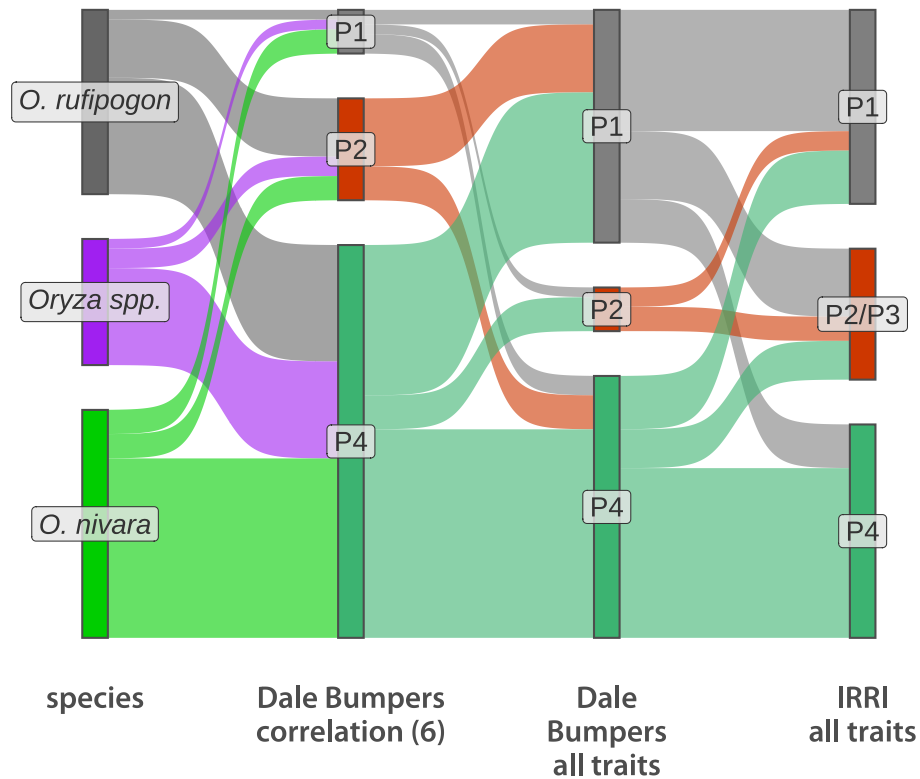

## 7.2 Cornell

```

> cuPCP <- cuPCP[cuPheno, on = "NSFTV_ID", nomatch = 0]
> d <- length(trtNamesCU)
> Ngrp <- 3
> corList <- list(P1 = NULL, "P2/P3" = NULL, P4 = NULL)
> grpCor <- cor(matrix(unlist(cuPCP[newGrp23 == "P1", ..trtNamesCU]),
+                       ncol = d))
> colnames(grpCor) <- trtNamesCU
> rownames(grpCor) <- trtNamesCU
> trtNamesCU <- trtNamesCU[hclust(as.dist(1.0 - grpCor), method = "centroid")$order]
> grpCor <- grpCor[trtNamesCU, trtNamesCU]
> corList$P1 <- grpCor
> grpCor[row(grpCor) >= col(grpCor)] <- NA
> corDT <- data.table(correlation = array(grpCor),
+                     x = paste(rep(trtNamesCU, each = d), "P1", sep = "."),
+                     y = rep(trtNamesCU, times = d),
+                     group = rep("P1", times = d^2))
> corDT <- corDT[!is.na(correlation), ]
> for (grp in c("P2/P3", "P4")){
+   grpCor <- cor(matrix(unlist(cuPCP[newGrp23 == grp, ..trtNamesCU]),

```



```

+           ncol = d))
+   colnames(grpCor) <- trtNamesCU
+   rownames(grpCor) <- trtNamesCU
+   corList[[grp]] <- grpCor
+   if (grp == "P2/P3"){
+     grpCor[row(grpCor) > col(grpCor)] <- NA
+     diag(grpCor) <- 0.0
+   } else {
+     grpCor[row(grpCor) >= col(grpCor)] <- NA
+   }
+   corDT <- rbind(corDT, data.table(correlation = array(grpCor),
+     x      = paste(rep(trtNamesCU, each = d), grp, sep = "."),
+     y      = rep(trtNamesCU, times = d),
+     group = rep(grp, times = d^2)))
+   corDT <- corDT[!is.na(correlation), ]
+   corDT[paste(y, "P1", sep = ".") == x, group := NA]
+ }
> corDT <- corDT[, x := factor(x, levels = paste(rep(trtNamesCU, each = Ngrp),
+   rep(c("P1", "P2/P3", "P4"), times = d), sep = "."))]
> corDT <- corDT[, y := factor(y, levels = trtNamesCU)]
> oneSample <- function(){
+   tmpDT <- cuPCP[, .(corPer = lowTrCor(.SD)),
+     by = sample(newGrp23), .SDcols = trtNamesCU]
+   tmpDT <- tmpDT[, traitPair := ..traitPair]
+   tmpDT <- tmpDT[, .(corSpanPer = diff(range(corPer))), by = traitPair]
+   return(tmpDT[, corSpanPer])
+ }
> if (file.exists("corPvalCU.tsv")) {
+   pValDT <- fread("corPvalCU.tsv")
+ } else {
+   traitPair <- corDT[sub("\\.P+", "", x) != y, ]
+   traitPair <- traitPair[, traitPair := paste(sub("\\.P+", "", x), y, sep = ".")]
+   traitPair <- traitPair[, traitPair]
+   ltCorDT <- cuPCP[, .(corTrue = lowTrCor(.SD)),
+     by = newGrp23, .SDcols = trtNamesCU]
+   ltCorDT <- ltCorDT[, traitPair := ..traitPair]
+   ltCorDT <- ltCorDT[, .(corSpan = diff(range(corTrue))), by = traitPair]
+   spanPerMat <- replicate(9999, oneSample())
+   spanPerMat <- cbind(ltCorDT[, corSpan], spanPerMat)
+   traitPmat <- matrix(unlist(strsplit(ltCorDT[, traitPair], "\\."),
+     ncol = 2, byrow = TRUE)
+   pValDT <- data.table(x = factor(traitPmat[, 1], levels = trtNamesCU),
+     y = factor(traitPmat[, 2], levels = trtNamesCU),
+     p = apply(spanPerMat, 1, getPval))
+   pValDT <- pValDT[, trtPair := paste(x, y, sep = ".")]

```

```

+   corDT <- corDT[, trtPair := paste(sub("\\.P.", "", x), y, sep = ".")]
+   pValDT <- pValDT[corDT, on = "trtPair"]
+   pValDT <- pValDT[is.na(p), p := 1.0]
+   fwrite(pValDT, file = "corPvalCU.tsv", quote = FALSE, sep = "\t")
+ }
> pValDT <- pValDT[, i.x := factor(i.x, levels = paste(rep(trtNamesCU, each = Ngrp),
+   rep(c("P1", "P2/P3", "P4"), times = d), sep = "."))]
> pValDT <- pValDT[, i.y := factor(i.y, levels = trtNamesCU)]
> corPvalsP1 <- setorder(pValDT, p)
> corPvalsP1[p <= 0.01, .(x, y, p, correlation, group)]

```

|     | x                         | y     | p      | correlation | group |
|-----|---------------------------|-------|--------|-------------|-------|
| 1:  | SEED_S2_BAG               | PNNB  | 0.0035 | 0.59745996  | P1    |
| 2:  | SEED_S2_BAG               | PNNB  | 0.0035 | -0.05346446 | P2/P3 |
| 3:  | SEED_S2_BAG               | PNNB  | 0.0035 | 0.55210038  | P4    |
| 4:  | HULCL                     | FLFLG | 0.0048 | 0.36929946  | P1    |
| 5:  | HULCL                     | FLFLG | 0.0048 | 0.21143570  | P2/P3 |
| 6:  | HULCL                     | FLFLG | 0.0048 | -0.40768852 | P4    |
| 7:  | SEED_S2_BAG               | PNLG  | 0.0057 | -0.15317897 | P1    |
| 8:  | SEED_S2_BAG               | PNLG  | 0.0057 | 0.49440716  | P2/P3 |
| 9:  | SEED_S2_BAG               | PNLG  | 0.0057 | -0.33377214 | P4    |
| 10: | CULM_ANGLE STEMCOL_BINARY |       | 0.0097 | 0.06138276  | P1    |
| 11: | CULM_ANGLE STEMCOL_BINARY |       | 0.0097 | 0.63436569  | P2/P3 |
| 12: | CULM_ANGLE STEMCOL_BINARY |       | 0.0097 | 0.32532670  | P4    |

```

> fwrite(corPvalsP1[p <= 0.01, .(x, y, p, correlation, group)],
+   file = "corSwitchCU.tsv", sep = "\t", quote = FALSE)

```

Plot.

```

> pdfFlNam <- "traitCorCU4.pdf"
> showtext_auto()
> ggplot(data = corDT, aes(x = x, y = y, fill = correlation)) +
+   geom_tile() +
+   scale_fill_gradient2(low = "royalblue4", high = "mediumvioletred",
+     mid = "white", midpoint = 0, limit = c(-1, 1)) +
+   geom_point(data = pValDT[grep("P2/P3", i.x), ],
+     aes(x = as.integer(i.x) - 2.0, y = i.y, color = p), size = 2) +
+   scale_color_gradient2(low = "#27015d", high = "#fbf9fd",
+     mid = "#6801f9", midpoint = 0.05, limit = c(0, 1)) +
+   scale_x_discrete(expand = c(0.13, 0.0)) +
+   scale_y_discrete(expand = c(0.12, 0.0)) +
+   geom_segment(data = corDT[grep("P4", x), ],
+     aes(x = as.integer(x) - 4.5, y = 0.5,
+       xend = as.integer(x) - 4.5, yend = as.integer(y) + 0.5),
+     color = "grey30", size = 0.75) +
+   geom_segment(data = corDT[grep("P1", x), ],

```

```
+       aes(x = as.integer(x) - 2.5, y = as.integer(y) + 0.5,
+         xend = max(as.integer(x)) + 0.5, yend = as.integer(y) + 0.5),
+       color = "grey30", size = 0.75) +
+   geom_segment(x = 1.5, y = 0.5, xend = d*Ngrp - 1.5, yend = 0.5,
+     color = "grey30", size = 0.75) +
+   geom_segment(x = d*Ngrp - 1.5, y = 0.5, xend = d*Ngrp - 1.5,
+     yend = d - 0.5, color = "grey30", size = 0.75) +
+   theme_minimal(base_size = 18, base_family = "myriad") +
+   theme(axis.title = element_blank(),
+     axis.ticks = element_blank(),
+     axis.text = element_blank(),
+     panel.grid.major = element_blank(),
+     legend.position = c(0.32, 0.67),
+     legend.direction = "horizontal",
+     legend.justification = c(1, 0)) +
+   geom_text(data = corDT[x == paste(y, "P2/P3", sep = "."), ],
+     aes(x = x, y = y, label = y),
+     hjust = 1.0, angle = -45, fontface = "bold", size = 5) +
+   guides(fill = guide_colorbar(barwidth = 9, barheight = 1,
+     title.position = "top", title.hjust = 0.5),
+     color = guide_colorbar(barwidth = 9, barheight = 1,
+     title.position = "top", title.hjust = 0.5))
> ggsave(pdfFlNam, width = 12, height = 10, units = "in",
+   device = "pdf", useDingbats = FALSE)
> cat("\\\\includegraphics[width = 0.95\\textwidth]{", pdfFlNam, "}\\n\\n", sep = "")
```

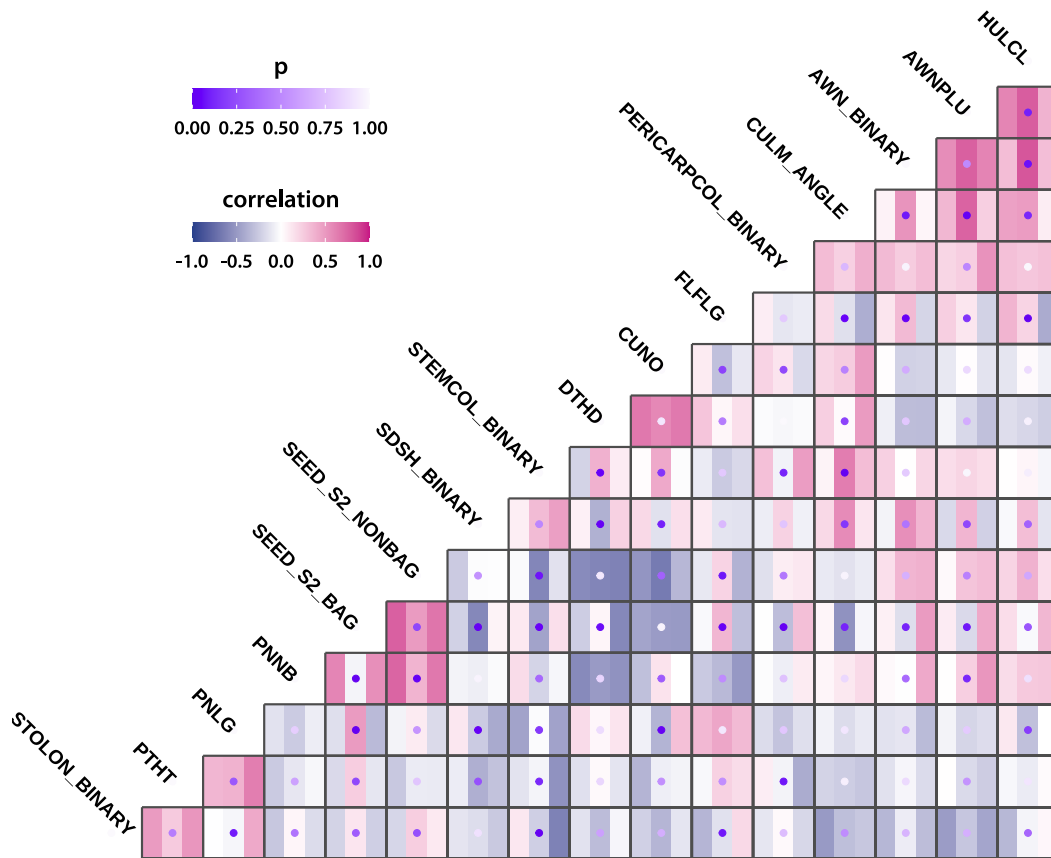

Again, use the top correlation-switching traits to re-run the mixture model.

```
> trtNamesCUcs <- unique(unlist(corPvalsP1[p <= 0.01, .(x, y)]))
> Ysc          <- cuPheno[, lapply(.SD, scale), .SDcols = trtNamesCUcs]
> names(Ysc)   <- trtNamesCUcs
> if (file.exists("ordCUCORp3.Rdata")) {
+   load(file = "ordCUCORp3.Rdata")
+ } else {
+   ordCUcs <- replicate(nReps,
+     MuGaMix::quickFitModel(Ysc, trtNamesCUcs, Ngrp, alpha0, nVBreps),
+     simplify = FALSE)
+   save(ordCUcs, file = "ordCUCORp3.Rdata")
+ }
> pMat <- ordCUcs[[1]]$p
> sum(which(pMat[, 1] > 0.9) %in% which(pMat3cu[, 1] > 0.6))
```

```
[1] 9
```

```
> sum(which(pMat[, 1] > 0.9) %in% which(pMat3cu[, 3] > 0.6))
```

```
[1] 10
```

```
> sum(which(pMat[, 2] > 0.9) %in% which(pMat3cu[, 1] > 0.6))
```

```
[1] 7
```

```
> sum(which(pMat[, 2] > 0.9) %in% which(pMat3cu[, 3] > 0.6))
```

```
[1] 4
```

```
> sum(which(pMat[, 3] > 0.9) %in% which(pMat3cu[, 1] > 0.6))
```

```
[1] 12
```

```
> sum(which(pMat[, 3] > 0.9) %in% which(pMat3cu[, 3] > 0.6))
```

```
[1] 22
```

No straight-forward correspondence to IRRI groups again, so running *de novo*.

```
> indList <- lapply(2:nReps, function(i){1:Ngrp})
> # P1
> simList <- lapply(1:(nReps - 1), bestCollst,
+               ordCUcs[-1], indList, pMat[, 1], 0.9)
> bestInd <- unlist(lapply(simList, which.max))
> trash <- sapply(1:(nReps - 1), addCol, 1,
+               Ngrp, ordCUcs)
> # P4
> simList <- lapply(1:(nReps - 1), bestCollst,
+               ordCUcs[-1], indList, pMat[, 3], 0.9)
> bestInd <- unlist(lapply(simList, which.max))
> trash <- sapply(1:(nReps - 1), addCol, 3,
+               Ngrp, ordCUcs)
> # P2
> bestInd <- rep(1, nReps - 1)
> trash <- sapply(1:(nReps - 1), addCol, 2,
+               Ngrp, ordCUcs)
> pMat <- t(apply(pMat, 1, normalizeP))
> pMat <- pMat[cuPheno$NSFTV_ID %in% cuPCP$NSFTV_ID, ]
> cuPCP <- cuPCP[, cu3cor := paste0("P", apply(pMat, 1, which.max))]
> cuPCP <- cuPCP[, cu3cor := ifelse(cu3cor == "P3", "P4", cu3cor)]
> pGrpSan <- as.data.table(make_long(cuPCP, GRIN_spp, cu3cor, cu3, newGrp23))
> sankeyLevels0 <- c("0. nivara", "Oryza spp.", "O. rufipogon",
+               c("P4", "P2/P3", "P2", "P1"))
> pGrpSan <- pGrpSan[, node := factor(node, levels = sankeyLevels0)]
> pGrpSan <- pGrpSan[, next_node := factor(next_node, levels = sankeyLevels0)]
```

Plot.

```
> pdfFlNam <- "sankeyPGrpCUcor.pdf"
> showtext_auto()
> ggplot(data = pGrpSan, aes(x = x, next_x = next_x, node = node, next_node = next_node,
+                             fill = node, label = node)) +
+   geom_sankey(flow.alpha = 0.6, node.color = "grey30") +
+   geom_sankey_label(size = 5, color = "grey20", fill = "grey90", alpha = 0.8,
+                     label = c(expression(italic("O. nivara")),
+                               expression(italic("Oryza spp.")),
+                               expression(italic("O. rufipogon")),
+                               "P4", "P2", "P1", "P4", "P2", "P1",
+                               "P4", "P2/P3", "P1")) +
+   scale_fill_manual(values = pGrp8Colors) +
+   scale_x_discrete(labels = c("species",
+                               "Cornell\ncorrelation (7)",
+                               "Cornell\nall traits",
+                               "IRRI\nall traits")) +
+   theme_sankey(base_size = 20, base_family = "myriad") +
+   theme(strip.background = element_rect(fill = "grey95", linetype = "blank"),
+         legend.position = "none", axis.title = element_blank())
> ggsave(pdfFlNam, width = 8, height = 6, units = "in",
+         device = "pdf", useDingbats = FALSE)
> cat("\\\\includegraphics[width=0.9\\textwidth]{", pdfFlNam, "}\n\n", sep = "")
```

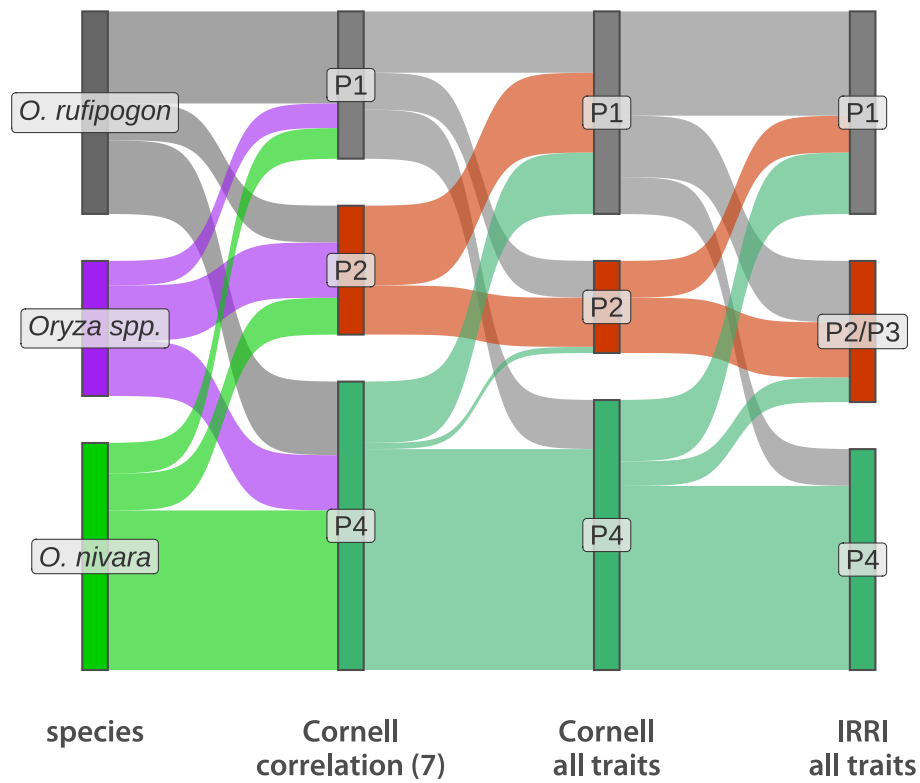

Supplement: Data_Sheet_1.ZIP [file mixtureModel.pdf › mixtureModel.pdf]
