# Supplementary material for: Phenotypic Variation and the Impact of Admixture in the Oryza rufipogon Species Complex (ORSC)
Source: Frontiers journal article supplement (doi:10.3389/fpls.2022.787703), 2022-06-13
Supplement: Data_Sheet_1.ZIP [file Rplots.pdf › Rplots.pdf]

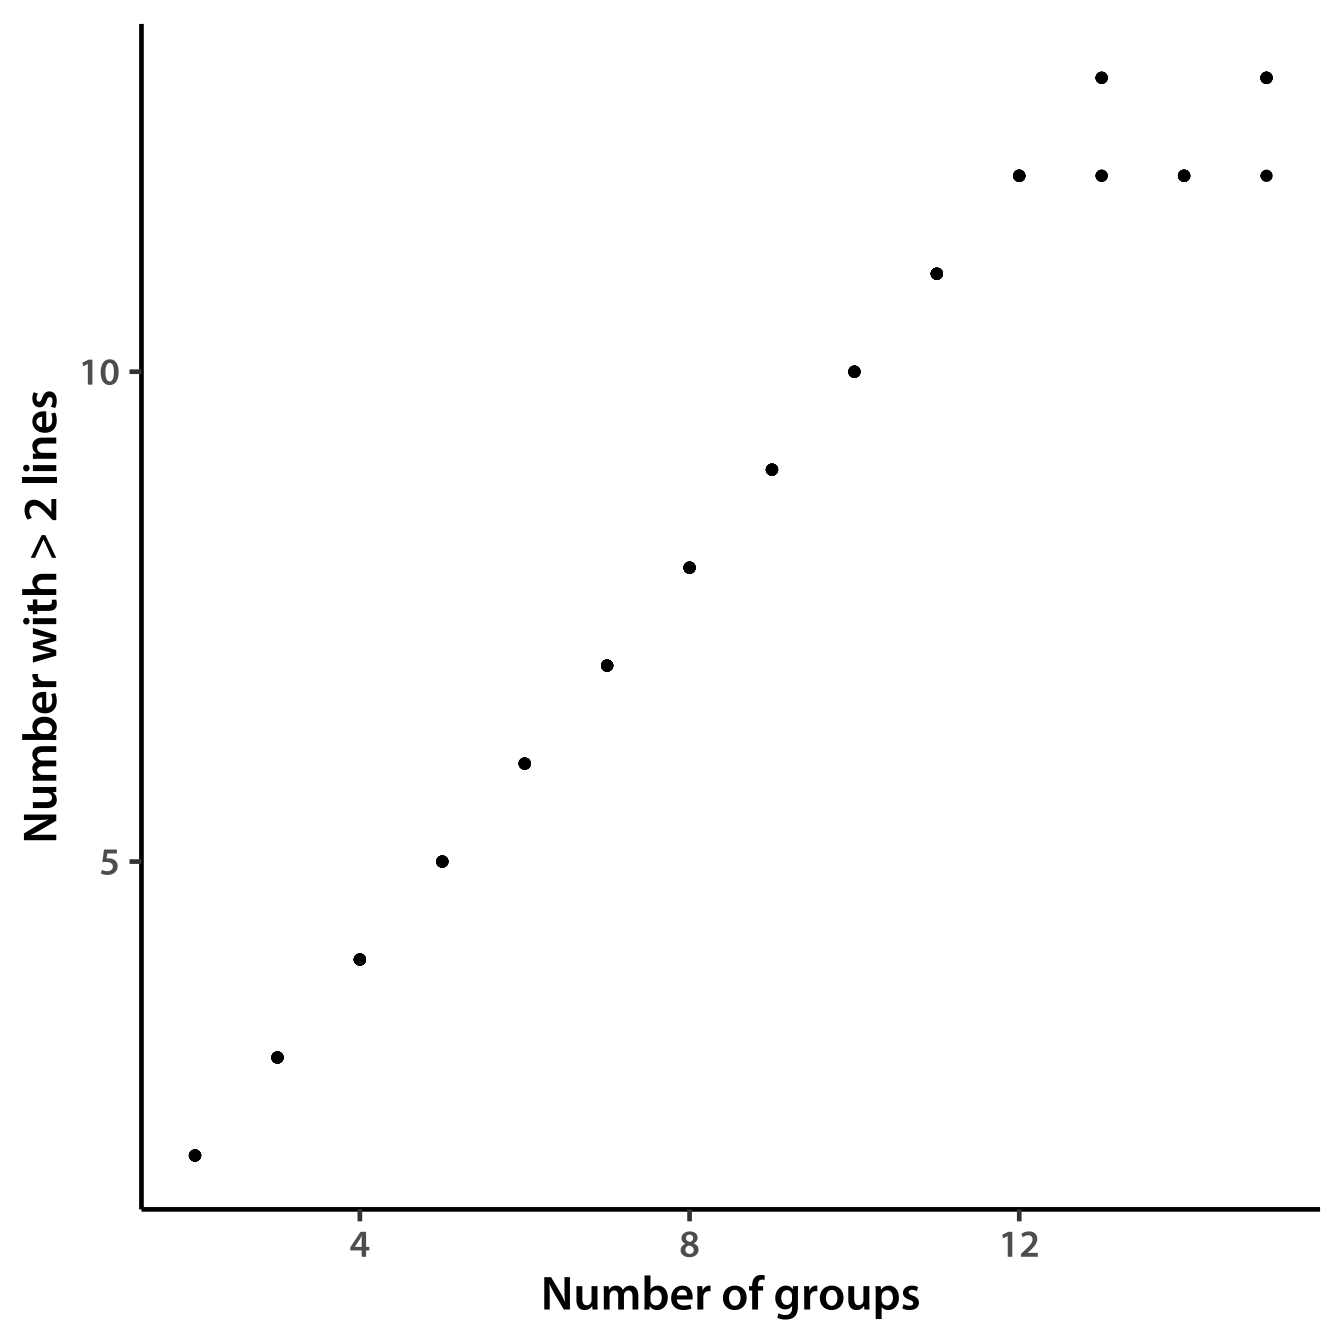

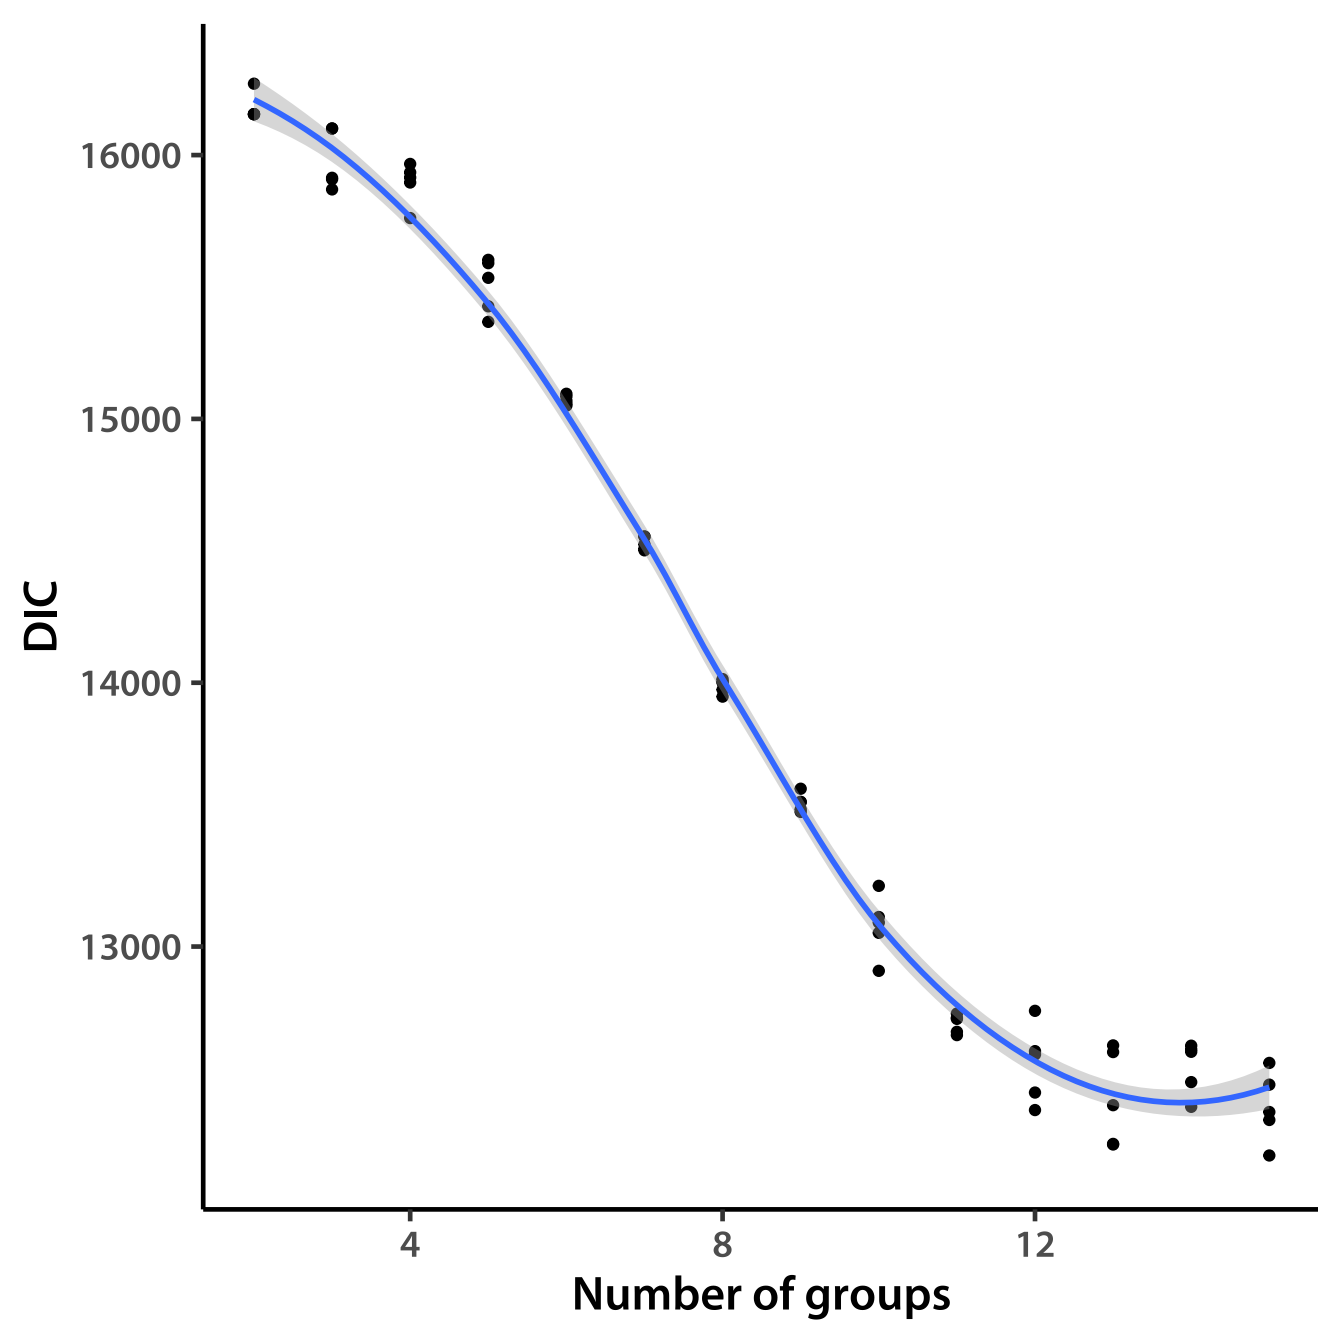

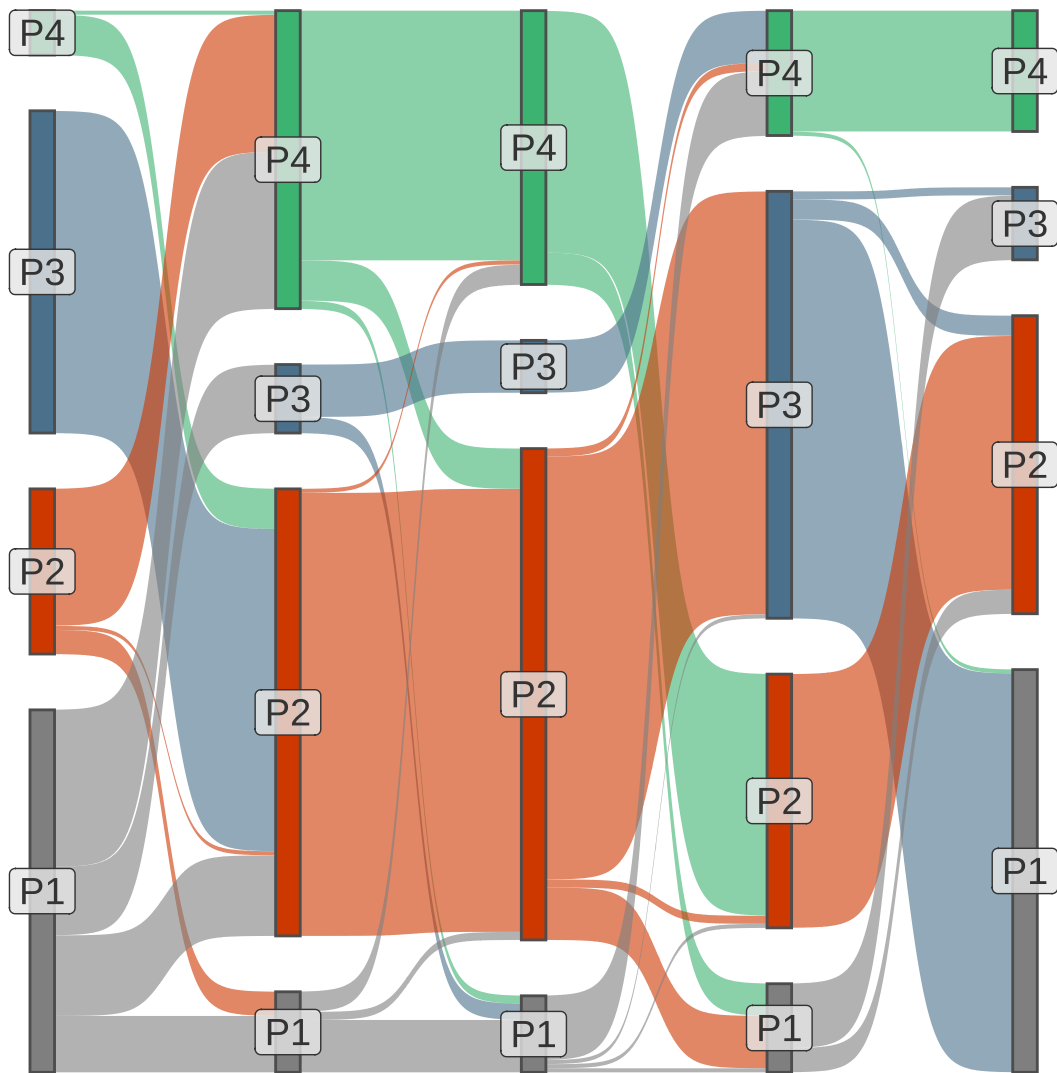

run1

run2

run3

run4

run5

X

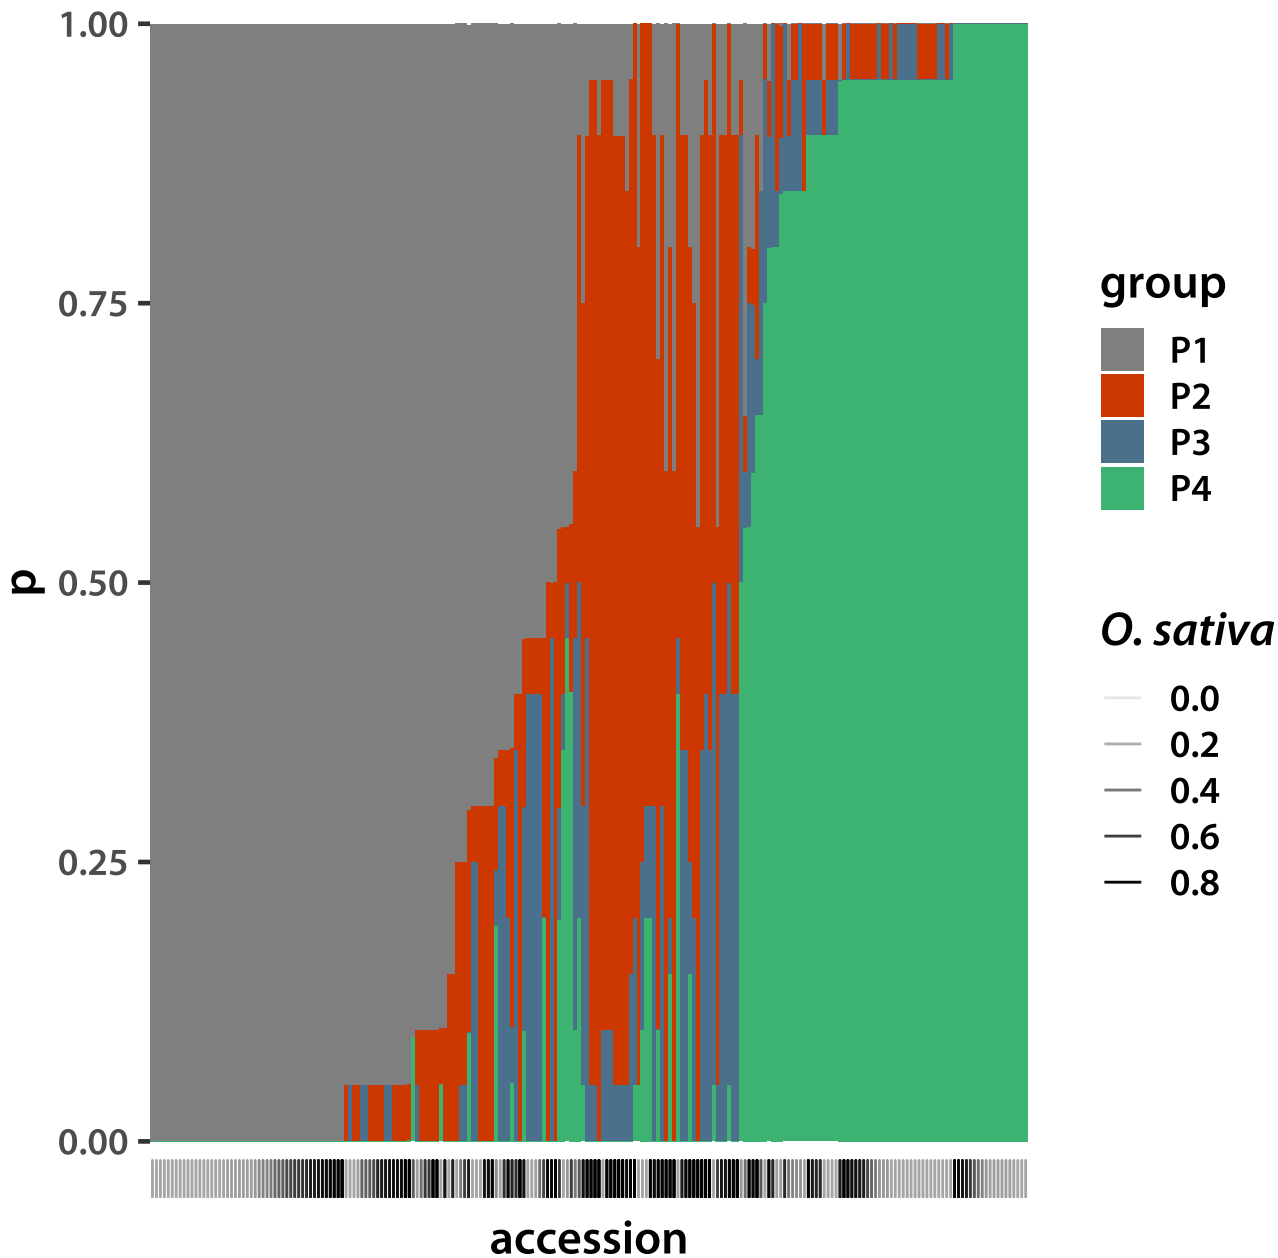

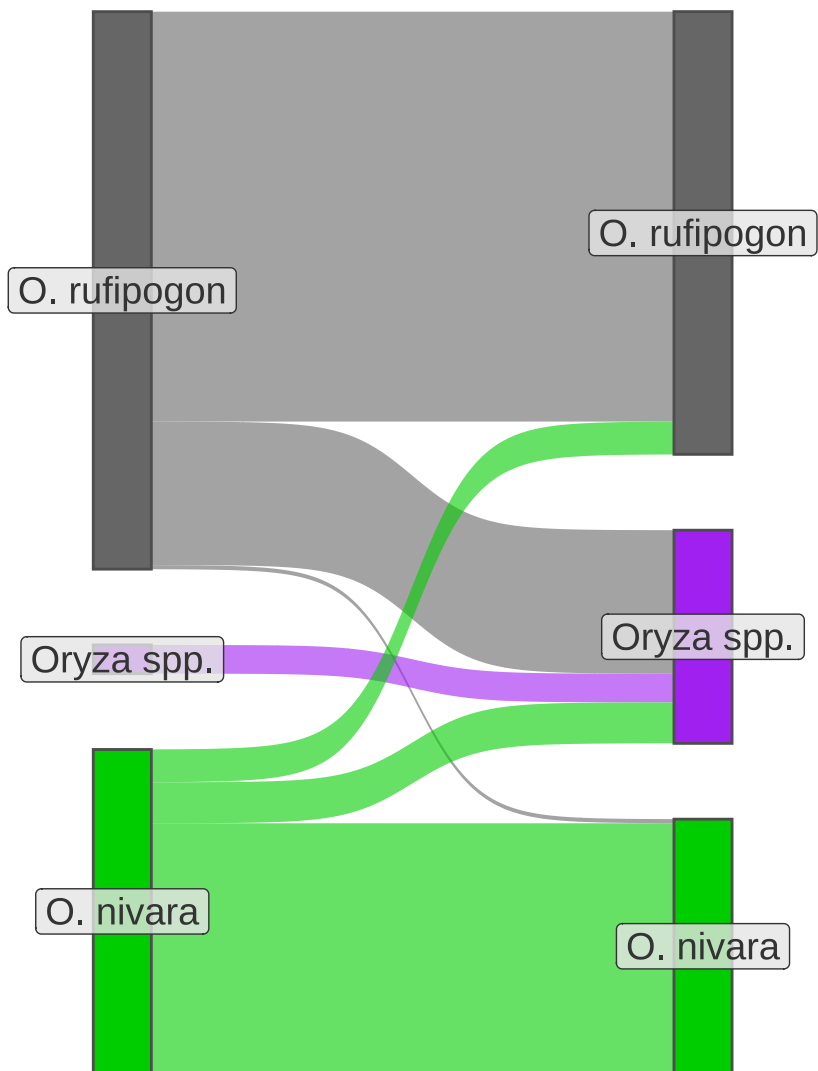

old species

GRIN species

designation

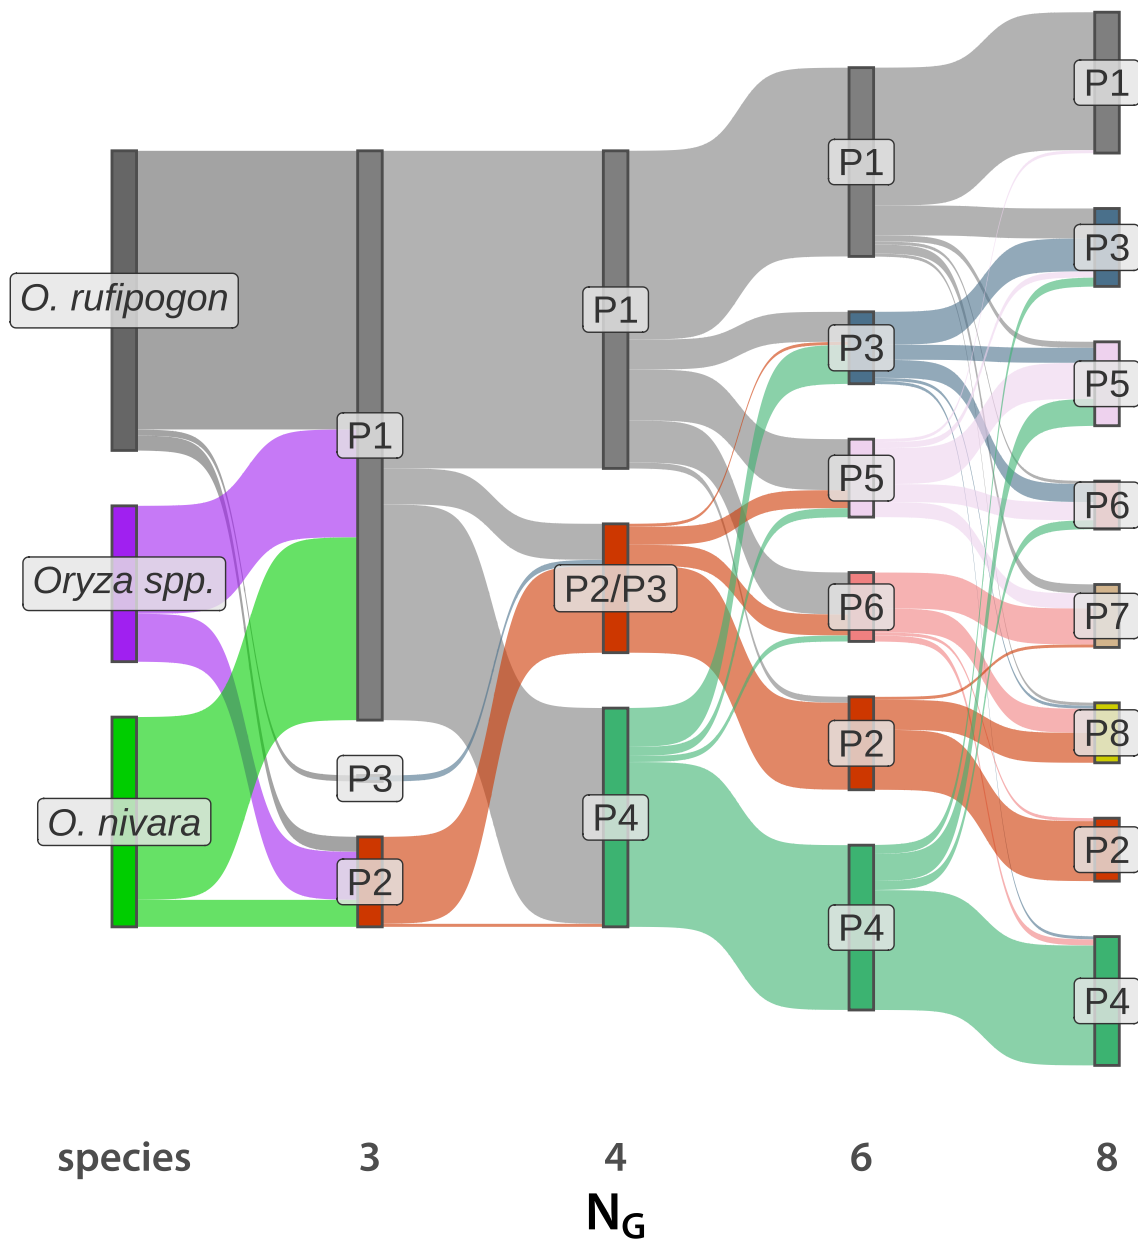

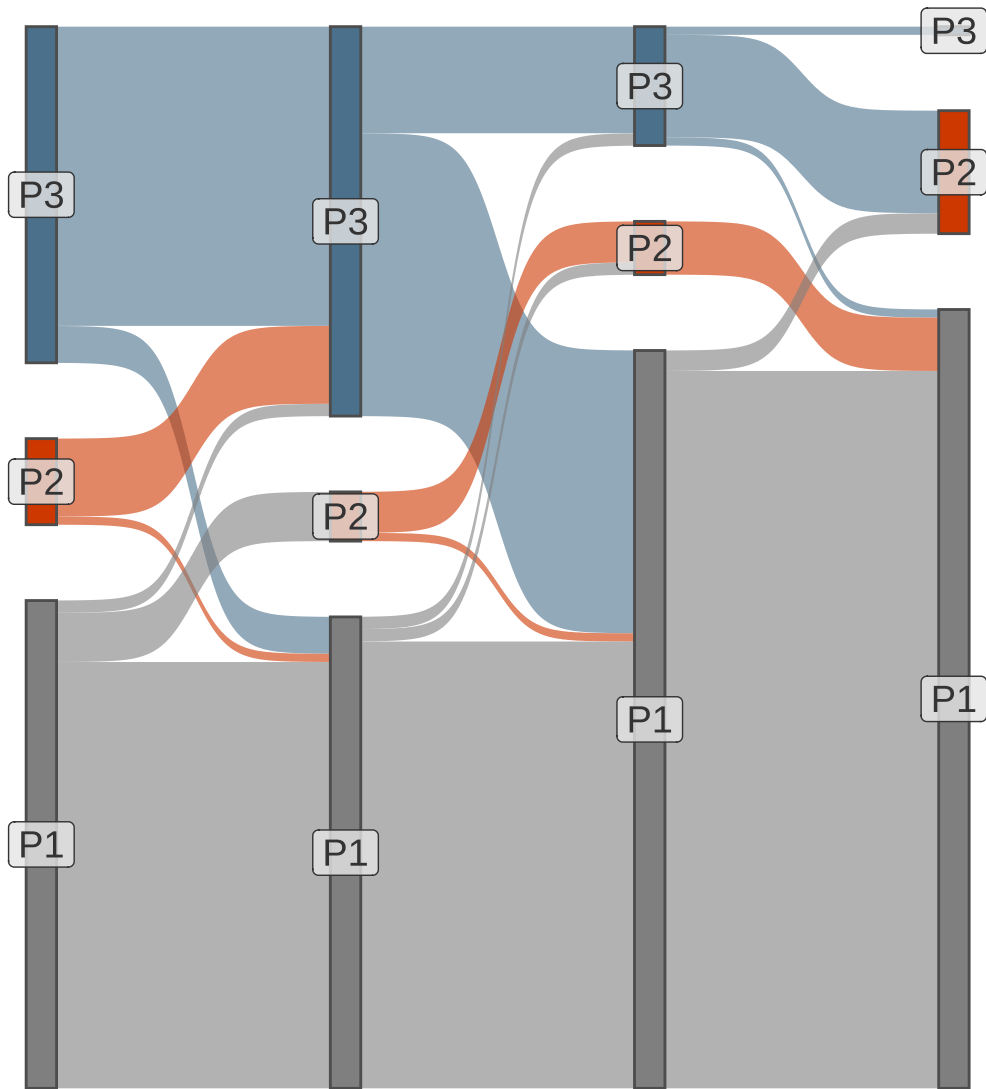

newGrp3s1

newGrp3s2

newGrp3s3

newGrp3

x

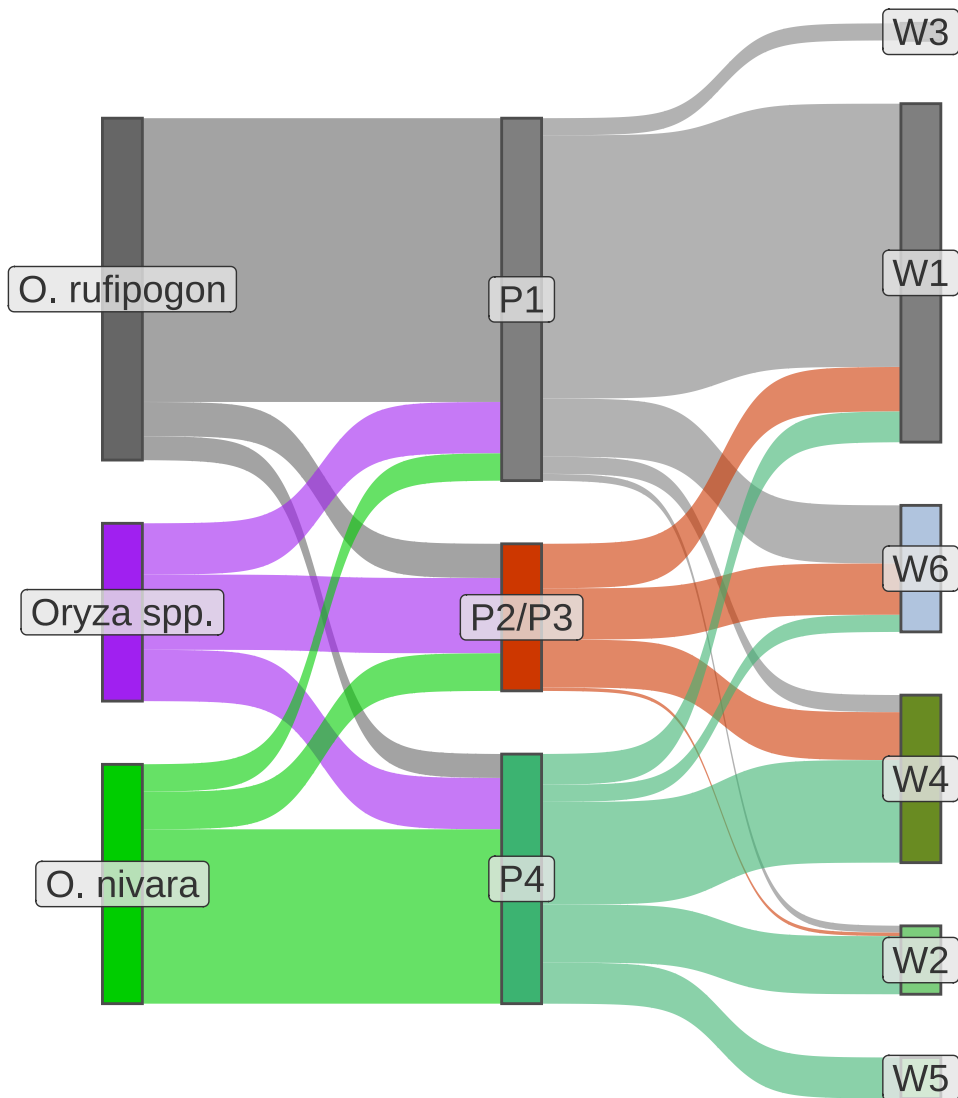

species

phenotypic  
groups

genetic  
subpopulations



subpopulation

|    |    |    |
|----|----|----|
| W1 | W3 | W5 |
| W2 | W4 | W6 |

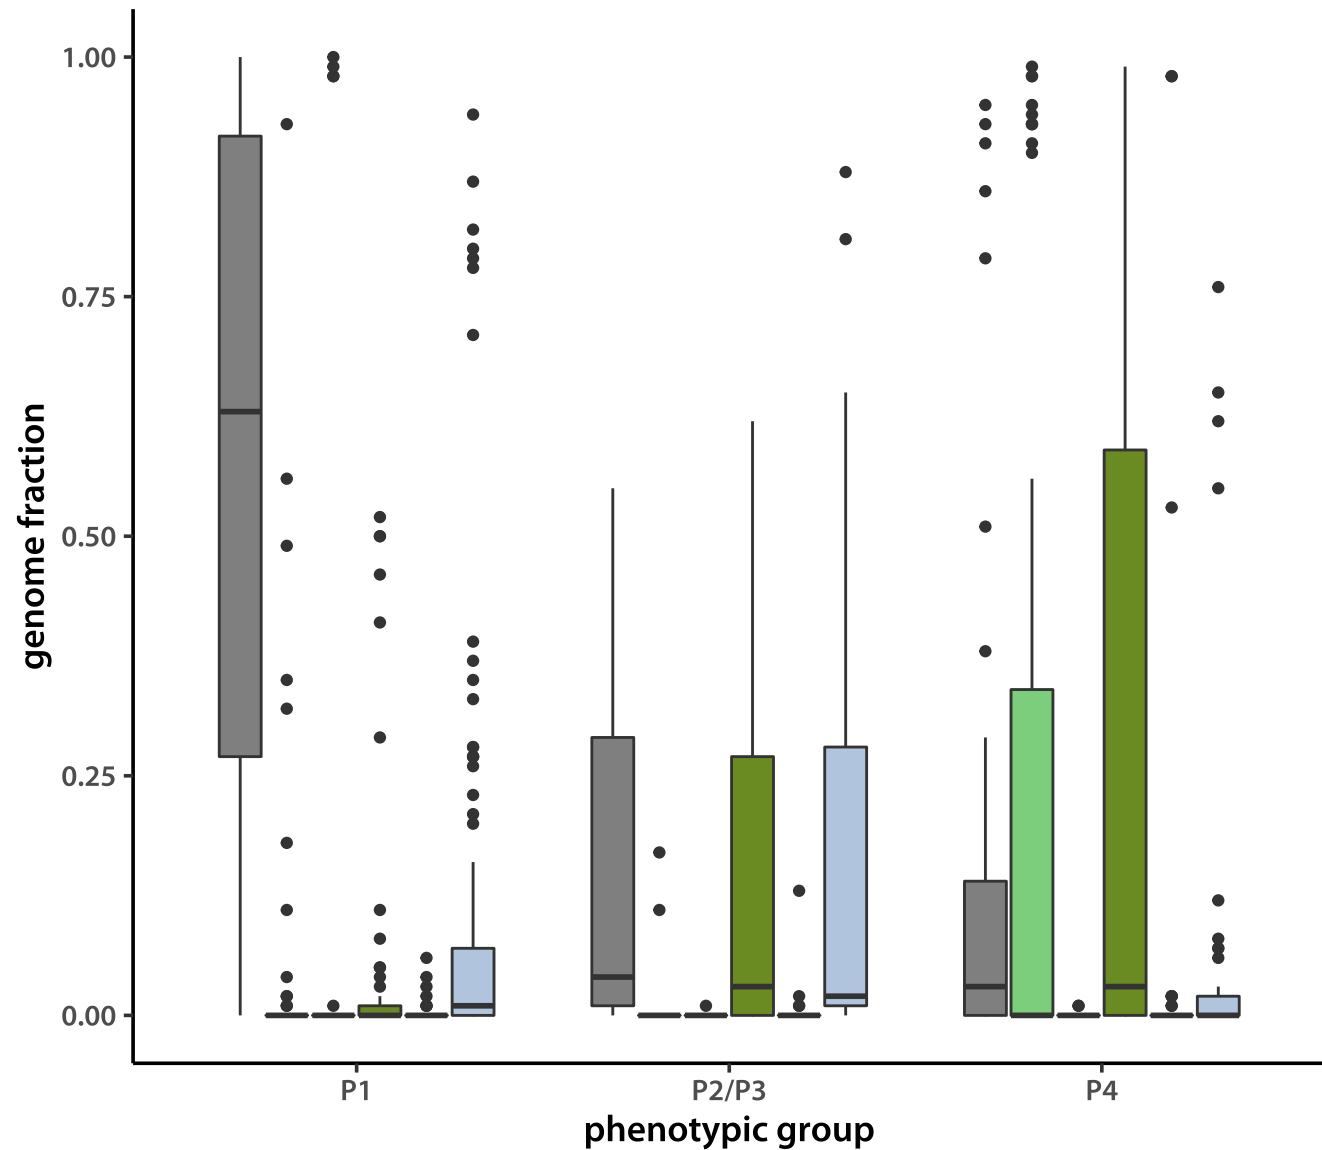

subpopulation

|     |     |     |
|-----|-----|-----|
| ARO | IND | TEJ |
| AUS | TRJ |     |

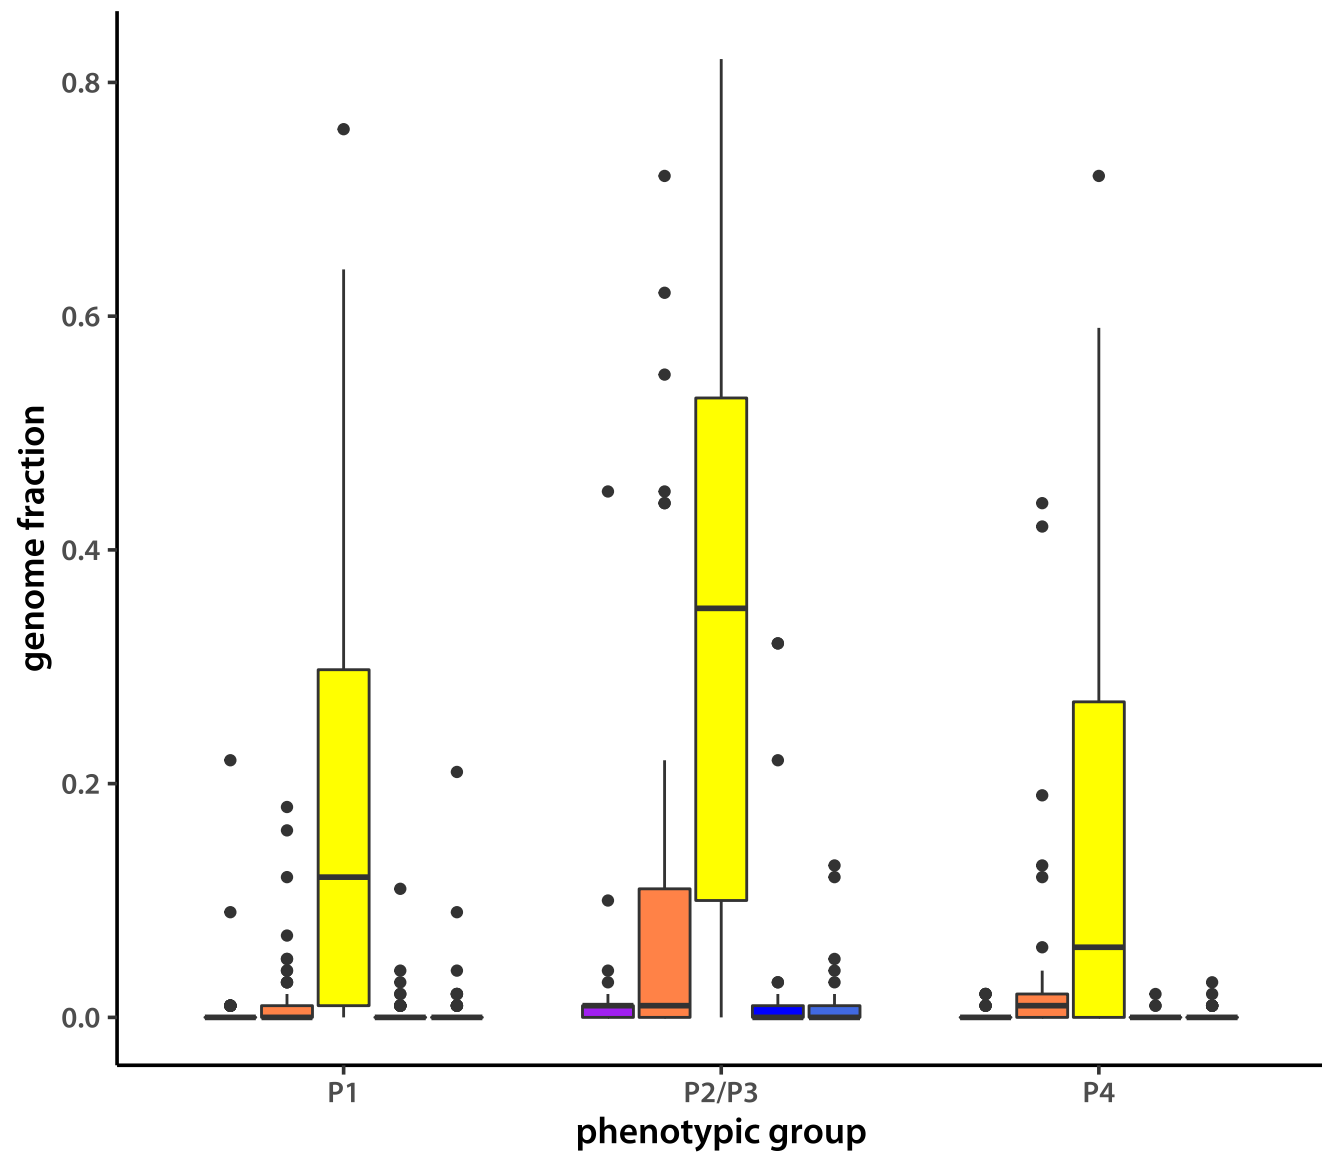

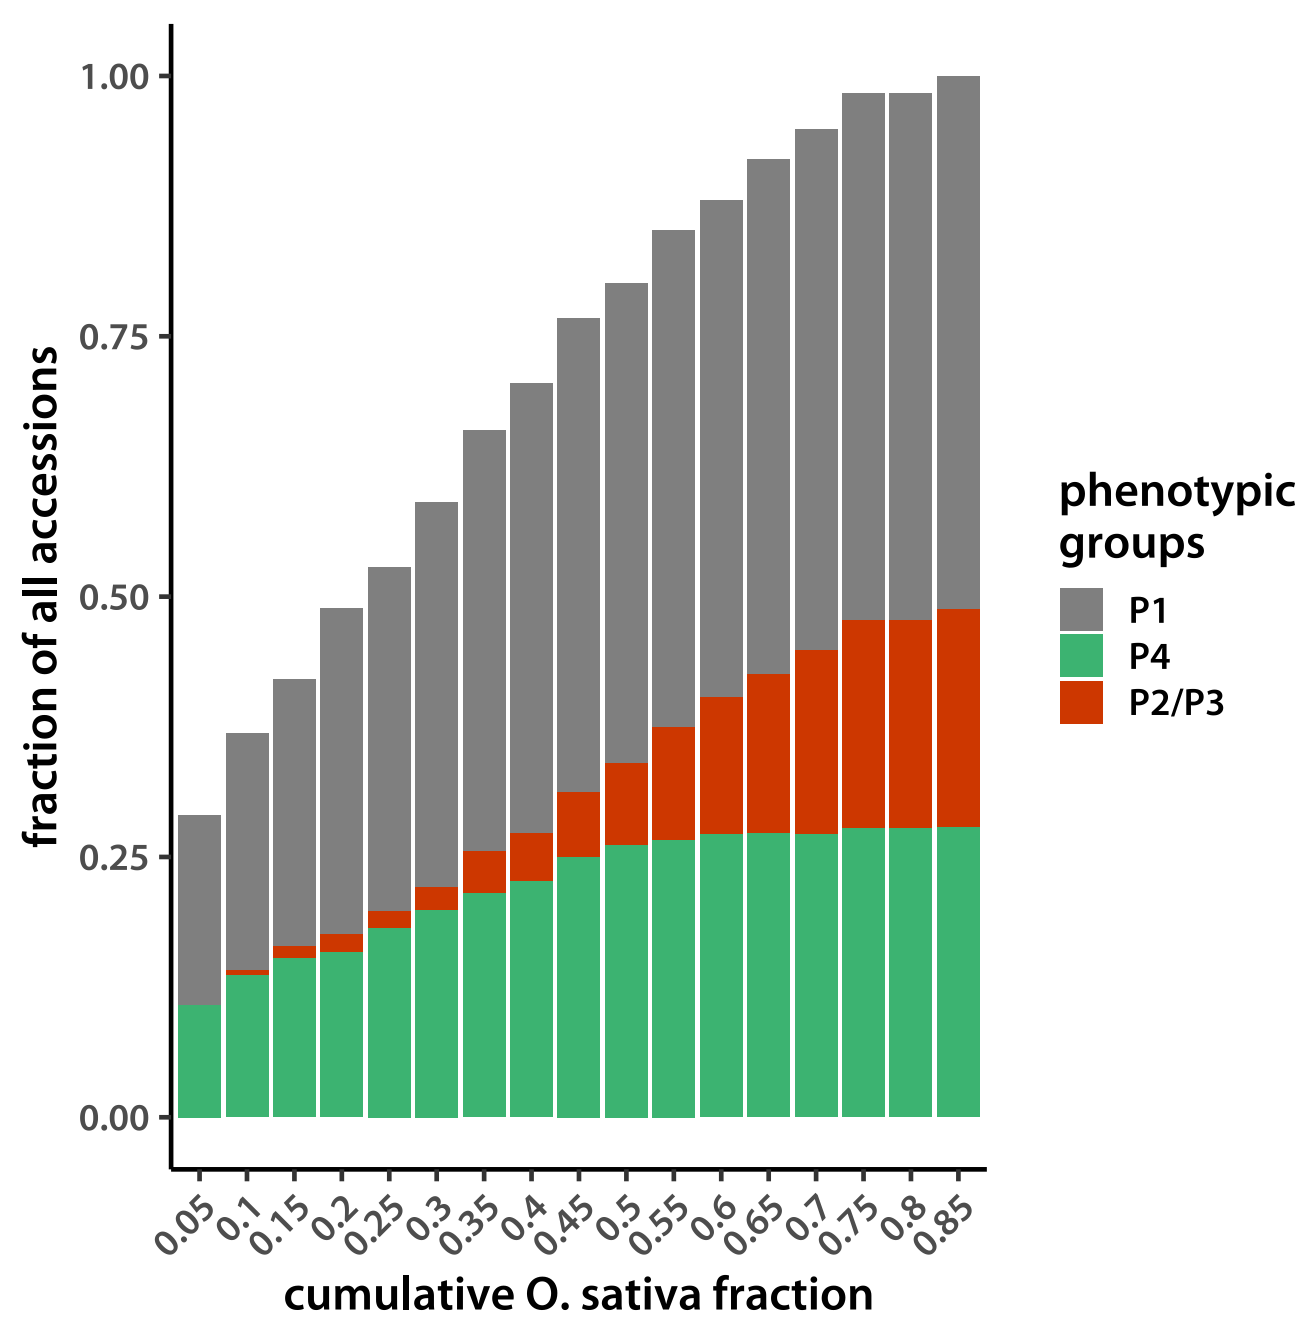

phenotypic group

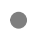

P1

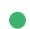

P4

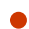

P2/P3

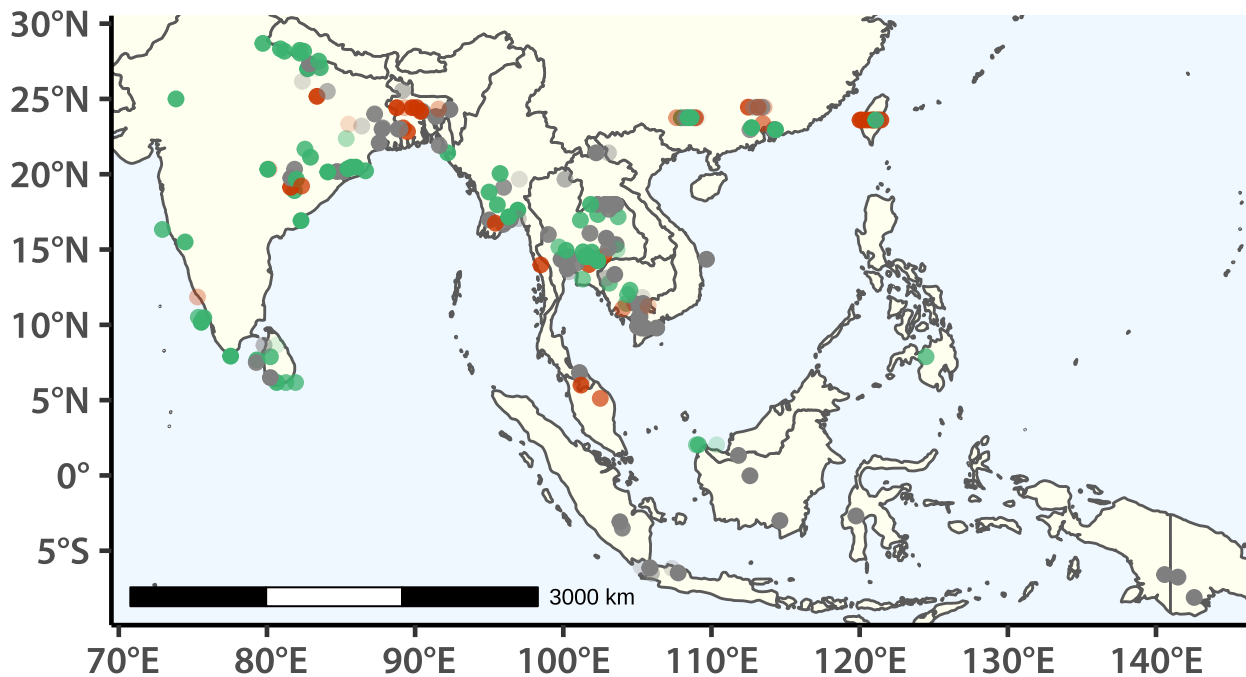

species    ● *O. rufipogon*    ● *O. nivara*

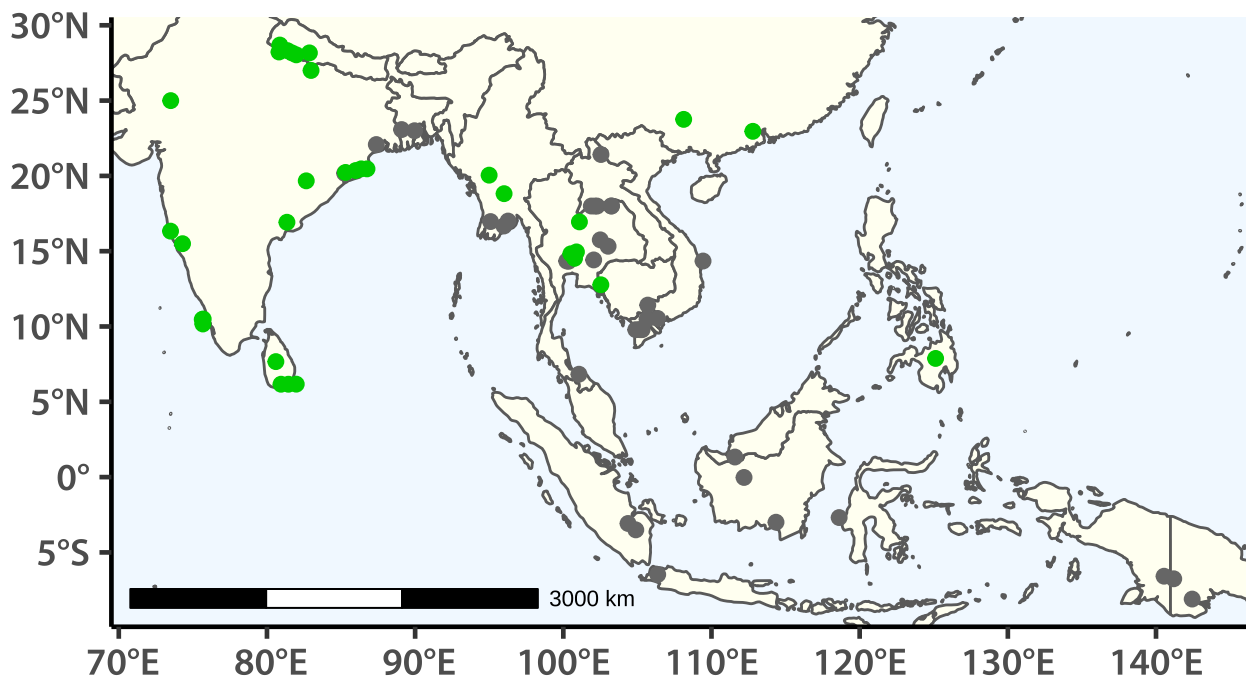

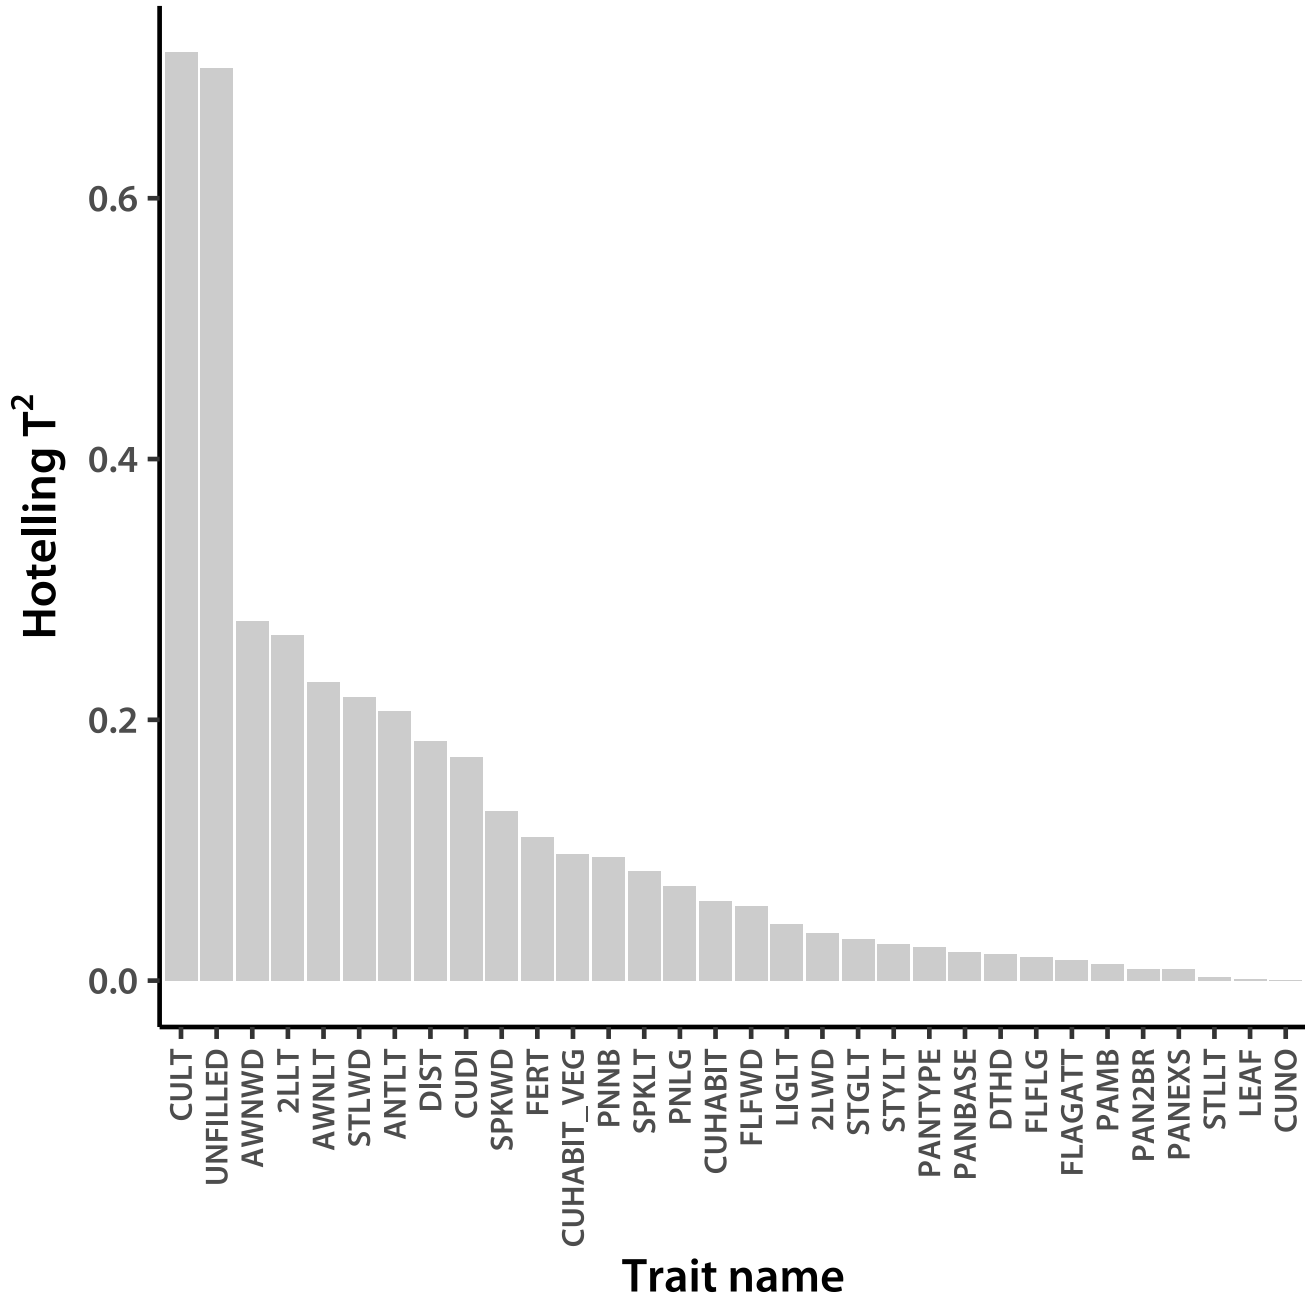

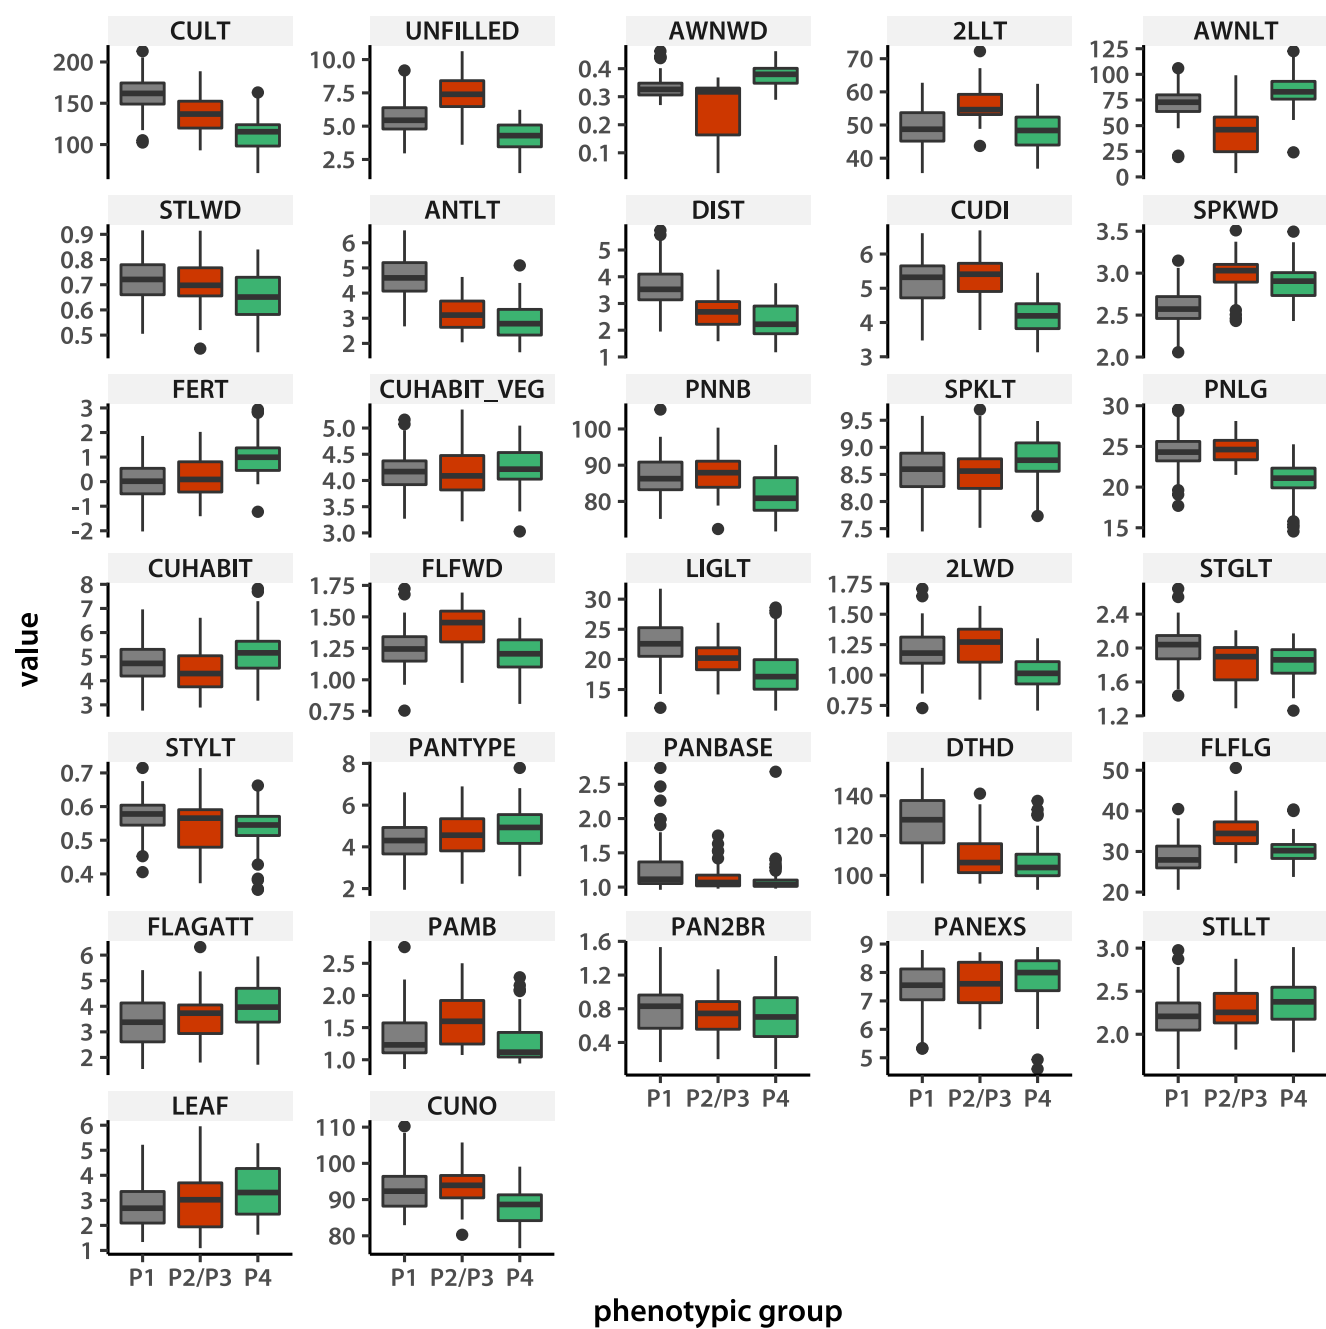

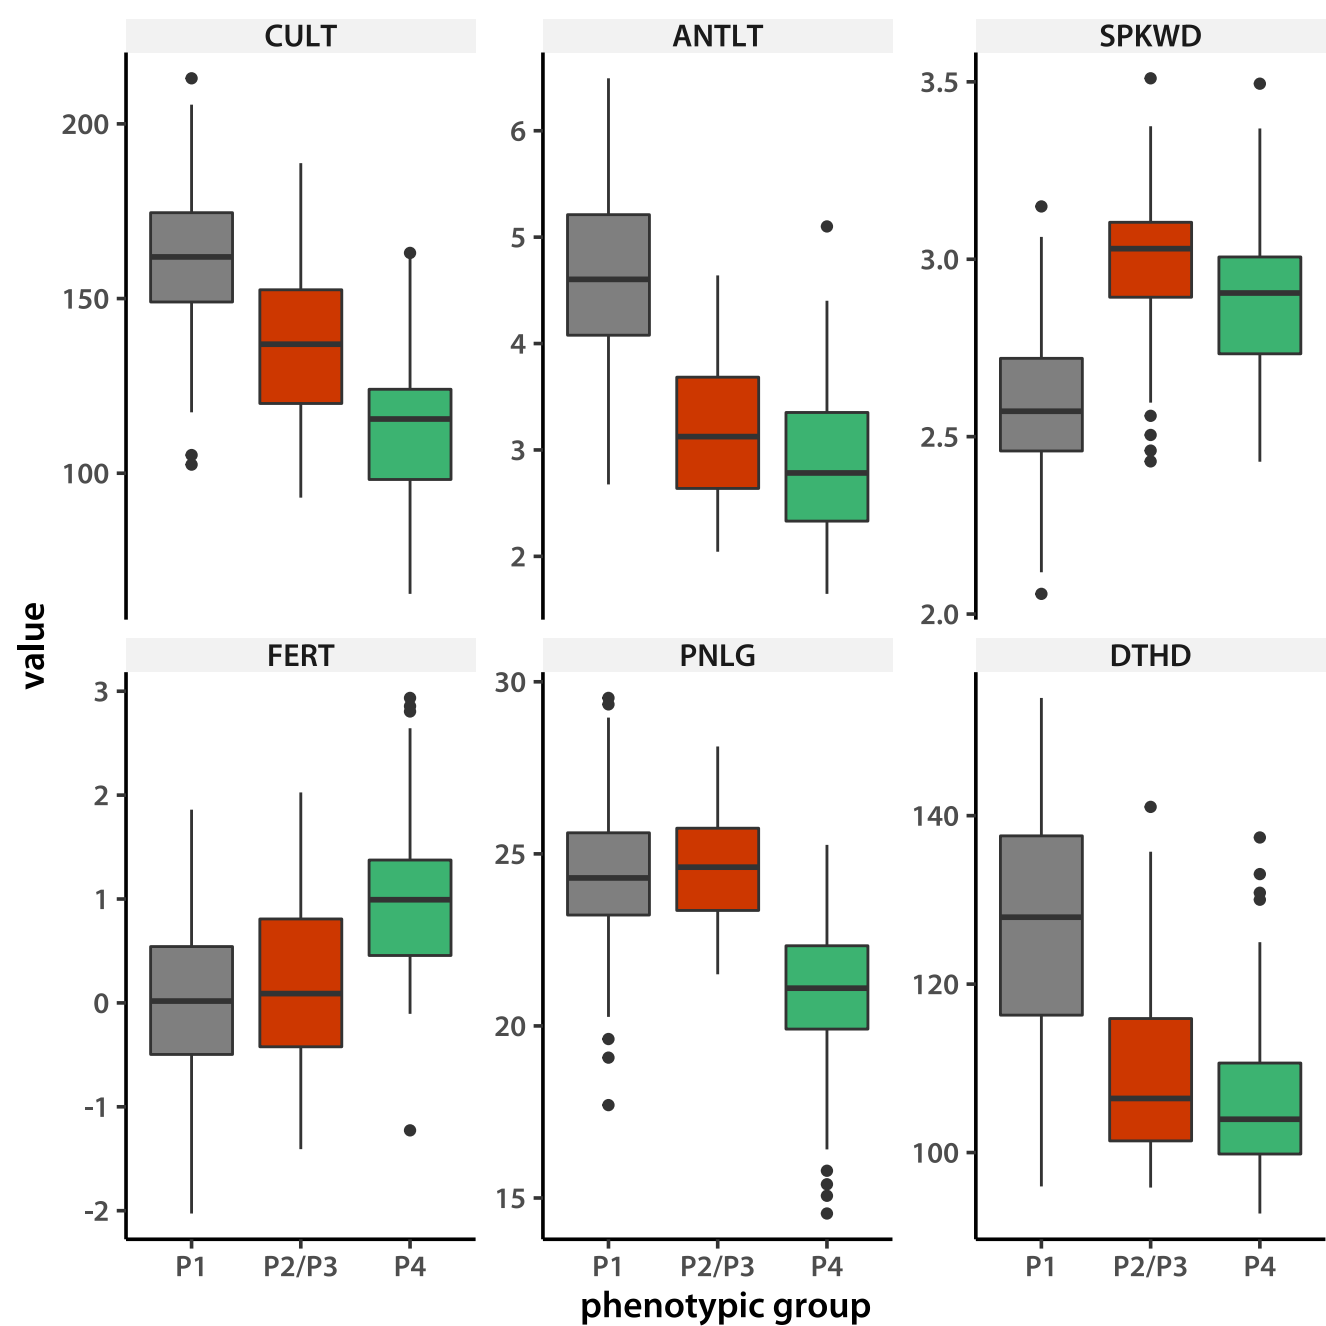



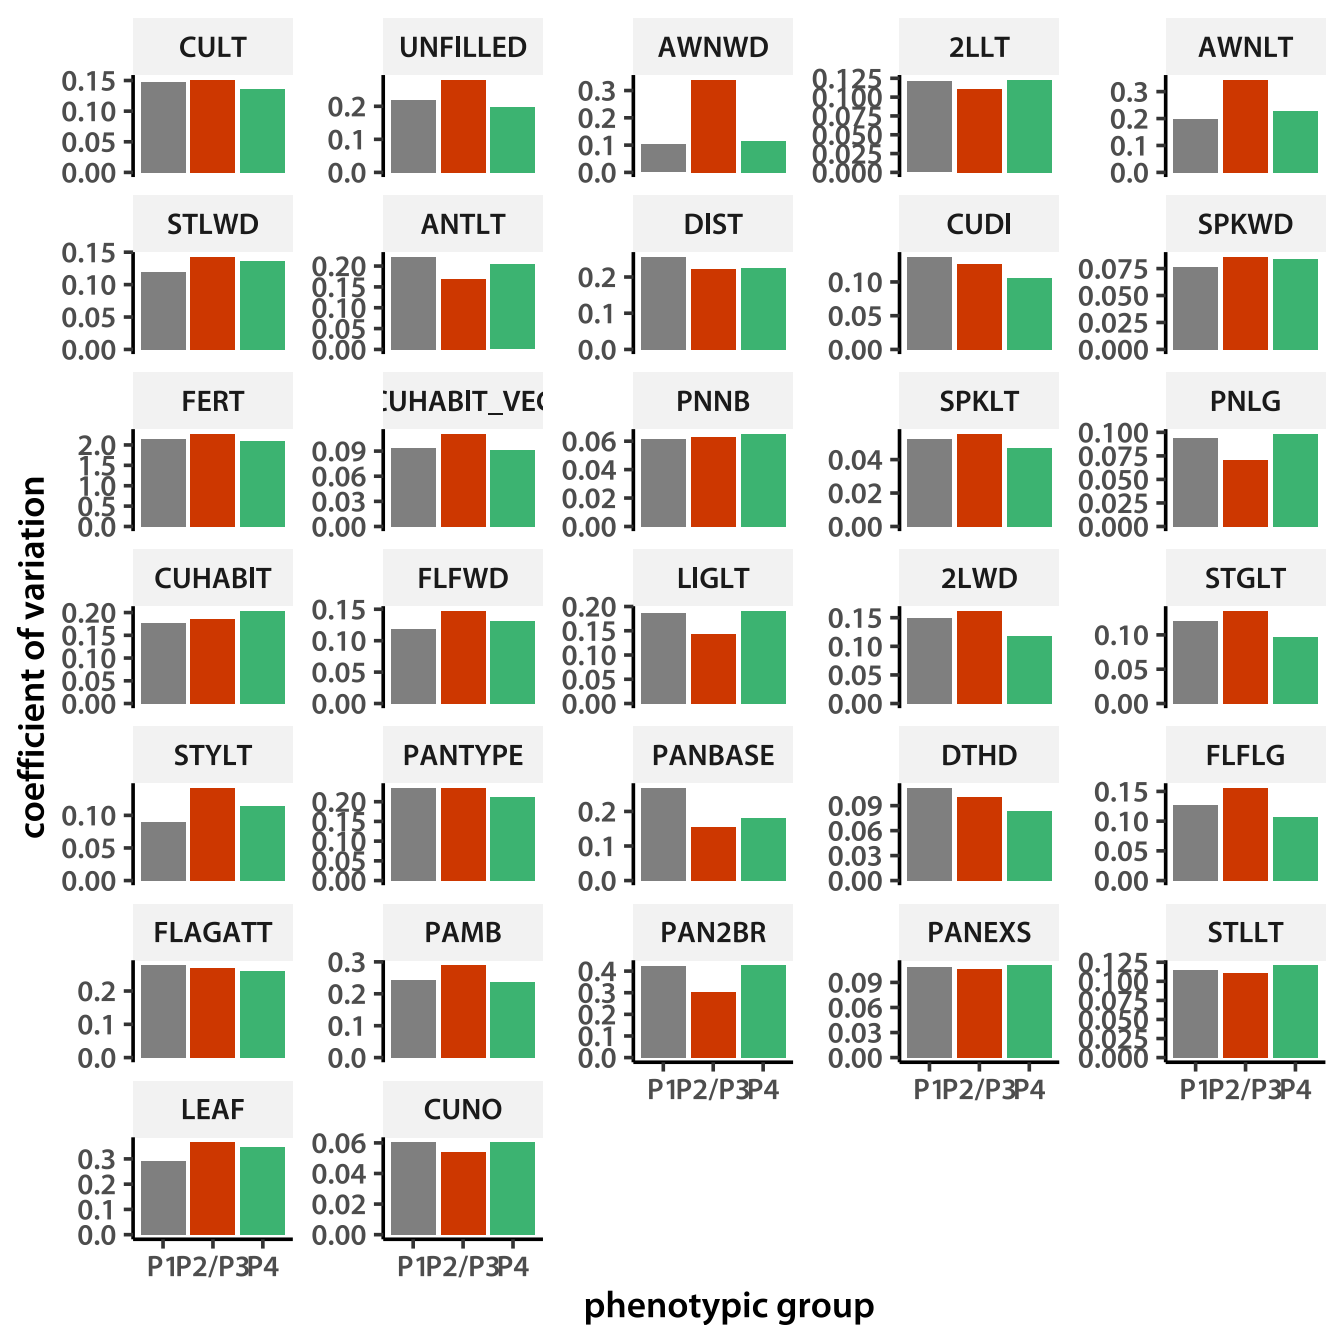

p

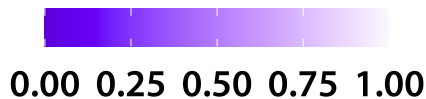

correlation

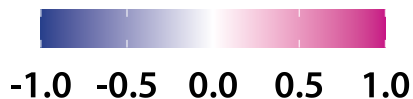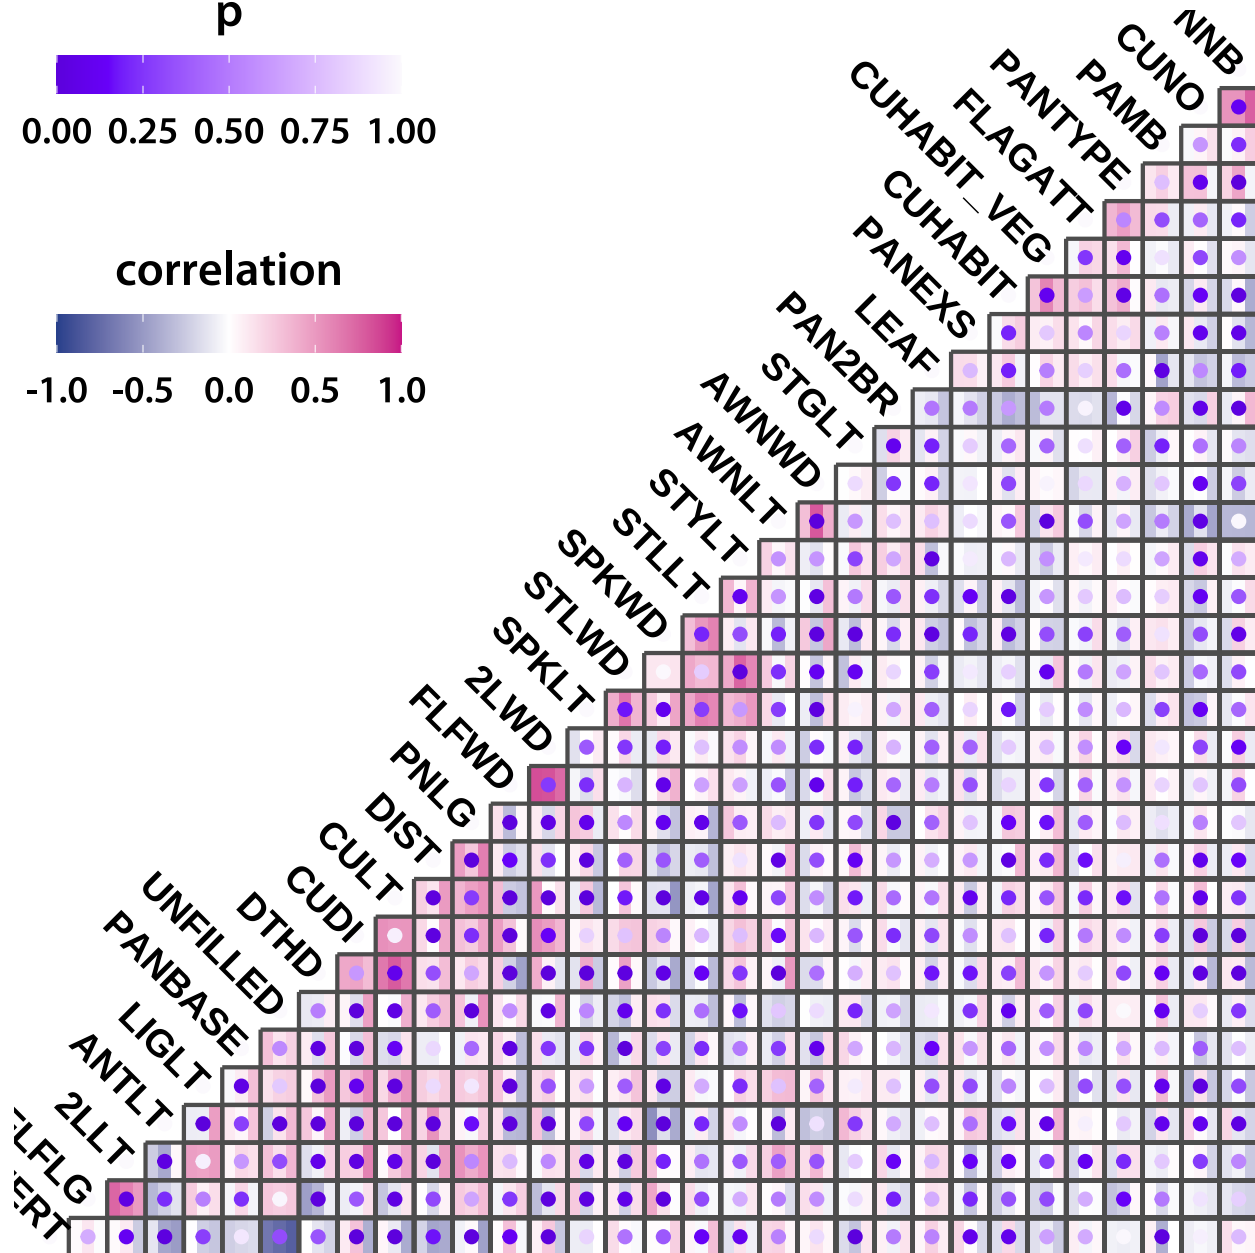

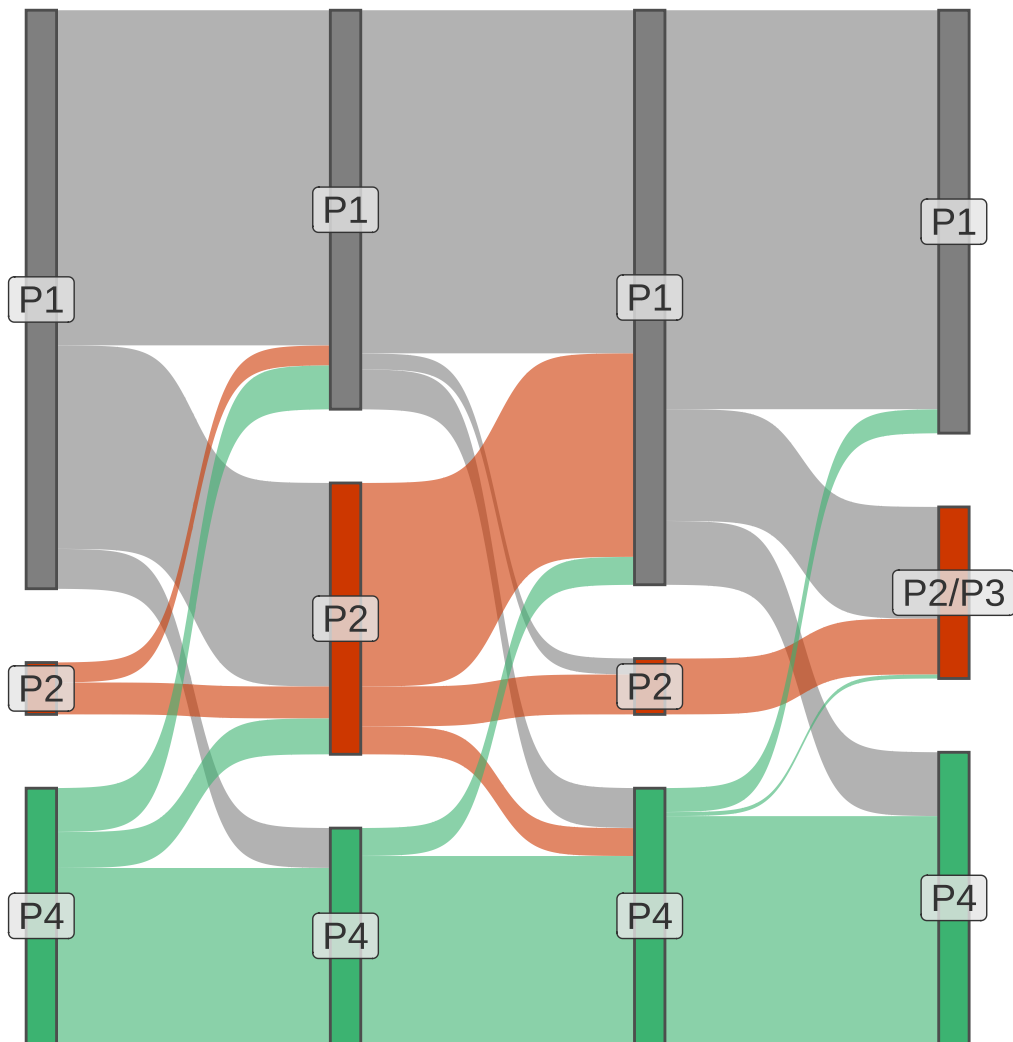

top by  
value  
9 traits

top by  
correlation  
11 traits

value  
+ correlation  
16 traits

all  
data  
32 traits

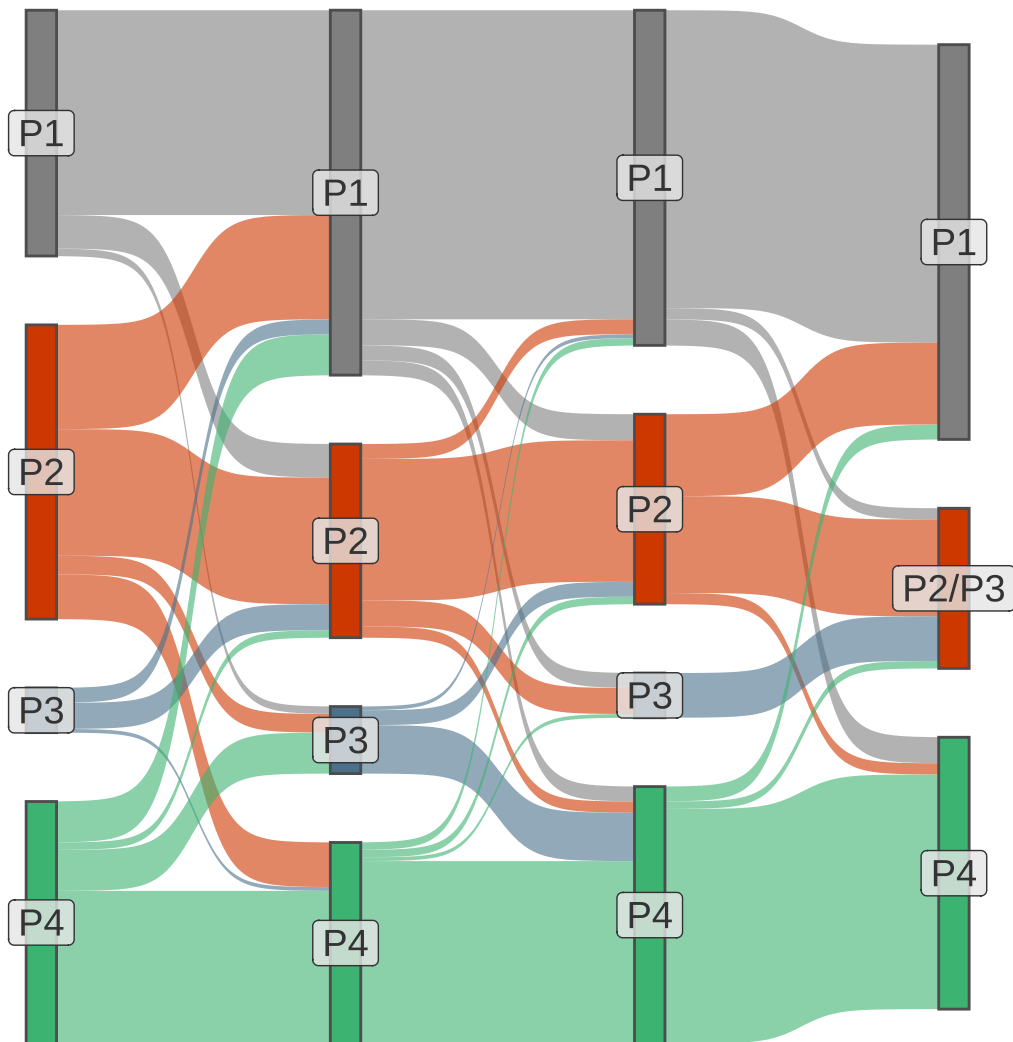

top by  
value  
9 traits

top by  
correlation  
11 traits

value  
+ correlation  
16 traits

all  
data  
32 traits

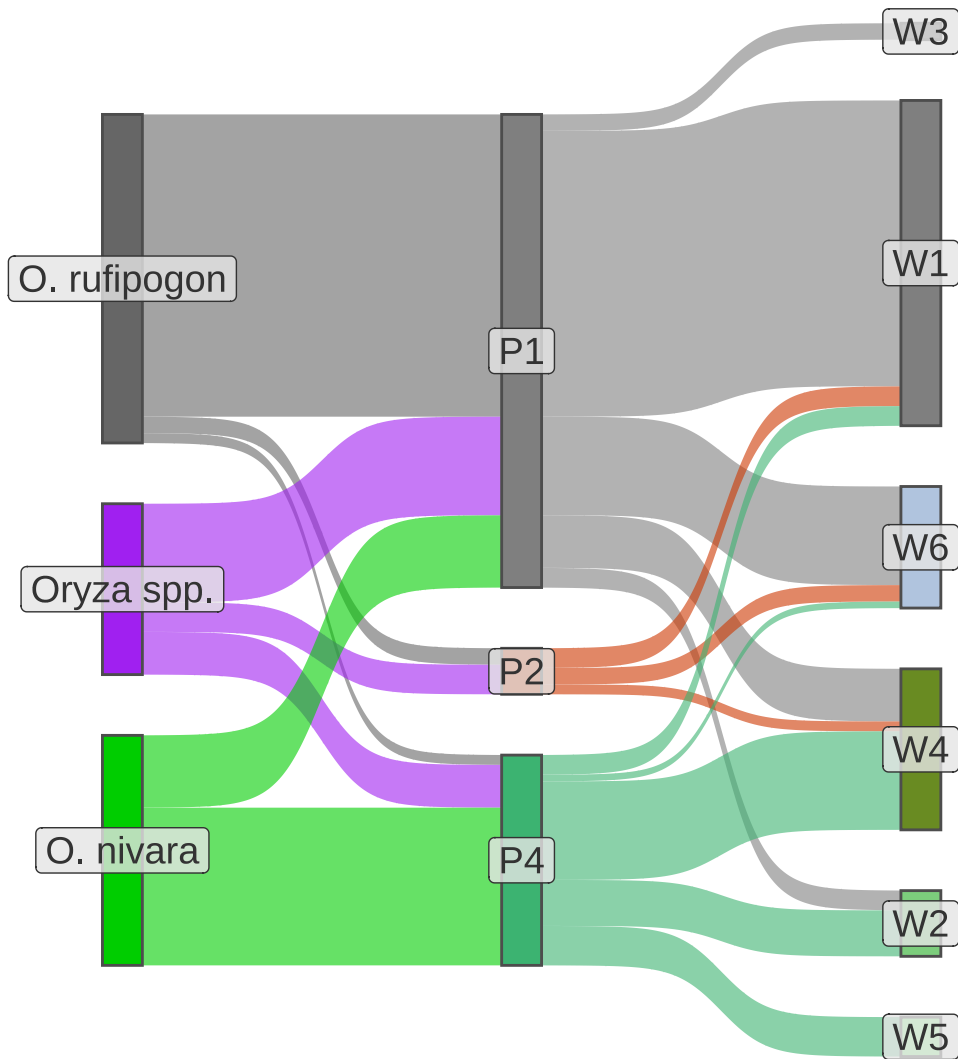

species

phenotypic  
groups  
(16 traits)

genetic  
subpopulations

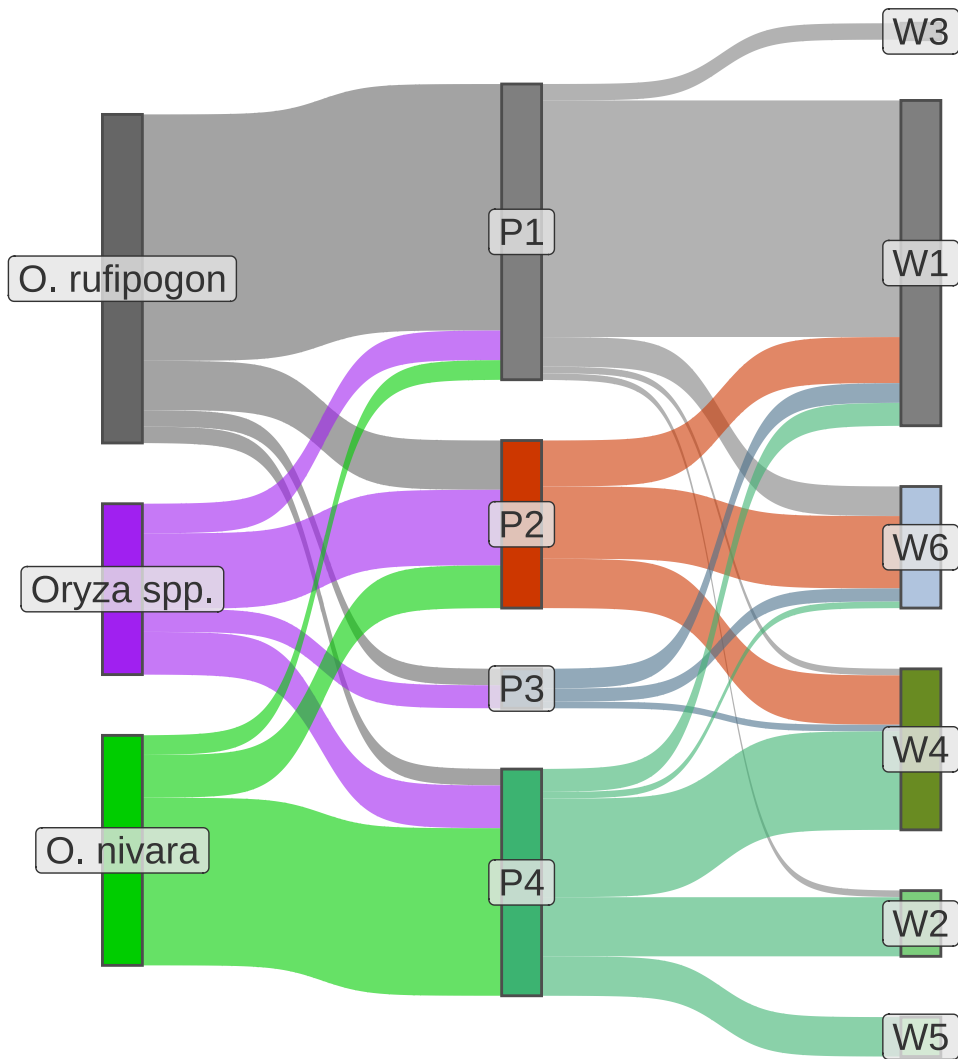

species

phenotypic  
groups  
(16 traits)

genetic  
subpopulations

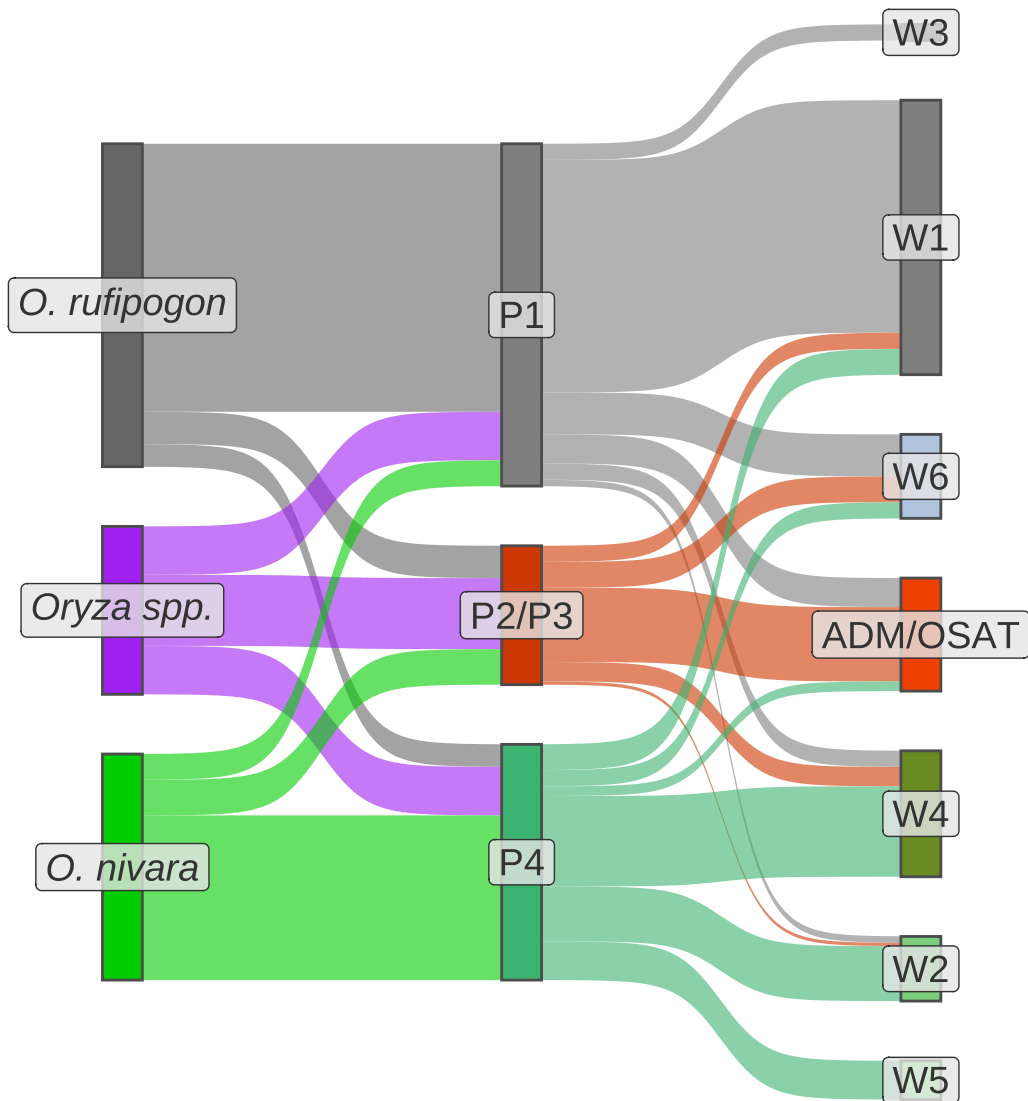

species

phenotypic  
groups

genetic  
subpopulations

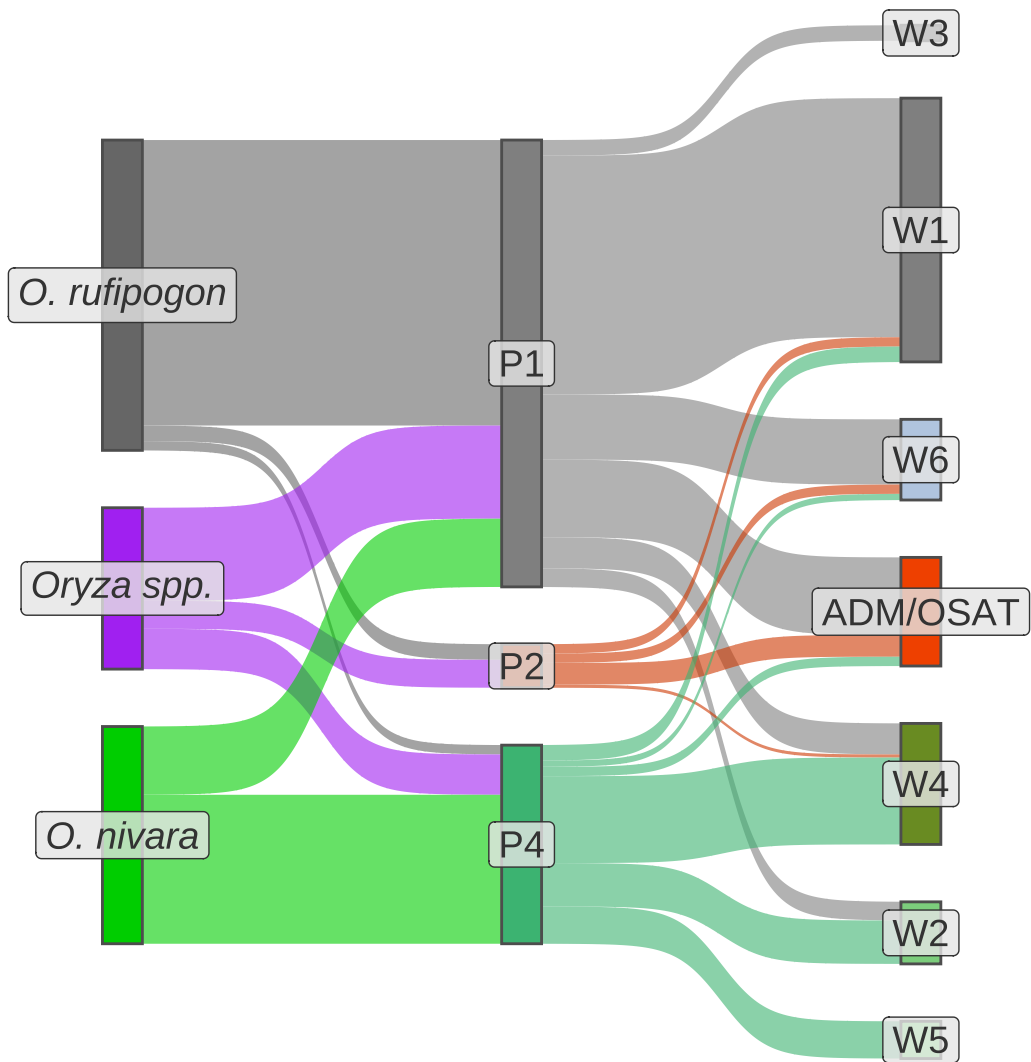

species

phenotypic  
groups  
(16 traits)

genetic  
subpopulations



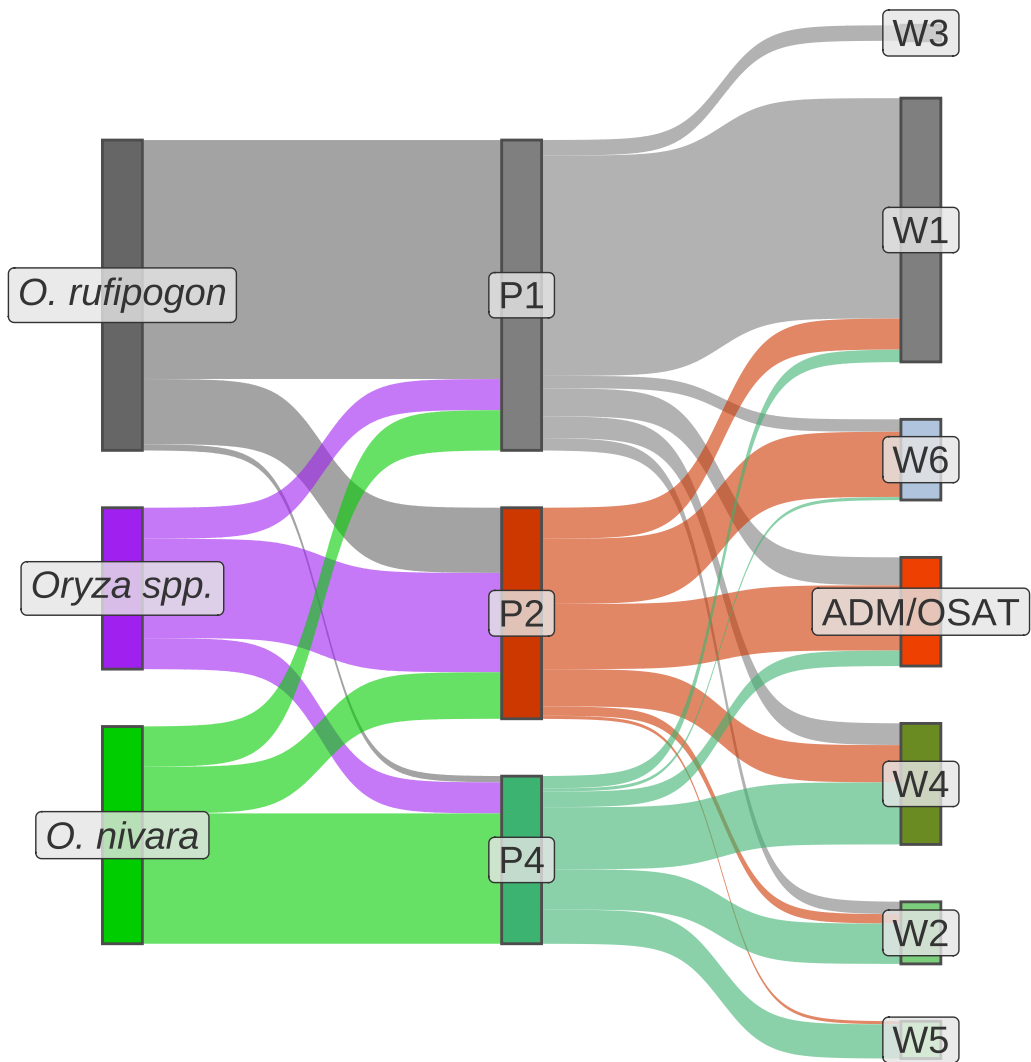

species

phenotypic  
groups  
(11 traits)

genetic  
subpopulations

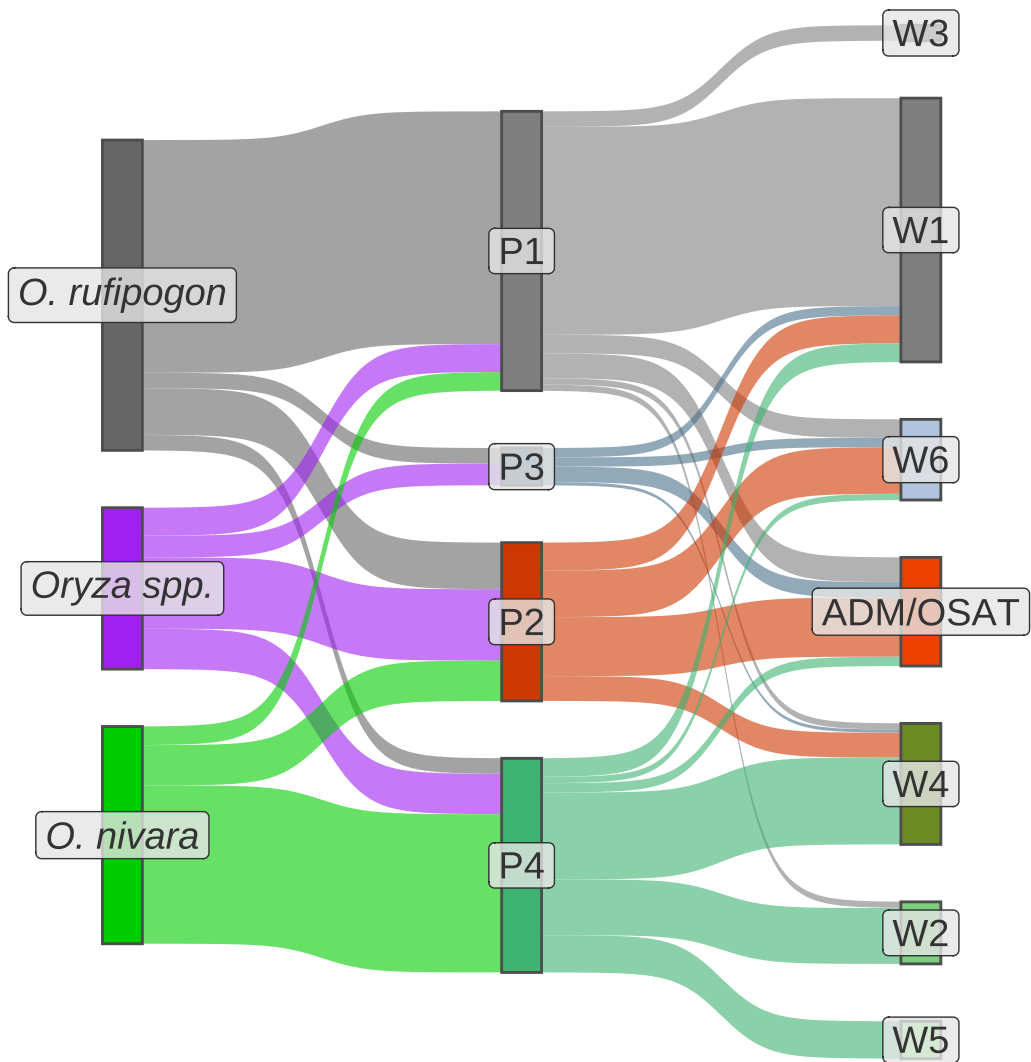

species

phenotypic  
groups  
(16 traits)

genetic  
subpopulations

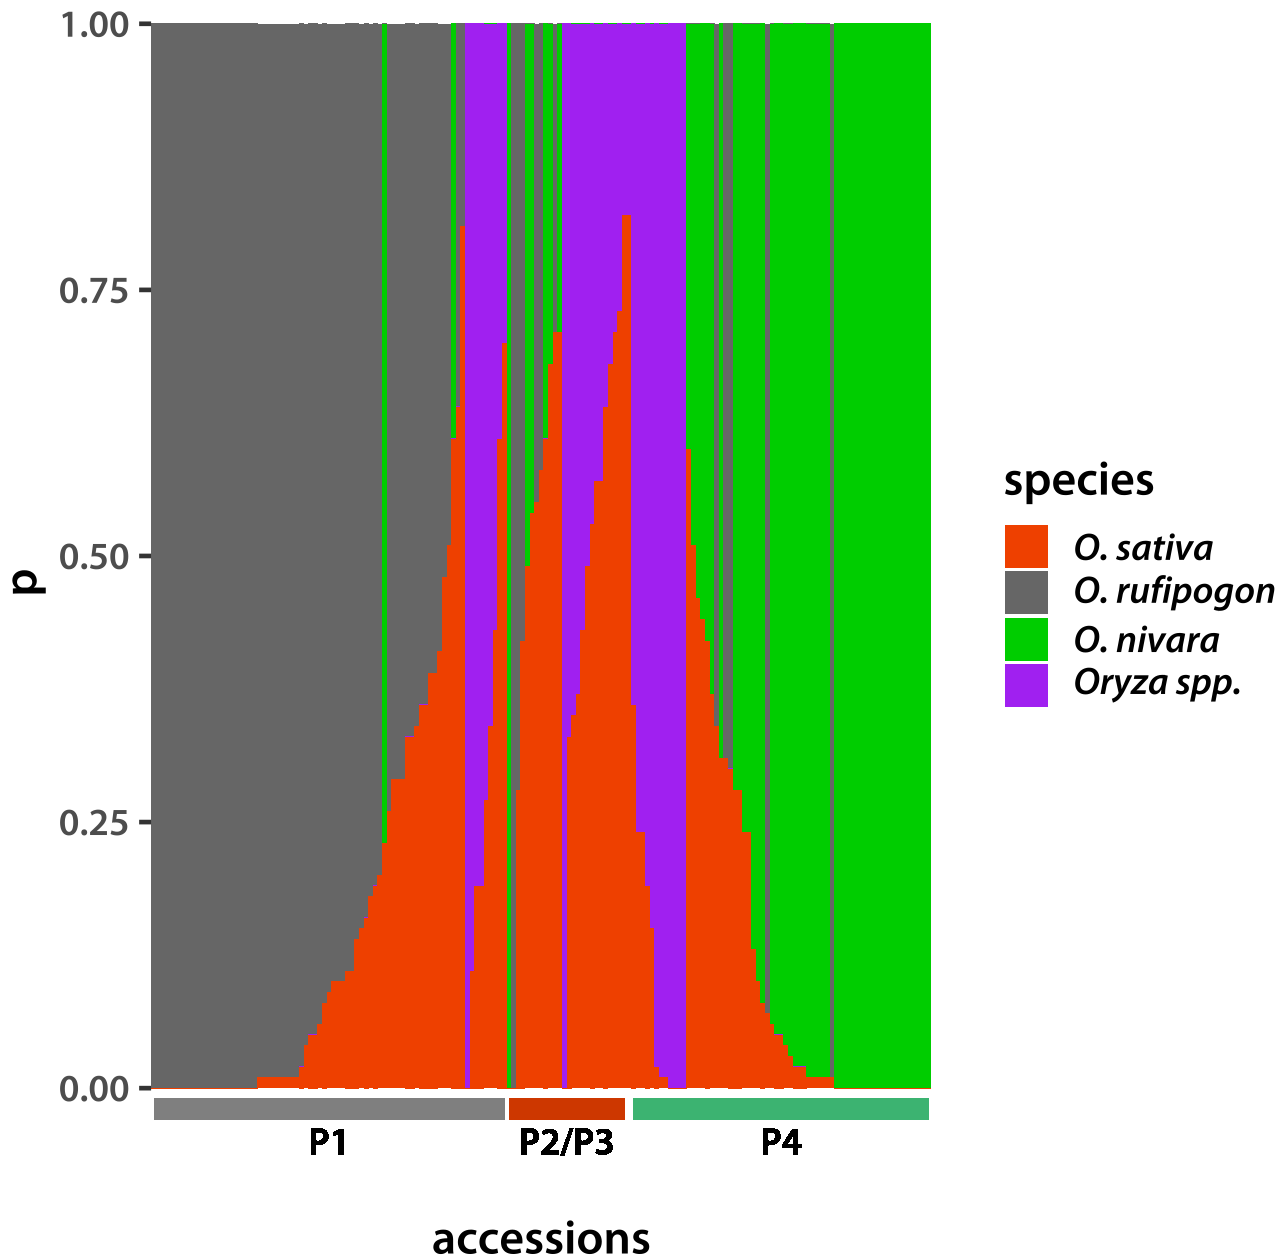

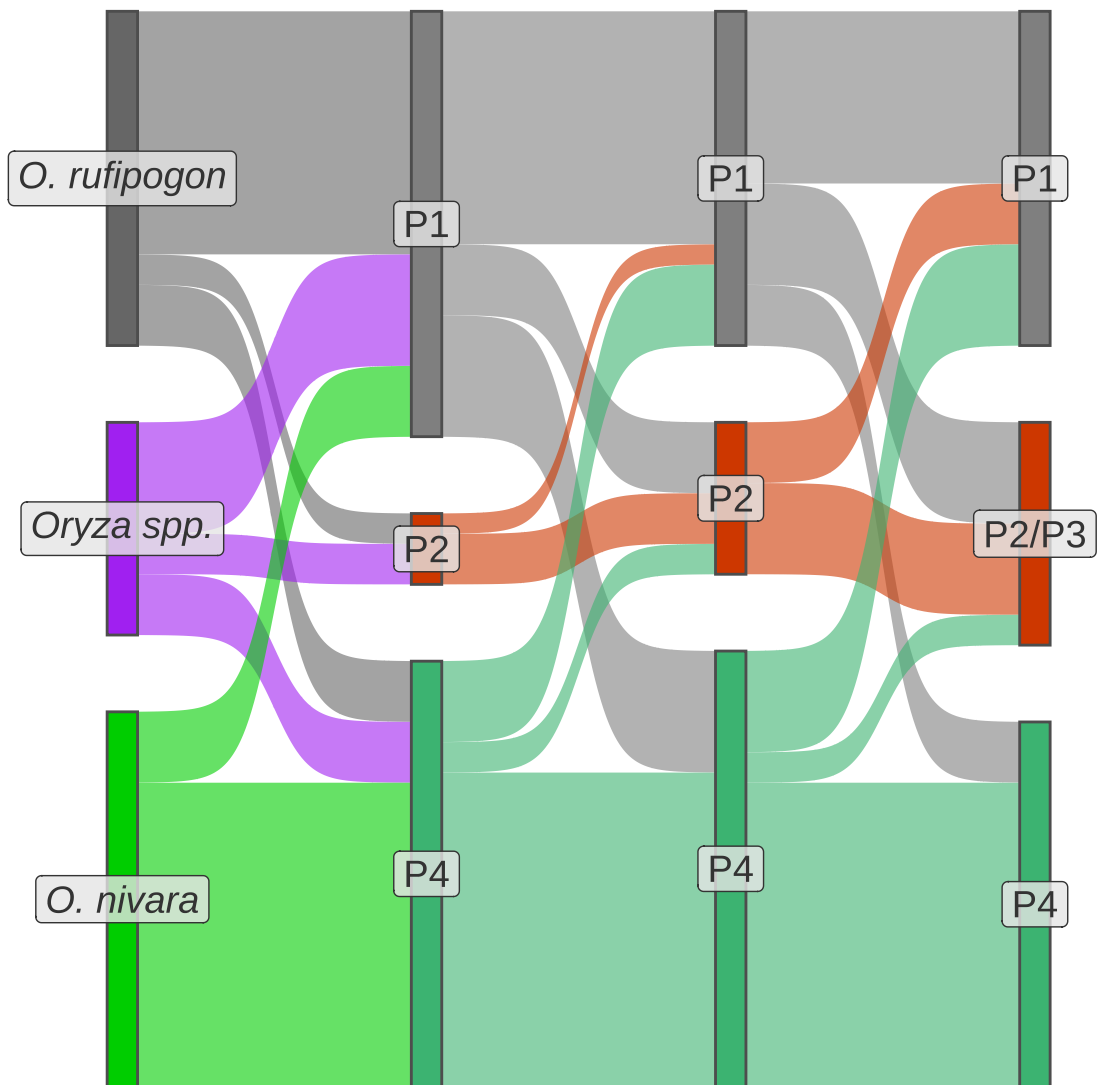

species

Dale  
Bumpers

Cornell

IRRI  
all traits

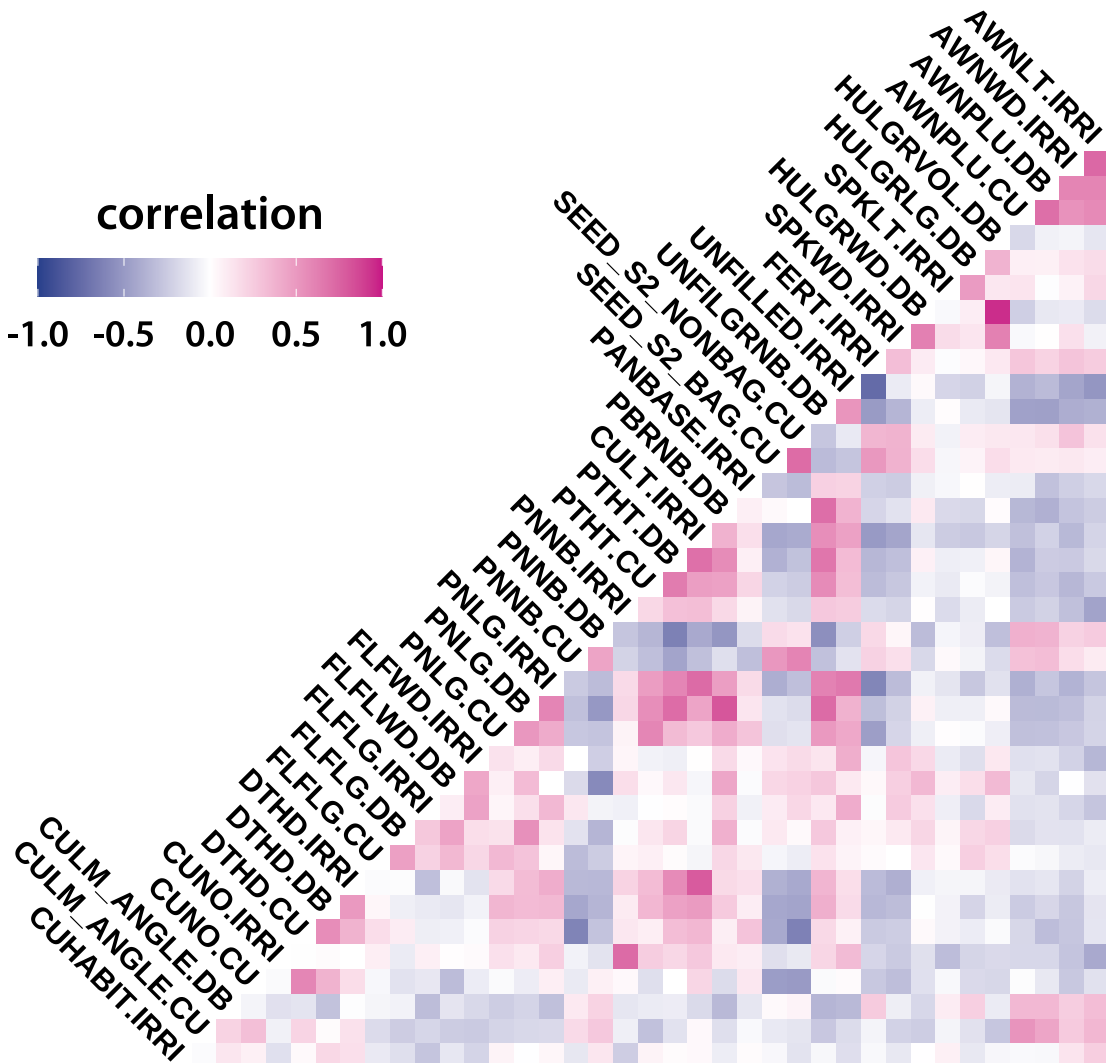

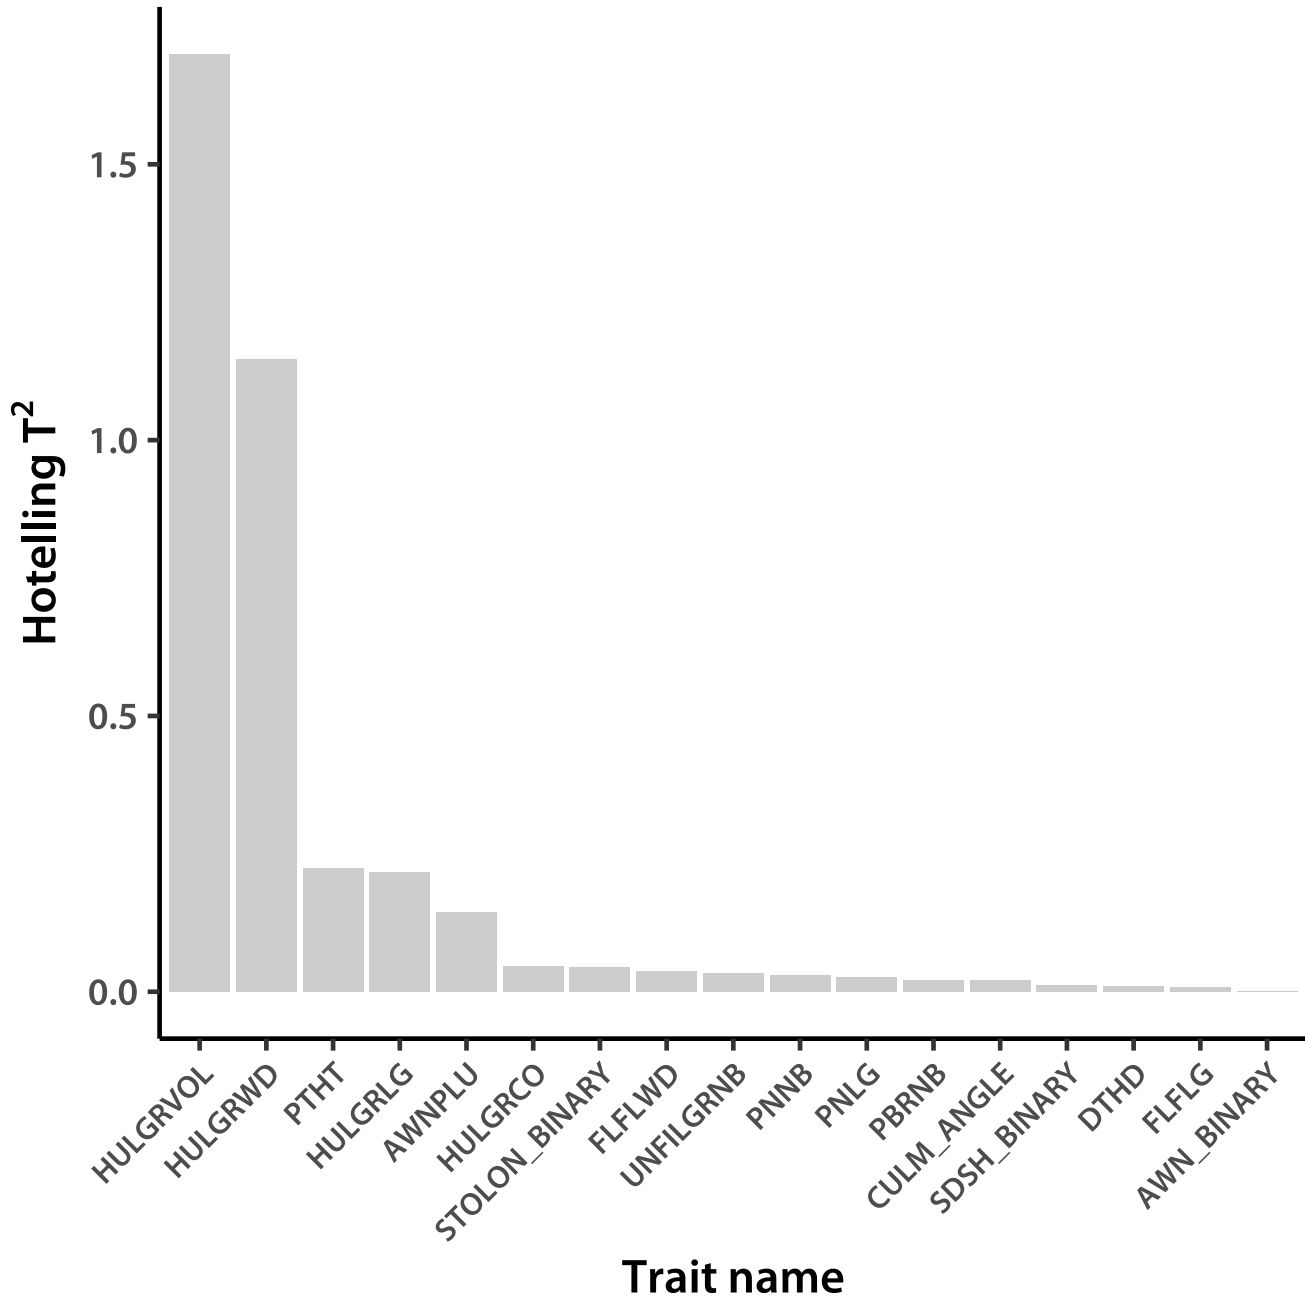

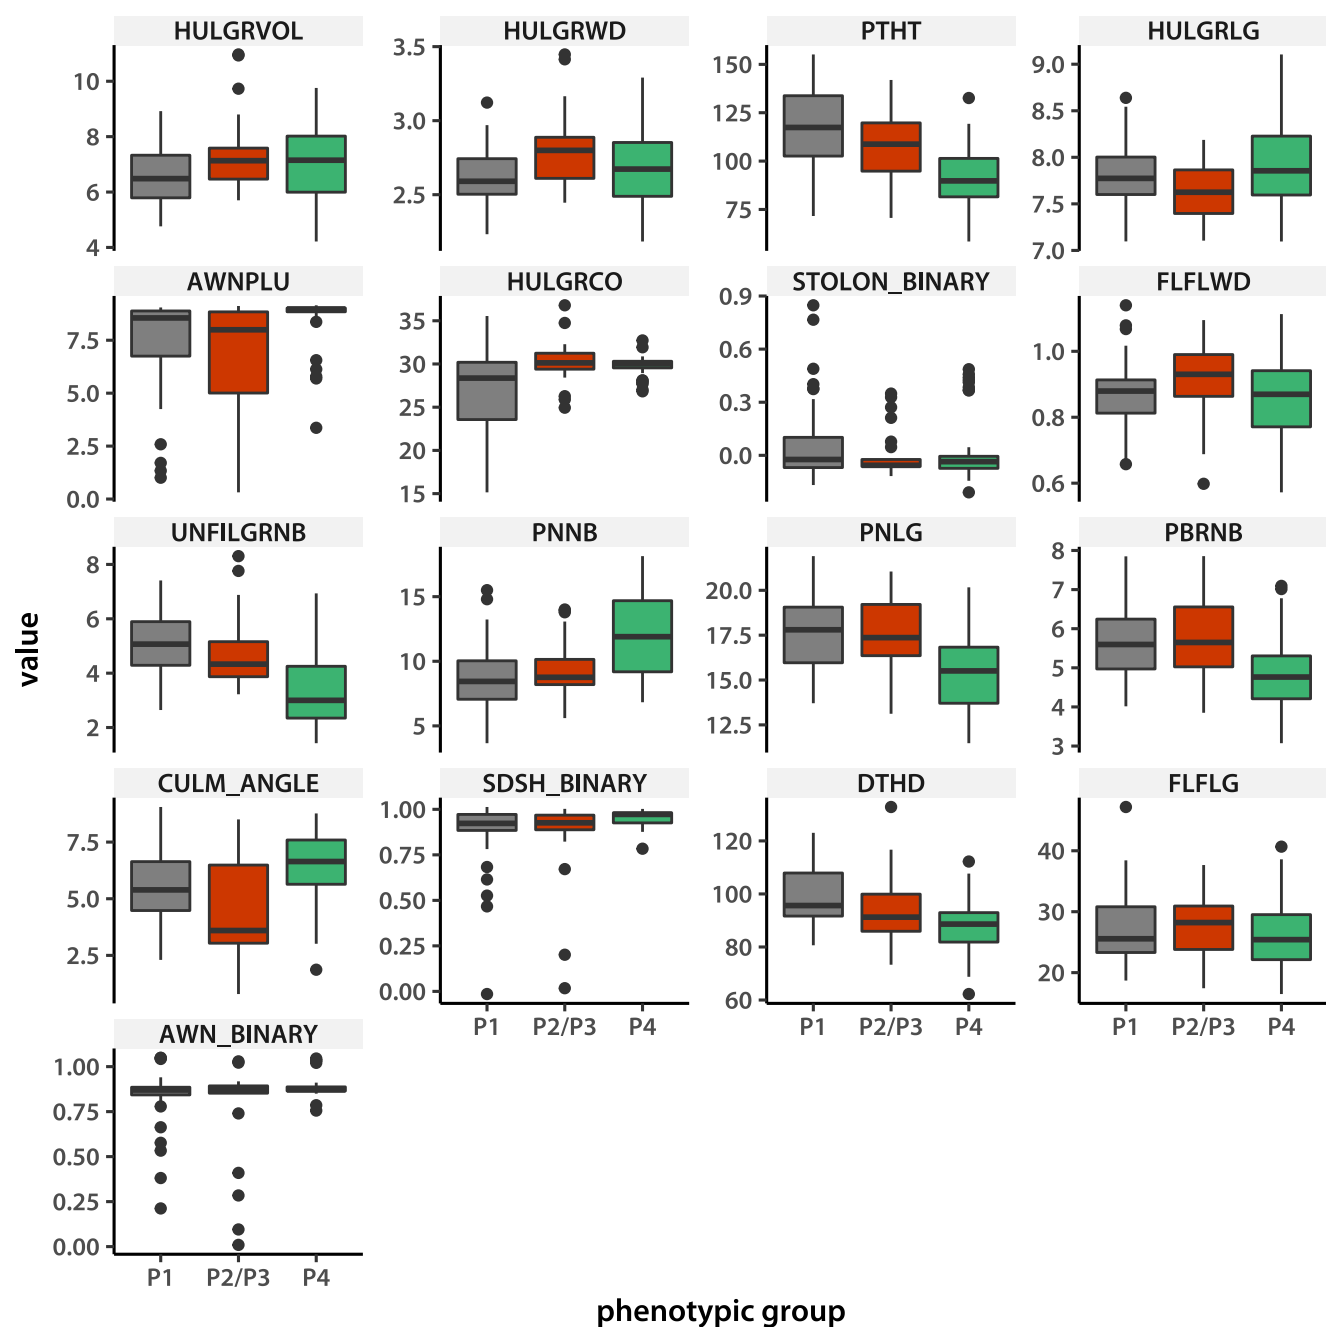

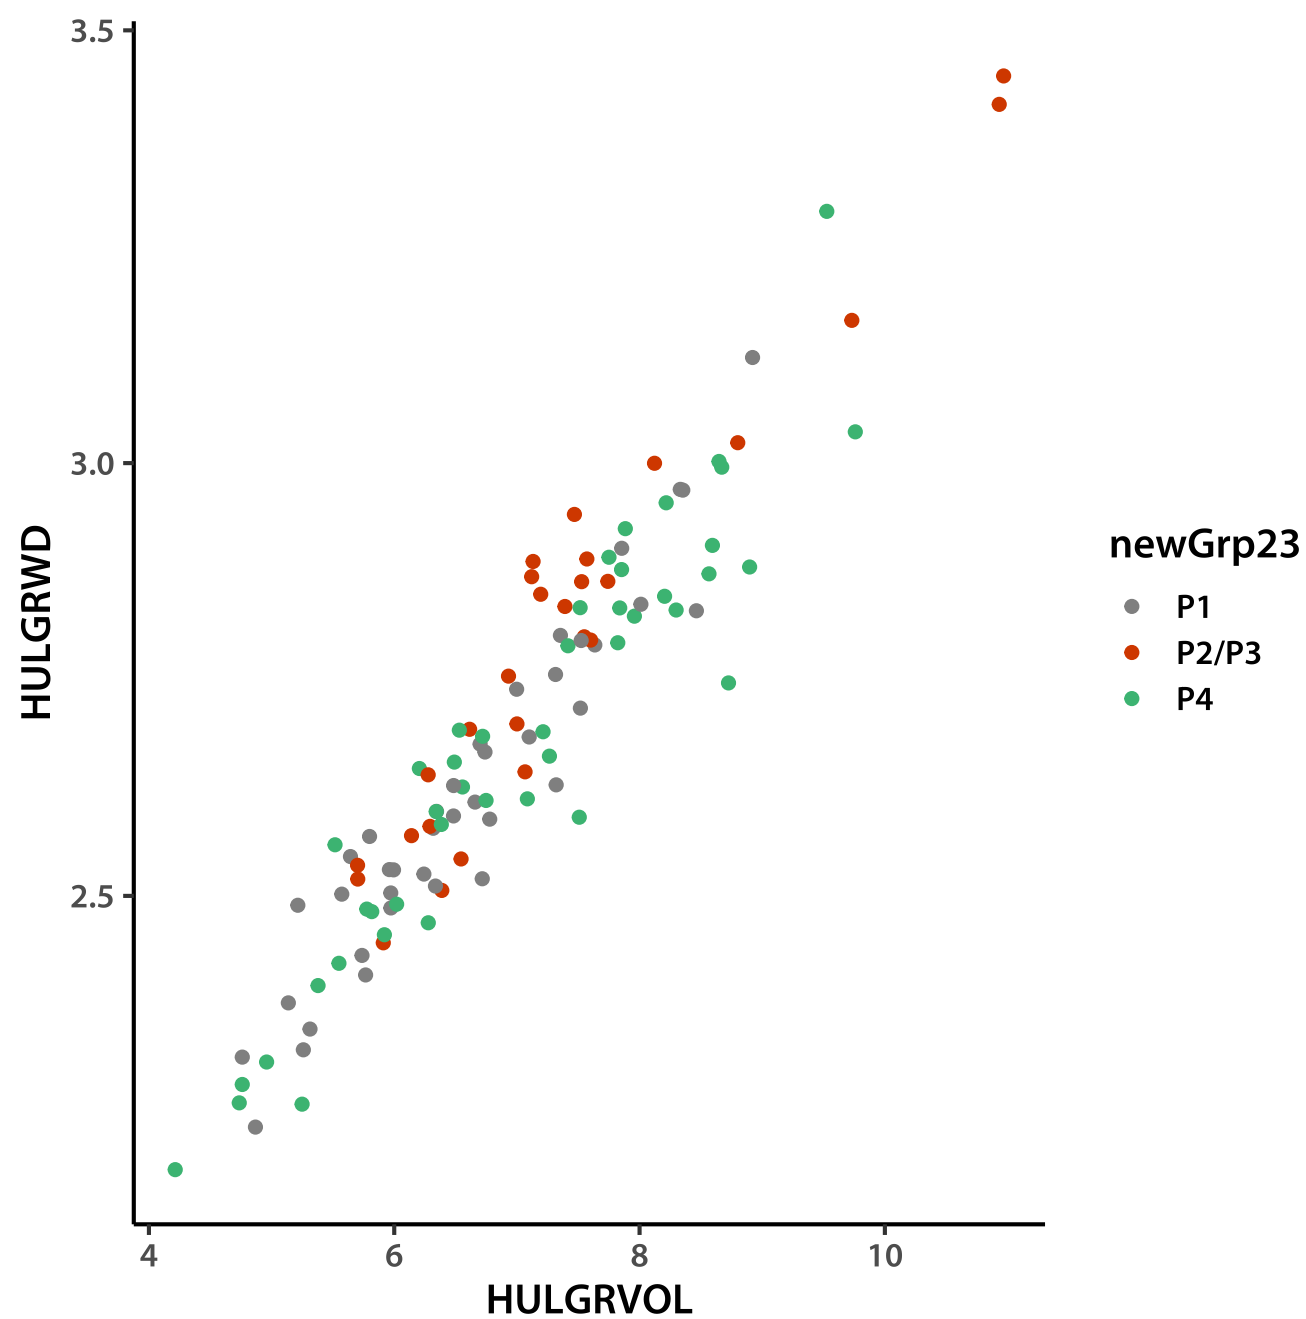



coefficient of variation

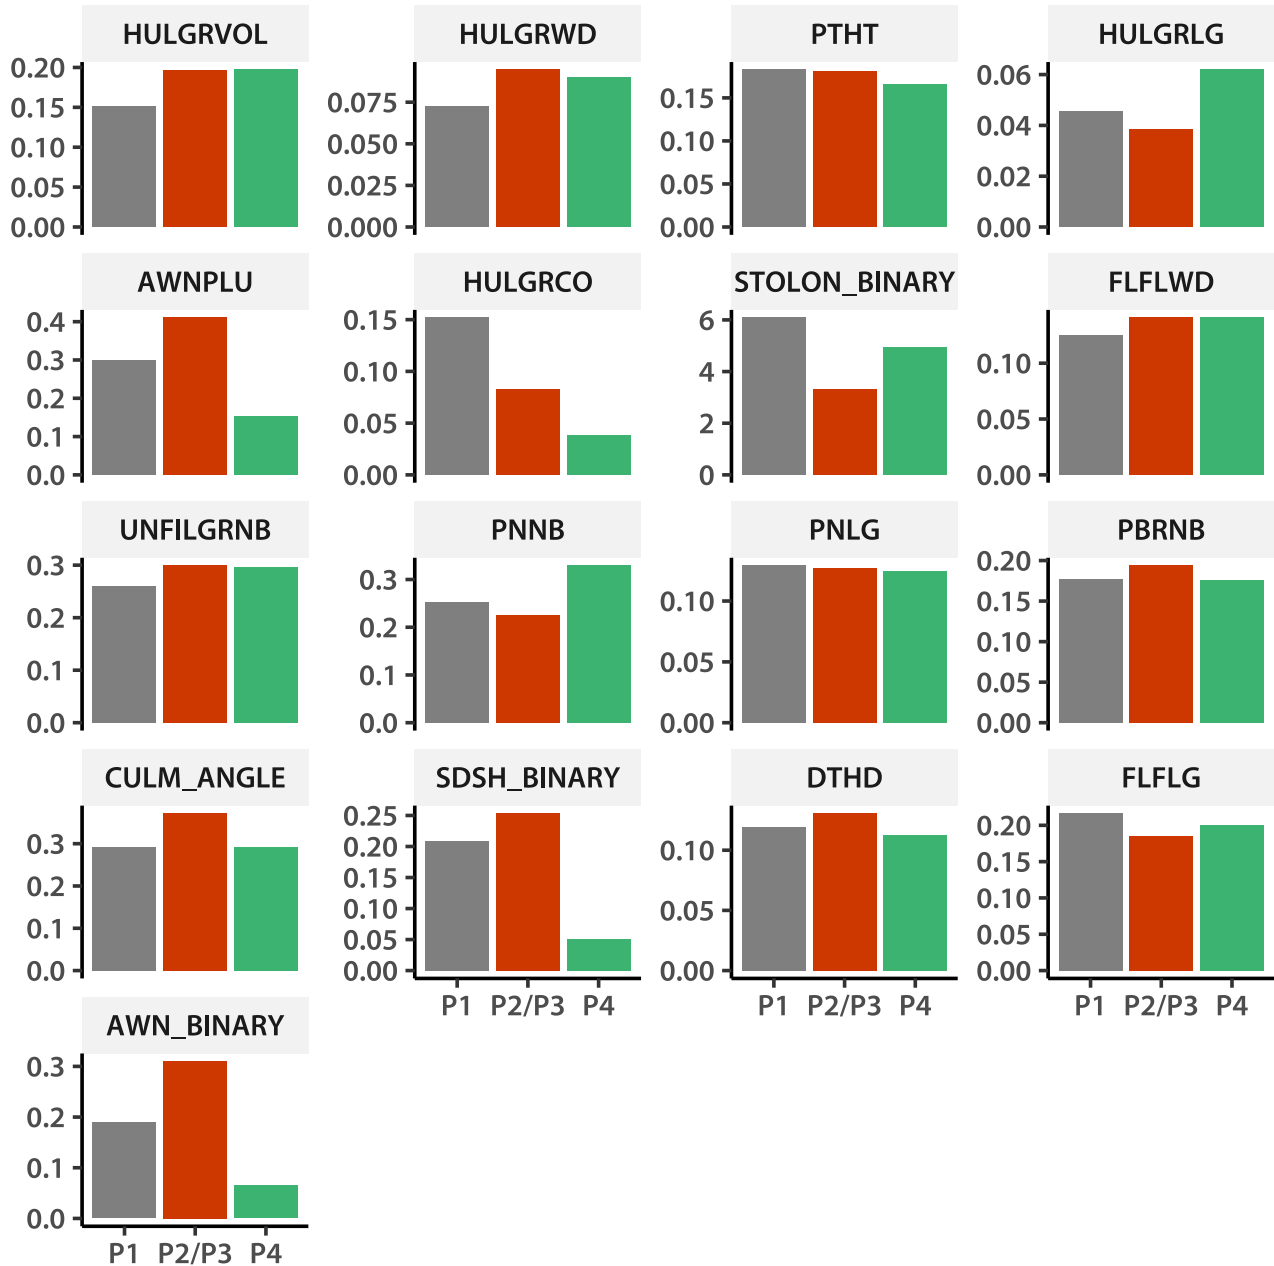

phenotypic group

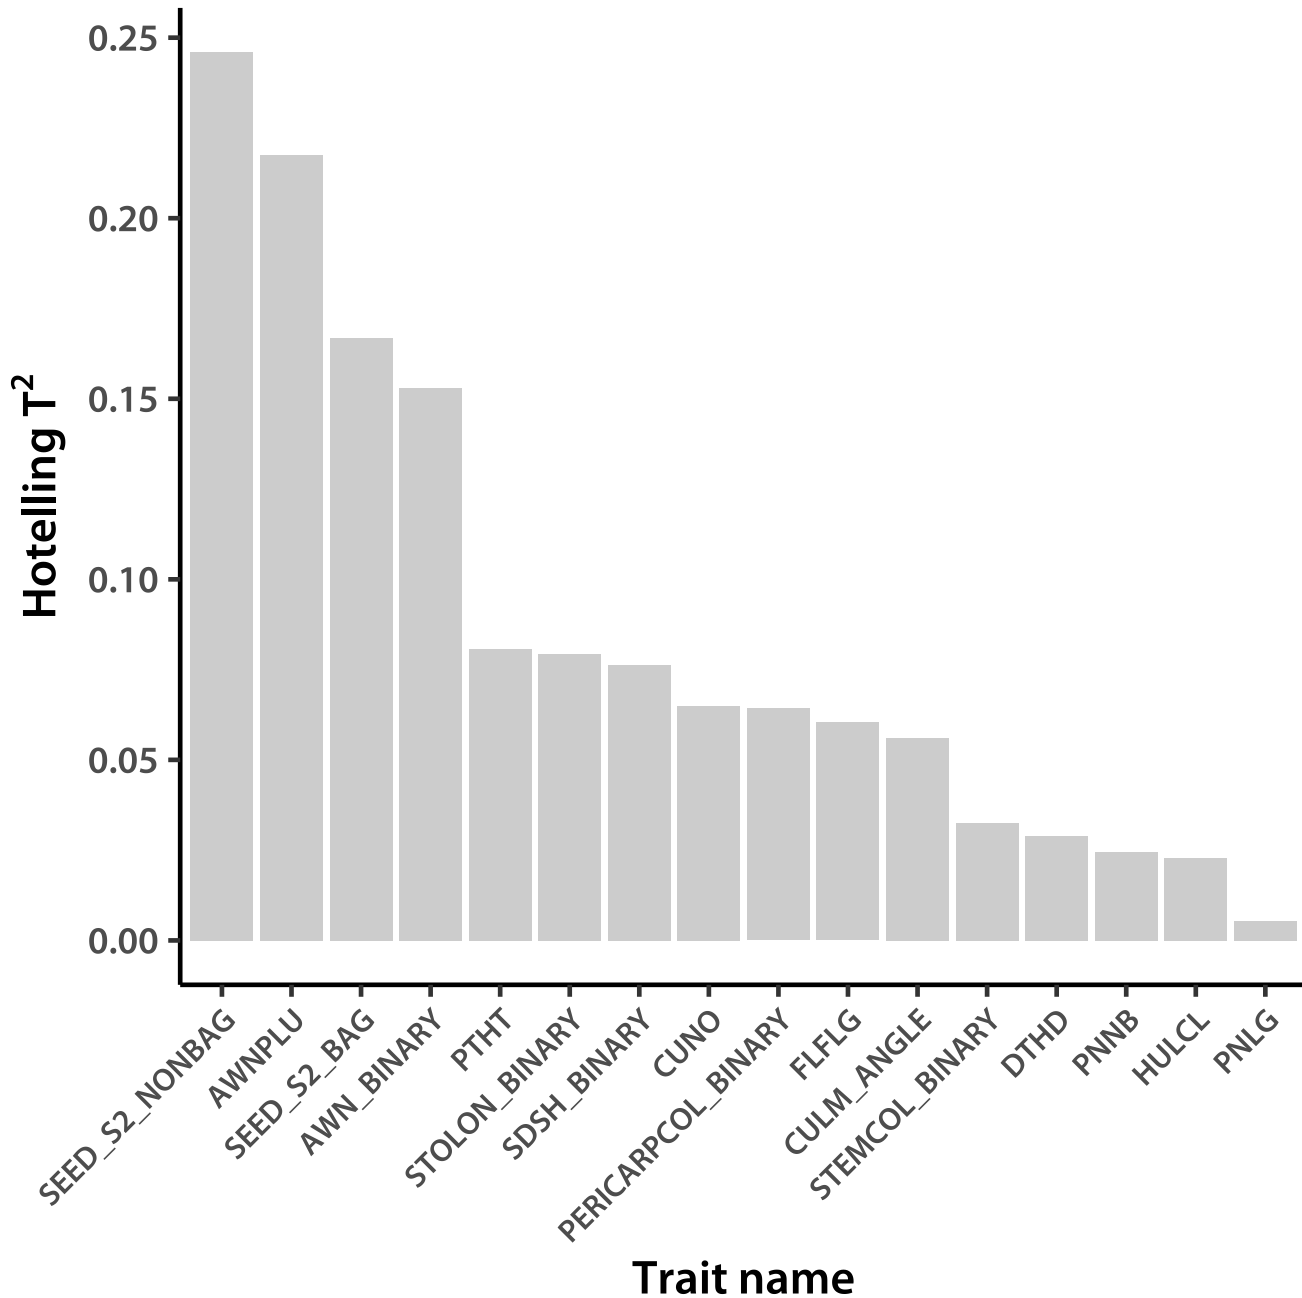

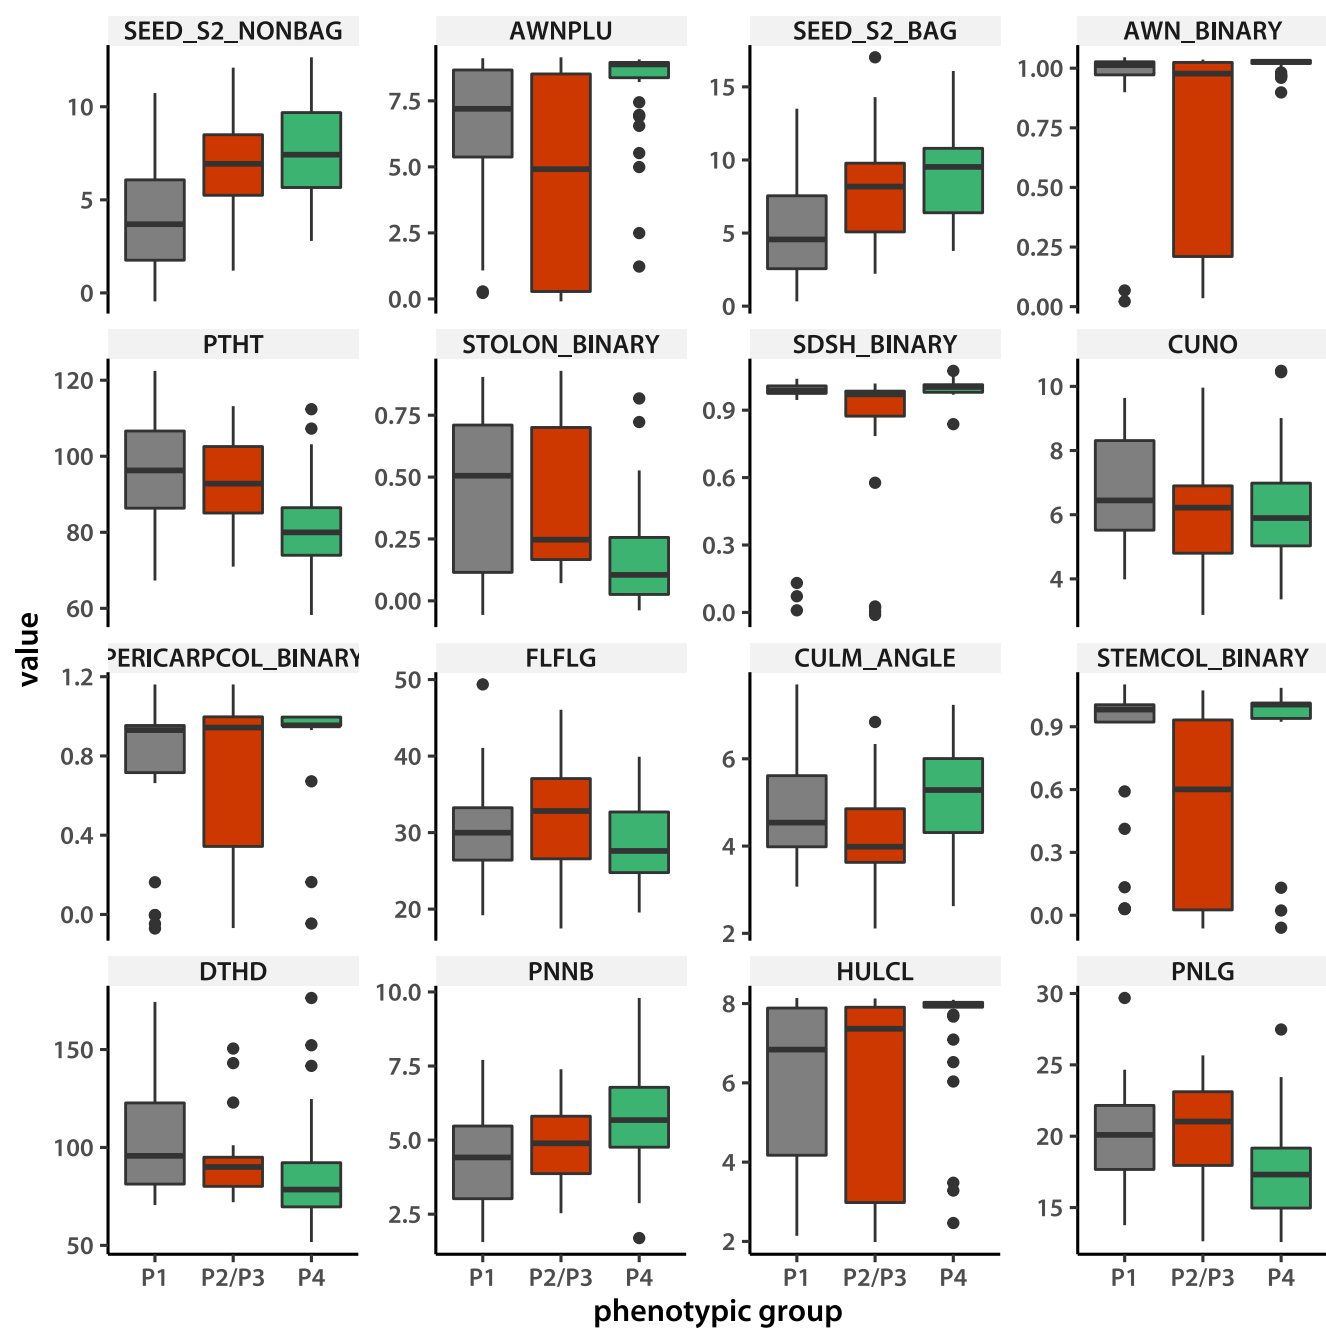

coefficient of variation

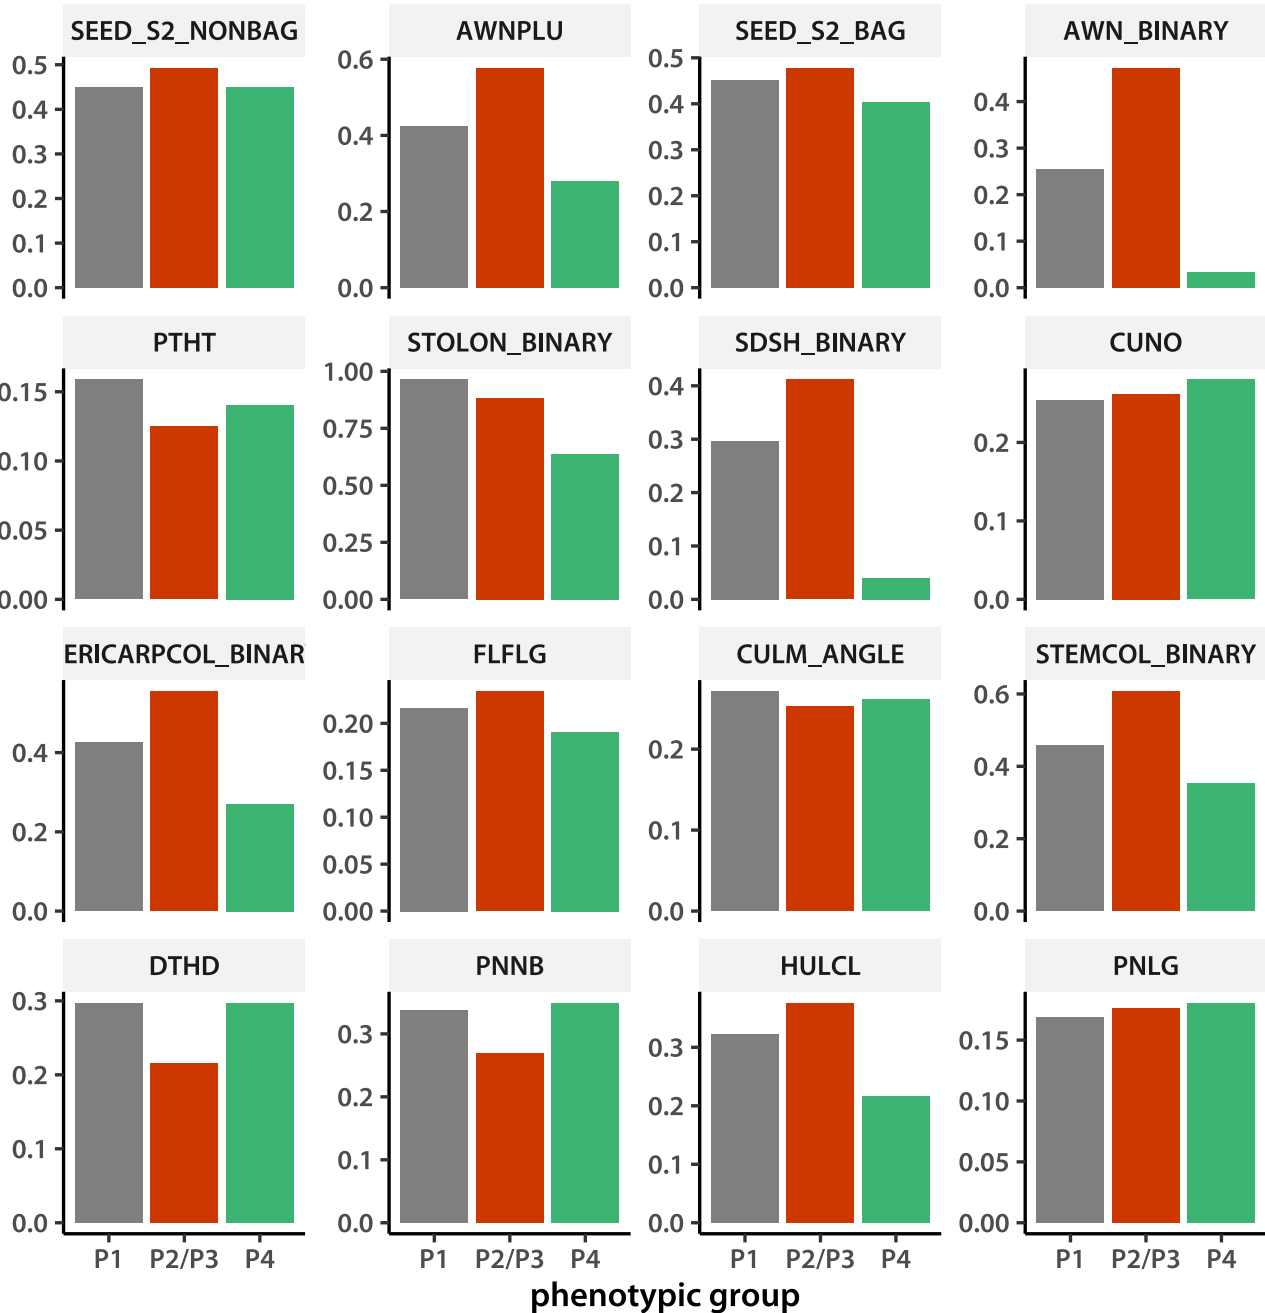

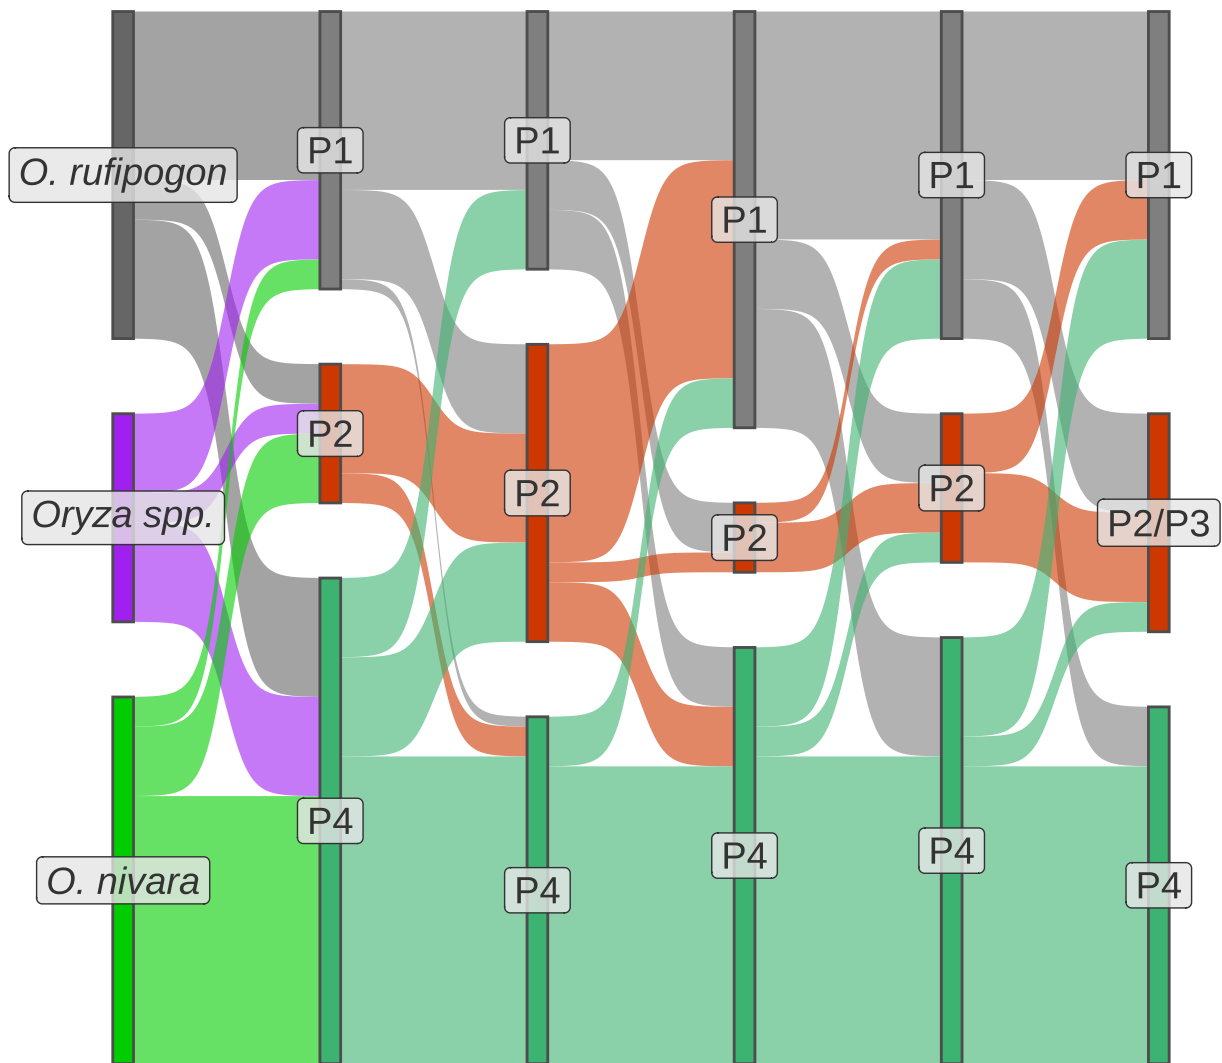

species

Cornell  
Dale Bumpers  
2x3 traits

Cornell  
Dale Bumpers  
2x4 traits

Dale  
Bumpers

Cornell

IRII  
all traits

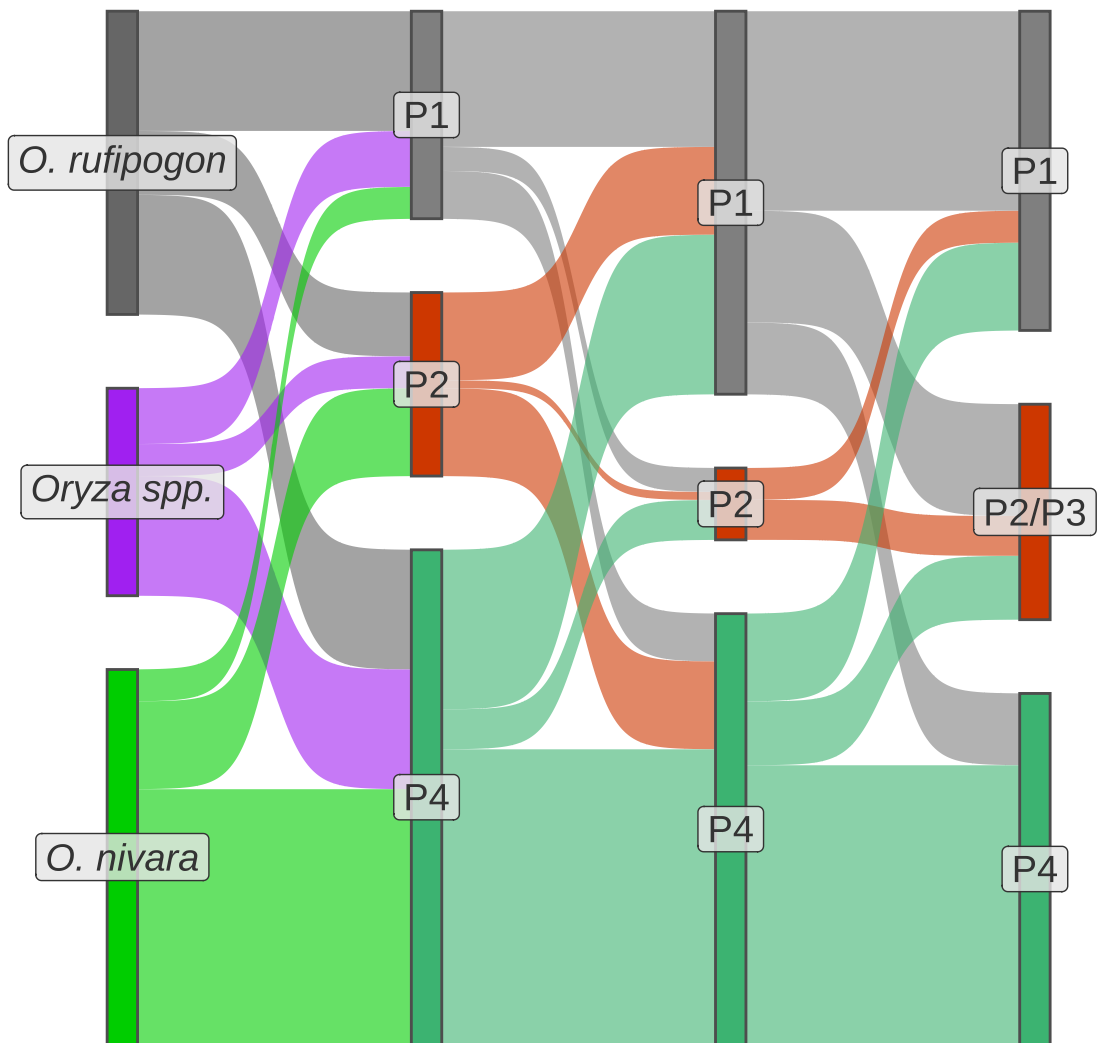

species

Dale Bumpers  
IRRI 8 (11) traits

Dale  
Bumpers  
all traits

IRRI  
all traits

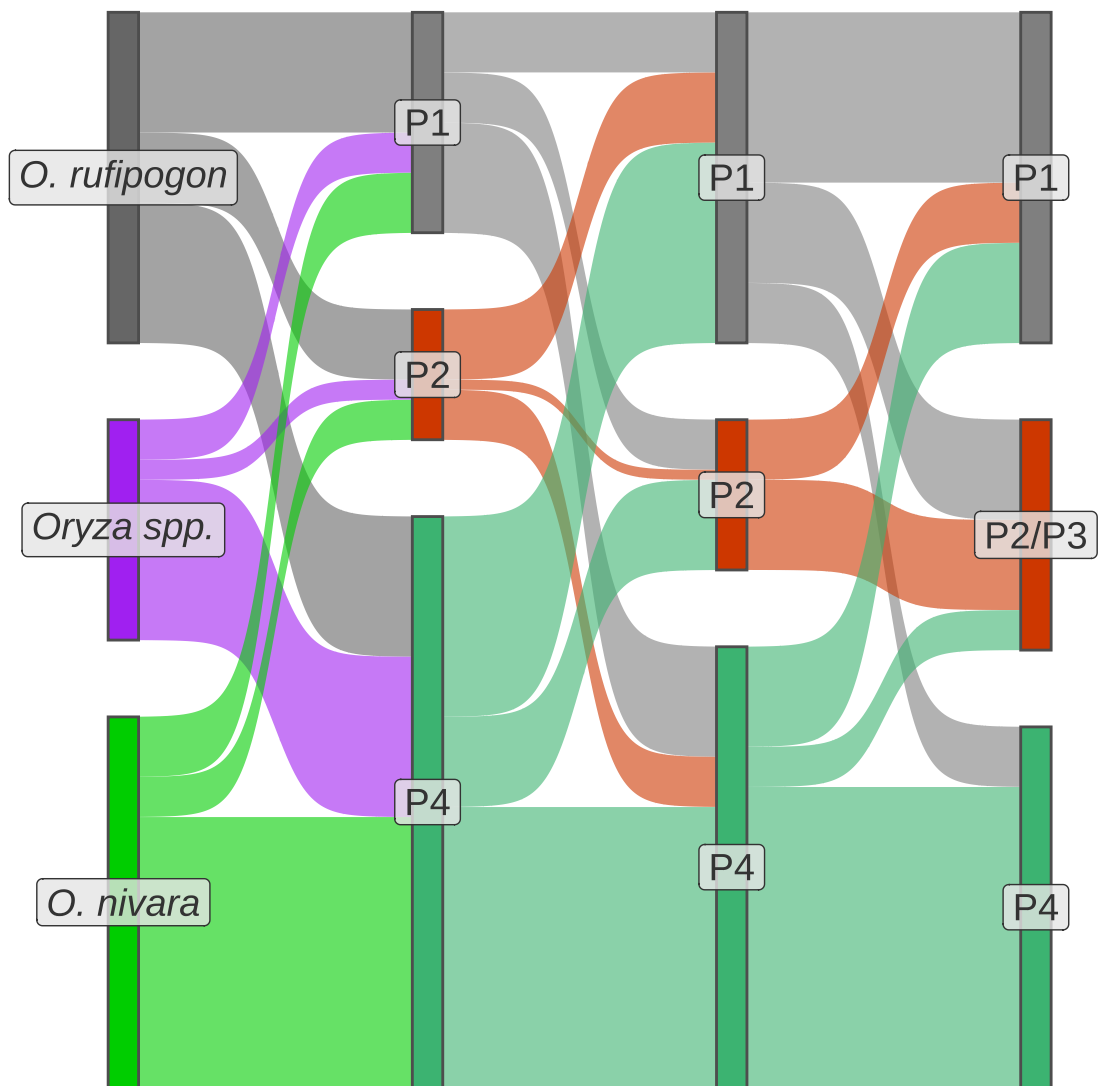

species

Cornell  
IRI 5 (11) traits

Cornell  
all traits

IRI  
all traits

p

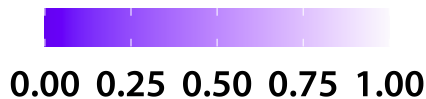

correlation

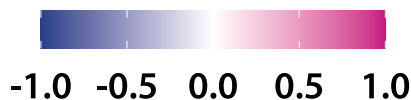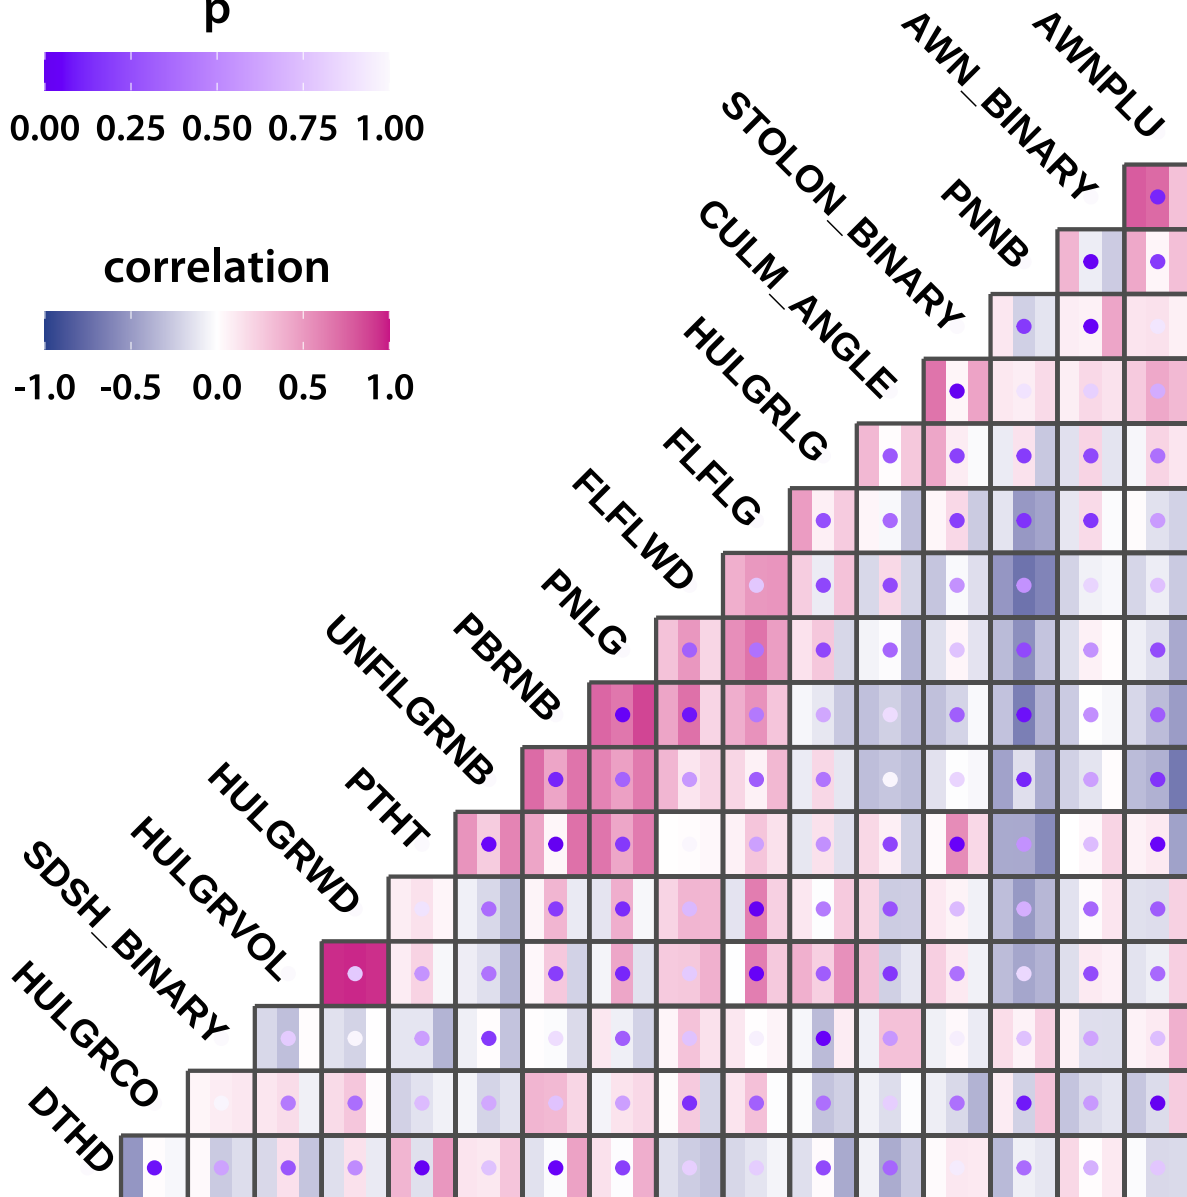



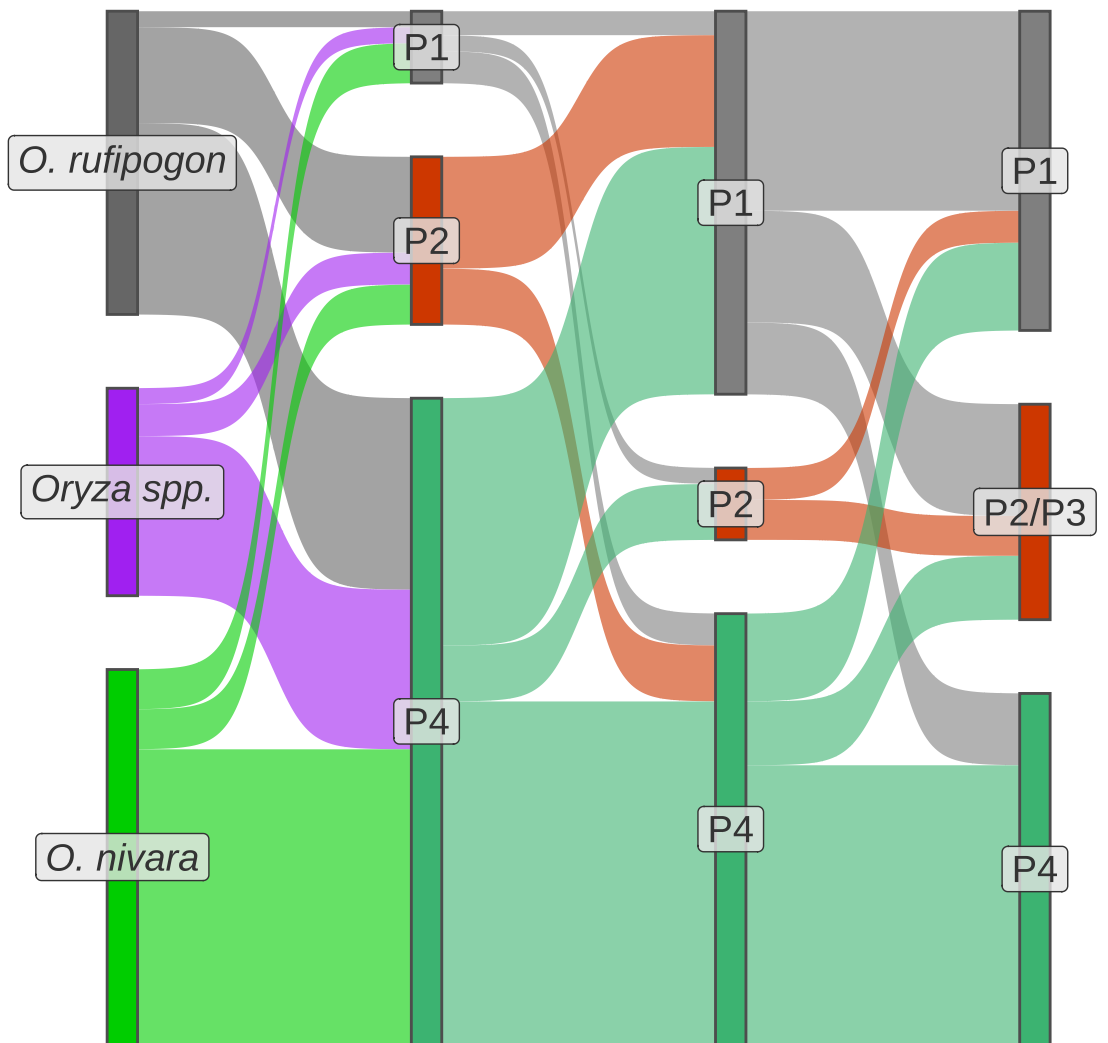

species

Dale Bumpers  
correlation (6)

Dale  
Bumpers  
all traits

IRRI  
all traits

| Age Group | Percentage |
|-----------|------------|
| 18-24     | 10%        |
| 25-34     | 20%        |
| 35-44     | 25%        |
| 45-54     | 20%        |
| 55-64     | 15%        |
| 65-74     | 10%        |
| 75-84     | 5%         |
| 85+       | 5%         |

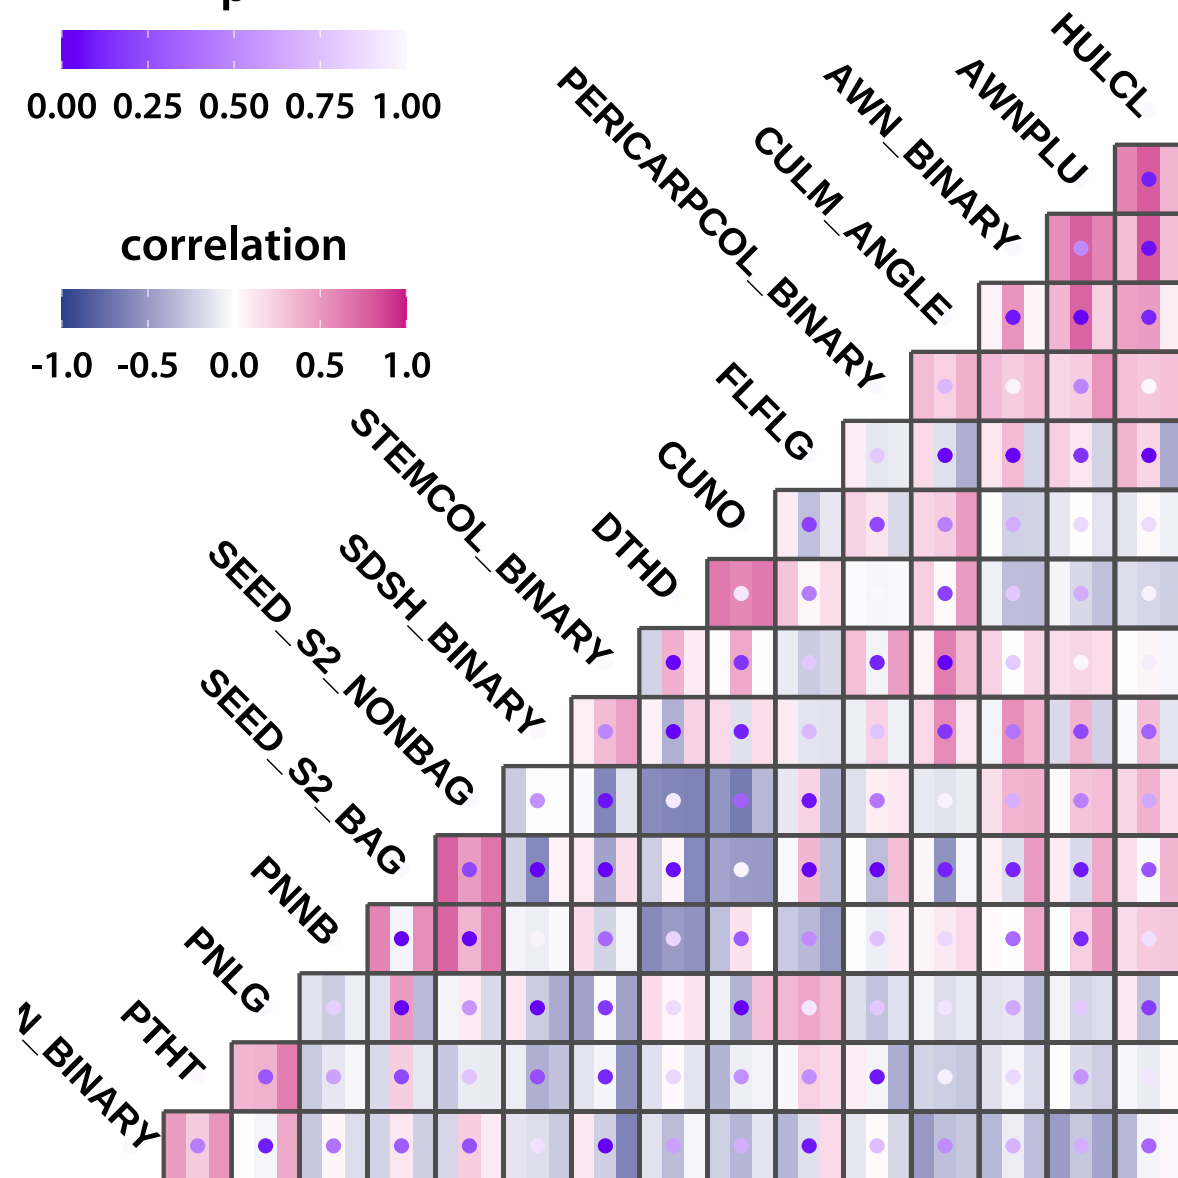

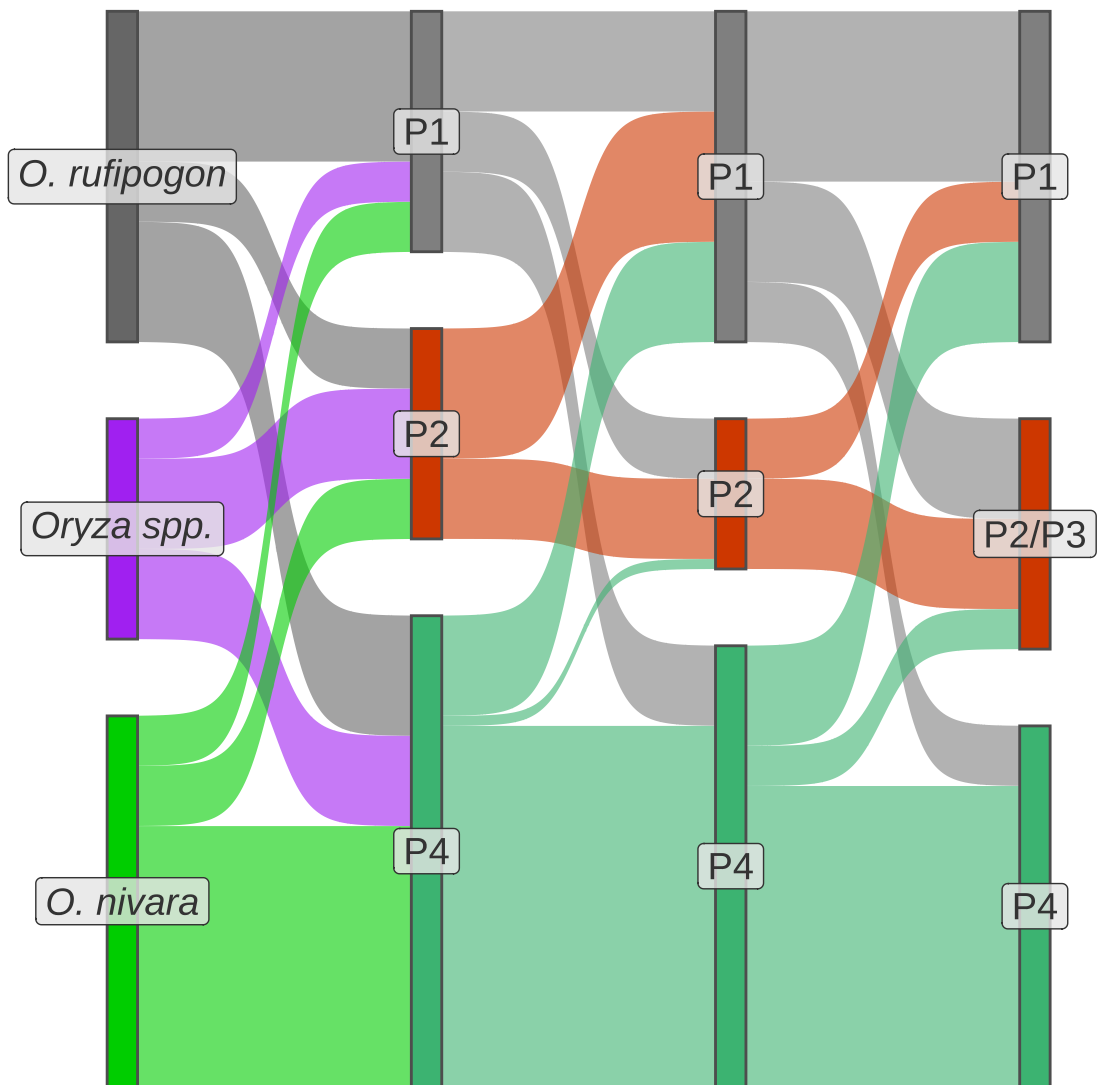

species

Cornell  
correlation (7)

Cornell  
all traits

IRRI  
all traits
