# Supplementary material for: Phenotypic Variation and the Impact of Admixture in the Oryza rufipogon Species Complex (ORSC)
Source: Frontiers journal article supplement (doi:10.3389/fpls.2022.787703), 2022-06-13
Supplement: Data_Sheet_1.ZIP [file sankeyPGrpDBCUsubset.pdf › sankeyPGrpDBCUsubset.pdf]

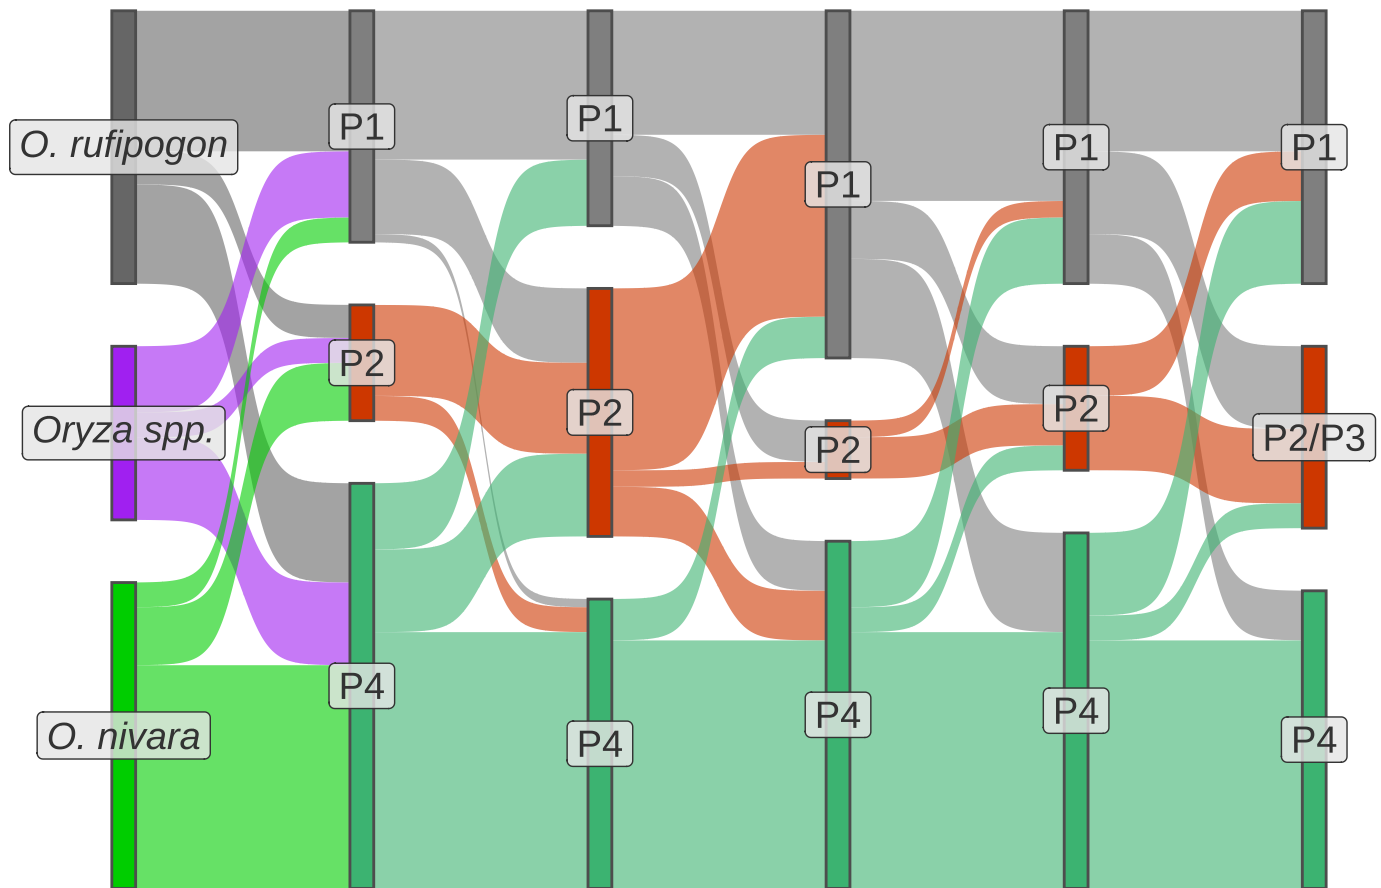

species

Cornell  
Dale Bumpers 2x3 traits

Cornell  
Dale Bumpers 2x4 traits

Dale  
Bumpers

Cornell

IRRI  
all traits
