# Supplementary material for: Phenotypic Variation and the Impact of Admixture in the Oryza rufipogon Species Complex (ORSC)
Source: Front Plant Sci. 2022 Jun 13;13:787703. doi: 10.3389/fpls.2022.787703 (PMC9235872; doi:10.3389/fpls.2022.787703)
Supplement: Supplementary file 2 [file Table_2.xlsx]

## Sheet: TableS2
Supplementary Table 2: List of ORSC accessions used in this study. The list includes the accession number, species designation, originating country, collection site location, subpopulation group based on Kim et al. (2016) and Huang et al. (2012), phenotyping location [International Rice Research Institute (IRRI) Los Baños, Laguna, Philippines; Dale Bumpers National Rice Research Center (DB), Stut…
NSFTV_ID 1	IRGC_ID 2	IRRI_GRIN_Global_taxonomy 3	Core O. nivara & O. rufipogon 4	IRGC_taxonomy_Kim_et_al_2016 5	Originating country	Region	Latitude	Longitude	Kim_et_al_2016_ORSC_subpopulation 5	Huang_et_al_2012_subpopulation 6	IRRI_phenotype	DB_phenotype	CU_phenotype	IRRI_phenotypic_groups	IRRI_phenotypic_groups_Pvalues	Corrected_species 7	Chloroplast_haplotype 5	Growth habit prediction based on Or_SINE code 8	O_sativa_genome_fraction 9	aromatic_genome_fraction	aus_genome_fraction	indica_genome_fraction	TEJ_genome_fraction	TRJ_genome_fraction	W1_genome_fraction	W2_genome_fraction	W3_genome_fraction	W4_genome_fraction	W5_genome_fraction	W6_genome_fraction
NID401	IRGC80433	O. rufipogon	NA	O. rufipogon	India	South Asia	18°54'51"N	81°51'56"E	Admix of W4/ W1	NA	IRRI	DB	CU	P4	0.95	O. rufipogon	I	perennial	0.31	0.0184825	0.122313	0.168866	0	0	0.383546	0.000644	0	0.238389	0.0035175	0.0642425
NID402	IRGC80539	Oryza hybr.	NA	O. spontanea	India	South Asia	19°8'"N	81°56'"E	W4	NA	IRRI	DB	CU	P2/P3	0.95	Oryza hybr.	I	NA	0.64	0.0215267	0.549932	0.0637533	0.00124167	0.0041975	0.00114417	0	0.0139675	0.342932	0.0013075	0
NID403	IRGC80562	O. rufipogon	NA	O. rufipogon	India	South Asia	19°45'"N	81°19'"E	Admix of W1/ W6	NA	IRRI	NA	NA	P1	1	O. rufipogon	VIII	intermediate	0.51	0	0.160573	0.333475	0.000386	0.0186983	0.379978	0.017165	0	0.0227267	0	0.0669958
NID404	IRGC80582	O. nivara	NA	O. nivara	India	South Asia	20°20'"N	81°0'"E	W4	NA	IRRI	DB	NA	P2/P3	0.65	O. nivara	VIII	perennial	0.56	0.013205	0.223322	0.322378	0	0	0.0095375	0.00137917	0	0.405555	0.0119217	0.0127025
NID405	IRGC80586	Oryza hybr.	NA	O. spontanea	India	South Asia	20°20'"N	80°55'"E	W4	NA	IRRI	DB	NA	P4	1	Oryza hybr.	III	annual	0.19	0	0.193838	0	0	0	0	0.00497333	0	0.776685	0.0200592	0.00444417
NID406	IRGC80592	O. rufipogon	NA	O. rufipogon	India	South Asia	20°20'"N	81°5'"E	Admix of W1/ W6	NA	IRRI	NA	NA	P1	0.95	O. rufipogon	VIII	perennial	0.1	0.00570833	0.0519725	0.0416775	0	0.000908	0.666341	0.035235	0	0.0239917	0.0101783	0.163988
NID407	IRGC80742	Oryza hybr.	NA	O. rufipogon	Myanmar	Southeast Asia	19°40'"N	96°16'"E	W1	NA	IRRI	DB	CU	P1	0.55	Oryza hybr.	I	perennial	NA	NA	NA	NA	NA	NA	NA	NA	NA	NA	NA	NA
NID408	IRGC80745	Oryza hybr.	NA	O. spontanea	Myanmar	Southeast Asia	19°8'"N	96°20'"E	W1	NA	IRRI	DB	NA	P1	0.9	Oryza hybr.	VII	perennial	0.61	0	0	0.609055	0	0.00338583	0.357609	0	0	0	0.0123817	0.0175683
NID410	IRGC80759	O. nivara	NA	O. nivara	Myanmar	Southeast Asia	17°32'"N	96°34'"E	Admix of W1/ W5	NA	NA	DB	CU	NA	NA	O. nivara	I	intermediate	0	0	0	0.00494	0	0	0.94771	0	0	0	0.00914	0.0382092
NID411	IRGC81801	O. rufipogon	O. rufipogon	O. rufipogon	Indonesia	Southeast Asia	0°1'"N	112°0'"E	W1	NA	IRRI	NA	NA	P1	1	O. rufipogon	I	perennial	NA	NA	NA	NA	NA	NA	NA	NA	NA	NA	NA	NA
NID412	IRGC81802	O. rufipogon	O. rufipogon	O. rufipogon	Indonesia	Southeast Asia	1°20'"N	112°20'"E	W1	NA	IRRI	NA	NA	P1	1	O. rufipogon	I	perennial	0	0	0	0.00250917	0	0	0.997491	0	0	0	0	0
NID413	IRGC81850	O. nivara	O. nivara	O. nivara	India	South Asia	27°0'"N	83°15'"E	W5	NA	IRRI	DB	CU	P4	1	O. nivara	VI	intermediate	0.02	0	0.0180958	0	0	0	0	0	0	0	0.981904	0
NID414	IRGC81903	Oryza hybr.	NA	O. spontanea	India	South Asia	25°10'"N	84°10'"E	W4	NA	IRRI	DB	NA	P2/P3	0.95	Oryza hybr.	I	annual	0.82	0.0313133	0.721812	0.0674642	0.00141167	0	0	0	0	0.169505	0.00261417	0.0058825
NID415	IRGC81909	Oryza hybr.	NA	O. spontanea	India	South Asia	27°5'"N	83°12'"E	W5	NA	IRRI	DB	CU	P4	0.95	Oryza hybr.	VI	intermediate	NA	NA	NA	NA	NA	NA	NA	NA	NA	NA	NA	NA
NID416	IRGC81970	Oryza spp.	NA	O. spontanea	Thailand	Southeast Asia	14°'"N	101°30'"E	W1	NA	IRRI	DB	CU	P2/P3	0.9	Oryza spp.	I	perennial	0.68	0	0	0.683713	0	0	0.309775	0	0	0	0	0.00651167
NID417	IRGC81976	O. rufipogon	NA	O. rufipogon	Indonesia	Southeast Asia	6°30'"S	106°45'"E	W1	NA	IRRI	NA	NA	P1	0.7	O. rufipogon	VII	perennial	NA	NA	NA	NA	NA	NA	NA	NA	NA	NA	NA	NA
NID418	IRGC81977	O. rufipogon	NA	O. rufipogon	Indonesia	Southeast Asia	6°10'"S	106°44'"E	W1	NA	IRRI	NA	NA	P1	0.55	O. rufipogon	VIII	perennial	0.01	0	0	0.00369583	0	0.00383083	0.992473	0	0	0	0	0
NID420	IRGC81984	O. rufipogon	NA	O. rufipogon	Laos	Southeast Asia	18°0'"N	102°40'"E	W1	NA	IRRI	DB	CU	P1	1	O. rufipogon	VIII	intermediate	0.33	0	0.0152625	0.300804	0	0.009115	0.622773	0	0	0.03592	0	0.0161242
NID421	IRGC81990	O. rufipogon	O. rufipogon	O. rufipogon	Myanmar	Southeast Asia	17°0'"N	96°7'"E	W1	NA	IRRI	NA	NA	P1	1	O. rufipogon	VIII	perennial	0.01	0	0	0	0	0.00551083	0.994489	0	0	0	0	0
NID422	IRGC81993	O. rufipogon	O. rufipogon	O. rufipogon	Vietnam	Southeast Asia	9°47'15"N	105°43'40"E	W1	NA	IRRI	NA	NA	P1	0.95	O. rufipogon	V	perennial	0.1	0.00124167	0	0.09468	0	0.00754417	0.884791	0	0	0	0	0.0117433
NID424	IRGC81996	O. rufipogon	O. rufipogon	O. rufipogon	Papua New Guinea	Australasia	8°6'"S	142°55'"E	W3	NA	IRRI	NA	NA	P1	1	O. rufipogon	IV	perennial	0	0	0	0.000739	0	0	0.0220825	0	0.977178	0	0	0
NID425	IRGC82040	O. rufipogon	O. rufipogon	O. rufipogon	Thailand	Southeast Asia	6°50'"N	101°'"E	W1	NA	IRRI	NA	NA	P1	1	O. rufipogon	VII	perennial	NA	NA	NA	NA	NA	NA	NA	NA	NA	NA	NA	NA
NID426	IRGC82979	O. rufipogon	NA	O. rufipogon	Thailand	Southeast Asia	17°10'"N	103°45'"E	W1	NA	IRRI	NA	NA	P4	0.85	O. rufipogon	VIII	perennial	0.07	0	0	0.0703475	0	0	0.929652	0	0	0	0	0
NID427	IRGC82988	O. rufipogon	NA	O. rufipogon	China	East Asia	NA	NA	Admix of W1/ W6	NA	IRRI	DB	CU	P1	0.95	O. rufipogon	I	perennial	0.29	0.001585	0	0.246913	0.0335367	0.0034025	0.346439	0	0.000669	0	0	0.367453
NID428	IRGC82989	Oryza hybr.	NA	O. rufipogon	China	East Asia	NA	NA	Admix of W4/ W1	NA	IRRI	DB	CU	P1	0.7	Oryza hybr.	III	perennial	0.39	0	0.12076	0.271599	0	0	0.06198	0.183624	0	0.289131	0.00360417	0.0693025
NID429	IRGC82990	O. rufipogon	NA	O. rufipogon	China	East Asia	NA	NA	Admix of W1/ W6	NA	IRRI	DB	CU	P1	1	O. rufipogon	VIII	perennial	0.15	0.0103308	0	0.134658	0.009215	0	0.518203	0	0	0	0	0.327593
NID430	IRGC82991	O. rufipogon	NA	O. rufipogon	China	East Asia	NA	NA	W6	NA	IRRI	DB	CU	P4	0.949	O. rufipogon	I	perennial	0.3	0.00569083	0.00655417	0.268512	0.0064275	0.0109583	0.049915	0	0	0	0	0.651944
NID431	IRGC82992	O. rufipogon	NA	O. rufipogon	China	East Asia	NA	NA	Admix of W6/ W2	NA	IRRI	DB	CU	P1	0.448	O. rufipogon	I	perennial	0.18	0.0029725	0	0.176712	0.00451333	0	0.0465633	0.485162	0	0	0	0.284078
NID432	IRGC83794	O. rufipogon	O. rufipogon	O. rufipogon	Thailand	Southeast Asia	15°20'"N	103°45'"E	W1	NA	IRRI	DB	CU	P1	1	O. rufipogon	III	perennial	0.16	0.00134417	0.00362917	0.152052	0	0	0.836946	0	0	0.00472417	0	0.0013075
NID433	IRGC83795	O. rufipogon	NA	O. rufipogon	India	South Asia	24°0'"N	87°50'"E	W1	NA	IRRI	DB	CU	P1	0.95	O. rufipogon	VII	perennial	0.64	0.00475417	0.0287417	0.602272	0.00361667	0.00231833	0.347042	0	0	0.00535	0	0.005905
NID434	IRGC83823	O. rufipogon	O. rufipogon	O. rufipogon	Vietnam	Southeast Asia	10°32'14"N	105°35'11"E	W1	NA	IRRI	NA	NA	P1	1	O. rufipogon	V	perennial	0.01	0.00383083	0	0.00127667	0	0	0.993555	0	0	0	0	0.0013375
NID435	IRGC86448	O. rufipogon	NA	O. rufipogon	Thailand	Southeast Asia	14°5'"N	101°5'"E	W1	NA	IRRI	DB	CU	P1	0.95	O. rufipogon	III	perennial	0.33	0	0	0.32548	0	0	0.67452	0	0	0	0	0
NID436	IRGC86454	O. rufipogon	O. rufipogon	O. rufipogon	Vietnam	Southeast Asia	14°20'59"N	109°6'0"E	W1	NA	IRRI	NA	NA	P1	1	O. rufipogon	In	perennial	0	0	0	0	0	0	1	0	0	0	0	0
NID437	IRGC86475	O. rufipogon	NA	O. rufipogon	India	South Asia	27°20'"N	82°10'"E	Admix of W1/ W6	NA	IRRI	DB	CU	P1	1	O. rufipogon	VIII	intermediate	0.05	0.00183	0.00139833	0.0406117	0.00188167	0	0.670697	0	0	0	0.0180475	0.265533
NID438	IRGC86476	O. rufipogon	NA	O. rufipogon	India	South Asia	26°10'"N	81°50'"E	Admix of W1/ W6	NA	IRRI	DB	CU	P1	0.551	O. rufipogon	VII	intermediate	0.32	0.00768667	0.00932	0.304422	0	0.0019825	0.462027	0	0	0	0.00874667	0.205816
NID439	IRGC86486	O. rufipogon	O. rufipogon	O. rufipogon	Thailand	Southeast Asia	14°25'"N	102°5'"E	W1	NA	IRRI	NA	NA	P1	1	O. rufipogon	I	perennial	0.01	0.00383083	0	0.00556833	0	0	0.986908	0	0	0	0	0.0036925
NID440	IRGC88787	O. rufipogon	NA	O. rufipogon	Bangladesh	South Asia	24°18'7"N	91°41'49"E	W1	NA	IRRI	DB	NA	P1	1	O. rufipogon	I	intermediate	0.48	0.00170417	0.01028	0.468278	0	0	0.515457	0	0	0.00428083	0	0
NID441	IRGC92605	O. rufipogon	NA	O. rufipogon	Indonesia	Southeast Asia	6°10'"S	106°44'"E	W1	NA	IRRI	NA	NA	P1	0.7	O. rufipogon	VII	perennial	NA	NA	NA	NA	NA	NA	NA	NA	NA	NA	NA	NA
NID442	IRGC93181	O. nivara	O. nivara	O. nivara	Nepal	South Asia	28°14'6"N	81°32'2"E	W5	NA	IRRI	DB	CU	P4	0.95	O. nivara	VI	intermediate	NA	NA	NA	NA	NA	NA	NA	NA	NA	NA	NA	NA
NID443	IRGC93183	O. nivara	O. nivara	O. nivara	Nepal	South Asia	28°2'23"N	81°37'39"E	W5	NA	IRRI	DB	CU	P4	0.95	O. nivara	In	annual	NA	NA	NA	NA	NA	NA	NA	NA	NA	NA	NA	NA
NID444	IRGC93188	O. nivara	O. nivara	O. nivara	Nepal	South Asia	28°19'29"N	81°16'23"E	W5	NA	IRRI	DB	CU	P4	0.95	O. nivara	VI	intermediate	NA	NA	NA	NA	NA	NA	NA	NA	NA	NA	NA	NA
NID445	IRGC93189	O. nivara	O. nivara	O. nivara	Nepal	South Asia	28°41'40"N	80°37'19"E	W5	NA	IRRI	DB	CU	P4	0.95	O. nivara	NA	NA	NA	NA	NA	NA	NA	NA	NA	NA	NA	NA	NA	NA
NID446	IRGC93224	Oryza hybr.	NA	O. spontanea	Nepal	South Asia	27°30'43"N	83°14'34"E	W5	NA	IRRI	DB	CU	P4	0.95	Oryza hybr.	In	intermediate	0.02	0	0.0152908	0	0	0	0	0	0	0	0.984709	0
NID447	IRGC93274	O. rufipogon	O. rufipogon	O. rufipogon	Indonesia	Southeast Asia	NA	NA	W3	NA	IRRI	NA	NA	P1	0.899	O. rufipogon	IV	annual	0	0	0	0	0	0	0.0226192	0	0.977381	0	0	0
NID448	IRGC100189	Oryza spp.	NA	O. nivara	Malaysia	Southeast Asia	2°1'49"N	109°38'33"E	W2	Or-IIIOr-I	IRRI	NA	NA	P4	0.75	Oryza spp.	NA	NA	NA	NA	NA	NA	NA	NA	NA	NA	NA	NA	NA	NA
NID449	IRGC100195	O. nivara	NA	O. nivara	Myanmar	Southeast Asia	17°37'12"N	96°35'5"E	Admix of W1/ W5	NA	IRRI	DB	CU	P4	1	O. nivara	In	intermediate	0.01	0	0	0.00772	0	0	0.90904	0	0	0	0.0171142	0.0661267
NID450	IRGC100916	Oryza hybr.	NA	O. nivara	China	East Asia	23°44'56"N	108°18'6"E	W2	NA	IRRI	DB	CU	P4	1	Oryza hybr.	VIII	intermediate	0.01	0	0.01277	0	0	0	0	0.983489	0	0.00374083	0	0
NID451	IRGC101508	O. nivara	NA	O. nivara	India	South Asia	21°7'40"N	82°48'2"E	Admix of W5/ W4	NA	IRRI	DB	CU	P4	0.95	O. nivara	VI	intermediate	0.46	0.00986667	0.441867	0.0059775	0	0.0034275	0.000908	0	0	0.00665167	0.528938	0.00236417
NID452	IRGC103308	Oryza hybr.	NA	O. rufipogon	Taiwan	East Asia	23°36'0"N	120°39'14"E	W6	NA	NA	DB	NA	NA	NA	Oryza hybr.	I	perennial	0.19	0.00552417	0	0	0.18432	0	0	0	0	0	0	0.810157
NID453	IRGC103404	O. rufipogon	NA	O. rufipogon	Bangladesh	South Asia	21°25'"N	92°0'"E	Admix of W1/ W2	NA	IRRI	DB	CU	P4	0.95	O. rufipogon	III	annual	0.34	0.0023275	0.00515083	0.30101	0.0186633	0.0153358	0.230254	0.337057	0.0044275	0.00648917	0.00371917	0.075565
NID454	IRGC103821	O. nivara	NA	O. nivara	China	East Asia	24°26'46"N	113°1'51"E	W6	Or-I	IRRI	DB	CU	P2/P3	0.6	O. nivara	I	perennial	0.67	0.0027375	0.0649742	0.474259	0.00219083	0.125313	0.0206992	0	0	0.0360525	0	0.273776
NID455	IRGC103823	Oryza spp.	NA	O. rufipogon	China	East Asia	24°26'46"N	113°1'51"E	Admix of W1/ W6	NA	IRRI	NA	NA	P1	0.9	Oryza spp.	VIII	annual	0.19	0.00122583	0.00127667	0.180131	0.0046075	0.000974	0.457373	0	0	0.00141167	0	0.353001
NID456	IRGC103824	O. nivara	NA	O. nivara	China	East Asia	24°26'46"N	113°1'51"E	Admix of W6/ W1	Or-I	IRRI	DB	CU	P2/P3	0.9	O. nivara	VIII	perennial	0.61	0	0.0114325	0.596492	0	0	0.0071075	0	0	0.00331	0	0.381657
NID457	IRGC103838	O. nivara	NA	O. nivara	Bangladesh	South Asia	24°25'"N	89°20'"E	Admix of W6/ W1	Or-I	IRRI	DB	CU	P1	0.6	O. nivara	VIII	perennial	0.75	0.0886967	0.065025	0.466955	0.0426633	0.0857967	0.172708	0.00746	0	0.0210683	0	0.0496258
NID458	IRGC103844	O. rufipogon	NA	O. rufipogon	Bangladesh	South Asia	25°33'"N	88°33'"E	W1	Or-I	IRRI	DB	CU	P1	0.7	O. rufipogon	VII	perennial	0.53	0	0.00552167	0.496854	0.009215	0.0170325	0.430692	0	0	0.00190667	0	0.0387767
NID459	IRGC103847	O. rufipogon	O. rufipogon	O. rufipogon	India	South Asia	20°10'"N	84°48'"E	W1	Or-II	IRRI	NA	NA	P1	1	O. rufipogon	VIII	perennial	0.06	0.00749583	0.0408775	0.0133808	0	0	0.866711	0.00302167	0	0.0471092	0	0.0214075
NID460	IRGC103848	O. rufipogon	NA	O. rufipogon	India	South Asia	20°10'59"N	84°25'58"E	W1	Or-III	IRRI	DB	CU	P1	1	O. rufipogon	VIII	perennial	0.39	0.00766	0.0111858	0.370449	0.00352917	0.00113583	0.583014	0	0	0	0	0.0230242
NID461	IRGC104057	O. rufipogon	NA	O. rufipogon	China	East Asia	NA	NA	W6	NA	IRRI	DB	CU	P1	0.5	O. rufipogon	I	perennial	0.53	0	0.0291125	0.476885	0.00400833	0.0234517	0.0124792	0.0218275	0	0.00698917	0.0367608	0.388486
NID462	IRGC104501	O. rufipogon	NA	O. rufipogon	India	South Asia	23°11'57"N	86°21'36"E	Admix of W1/ W4	NA	IRRI	DB	NA	P1	0.6	O. rufipogon	VIII	perennial	0.22	0.00535083	0.0133258	0.204496	0	0	0.676329	0	0	0.04962	0.000406	0.0504725
NID463	IRGC104599	O. rufipogon	O. rufipogon	O. rufipogon	Sri Lanka	South Asia	7°40'"N	80°10'"E	W2	NA	IRRI	DB	CU	P4	0.95	O. nivara 7	VIII	perennial	0	0	0	0	0	0	0.0319892	0.953953	0	0.0019325	0.00153583	0.0105892
NID464	IRGC104602	O. rufipogon	NA	O. rufipogon	Sri Lanka	South Asia	7°30'"N	79°50'"E	W1	NA	IRRI	NA	NA	P1	0.95	O. rufipogon	I	perennial	0.26	0	0	0.259574	0	0	0.734871	0.00414333	0	0	0	0.00141167
NID465	IRGC104620	Oryza hybr.	NA	O. spontanea	China	East Asia	22°57'44"N	113°29'14"E	W6	NA	IRRI	DB	CU	P1	0.9	Oryza hybr.	I	perennial	0.19	0	0.00854917	0.164981	0.0054025	0.0103925	0.010775	0	0	0	0	0.7999
NID466	IRGC104621	Oryza hybr.	NA	O. spontanea	China	East Asia	22°57'44"N	113°29'14"E	W6	NA	IRRI	NA	NA	P1	0.85	Oryza hybr.	NA	NA	0.27	0	0.0044675	0.25989	0.00460333	0.00385833	0.0155425	0	0	0	0	0.711638
NID467	IRGC104624	O. rufipogon	NA	O. rufipogon	China	East Asia	23°44'56"N	108°18'6"E	W6	NA	IRRI	DB	CU	P1	0.75	O. rufipogon	I	perennial	0.18	0	0	0.171725	0.00598083	0	0.0427475	0	0	0	0	0.779546
NID468	IRGC104626	Oryza hybr.	NA	O. spontanea	China	East Asia	23°44'56"N	108°18'6"E	W6	NA	IRRI	NA	NA	P1	0.452	Oryza hybr.	VIII	intermediate	0.18	0	0	0.165024	0.0102767	0	0	0	0	0	0	0.8247
NID469	IRGC104628	Oryza hybr.	NA	O. spontanea	China	East Asia	23°44'56"N	108°18'6"E	W6	NA	IRRI	NA	CU	P2/P3	0.7	Oryza hybr.	I	perennial	0.12	0.0114525	0.00355083	0.102838	0	0	0.0027775	0	0	0	0	0.879381
NID470	IRGC104632	Oryza hybr.	NA	O. spontanea	China	East Asia	23°44'56"N	108°18'6"E	W6	NA	IRRI	NA	NA	P1	0.95	Oryza hybr.	VIII	perennial	0.11	0	0.00268833	0.103878	0.0016725	0.00638417	0.0152658	0	0	0	0	0.870111
NID471	IRGC104634	Oryza spp.	NA	O. spontanea	China	East Asia	23°44'56"N	108°18'6"E	W6	NA	IRRI	DB	NA	P2/P3	0.8	Oryza spp.	III	perennial	0.54	0.00504	0	0.525755	0.00821917	0	0.0143983	0	0	0.0033925	0	0.443195
NID472	IRGC104636	Oryza hybr.	NA	O. spontanea	China	East Asia	23°44'56"N	108°18'6"E	W6	NA	IRRI	DB	CU	P4	1	Oryza hybr.	I	perennial	0.36	0.00211667	0	0.334064	0	0.028775	0.01497	0	0	0	0	0.620077
NID473	IRGC104644	O. nivara	O. nivara	O. nivara	Thailand	Southeast Asia	16°57'"N	100°35'"E	W4	NA	IRRI	DB	NA	P4	0.9	O. nivara	VIII	annual	NA	NA	NA	NA	NA	NA	NA	NA	NA	NA	NA	NA
NID474	IRGC104714	O. rufipogon	O. rufipogon	O. rufipogon	Thailand	Southeast Asia	14°19'49"N	100°31'48"E	W1	NA	IRRI	DB	NA	P1	1	O. rufipogon	I	perennial	0	0	0	0.00471583	0	0	0.992609	0	0.00109	0	0	0.001585
NID475	IRGC104823	O. nivara	NA	O. nivara	Thailand	Southeast Asia	13°31'44"N	99°48'51"E	Admix of W4/ W1	NA	IRRI	DB	NA	P1	0.648	O. nivara	III	annual	0.27	0	0.00959667	0.263365	0	0.00118917	0.261103	0	0	0.464747	0	0
NID476	IRGC104959	Oryza hybr.	NA	O. spontanea	China	East Asia	22°57'44"N	113°29'14"E	W6	NA	IRRI	NA	NA	P1	1	Oryza hybr.	I	intermediate	NA	NA	NA	NA	NA	NA	NA	NA	NA	NA	NA	NA
NID477	IRGC104967	Oryza spp.	NA	O. spontanea	China	East Asia	23°21'59"N	113°12'0"E	Admix of W1/ W4	NA	IRRI	DB	CU	P2/P3	0.75	Oryza spp.	I	perennial	0.65	0	0.0107567	0.633568	0.00104583	0.0035675	0.0332575	0	0	0.317805	0	0
NID480	IRGC105250	O. rufipogon	O. rufipogon	O. rufipogon	Thailand	Southeast Asia	14°20'57"N	100°33'33"E	W1	NA	IRRI	NA	NA	P1	1	O. rufipogon	VIII	intermediate	0.01	0	0	0.0062	0	0	0.9938	0	0	0	0	0
NID481	IRGC105343	O. nivara	NA	O. nivara	India	South Asia	11°51'"N	75°51'"E	W2	NA	IRRI	DB	CU	P2/P3	0.6	O. nivara	I	intermediate	NA	NA	NA	NA	NA	NA	NA	NA	NA	NA	NA	NA
NID482	IRGC105349	O. rufipogon	O. rufipogon	O. rufipogon	India	South Asia	10°30'"N	76°6'"E	W2	NA	IRRI	DB	CU	P4	0.85	O. nivara 7	I	intermediate	NA	NA	NA	NA	NA	NA	NA	NA	NA	NA	NA	NA
NID483	IRGC105375	O. rufipogon	NA	O. rufipogon	Thailand	Southeast Asia	19°40'"N	100°0'"E	W2	NA	IRRI	DB	CU	P1	0.75	O. rufipogon	I	intermediate	NA	NA	NA	NA	NA	NA	NA	NA	NA	NA	NA	NA
NID484	IRGC105388	O. rufipogon	NA	O. rufipogon	Thailand	Southeast Asia	16°0'"N	99°40'"E	Admix of W1/ W4	NA	IRRI	DB	CU	P1	0.95	O. rufipogon	VIII	annual	0.01	0	0	0.0082225	0	0.0027075	0.580419	0	0	0.408652	0	0
NID485	IRGC105400	O. rufipogon	O. rufipogon	O. rufipogon	China	East Asia	NA	NA	W6	NA	IRRI	NA	NA	P1	0.95	O. rufipogon	III	NA	NA	NA	NA	NA	NA	NA	NA	NA	NA	NA	NA	NA
NID486	IRGC105402	O. rufipogon	O. rufipogon	O. rufipogon	China	East Asia	NA	NA	W6	NA	IRRI	NA	NA	P1	0.85	O. rufipogon	I	annual	NA	NA	NA	NA	NA	NA	NA	NA	NA	NA	NA	NA
NID487	IRGC105428	O. nivara	O. nivara	O. nivara	Sri Lanka	South Asia	6°10'"N	81°30'"E	W2	NA	IRRI	DB	CU	P4	0.95	O. nivara	I	perennial	0.02	0	0.0243592	0	0	0	0.0387183	0.913458	0	0.0206833	0.00278	0
NID488	IRGC105491	Oryza spp.	NA	O. rufipogon	Malaysia	Southeast Asia	5°6'54"N	101°53'20"E	W4	Or-I	IRRI	DB	CU	P2/P3	0.8	Oryza spp.	I	annual	NA	NA	NA	NA	NA	NA	NA	NA	NA	NA	NA	NA
NID490	IRGC105567	O. rufipogon	O. rufipogon	O. rufipogon	Indonesia	Southeast Asia	3°0'"S	114°55'"E	W1	Or-II	IRRI	DB	CU	P1	1	O. rufipogon	VIII	perennial	NA	NA	NA	NA	NA	NA	NA	NA	NA	NA	NA	NA
NID491	IRGC105568	O. rufipogon	O. rufipogon	O. rufipogon	Philippines	Southeast Asia	7°52'48"N	125°0'21"E	W2	Or-III	IRRI	NA	NA	P4	0.85	O. nivara 7	VIII	NA	0.05	0	0.0252033	0.0201483	0.001075	0	0.0203583	0.928459	0	0.004755	0	0
NID492	IRGC105569	O. rufipogon	O. rufipogon	O. rufipogon	Cambodia	Southeast Asia	12°46'17"N	102°38'44"E	W2	Or-I	IRRI	DB	CU	P4	0.85	O. nivara 7	VIII	intermediate	0.04	0	0.0223133	0.0201483	0.001075	0	0.0210717	0.930636	0	0.004755	0	0
NID493	IRGC105706	O. nivara	O. nivara	O. nivara	Nepal	South Asia	28°10'"N	82°30'"E	W5	NA	IRRI	DB	CU	P4	0.95	O. nivara	VI	intermediate	NA	NA	NA	NA	NA	NA	NA	NA	NA	NA	NA	NA
NID494	IRGC105711	O. rufipogon	NA	O. rufipogon	India	South Asia	7°55'"N	77°30'"E	W2	NA	IRRI	DB	CU	P4	1	O. rufipogon	I	NA	0.01	0	0.00943917	0.00385583	0	0	0.00732	0.979384	0	0	0	0
NID495	IRGC105717	O. nivara	NA	O. nivara	Cambodia	Southeast Asia	11°25'"N	104°56'"E	Admix of W4/ W1	NA	IRRI	DB	CU	P4	0.8	O. nivara	III	annual	0.24	0	0.00689083	0.231083	0.000771	0	0.293806	0	0	0.456182	0	0.0112667
NID496	IRGC105720	O. rufipogon	O. rufipogon	O. rufipogon	Cambodia	Southeast Asia	11°25'"N	104°59'"E	W1	NA	IRRI	DB	CU	P1	1	O. rufipogon	VIII	NA	0.1	0	0.00131083	0.0991433	0	0	0.781488	0	0	0.113642	0	0.00441583
NID497	IRGC105726	O. rufipogon	NA	O. rufipogon	Cambodia	Southeast Asia	11°20'"N	104°40'"E	W1	NA	IRRI	NA	NA	P4	0.549	O. rufipogon	VIII	annual	0.08	0.00398667	0.00111083	0.0768833	0.000973	0	0.85984	0	0	0.0572058	0	0
NID498	IRGC105735	O. rufipogon	NA	O. rufipogon	Cambodia	Southeast Asia	11°5'"N	104°50'"E	Admix of W1/ W4	NA	IRRI	DB	CU	P2/P3	0.7	O. rufipogon	I	annual	0.35	0	0.0055175	0.347603	0	0	0.294045	0	0	0.329339	0	0.0234967
NID499	IRGC105767	O. rufipogon	NA	O. rufipogon	Thailand	Southeast Asia	14°35'"N	102°55'"E	W1	NA	IRRI	DB	CU	P2/P3	0.9	O. rufipogon	VIII	perennial	0.28	0	0.01052	0.269091	0	0.00480583	0.547446	0	0	0.168137	0	0
NID500	IRGC105785	O. nivara	NA	O. nivara	Thailand	Southeast Asia	15°0'"N	104°10'"E	Admix of W1/ W4	NA	IRRI	DB	NA	P4	0.65	O. nivara	VIII	perennial	0.73	0.00345667	0.00160583	0.720661	0	0.002725	0.06929	0	0	0.200355	0	0.00190667
NID501	IRGC105821	O. nivara	NA	O. nivara	Thailand	Southeast Asia	17°20'"N	102°55'"E	Admix of W4/ W1	NA	IRRI	DB	CU	P4	0.9	O. nivara	VIII	perennial	0.51	0.00581667	0.0103417	0.496132	0	0	0.140614	0	0	0.329987	0	0.0171083
NID503	IRGC105843	O. rufipogon	NA	O. rufipogon	Thailand	Southeast Asia	16°5'"N	102°10'"E	W1	NA	IRRI	DB	CU	P1	0.95	O. rufipogon	VII	perennial	0.36	0	0	0.359594	0	0	0.638609	0	0	0	0	0.0017975
NID504	IRGC105847	O. rufipogon	O. rufipogon	O. rufipogon	Thailand	Southeast Asia	15°45'"N	102°5'"E	W1	NA	IRRI	NA	NA	P1	1	O. rufipogon	III	perennial	0	0	0	0.00464083	0	0	0.994958	0	0	0	0	0.000402
NID505	IRGC105855	O. rufipogon	NA	O. rufipogon	Thailand	Southeast Asia	15°5'"N	102°40'"E	W1	NA	IRRI	DB	CU	P1	0.95	O. rufipogon	III	NA	0.36	0	0	0.355587	0.000528	0	0.643887	0	0	0	0	0
NID506	IRGC105879	O. nivara	NA	O. nivara	Bangladesh	South Asia	23°5'"N	89°25'"E	W4	NA	IRRI	DB	CU	P2/P3	0.9	O. nivara	I	NA	0.68	0.0160792	0.624312	0.0416608	0	0.00241833	0.0409725	0.00169917	0	0.270083	0.00277583	0
NID507	IRGC105881	O. rufipogon	O. rufipogon	O. rufipogon	Bangladesh	South Asia	23°0'"N	89°25'"E	W1	NA	IRRI	NA	NA	P1	1	O. rufipogon	III	perennial	0.04	0.00276833	0	0.0339542	0	0	0.9274	0	0	0.0319583	0	0.00391833
NID508	IRGC105890	O. rufipogon	NA	O. rufipogon	Bangladesh	South Asia	22°50'"N	89°30'"E	Admix of W1/ W6	NA	IRRI	DB	CU	P2/P3	0.9	O. rufipogon	III	perennial	0.42	0.0990892	0.0333467	0.140342	0.0283025	0.118196	0.54157	0	0	0.00564583	0	0.0335092
NID509	IRGC105897	O. rufipogon	NA	O. rufipogon	Bangladesh	South Asia	23°50'"N	90°30'"E	W1	NA	IRRI	DB	CU	P1	1	O. rufipogon	VIII	annual	0.81	0	0.00507417	0.762346	0	0.0391083	0.181313	0	0	0	0	0.0121583
NID510	IRGC105898	O. rufipogon	NA	O. rufipogon	Bangladesh	South Asia	24°10'"N	91°20'"E	Admix of W1/ W2	NA	IRRI	NA	NA	P1	0.9	O. rufipogon	III	perennial	0.01	0	0.000941	0.00111083	0.003965	0.0021675	0.88021	0.111605	0	0	0	0
NID511	IRGC105909	O. rufipogon	O. rufipogon	O. rufipogon	Thailand	Southeast Asia	14°30'"N	100°40'"E	W1	NA	IRRI	NA	NA	P1	1	O. rufipogon	III	perennial	NA	NA	NA	NA	NA	NA	NA	NA	NA	NA	NA	NA
NID512	IRGC105942	O. rufipogon	NA	O. rufipogon	Thailand	Southeast Asia	6°20'"N	101°50'"E	W1	NA	IRRI	NA	NA	P1	0.65	O. rufipogon	VIII	perennial	NA	NA	NA	NA	NA	NA	NA	NA	NA	NA	NA	NA
NID513	IRGC105951	O. rufipogon	O. rufipogon	O. rufipogon	Indonesia	Southeast Asia	6°28'"S	106°55'"E	W1	NA	IRRI	NA	NA	P1	1	O. rufipogon	VIII	perennial	0	0	0	0	0	0	1	0	0	0	0	0
NID514	IRGC105956	O. rufipogon	NA	O. rufipogon	Indonesia	Southeast Asia	6°8'"S	106°10'"E	W1	NA	IRRI	DB	CU	P1	1	O. rufipogon	VIII	perennial	0.2	0.00124333	0.01577	0.185878	0	0	0.779056	0	0	0.0132808	0	0.00477083
NID515	IRGC105958	O. rufipogon	NA	O. rufipogon	Indonesia	Southeast Asia	6°4'"S	106°5'"E	W1	NA	IRRI	NA	NA	P1	0.55	O. rufipogon	VIII	perennial	0	0	0	0	0	0	0.99643	0	0.00357	0	0	0
NID516	IRGC106036	O. rufipogon	NA	O. rufipogon	Malaysia	Southeast Asia	6°0'"N	102°5'"E	W1	NA	IRRI	NA	NA	P2/P3	0.9	O. rufipogon	III	perennial	0.58	0.00888667	0	0.568099	0	0	0.410281	0	0	0	0	0.0127325
NID517	IRGC106057	O. rufipogon	NA	O. rufipogon	India	South Asia	22°22'"N	85°48'"E	W1	NA	IRRI	NA	NA	P4	0.65	O. rufipogon	VIII	NA	0.12	0.0210942	0.024145	0.0783758	0	0	0.785918	0.00257667	0	0.0203908	0.00218667	0.0653158
NID518	IRGC106078	O. rufipogon	NA	O. rufipogon	India	South Asia	23°20'"N	85°45'"E	Admix of W1/ W4	NA	IRRI	DB	NA	P2/P3	0.5	O. rufipogon	I	annual	0.06	0	0	0.0601758	0	0.00215083	0.403023	0.169977	0	0.350073	0	0.0145975
NID519	IRGC106115	O. rufipogon	O. rufipogon	O. rufipogon	India	South Asia	23°5'"N	88°20'"E	W1	NA	IRRI	NA	NA	P1	0.907	O. rufipogon	VII	perennial	0.11	0.0118792	0.00348333	0.0734525	0.0136683	0.00410167	0.825378	0	0	0.0109067	0	0.0571333
NID520	IRGC106144	O. rufipogon	NA	O. rufipogon	India	South Asia	23°0'"N	88°10'"E	Admix of W1/ W4	NA	IRRI	NA	NA	P1	1	O. rufipogon	III	perennial	0.29	0.0043	0.181921	0.102769	0	0.00308333	0.623723	0	0	0.0753817	0.00134417	0.00747667
NID521	IRGC106145	O. rufipogon	O. rufipogon	O. rufipogon	Laos	Southeast Asia	18°0'"N	102°40'"E	W1	NA	IRRI	NA	NA	P1	1	O. rufipogon	VII	perennial	0.01	0	0	0.0148692	0	0	0.985131	0	0	0	0	0
NID522	IRGC106150	O. rufipogon	O. rufipogon	O. rufipogon	Laos	Southeast Asia	18°0'"N	102°40'"E	W1	NA	IRRI	NA	NA	P1	1	O. rufipogon	VIII	perennial	0	0	0	0	0	0	0.994664	0	0	0	0	0.00533583
NID523	IRGC106155	O. nivara	NA	O. nivara	Laos	Southeast Asia	18°0'"N	102°40'"E	Admix of W4/ W1	NA	NA	DB	CU	NA	NA	O. nivara	VIII	annual	0.5	0.00133917	0.0038975	0.490972	0	0.00369333	0.198594	0	0	0.289686	0	0.0118183
NID524	IRGC106156	O. rufipogon	O. rufipogon	O. rufipogon	Laos	Southeast Asia	18°0'"N	102°40'"E	W1	NA	IRRI	NA	NA	P1	0.95	O. rufipogon	VIII	perennial	0.14	0.000812	0.00739667	0.128489	0	0.00148667	0.824066	0	0	0	0	0.0377508
NID525	IRGC106161	O. rufipogon	O. rufipogon	O. rufipogon	Laos	Southeast Asia	18°0'"N	102°40'"E	W1	NA	IRRI	NA	NA	P1	1	O. rufipogon	VIII	perennial	0.18	0.000923	0	0.176729	0	0	0.814902	0	0	0	0	0.007445
NID526	IRGC106163	O. rufipogon	O. rufipogon	O. rufipogon	Laos	Southeast Asia	18°0'"N	102°40'"E	W1	NA	IRRI	NA	NA	P1	1	O. rufipogon	VIII	intermediate	0.01	0.000807	0	0.00437917	0	0	0.988653	0	0	0	0	0.00616167
NID528	IRGC106168	O. rufipogon	NA	O. rufipogon	Vietnam	Southeast Asia	21°25'"N	103°'"E	Admix of W1/ W6	NA	IRRI	NA	NA	P1	0.65	O. rufipogon	I	intermediate	0.22	0	0.01468	0.197189	0.00267667	0.006025	0.221021	0.322875	0	0	0.001765	0.233768
NID529	IRGC106169	O. rufipogon	O. rufipogon	O. rufipogon	Vietnam	Southeast Asia	21°25'"N	103°'"E	W1	NA	IRRI	NA	NA	P1	1	O. rufipogon	I	perennial	0.11	0	0	0.107103	0	0	0.835897	0	0.00124167	0	0	0.0557575
NID530	IRGC106273	O. rufipogon	O. rufipogon	O. rufipogon	Papua New Guinea	Australasia	6°45'"S	141°20'"E	W3	NA	IRRI	NA	NA	P1	1	O. rufipogon	IV	perennial	NA	NA	NA	NA	NA	NA	NA	NA	NA	NA	NA	NA
NID531	IRGC106283	O. rufipogon	O. rufipogon	O. rufipogon	Papua New Guinea	Australasia	6°35'"S	141°15'"E	W3	NA	IRRI	NA	NA	P1	1	O. rufipogon	IV	perennial	0	0	0	0	0	0	0	0	1	0	0	0
NID533	IRGC106327	O. rufipogon	NA	O. rufipogon	Cambodia	Southeast Asia	11°10'"N	105°25'"E	Admix of W1/ W2	NA	IRRI	NA	NA	P1	0.9	O. rufipogon	III	perennial	0.08	0	0	0.0766708	0.00073	0	0.561629	0.354417	0	0	0	0.0065525
NID535	IRGC106342	O. rufipogon	NA	O. rufipogon	Myanmar	Southeast Asia	17°3'"N	96°11'"E	W1	NA	IRRI	NA	NA	P1	0.65	O. rufipogon	III	perennial	0.44	0.0017925	0.022175	0.416762	0	0	0.555294	0	0	0.000608	0	0.0033675
NID536	IRGC106357	O. rufipogon	O. rufipogon	O. rufipogon	Myanmar	Southeast Asia	16°40'"N	96°30'"E	W1	NA	IRRI	NA	NA	P1	0.95	O. rufipogon	VIII	perennial	0	0	0	0	0	0	0.99927	0	0	0	0	0.00073
NID538	IRGC106410	O. rufipogon	NA	O. rufipogon	Vietnam	Southeast Asia	9°53'12"N	105°42'53"E	W2	NA	IRRI	DB	CU	P1	1	O. rufipogon	NA	NA	0.05	0	0.0280925	0.0201483	0	0	0.021785	0.925218	0	0.004755	0	0
NID539	IRGC106412	O. rufipogon	O. rufipogon	O. rufipogon	Vietnam	Southeast Asia	9°47'27"N	105°39'16"E	W1	NA	IRRI	NA	NA	P1	1	O. rufipogon	V	perennial	NA	NA	NA	NA	NA	NA	NA	NA	NA	NA	NA	NA
NID540	IRGC106413	O. rufipogon	O. rufipogon	O. rufipogon	Vietnam	Southeast Asia	9°47'15"N	105°43'40"E	W1	NA	IRRI	DB	NA	P1	1	O. rufipogon	V	perennial	0.09	0	0.00267417	0.0831617	0.0013625	0	0.910383	0	0	0	0	0.00241833
NID541	IRGC106414	O. rufipogon	NA	O. rufipogon	Vietnam	Southeast Asia	9°47'15"N	105°43'40"E	W1	NA	IRRI	NA	NA	P1	0.55	O. rufipogon	V	perennial	0.08	0.00104583	0	0.0758875	0	0	0.919018	0	0	0	0	0.0040475
NID542	IRGC106415	O. rufipogon	O. rufipogon	O. rufipogon	Vietnam	Southeast Asia	9°47'15"N	105°43'40"E	W1	NA	IRRI	NA	NA	P1	1	O. rufipogon	NA	NA	0	0	0	0.00143667	0	0	0.998563	0	0	0	0	0
NID543	IRGC106420	O. rufipogon	O. rufipogon	O. rufipogon	Vietnam	Southeast Asia	10°29'0"N	105°44'0"E	W1	NA	IRRI	NA	NA	P1	1	O. rufipogon	VIII	perennial	0	0	0	0.00265417	0	0	0.984773	0	0.0125733	0	0	0
NID544	IRGC106452	O. rufipogon	O. rufipogon	O. rufipogon	Indonesia	Southeast Asia	3°30'"S	104°40'"E	W1	NA	IRRI	NA	NA	P1	0.95	O. rufipogon	NA	NA	0	0	0	0	0	0	1	0	0	0	0	0
NID545	IRGC106453	O. rufipogon	O. rufipogon	O. rufipogon	Indonesia	Southeast Asia	3°5'"S	104°30'"E	W1	NA	IRRI	NA	NA	P1	1	O. rufipogon	VIII	perennial	0.01	0	0	0.0148367	0	0	0.985163	0	0	0	0	0
NID546	IRGC106509	O. rufipogon	O. rufipogon	O. rufipogon	Myanmar	Southeast Asia	16°58'"N	94°56'"E	W1	NA	IRRI	NA	NA	P1	1	O. rufipogon	In	perennial	0	0	0	0.00117583	0	0	0.996304	0	0	0	0	0.00252
NID549	IRGC81881	O. rufipogon	NA	O. rufipogon	India	South Asia	25°30'"N	84°8'"E	Admix of W1/ W6	NA	IRRI	DB	CU	P1	0.75	O. rufipogon	VIII	perennial	0.06	0.004265	0.0463575	0.00522	0.00251083	0.0023125	0.660045	0	0	0.0182783	0.0606458	0.200364
NID550	IRGC81887	O. rufipogon	NA	O. rufipogon	India	South Asia	27°0'"N	83°20'"E	Admix of W1/ W6	NA	IRRI	NA	NA	P1	0.45	O. rufipogon	VIII	perennial	0.02	0.00115083	0.003825	0.0160767	0	0.000386	0.666946	0	0	0.00598917	0.0296458	0.275981
NID551	IRGC100596	Oryza spp.	NA	O. rufipogon	Taiwan	East Asia	23°36'0"N	120°39'14"E	W6	NA	NA	DB	CU	NA	NA	Oryza spp.	In	perennial	0.4	0.0305292	0	0.00163917	0.334569	0.0285342	0	0	0	0	0	0.604727
NID552	IRGC100920	Oryza hybr.	NA	O. rufipogon	Malaysia	Southeast Asia	2°1'49"N	109°38'33"E	W1	Or-I	IRRI	NA	NA	P4	0.55	Oryza hybr.	VIII	perennial	0.48	0	0.00141167	0.481412	0	0	0.512951	0.0021825	0	0.00159667	0	0.000446
NID553	IRGC100926	Oryza hybr.	NA	O. rufipogon	Myanmar	Southeast Asia	NA	NA	W1	Or-II	IRRI	DB	CU	P2/P3	0.9	Oryza hybr.	II	annual	0.82	0.0022375	0	0.818628	0	0	0.151553	0	0	0.0176175	0	0.00996333
NID555	IRGC105349	O. rufipogon	NA	O. rufipogon	India	South Asia	10°30'"N	76°6'"E	W2	NA	NA	DB	CU	NA	NA	O. rufipogon	V	intermediate	0	0	0	0	0	0	0	1	0	0	0	0
NID556	IRGC105494	O. rufipogon	O. rufipogon	O. rufipogon	Myanmar	Southeast Asia	18°49'0"N	95°13'0"E	W4	Or-I	IRRI	DB	NA	P4	0.95	O. nivara 7	I	annual	0.1	0	0.0110233	0.0820633	0.00379083	0.00366417	0.0401192	0	0	0.859338	0	0
NID557	IRGC105567	O. rufipogon	NA	O. rufipogon	Indonesia	Southeast Asia	3°0'"S	114°55'"E	W1	Or-II	NA	DB	NA	NA	NA	O. rufipogon	II	perennial	0.39	0.000932	0	0.382835	0	0.001585	0.492748	0.11829	0	0.00186417	0	0.00174417
NID558	IRGC105616	O. rufipogon	O. rufipogon	O. rufipogon	China	East Asia	23°44'56"N	108°18'6"E	W4	NA	IRRI	DB	NA	P4	1	O. nivara 7	VIII	NA	0.13	0	0.13026	0.00297833	0	0	0	0	0	0.861648	0.00511167	0
NID559	IRGC105618	Oryza spp.	NA	O. rufipogon	China	East Asia	23°44'56"N	108°18'6"E	Admix of W6/ W1	NA	NA	DB	NA	NA	NA	Oryza spp.	V	annual	0.43	0.0023525	0.0028875	0.42656	0	0.00239333	0.0841358	0	0	0.155077	0	0.326593
NID568	IRGC106263	O. rufipogon	NA	O. rufipogon	Papua New Guinea	Australasia	6°40'"S	141°20'"E	Admix of W1/ W4	NA	NA	DB	CU	NA	NA	O. rufipogon	VIII	perennial	0.18	0	0.0033175	0.173574	0	0	0.414177	0	0	0.408931	0	0
NID592	IRGC80671	O. rufipogon	NA	O. rufipogon	India	South Asia	20°38'"N	81°27'"E	W1	NA	NA	DB	CU	NA	NA	O. rufipogon	VIII	perennial	0.4	0.00139833	0.00667833	0.395512	0.000263	0.000508	0.544028	0.0226767	0	0.013575	0.00200917	0.01335
NID599	IRGC100183	Oryza spp.	NA	O. rufipogon	India	South Asia	21°7'40"N	82°48'2"E	Admix of W1/ W6	NA	NA	DB	NA	NA	NA	Oryza spp.	V	perennial	0.47	0.0620742	0.01152	0.365872	0.00685583	0.0221383	0.355428	0.0057325	0	0.0670683	0	0.103311
NID600	IRGC100187	Oryza spp.	NA	O. sativa	Malaysia	Southeast Asia	2°1'49"N	109°38'33"E	W1	Or-II	NA	DB	CU	NA	NA	Oryza spp.	I	perennial	0.65	0	0	0.646578	0	0.0056775	0.330517	0	0	0	0	0.0172275
NID602	IRGC100900	O. nivara	NA	O. nivara	India	South Asia	19°26'2"N	83°41'45"E	W2	Or-III	NA	DB	CU	NA	NA	O. nivara	VIII	intermediate	0	0	0	0	0	0	0	1	0	0	0	0
NID604	IRGC100907	Oryza hybr.	NA	O. rufipogon	Taiwan	East Asia	25°6'27"N	121°43'55"E	W6	NA	NA	DB	NA	NA	NA	Oryza hybr.	I	NA	NA	NA	NA	NA	NA	NA	NA	NA	NA	NA	NA	NA
NID605	IRGC100911	Oryza spp.	NA	O. spontanea	Thailand	Southeast Asia	13°40'"N	100°50'"E	W1	Or-I	NA	DB	CU	NA	NA	Oryza spp.	I	perennial	0.86	0	0.00150083	0.858302	0	0.00324583	0.131947	0	0	0.00366667	0	0.00133917
NID607	IRGC102178	O. nivara	NA	O. nivara	India	South Asia	26°59'0"N	84°23'59"E	W5	NA	NA	DB	NA	NA	NA	O. nivara	VI	NA	NA	NA	NA	NA	NA	NA	NA	NA	NA	NA	NA	NA
NID655	IRGC100898	O. nivara	O. nivara	O. nivara	India	South Asia	20°14'0"N	85°49'59"E	W2	Or-I	IRRI	NA	NA	P4	0.95	O. nivara	VIII	intermediate	NA	NA	NA	NA	NA	NA	NA	NA	NA	NA	NA	NA
NID657	IRGC104705	O. nivara	O. nivara	O. nivara	India	South Asia	16°20'"N	73°35'"E	W2	NA	IRRI	NA	NA	P4	0.9	O. nivara	In	intermediate	NA	NA	NA	NA	NA	NA	NA	NA	NA	NA	NA	NA
NID660	IRGC82993	O. rufipogon	O. rufipogon	O. rufipogon	China	East Asia	NA	NA	W6	NA	IRRI	NA	NA	P1	1	O. rufipogon	I	perennial	0.19	0.00625	0	0.16874	0.00947583	0.00426417	0.0199592	0	0	0	0	0.791312
NID661	IRGC99554	Oryza hybr.	NA	O. rufipogon	China	East Asia	NA	NA	W6	NA	IRRI	NA	NA	P4	0.598	Oryza hybr.	I	annual	0.43	0.00651917	0	0.410593	0.0014375	0.0085975	0.0268433	0	0	0	0	0.546008
NID662	IRGC99555	Oryza hybr.	NA	O. rufipogon	China	East Asia	NA	NA	W6	NA	IRRI	NA	NA	P2/P3	0.55	Oryza hybr.	I	perennial	0.18	0	0	0.166505	0.00497333	0.00643083	0.0168908	0	0	0	0	0.805199
NID663	IRGC99556	Oryza hybr.	NA	O. rufipogon	China	East Asia	NA	NA	Admix of W1/ W6	NA	IRRI	NA	NA	P2/P3	0.9	Oryza hybr.	I	perennial	0.43	0.00625	0	0.420137	0.00317833	0.00359917	0.286191	0	0	0	0	0.280643
NID665	IRGC100203	Oryza spp.	NA	O. rufipogon	Myanmar	Southeast Asia	13°58'47"N	98°40'58"E	Admix of W1/ W4	Or-I	IRRI	DB	CU	P2/P3	0.9	Oryza spp.	VIII	intermediate	0.71	0.0123875	0.0444392	0.604349	0.0166342	0.0309475	0.213617	0	0	0.0314925	0	0.0461317
NID666	IRGC100211	O. rufipogon	O. rufipogon	O. rufipogon	India	South Asia	10°28'19"N	76°25'28"E	W2	NA	IRRI	DB	CU	P4	0.95	O. nivara 7	VIII	annual	NA	NA	NA	NA	NA	NA	NA	NA	NA	NA	NA	NA
NID668	IRGC100588	Oryza hybr.	NA	O. rufipogon	Taiwan	East Asia	23°36'0"N	120°39'14"E	W6	NA	IRRI	NA	NA	P1	0.7	Oryza hybr.	III	intermediate	NA	NA	NA	NA	NA	NA	NA	NA	NA	NA	NA	NA
NID669	IRGC100593	O. nivara	NA	O. nivara	Taiwan	East Asia	23°36'0"N	120°39'14"E	W6	NA	IRRI	DB	CU	P2/P3	0.75	O. nivara	I	perennial	NA	NA	NA	NA	NA	NA	NA	NA	NA	NA	NA	NA
NID670	IRGC100597	Oryza spp.	NA	O. rufipogon	Taiwan	East Asia	23°36'0"N	120°39'14"E	W6	NA	IRRI	NA	NA	P2/P3	0.95	Oryza spp.	VIII	perennial	0.73	0.0010875	0.00476167	0.48722	0.220022	0.0178517	0	0	0	0	0	0.269057
NID671	IRGC100599	Oryza hybr.	NA	O. rufipogon	Taiwan	East Asia	23°36'0"N	120°39'14"E	W6	NA	IRRI	NA	NA	P2/P3	0.9	Oryza hybr.	I	annual	0.35	0.0120708	0	0.00109583	0.32142	0.0133817	0	0	0	0	0	0.652032
NID672	IRGC100639	Oryza spp.	NA	O. rufipogon	Taiwan	East Asia	23°36'0"N	120°39'14"E	W6	NA	IRRI	NA	NA	P1	0.45	Oryza spp.	VIII	annual	NA	NA	NA	NA	NA	NA	NA	NA	NA	NA	NA	NA
NID673	IRGC100647	Oryza spp.	NA	O. rufipogon	Taiwan	East Asia	23°36'0"N	120°39'14"E	W6	NA	IRRI	DB	CU	P2/P3	0.9	Oryza spp.	In	intermediate	NA	NA	NA	NA	NA	NA	NA	NA	NA	NA	NA	NA
NID674	IRGC100657	O. rufipogon	NA	O. rufipogon	Taiwan	East Asia	23°36'0"N	120°39'14"E	Admix of W4/ W6	NA	IRRI	NA	NA	P2/P3	0.9	O. rufipogon	VIII	intermediate	0.55	0.006005	0.201773	0.330722	0.00349167	0.00582167	0.0127992	0.0028225	0	0.174563	0.0031375	0.258867
NID675	IRGC100678	Oryza spp.	NA	O. rufipogon	Taiwan	East Asia	23°36'0"N	120°39'14"E	W6	NA	IRRI	NA	NA	P2/P3	0.95	Oryza spp.	I	intermediate	0.57	0	0	0.237803	0.318292	0.0149425	0.0261708	0.10607	0	0.00104083	0	0.295682
NID676	IRGC100692	O. rufipogon	NA	O. rufipogon	Taiwan	East Asia	23°36'0"N	120°39'14"E	W6	NA	IRRI	DB	CU	P2/P3	0.95	O. rufipogon	VIII	annual	NA	NA	NA	NA	NA	NA	NA	NA	NA	NA	NA	NA
NID677	IRGC100897	O. nivara	O. nivara	O. nivara	India	South Asia	20°21'44"N	86°0'11"E	W4	Or-I	IRRI	NA	NA	P4	1	O. nivara	VIII	NA	NA	NA	NA	NA	NA	NA	NA	NA	NA	NA	NA	NA
NID681	IRGC100903	O. nivara	O. nivara	O. nivara	India	South Asia	16°55'0"N	81°49'59"E	W4	Or-III	IRRI	DB	NA	P4	1	O. nivara	VIII	annual	0.08	0.00344833	0.0572758	0.02191	0	0	0.00117667	0	0	0.912687	0.00148667	0.00201583
NID682	IRGC100904	Oryza hybr.	NA	O. rufipogon	Thailand	Southeast Asia	13°43'24"N	100°28'33"E	W1	Or-II	IRRI	DB	CU	P1	1	Oryza hybr.	VIII	annual	0.43	0	0	0.430642	0	0	0.569357	0	0	0	0	0
NID683	IRGC100918	O. nivara	NA	O. nivara	Cambodia	Southeast Asia	13°6'"N	103°12'"E	Admix of W4/ W1	NA	IRRI	DB	CU	P1	0.7	O. nivara	III	intermediate	0.33	0	0	0.334989	0	0	0.138341	0	0	0.522357	0	0.00431333
NID685	IRGC100923	O. rufipogon	NA	O. rufipogon	Myanmar	Southeast Asia	16°44'59"N	96°14'59"E	Admix of W4/ W1	Or-I	IRRI	DB	CU	P2/P3	0.9	O. rufipogon	VIII	annual	0.71	0.0111017	0.0533883	0.644905	0	0	0.01278	0	0	0.266628	0	0.0111967
NID686	IRGC100926	Oryza hybr.	NA	O. rufipogon	Myanmar	Southeast Asia	NA	NA	Admix of W1/ W6	Or-II	NA	DB	CU	NA	NA	Oryza hybr.	VIII	perennial	0.78	0.00271	0.011935	0.767748	0	0	0.135201	0.00577917	0	0.00371583	0.0372017	0.0357067
NID687	IRGC101193	Oryza hybr.	NA	O. rufipogon	Taiwan	East Asia	23°36'0"N	120°39'14"E	Admix of W6/ W1	NA	IRRI	DB	CU	P2/P3	0.95	Oryza hybr.	VIII	intermediate	0.49	0	0.00679417	0.480274	0	0.00441167	0.0202033	0	0	0	0	0.488315
NID688	IRGC101450	O. nivara	NA	O. nivara	Taiwan	East Asia	23°36'0"N	120°39'14"E	W4	NA	IRRI	NA	NA	P4	1	O. nivara	VIII	annual	0.44	0.0163258	0.415456	0.00202583	0.0084225	0	0	0.0024775	0.01482	0.532517	0.00795417	0
NID690	IRGC101942	Oryza hybr.	NA	O. rufipogon	Malaysia	Southeast Asia	2°1'49"N	109°38'33"E	W2	Or-III	IRRI	NA	NA	P4	0.9	Oryza hybr.	VIII	intermediate	0	0	0.00144	0	0	0	0.00065	0.990828	0	0.0060675	0.00101417	0
NID691	IRGC101967	O. nivara	O. nivara	O. nivara	India	South Asia	19°40'"N	82°30'"E	W4	Or-I	IRRI	DB	CU	P4	0.95	O. nivara	III	perennial	NA	NA	NA	NA	NA	NA	NA	NA	NA	NA	NA	NA
NID692	IRGC101979	O. nivara	NA	O. nivara	India	South Asia	21°40'"N	81°50'"E	W6	NA	IRRI	NA	NA	P4	0.9	O. nivara	NA	NA	NA	NA	NA	NA	NA	NA	NA	NA	NA	NA	NA	NA
NID693	IRGC102116	Oryza spp.	NA	O. rufipogon	Cambodia	Southeast Asia	12°18'3"N	104°58'57"E	Admix of W4/ W1	NA	IRRI	NA	NA	P4	0.9	Oryza spp.	I	perennial	0.24	0.0019475	0.0094775	0.229239	0	0.00369333	0.247762	0	0	0.503043	0	0.00483667
NID694	IRGC103306	O. nivara	NA	O. nivara	Taiwan	East Asia	23°36'0"N	120°39'14"E	W1	NA	IRRI	NA	NA	P1	0.5	O. nivara	VIII	annual	0.43	0.00279917	0.00776917	0.419559	0	0.00253833	0.302626	0	0.001785	0	0	0.262923
NID695	IRGC103407	O. nivara	NA	O. nivara	Sri Lanka	South Asia	7°52'37"N	80°42'0"E	Admix of W2/ W1	Or-III	IRRI	NA	NA	P4	0.9	O. nivara	I	perennial	0.31	0.00395667	0.0148492	0.286523	0	0	0.113913	0.56093	0	0	0	0.0198283
NID696	IRGC103415	O. nivara	NA	O. nivara	Sri Lanka	South Asia	8°39'"N	80°30'"E	Admix of W1/ W2	Or-III	IRRI	NA	NA	P1	0.703	O. nivara	VIII	perennial	0.3	0.00395667	0.0119592	0.282045	0	0	0.135128	0.560786	0	0.00413833	0	0.00198833
NID698	IRGC103418	O. nivara	NA	O. nivara	Sri Lanka	South Asia	8°40'"N	80°25'"E	W2	Or-II	IRRI	NA	NA	P4	0.5	O. nivara	VIII	annual	0.02	0	0.01313	0.00776667	0	0	0.0314883	0.937618	0	0.00360583	0	0.00639167
NID701	IRGC103813	Oryza hybr.	NA	O. nivara x O. rufipogon	China	East Asia	NA	NA	Admix of W6/ W5	Or-II	IRRI	DB	CU	P2/P3	0.5	Oryza hybr.	VIII	intermediate	0.43	0.000875	0.0216275	0.395552	0.005805	0.00748667	0.143424	0.000786	0	0.0306925	0.128007	0.265746
NID702	IRGC103814	Oryza hybr.	NA	O. nivara x O. rufipogon	China	East Asia	24°26'46"N	113°1'51"E	Admix of W1/ W6	NA	IRRI	DB	NA	P1	0.899	Oryza hybr.	VIII	perennial	0.34	0.0034975	0.00274583	0.313896	0.01852	0.0036325	0.386002	0	0.00342583	0	0	0.26828
NID703	IRGC103817	Oryza hybr.	NA	O. rufipogon	China	East Asia	NA	NA	W6	Or-II	IRRI	NA	NA	P2/P3	0.95	Oryza hybr.	NA	NA	0.57	0.0112717	0.0013775	0.49463	0.0152917	0.0441475	0.0175458	0	0	0	0	0.415736
NID704	IRGC103818	Oryza hybr.	NA	O. rufipogon	China	East Asia	NA	NA	Admix of W6/ W1	Or-I	IRRI	DB	CU	P1	0.949	Oryza hybr.	I	perennial	0.7	0.00981083	0.0044725	0.644987	0.0167667	0.0203308	0.00588583	0.0133458	0	0.01594	0.00286667	0.265594
NID705	IRGC103822	Oryza hybr.	NA	O. rufipogon	China	East Asia	24°26'46"N	113°1'51"E	W6	NA	IRRI	NA	NA	P1	0.657	Oryza hybr.	VIII	perennial	0.04	0.0040575	0	0.0296825	0.00900333	0	0.0127325	0	0	0.00559833	0	0.938925
NID706	IRGC103825	Oryza hybr.	NA	O. nivara x O. rufipogon	China	East Asia	24°26'46"N	113°1'51"E	W6	Or-III	IRRI	NA	NA	P2/P3	0.65	Oryza hybr.	NA	NA	0.61	0.445052	0.045055	0.034545	0.0342175	0.0464075	0.0284158	0	0	0.0217975	0	0.344508
NID707	IRGC103835	O. nivara	NA	O. nivara	Bangladesh	South Asia	24°25'"N	89°20'"E	W4	Or-I	IRRI	DB	CU	P2/P3	0.95	O. nivara	I	annual	0.49	0.00606833	0.448434	0.0366175	0	0.00166333	0.0662942	0	0	0.427709	0.0051075	0.00810417
NID708	IRGC103836	O. nivara	NA	O. nivara	Bangladesh	South Asia	24°25'"N	89°20'"E	Admix of W4/ W1	Or-I	IRRI	DB	CU	P2/P3	0.9	O. nivara	I	perennial	0.71	0.0120483	0.144194	0.542798	0.00576667	0.000771	0.0759183	0	0	0.216017	0.000672	0.00181417
NID709	IRGC103837	O. nivara	NA	O. nivara	Bangladesh	South Asia	24°25'"N	89°20'"E	W4	Or-I	IRRI	NA	NA	P2/P3	0.95	O. nivara	III	perennial	0.54	0.0409217	0.437372	0.052395	0	0.0046075	0.0591475	0	0	0.396514	0.00134417	0.00769667
NID710	IRGC103840	O. nivara	NA	O. nivara	Bangladesh	South Asia	24°25'"N	89°20'"E	W4	NA	IRRI	DB	NA	P2/P3	0.6	O. nivara	I	annual	0.49	0.0170767	0.438113	0.03809	0	0	0.0484758	0.001585	0	0.449164	0.00134417	0.0061525
NID711	IRGC103841	O. nivara	NA	O. nivara	Bangladesh	South Asia	24°10'"N	89°33'"E	W4	NA	IRRI	DB	CU	P2/P3	0.95	O. nivara	I	perennial	NA	NA	NA	NA	NA	NA	NA	NA	NA	NA	NA	NA
NID712	IRGC103845	O. nivara	O. nivara	O. nivara	India	South Asia	20°28'"N	85°59'"E	W4	NA	IRRI	NA	NA	P4	1	O. nivara	I	perennial	NA	NA	NA	NA	NA	NA	NA	NA	NA	NA	NA	NA
NID713	IRGC104056	Oryza hybr.	NA	O. rufipogon	China	East Asia	NA	NA	Admix of W1/ W6	NA	IRRI	NA	NA	P2/P3	0.9	Oryza hybr.	VIII	intermediate	0.53	0.00453583	0.00462	0.506143	0.00414	0.0147	0.209974	0.00182917	0.00217333	0.00293583	0	0.248947
NID714	IRGC104058	Oryza hybr.	NA	O. rufipogon	China	East Asia	NA	NA	Admix of W1/ W2	NA	IRRI	NA	NA	P4	0.95	Oryza hybr.	I	perennial	0.15	0.00123833	0	0.140687	0.00263417	0.00928167	0.257073	0.460971	0	0.0109917	0	0.117123
NID715	IRGC104497	O. nivara	NA	O. rufipogon	Thailand	Southeast Asia	13°2'22"N	101°29'31"E	Admix of W4/ W1	NA	IRRI	DB	CU	P4	0.799	O. nivara	VIII	perennial	0.42	0.00345667	0	0.419424	0	0	0.0211075	0	0	0.547564	0	0.0084475
NID716	IRGC104647	Oryza hybr.	NA	O. rufipogon	Thailand	Southeast Asia	14°51'"N	100°54'"E	W4	NA	IRRI	DB	CU	P4	0.95	Oryza hybr.	VIII	annual	NA	NA	NA	NA	NA	NA	NA	NA	NA	NA	NA	NA
NID717	IRGC104650	O. nivara	O. nivara	O. nivara	Thailand	Southeast Asia	14°57'"N	100°59'"E	W4	NA	IRRI	DB	CU	P4	0.95	O. nivara	VIII	annual	NA	NA	NA	NA	NA	NA	NA	NA	NA	NA	NA	NA
NID718	IRGC104670	O. nivara	NA	O. nivara	Thailand	Southeast Asia	NA	NA	Admix of W4/ W1	NA	IRRI	NA	NA	P4	0.95	O. nivara	VIII	annual	0.37	0	0.00528083	0.362364	0	0.00735167	0.211802	0	0	0.413202	0	0
NID719	IRGC104687	O. nivara	O. nivara	O. nivara	India	South Asia	25°0'"N	73°0'"E	W5	NA	IRRI	DB	CU	P4	0.95	O. nivara	VIII	intermediate	NA	NA	NA	NA	NA	NA	NA	NA	NA	NA	NA	NA
NID720	IRGC104703	O. nivara	O. nivara	O. nivara	India	South Asia	15°30'"N	73°50'"E	W5	NA	IRRI	DB	CU	P4	0.95	O. nivara	I	perennial	NA	NA	NA	NA	NA	NA	NA	NA	NA	NA	NA	NA
NID721	IRGC104705	O. nivara	NA	O. nivara	India	South Asia	16°20'"N	73°35'"E	W2	NA	NA	DB	CU	NA	NA	O. nivara	III	intermediate	NA	NA	NA	NA	NA	NA	NA	NA	NA	NA	NA	NA
NID722	IRGC104962	Oryza spp.	NA	O. rufipogon	China	East Asia	23°5'26"N	112°58'17"E	W4	NA	IRRI	DB	CU	P4	1	Oryza spp.	I	perennial	0.01	0	0	0.00799917	0	0	0.00188167	0	0	0.990119	0	0
NID723	IRGC104969	O. nivara	O. nivara	O. nivara	China	East Asia	22°57'44"N	113°29'14"E	W4	NA	IRRI	DB	CU	P4	1	O. nivara	VIII	annual	0.01	0	0	0.005175	0	0	0	0	0	0.992943	0	0.00188167
NID724	IRGC104999	O. rufipogon	O. rufipogon	O. rufipogon	Indonesia	Southeast Asia	2°41'26"S	119°1'33"E	W3	Or-III	IRRI	NA	NA	P1	1	O. rufipogon	IV	intermediate	0	0	0	0.00194917	0	0	0.0101075	0	0.987943	0	0	0
NID725	IRGC105319	O. nivara	O. nivara	O. nivara	India	South Asia	10°10'"N	76°10'"E	W2	NA	IRRI	DB	NA	P4	1	O. nivara	I	perennial	NA	NA	NA	NA	NA	NA	NA	NA	NA	NA	NA	NA
NID727	IRGC105391	O. nivara	NA	O. nivara	Thailand	Southeast Asia	15°10'"N	100°0'"E	W4	NA	IRRI	NA	NA	P4	0.8	O. nivara	VIII	annual	0.01	0	0	0.01016	0	0	0.00444417	0	0	0.985395	0	0
NID728	IRGC105397	Oryza hybr.	NA	O. rufipogon	China	East Asia	NA	NA	Admix of W4/ W1	NA	IRRI	NA	NA	P2/P3	0.9	Oryza hybr.	I	intermediate	0.33	0.00931417	0.0257558	0.290304	0.001885	0	0.453022	0	0	0.107073	0.0176675	0.0949775
NID729	IRGC105403	Oryza hybr.	NA	O. rufipogon	China	East Asia	NA	NA	W6	NA	IRRI	NA	NA	P4	0.9	Oryza hybr.	VIII	perennial	0.24	0.00306667	0.000812	0.225471	0	0.00629	0.00610167	0	0	0	0	0.758258
NID731	IRGC105424	O. rufipogon	NA	O. rufipogon	Sri Lanka	South Asia	6°30'"N	80°0'"E	W1	NA	IRRI	NA	NA	P1	1	O. rufipogon	I	perennial	0.29	0.00264667	0	0.287405	0	0	0.669086	0	0	0.009415	0	0.0314475
NID732	IRGC105431	O. nivara	O. nivara	O. nivara	Sri Lanka	South Asia	6°10'"N	81°30'"E	W2	NA	IRRI	NA	NA	P4	0.848	O. nivara	VIII	perennial	0.01	0	0.00738917	0.0016125	0	0.00113917	0.0264258	0.928591	0	0.0320608	0.00278	0
NID733	IRGC105444	O. nivara	O. nivara	O. nivara	Sri Lanka	South Asia	6°10'"N	81°30'"E	W2	NA	IRRI	NA	NA	P4	0.85	O. nivara	VIII	perennial	0.03	0	0.03012	0.00134417	0	0	0.0625058	0.898512	0	0.00418667	0	0.0033325
NID734	IRGC105487	O. rufipogon	NA	O. rufipogon	Thailand	Southeast Asia	17°40'"N	102°50'"E	W1	Or-II	IRRI	NA	NA	P1	0.95	O. rufipogon	VIII	perennial	0.34	0	0	0.336417	0	0.0016125	0.66197	0	0	0	0	0
NID735	IRGC105493	O. rufipogon	O. rufipogon	O. rufipogon	Myanmar	Southeast Asia	20°3'6"N	95°8'19"E	W4	Or-I	IRRI	NA	NA	P4	0.95	O. nivara 7	I	annual	0.02	0	0.00245333	0.0178142	0	0	0.0600275	0	0	0.919707	0	0
NID736	IRGC105494	O. rufipogon	NA	O. rufipogon	Myanmar	Southeast Asia	18°49'0"N	95°13'0"E	W4	Or-I	NA	DB	CU	NA	NA	O. rufipogon	NA	NA	0.11	0	0.0115942	0.0889983	0.00379083	0.00609167	0.0446575	0	0	0.844866	0	0
NID737	IRGC105599	O. nivara	O. nivara	O. nivara	Thailand	Southeast Asia	14°31'41"N	100°54'34"E	W4	Or-I	IRRI	NA	NA	P4	0.95	O. nivara	VIII	annual	NA	NA	NA	NA	NA	NA	NA	NA	NA	NA	NA	NA
NID738	IRGC105601	Oryza spp.	NA	O. rufipogon	Thailand	Southeast Asia	14°31'41"N	100°54'34"E	W4	Or-IOr-I	IRRI	DB	CU	P4	1	Oryza spp.	VIII	annual	NA	NA	NA	NA	NA	NA	NA	NA	NA	NA	NA	NA
NID740	IRGC105622	Oryza hybr.	NA	O. rufipogon	India	South Asia	19°13'"N	82°43'"E	W4	NA	IRRI	NA	NA	P2/P3	0.85	Oryza hybr.	NA	NA	0.37	0.00962167	0.108545	0.251408	0	0	0.00809	0.00131083	0	0.616716	0.00430667	0
NID741	IRGC105624	O. nivara	O. nivara	O. nivara	India	South Asia	20°28'"N	85°59'"E	W4	NA	IRRI	DB	NA	P4	1	O. nivara	I	annual	0.05	0.0210933	0.02771	0.00296583	0	0	0	0	0	0.945788	0.0024425	0
NID742	IRGC105625	O. nivara	NA	O. nivara	India	South Asia	20°9'"N	84°45'"E	W4	Or-I	IRRI	NA	NA	P4	1	O. nivara	VIII	annual	0.42	0.00581667	0.0358042	0.374993	0.00352917	0	0.0130192	0	0	0.556189	0	0.01065
NID743	IRGC105705	O. nivara	O. nivara	O. nivara	Nepal	South Asia	28°10'"N	81°40'"E	W5	NA	IRRI	DB	CU	P4	0.95	O. nivara	VI	NA	NA	NA	NA	NA	NA	NA	NA	NA	NA	NA	NA	NA
NID744	IRGC105716	O. nivara	NA	O. nivara	Cambodia	Southeast Asia	11°25'"N	104°55'"E	Admix of W4/ W1	NA	IRRI	NA	NA	P1	1	O. nivara	I	annual	0.23	0	0.0103008	0.218655	0	0	0.2636	0	0	0.500407	0	0.0070375
NID745	IRGC105738	O. rufipogon	NA	O. rufipogon	Cambodia	Southeast Asia	11°15'"N	104°50'"E	W1	NA	IRRI	NA	NA	P2/P3	0.55	O. rufipogon	VIII	annual	0.67	0	0.00312167	0.642321	0.00352917	0.0160608	0.325791	0	0	0.00669083	0	0.00248667
NID746	IRGC105740	O. nivara	NA	O. nivara	Cambodia	Southeast Asia	11°50'"N	104°40'"E	Admix of W4/ W1	NA	IRRI	DB	CU	P1	0.55	O. nivara	VIII	annual	0.16	0	0.00767	0.148921	0	0.00152167	0.344198	0	0	0.497688	0	0
NID747	IRGC105742	O. nivara	NA	O. nivara	Cambodia	Southeast Asia	12°0'"N	104°40'"E	Admix of W4/ W1	NA	IRRI	NA	NA	P4	0.85	O. nivara	VIII	annual	0.24	0	0.00534833	0.234052	0	0	0.14104	0	0	0.619561	0	0
NID748	IRGC105763	O. nivara	NA	O. nivara	Thailand	Southeast Asia	14°15'"N	102°55'"E	Admix of W4/ W1	NA	IRRI	NA	NA	P4	1	O. nivara	VIII	perennial	0.28	0	0.00146083	0.270629	0	0.00502583	0.123369	0	0	0.591739	0	0.0077775
NID749	IRGC105867	O. nivara	O. nivara	O. nivara	Thailand	Southeast Asia	14°50'"N	101°5'"E	W4	NA	IRRI	NA	NA	P4	0.95	O. nivara	VIII	annual	0.06	0	0	0.0624208	0	0	0.00451	0	0	0.93307	0	0
NID751	IRGC105895	O. nivara	NA	O. nivara	Bangladesh	South Asia	23°0'"N	89°30'"E	W6	NA	IRRI	DB	CU	P1	0.9	O. nivara	I	NA	0.61	0.22467	0.0429442	0.023175	0.114322	0.208885	0.296722	0.0023525	0	0.0111233	0	0.0758092
NID752	IRGC105901	O. rufipogon	NA	O. rufipogon	Bangladesh	South Asia	24°20'"N	91°40'"E	W1	NA	IRRI	NA	NA	P2/P3	0.6	O. rufipogon	I	perennial	0.53	0	0.0242383	0.501077	0	0.00880833	0.459602	0	0	0.00385583	0	0.00241833
NID753	IRGC105960	O. rufipogon	NA	O. rufipogon	Bangladesh	South Asia	21°55'"N	92°5'"E	W1	NA	IRRI	NA	NA	P1	0.95	O. rufipogon	III	perennial	0.39	0.00415	0.0163717	0.365049	0	0	0.564497	0	0	0.020965	0	0.0289667
NID755	IRGC106103	O. rufipogon	O. rufipogon	O. rufipogon	India	South Asia	22°5'"N	87°15'"E	W1	NA	IRRI	NA	NA	P1	1	O. rufipogon	I	perennial	0.02	0.00752	0.00562333	0.00412083	0.0012575	0.0015725	0.966692	0	0	0.00255167	0	0.0106625
NID757	IRGC106148	O. nivara	NA	O. nivara	Laos	Southeast Asia	18°0'"N	102°40'"E	Admix of W4/ W1	NA	IRRI	DB	CU	P4	0.95	O. nivara	I	perennial	0.6	0	0.0083925	0.588392	0	0	0.0972483	0	0	0.303026	0	0.00294083
NID759	IRGC106336	O. rufipogon	NA	O. rufipogon	Cambodia	Southeast Asia	13°21'"N	103°50'"E	W1	NA	IRRI	DB	CU	P1	1	O. rufipogon	VIII	perennial	0.41	0	0	0.408867	0	0	0.563469	0	0	0.00836583	0	0.0192983
NID760	IRGC106345	O. nivara	NA	O. nivara	Myanmar	Southeast Asia	17°10'"N	96°29'"E	Admix of W1/ W5	NA	IRRI	DB	CU	P4	1	O. nivara	I	annual	0.01	0.000752	0	0.00473083	0	0	0.945037	0	0	0	0.0176433	0.0318367
NID762	IRGC106396	O. nivara	NA	O. nivara	Myanmar	Southeast Asia	17°58'"N	95°52'"E	W4	NA	IRRI	DB	CU	P4	0.95	O. nivara	I	perennial	0.28	0.00159583	0	0.269881	0	0.00625	0.0233667	0	0.0131158	0.669463	0	0.0163275
1 National Science Foundation -"Exploring the Genetic Basis of Transgressive Variation in Rice" project accession Identification Number
2 International Rice Germplasm Collection (IRGC) accession number
3 IRRI_GRIN-Global taxonomic designation (https://gringlobal.irri.org/gringlobal/search)
4 Accessions identified as "core" O. rufipogon or O. nivara based on ORSC genomic fractions reported in this study. The 27 accessions with "NA" genomic fractions were used as part of the training set for the RFMix analysis and were selected based ORSC subpopulation assignments reported by Kim et al. (2016).
5 IRGC taxonomy, ORSC subpopulations and chloroplast haplotypes reported in Kim HJ, Jung J, Singh N et al. (2016) Population dynamics among six major groups of the Oryza rufipogon species complex, wild relative of cultivated Asian rice. Rice 9:56.
6 Huang X, Kurata N, Wei X, et al (2012) A map of rice genome variation reveals the origin of cultivated rice. Nature 490:497–501.
7 Corrected species taxonomy based on the phenotypic group and genotypic subpopulation reported in this study. For all eight accessins O. rufpogon was changed to O. nivara.
8 Kim HJ (2016) Genetic characterization of the O. rufipogon Species Complex and construction of interspecific pre-breeding resources for the rice improvement. Doctoral dissertation, Cornell Univ.
9 Genomic fractions of the O. sativa [aromatic, aus, indica, temperate japonica (TEJ) and tropical japonica (TRJ)] and the ORSC (W1-W6) subpopulations based on the RFMix analysis reported in this study. Those with "NA" genomic fractions were used as the training set for the RFMix analysis and selected based on the ORSC subpopulation assignments reported in Kim et al. (2016).
