# Supplementary material for: Phenotypic Variation and the Impact of Admixture in the Oryza rufipogon Species Complex (ORSC)
Source: Front Plant Sci. 2022 Jun 13;13:787703. doi: 10.3389/fpls.2022.787703 (PMC9235872; doi:10.3389/fpls.2022.787703)
Supplement: Supplementary file 3 [file Table_3.xlsx]

## Sheet: SuppTableS3
Supplementary Table 3: Description of the phenotypic traits measured at each location and the acronym used. The list is grouped by growth stage, Planteome acronym (Cooper et al., 2018), trait ontology (TO) or crop ontology (CO) terms, trait description and classification or measurement scale, and location of phenotyping and acronym used at the location. The locations were the International Rice R…
Growth stage	Planteome acronym	TO or CO term	Descriptive trait name	Measurement classification or measurement scale	IRRI acronym (International Rice Research Institute)	DB acronym (Dale Bumpers National Rice Research Center)	CU acronym (Cornell University)
VEGETATIVE GROWTH STAGE
Vegetative	BLSCO	CO_320:0000023	Basal sheath color	green or purple	BLSCO		STEMCOL_BINARY
Vegetative	COLLCOL	CO_320:0000028	Collar color	green/purple	COLLCO
Vegetative	CULMHAB_VEG	TO:0002756	Growth habit	1=erect; 3=semi-erect; 5=decumbent; 7=prostrate	CUHABIT_VEG
Vegetative	LfBladAnth	CO_320:0000250	Leaf blade anthocyanin color	0=absent; 1=present	LBAC
Vegetative	LfBladGreen	CO_320:0000503	Leaf blade intensity of green color	medium vs light/dark green	LBIGC
Vegetative	LFLPUBES	TO:0000055	Leaf blade pubesence on blade surface	hairy upper vs both sides	LBPBS
Vegetative	LIGLG	TO:0000024	Ligule length	Measurement (cm)	LIGLT
Vegetative	RHIFOR	CO_320:0000124	Rhizome and stolon formation	0=No stolons, 1=vegetative crown and stolon	STOLON	STOLON_BINARY	STOLON_BINARY
REPRODUCTIVE STAGE
Reproductive	AWNPLU	TO:0002734	Awn presence	0=Absent, 1=short & partly awned, 5 short & fully awned, 7 long & party awned, 9 long & fully awned		AWNPLU	AWNPLU
Reproductive	AWNPLU_Binary	TO:0002734	Awn presence	no awn vs awn	AWNPR
Reproductive	ANTLT	TO:0000531	Anther length	Measurement (cm)	ANTLT
Reproductive	AWNLG	TO:0000072	Awn length	Measurement (cm)	AWNLT
Reproductive	AWNPLU	TO:0002734	Awn presence	no awn vs awned		AWN_BINARY	AWN_BINARY
Reproductive	AWNWD	TO:0011007	Awn width	Measurement (cm)	AWNWD
Reproductive	CUDI	CO_320:0000155	Culm diameter	Measurement (cm)	CUDI
Reproductive	CULMHAB	TO:0002756	Culm habit	1=erect (<15 deg); 3=semi-erect (intermediate, ~20 deg); 5=open (~40 deg); 7=spreading (>60-80 deg); 9=procumbent	CUHABIT	CULM_ANGLE	CULM_ANGLE
Reproductive	CULT	CO_320:0000030	Culm length	Measurement (cm)	CULT
Reproductive	CUNO	CO_320:0000496	Number of culms per plant	count	CUNO		CUNO
Reproductive	DTHD	TO:0000137	Days to heading	Days from planting (seeding) to first heading date.	DTHD	DTHD	DTHD
Reproductive	FLFLG	TO:0002757	Flag leaf length	Measurement (cm)	FLFLG	FLFLG	FLFLG
Reproductive	FLFLWD	TO:0002758	Flag leaf lamina width	Measurement (cm)	FLFWD	FLFLWD
Reproductive	INFLBRACL	TO:0011004	Panicle branches and axis color	green vs light/dark green;	PANCO
Reproductive	CUKNEE	CO_320:0000064	Culm kneeing ability	no elbow vs elbow	CUKNAB
Reproductive	LFAG	TO:0000206	Flag leaf attitude	1=erect; 3=semi-erect (intermediate); 5=horizontal; 7=descending	FLAGATT
Reproductive	MALEST	TO:0000437	Male sterility	class "0" is fertile (<25% sterile pollen) vs class "1" which is intermediate & male sterile (>95% sterile pollen)	MAST
Reproductive	Pan2ndBr	CO_320:0000034	Panicle secondary branching	0=absent 1=sparse (light) 2=dense (heavy) 3=clustering	PAN2BR
Reproductive	PanAxAtt	CO_320:0000035	Panicle attitude of primary branches	1=upright 2=semi-upright 3=slightly drooping 4=strongly drooping	PAMB
Reproductive	PanBasBrDist	CO_320:0000141	Distance of nearest spikelet to the panicle base	Panicle: DISTANCE OF NEAREST SPIKELET TO PANICLE BASE measure in cm	DIST
Reproductive	PanBrArr	CO_320:0000513	Panicle arrangement of primary branches	whorled vs alternate	PANBR
Reproductive	PANEXS	CO_320:0000074	Panicle exsertion	1=enclosed 3=partly exserted 5=just exserted 7=moderately well exserted 9=well exserted	PANEXS
Reproductive	PANTYP	CO_320:0000018	Panicle type	1=compact 3=semi-compact 5=open 7=horizontal 9=drooping	PANTYPE
Reproductive	PBRNB	TO:0000547	Panicle branch number	Number of primary branches on the main panicle. Post harvest.	PANBASE	PBRNB
Reproductive	PENLFLG	TO:0011005	Penultimate (2nd) leaf length	Measurement (cm)	2LLT
Reproductive	PENLFLWD	TO:0011006	Penultimate (2nd) leaf width	Measurement (cm)	2LWD
Reproductive	PNLG	TO:0000040	Panicle length	Measurement (cm)	PNLG	PNLG	PNLG
Reproductive	PNNB	TO:0000152	Number of panicles per plant	Count (Panicle number per plant)	PNNB	PNNB	PNNB
Reproductive	SPKLG	TO:0002768	Spikelet length	Measurement (mm)	SPKLT
Reproductive	SPKWD	TO:0000564	Spikelet width	Measurement (mm)	SPKWD
Reproductive	STIGLG	TO:0011008	Stigma length	Measurement (mm)	STGLT
Reproductive	STYLLG	TO:0011009	Style length	Measurement (mm)	STYLT
HARVEST GROWTH STAGE
Harvest	FILGRNB	TO:0000447	No. of total seeds	Seed Sample Count		HULGRCO
Harvest	FILGRNB_Bag	TO:0000447	Seed count of single bag panicle	Count (total number of filled spikelets/panicle) [Panicle: Seeds per Panicle]			SEED_S2_BAG
Harvest	FILGRNB_NonBag	TO:0000447	Seed from all remaining panicles that were not bagged	Count			SEED_S2_NONBAG
Harvest	HULCL	TO:0000706	Hull color	straw or black			HULCL
Harvest	HULGRLG	TO:0002761	Seed length	Average length of seed (with hull) from main panicle. Post harvest.		HULGRLG
Harvest	HULGRSURFAR	TO:0002764	Seed surface area	Average whole seed (with hull) surface area as calculated by WinSEEDLE software. Post harvest.		HULGRSURFAR
Harvest	HULGRVOL	TO:0002765	Seed volume	Average whole seed (with hull) volume as calculated by WinSEEDLE software. Post harvest.		HULGRVOL
Harvest	HULGRWD	TO:0002762	Seed width	Average width of seed (with hull) from main panicle. Post harvest.		HULGRWD
Harvest	LIFECYCHAB	TO:0002725	Life cycle	annual vs perennial	LIFE
Harvest	LSEN	CO_320:0000085	Leaf senescence	1=very early 3=early 5=intermediate 7=late 9=very late	LEAF
Harvest	PericCol_Binary	CO_320:0000115	Color of the dehulled grain (pericarp color)	brown or red;			PERICARPCOL_BINARY
Harvest	PTHT	CO_320:0000076	Plant height	Measurement (cm)		PTHT	PTHT
Harvest	SDSH	TO:0000930	Seed shattering	Seed shattering from panicle. 1=Yes, 0=No		SDSH_BINARY	SDSH_BINARY
Harvest	SPKFRT	TO:0000180	Panicle fertility	percent fertility-(no seed/total florets)*100; spikelet fertility or (FILGRNB/TOTAL)*100	FERT
Harvest	STLEMLG	TO:0000240	Sterile lemma length	Measurement (mm)	STLLT
Harvest	STLEMWD	TO:0002727	Sterile lemma width	Measurement (mm)	STLWD
Harvest	UNFILGRNB	TO:0000028	Number of empty spikelets per panicle	Count (Total number of unfilled spikelets per panicle)	UNFILLED	UNFILGRNB
