# Supplementary material for: Phenotypic Variation and the Impact of Admixture in the Oryza rufipogon Species Complex (ORSC)
Source: Front Plant Sci. 2022 Jun 13;13:787703. doi: 10.3389/fpls.2022.787703 (PMC9235872; doi:10.3389/fpls.2022.787703)
Supplement: Supplementary file 4 [file Table_4.xlsx]

## Sheet: TableS4 Legend
	Supplementary Table 4: Summary of the BLUEs for each phenotypic trait that an ORSC accession was phenotyped by location. At the International Rice Research Institute (IRRI), Los Baños, Laguna, Philippines, 222 accessions were phenotyped for 44 traits. (The first 22 traits listed in the table and highlighted in yellow, were measured five times on a single plant.) At the Dale Bumpers National Rice …
	The 22 traits measured five times on a singe plant were: ANTLT, AWNLT, AWNWD , CUDI , CULT, DIST, DTHD, FERT, FLLT, FLWD, 2LLT, 2LWD, LIGLT, PANBASE, PANLT, SPKLT, SPKWD, STGLT, STLLT, STLWD, STYLT and UNFILLED.

## Sheet: List of accessions
NSFTV_ID 1	IRGC_ID 2	IRRI_GRIN_Global_taxonomy 3	Corrected_species 3
NID401	IRGC80433	O. rufipogon	O. rufipogon
NID402	IRGC80539	Oryza hybr.	Oryza hybr.
NID403	IRGC80562	O. rufipogon	O. rufipogon
NID404	IRGC80582	O. nivara	O. nivara
NID405	IRGC80586	Oryza hybr.	Oryza hybr.
NID406	IRGC80592	O. rufipogon	O. rufipogon
NID407	IRGC80742	Oryza hybr.	Oryza hybr.
NID408	IRGC80745	Oryza hybr.	Oryza hybr.
NID410	IRGC80759	O. nivara	O. nivara
NID411	IRGC81801	O. rufipogon	O. rufipogon
NID412	IRGC81802	O. rufipogon	O. rufipogon
NID413	IRGC81850	O. nivara	O. nivara
NID414	IRGC81903	Oryza hybr.	Oryza hybr.
NID415	IRGC81909	Oryza hybr.	Oryza hybr.
NID416	IRGC81970	Oryza spp.	Oryza spp.
NID417	IRGC81976	O. rufipogon	O. rufipogon
NID418	IRGC81977	O. rufipogon	O. rufipogon
NID420	IRGC81984	O. rufipogon	O. rufipogon
NID421	IRGC81990	O. rufipogon	O. rufipogon
NID422	IRGC81993	O. rufipogon	O. rufipogon
NID424	IRGC81996	O. rufipogon	O. rufipogon
NID425	IRGC82040	O. rufipogon	O. rufipogon
NID426	IRGC82979	O. rufipogon	O. rufipogon
NID427	IRGC82988	O. rufipogon	O. rufipogon
NID428	IRGC82989	Oryza hybr.	Oryza hybr.
NID429	IRGC82990	O. rufipogon	O. rufipogon
NID430	IRGC82991	O. rufipogon	O. rufipogon
NID431	IRGC82992	O. rufipogon	O. rufipogon
NID432	IRGC83794	O. rufipogon	O. rufipogon
NID433	IRGC83795	O. rufipogon	O. rufipogon
NID434	IRGC83823	O. rufipogon	O. rufipogon
NID435	IRGC86448	O. rufipogon	O. rufipogon
NID436	IRGC86454	O. rufipogon	O. rufipogon
NID437	IRGC86475	O. rufipogon	O. rufipogon
NID438	IRGC86476	O. rufipogon	O. rufipogon
NID439	IRGC86486	O. rufipogon	O. rufipogon
NID440	IRGC88787	O. rufipogon	O. rufipogon
NID441	IRGC92605	O. rufipogon	O. rufipogon
NID442	IRGC93181	O. nivara	O. nivara
NID443	IRGC93183	O. nivara	O. nivara
NID444	IRGC93188	O. nivara	O. nivara
NID445	IRGC93189	O. nivara	O. nivara
NID446	IRGC93224	Oryza hybr.	Oryza hybr.
NID447	IRGC93274	O. rufipogon	O. rufipogon
NID448	IRGC100189	Oryza spp.	Oryza spp.
NID449	IRGC100195	O. nivara	O. nivara
NID450	IRGC100916	Oryza hybr.	Oryza hybr.
NID451	IRGC101508	O. nivara	O. nivara
NID452	IRGC103308	Oryza hybr.	Oryza hybr.
NID453	IRGC103404	O. rufipogon	O. rufipogon
NID454	IRGC103821	O. nivara	O. nivara
NID455	IRGC103823	Oryza spp.	Oryza spp.
NID456	IRGC103824	O. nivara	O. nivara
NID457	IRGC103838	O. nivara	O. nivara
NID458	IRGC103844	O. rufipogon	O. rufipogon
NID459	IRGC103847	O. rufipogon	O. rufipogon
NID460	IRGC103848	O. rufipogon	O. rufipogon
NID461	IRGC104057	O. rufipogon	O. rufipogon
NID462	IRGC104501	O. rufipogon	O. rufipogon
NID463	IRGC104599	O. rufipogon	O. nivara 3
NID464	IRGC104602	O. rufipogon	O. rufipogon
NID465	IRGC104620	Oryza hybr.	Oryza hybr.
NID466	IRGC104621	Oryza hybr.	Oryza hybr.
NID467	IRGC104624	O. rufipogon	O. rufipogon
NID468	IRGC104626	Oryza hybr.	Oryza hybr.
NID469	IRGC104628	Oryza hybr.	Oryza hybr.
NID470	IRGC104632	Oryza hybr.	Oryza hybr.
NID471	IRGC104634	Oryza spp.	Oryza spp.
NID472	IRGC104636	Oryza hybr.	Oryza hybr.
NID473	IRGC104644	O. nivara	O. nivara
NID474	IRGC104714	O. rufipogon	O. rufipogon
NID475	IRGC104823	O. nivara	O. nivara
NID476	IRGC104959	Oryza hybr.	Oryza hybr.
NID477	IRGC104967	Oryza spp.	Oryza spp.
NID480	IRGC105250	O. rufipogon	O. rufipogon
NID481	IRGC105343	O. nivara	O. nivara
NID482	IRGC105349	O. rufipogon	O. nivara 3
NID483	IRGC105375	O. rufipogon	O. rufipogon
NID484	IRGC105388	O. rufipogon	O. rufipogon
NID485	IRGC105400	O. rufipogon	O. rufipogon
NID486	IRGC105402	O. rufipogon	O. rufipogon
NID487	IRGC105428	O. nivara	O. nivara
NID488	IRGC105491	Oryza spp.	Oryza spp.
NID490	IRGC105567	O. rufipogon	O. rufipogon
NID491	IRGC105568	O. rufipogon	O. nivara 3
NID492	IRGC105569	O. rufipogon	O. nivara 3
NID493	IRGC105706	O. nivara	O. nivara
NID494	IRGC105711	O. rufipogon	O. rufipogon
NID495	IRGC105717	O. nivara	O. nivara
NID496	IRGC105720	O. rufipogon	O. rufipogon
NID497	IRGC105726	O. rufipogon	O. rufipogon
NID498	IRGC105735	O. rufipogon	O. rufipogon
NID499	IRGC105767	O. rufipogon	O. rufipogon
NID500	IRGC105785	O. nivara	O. nivara
NID501	IRGC105821	O. nivara	O. nivara
NID503	IRGC105843	O. rufipogon	O. rufipogon
NID504	IRGC105847	O. rufipogon	O. rufipogon
NID505	IRGC105855	O. rufipogon	O. rufipogon
NID506	IRGC105879	O. nivara	O. nivara
NID507	IRGC105881	O. rufipogon	O. rufipogon
NID508	IRGC105890	O. rufipogon	O. rufipogon
NID509	IRGC105897	O. rufipogon	O. rufipogon
NID510	IRGC105898	O. rufipogon	O. rufipogon
NID511	IRGC105909	O. rufipogon	O. rufipogon
NID512	IRGC105942	O. rufipogon	O. rufipogon
NID513	IRGC105951	O. rufipogon	O. rufipogon
NID514	IRGC105956	O. rufipogon	O. rufipogon
NID515	IRGC105958	O. rufipogon	O. rufipogon
NID516	IRGC106036	O. rufipogon	O. rufipogon
NID517	IRGC106057	O. rufipogon	O. rufipogon
NID518	IRGC106078	O. rufipogon	O. rufipogon
NID519	IRGC106115	O. rufipogon	O. rufipogon
NID520	IRGC106144	O. rufipogon	O. rufipogon
NID521	IRGC106145	O. rufipogon	O. rufipogon
NID522	IRGC106150	O. rufipogon	O. rufipogon
NID523	IRGC106155	O. nivara	O. nivara
NID524	IRGC106156	O. rufipogon	O. rufipogon
NID525	IRGC106161	O. rufipogon	O. rufipogon
NID526	IRGC106163	O. rufipogon	O. rufipogon
NID528	IRGC106168	O. rufipogon	O. rufipogon
NID529	IRGC106169	O. rufipogon	O. rufipogon
NID530	IRGC106273	O. rufipogon	O. rufipogon
NID531	IRGC106283	O. rufipogon	O. rufipogon
NID533	IRGC106327	O. rufipogon	O. rufipogon
NID535	IRGC106342	O. rufipogon	O. rufipogon
NID536	IRGC106357	O. rufipogon	O. rufipogon
NID538	IRGC106410	O. rufipogon	O. rufipogon
NID539	IRGC106412	O. rufipogon	O. rufipogon
NID540	IRGC106413	O. rufipogon	O. rufipogon
NID541	IRGC106414	O. rufipogon	O. rufipogon
NID542	IRGC106415	O. rufipogon	O. rufipogon
NID543	IRGC106420	O. rufipogon	O. rufipogon
NID544	IRGC106452	O. rufipogon	O. rufipogon
NID545	IRGC106453	O. rufipogon	O. rufipogon
NID546	IRGC106509	O. rufipogon	O. rufipogon
NID549	IRGC81881	O. rufipogon	O. rufipogon
NID550	IRGC81887	O. rufipogon	O. rufipogon
NID551	IRGC100596	Oryza spp.	Oryza spp.
NID552	IRGC100920	Oryza hybr.	Oryza hybr.
NID553	IRGC100926	Oryza hybr.	Oryza hybr.
NID555	IRGC105349	O. rufipogon	O. rufipogon
NID556	IRGC105494	O. rufipogon	O. nivara 3
NID557	IRGC105567	O. rufipogon	O. rufipogon
NID558	IRGC105616	O. rufipogon	O. nivara 3
NID559	IRGC105618	Oryza spp.	Oryza spp.
NID568	IRGC106263	O. rufipogon	O. rufipogon
NID592	IRGC80671	O. rufipogon	O. rufipogon
NID599	IRGC100183	Oryza spp.	Oryza spp.
NID600	IRGC100187	Oryza spp.	Oryza spp.
NID602	IRGC100900	O. nivara	O. nivara
NID604	IRGC100907	Oryza hybr.	Oryza hybr.
NID605	IRGC100911	Oryza spp.	Oryza spp.
NID607	IRGC102178	O. nivara	O. nivara
NID655	IRGC100898	O. nivara	O. nivara
NID657	IRGC104705	O. nivara	O. nivara
NID660	IRGC82993	O. rufipogon	O. rufipogon
NID661	IRGC99554	Oryza hybr.	Oryza hybr.
NID662	IRGC99555	Oryza hybr.	Oryza hybr.
NID663	IRGC99556	Oryza hybr.	Oryza hybr.
NID665	IRGC100203	Oryza spp.	Oryza spp.
NID666	IRGC100211	O. rufipogon	O. nivara 3
NID668	IRGC100588	Oryza hybr.	Oryza hybr.
NID669	IRGC100593	O. nivara	O. nivara
NID670	IRGC100597	Oryza spp.	Oryza spp.
NID671	IRGC100599	Oryza hybr.	Oryza hybr.
NID672	IRGC100639	Oryza spp.	Oryza spp.
NID673	IRGC100647	Oryza spp.	Oryza spp.
NID674	IRGC100657	O. rufipogon	O. rufipogon
NID675	IRGC100678	Oryza spp.	Oryza spp.
NID676	IRGC100692	O. rufipogon	O. rufipogon
NID677	IRGC100897	O. nivara	O. nivara
NID681	IRGC100903	O. nivara	O. nivara
NID682	IRGC100904	Oryza hybr.	Oryza hybr.
NID683	IRGC100918	O. nivara	O. nivara
NID685	IRGC100923	O. rufipogon	O. rufipogon
NID686	IRGC100926	Oryza hybr.	Oryza hybr.
NID687	IRGC101193	Oryza hybr.	Oryza hybr.
NID688	IRGC101450	O. nivara	O. nivara
NID690	IRGC101942	Oryza hybr.	Oryza hybr.
NID691	IRGC101967	O. nivara	O. nivara
NID692	IRGC101979	O. nivara	O. nivara
NID693	IRGC102116	Oryza spp.	Oryza spp.
NID694	IRGC103306	O. nivara	O. nivara
NID695	IRGC103407	O. nivara	O. nivara
NID696	IRGC103415	O. nivara	O. nivara
NID698	IRGC103418	O. nivara	O. nivara
NID701	IRGC103813	Oryza hybr.	Oryza hybr.
NID702	IRGC103814	Oryza hybr.	Oryza hybr.
NID703	IRGC103817	Oryza hybr.	Oryza hybr.
NID704	IRGC103818	Oryza hybr.	Oryza hybr.
NID705	IRGC103822	Oryza hybr.	Oryza hybr.
NID706	IRGC103825	Oryza hybr.	Oryza hybr.
NID707	IRGC103835	O. nivara	O. nivara
NID708	IRGC103836	O. nivara	O. nivara
NID709	IRGC103837	O. nivara	O. nivara
NID710	IRGC103840	O. nivara	O. nivara
NID711	IRGC103841	O. nivara	O. nivara
NID712	IRGC103845	O. nivara	O. nivara
NID713	IRGC104056	Oryza hybr.	Oryza hybr.
NID714	IRGC104058	Oryza hybr.	Oryza hybr.
NID715	IRGC104497	O. nivara	O. nivara
NID716	IRGC104647	Oryza hybr.	Oryza hybr.
NID717	IRGC104650	O. nivara	O. nivara
NID718	IRGC104670	O. nivara	O. nivara
NID719	IRGC104687	O. nivara	O. nivara
NID720	IRGC104703	O. nivara	O. nivara
NID721	IRGC104705	O. nivara	O. nivara
NID722	IRGC104962	Oryza spp.	Oryza spp.
NID723	IRGC104969	O. nivara	O. nivara
NID724	IRGC104999	O. rufipogon	O. rufipogon
NID725	IRGC105319	O. nivara	O. nivara
NID727	IRGC105391	O. nivara	O. nivara
NID728	IRGC105397	Oryza hybr.	Oryza hybr.
NID729	IRGC105403	Oryza hybr.	Oryza hybr.
NID731	IRGC105424	O. rufipogon	O. rufipogon
NID732	IRGC105431	O. nivara	O. nivara
NID733	IRGC105444	O. nivara	O. nivara
NID734	IRGC105487	O. rufipogon	O. rufipogon
NID735	IRGC105493	O. rufipogon	O. nivara 3
NID736	IRGC105494	O. rufipogon	O. rufipogon
NID737	IRGC105599	O. nivara	O. nivara
NID738	IRGC105601	Oryza spp.	Oryza spp.
NID740	IRGC105622	Oryza hybr.	Oryza hybr.
NID741	IRGC105624	O. nivara	O. nivara
NID742	IRGC105625	O. nivara	O. nivara
NID743	IRGC105705	O. nivara	O. nivara
NID744	IRGC105716	O. nivara	O. nivara
NID745	IRGC105738	O. rufipogon	O. rufipogon
NID746	IRGC105740	O. nivara	O. nivara
NID747	IRGC105742	O. nivara	O. nivara
NID748	IRGC105763	O. nivara	O. nivara
NID749	IRGC105867	O. nivara	O. nivara
NID751	IRGC105895	O. nivara	O. nivara
NID752	IRGC105901	O. rufipogon	O. rufipogon
NID753	IRGC105960	O. rufipogon	O. rufipogon
NID755	IRGC106103	O. rufipogon	O. rufipogon
NID757	IRGC106148	O. nivara	O. nivara
NID759	IRGC106336	O. rufipogon	O. rufipogon
NID760	IRGC106345	O. nivara	O. nivara
NID762	IRGC106396	O. nivara	O. nivara
1 National Science Foundation -"Exploring the Genetic Basis of Transgressive Variation in Rice" project accession Identification Number
2 International Rice Germplasm Collection Identification Number
3 Corrected species taxonomy based on the phenotypic group and genotypic subpopulation reported in this study. For all eight accessins O. rufpogon was changed to O. nivara.

## Sheet: Trait acronyms
Planteome acronym	Descriptive trait name	IRRI acronym (International Rice Research Institute)	CU acronym (Cornell University)	DB acronym (Dale Bumpers National Rice Research Center)
ANTLT	Anther length	ANTLT
AWNLG	Awn length	AWNLT
AWNPLU	Awn presence		AWNPLU	AWNPLU
AWNPLU	Awn presence		AWN_BINARY	AWN_BINARY
AWNPLU_Binary	Awn presence	AWNPR
AWNWD	Awn width	AWNWD
BLSCO	Basal sheath color	BLSCO	STEMCOL_BINARY
COLLCOL	Collar color	COLLCO
CUDI	Culm diameter	CUDI
CUKNEE	Culm kneeing ability	CUKNAB
CULMHAB	Culm habit	CUHABIT	CULM_ANGLE	CULM_ANGLE
CULMHAB_VEG	Growth habit	CUHABIT_VEG
CULT	Culm length	CULT
CUNO	Number of culms per plant	CUNO	CUNO
DTHD	Days to 50% heading	DTHD	DTHD	DTHD
FILGRNB	No. of total seeds			HULGRCO
FILGRNB_Bag	Seed count of single bag panicle		SEED_S2_BAG
FILGRNB_NonBag	Seed from all remaining panicles that were not bagged		SEED_S2_NONBAG
FLFLG	Flag leaf length	FLFLG	FLFLG	FLFLG
FLFLWD	Flag leaf lamina width	FLFWD		FLFLWD
HULCL	Hull color		HULCL
HULGRLG	Seed length			HULGRLG
HULGRSURFAR	Seed surface area			HULGRSURFAR
HULGRVOL	Seed volume			HULGRVOL
HULGRWD	Seed width			HULGRWD
INFLBRACL	Panicle branches and axis color	PANCO
LFAG	Flag leaf attitude	FLAGATT
LfBladAnth	Leaf blade anthocyanin color	LBAC
LfBladGreen	Leaf blade intensity of green color	LBIGC
LFLPUBES	Leaf blade pubesence on blade surface	LBPBS
LIFECYCHAB	Life cycle	LIFE
LIGLG	Ligule length	LIGLT
LSEN	Leaf senescence	LEAF
MALEST	Male sterility	MAST
Pan2ndBr	Panicle secondary branching	PAN2BR
PanAxAtt	Panicle attitude of primary branches	PAMB
PanBasBrDist	Distance of nearest spikelet to the panicle base	DIST
PanBrArr	Panicle arrangement of primary branches	PANBR
PANEXS	Panicle exsertion	PANEXS
PANTYP	Panicle type	PANTYPE
PBRNB	Panicle branch number	PANBASE		PBRNB
PENLFLG	Penultimate (2nd) leaf length	2LLT
PENLFLWD	Penultimate (2nd) leaf width	2LWD
PericCol_Binary	Color of the dehulled grain (pericarp color)		PERICARPCOL_BINARY
PNLG	Panicle length	PNLG	PNLG	PNLG
PNNB	Number of panicles per plant	PNNB	PNNB	PNNB
PTHT	Plant height		PTHT	PTHT
RHIFOR	Rhizome and stolon formation	STOLON	STOLON_BINARY	STOLON_BINARY
SDSH	Seed shattering		SDSH_BINARY	SDSH_BINARY
SPKFRT	Panicle fertility	FERT
SPKLG	Spikelet length	SPKLT
SPKWD	Spikelet width	SPKWD
STIGLG	Stigma length	STGLT
STLEMLG	Sterile lemma length	STLLT
STLEMWD	Sterile lemma width	STLWD
STYLLG	Style length	STYLT
UNFILGRNB	Number of empty spikelets per panicle	UNFILLED		UNFILGRNB

## Sheet: IRRI (BLUES)
NSFTV_ID	FLFLG	FLFWD	LIGLT	2LLT	2LWD	PANBASE	PNLG	DIST	CULT	DTHD	CUDI	AWNLT	AWNWD	SPKLT	SPKWD	STLLT	STLWD	STGLT	STYLT	ANTLT	UNFILLED	FERT	PNNB	CUNO	AWNPR	BLSCO	COLLCO	CUHABIT_VEG	CUHABIT	CUKNAB	FLAGATT	LBAC	LBIGC	LBPBS	LEAF	LIFE	MAST	PAMB	PAN2BR	PANBR	PANCO	PANEXS	PANTYPE	STOLON
NID401	32.5245	1.14667	18.5513	47.5852	1.0965	1.02514	23.7489	2.90452	129.01	97.9321	4.1537	75.2447	0.34778	9.11599	2.92522	2.51167	0.667752	1.93189	0.576757	3.46852	5.83622	0.02294	77.3831	98.3936	1.95981	81.6064	71.0288	4.26199	5.87986	0.0163757	5.94795	0.468789	60.0521	1.9811	1.70614	1.48048	1.00711	1.09476	0.142305	1.92534	60.0311	7.77077	4.41898	0.0595656
NID402	37.0366	1.4034	16.8971	58.8729	1.27139	1.02719	24.6132	2.44032	124.669	100.747	5.16548	68.7187	0.365528	8.38401	3.02276	2.17839	0.710549	1.96169	0.590045	2.29931	6.47812	0.854173	90.0082	98.1796	1.94158	80.7226	71.0833	3.8666	3.92758	0.0489899	1.9944	0.495994	60.088	2.55737	3.46882	2.23685	1.06364	1.10616	0.946208	1.87207	60.3287	6.94584	3.77667	0.664453
NID403	24.5475	1.04472	20.9587	40.8866	1.09487	1.0921	24.7658	3.65587	155.574	130.459	4.25975	55.1034	0.331033	8.69184	2.47061	1.98551	0.643077	2.40461	0.526255	5.73528	4.72681	0.444329	94.3208	94.0992	1.58271	76.6853	73.9605	4.24571	4.36613	0.646934	3.30679	0.608493	60.0739	1.99843	1.64536	1.86132	1.05785	1.04105	0.211534	1.87023	60.1175	7.68487	4.29295	0.708813
NID404	30.2746	1.5257	18.2521	52.2103	1.3176	1.09402	24.2868	1.6273	141.079	113.36	6.03147	57.7779	0.325637	8.76888	3.09608	2.6448	0.697354	2.02037	0.574442	2.57583	4.57418	1.79365	88.924	93.9307	1.76429	73.0807	68.685	3.40807	4.14041	0.143575	2.4298	0.547698	60.005	2.08644	3.21871	2.53617	0.998005	1.08216	0.865668	1.36359	60.011	8.46078	4.11612	0.704697
NID405	31.7156	1.38524	16.8509	51.8577	1.01657	0.99188	24.0733	1.8832	120.472	114.42	4.04276	104.105	0.445981	8.92443	2.94709	2.58271	0.596136	2.05867	0.56284	2.18752	2.93428	2.06319	76.0776	85.6981	1.97343	82.0515	64.0373	4.1268	7.30261	0.814655	4.59838	0.886911	61.1751	2.00717	5.28094	2.1879	1.0015	1.05736	0.181999	1.93802	60.0969	7.73853	5.23993	0.444455
NID406	27.2095	1.17452	17.404	39.9364	1.13845	1.25356	19.6194	3.24656	125.315	113.044	4.18455	64.5473	0.327456	7.66312	2.46802	2.06528	0.58564	2.04468	0.54188	4.98395	5.45133	-0.791204	91.5256	100.271	1.91832	80.3965	69.4794	3.91423	5.19785	0.0140734	4.71724	0.603069	59.9594	2.14261	3.80287	1.91544	1.07356	1.2214	0.323612	1.83197	60.0394	6.40035	4.2416	0.46821
NID407	25.3981	1.45942	19.756	46.7289	1.44006	1.80046	23.8391	2.85946	182.004	146.375	5.86693	19.4099	0.295684	8.20264	3.02281	2.18214	0.518951	2.06296	0.52262	4.23258	5.18946	0.852383	88.452	91.7502	1.63887	73.4127	72.5264	4.92457	5.50722	0.506487	5.37196	0.519063	60.0339	2.06751	2.85568	2.12241	1.0085	1.51004	0.468923	1.94489	61.6602	8.50932	4.1335	0.838193
NID408	31.8293	1.18053	26.9215	55.8295	1.29025	1.01365	24.2769	4.02302	170.631	120.294	5.62823	86.8099	0.299856	9.11568	2.76498	2.1565	0.840136	1.81007	0.562992	3.85687	5.77823	0.0399136	81.711	86.1779	1.39924	79.3596	74.9437	3.36087	3.61779	0.0518705	3.02447	0.774341	60.4369	2.0893	1.77337	1.35662	0.996311	1.64962	1.5171	1.19797	60.6373	6.94924	2.87593	0.265635
NID411	25.8588	1.29391	25.3004	50.8777	1.35481	1.20994	25.7835	4.59465	180.304	140.682	5.08137	64.0339	0.353604	8.29998	2.48468	2.52448	0.750688	2.07967	0.578422	5.46663	4.6343	0.639436	95.4063	98.5458	1.93185	80.175	76.7312	4.17535	4.3668	0.442775	3.68236	0.799853	60.0816	2.35334	1.76374	1.41583	1.07897	1.14278	0.719033	1.42748	60.1809	7.35158	6.00347	0.199819
NID412	27.9738	1.4741	25.0596	53.4909	1.44538	1.0521	22.1712	3.49516	205.502	153.977	5.56724	53.5458	0.30359	8.35445	2.46137	2.14612	0.708936	2.07883	0.637091	5.57286	5.33145	-0.659461	92.4956	104.909	1.9217	79.9541	74.4996	3.78158	3.63681	0.0275569	3.05082	0.58504	59.9817	2.04066	3.81783	2.28015	1.54596	1.3212	0.878922	1.29467	60.1729	8.54987	4.21431	0.852329
NID413	26.4931	1.23508	17.9312	48.3573	0.973556	1.05996	20.0026	2.65704	98.2041	96.0417	4.65486	74.7249	0.424601	8.56227	3.18986	2.37392	0.536081	1.82564	0.473438	2.06306	3.84743	1.33819	88.1417	95.475	1.9408	79.5219	67.7716	4.12787	5.63892	0.00143903	4.29558	0.680369	60.0881	2.02421	3.00935	1.67414	1.09964	1.14609	0.257718	1.84575	60.3322	8.72083	5.74763	0.368568
NID414	40.5386	1.61985	20.8961	58.4456	1.37146	1.01763	25.1088	1.7783	118.705	99.3285	5.36533	26.3834	0.317285	7.61972	3.07354	2.18474	0.446459	1.2891	0.372237	2.38614	9.63308	0.196647	83.9564	100.725	1.96014	80.9187	72.4952	4.2771	5.14662	0.0313038	4.02073	0.890535	59.9567	2.03294	3.70856	2.6963	1.41914	1.29318	0.20196	1.92841	60.1137	7.22448	3.23582	0.855977
NID415	31.3529	1.44823	19.7934	53.3349	1.19996	1.14209	21.2293	2.95407	112.577	102.416	5.13724	72.1356	0.386542	8.73077	3.20762	2.61997	0.639609	1.92953	0.553081	2.00463	5.61269	0.535279	79.245	83.5391	2.05248	69.2144	65.5486	4.14967	5.18104	0.0426992	3.4861	0.712221	60.0024	2.11656	2.24446	1.34646	1.57875	1.4377	0.463597	1.55473	60.1214	6.58747	3.92028	0.451613
NID416	32.8948	1.26233	22.0616	56.1852	1.20755	1.0245	28.0997	3.05207	182.74	141.041	6.69139	21.9212	0.165154	9.69768	3.17965	2.69587	0.860611	1.49223	0.591598	3.02124	6.60158	0.548701	86.1301	89.8296	2.00001	74.1669	68.0841	4.06769	5.00864	0.0752295	3.73039	0.331528	59.9454	2.11896	3.69793	2.02534	0.982239	1.55148	0.472081	1.71273	61.4308	7.64242	3.99351	0.573064
NID417	27.6798	1.25462	26.7015	53.6748	1.30005	1.99317	27.0185	5.46591	165.552	145.644	5.97447	78.9626	0.314808	8.35689	2.19721	2.09473	0.702019	2.14894	0.637902	5.90801	6.38886	-0.917074	83.1281	92.7426	1.92924	79.6524	75.4475	3.87189	4.35553	0.0174183	3.86805	0.789407	60.7056	2.06263	3.62709	2.43617	1.00614	1.10236	0.852682	1.42378	60.2998	8.40278	5.09424	0.77569
NID418	30.1336	1.23016	25.5261	54.6443	1.2517	2.46825	27.0612	4.26019	176.647	139.939	4.87408	82.0982	0.298982	8.40204	2.14239	1.59714	0.621851	2.60193	0.534387	6.49309	5.8732	-0.464409	79.2058	92.1393	1.47092	77.0892	69.8097	4.47434	5.04368	0.118337	3.81555	0.214687	61.6541	1.94833	2.88279	1.63275	1.03529	1.51178	0.92352	1.92534	61.7508	8.56183	3.46494	0.335719
NID420	29.2747	1.13105	17.2725	49.8366	1.0497	1.03867	26.3641	4.19638	170.633	120.127	5.0439	78.3848	0.359213	8.28391	2.51431	1.95976	0.606253	1.96034	0.46671	4.67166	4.84486	0.551449	88.2732	92.2883	1.99595	81.0649	66.4033	3.45904	5.0693	0.112642	2.82909	0.764609	60.0135	2.0315	1.84341	1.3491	1.31333	1.18497	0.361784	1.73164	60.1288	7.80149	4.76111	0.157012
NID421	23.0537	1.22143	20.3851	42.2795	1.26135	1.07843	24.9758	3.65351	165.648	135.106	5.32261	95.9546	0.306542	8.84503	2.46991	2.11209	0.742512	1.74306	0.587494	5.73748	2.95891	1.85982	91.0283	86.3153	1.0834	69.2758	65.9629	3.58916	3.24508	0.221274	3.52715	0.349674	60.0809	2.14588	4.52908	2.11823	1.0452	0.958086	1.33674	1.31725	60.6835	6.9652	3.42143	0.50134
NID422	28.8287	1.37459	22.4547	53.7435	1.35342	1.77406	25.3013	4.01805	160.3	136.395	5.69165	86.3119	0.270171	9.21922	2.65082	2.7463	0.761064	2.33302	0.615502	5.51594	5.44767	0.454987	85.693	92.0798	1.9381	79.1639	72.0576	3.72793	4.37617	0.0552662	4.22953	0.556275	60.0825	3.3377	2.74272	1.81784	1.53259	1.10607	1.10527	1.65366	60.2408	7.87428	5.38593	0.604446
NID424	27.5135	1.34272	22.4287	47.6642	1.31506	1.10669	26.6257	2.35999	188.791	126.608	6.09642	87.4655	0.318285	9.45325	2.7649	2.04826	0.720657	2.36638	0.616371	5.84595	4.30939	0.960037	96.8244	88.7973	1.91804	76.803	67.1014	3.97322	5.35992	0.529911	3.89236	0.436046	60.053	1.98944	3.16498	1.91481	1.61581	1.00413	0.940445	1.83345	60.1091	7.97945	3.86327	0.565946
NID425	25.6439	1.25702	21.2732	48.6149	1.25006	1.59355	25.1205	2.91555	152.934	134.849	4.75216	73.7482	0.33804	8.92556	2.55919	2.06109	0.751352	2.09611	0.577897	4.58069	6.5953	-0.628645	92.7473	92.3447	1.95658	75.9296	65.3016	4.33169	4.66528	0.0832632	3.65893	0.213441	60.0817	2.04646	2.07279	1.41192	1.11044	1.55915	0.475371	1.85871	60.2038	6.86799	4.86562	0.241845
NID426	28.7953	1.29302	22.0653	51.31	1.00003	1.09816	25.2607	3.22513	115.981	120.997	4.44357	96.705	0.423397	8.65238	2.54754	2.47652	0.824523	1.93928	0.576787	4.19885	5.31042	0.440401	74.0909	82.3227	1.96216	82.0772	65.7063	4.35873	6.44065	0.466271	4.79924	0.908731	60.0711	2.05789	2.44917	1.94194	1.06913	1.08306	0.259896	1.97957	60.4886	8.12071	6.441	0.76599
NID427	32.1159	1.15838	19.5909	52.329	1.13808	1.14862	22.8351	3.6996	152.212	127.295	5.51745	77.1504	0.361808	9.13541	2.8425	2.48851	0.837188	2.04172	0.604476	4.89634	5.43675	-0.692993	87.5585	94.29	1.95571	80.2235	70.2497	3.91235	4.62246	0.0223093	5.41297	0.521568	60.0824	2.03388	5.22006	2.67502	1.04228	1.17934	0.723326	1.39955	60.1235	7.94317	4.16227	0.54295
NID428	37.276	1.34156	23.5309	53.5307	1.07517	1.01649	25.9545	2.67216	139.791	105.845	5.47843	75.9778	0.462088	8.60039	3.06294	2.21449	0.592503	2.41805	0.609861	3.49873	8.28674	-1.77634	80.9156	87.6158	2.0238	81.6518	70.3496	3.56065	4.74748	0.409779	2.65216	0.942439	60.0072	1.95634	2.25401	2.08633	1.00124	1.01071	0.838079	1.19003	59.9234	7.08054	3.47584	0.456359
NID429	26.5366	1.05937	18.7978	45.8936	1.04474	1.36855	25.3042	3.3821	152.694	125.077	4.325	68.4085	0.321523	8.46082	2.39397	2.08019	0.748918	1.93106	0.592375	4.56569	5.97004	-0.857312	83.7836	89.2718	1.89554	75.4281	71.1969	3.50116	5.85159	-0.0297006	3.08317	0.22171	60.0317	2.01281	2.08809	1.18236	1.16439	1.38201	0.418052	1.86335	60.0988	5.92065	3.90376	0.135908
NID430	23.7256	0.987794	13.9669	36.833	0.854983	1.0122	20.5736	2.99364	109.392	103.954	3.81716	84.4334	0.349537	9.17363	2.80071	2.61057	0.692197	2.00794	0.582319	4.35914	4.30804	-1.22661	87.0556	94.3038	1.94446	79.7321	64.3978	4.15148	6.32179	0.359606	3.94865	0.414046	60.1013	1.99647	2.48055	1.82087	1.05786	1.75819	0.621916	1.86523	60.0654	8.48046	5.41714	0.504122
NID431	32.7225	1.22001	23.8965	47.299	1.10504	1.19893	24.3743	3.38111	137.994	105.949	4.61617	81.4046	0.334551	8.93649	2.91851	2.47605	0.750761	1.72127	0.648639	3.79935	4.85071	0.0538307	84.5981	86.0987	1.54733	80.7326	74.0808	4.03801	3.87978	0.0413497	3.64319	0.850922	60.0317	1.98656	3.69744	2.01819	1.44851	1.37542	0.907294	1.52602	60.8665	8.55022	4.69045	0.548396
NID432	26.8202	1.10084	19.3562	42.6625	1.04177	1.2118	25.3049	3.33773	145.736	118.262	4.80227	69.618	0.301638	8.48217	2.05687	2.87387	0.823801	2.00281	0.577731	5.73458	3.33713	0.909239	86.2598	97.5443	1.9803	71.4577	65.3563	3.60878	4.11811	0.0802105	3.59424	0.40992	59.9866	2.04952	1.82263	1.47017	1.0266	1.65223	0.77447	1.32085	60.0123	7.29028	3.68176	0.29051
NID433	25.0799	1.18317	28.3027	48.7555	1.14912	1.45495	23.2589	3.73499	163.197	135.733	5.26082	71.8185	0.347795	8.24367	2.61453	1.9446	0.603444	2.20973	0.513312	3.53038	4.61267	0.858559	85.5601	88.9526	1.44972	76.4124	66.1897	4.31835	3.80609	0.580623	2.17047	0.674788	60.1062	2.04275	2.05442	1.27546	1.04731	1.15078	0.535712	1.56878	60.2166	7.67739	4.27599	0.409179
NID434	24.3879	1.67864	22.4019	43.6781	1.70982	0.992596	23.3631	4.77618	188.209	133.301	6.25955	63.6941	0.30603	8.42105	2.64917	2.21264	0.804781	1.84519	0.557639	5.52707	4.59258	-0.322668	84.2987	91.0892	1.99872	80.5089	75.8507	4.27905	4.6148	0.0124532	5.01601	0.450492	60.0266	2.02568	2.19175	2.44717	1.06038	2.05258	0.579475	1.95667	60.1313	8.13836	4.02937	0.768199
NID435	29.8466	1.35932	24.3511	56.943	1.35838	1.64285	28.7801	3.74557	165.689	122.498	5.82431	80.3528	0.292089	9.44619	2.58737	2.78168	0.763026	1.83816	0.714925	4.2054	7.98262	-1.01767	88.0235	98.9946	1.96113	80.3203	66.0071	3.44007	4.86947	0.00425726	3.53202	0.903591	60.0209	2.58962	3.36211	2.22315	0.998346	1.13714	1.24482	1.4108	60.664	7.78052	5.70308	0.629391
NID436	29.3868	1.37299	31.3362	48.8311	1.29274	1.04394	25.1031	5.11945	180.768	137.675	6.23182	74.567	0.348588	8.17776	2.44281	2.27423	0.85005	2.09639	0.606804	5.17289	5.21281	-0.225727	87.1459	92.5304	1.94128	79.5809	72.4752	4.42212	4.74641	0.0451048	2.97927	0.891448	60.0343	2.00413	2.40091	2.15864	1.51941	1.18354	0.624619	1.8478	60.1451	7.50086	4.3118	0.535837
NID437	25.4274	0.960302	18.8934	43.9786	0.93914	1.22345	23.1277	3.52704	169.242	119.944	4.39913	53.0896	0.301643	7.55044	2.11777	1.69346	0.640652	2.08788	0.466926	4.42604	6.47032	-0.168972	105.354	108.408	1.31569	78.4041	75.0521	3.84707	4.10381	0.035687	3.28439	0.84242	60.0627	1.94403	2.71817	1.59016	1.06918	1.16362	0.604941	1.77408	60.074	8.30747	4.83838	0.35126
NID438	31.0582	1.34211	31.7371	54.7668	1.23886	1.19141	23.4429	3.28897	139.781	104.93	5.29148	71.5187	0.326418	8.53552	2.85957	2.66494	0.728213	2.24049	0.551569	3.71026	6.8165	0.15302	77.026	87.336	1.9882	82.1158	70.7921	4.56482	5.16014	0.418261	4.75908	0.913978	60.3813	2.00512	3.32802	2.16296	0.994697	1.07624	0.167453	1.60379	60.4582	8.25054	5.43346	0.764951
NID439	24.7955	1.18384	22.5185	43.6451	1.17042	1.05144	23.9992	3.53208	174.939	140.457	5.56224	80.6158	0.302932	8.76439	2.4918	2.52729	0.656801	2.35013	0.592014	4.97485	5.75308	-0.128521	82.3885	84.2499	2.06005	70.0055	64.8841	3.91217	4.83526	0.140716	3.73745	0.368301	60.0138	2.0711	2.19623	1.26902	1.02755	1.78591	0.831663	1.19784	60.3575	5.43002	4.6418	0.171022
NID440	23.8766	1.09742	22.1211	48.4458	1.16562	1.10192	27.1084	4.8491	166.878	135.193	5.84917	68.6458	0.298372	9.1199	2.50865	2.28618	0.690676	2.04885	0.557634	4.48416	6.34721	-2.01405	80.8945	84.7462	2.04116	81.4587	66.048	4.06749	6.08751	0.0523138	3.3859	0.300006	60.5675	2.06612	3.32123	1.81222	1.5549	1.17488	0.827947	2.02077	60.1072	5.99434	3.57065	0.445174
NID441	30.2828	1.47864	20.762	49.1226	1.45744	1.98782	26.0202	3.44231	172.829	136.106	5.50784	63.4913	0.309132	8.46721	2.44634	2.06532	0.760739	2.39533	0.534536	5.83031	5.44232	0.173412	85.4419	94.4682	1.93368	69.3573	66.4853	4.15576	3.05611	0.135519	2.22916	0.329633	60.112	2.03989	1.8667	1.26488	1.0021	1.10069	1.06877	1.12061	60.5886	8.37419	2.51856	0.132428
NID442	27.1882	1.26981	13.3282	39.2131	0.913882	0.992065	15.3986	1.42565	83.3157	100.411	3.63021	80.056	0.395573	8.6475	3.22346	2.8401	0.687316	2.07173	0.525108	1.76301	2.38434	2.55606	77.8911	81.8043	1.96539	77.4687	63.7416	4.02522	4.98035	0.362422	5.48499	0.698052	61.7416	2.29734	2.32891	1.57101	1.01471	1.38963	0.906786	1.99307	60.0591	8.38994	5.81037	0.0244764
NID443	30.3935	1.13127	13.2709	45.8136	0.934651	1.18283	17.1895	1.61781	91.3859	102.31	3.39595	76.0947	0.382409	8.95843	3.11487	2.64687	0.631603	1.9556	0.567714	2.16751	2.94966	1.65291	84.701	90.5739	1.99831	79.7641	76.1189	3.97564	4.32958	0.0100738	3.94746	0.795693	60.4219	2.79748	2.22197	1.8847	0.986044	1.06874	1.03115	1.53227	60.5629	8.10303	6.23587	0.849828
NID444	26.869	1.13172	15.6282	40.8587	0.934214	1.01582	16.4116	1.20009	80.9026	96.8123	3.1427	79.783	0.380536	8.81637	3.27325	2.91105	0.563361	1.86028	0.530166	1.8002	2.39169	2.64386	88.4412	91.3065	1.96586	73.2911	63.6189	3.875	4.4291	0.0693635	4.46509	0.551739	60.2427	2.87643	3.82501	1.97936	0.935671	1.13142	1.36913	1.4791	60.1206	6.85434	4.07926	0.530813
NID445	29.2879	1.23192	11.528	44.4161	0.874883	1.01767	15.0644	1.17586	74.0211	92.7636	3.58073	75.8983	0.390548	8.77101	3.25449	2.84005	0.707513	1.86055	0.541303	2.04659	2.10244	2.80497	89.3599	94.4291	1.92911	73.2853	63.4292	3.80398	4.4983	0.0436468	4.19448	0.523454	60.4137	2.12196	3.88823	1.8256	1.43222	1.9436	1.00124	1.88477	61.627	6.2709	4.14183	0.580847
NID446	30.1939	1.31937	17.3227	46.6843	1.01398	1.10049	20.3966	2.70128	121.805	104.076	4.11238	61.875	0.348106	8.38944	3.03772	2.46282	0.580949	1.96033	0.588345	2.02242	4.62637	1.26335	86.7542	95.6896	1.615	74.0898	71.168	3.02774	4.52413	0.0254774	3.96248	0.593548	60.022	2.06184	2.12773	1.9158	1.05472	1.48154	0.907173	1.52499	60.0942	7.97275	3.65188	0.156133
NID447	26.0801	1.02631	21.1841	47.0512	0.957732	1.29531	24.9034	4.03817	152.487	119.568	5.14593	70.1895	0.367146	8.61714	2.46095	1.90444	0.670251	2.34044	0.604703	5.12005	6.60869	-0.488254	84.9128	97.1603	1.95166	81.4034	70.4456	3.7716	4.60921	0.0489694	4.78529	0.864703	60.0388	1.97793	3.07659	2.48252	1.047	1.03218	0.323846	1.94978	60.8341	8.43827	6.51621	0.612849
NID448	27.5417	1.19253	16.8313	43.3137	0.948354	1.04315	21.1512	1.21061	163.059	110.628	3.66544	63.1611	0.329403	8.00593	2.44742	1.79156	0.431906	1.51566	0.385793	3.12526	5.0922	0.748539	88.7326	94.2751	1.97955	74.6661	68.8269	4.44727	4.5494	0.153454	2.7882	0.580096	59.911	2.06702	3.45585	1.87692	0.98679	1.42485	0.583936	1.6317	60.131	8.66069	4.14517	0.510279
NID449	31.1258	1.23212	14.2784	45.5847	1.11019	1.14566	20.9537	1.55855	115.884	98.3835	3.84025	79.5826	0.310873	8.07385	2.48853	2.24016	0.581928	1.59575	0.629084	1.7964	5.08743	0.882033	80.1278	94.9181	1.9683	78.9173	67.7172	3.79813	5.24171	0.1632	4.71085	0.925743	60.0377	3.24043	5.21072	2.3699	0.986052	1.37074	0.967185	1.97535	60.2022	8.42667	4.5915	0.71987
NID450	25.5954	1.25514	17.1966	45.4876	1.12467	1.09985	18.713	1.83917	106.878	99.2371	3.84181	79.1703	0.38984	9.41073	2.83837	2.49792	0.534623	1.92402	0.527234	2.92283	4.50018	0.439111	81.4916	86.4787	1.99608	81.4084	65.1871	4.12446	4.66927	0.0522405	3.96739	0.919813	60.0127	2.74942	4.4753	2.67509	1.0056	1.01142	0.538834	1.96779	61.6137	8.71297	5.62574	0.888881
NID451	30.619	1.32034	12.9399	51.747	0.926809	1.05979	19.9079	1.96651	83.1704	95.5301	4.00244	78.214	0.462298	9.38023	3.12958	2.50748	0.601146	1.99011	0.540204	2.14618	5.24743	0.731671	82.4759	88.6728	1.97324	81.8231	67.0497	4.24445	3.7917	0.0270623	3.38077	0.920053	60.5133	2.03696	2.07256	1.5046	1.0865	1.05587	0.777177	1.96441	60.3038	8.3497	7.78532	0.876689
NID453	32.0842	1.25195	18.57	50.0674	1.11766	1.01465	21.8363	2.34468	116.547	102.574	4.63408	68.5704	0.342862	9.09858	2.86133	2.44253	0.739306	1.47419	0.511248	3.17801	6.22816	0.447044	80.6174	84.9901	1.99606	75.8961	75.8362	4.35011	3.9873	0.0534891	3.67037	0.629641	59.9455	2.74789	3.55068	1.94624	1.00257	1.3589	0.460368	1.59478	61.2379	8.39834	4.94746	0.903481
NID454	38.2952	1.56301	21.1163	50.6104	1.25572	1.00878	25.0343	2.68506	127.157	103.932	5.36699	47.5779	0.297314	7.61305	2.46064	1.82202	0.786205	1.97727	0.714342	3.05521	6.43084	0.814996	83.8601	96.6244	1.92818	78.6093	71.5656	4.30743	5.47546	0.325082	5.29664	0.930005	59.9635	2.01216	2.71539	2.41472	1.06605	1.55889	0.972281	1.08582	60.4695	7.9755	4.17061	0.857899
NID455	32.3557	1.11317	23.6226	52.9401	1.04545	1.05446	23.152	4.51962	146.612	109.893	4.28977	77.3177	0.336912	8.6981	2.66772	1.97645	0.806939	1.43925	0.452541	5.01953	5.98349	-0.753703	75.187	99.636	1.94267	82.3054	74.0798	4.31498	5.15182	0.00600056	2.90583	0.868922	60.4262	1.98418	2.64835	2.00795	0.980723	1.51752	0.515664	1.90494	60.4389	7.60422	4.81764	0.77375
NID456	29.0316	1.57395	19.8916	50.6725	1.3786	0.976749	22.0616	2.18218	136.932	108.383	5.4716	39.1485	0.354993	8.08037	3.37489	2.45034	0.697684	1.88308	0.495629	2.81319	7.41375	-0.596083	85.569	90.8686	2.00415	79.4609	67.0566	4.59519	4.01855	0.292108	4.6438	0.669904	60.0278	2.84078	3.45707	2.21384	1.02878	1.72391	0.881893	1.51312	60.084	6.12011	5.44565	0.783186
NID457	29.8171	1.47432	27.9088	48.0042	1.44492	0.960367	25.3662	3.54546	178.019	122.321	6.12959	51.3958	0.328849	7.44797	3.01849	2.20873	0.790611	2.11575	0.586479	3.0094	4.81321	1.19483	86.9857	88.6498	1.53336	72.2076	66.6595	3.27018	3.62429	0.176613	3.34136	0.394	60.7599	2.00276	2.56587	1.51729	1.29747	2.75276	1.47569	1.25998	59.9431	7.14966	3.71924	0.0681887
NID458	33.1817	1.53388	20.7404	54.7395	1.37393	1.39292	22.1929	3.35376	131.87	112.324	5.3327	48.9407	0.294919	8.64681	2.52061	2.17867	0.71592	1.84239	0.585977	4.2574	5.52811	0.415766	87.9721	94.3954	1.95043	79.2131	75.7889	4.08315	4.39173	-0.0231396	4.1155	0.552048	59.9787	3.42191	2.75382	1.93628	1.03196	1.55921	1.27322	1.91772	60.864	7.11104	2.82766	0.484846
NID459	23.9094	1.02467	21.1152	35.508	1.12611	1.03061	23.5312	3.39571	131.796	118.538	3.48637	75.5737	0.314905	8.22626	2.32924	2.26452	0.771755	2.04162	0.627072	5.60333	3.75438	0.365252	85.4868	88.1054	1.57354	79.2113	76.1164	4.12244	4.51889	0.0503718	4.94318	0.399152	61.1966	1.60875	2.13985	1.18498	1.11937	1.38182	0.495464	1.99158	60.031	8.64999	4.06316	0.467004
NID460	26.7615	1.28425	19.7861	41.7206	1.23088	1.48322	20.6057	2.2912	135.425	117.779	5.33489	80.7152	0.326196	8.81157	2.64014	2.32432	0.798381	1.92636	0.575429	3.92187	5.88917	0.13366	80.6902	82.9334	1.78119	68.2887	64.0679	3.99136	5.02541	0.0641392	5.31418	0.301117	59.9859	2.04808	2.56938	1.18493	1.00887	1.26608	1.03315	1.12474	60.7078	7.4734	4.44671	0.145515
NID461	34.5762	1.33966	23.6606	51.5694	1.02942	1.05637	25.6604	4.07837	138.442	106.769	4.82986	53.62	0.313326	8.9638	2.70878	2.60789	0.718966	2.00718	0.568346	4.20062	6.82017	0.318578	91.8908	95.9941	1.5825	76.1954	76.3809	3.93965	4.3219	0.618175	4.2875	0.726773	60.0184	2.01353	2.64529	1.72304	1.05934	1.67129	0.974396	1.68356	60.6298	8.34441	5.40779	0.203253
NID462	27.8642	1.23693	28.1566	54.764	1.15112	1.439	24.4447	4.24546	157.062	106.064	5.47476	73.4546	0.341068	8.29623	2.74011	2.34664	0.505212	1.98083	0.51183	4.53105	8.64643	-1.11442	87.3352	99.0637	1.95802	81.6298	72.8123	4.42599	5.05568	0.0368424	3.19144	0.458015	60.0315	1.96427	1.79227	1.7498	1.0657	1.09893	0.259914	1.89893	60.1586	8.65841	5.79353	0.4704
NID463	24.2717	0.881805	21.2691	43.428	0.816376	1.09829	15.7911	1.43277	106.365	130.021	4.05878	87.2552	0.357183	9.25744	2.99622	2.42885	0.600726	1.92081	0.547972	4.07082	2.43797	0.976694	84.2778	89.2708	1.91449	79.9476	64.2696	4.17737	4.95741	0.473928	3.76441	0.451514	61.2564	2.10718	2.1354	1.75919	1.06022	1.18306	0.70257	1.8987	60.2854	7.69718	4.44825	0.555535
NID464	28.335	1.19147	21.899	49.3975	1.12544	1.44673	22.129	3.10887	147.069	133.823	4.50954	68.4753	0.297227	8.00032	2.45907	1.87219	0.572654	2.1334	0.531382	5.63235	5.15265	0.51491	92.7679	95.4904	1.6042	78.4067	70.346	3.60219	4.10742	0.0859895	4.726	0.428195	60.0867	2.04863	2.77765	2.16095	1.07981	1.56847	1.4475	1.85321	61.4086	7.57051	3.65686	0.615446
NID465	33.7296	1.3795	23.4719	52.305	1.07129	1.49176	25.591	2.61043	148.027	106.404	4.36607	83.3312	0.303221	8.79524	2.86161	2.47367	0.664905	2.30588	0.609201	3.74014	7.93765	-0.29757	85.3536	90.1236	1.93742	77.5256	72.6574	4.2099	5.01764	0.263414	3.81314	0.692438	60.0435	2.03362	3.75613	2.0819	1.02526	1.04043	0.399925	1.89474	60.0807	7.64213	2.82733	0.951421
NID466	36.5832	0.984763	25.9955	59.3559	0.867764	1.03055	27.7348	5.04711	152.775	109.765	4.34711	47.4684	0.317159	8.55951	2.71655	2.23213	0.633179	2.09284	0.547261	4.3836	6.79662	-0.540397	90.2729	100.324	1.96075	81.039	77.8702	4.27381	4.108	0.0437711	1.55026	0.904417	60.0456	2.02499	2.29748	2.5422	1.01971	1.39361	0.994219	1.90579	60.1019	7.84966	2.18108	0.610638
NID467	38.1495	1.10617	18.8461	59.2574	0.882131	1.03601	27.8032	3.38732	151.178	113.136	4.7071	58.9638	0.328637	8.97283	2.79448	2.40708	0.715823	2.1656	0.604398	4.48329	6.54286	-0.498655	86.3137	95.405	1.97798	79.9112	72.3247	4.03008	3.8762	0.0727073	2.23476	0.660112	60.0285	2.04118	2.5097	2.00806	1.00035	1.12538	1.11864	1.91417	60.571	6.51537	2.85469	0.62664
NID468	37.3501	1.0856	22.7832	55.491	0.847489	1.07942	23.7325	2.3646	133.699	102.995	3.47493	50.0682	0.35947	8.8391	2.77346	2.37677	0.78865	1.82104	0.541971	4.32674	4.84935	0.670082	92.2059	96.1702	1.95242	79.6582	65.6089	4.21098	2.85711	0.0914374	2.1251	0.208743	60.033	2.02451	2.20425	1.3188	1.04315	1.21409	0.704847	1.61908	60.3768	7.73628	2.85514	0.154542
NID469	34.4381	0.975332	20.7889	58.7117	0.797822	1.04241	25.897	3.05096	140.754	100.87	4.52279	56.4283	0.322073	8.03493	2.55868	1.97291	0.545413	1.91778	0.391175	3.95097	8.00978	-0.521577	87.6276	95.5469	1.96761	81.677	68.9845	4.81027	4.51907	0.628457	3.53673	0.894946	60.0123	2.00655	5.95902	2.60467	1.01144	1.44593	0.917913	1.33549	60.6659	8.52357	5.74823	0.868338
NID470	28.9933	1.09789	20.3454	51.0545	0.937408	1.07348	28.9598	4.38163	149.722	111.267	4.71322	72.5492	0.329002	9.0159	3.01772	2.44459	0.729724	2.17351	0.604972	4.97945	7.00308	-1.61678	82.8632	90.1091	1.99487	74.6844	67.7387	4.63838	4.64228	0.575084	3.2384	0.336178	60.061	2.04143	3.19597	2.16876	1.05929	1.61836	1.47434	1.72029	60.5437	8.21226	3.7552	0.862379
NID471	36.0601	1.69151	20.2187	53.2146	1.31273	1.52283	21.5008	2.25434	93.0054	97.5475	5.04802	46.0025	0.337349	8.45928	2.97553	2.21554	0.608412	1.47278	0.45657	3.65667	6.18282	1.18479	78.8612	80.2742	0.526962	69.1176	64.9236	3.83638	3.57686	0.130592	3.36238	0.381673	60.0216	2.07823	3.20104	1.13823	1.57286	2.27551	0.741108	1.97742	60.8124	8.45743	3.49431	0.0873177
NID472	30.7959	0.965318	16.1538	45.3887	0.799708	1.17949	22.557	2.32181	98.0489	96.2466	3.6506	23.9656	0.289081	8.44962	2.74687	2.12145	0.639938	1.99695	0.5422	3.94272	5.0488	1.05863	83.552	92.3824	1.58894	74.9258	71.829	4.2127	5.33337	0.449294	3.91559	0.56441	60.0193	2.04307	2.69261	1.8424	1.01169	1.81513	0.803423	2.00557	60.9509	8.54485	6.22425	0.84485
NID473	35.5431	1.20654	18.247	62.4156	1.14476	1.09805	23.5929	3.7578	127.078	107.472	4.73176	109.911	0.427011	8.60441	3.04451	2.31035	0.651171	1.99846	0.599309	3.02515	4.48904	0.606806	80.8817	87.1947	1.98357	82.2213	71.2729	4.77507	5.60493	0.775692	4.85541	0.898338	61.0758	2.06902	2.7148	1.89389	1.01348	1.0368	0.994209	1.54575	60.5684	8.48352	6.24105	0.882186
NID474	28.9817	1.36634	29.421	53.8236	1.34589	1.08241	25.8448	5.56284	176.354	136.045	5.858	98.979	0.329758	8.85897	2.43742	2.32744	0.674502	2.21799	0.546784	5.20162	4.17701	0.603534	84.7776	88.0367	1.98468	73.3857	66.3104	4.12664	5.42501	0.65067	2.36502	0.556161	60.0589	2.08189	2.45648	1.64396	1.06057	1.02398	0.977119	1.22944	60.2127	6.49103	4.69738	0.423126
NID475	33.5326	1.14396	23.1949	58.932	1.105	1.05736	24.3815	3.49102	164.98	118.45	5.50644	100.634	0.437515	8.06534	2.84111	1.99638	0.651234	1.74329	0.522972	3.72785	5.07288	1.33846	84.5842	90.0391	1.97078	81.6083	69.9889	4.06494	4.51314	0.0889136	4.0533	0.858748	60.0841	2.05722	2.44768	1.33429	1.0405	1.57493	0.925466	1.84839	60.1231	7.8579	4.25634	0.187285
NID476	30.0155	1.41642	22.0977	45.1859	1.28602	1.41218	23.2888	4.25076	149.863	119.31	4.74017	69.148	0.32421	8.89391	2.56556	2.16819	0.661964	2.35304	0.591265	5.4358	5.67806	0.0236721	90.876	92.099	1.91303	72.7261	69.1412	3.84993	3.6494	0.119391	1.79078	0.53376	60.0059	2.01863	3.5445	2.318	1.50197	1.04898	0.699681	1.05805	60.7997	8.74448	3.33433	0.709698
NID477	32.1622	1.12912	20.0677	53.0859	1.09164	1.01043	27.0304	2.96512	161.624	119.198	6.28039	44.4732	0.354823	8.6664	2.9083	2.32579	0.665641	1.60694	0.508866	3.12528	6.53836	0.801237	89.8832	93.3461	1.9773	79.7057	77.3687	4.82174	6.3783	0.422477	5.22091	0.822546	59.9787	2.02792	3.59319	2.46237	1.0265	1.75123	0.485599	1.97402	61.1116	8.47258	5.12708	0.910737
NID480	23.7498	1.43421	22.3546	48.3366	1.38469	1.15597	24.3577	3.74423	163.808	128.796	5.0833	93.5306	0.358721	8.87739	2.43791	2.1344	0.745741	2.1589	0.675626	5.97306	5.10477	0.00346037	92.1571	95.21	1.63235	80.5927	65.5611	4.0034	2.76096	0.0570019	2.8404	0.5703	60.1238	2.00868	2.43872	1.83753	1.06643	1.09434	0.629952	1.85096	60.453	7.54213	4.4852	0.517353
NID481	37.714	1.65577	18.8076	57.6966	1.4584	1.08926	23.8502	1.58835	107.769	96.5968	4.8622	68.995	0.340373	9.22678	3.04092	2.8759	0.783036	1.45483	0.519697	3.13293	5.74761	0.924312	80.1673	84.8786	1.38876	79.965	70.8959	3.46256	3.54627	0.0693927	3.80376	0.911981	59.9997	2.14521	4.50795	1.76601	1.30262	1.07377	0.865908	1.19977	60.4748	7.3904	3.77002	0.392857
NID482	35.0244	1.35973	15.6193	51.7803	1.23723	1.08916	21.3681	1.23536	122.516	98.0345	4.58844	64.1102	0.313727	8.97324	2.842	2.5463	0.672341	1.6063	0.513904	3.44384	5.19454	0.993123	79.6473	89.6264	1.96427	81.427	71.2112	4.45375	5.17124	0.41938	5.62028	0.547053	59.9915	2.10629	3.93224	1.78502	0.984169	1.06105	0.532871	1.55282	60.6039	6.95161	4.93884	0.528088
NID483	31.5499	1.36786	23.5782	56.8245	1.3954	0.999452	27.7254	3.27511	174.293	114.945	5.63456	75.2149	0.366461	7.8464	2.67652	2.15242	0.684434	1.8836	0.526048	3.68283	6.51273	-0.222259	84.718	91.6068	2.03933	80.1918	73.7398	4.28453	4.20109	0.0830117	2.84472	0.946741	59.9733	2.86126	4.25953	2.11657	0.981499	0.976805	1.07313	1.48338	60.4996	7.40799	4.89667	0.846757
NID484	29.1188	1.2968	26.5822	48.0765	1.20305	1.14105	23.247	3.69072	149.312	135.799	4.74166	71.4258	0.310432	9.17195	2.62025	2.11659	0.732691	1.60596	0.586791	4.22927	4.59213	-0.0106345	85.9022	86.4359	1.91832	77.238	71.776	4.16334	5.16034	0.0685018	5.21236	0.642329	59.9923	2.03963	4.88596	2.41168	1.49035	2.06017	0.498652	1.67864	61.7742	8.46079	6.32647	0.882185
NID485	34.2703	1.07666	31.2449	53.5339	0.981566	1.08703	21.9083	4.23775	159.845	111.622	4.83703	74.4474	0.337913	9.22592	2.67055	2.32551	0.682982	2.22724	0.578111	4.65201	6.65303	-1.84504	82.6911	86.4327	2.01445	75.8999	69.9042	3.86074	5.2526	0.0580243	3.02726	0.685335	59.9796	2.03128	4.33678	1.80535	1.00259	1.15205	0.852718	1.10183	60.4229	7.042	2.99524	0.237403
NID486	40.4383	1.04579	30.2549	58.8706	0.893742	1.23055	24.6944	2.97222	148.914	103.855	4.31502	64.2136	0.302066	9.58052	2.49188	2.20588	0.731077	2.36256	0.54657	4.98005	5.41717	0.408255	85.1499	89.6304	1.97673	80.9614	67.8582	3.5407	3.68676	0.0719357	4.52344	0.840947	59.9752	2.01435	2.10784	1.29955	1.02403	1.93555	0.866379	1.24692	60.5457	7.53269	2.84563	0.0726477
NID487	25.5554	1.09427	22.4768	52.8344	1.18165	1.00059	21.1226	2.51166	122.739	109.826	5.42256	112.462	0.348124	9.12182	2.96965	2.37665	0.713013	1.78623	0.617226	3.49626	3.45091	1.24162	75.9825	76.5846	2.05321	75.6155	68.564	4.4158	3.92199	0.0945743	4.93261	0.612209	60.1202	2.69963	4.85612	1.81327	1.43197	0.948917	1.21676	1.71757	60.4992	7.77523	3.24563	0.486978
NID488	36.8615	1.47325	15.8147	54.1046	0.995704	0.97736	24.405	2.25058	128.647	104.491	5.00248	50.7508	0.315526	8.00485	2.98518	2.11411	0.520116	1.33577	0.430628	2.55466	5.06383	1.66664	86.0887	90.5368	1.99245	81.3692	76.1495	3.77302	3.6324	0.0889007	3.28572	0.529993	59.9576	2.03469	2.30604	2.04381	1.00302	1.76776	1.04778	1.55492	60.0791	6.41641	4.25827	0.534961
NID490	26.5965	1.26592	23.7769	43.0408	1.17904	1.07015	24.0809	2.90452	169.799	133.784	5.54043	77.7777	0.36471	8.97774	2.52958	2.97574	0.787589	2.30655	0.574565	4.94279	4.66444	0.240538	87.7078	89.4721	1.99964	72.9167	65.6785	4.25023	6.22493	0.283089	2.84677	0.497192	60.2166	2.03283	2.75277	2.57279	1.07174	1.11672	0.273174	1.84744	60.4222	7.4209	4.82228	0.402535
NID491	28.5129	1.09453	28.1208	52.2718	0.927348	1.14622	19.1222	2.27767	135.454	111.121	4.78394	101.011	0.385006	9.08245	2.80806	2.97828	0.732121	1.79357	0.587092	3.79526	3.51525	1.41147	87.9802	90.6194	1.9569	80.9123	68.8144	4.45939	3.17249	0.0413788	5.07385	0.893549	60.0141	2.09194	4.31393	2.87183	1.28621	1.11754	0.985209	1.89039	60.1894	7.24736	5.36903	0.981151
NID492	31.3452	1.13372	27.7137	57.8753	1.07223	1.21457	20.5262	2.07503	134.969	113.64	5.1818	97.126	0.373395	8.90371	2.88251	2.48939	0.68874	2.05138	0.49021	3.98288	3.52269	1.1949	73.4486	77.2777	2.01306	80.4053	69.6485	4.32467	4.05671	0.110964	4.58683	0.662117	60.0021	2.04883	5.14032	2.31766	1.02143	2.2826	0.507618	1.30847	61.1917	8.1929	5.33454	0.800858
NID493	33.1243	1.4927	14.8557	51.1272	1.10179	1.08039	17.7566	1.45928	82.6034	95.072	4.4603	74.3759	0.407883	9.21727	3.24125	2.66986	0.618489	2.06444	0.534479	2.1135	3.01139	1.9831	83.394	84.5369	1.98608	72.5239	63.6381	3.4299	3.8962	0.0255891	3.63245	0.537841	60.0865	2.09915	3.33238	1.16856	1.04399	1.51511	0.931959	1.40859	60.6159	8.60332	4.16637	0.0940886
NID494	32.9729	1.33002	13.5997	37.5962	1.19706	1.09673	18.1899	2.03753	114.102	101.837	3.97807	55.5272	0.340923	8.60739	2.49348	2.38888	0.62463	1.94551	0.553837	4.23373	4.74045	0.460232	92.6008	95.1826	1.92777	78.7261	76.5294	4.71312	5.19736	0.400597	2.85546	0.850038	59.9981	1.99336	3.04256	1.79789	1.03534	1.03423	0.499305	1.88077	60.4521	8.8938	2.59211	0.522915
NID495	29.3994	0.871124	19.0308	51.3576	0.908763	1.11723	21.422	3.13025	162.205	137.41	4.33194	106.231	0.393543	7.73283	2.59738	1.9338	0.498915	2.03152	0.461399	2.75464	3.31097	1.91007	79.0565	82.6369	2.00113	81.7157	77.1867	4.41517	5.80882	0.10467	4.25856	0.604188	60.0592	2.05358	2.70599	1.5174	0.985891	0.974713	0.957394	1.11632	60.0901	8.04986	3.7893	0.132404
NID496	28.5152	1.16134	20.5179	41.2945	1.11113	1.05757	24.4664	3.64637	197.827	138.687	4.88613	55.5686	0.307064	7.75117	2.31174	1.84959	0.656522	2.07737	0.514444	4.07562	8.77042	-0.907111	91.8752	100.136	1.95867	80.852	66.5944	3.95254	4.23059	0.0432205	2.67154	0.589053	60.0296	1.96989	1.55408	1.36025	1.05664	1.60076	0.959941	1.87071	60.0116	6.59443	5.00894	0.171065
NID497	27.077	0.844411	16.8883	41.265	0.836109	1.41616	21.2102	2.85277	137.259	123.906	4.13443	77.3008	0.303142	8.48499	2.49905	2.06718	0.827876	1.86553	0.613375	4.40226	3.628	1.27137	86.4985	90.705	1.48617	72.7519	65.8167	4.36032	4.62854	0.561479	3.96391	0.266415	60.0987	2.05383	4.68946	1.71083	1.04063	1.15345	0.861287	1.85458	61.5358	7.44025	4.36312	0.88778
NID498	35.8945	1.19362	20.4105	54.634	1.04165	1.17204	24.336	2.7603	131.897	121.571	4.40455	52.9402	0.298828	8.5276	2.43024	1.8889	0.576668	2.14901	0.495872	2.96833	8.31215	-0.456255	79.859	84.4919	2.01373	81.7371	75.7022	3.94217	4.74074	0.0496931	4.69102	0.658068	60.7024	2.09286	3.7771	1.94705	0.967253	1.16683	1.04125	1.76932	60.1391	7.15212	4.55927	0.122837
NID499	34.067	1.348	20.9712	52.7765	1.20862	1.15484	25.667	3.01584	173.857	135.718	5.50631	12.4667	0.162326	9.14857	2.63553	2.13771	0.771679	1.95655	0.582899	3.77758	8.0894	-0.0469219	92.049	96.0981	1.03921	69.9336	69.4853	3.79558	3.46321	0.101443	3.87013	0.382206	59.9472	2.11138	3.58294	2.32857	1.36898	1.26789	0.889556	1.56051	60.6535	8.35373	4.31893	0.850108
NID500	33.6829	1.17861	16.2577	56.5034	0.973474	1.08456	24.8848	2.94421	126.128	105.423	4.54185	77.2485	0.350068	9.35709	2.99816	2.192	0.761944	2.03538	0.6522	2.52525	5.06336	0.298135	86.5589	93.9026	1.66766	73.1899	68.0162	4.58207	4.72592	0.118418	3.50907	0.46352	60.0514	2.08453	4.0697	1.33032	1.03266	2.15797	0.886613	1.85973	60.2108	6.55712	5.65677	0.972231
NID501	26.0165	0.808371	21.3243	49.2225	0.752998	1.04633	21.6578	3.07223	116.324	107.69	3.95011	89.1281	0.338246	8.80313	2.60793	2.34524	0.696404	2.04633	0.605046	2.32875	3.27356	0.801982	93.4328	97.4923	1.92024	80.5888	74.3568	3.92188	4.69067	0.377733	2.89269	0.812731	60.0681	2.08668	3.16502	1.96362	1.02297	1.11752	0.98468	1.56143	60.5268	4.60556	5.08642	0.583637
NID503	29.7128	1.27754	25.4225	54.1933	1.2048	1.1916	26.435	3.2863	151.457	130.856	5.63775	80.9661	0.387359	8.90006	2.83208	2.41548	0.850959	1.89086	0.605608	3.63767	7.27157	-1.33156	77.5739	85.6371	2.01641	81.31	71.3023	4.15949	5.7582	0.0181341	4.12326	0.860073	59.9889	2.05629	1.94594	1.44573	1.03258	1.46951	0.568062	1.231	60.4953	5.79498	4.12307	0.266461
NID504	20.5606	1.09634	14.6533	36.3073	1.10731	1.18545	20.2633	1.94991	189.477	144.905	3.9859	65.6697	0.305886	7.97443	2.40107	2.48314	0.721386	1.79042	0.587318	4.8893	4.60927	-0.29929	92.2308	96.1395	1.99047	74.6071	64.654	4.39998	5.09834	0.0779577	4.14228	0.522527	60.0378	2.01983	2.36323	1.22842	1.00162	1.89164	0.595262	1.94093	60.0539	7.38351	4.931	0.137674
NID505	33.8988	1.24959	22.8573	52.2911	1.12369	1.0321	28.361	3.5364	164.681	137.521	5.205	63.2458	0.309243	8.73907	2.62547	2.31163	0.785937	1.88301	0.57881	4.3136	6.28031	-0.0814874	87.6152	86.5283	1.97977	80.2939	70.9217	4.95911	6.44283	0.424747	4.46899	0.824335	60.021	1.96806	4.42798	2.44392	1.46359	2.15976	0.232617	1.91263	60.183	7.04908	4.71989	0.843287
NID506	36.4352	1.55242	21.7984	60.353	1.4011	1.01376	23.2484	2.40445	150.87	132.394	5.68449	66.8678	0.322402	8.38333	3.02983	2.17425	0.80268	1.61804	0.593805	2.56422	6.78335	0.478332	95.1069	95.51	1.94927	76.407	71.9169	4.3593	3.731	0.335801	2.82604	0.67701	60.0705	2.07491	2.56564	1.41642	1.08504	1.69504	1.26821	1.58873	60.0914	6.00526	4.91721	0.285208
NID507	24.8515	1.27846	27.4388	45.2643	1.24156	1.0391	24.3611	5.05584	164.929	137.504	5.07529	71.7336	0.359103	8.13888	2.30261	1.86286	0.598944	2.03478	0.538454	4.68844	4.73793	0.465238	84.3015	88.8693	1.96866	79.4086	71.6697	4.47465	4.29117	0.0794164	2.46562	0.900432	59.9861	2.03063	4.38056	2.56886	1.02134	1.1052	0.562183	1.16017	61.1069	7.36777	3.21982	0.868497
NID508	27.1093	1.43559	26.0591	53.9862	1.3936	1.1392	24.2159	3.16673	153.806	125.681	5.42142	35.6281	0.159723	9.21062	3.09609	2.48367	0.849818	1.63167	0.64736	3.91907	6.8361	-0.607575	91.8518	94.5578	1.88842	78.1658	73.8942	3.99998	3.76595	0.0226085	3.37467	0.464968	60.0776	2.0745	1.95888	1.43727	1.09745	2.26987	0.94649	1.60832	61.099	6.92919	4.78366	0.301688
NID509	29.4332	1.25604	21.4047	43.3731	1.1968	1.04444	24.0375	4.39741	174.316	120.916	5.34771	67.4238	0.308566	8.22861	2.5136	1.90029	0.617631	2.69972	0.480245	4.18288	4.88794	0.241483	85.0043	92.9206	1.96739	74.8256	71.6401	4.13161	4.53368	0.49387	4.09998	0.59016	60.0374	1.96183	1.61747	1.30887	0.956484	1.07763	0.521181	1.03832	60.0238	6.99572	4.15651	0.543012
NID510	24.288	1.22556	24.6938	39.2052	1.20863	1.60834	19.0782	3.13808	117.437	109.012	4.223	49.3508	0.363367	8.63802	2.53501	2.20739	0.641202	2.18364	0.524747	4.47891	3.53981	-0.574233	86.6389	93.2471	1.95733	80.4068	64.7267	4.37833	4.90957	0.0131371	1.61263	0.85763	60.0605	2.01257	2.07735	1.87075	1.02892	1.21604	0.877087	1.54755	61.5162	8.0227	3.28288	0.46223
NID511	28.438	1.32465	17.0895	51.0567	1.35484	1.22614	28.9576	5.32498	184.72	138.968	5.97621	79.0117	0.299349	9.17764	2.33519	2.1589	0.718094	2.00597	0.629064	6.22395	4.92518	0.0148303	90.9332	99.0199	2.01007	74.6269	71.7654	4.31692	3.86467	0.272704	2.98601	0.61135	60.0356	2.05372	2.078	1.51686	1.06279	1.06587	0.900293	1.18881	60.6523	5.66579	4.5671	0.315777
NID512	25.8999	1.29581	28.8734	58.2538	1.05132	1.90474	26.3467	3.38282	170.575	146.064	6.18864	106.013	0.401669	8.52612	2.57959	2.14445	0.634444	1.99858	0.587737	4.90444	6.82246	-1.55682	81.6493	89.9397	1.59288	77.9617	73.3045	4.52853	5.40406	0.599412	2.5938	0.685786	60.0213	2.10025	2.78259	2.37244	1.04688	1.11161	1.20436	1.34725	61.2503	7.56273	5.06356	0.725573
NID513	24.6346	1.19662	22.5377	48.5817	1.24475	1.02833	24.9952	4.49547	181.103	139.644	5.06288	80.5548	0.304374	8.51581	2.40825	2.31323	0.836251	2.09696	0.564459	5.00785	6.35496	-0.933344	83.0269	90.2431	2.01113	79.4322	71.7966	4.55459	3.83704	0.0595154	4.2631	0.560542	60.0662	2.54156	2.98036	1.78637	1.97052	1.63935	0.928661	1.96406	60.0834	5.31882	2.75236	0.575663
NID514	22.9862	1.03721	17.5945	38.8332	1.00059	1.17743	23.633	3.2278	150.892	136.709	5.36129	83.4326	0.323668	8.77761	2.45582	2.34198	0.851973	2.0347	0.653642	4.4476	6.39434	-0.600938	81.9174	86.936	1.98918	73.8105	65.3487	3.95552	6.9609	0.284685	4.87739	0.505918	59.9971	2.05505	2.03644	1.25548	1.06713	1.53644	0.644691	1.97884	60.3456	6.82553	5.28231	0.399117
NID515	27.0545	1.47731	21.7625	50.9204	1.42706	1.64075	22.2765	2.47013	174.233	137.15	5.56375	69.1446	0.350527	8.36803	2.36811	1.82753	0.58694	2.08869	0.488289	5.97856	6.33017	-0.368185	83.7397	97.3632	1.9507	80.9728	65.6049	4.67695	4.87384	0.138156	4.62224	0.831049	60.0153	2.26186	4.33086	2.57177	1.00866	1.39749	0.382873	1.88251	60.3484	7.45979	4.92469	0.806088
NID516	27.8475	1.39458	14.8897	49.1765	1.32878	1.153	23.3715	2.50826	140.267	119.808	4.7821	7.0265	0.044528	8.4774	3.07725	2.41787	0.663409	2.01726	0.494175	3.50174	8.04805	-0.529869	90.2562	96.5921	1.99057	75.3509	68.3167	4.3993	4.18077	0.108786	3.42505	0.590944	60.1138	2.11025	2.1817	2.59185	1.06041	1.94308	0.942669	1.94621	61.0925	7.69325	5.04252	0.857727
NID517	26.2805	1.03425	19.8256	45.0463	1.0937	1.02498	22.3296	3.35723	151.038	122.71	4.4013	106.228	0.333777	7.81619	2.4293	1.93912	0.591138	1.88796	0.455343	5.10075	3.95505	1.01073	71.7275	84.1798	1.96484	81.9447	76.4773	4.61493	6.44666	0.80401	3.49441	0.490024	60.4583	2.02164	3.31231	2.48123	0.984536	0.997496	0.869439	1.60705	60.4568	8.40239	4.06611	0.799222
NID518	31.8579	1.25488	21.1673	62.7872	1.07963	1.34105	26.78	2.9171	161.466	115.308	4.8765	92.1756	0.339376	8.81398	2.50469	2.18905	0.638743	2.19345	0.450344	3.87239	5.90884	-0.388494	72.3971	86.7276	2.04919	82.7626	66.1555	5.35305	6.61245	0.321679	3.04302	0.709104	60.0821	2.00835	5.23859	1.68012	0.941061	1.09836	0.545823	1.72896	60.3661	7.32489	3.83782	0.75779
NID519	22.8911	1.15594	18.7461	38.1135	1.05612	1.07925	21.8354	3.63663	105.204	115.858	4.43949	74.2724	0.303998	8.30296	2.32204	2.03924	0.780491	1.97185	0.599877	5.03434	4.5732	-0.365595	83.0933	92.1614	1.87151	79.4436	69.0119	4.55411	6.12845	0.661147	4.87149	0.749229	60.103	2.02751	3.25277	2.58441	1.09834	1.12482	0.741555	1.64901	60.8112	7.70187	4.7812	0.830333
NID520	28.6456	1.23681	24.1438	46.6722	1.1581	1.02081	23.7184	3.52143	154.533	120.998	4.8798	77.9454	0.331432	8.88887	2.892	2.43275	0.748347	2.0208	0.580101	4.08621	4.60248	0.352869	82.3205	85.1749	1.51732	77.4535	72.1417	4.26299	5.03994	0.563114	3.05119	0.692615	61.238	2.01763	2.86379	2.109	0.990402	1.06071	0.83991	1.53137	60.5356	8.31153	5.12805	0.802448
NID521	23.7683	1.41658	28.4753	47.2309	1.42232	1.07439	24.7496	3.88325	175.907	127.903	5.66022	68.9674	0.328732	7.99256	2.49876	2.0182	0.631733	2.10685	0.582078	5.91073	6.37817	-0.735789	94.8635	97.7355	1.92843	79.8377	70.7516	4.79931	4.55832	0.0861698	1.54906	0.822861	60.0518	1.96769	3.32009	1.8453	1.43019	1.15693	0.60267	1.48599	60.1023	7.03867	4.39028	0.593978
NID522	26.243	1.21255	21.169	41.7145	1.11386	1.05737	24.4757	5.73415	187.028	141.11	4.55213	51.648	0.308515	8.61265	2.61541	2.00464	0.647119	2.10682	0.598939	5.35744	6.50402	-1.51626	87.2801	92.2007	1.97624	79.4521	71.5123	5.15963	5.85737	0.467122	2.25133	0.891987	59.9822	1.9632	3.77827	2.3981	1.00173	1.11134	0.910612	1.15004	60.6189	8.3435	5.6915	0.825208
NID524	31.959	1.24	25.4003	62.3307	1.18789	1.23302	29.3433	4.29662	154.42	138.972	5.29469	74.0297	0.380834	8.5508	2.70205	2.2442	0.739393	1.89982	0.638762	4.31076	6.21491	-0.121044	97.6837	98.7756	1.88414	76.5735	72.8035	4.23232	4.59472	0.300828	3.41887	0.65536	59.9219	2.11312	2.4028	1.59849	1.11808	1.44401	0.889151	1.51724	60.2608	7.20373	5.89571	0.355948
NID525	27.1185	1.32147	23.7888	53.1333	1.24956	1.03975	28.271	4.29969	199.466	140.218	6.60894	59.5614	0.348501	8.67958	2.68125	2.0214	0.814522	1.82812	0.564053	4.02187	5.72407	0.819263	90.2149	98.605	1.93325	80.1368	77.4207	4.74958	4.79998	0.59342	3.84947	0.826242	59.9531	1.99797	3.54006	2.05093	1.03474	1.68038	0.809715	1.10265	60.8952	8.5688	6.45498	0.90834
NID526	23.135	1.45135	25.1699	42.975	1.44664	1.103	23.4078	3.90968	169.445	137.623	5.55857	60.9485	0.317711	8.08256	2.49184	2.16366	0.746612	1.7525	0.551822	5.16424	7.34146	-1.1047	90.021	98.8754	1.91594	79.9126	72.7881	4.61675	3.6178	0.0296356	2.5542	0.560551	60.0191	2.0049	2.22765	1.72103	1.09381	1.63191	0.617508	1.42784	60.1422	7.98163	5.49375	0.618219
NID528	26.7668	1.14746	15.9845	46.6411	1.12177	1.67833	23.2627	3.63205	136.612	115.066	4.21771	59.2378	0.295449	8.02878	2.44654	1.61768	0.619134	1.55182	0.546393	3.28402	7.0883	-0.437279	81.0332	97.8797	1.41413	80.6538	77.1171	4.31748	5.28925	-0.0105754	4.56074	0.637917	59.988	2.06977	1.74308	2.53896	1.04429	1.28297	0.928818	1.43655	61.9625	8.78979	4.04537	0.87484
NID529	27.6568	1.30593	22.7097	50.8948	1.33197	1.10117	25.4388	3.28043	163.269	112.085	5.72229	64.3647	0.337423	7.88779	2.50309	2.00564	0.563267	1.87046	0.455921	4.61527	5.40252	0.744348	96.3621	110.243	1.8768	79.4585	69.2417	4.36144	5.37836	0.760785	2.54744	0.78543	60.0651	2.01554	2.04804	1.443	1.08447	1.27434	0.818554	1.7683	60.0917	7.12091	4.36645	0.262431
NID530	25.9552	1.1509	25.9148	46.7053	1.10739	1.05096	24.0464	2.75715	190.66	142.208	5.55376	77.2145	0.303303	9.2545	2.56252	2.33748	0.688273	2.21941	0.556777	6.12099	4.20336	0.33901	90.1491	88.5443	1.97259	72.3937	68.6928	4.3416	5.5743	0.84567	3.36805	0.469348	59.9897	2.06676	1.79419	1.41512	1.03549	1.0399	1.40011	1.38878	60.3759	7.68166	4.23412	0.454343
NID531	26.8804	1.36361	25.774	49.4981	1.37181	0.987853	26.1918	3.69678	199.654	125.571	5.80021	78.1978	0.348568	9.19528	2.64862	2.29974	0.830081	2.05839	0.609045	5.40022	4.84816	0.18022	86.9808	97.4745	1.95318	79.4015	76.2634	4.06145	3.36343	0.0608192	1.65792	0.867632	59.9941	2.04075	2.68991	2.24905	0.974543	1.06704	1.33779	1.92752	60.3953	7.88688	2.70876	0.866946
NID533	31.7271	1.1951	24.2813	54.1646	1.12684	1.36268	25.6189	3.41709	160.532	117.607	4.85861	92.8401	0.331725	8.77453	2.72205	2.35547	0.691142	1.67347	0.576155	4.42073	5.71135	0.742421	89.1118	93.7622	1.89453	75.8033	73.0524	4.59444	6.34655	0.516973	4.36492	0.672566	60.0579	2.06304	2.30139	1.49377	1.07151	1.34643	0.539568	1.80402	60.1819	8.67101	5.20432	0.279913
NID535	26.6485	1.22929	11.9629	40.1689	1.13679	1.62705	21.8312	3.27417	139.521	117.345	4.78486	20.6971	0.296756	9.24605	2.85114	2.3639	0.675152	2.13216	0.594116	4.03619	6.38517	-2.02704	92.5722	102.143	1.93316	79.0442	71.079	4.64373	5.64818	0.754776	3.09628	0.758762	60.0312	1.96577	2.49177	1.86653	0.999505	1.55709	0.530997	1.92443	60.8655	6.4744	6.6122	0.459044
NID536	23.8027	1.22269	14.4562	40.7263	1.23646	1.34533	22.4325	2.5741	161.629	121.684	4.40264	72.9911	0.340314	8.18556	2.42056	1.90446	0.660115	2.021	0.500683	5.45277	4.92528	-0.0340347	84.9707	99.1163	1.92039	80.9593	71.4349	3.93852	5.16817	0.375617	3.97145	0.406717	60.0614	2.03006	2.63764	2.21296	0.984118	1.15137	1.16903	1.93277	60.4735	7.08892	5.32149	0.455794
NID538	26.9712	1.18077	19.0983	45.3025	1.50756	1.31843	20.6125	2.14555	172.488	127.989	5.77398	70.5523	0.313196	8.29531	2.73367	2.62174	0.775008	2.27076	0.577441	4.70094	3.98614	1.00981	87.1325	96.4737	1.94338	77.9999	67.6602	4.10447	4.1395	0.523766	4.78053	0.67831	60.1134	2.26143	3.14222	2.31642	1.03739	1.73861	0.476194	1.86645	60.1061	8.12031	5.33365	0.659771
NID539	25.7554	1.30376	25.9715	47.2703	1.30314	1.44819	24.2	3.88478	181.174	141.048	4.83797	60.5751	0.291751	8.58077	2.41684	2.75519	0.735397	2.07176	0.603556	5.21469	5.44561	-0.267043	88.8337	87.7209	2.00195	79.8954	71.9657	4.22235	5.3154	0.733532	3.0681	0.179422	60.0373	2.0526	2.91766	1.76004	1.04005	1.71492	1.24686	1.25429	60.191	6.77703	4.87672	0.411053
NID540	30.3762	1.31995	20.5074	49.7019	1.29035	1.37222	23.466	3.86309	157.874	133.467	5.4681	64.1568	0.30576	7.91597	2.82662	2.1601	0.700867	1.94248	0.607955	4.36915	6.2146	-0.0275183	84.0638	95.5677	1.93221	76.3713	67.6159	4.33944	5.52661	0.0808213	4.5817	0.627314	60.0665	2.1246	1.7965	2.04729	1.40566	1.86387	1.27328	1.87459	61.0906	7.12481	4.42436	0.556362
NID541	31.6578	1.50089	24.0968	50.8693	1.43898	2.73924	23.2145	3.38067	161.368	134.709	6.01769	55.3585	0.331358	7.79973	2.59676	1.89182	0.569865	2.1434	0.549703	4.15109	9.18092	-1.6498	80.8184	88.4145	1.95055	78.6044	73.8645	4.12381	4.19266	0.163362	3.51418	0.800039	60.3855	2.05763	2.05714	2.00894	0.977238	1.41687	0.74871	1.25401	60.202	6.30124	3.46439	0.176375
NID542	25.8652	1.30288	20.7491	51.146	1.42318	1.07684	26.2344	4.80824	173.415	137.626	5.60713	60.116	0.320024	8.67081	2.57125	2.12113	0.711564	1.98774	0.669035	5.43709	5.2746	-0.201459	96.6736	97.061	1.92394	74.9643	72.9761	4.32247	5.19531	0.40638	4.44372	0.543917	60.0735	2.07025	2.68318	2.00632	1.1076	1.51931	0.640171	1.86538	60.5797	7.45493	4.62008	0.591858
NID543	27.1437	1.33774	23.4874	43.8902	1.31628	1.04454	23.6096	4.25361	174.662	138.586	5.35992	74.9823	0.31469	7.81467	2.4615	2.52935	0.718638	1.9484	0.601209	5.43999	4.91062	0.194721	85.6816	91.03	1.97243	74.4736	71.7336	4.0969	3.56854	0.0946408	3.24966	0.592804	60.3682	2.7257	3.46459	1.99623	1.22129	1.11857	0.975571	1.53883	60.4346	7.0452	4.06627	0.532569
NID544	27.0746	1.3731	24.0298	47.581	1.41293	1.29371	24.5259	3.75309	168.544	116.217	6.23398	64.9599	0.318001	8.64935	2.75045	2.12867	0.802604	2.05586	0.605544	3.99382	7.02375	-0.438062	79.0898	98.9128	1.94298	75.5167	66.4961	4.80681	4.95833	0.370912	1.67664	0.624093	60.0165	1.98733	2.61765	2.01507	1.0412	1.90638	0.562745	1.93471	60.8479	7.64881	4.83997	0.847315
NID545	29.7658	1.45344	17.9003	48.9353	1.39144	1.0616	22.0305	2.88198	164.025	135.354	5.33499	59.2318	0.362139	7.9897	2.20101	2.24485	0.667645	1.97937	0.571537	5.50529	5.25953	0.238901	96.483	101.069	1.94186	80.2891	69.394	4.26097	4.7512	0.05385	2.40052	0.848659	60.0292	2.00869	1.94187	1.4003	1.05376	1.90293	0.647802	1.89866	60.5116	6.74713	5.57228	0.180315
NID546	23.8131	1.21383	20.8098	37.7881	1.09472	1.20188	20.9296	2.85606	150.699	137.533	4.80931	72.8302	0.343409	7.9099	2.45622	1.63994	0.690119	1.67268	0.610598	5.06081	4.11093	0.0205702	97.8379	93.119	1.91362	72.488	65.0703	3.60238	4.90946	0.0779079	4.32588	0.533069	60.0307	2.05082	3.44481	2.11239	1.07934	1.76358	1.01515	1.46515	60.1183	7.04509	5.27475	0.567668
NID549	34.2895	1.2726	25.5355	60.9293	1.18075	1.02593	25.076	2.89861	138.345	95.9807	4.42773	75.9782	0.323316	8.41767	2.43674	2.51093	0.77642	1.87723	0.570902	5.03694	4.31372	0.773219	87.6163	94.4518	1.95792	81.2945	72.3899	4.35551	4.01243	0.654426	3.53179	0.592753	60.0279	1.99396	3.17105	2.10163	0.875384	0.856067	0.84198	1.30289	59.7817	6.69403	4.47213	0.58353
NID550	25.9416	1.09576	21.8341	41.0967	1.03868	1.25847	17.6995	2.28664	132.863	107.247	5.17715	87.9652	0.439715	8.36928	2.61748	2.51856	0.723071	2.34111	0.533364	4.88135	3.812	0.215963	80.9574	88.8283	1.63991	77.6714	63.4059	4.28117	5.30796	0.0773381	1.89037	0.72216	60.0506	2.00023	2.63016	1.17983	1.00557	1.42815	0.286259	1.91432	60.0237	5.7148	3.88702	0.109881
NID552	34.1902	1.10151	28.6096	52.9143	1.04316	1.01299	21.0971	3.05195	137.373	130.847	5.27267	80.0962	0.401237	7.99129	2.67516	2.1249	0.616723	2.17244	0.521648	3.87046	5.69871	-0.105163	72.0043	79.1697	2.01681	75.3544	65.7577	3.9861	6.02476	0.473897	3.8826	0.672997	60.0061	2.06137	4.66565	2.40487	2.37343	1.19183	0.46442	1.60477	60.1543	8.11353	4.95884	0.71755
NID553	32.084	1.65697	19.9445	54.0674	1.4577	1.41917	25.5862	3.99681	113.96	105.417	4.78149	58.9494	0.308648	9.37023	2.93694	2.69561	0.781567	2.03416	0.566919	2.69889	9.85241	-1.24261	88.4589	87.2496	2.00345	73.7103	69.719	4.74159	4.25341	0.0540472	3.73458	0.542844	60.046	2.08101	1.83372	1.44107	1.1012	1.94275	0.861312	1.9019	60.3666	8.45206	6.28037	0.800811
NID556	30.796	1.09985	17.2	44.9798	1.0175	0.998334	20.0624	2.43697	110.754	103.087	3.59977	75.8445	0.355181	8.17447	2.74629	2.11847	0.511306	1.68051	0.443473	2.78367	3.48188	1.53099	79.2969	90.2638	1.9968	75.5937	71.2036	3.54578	3.2192	0.127531	3.29208	0.600131	60.0345	2.05785	4.84236	2.36293	0.953287	1.41714	0.470111	1.5702	60.4243	7.07773	4.91785	0.865971
NID558	31.7148	1.47029	17.0465	47.7	1.26399	1.005	20.72	1.67273	106.873	108.871	3.46609	88.5421	0.331251	8.66627	2.70933	2.34548	0.65042	1.81544	0.514371	2.5208	3.16557	1.69832	80.8079	89.335	1.97594	80.2719	66.584	3.83732	4.84607	0.0754473	2.7825	0.862118	60.0936	2.02218	4.91571	1.46526	0.987273	1.08084	0.483688	1.2312	60.2282	8.12177	4.37333	0.886224
NID655	30.9834	1.17496	22.9568	59.9043	1.07763	1.11272	20.6069	2.02791	123.208	113.095	4.52221	85.1357	0.370682	8.98646	2.79391	2.29843	0.722719	1.73195	0.536998	3.02126	4.86298	0.494003	83.0142	88.5243	1.26869	73.343	67.947	3.94303	4.55119	0.0630687	2.38154	0.545809	60.0122	2.38047	1.8784	1.33754	1.04355	1.59955	0.931359	1.76749	60.164	8.1148	5.16492	0.218952
NID657	40.3389	1.34259	19.128	56.5573	1.09054	1.13403	20.6072	1.27917	108.771	99.6098	4.62405	66.8781	0.328627	9.48581	2.90478	2.52716	0.624111	2.10917	0.591729	2.85846	4.27653	1.34962	78.6324	86.59	0.561902	73.3092	65.5703	3.41002	3.6948	0.119852	3.44324	0.599758	60.0098	2.09592	2.84889	1.65855	0.963523	1.12853	0.914219	1.60148	60.4638	7.53175	4.21739	0.398134
NID660	26.5015	1.27641	22.651	48.6895	1.23242	1.18603	23.157	3.77579	162.192	121.189	4.40858	72.8015	0.326689	8.58407	2.25264	1.99352	0.70592	1.79117	0.515851	4.17544	3.83084	0.941712	79.0497	96.2159	1.96406	80.6168	66.1963	4.08963	3.95677	0.026628	3.97108	0.890546	59.9703	2.65016	3.87256	1.73856	0.975403	1.48948	0.962295	1.15398	60.484	8.39206	4.16352	0.77809
NID661	30.0483	1.22718	21.6915	57.1684	1.10117	1.39345	22.0896	3.28121	118.507	106.4	4.95843	82.9737	0.352331	9.02978	2.7804	2.53294	0.67606	2.05947	0.526566	4.23822	5.9143	0.0203866	73.9811	89.2097	1.74574	76.4757	73.1383	5.04604	6.22344	0.53719	3.72238	0.687168	59.9883	2.10989	3.10185	2.06231	1.00337	1.07727	0.862152	1.17039	60.4156	8.42824	4.3554	0.599023
NID662	36.3984	1.29922	22.8027	53.3661	1.01105	1.06651	23.1438	3.71542	136.422	102.129	4.62747	54.1954	0.319877	8.71534	2.59584	2.56918	0.666072	1.87677	0.570871	4.64051	8.51913	-0.942417	85.0303	102.952	1.93658	80.0591	72.7214	4.16489	4.62208	0.266327	2.54997	0.920398	59.9117	1.98161	2.46826	2.4969	1.03621	2.09019	0.696682	1.09025	60.8572	8.71216	5.25257	0.894704
NID663	27.8313	1.3169	19.2109	43.6972	1.23721	1.0476	25.4734	3.31761	156.13	131.45	5.41064	16.8554	0.0627811	9.58255	3.09159	2.61798	0.914412	1.53998	0.569345	4.18997	6.9118	-0.46176	91.1624	95.2612	1.9386	71.8893	66.9118	4.49159	4.38522	0.322197	3.61414	0.213911	60.0172	2.07846	1.57225	1.32532	1.08121	1.70093	0.514679	1.85828	60.4421	6.76468	4.27925	0.62365
NID665	31.8746	1.69282	19.8986	53.965	1.56871	1.01546	22.8213	2.63007	162.826	116.517	5.70069	5.04418	0.02767	8.20241	2.91777	2.15992	0.687205	2.10783	0.505836	3.33192	8.84018	-0.17464	84.7632	98.1362	1.96211	79.855	78.8667	4.41547	4.90866	-0.00329272	6.31403	0.814539	59.9817	2.05768	3.33279	2.59198	1.01629	2.27852	0.939161	1.63922	60.0897	8.34763	5.65632	0.813312
NID666	26.7747	1.22388	16.1154	43.9669	1.08677	1.03656	20.1011	1.47886	107.684	103.356	3.87497	68.3227	0.337157	8.61431	2.71131	1.99324	0.482515	1.65976	0.427567	3.05555	5.15671	0.300127	82.8526	88.0317	1.9791	75.3106	71.31	3.90173	3.71467	0.413346	4.24171	0.586496	60.0337	2.13778	4.56056	2.27493	0.982821	1.02033	0.816196	1.55835	60.5452	8.79612	5.5613	0.876382
NID668	35.0734	1.22831	21.9926	59.1356	1.21201	1.09882	24.1821	4.61885	126.932	108.484	5.38465	81.5416	0.357224	8.84027	2.91325	2.32224	0.824099	2.03876	0.594247	4.0019	6.1395	0.456046	85.9586	87.9383	1.45807	74.661	70.069	4.25038	4.29981	0.282172	2.33672	0.931191	60.0794	2.07316	3.05678	1.89995	2.01734	1.2402	0.576171	1.29213	61.5547	7.16911	2.8074	0.490804
NID669	34.1639	1.27609	17.3041	59.1428	1.12044	1.17673	25.1688	3.37334	151.217	111.976	5.47827	48.66	0.31801	8.23004	3.10792	2.25412	0.757079	1.96898	0.602375	3.86415	6.55984	-0.252181	89.9896	96.6895	1.95669	73.5141	70.4259	3.64342	4.18143	0.33157	4.29015	0.348411	60.0961	2.06391	1.90147	1.43634	1.2549	1.56724	0.403936	1.8853	60.1429	7.49198	4.65772	0.184625
NID670	44.9495	1.53889	22.0845	64.6857	1.13818	1.75135	25.2163	1.61279	138.595	108.371	5.95072	3.72838	0.033523	8.94716	3.50999	2.50098	0.688953	1.53001	0.464503	2.57724	9.09235	-0.217093	94.2474	93.2124	1.91089	75.5324	71.825	3.81722	5.03759	0.551916	4.01995	0.597259	60.011	2.91303	2.3737	1.78338	1.34319	2.14898	0.788024	1.56054	60.2865	6.6446	5.97588	0.156118
NID671	33.2651	1.52427	18.3208	48.8417	1.37572	1.0506	21.7237	2.67545	118.635	101.702	5.75573	10.7701	0.0369933	8.53354	3.13801	1.91546	0.747057	1.89383	0.624944	4.24456	9.16143	-0.334655	88.5491	93.3803	1.52223	69.2228	67.5479	3.22107	3.55884	0.0755468	3.42028	0.387095	60.6424	2.0822	3.31252	2.28038	1.08717	1.51054	0.739318	1.88622	60.5964	7.98096	3.51915	0.647753
NID672	36.0293	0.754929	20.51	54.5761	0.728105	1.03081	21.8768	3.02351	121.708	132.37	4.65879	77.9507	0.367734	8.59774	2.99463	2.2675	0.825397	1.51276	0.54368	3.52537	5.01604	-0.0777158	90.8107	92.8135	1.93739	79.0747	69.6436	4.5933	4.23279	0.0622508	1.82904	0.816723	60.0974	2.74454	1.88898	1.35277	1.08419	1.18249	0.742559	1.80877	60.1596	5.34015	2.04709	0.157458
NID673	36.8389	1.09342	17.2813	53.8903	1.12943	1.01796	25.1994	2.72874	126.906	106.253	4.45154	67.3575	0.332695	8.44698	3.3672	2.46637	0.719746	1.75022	0.415996	3.47618	8.02249	-0.00231718	80.1297	88.3551	1.53139	70.5208	73.5901	4.15909	3.44625	0.160884	2.8195	0.304215	61.4037	2.05721	3.97985	1.6548	1.55672	1.95641	0.549704	1.52163	60.7629	8.48279	2.23053	0.858184
NID674	35.7737	1.39255	14.1797	49.9924	1.21856	0.99534	24.1413	2.72812	120.035	101.066	6.04857	22.7456	0.0672183	8.93591	3.09969	2.46194	0.851183	1.91522	0.619915	2.92951	3.60426	2.02582	83.3497	90.0201	1.97675	73.2089	65.9782	4.46055	5.07273	0.0518574	2.66147	0.219707	60.0187	2.05474	4.8367	2.29879	1.39178	1.11701	0.828999	1.53791	60.463	7.55035	3.23967	0.836793
NID675	37.4976	1.30241	20.8853	55.0699	1.05323	1.15044	23.0032	3.19551	123.687	97.1545	4.64932	40.9909	0.322434	8.16869	3.22141	2.43685	0.629857	2.20923	0.453398	3.61108	10.1649	-0.377763	85.4289	92.2187	1.8426	81.1163	74.4811	3.63228	2.88807	0.1918	2.54177	0.890939	60.0189	1.99681	3.50919	2.37418	1.16048	1.08945	0.704789	1.30932	59.9889	6.34861	2.84637	0.253305
NID676	39.4507	1.42372	15.234	56.1877	1.03956	1.20546	24.362	2.19005	117.69	101.805	4.33654	5.58563	0.0357028	8.60512	3.21122	2.37828	0.698258	1.48042	0.541841	3.2283	6.85819	0.66263	89.1142	88.8002	1.93162	77.1022	75.3326	4.0889	6.00159	0.812428	3.86842	0.691856	59.9957	2.05962	3.69925	2.70438	1.64958	1.1452	0.31871	1.28477	60.2378	8.51017	4.7346	0.814384
NID677	28.9775	1.1412	12.9277	43.8385	0.852791	1.01978	19.5125	1.8878	88.5645	99.9576	3.7542	99.1971	0.35448	8.55597	2.66999	2.49759	0.57538	1.81832	0.533956	2.41076	2.52623	1.93806	81.8363	87.3906	1.81773	80.3344	68.6218	4.04126	6.08309	0.794271	2.02251	0.825952	61.1167	1.98786	3.7643	2.09966	1.15548	1.01401	0.368823	1.68052	60.2245	7.27897	5.59172	0.979276
NID681	30.1794	1.18418	13.5231	44.2895	0.955482	0.986668	19.3906	2.19027	94.1889	99.8273	3.71931	102.003	0.378195	8.07109	2.95252	2.16715	0.654916	1.41039	0.352729	2.33108	3.45979	1.46603	74.9562	80.7555	2.00527	81.0311	72.5312	4.68227	5.62744	0.601893	3.72165	0.625796	60.0577	1.99874	3.89578	2.04024	1.29803	0.969814	0.327215	1.1198	60.3045	8.02172	4.33132	0.882505
NID682	26.4871	1.13201	19.18	42.2371	1.18026	1.02308	23.467	2.83686	177.439	138.612	6.28459	72.263	0.444507	8.97942	2.69655	2.40364	0.868988	2.2194	0.562274	3.42273	5.60415	0.767371	93.4149	93.2486	1.95612	79.5368	70.173	5.07348	5.974	0.421465	4.85626	0.817885	59.9508	1.99734	3.78785	2.70415	1.0583	1.05109	0.233182	1.52359	60.4857	8.52544	5.9734	0.899777
NID683	33.938	1.3604	27.3376	58.714	1.08764	1.0631	23.2576	2.69995	140.706	133.782	5.88017	76.0998	0.328681	9.07507	2.73321	2.26113	0.915816	1.60423	0.567144	2.70198	4.53983	0.932551	84.5635	85.3071	1.76725	79.7462	65.7651	3.90181	3.01432	0.0577523	2.68665	0.946171	60.0217	3.17471	1.93832	1.62267	1.05675	1.18367	1.05529	1.88634	60.2988	7.22161	3.5343	0.0900587
NID685	35.8572	1.57359	26.0816	64.4252	1.50003	1.27389	26.2301	2.99586	119.875	102.66	5.82621	83.3206	0.330412	8.56447	2.84036	2.1257	0.736403	1.63037	0.572802	2.38101	6.48889	0.836498	81.2162	95.3744	1.88546	81.0295	74.5852	3.82117	3.87244	0.0536599	2.35261	0.87516	60.1159	2.07495	2.93036	1.74113	1.33828	1.23366	0.564044	1.88414	60.2289	8.45808	4.57273	0.87635
NID687	38.5091	1.06157	16.6879	54.6215	0.886305	1.63133	25.8238	1.78336	118.856	99.2261	3.7822	14.0596	0.10008	8.55095	2.98253	2.29383	0.692533	2.14058	0.559584	3.09491	6.15023	0.0895138	85.402	90.4055	1.71437	77.2981	72.723	4.1181	4.9531	0.121299	1.86681	0.696197	60.0594	2.03479	1.98674	1.38258	0.94529	1.11943	0.791959	1.22409	60.3222	7.25546	4.27946	0.645045
NID688	31.3127	1.24837	12.2345	48.744	0.973213	1.03335	22.8133	2.0536	110.243	100.211	3.9181	58.442	0.338282	8.72309	2.97678	2.28516	0.577244	1.70284	0.475412	2.49661	3.86639	1.36529	92.2617	97.6166	1.97678	80.6077	65.0038	4.32201	5.56681	0.0616943	4.68942	0.470212	60.0646	2.01558	3.87942	2.05744	1.04407	1.10423	0.597609	1.89314	60.8589	7.9934	5.7035	0.559188
NID690	33.9429	1.04849	23.9804	60.9889	1.00351	1.03614	21.8124	2.09038	137.264	120.581	4.35222	117.591	0.407067	9.12857	2.61994	2.09121	0.772684	1.26146	0.66257	2.89528	5.00707	0.221166	81.0341	91.7241	1.86233	79.8289	77.0641	4.22805	5.35443	-0.0423319	3.7758	0.836009	59.9943	2.10513	4.02971	2.41904	1.01954	1.13961	1.11163	1.49172	60.2097	8.88181	3.26722	0.940298
NID691	31.1137	1.30595	16.5944	60.8954	0.838296	1.03492	24.5837	3.68055	102.953	106.934	4.26392	88.0428	0.364223	8.63698	2.9352	2.27053	0.631433	1.6777	0.545159	2.34853	5.23545	0.249335	79.1317	84.9466	2.02181	81.2563	76.5467	4.21535	5.15761	0.060634	4.06485	0.524801	60.023	2.04075	5.11575	1.97226	1.405	1.02915	0.88923	1.20384	60.4982	7.23568	4.38546	0.922692
NID692	30.9796	1.41796	20.6693	47.7249	1.13453	1.19922	22.3209	1.74143	95.7552	96.9687	4.35252	74.3505	0.416516	9.25601	3.36857	2.97594	0.748843	1.40767	0.559451	3.32098	4.97269	0.311197	90.8438	92.7354	1.90268	78.1241	64.3591	4.54449	4.37337	0.114744	1.71563	0.462061	60.0539	2.09374	2.6989	2.29983	1.10597	1.17908	0.528254	1.80025	60.4366	7.2207	3.12802	0.677487
NID693	31.5818	1.00625	20.9374	55.5856	0.841442	1.00729	22.5264	3.0325	132.317	110.53	4.36479	89.9217	0.357857	8.76356	2.73344	2.84351	0.765267	1.7954	0.551205	2.55749	3.49062	1.85264	85.551	89.6835	1.99298	81.7166	66.2342	4.69658	4.71912	0.415713	4.45895	0.904257	60.0578	2.11758	3.35525	2.01901	1.03918	1.46139	0.982477	1.91792	61.6397	6.98711	4.94555	0.919927
NID694	29.5179	1.38145	23.7495	45.1368	1.17164	2.26188	21.0909	3.13682	102.463	121.092	4.01421	60.0324	0.315175	8.59625	2.63063	2.07826	0.590214	1.97621	0.405252	4.30453	6.72445	-0.164094	92.0219	85.106	1.95145	79.4004	63.6805	4.31085	5.33163	0.0446063	1.92006	0.847774	60.0719	2.03797	1.73819	1.18968	1.08457	1.61286	0.67145	1.83463	60.2219	7.72038	3.96725	0.115472
NID695	30.5697	1.11634	17.3087	42.7904	1.15357	1.17396	24.3115	2.02783	137.454	112.653	5.14	82.2272	0.346149	8.98437	2.97085	2.70788	0.74036	1.55098	0.576887	3.45401	4.976	0.894536	87.7213	97.7946	1.92979	74.9873	64.7868	4.2139	4.03877	0.0698795	3.3368	0.206257	60.0411	2.02371	3.73961	1.33794	1.05408	1.15356	0.730619	1.36636	60.4224	7.68462	4.43272	0.530892
NID696	31.3323	1.20542	20.4841	47.0537	1.155	1.0032	23.9846	3.304	144.77	118.792	5.62546	86.074	0.340368	8.83398	2.98389	2.69519	0.735071	1.76769	0.598448	3.38946	5.22562	0.757051	82.7815	86.1534	2.01763	75.2295	64.5641	3.5003	5.59782	0.0554207	3.71939	0.618485	60.0041	2.09204	4.42715	1.63827	1.89516	1.64367	1.12472	1.64302	60.376	5.97396	3.88162	0.627424
NID698	27.5427	0.849975	25.1666	56.9293	0.89154	2.68333	22.7885	2.26535	124.106	124.978	5.45421	122.593	0.457913	9.0083	2.96149	2.51386	0.741626	1.78571	0.535478	4.05183	5.57448	0.361626	76.5527	78.8915	1.97064	75.1098	65.703	4.63336	4.86083	0.0839982	4.2141	0.539106	60.144	2.14604	5.19199	2.53491	1.00712	0.953234	0.178436	1.95124	61.9221	8.47615	5.31159	0.855618
NID701	30.6115	1.07837	25.2435	55.0551	0.944163	0.99704	24.1927	3.19325	146.317	120.091	5.54323	50.4661	0.343335	8.5619	2.87757	2.11567	0.762948	1.84419	0.567072	2.75269	8.63816	-1.40749	85.1901	92.2726	1.82221	79.7809	76.2553	3.35946	3.45144	-0.0262786	1.80135	0.911605	59.9696	2.02706	1.09099	1.76925	1.03894	2.50114	1.11283	1.85037	60.7067	7.73965	3.14484	0.693011
NID702	31.8616	1.33591	31.4672	55.0434	1.13649	1.15218	25.3859	3.11172	158.088	116.609	4.60441	65.896	0.304634	8.6802	2.478	2.21273	0.826801	1.96863	0.596258	3.68744	7.95345	-0.575404	92.9556	93.3002	2.00447	79.0539	69.939	4.16156	4.23268	0.0665544	2.18479	0.553141	60.0014	2.02069	3.06412	1.87548	1.99956	1.45102	0.804702	1.92651	60.6303	6.3245	4.1712	0.57527
NID703	44.597	1.47959	16.7907	62.4061	1.13773	1.05442	25.6214	4.26577	119.888	95.8441	4.9911	31.2058	0.296774	8.01198	3.06711	2.05316	0.636712	1.83072	0.448745	3.71116	10.6288	-0.699849	88.304	95.1766	1.9978	79.8298	77.9787	4.08808	3.84427	0.018492	4.21348	0.905074	59.9608	1.98905	4.29688	2.48462	1.03106	1.18795	0.461731	1.14197	60.6327	6.84357	4.943	0.893428
NID704	29.972	0.984004	23.4097	52.4026	0.974126	1.43561	25.6667	3.94218	152.234	112.074	5.49674	88.881	0.385093	9.04455	2.61787	2.36269	0.833714	1.79908	0.614683	3.24248	5.60192	0.552488	87.106	93.8304	1.72063	79.7569	66.3822	4.5777	5.2572	0.0354531	2.19312	0.475342	60.0502	2.062	1.78508	1.36664	1.05447	1.20532	0.940468	1.87142	60.2292	7.31276	2.31128	0.697194
NID705	32.4644	1.12362	14.2599	48.2224	0.904291	1.05542	22.9669	4.16881	136.123	107.945	4.13373	56.1528	0.331912	9.12394	2.67304	2.55492	0.712047	2.23095	0.54426	4.91352	4.99444	0.0499785	91.374	105.248	1.93092	75.067	71.8884	4.19247	4.50425	0.0853002	4.13123	0.854726	60.0259	2.00148	3.86491	2.07486	0.997782	1.15091	0.249306	1.80593	60.119	7.01402	6.12869	0.562591
NID706	31.0248	1.13078	16.7323	48.9387	1.02807	1.0267	25.9541	2.63724	131.999	106.425	5.05432	46.0471	0.333206	8.96825	3.04322	2.57085	0.710082	1.96383	0.587729	4.0527	6.46134	0.133904	82.0066	97.292	1.13783	80.1008	71.2678	3.58606	3.83794	0.0750247	5.36335	0.483747	60.0309	2.60531	1.92451	1.74034	1.07195	1.90165	0.586555	1.58798	60.1023	8.36486	6.17138	0.440867
NID707	39.6696	1.51642	18.3449	56.6649	1.27845	0.999778	23.3394	1.77737	140.004	100.51	4.93606	43.4688	0.28353	8.46335	3.10035	2.16172	0.647839	1.63149	0.572876	2.04318	8.02323	0.192555	91.1876	97.2577	1.98375	75.5262	66.2293	4.03654	3.55723	0.0952208	3.19781	0.693513	60.0019	2.01325	1.88785	1.75941	1.05142	1.59791	0.588821	1.89479	60.4151	6.99225	3.53567	0.5582
NID708	50.5731	1.51831	25.5926	72.2614	1.41814	1.09661	26.3383	2.04418	163.957	110.728	6.01816	74.5671	0.368606	8.80811	3.22123	2.70474	0.77526	2.17323	0.652116	2.72694	7.9276	0.549423	80.7426	90.3833	2.02334	81.9573	70.8257	4.07154	3.43666	0.0998891	4.31319	0.966463	60.0691	2.00351	2.42094	1.29058	1.00002	1.6649	0.823315	1.89017	60.6063	6.31701	3.73239	0.558454
NID709	37.0574	1.45445	23.1387	67.1418	1.37449	1.06484	26.9562	2.40485	145.21	103.4	5.70307	73.9379	0.308069	8.22731	2.9352	2.25281	0.538122	1.98293	0.519616	2.30277	8.64446	0.356715	91.0424	93.5848	1.99464	80.0421	65.1928	4.0594	5.24632	0.595663	4.00312	0.763595	60.0971	1.98254	4.58692	1.77537	1.44372	2.11744	0.744815	1.70925	60.3777	7.89735	6.89898	0.946252
NID710	31.9984	1.46348	22.8015	59.3593	1.37477	1.00344	22.9118	2.04101	163.393	114.512	5.42858	99.1308	0.317822	8.73945	2.84464	2.30895	0.816064	1.89821	0.620894	2.29815	6.58295	1.05804	87.9319	93.7424	1.97312	82.1956	63.8657	4.73576	6.43981	0.848848	4.08311	0.928952	60.0583	1.99519	4.29119	2.13863	1.05287	1.66486	0.491046	1.92887	60.6085	7.61987	6.50144	0.946925
NID711	31.6567	1.66921	18.9945	61.2443	1.52282	1.17766	24.4138	1.78836	137.625	109.575	6.08519	52.0914	0.329042	7.51499	3.16026	2.17302	0.521871	1.30261	0.394929	2.82809	8.26625	0.679022	93.4981	95.5005	1.98356	80.5062	70.2462	4.7866	4.29916	0.0668155	3.79523	0.895741	60.0653	2.07222	1.84118	1.37383	1.07345	1.50058	0.835622	1.94382	60.1676	7.60273	5.19717	0.243156
NID712	29.0131	1.43025	15.1135	42.2005	1.17898	0.98172	18.8407	1.86909	91.9354	102.117	4.13934	82.7232	0.359862	8.30232	2.94747	2.25405	0.570666	1.63151	0.544479	2.03368	3.05998	2.11987	81.6452	85.2013	1.96807	76.1746	64.2768	3.46252	4.94789	0.533167	4.02834	0.679388	60.4229	2.02194	4.08948	1.65183	1.02244	1.05347	0.124224	1.91262	61.1277	7.33106	5.89251	0.591751
NID713	33.4218	1.48026	20.4517	49.5131	1.36741	1.0869	22.7946	3.40096	99.7925	101.956	5.5247	32.0646	0.3044	8.60975	3.02	2.41426	0.668072	2.15554	0.46124	4.00716	7.39353	-0.0382783	92.1335	92.7188	1.95638	72.4511	65.6263	4.52289	4.77791	0.0681153	2.62543	0.561016	60.0579	2.06546	1.8186	1.39088	1.11731	1.85179	0.875478	1.39089	60.1196	8.62303	3.92303	0.226476
NID714	34.8556	1.27756	19.4149	48.4084	1.12483	1.06732	21.9007	2.16801	100.397	106.499	3.80389	85.3319	0.373871	9.0377	3.05226	2.57104	0.740124	1.76321	0.554201	3.0765	5.82791	0.937957	77.4328	81.285	1.95192	79.6436	70.5041	4.14166	5.33586	0.837554	4.70303	0.866061	59.9606	2.79575	4.09114	2.60025	2.59633	1.08412	0.494752	1.18943	60.4668	7.8164	4.68926	0.779396
NID715	31.2766	1.21935	19.9566	52.2366	0.994468	1.33619	20.5046	2.84938	124.027	114.377	4.64958	86.5286	0.41206	8.22038	2.67616	2.08249	0.800222	1.64484	0.566719	2.71864	5.86192	0.456462	77.5598	85.2257	1.97725	80.9429	73.054	4.17549	4.84643	0.487468	3.1194	0.932989	60.0044	2.03547	2.99922	1.98144	0.998531	1.37406	0.475157	1.14364	60.1502	8.50708	4.84182	0.843492
NID716	32.2279	1.42448	14.835	56.8771	1.09972	0.985	21.9276	3.48862	130.558	106.622	4.25982	82.468	0.396244	8.42253	3.20727	2.35862	0.689086	1.83204	0.519662	2.70176	4.78956	0.25246	83.5617	86.4793	2.00631	81.2675	78.5716	4.1708	5.06232	0.0656607	4.7885	0.933597	60.059	2.0408	2.6364	1.80749	0.993939	1.52457	0.901236	1.96285	60.3682	7.71965	6.8147	0.432924
NID717	35.0671	1.40308	17.0746	60.7499	1.18594	0.97871	23.3672	3.50906	121.178	100.959	4.5484	89.8593	0.388967	9.23555	2.99535	2.35843	0.701573	1.68203	0.560486	2.64118	4.39702	0.844348	77.9247	84.6882	1.99025	82.6912	77.1922	4.53311	5.51458	0.395192	4.71025	0.902926	60.0823	2.70254	4.92433	2.50622	0.982051	1.07483	0.544767	1.95926	60.1665	8.35562	4.93108	0.43656
NID718	39.964	0.98068	26.8578	49.7591	0.763265	1.29191	22.985	1.96688	107.216	102.855	3.76435	77.0679	0.384263	8.5902	2.55964	2.49051	0.729563	1.96998	0.545267	2.9254	3.92775	1.22311	79.5206	81.4298	2.00587	77.7567	72.1521	4.03186	5.11536	0.103201	2.09254	0.762289	59.9997	2.00776	3.33645	1.77763	0.95813	1.01212	0.140575	1.41177	60.0864	7.50643	5.17695	0.538727
NID719	32.7982	1.14349	16.4015	39.8745	0.79772	1.00386	17.0699	1.53621	83.257	100.61	3.48741	90.3032	0.446603	9.48222	3.29512	2.888	0.738828	2.08897	0.556318	1.98668	2.05229	2.93536	74.0787	82.3991	1.97031	80.5482	66.9558	4.2091	5.13687	0.0215045	2.4743	0.904611	59.9991	2.08329	2.2169	1.74182	0.996357	1.10823	0.959556	1.12327	62.4772	7.35993	3.20001	0.813565
NID720	30.0832	1.47578	17.1391	41.5223	1.30226	1.09709	19.6654	1.9882	107.784	119.641	3.8477	78.4245	0.416457	9.37845	3.09595	2.73024	0.508714	1.87741	0.574653	2.53676	3.34509	1.14514	83.1272	85.2627	1.9967	78.8233	63.7159	3.64706	5.76509	0.00513991	2.88084	0.889584	60.0788	2.70787	1.62752	1.23363	1.03862	2.09109	1.30358	1.52678	61.2928	8.55674	5.19295	0.115562
NID722	28.6524	1.16585	14.912	49.5039	1.00223	1.03344	21.6169	2.96092	106.663	99.7226	3.65889	92.2822	0.408992	8.64817	2.89396	2.37901	0.633265	1.6894	0.463409	2.55479	4.17175	0.900739	89.4172	90.332	1.9486	80.0664	65.4927	4.36489	5.22533	0.500369	4.72428	0.554181	60.0542	2.05408	2.05925	1.40694	1.09871	2.06869	0.931318	1.09843	60.1122	7.97676	5.6354	0.232519
NID723	26.8597	1.28186	13.0465	44.0819	0.998007	1.10263	21.3281	3.01275	116.145	119.549	4.42384	99.6455	0.407982	8.76255	2.97605	2.30891	0.70819	1.65468	0.56748	2.50935	5.24408	0.305426	76.5931	82.2877	1.61193	80.5896	74.98	4.80353	6.6124	0.743656	5.39522	0.797828	60.0152	2.06605	2.31871	2.50504	1.34629	1.07154	0.538779	1.16215	60.5138	8.56908	4.99719	0.818369
NID724	26.7668	1.14489	20.0448	43.1404	1.17339	1.00341	22.606	3.08413	189.561	140.098	6.22632	74.3921	0.301443	8.44458	2.65639	2.05003	0.660793	2.04401	0.631004	5.53174	4.7778	-0.0511265	80.1853	89.0936	1.67074	79.1968	71.3195	3.95926	5.37956	0.0904441	2.50677	0.89886	59.9987	2.05455	1.33546	1.94622	0.978956	0.951298	1.53204	1.84824	59.9928	7.70278	2.33153	0.452968
NID725	29.3971	1.32829	12.9996	48.1941	1.12373	1.03794	20.0795	2.06926	95.4624	95.185	4.8699	78.4465	0.346641	9.12735	3.05056	2.2915	0.632995	2.07082	0.561882	3.03621	5.13252	1.24127	79.4634	90.9911	1.93241	80.5987	77.841	3.8552	5.20196	0.512358	5.51885	0.834384	59.976	2.02885	3.01535	1.88271	1.02293	0.963931	0.609077	1.12665	60.9012	8.76088	5.54682	0.589606
NID727	29.7913	1.32801	18.1881	50.4425	1.0839	1.01454	23.7373	3.15786	116.446	97.7743	4.36319	89.8578	0.395757	8.14566	2.77418	2.13225	0.522658	1.85146	0.381341	2.5784	4.17817	1.11887	89.5946	92.2608	1.99582	75.0869	64.791	4.18929	4.11648	0.14008	2.11622	0.693578	60.0231	2.11109	2.89314	1.47302	1.02069	1.07527	1.31277	1.48817	60.4617	4.93702	4.02333	0.700135
NID728	33.0815	1.4521	21.5569	53.3502	1.24529	1.53062	25.0102	3.00642	133.112	100.28	5.31156	14.7724	0.154752	8.66965	3.19209	2.54976	0.678172	1.99701	0.565706	3.33826	9.08769	-0.959624	93.8045	96.786	1.98262	80.0957	71.1192	4.6303	5.03659	0.00878378	4.59212	0.780631	60.0492	2.00822	1.83103	1.43839	1.08542	1.84513	0.58132	1.908	60.2066	7.06523	5.62978	0.561445
NID729	31.1643	1.12295	17.5393	46.104	0.906555	1.06122	23.1004	2.22299	101.251	98.3439	4.19435	74.1059	0.379854	8.9206	3.0064	2.17454	0.809393	1.89789	0.546989	2.90907	4.29001	1.37535	95.6026	99.0889	1.86045	79.4184	64.2257	4.39739	4.23335	0.0645818	5.20452	0.803677	60.054	2.76235	2.26992	1.44546	1.08995	1.13301	0.671362	1.37194	60.5006	7.22211	5.76267	0.234717
NID731	26.4617	1.34623	24.9437	47.4975	1.20627	1.07492	22.8151	2.83488	172.033	137.64	5.75081	80.9034	0.326113	8.27273	2.56778	1.97067	0.704943	2.06611	0.590448	3.71914	5.645	0.563376	83.8528	87.9471	1.9942	72.8651	65.09	4.88249	4.67434	0.106051	3.48444	1.02112	59.9757	2.64196	3.11564	2.20076	1.01119	1.08487	0.944232	1.42402	60.5149	6.82115	4.70932	0.916745
NID732	28.6443	1.36869	20.9597	42.7894	1.21408	1.02102	19.8391	2.30685	116.412	104.782	4.48987	93.1755	0.410353	8.6489	2.96577	2.55525	0.748709	1.87467	0.61115	3.27145	5.578	0.203185	87.6806	90.0625	1.99103	74.1611	65.0463	4.51223	3.92647	0.083535	3.21642	0.572133	60.0127	2.10747	2.03067	2.38094	1.07933	1.04093	1.42589	1.40242	60.0418	7.4261	3.85893	0.74487
NID733	28.2515	1.04472	23.0617	47.7196	0.940685	1.23922	18.2516	2.04268	115.517	110.022	3.97409	87.3412	0.389751	8.41501	2.71442	1.9942	0.615793	2.00142	0.45753	4.03016	4.87649	0.524274	78.0498	88.7524	1.95442	81.8977	64.2832	4.55681	7.69063	0.292708	3.56351	0.909824	60.0449	2.02801	2.15703	1.47757	1.05828	1.50572	0.918699	1.914	60.1531	8.67725	5.33695	0.390682
NID734	33.4094	1.7236	29.593	62.7356	1.6479	1.23088	29.5308	4.84168	213.047	143.161	6.58221	92.2968	0.30519	8.90221	2.70231	2.31579	0.825746	2.08412	0.593864	5.07322	6.46996	-0.0506819	78.7301	84.731	1.58901	74.9929	71.3034	3.69339	4.48937	0.381012	3.07755	0.635914	60.053	2.08142	2.79321	2.17153	0.997288	1.09445	0.939552	1.40516	60.082	8.12596	3.66914	0.355935
NID735	34.5241	1.30881	15.0481	47.59	0.994246	1.01072	22.3224	2.56844	100.987	99.7919	3.80851	62.1799	0.34608	8.27771	2.88441	2.0601	0.531713	1.7385	0.355243	2.30088	4.92377	0.877279	74.9505	85.2481	1.97889	81.4596	72.9764	4.60811	6.10878	0.549971	5.51693	0.632747	60.0535	1.9738	4.8869	2.47097	1.01255	1.04206	0.0967991	1.20351	60.5042	8.35541	4.82439	0.762919
NID737	29.8035	1.3082	16.7452	56.7687	1.1645	0.993834	22.7377	2.8388	127.054	108.84	4.6024	105.718	0.359283	9.10986	2.88316	2.36983	0.726224	1.58107	0.57097	2.31175	3.71181	1.35547	87.0718	89.1392	1.99213	80.5963	64.8007	4.63346	6.51112	0.0542146	4.05313	0.582269	60.0677	2.12821	2.3087	1.44774	1.06756	1.84148	0.96662	1.88189	60.5241	6.77335	3.24463	0.27189
NID738	29.7941	1.16621	19.1539	50.6776	0.980021	1.02408	21.9601	2.57942	117.894	111.419	4.43069	105.729	0.385903	8.57259	2.97106	2.16938	0.598939	1.9811	0.429702	3.35202	3.61696	1.1422	79.6041	82.1537	2.00801	74.0785	64.6986	4.09775	6.48939	0.439401	3.00525	0.593824	60.0169	2.67992	2.48443	1.63323	1.02956	1.01105	0.594013	1.1029	60.8077	7.91798	3.85847	0.48909
NID740	29.0775	1.46133	18.3166	54.5188	1.41989	1.02803	21.5436	2.40665	119.276	110.476	5.15012	62.9746	0.30571	8.2541	2.86744	2.08451	0.762109	1.71519	0.551849	2.31333	5.69649	1.17676	93.5097	98.9685	1.93046	80.6085	68.7318	4.59142	5.35752	0.220002	3.85681	0.881956	60.0974	2.05889	1.88327	1.34926	1.08702	1.3849	0.436268	1.88339	60.1043	7.80261	6.0363	0.227237
NID741	24.7316	1.31753	15.6469	38.7044	1.06985	0.997177	19.6893	1.51439	91.0853	101.151	3.71613	91.6821	0.443655	8.55807	2.99669	2.27135	0.473042	1.71344	0.507328	2.60696	4.23801	0.428111	82.8773	87.157	1.97422	74.7081	68.3329	3.63693	5.4819	0.429967	2.8742	0.558307	60.0269	2.06905	2.29524	2.74821	1.03941	1.3903	0.883395	1.49218	60.007	6.61058	3.30753	0.534152
NID742	29.6409	1.35777	12.7533	42.2337	1.08513	0.982453	20.7085	1.7629	94.4958	103.786	4.26957	74.3774	0.380781	8.74539	2.88293	2.01559	0.551531	1.69416	0.478416	2.66901	4.2759	0.649639	77.3762	79.3992	2.02347	75.2937	65.7003	4.58465	6.50761	0.497177	4.60998	0.611356	59.9761	2.01148	2.94274	2.50236	1.00087	0.94172	0.08532	1.1531	60.0793	8.41262	4.73015	0.844028
NID743	26.9386	0.980137	11.4948	39.8619	0.70749	1.02312	14.5491	1.35601	65.4683	96.6833	3.13119	87.6449	0.397378	9.15422	3.11026	3.01222	0.813898	1.8299	0.558199	1.64729	1.47819	2.85641	85.0889	88.8921	1.97729	67.0136	63.2439	4.19643	3.71826	0.0722447	4.60553	0.245863	60.0373	2.56018	2.05235	1.64179	1.05116	1.44424	0.979288	1.07982	60.6655	7.66584	5.37433	0.369552
NID744	29.8433	1.07585	22.4709	54.0022	1.06198	1.12183	23.8373	3.33344	184.504	152.511	5.31921	87.4855	0.360173	8.00714	2.5672	2.04625	0.642635	1.95166	0.579445	2.86952	5.31058	0.846764	87.5501	94.3476	1.91894	80.6306	76.731	3.60474	5.94133	0.40725	3.22778	0.853736	60.0428	2.75548	4.48499	2.70589	1.0163	1.16935	0.747832	1.87228	60.5077	7.9365	4.86149	0.898241
NID745	39.3066	1.30287	23.109	62.8966	1.28146	1.21889	26.2574	3.08999	188.758	135.012	6.48086	52.6405	0.331062	8.56435	2.92924	1.8522	0.750704	1.91854	0.613601	3.13257	7.817	-0.144277	81.1498	99.9396	1.93837	80.7522	74.1547	3.67049	4.86275	0.0464863	3.46004	0.619912	60.0023	2.02899	1.48058	1.19471	1.00761	2.09318	0.57409	1.6148	60.1652	6.24092	4.12713	0.10385
NID746	31.2826	1.10429	18.8442	58.5631	0.967291	1.39395	22.4069	3.48474	138.077	114.947	5.74141	86.7216	0.395156	7.67824	2.76003	1.96539	0.732205	1.78019	0.561455	2.67595	4.84785	1.10144	81.4477	95.5108	1.96606	78.6946	74.3568	3.42288	4.69618	0.0370311	2.03397	0.759529	60.2057	2.05843	3.31723	1.52122	0.982458	1.80306	0.963469	1.74509	60.1464	8.03578	4.41242	0.679913
NID747	35.106	0.850701	16.7936	53.1273	0.769427	1.03414	20.1412	2.76231	134.91	133.063	4.13286	107.679	0.357717	8.38872	2.5975	1.98696	0.518711	1.99406	0.513507	3.14716	4.87359	0.80947	75.934	84.0789	1.98048	81.204	77.408	4.6026	7.81869	0.817077	4.97732	0.860097	60.008	2.44236	3.92587	2.65217	0.985128	0.992724	0.791568	1.12726	60.2057	7.99662	5.67056	0.856856
NID748	26.6253	1.19734	16.3291	43.2801	0.962802	1.00901	20.6867	2.13767	93.7197	105.941	3.82151	97.241	0.348109	8.96351	2.93101	2.53285	0.66796	1.96195	0.551911	4.32376	3.30726	1.6761	75.9417	78.1833	1.95186	80.6022	75.1808	4.75383	5.17922	0.512542	5.01379	0.809024	60.0171	2.68883	4.31942	1.93822	1.00231	0.947237	0.44344	1.21409	60.3734	7.92865	4.68449	0.522228
NID749	33.7007	1.29036	20.0231	52.3978	1.21935	0.977625	22.9795	2.59636	116.875	105.526	4.51322	92.3471	0.351007	8.86906	2.87721	2.14645	0.840022	1.82101	0.613786	2.61696	4.38218	1.24834	78.4505	78.7355	2.01552	80.5581	64.0822	4.69707	5.59984	0.0454148	4.50767	0.966657	60.987	2.00102	5.08455	1.82258	0.988804	1.74699	0.438098	1.98779	60.113	8.33018	6.19719	0.831547
NID751	26.3759	1.23223	28.1574	47.1747	1.21243	0.99281	24.0307	3.71637	181.155	139.193	6.19897	62.8331	0.322383	8.42149	3.14881	2.49485	0.741029	1.78771	0.516811	3.03257	4.06251	0.932161	85.9169	87.665	1.6221	74.9925	65.7311	3.82666	6.17087	0.504828	3.7656	0.622822	60.0575	2.04355	4.76151	2.20842	1.03803	1.88829	0.569293	1.1137	60.4888	7.72482	5.65851	0.478434
NID752	34.3117	1.62298	22.9921	60.5197	1.51985	1.14579	28.1207	3.94559	157.378	107.395	6.01566	36.0729	0.324944	8.61429	2.77491	2.08287	0.693188	2.01467	0.617853	3.20221	5.14813	1.57065	100.355	105.767	1.89606	80.6034	77.9951	4.03836	5.2546	0.0421201	3.89264	0.850488	60.028	2.05267	3.02357	1.97701	1.04009	1.25472	0.623772	1.87508	60.9303	6.49976	5.76931	0.675601
NID753	29.4535	1.37089	22.9015	53.7983	1.24702	1.0288	26.3156	4.10543	151.656	131.585	5.9893	75.5615	0.325956	9.04882	2.53931	2.15086	0.828986	1.66451	0.577724	4.17321	4.45739	0.643929	83.5605	87.9295	1.95554	77.7005	74.9867	4.45968	6.24808	0.0316327	1.88147	0.853495	60.0065	2.0765	4.87708	1.96658	1.30127	2.2478	0.919455	1.93294	60.2096	8.13108	4.25752	0.843833
NID755	24.6718	1.28262	20.7558	43.0857	1.16828	1.4193	25.0619	3.4863	156.408	123.456	5.27759	80.3849	0.311278	8.38978	2.356	2.0892	0.796091	1.5563	0.587196	4.5914	4.20853	0.797969	82.813	84.8525	2.03288	75.2514	65.3642	4.65206	6.40397	0.0318866	3.65743	0.615688	59.9612	2.0657	2.14785	1.88655	1.01823	1.09886	0.897474	1.22903	60.1974	8.24312	2.34695	0.136552
NID757	29.5292	0.962074	21.107	51.449	0.868802	1.01416	22.8887	3.31141	126.966	108.507	4.60427	105.572	0.399655	8.75757	2.84611	2.28942	0.710477	1.78102	0.605017	2.82896	2.77148	1.99383	76.3886	88.6431	1.46564	77.7201	65.0486	4.24129	6.54072	0.563333	4.15374	0.719612	60.0608	2.04332	4.2729	2.08625	1.02366	1.04892	0.43687	1.93464	60.6329	8.30033	4.3958	0.606402
NID759	26.1689	1.30561	22.1239	47.0814	1.32319	0.989254	24.3238	2.92879	181.468	139.725	4.49396	72.5796	0.312216	8.74141	2.57181	2.22903	0.771623	1.68691	0.664249	4.8201	5.85096	0.0922746	87.0993	87.5539	1.7861	79.4755	75.4128	3.99206	3.98076	0.0277712	1.6299	0.885346	60.0315	2.04435	4.15307	2.65921	0.985079	1.11837	0.94219	1.99453	60.6852	8.28226	1.94096	0.904851
NID760	28.2692	1.20477	13.5841	40.91	1.06304	1.28299	20.18	1.99456	96.6676	100.725	3.89047	68.1791	0.433345	8.95701	2.59136	2.42618	0.570174	1.77334	0.516176	2.08396	3.354	1.34249	88.2244	95.0608	1.98892	73.9653	64.1413	4.86341	5.41706	0.0602144	3.1611	0.58782	59.9893	2.85579	4.91469	2.43964	1.0185	1.77312	0.566195	1.9211	60.1506	8.07467	4.11512	0.948437
NID762	30.6601	1.1894	19.4466	54.7993	1.08098	0.982913	20.1293	2.34664	121.107	103.928	4.94036	77.0743	0.431035	8.58956	3.49475	2.8532	0.741183	1.97994	0.568099	2.94649	5.33493	0.406113	80.1766	88.65	2.00802	81.6688	78.5196	3.99154	5.06591	0.291178	4.77283	0.788526	60.1489	2.08392	2.80174	1.6654	0.983157	1.09623	0.35573	1.73363	60.0477	6.01108	5.151	0.361139

## Sheet: DB (BLUEs)
NSFTV_ID	AWN_BINARY	AWNPLU	CULM_ANGLE	STOLON_BINARY	DTHD	FLFLG	FLFLWD	HULGRCO	HULGRLG	HULGRSURFAR	HULGRVOL	HULGRWD	PBRNB	PNLG	PNNB	PTHT	SDSH_BINARY	UNFILGRNB
NID401	1.03423	8.9481	7.34933	0.486498	95.204	25.5736	0.718895	28.0817	8.36757	35.3917	6.27751	2.46896	4.86822	16.1638	9.23081	119.004	0.930961	5.81155
NID402	1.02219	8.83868	2.75948	-0.0592658	92.3692	29.7574	0.884698	28.8226	7.79344	37.3417	7.54916	2.79935	5.91267	18.6798	8.20629	115.76	0.921677	4.72571
NID404	1.02928	7.99338	7.95772	0.0464807	89.6562	28.1291	0.962664	29.8845	7.39939	34.2624	6.61444	2.6925	6.10991	16.401	6.7959	112.393	0.897733	3.71574
NID405	1.03489	8.36789	3.48448	-0.143704	96.7998	31.6827	0.958725	29.0235	7.09793	32.3099	6.20482	2.64718	5.19662	16.7926	7.03892	101.735	0.928932	4.42406
NID407	0.212027	1.00682	5.27916	0.0176965	94.7894	25.3225	0.879076	31.0644	7.75902	37.6588	7.85441	2.90161	5.99583	17.9444	3.66044	132.187	1.01287	6.15909
NID408	0.380981	2.58611	4.37414	-0.0922885	85.5696	34.3611	1.13961	31.2482	7.97509	35.3162	6.65855	2.60838	7.21996	18.1191	8.3808	94.0843	0.526069	6.73286
NID410	0.765851	6.78165	6.70316	-0.0980484	87.5412	28.3584	0.799068	30.6281	7.69272	29.9264	4.93412	2.25168	4.52504	16.5266	10.1405	84.802	0.673799	3.18078
NID413	1.04512	9.03275	8.75973	0.412953	86.878	30.8427	0.97805	30.1269	7.92858	40.3234	8.67005	2.99531	4.96889	15.9263	7.84741	98.7559	0.944483	2.66105
NID414	0.0953479	0.315685	4.71502	-0.0631922	81.329	28.0441	1.09468	31.3144	7.17276	34.6211	7.13187	2.88639	6.93877	17.3637	8.00101	94.7416	0.966044	3.22383
NID415	1.0211	8.84533	6.4152	0.366268	84.4381	27.319	0.989175	29.3376	7.78709	37.9182	7.85325	2.87703	5.23106	16.1587	6.99485	115.602	0.91041	4.24567
NID416	0.284283	1.87653	3.36353	0.0773382	105.914	29.2832	0.891886	31.3725	7.43448	34.917	6.93148	2.7539	6.49195	21.0486	8.21684	141.931	0.931364	6.87865
NID420	1.04276	9.04804	4.77899	-0.0248098	111.765	18.6976	0.665179	22.6806	7.11748	30.3086	5.64299	2.54546	4.8622	14.4101	11.9076	110.464	0.948159	5.23174
NID427	1.04869	8.99118	6.8092	0.0144628	117.049	25.5838	1.07871	22.3298	7.99479	37.7958	7.6353	2.78993	5.58686	18.1167	5.62517	109.261	0.960818	5.20149
NID428	1.04885	8.91031	3.28227	-0.0838617	84.3152	24.2898	0.835057	28.7841	7.38289	31.6459	5.79869	2.56867	5.60787	15.4945	11.5266	103.32	0.94781	5.70138
NID429	0.53324	4.24833	5.74046	-0.0687679	104.221	27.397	0.838223	25.876	7.57811	35.2393	6.99789	2.73875	6.22058	20.625	5.34556	143.363	0.957365	5.62873
NID430	0.785679	5.69426	3.0131	-0.112898	91.0219	31.4409	0.969874	28.9437	8.22519	37.4985	7.26512	2.66145	6.13777	18.5717	7.07772	112.723	0.783696	5.91527
NID431	0.802342	6.57992	6.15252	0.317619	94.1307	23.0855	0.820016	28.933	8.10639	36.7977	7.10011	2.6836	5.63093	15.7497	9.75603	99.6303	0.781593	4.84242
NID432	0.663148	6.64325	2.8978	-0.167852	107.685	26.708	0.893303	22.7368	7.91156	30.1302	4.86839	2.2329	6.5474	19.6544	7.65063	133.782	0.855674	6.2043
NID433	0.864476	7.57726	6.56132	-0.129556	113.705	26.3108	0.855559	28.0886	7.74219	34.9666	6.70014	2.67541	5.51881	18.0511	8.316	133.816	0.983941	5.31066
NID435	0.862948	6.7849	5.15866	0.178278	106.446	23.3059	0.940045	28.3347	7.67935	32.9157	5.99417	2.53008	5.72745	18.4184	5.64571	134.918	0.975861	6.43125
NID437	0.778772	5.81433	5.33225	-0.0263741	93.6417	25.9103	0.885712	29.5806	7.76476	31.1871	5.31323	2.34616	5.33677	16.7815	7.03448	107.597	0.886595	4.5584
NID438	0.869841	8.87175	6.45869	0.377396	94.757	27.0839	0.72454	23.5694	7.82243	34.023	6.31745	2.57813	4.17456	14.546	9.88585	102.329	1.00786	4.82825
NID440	0.859112	8.88484	6.38964	0.374266	96.3972	30.7472	0.9106	28.3984	7.87021	39.3541	8.3524	2.9688	5.67404	17.1485	6.46961	117.357	0.990096	4.54421
NID442	0.86586	9.02011	6.60234	-0.141996	77.1876	25.2519	1.11285	27.0262	8.26286	39.6035	7.95788	2.82318	3.85187	12.5714	7.19172	78.5677	0.99644	2.5685
NID443	0.870991	8.98842	6.10955	-0.125803	73.839	26.4884	0.872137	29.9269	8.71488	44.8204	9.75891	3.03616	3.54727	11.5115	10.8698	83.028	0.99659	1.65624
NID444	0.866706	9.01021	8.60138	0.440226	76.808	20.9241	1.01173	29.5782	8.07657	38.9585	7.83838	2.8327	4.56328	13.4817	11.504	83.297	1.00244	2.27586
NID446	0.865021	8.955	6.01123	-0.111028	84.074	22.4724	0.914638	29.6096	7.91591	40.1842	8.64757	3.00191	5.1841	15.2206	9.0439	111.828	0.999757	3.30094
NID449	0.868364	9.02933	8.63159	-0.131218	82.6027	16.4845	0.629201	31.9328	7.43168	29.0919	4.76104	2.28213	4.62221	14.1568	16.4571	83.5818	0.996748	3.83954
NID450	0.849877	8.79809	7.68099	0.425786	93.0216	21.0015	0.862393	27.6861	7.88607	35.6791	6.7485	2.61029	4.97428	15.0475	10.3734	93.1418	0.986782	3.22277
NID452	0.850539	6.14101	2.61946	-0.136739	108.014	32.947	0.925718	29.7578	8.04089	39.3193	8.09708	2.86036	6.91797	19.5913	6.41368	126.14	0.964221	6.3098
NID453	0.75587	3.36475	4.50207	-0.11227	92.9157	35.1985	1.06171	29.7726	7.87582	32.1336	5.54909	2.42213	7.09398	19.9208	6.829	132.605	0.979996	6.9349
NID454	0.872734	8.49213	6.94479	-0.117209	81.6638	33.6235	1.01232	30.1038	7.10519	35.4274	7.46889	2.94074	5.48375	17.7578	8.33092	100.008	1.00273	3.97311
NID456	0.874525	6.44283	2.39889	-0.0967769	132.788	22.7166	0.892271	32.2884	7.46468	36.4871	7.57045	2.88926	5.38441	16.0183	8.24399	70.6255	0.969772	4.12593
NID457	0.893461	8.88214	4.31619	-0.0814795	82.8662	23.185	0.956006	29.2576	7.53486	38.7228	8.33197	2.96965	6.43243	17.5907	8.66823	126.626	0.614856	5.86412
NID458	0.876826	1.33524	2.30094	-0.065871	112.61	26.1376	0.888874	28.6678	7.43413	31.3311	5.57235	2.50202	5.34585	16.8043	8.28566	102.686	0.929988	6.24969
NID460	0.880965	7.7732	4.18483	-0.0703752	96.8087	24.8329	0.810497	30.2106	8.19583	39.6386	8.01093	2.83694	4.96179	15.9743	9.28849	106.804	0.914125	4.28182
NID461	0.88195	8.38864	2.54079	-0.0784989	102.459	30.9862	0.881373	29.4491	7.75127	34.339	6.483	2.59236	7.24791	19.8854	8.54279	118.413	0.931364	6.03658
NID463	0.884897	9.08388	8.76474	-0.0525191	112.226	20.191	0.723639	29.8513	8.60163	41.9165	8.5939	2.90497	4.37862	14.3189	8.93632	109.299	0.935305	2.90154
NID465	0.870282	8.60304	4.7456	-0.000899534	93.2479	34.0774	0.991968	22.3451	8.35725	38.5847	7.51766	2.71694	6.26743	20.4834	7.73987	114.404	0.991776	5.36885
NID467	0.883266	8.8519	6.30461	-0.0441833	91.589	28.3594	0.834052	23.594	8.38037	38.3165	7.32014	2.6283	5.62537	19.368	10.4906	136.364	0.466985	5.03699
NID471	0.918232	6.79792	3.21113	-0.0673412	93.9337	25.0597	1.07857	29.9394	7.39415	35.2249	7.12027	2.86876	7.85491	17.1974	8.06267	70.6593	0.906539	5.69884
NID472	0.894759	6.55694	4.85252	-0.0737404	87.6643	19.267	0.607577	28.1015	7.27309	29.4857	4.95943	2.30807	3.79422	13.8852	18.1345	95.6567	0.876264	4.379
NID473	0.903419	8.97323	6.17736	-0.0733439	92.9285	22.7349	0.84558	29.889	7.63653	37.9278	7.88384	2.92428	4.20852	15.9164	12.7359	98.9294	0.888526	2.75625
NID474	0.940666	8.79758	7.76818	0.401932	109.764	24.758	0.72115	23.5609	7.64797	36.355	7.31499	2.75582	4.74746	16.0154	4.46762	146.711	-0.0145927	5.09894
NID475	0.89244	8.76517	4.21968	-0.0819387	97.1387	23.0095	0.735652	32.252	7.09682	29.5359	5.21403	2.48918	7.19667	19.4334	10.7476	130.356	0.88479	6.16208
NID477	0.898066	3.87593	3.24973	-0.0641268	96.1795	29.6162	1.00657	29.1229	7.62499	33.9284	6.29147	2.58035	7.54511	20.7483	5.60187	126.38	0.880602	8.30514
NID481	0.904284	8.94921	8.05605	-0.0777814	82.1972	28.2134	1.03375	31.7371	8.18707	35.4049	6.38788	2.50632	5.15902	16.8065	10.6755	84.7286	0.894649	3.80751
NID482	0.905272	5.78828	5.76961	-0.0520948	84.9653	29.4593	1.03081	30.2525	7.7007	38.7757	8.21694	2.95417	7.01367	20.1669	7.81524	109.304	0.890183	5.18679
NID483	0.897653	8.8342	6.61547	0.285004	81.0389	24.4192	0.877283	30.1895	8.04962	35.825	6.77839	2.58868	4.97392	13.792	12.1244	92.7758	0.882365	3.54954
NID484	0.830981	8.17515	7.19133	0.48888	116.07	18.7767	0.696729	27.3439	7.89945	32.8459	5.73715	2.43123	4.01582	14.4744	11.0888	91.2054	0.837983	3.00798
NID487	0.911098	8.86008	8.07616	0.36904	92.8611	20.4145	0.74972	29.842	8.12684	39.0506	7.82243	2.79248	5.46029	14.9726	8.78653	118.152	0.886458	2.30005
NID488	0.890545	8.84154	6.3222	-0.0591073	86.0839	34.2526	0.933125	34.7464	7.8776	40.443	8.80057	3.0236	6.73838	20.4139	8.31862	123.673	0.877519	3.87841
NID490	0.913062	8.381	4.73126	0.000694735	123.046	26.3387	0.901387	16.2669	8.02655	33.5395	5.97156	2.50342	4.64241	17.4566	6.82643	117.499	0.893468	5.00587
NID493	0.903425	8.89075	5.31627	-0.0745672	73.3135	29.1407	0.903097	29.5478	8.2432	40.9057	8.56599	2.87208	4.37889	16.0749	9.94924	81.4981	0.880327	2.32464
NID494	0.879845	6.1293	7.06103	0.385139	102.381	23.0668	0.870344	26.8377	7.54845	29.2171	4.73648	2.26089	4.69383	13.4067	10.7599	90.0198	0.905242	4.62603
NID495	0.884629	8.86901	4.45413	-0.105688	103.922	26.4601	0.770609	32.7239	7.09597	30.3538	5.51731	2.55906	6.77836	17.839	11.5167	119.27	0.912131	4.00768
NID496	0.911445	8.27888	3.94256	-0.00719838	100.639	24.9293	0.983437	26.145	7.53418	33.585	6.34465	2.59761	7.84951	20.6439	7.62338	142.006	0.903178	7.41117
NID498	0.892805	8.96036	5.46412	-0.0629361	100.709	22.9004	0.70484	29.6775	7.66672	33.3728	6.14066	2.56961	5.00636	14.8769	13.7912	95.6071	0.925927	4.59173
NID499	0.893243	8.5141	7.37082	0.328279	101.068	26.8896	0.859404	25.8923	7.9832	35.0193	6.54472	2.54268	5.28416	19.9899	8.24039	131.441	0.671676	5.89096
NID500	0.895227	8.81189	4.24583	-0.0596821	86.7966	23.9572	0.875937	30.0474	8.34093	37.4664	7.08531	2.61213	5.75829	17.7859	10.1369	101.287	0.91526	4.74986
NID501	0.875505	8.96767	7.90965	0.0458664	80.8324	18.3417	0.693931	30.8787	7.70469	31.5621	5.37877	2.3964	4.76492	15.5335	16.4568	94.6204	0.923772	2.78315
NID503	0.865594	6.80924	3.69463	-0.0365785	109.624	23.3246	0.869606	15.1468	7.76553	32.8073	5.76649	2.40866	4.42544	18.8117	6.75765	120.712	0.891822	4.81972
NID505	0.80614	5.30824	9.04876	0.766088	112.694	35.1584	0.813041	24.8685	8.63867	41.3514	8.46331	2.82942	6.23768	21.2286	7.89691	155.126	0.910819	5.98718
NID506	0.896391	8.79465	2.92878	0.211927	99.1382	35.3355	0.99886	36.7904	7.46894	37.7225	8.12195	2.99982	6.62059	19.2549	7.11841	118.425	0.920939	4.33192
NID508	0.00951664	0.877832	3.56206	-0.0310942	91.2468	23.9828	0.923048	31.2589	7.85768	37.7897	7.74142	2.8634	5.03702	16.5729	9.55293	105.759	0.934328	5.45409
NID509	0.797129	6.14488	4.8511	-0.0681866	91.672	31.4382	0.90429	35.5476	8.05564	34.5908	6.24178	2.52521	6.79631	18.6446	7.06856	120.639	0.89713	5.51565
NID514	0.888678	8.9817	6.82096	0.295501	97.822	21.6087	0.698204	19.2039	7.49438	32.323	5.96059	2.5304	4.10433	15.6346	15.5014	107.016	0.920736	3.92717
NID518	0.890966	8.96585	6.35304	-0.0617983	101.302	23.616	0.74637	24.9413	7.96845	33.5431	5.91066	2.4458	4.51059	16.5144	13.9309	93.0503	0.921193	4.52175
NID523	0.887942	8.88799	4.67619	-0.082761	77.8892	25.9196	0.836966	30.4568	7.17342	28.6931	4.8528	2.34626	5.57978	16.8261	12.5029	94.222	0.926331	4.06379
NID540	0.876469	8.88593	5.44996	-0.10995	88.2794	25.524	1.06757	23.0621	7.72874	36.6115	7.3547	2.80097	4.38945	13.7064	8.50248	93.0205	0.925017	3.53792
NID549	0.882124	8.88332	4.63176	-0.0850176	108.519	25.5182	0.805025	26.8035	7.14556	28.2711	4.76112	2.31374	5.08765	18.4502	9.54236	125.963	0.917206	4.52398
NID551	0.903294	8.91539	4.70713	-0.0689278	104.3	31.8182	0.824543	30.3999	7.55552	35.1278	6.90056	2.74015	3.97633	16.7419	10.2369	109.677	0.919462	4.57464
NID553	0.852185	6.137	4.40392	-0.0599797	73.3159	31.5187	1.03699	28.4241	8.00131	38.1431	7.60121	2.79557	7.04053	19.7387	9.35462	118.708	0.928949	7.76201
NID555	0.886322	8.96328	3.14103	-0.0632774	90.46	22.9373	0.736927	33.5368	7.6982	33.8415	6.20628	2.55207	5.49346	14.5901	13.6289	91.9594	0.929305	3.26901
NID556	0.890673	8.94966	7.72574	0.458159	88.3836	22.0803	0.572156	29.0302	7.58448	32.4021	5.81673	2.48183	4.20897	14.5006	15.0659	88.9801	0.926098	2.35321
NID557	0.889034	8.74152	1.39251	-0.0498745	115.265	22.3146	1.102	14.118	8.25451	41.6877	8.94899	3.06006	6.47524	17.0911	6.91264	129.299	0.927405	6.99835
NID558	0.88618	9.00223	5.96442	-0.0397521	89.2665	22.576	0.828	30.3522	7.63035	33.8399	6.34208	2.59745	3.95982	13.4624	13.7597	66.4256	0.933411	1.8063
NID559	0.187109	1.50971	4.37017	-0.0681724	86.8221	22.4746	0.832231	35.5971	7.93453	38.9231	8.07188	2.85546	5.62151	18.0475	9.24143	115.427	0.931632	5.65135
NID568	0.90458	8.94332	5.8628	-0.0600586	105.532	23.5056	0.751131	24.7334	7.67495	33.7305	6.30531	2.56022	4.76991	15.1268	13.7991	92.8539	0.927394	4.36549
NID592	0.873906	4.69985	8.61203	0.83184	97.4384	40.275	0.863671	22.8087	8.14423	38.8369	7.82285	2.76745	5.70416	21.1652	7.71856	156.036	0.919649	6.26904
NID599	0.879905	7.82472	2.50857	-0.0651424	84.4223	24.1342	0.753091	27.4832	8.40459	40.599	8.25968	2.83195	3.71578	14.2459	11.8699	75.6725	0.91545	4.17745
NID600	0.874765	4.18104	4.95341	-0.0433232	92.1387	41.4102	0.965913	36.1098	7.66335	34.5424	6.68214	2.70826	6.74065	20.722	7.2343	123.753	0.914241	5.94605
NID602	0.886546	8.88444	4.92213	-0.0553738	95.3482	26.338	0.860625	32.8192	8.13813	37.51	7.25515	2.69507	6.22958	15.6136	9.04444	102.887	0.926879	3.29909
NID604	0.87039	4.96399	4.55945	0.192908	111.066	33.1894	0.953703	27.8806	7.32839	36.556	7.73906	2.91617	8.51404	26.3275	4.44357	164.665	0.918153	9.13965
NID605	0.890361	1.19489	6.06383	-0.0463603	103.81	24.6883	0.956219	31.7939	8.91017	37.7105	6.74835	2.48066	6.36801	18.5551	5.40826	158.277	-0.0504144	4.89025
NID607	0.880955	9.09493	8.16676	-0.0122377	87.5485	36.7544	0.91036	30.5506	7.49987	36.574	7.58795	2.87478	5.21865	14.8482	9.34146	97.6204	0.932979	3.4713
NID445	0.856511	9.07301	7.26819	-0.0479868	62.2528	27.8923	0.914218	30.6525	8.02882	39.8606	8.20401	2.84616	3.20725	12.7642	13.0477	65.7294	0.944171	2.0871
NID451	0.856046	8.82692	4.16273	-0.209078	82.151	40.6728	1.04613	29.9616	8.89715	43.0642	8.8972	2.87999	5.01797	16.9025	9.91689	81.5844	0.980595	4.37283
NID462	0.869761	8.68647	7.81294	-0.0305718	83.4377	19.9205	0.657611	30.3251	7.82542	33.3604	5.97279	2.48607	4.54196	16.2742	14.8028	101.894	0.97216	3.24566
NID492	0.876818	9.0002	6.72452	-0.0345131	94.833	35.9552	0.951756	29.548	7.8789	34.8885	6.55627	2.62582	4.01599	15.3686	6.87624	100.198	0.980639	2.77426
NID538	0.884284	9.02326	6.038	-0.0361615	94.848	31.6235	0.872918	30.9291	7.78201	34.5978	6.48376	2.62751	5.17834	16.3311	9.23771	97.7729	0.980628	2.64358
NID665	0.409556	1.22658	3.59669	-0.047983	104.987	23.1772	0.76603	30.714	7.34474	31.4268	5.70242	2.51946	5.0394	14.4475	14.0061	75.0467	0.990992	5.63438
NID666	0.866634	9.01979	6.62267	-0.0358345	80.9616	24.0591	0.868933	30.5421	7.72046	33.233	6.01944	2.49039	4.61942	15.4764	13.5606	81.2404	0.97839	2.3872
NID669	0.860935	8.84016	2.48477	0.348758	97.5541	30.3459	0.893771	26.2709	7.87197	42.646	9.73058	3.16494	4.35325	16.3135	8.18276	133.029	0.97376	3.88001
NID673	0.866939	7.1794	6.70388	-0.0286659	91.0356	34.6893	0.942926	30.4272	7.70095	44.5919	10.9322	3.41449	5.97688	19.1734	8.76892	107.763	0.972906	3.97633
NID676	0.875372	1.31394	0.794314	-0.0429975	116.689	37.6575	0.930173	30.687	7.83318	44.9722	10.968	3.44733	7.42362	19.8694	6.18178	108.747	0.0175027	4.83204
NID681	0.866269	9.05615	6.48326	-0.023404	107.67	25.8835	0.716019	30.0332	7.527	34.1929	6.53075	2.69147	4.5586	15.5742	16.3388	70.7605	0.986331	2.60993
NID682	0.875623	8.50111	6.705	0.0760375	103.154	21.5482	0.911839	27.5294	7.70881	34.7501	6.73971	2.66622	5.15713	15.9231	9.19733	135.128	0.864357	3.86838
NID683	0.870094	8.94862	4.6953	-0.0220379	92.9733	47.1836	0.938831	30.3745	8.339	35.4107	6.33587	2.51138	5.60663	18.9614	9.61127	97.2892	0.981687	4.24858
NID685	0.848971	8.76713	2.91558	-0.0688399	83.9077	29.9366	0.943875	31.2326	7.73478	36.0845	7.00038	2.69871	6.18372	18.3343	10.125	89.4538	0.950488	3.86038
NID686	0.851268	8.75173	7.32851	-0.0213348	86.3348	34.489	0.904294	28.4185	8.03408	33.5798	5.93283	2.44474	7.55746	21.5551	9.90454	122.156	0.98438	7.24916
NID687	0.852718	1.25616	3.51776	-0.0287336	86.0594	34.1582	0.785728	31.1684	7.44215	36.5542	7.52784	2.86304	5.64823	18.7548	12.4242	94.8687	0.966373	4.86282
NID691	0.8692	9.04215	7.64035	-0.0298284	83.3251	38.5927	0.905342	30.4344	8.21872	37.5582	7.21315	2.68964	5.24506	18.5951	11.9386	89.5153	0.980437	4.93545
NID701	0.886074	8.4826	3.14711	-0.0628552	90.8881	17.4357	0.598083	29.1047	7.91757	36.7054	7.0665	2.64332	3.85068	14.9528	13.0729	110.453	0.201396	3.81917
NID702	0.846853	8.89669	8.91127	0.84758	80.6444	32.185	0.879675	29.2146	8.54341	37.1378	6.71751	2.5198	5.00114	17.6568	11.1781	106.892	0.975317	5.1132
NID707	0.860828	6.55387	6.12545	0.271424	89.136	30.0218	0.867361	30.1273	7.33813	33.1257	6.2766	2.63989	4.91225	14.4498	9.63842	120.805	0.973236	3.91353
NID708	0.740032	7.9492	2.84806	-0.0563435	84.0137	20.9074	0.687913	30.6337	7.12057	31.0945	5.70111	2.53537	4.77404	13.1206	10.1679	107.357	0.822685	3.79287
NID710	0.865112	8.96995	6.61916	-0.0349171	91.6642	22.6945	0.962231	29.9598	7.29895	35.3177	7.19402	2.8485	5.82969	16.9573	8.79283	124.353	0.980659	4.35122
NID711	0.855762	9.1164	8.50128	-0.018012	85.7869	26.3844	0.9814	29.7486	7.40745	36.0937	7.39176	2.83439	5.01215	18.1365	8.75827	108.785	0.880768	3.39056
NID715	0.85015	8.97226	7.23543	-0.0559411	92.5205	24.9201	0.77088	30.3731	8.23514	32.103	5.24883	2.25939	5.48022	15.9174	12.8377	86.5977	0.939715	4.27426
NID716	0.863454	9.0161	4.13656	-0.0304549	90.3719	31.6561	0.881596	30.0048	7.55645	37.5951	7.75061	2.89126	4.92587	15.6091	14.5618	83.1965	0.984214	3.6796
NID717	0.86429	8.98575	5.74644	-0.0356449	88.8699	27.2939	0.894752	30.2436	7.63167	36.987	7.5155	2.83299	5.83967	16.8999	11.8642	94.6774	0.980873	3.2976
NID719	0.864651	9.14996	8.25489	-0.0136134	68.7543	31.504	0.853846	27.8712	9.1048	43.7379	8.72512	2.74604	3.69832	13.337	13.8896	70.7058	0.977009	2.02488
NID720	0.86014	9.10423	7.84744	-0.0285788	71.5028	20.7836	0.959189	30.0801	9.00106	40.2822	7.50853	2.5909	3.14231	12.6606	15.723	62.3474	0.976335	1.42334
NID721	0.857317	8.17261	5.60609	0.220263	74.3489	37.8592	0.937747	30.3695	8.33866	37.9017	7.21005	2.65125	4.782	16.5662	10.9181	81.7615	0.979734	2.94146
NID722	0.876503	8.99652	3.85792	-0.0364322	95.7612	24.5678	0.826462	30.0691	7.479	34.186	6.48993	2.6546	5.49575	17.1272	15.6418	85.3467	0.982788	3.01801
NID723	0.877522	9.07083	6.62655	-0.0449724	90.2289	23.1609	0.86814	29.9503	7.59887	34.9848	6.72051	2.68439	4.76312	16.8084	17.5494	91.0678	0.986501	2.98074
NID725	0.884217	8.61282	6.65935	-0.0491279	89.8728	29.6945	0.919433	30.2987	7.97991	33.7262	5.91971	2.45513	5.65525	15.4845	10.6517	81.523	0.991439	3.84648
NID736	0.874567	9.01631	5.93599	-0.0447823	85.8064	25.5029	0.791286	30.2143	7.62158	31.4447	5.47715	2.41639	5.25704	16.9986	15.4365	93.4394	0.97954	2.1112
NID738	0.870975	8.8384	6.92229	0.00522412	91.7712	29.8677	0.81223	30.1418	7.76358	37.1688	7.41622	2.78898	5.619	18.5105	13.4455	103.22	0.974222	3.25114
NID741	0.872463	9.00705	7.57609	-0.0147483	82.5549	20.5577	0.937718	30.0236	7.83455	34.4251	6.38397	2.58255	4.59626	13.7796	15.7609	58.4401	0.975067	2.66202
NID743	0.856397	9.02745	7.24966	-0.0147699	69.0538	27.7872	0.775547	30.8491	8.27802	40.6605	8.29819	2.83029	3.07301	11.4792	13.0619	62.7655	0.929929	2.25109
NID746	0.873889	8.86096	5.46974	-0.000765102	91.302	38.1497	0.78639	30.4267	7.60773	30.5564	5.13667	2.3764	6.48394	20.6934	13.2333	117.411	0.971952	4.29121
NID751	0.864869	7.17916	7.52379	0.00683702	94.4511	22.0975	0.917793	30.0957	7.43273	39.6032	8.92109	3.12203	6.10982	18.7427	7.82186	139.164	0.942282	4.26418
NID757	0.871023	8.96257	7.54158	-0.0030253	94.7092	28.4665	0.700106	30.5506	7.73021	32.616	5.77615	2.48477	5.25292	17.2035	17.2195	90.0687	0.970204	1.75277
NID759	0.868487	8.78207	8.26741	0.0190912	93.3819	38.4284	1.017	22.8067	7.78957	31.2897	5.25904	2.32218	6.73184	21.9055	6.46796	147.99	0.963188	7.29964
NID760	0.867123	8.98772	7.53342	-0.00612509	77.0603	21.6636	0.813032	30.5867	7.11668	26.7843	4.21431	2.18374	4.25223	13.3281	15.9502	70.282	0.975081	3.71472
NID762	0.854106	8.93435	1.86837	-0.0161253	99.8534	22.1459	0.757016	30.1863	7.3458	40.5771	9.52645	3.29088	4.1859	13.4464	13.2772	86.0931	0.931256	1.48153
NID704	0.57669	1.70694	4.51431	-0.0503659	83.3978	23.2874	0.884392	32.0801	7.89991	37.7639	7.52392	2.79506	5.10853	14.9885	7.53891	71.6224	0.683176	4.37392

## Sheet: CU (BLUEs)
NSFTV_ID	DTHD	FLFLG	AWNPLU	AWN_BINARY	SDSH_BINARY	PNLG	PNNB	CULM_ANGLE	STOLON_BINARY	PTHT	PERICARPCOL_BINARY	CUNO	HULCL	STEMCOL_BINARY	SEED_S2_BAG	SEED_S2_NONBAG
NID401	83.1469	34.9396	8.95261	1.036	1.0048	24.1439	4.30473	5.18767	0.423484	107.279	0.953922	5.94764	8.03384	1.01383	5.09567	4.08397
NID402	87.0985	38.6554	1.34206	1.02868	0.974939	22.3872	4.81055	3.66097	0.784632	92.7959	0.998678	3.73103	7.93482	-0.0504122	11.8491	12.0508
NID407	141.819	31.1171	0.227675	0.0221883	1.00285	24.4286	1.55995	5.28369	0.904738	114.445	0.715759	7.66156	3.16393	0.0308135	1.79883	-0.453394
NID410	74.9724	21.3204	9.02968	1.02304	0.998805	14.9751	8.85869	5.59238	0.00356959	71.9279	0.954377	6.9312	8.05196	1.0118	11.8629	7.03783
NID413	70.2172	20.2169	6.55394	1.03463	1.01346	15.1523	7.43284	5.4739	0.425947	76.1495	0.953807	5.0852	7.93621	1.00509	11.1082	11.8885
NID415	69.6903	26.529	8.93512	1.03296	1.01698	14.8905	5.51506	4.12883	0.345403	76.1606	0.954808	4.14595	7.98839	1.00767	10.5247	11.2096
NID416	93.7404	30.2777	0.0185229	0.0468041	0.0205611	19.6195	6.34817	2.90597	0.929316	97.5164	-0.0448538	6.22026	2.78171	0.0256198	9.20786	6.89179
NID420	91.029	23.9004	4.97679	1.02455	0.987205	21.6914	5.26028	3.82	0.738655	106.387	0.811617	7.30562	3.03187	0.975635	4.15296	3.61822
NID427	95.376	49.3665	8.10724	1.02906	1.00271	21.8421	3.86328	5.61381	0.13361	93.9703	0.95368	5.45873	7.92672	1.00185	4.33476	3.09263
NID428	74.485	19.2012	7.42742	0.978974	0.995833	13.7656	7.70744	7.41584	0.295876	86.3448	0.884475	4.64341	8.1409	0.992763	10.4193	7.25055
NID429	119.172	32.1066	5.37204	0.899306	0.959187	19.1903	2.57122	4.0335	0.655515	94.0345	0.845735	8.70869	5.2862	1.08257	2.02988	0.952344
NID430	83.4695	39.1362	4.99293	0.898359	0.837771	27.4767	3.74006	3.57793	0.817849	112.377	0.671928	5.45484	6.5224	0.131279	6.23732	6.10203
NID431	109.308	33.6746	8.60926	0.984344	0.989629	20.9934	3.02195	4.00013	0.795042	102.814	0.928948	6.04917	7.75671	1.09072	6.33859	2.83814
NID432	121.126	29.4289	7.19729	0.969491	1.03999	16.9797	2.69324	3.91796	0.688685	118.393	0.750363	6.77217	3.07995	0.967286	2.95464	1.54761
NID433	126.224	40.7384	6.05921	1.03126	0.950397	22.9119	2.49187	6.37745	0.505473	93.7127	0.678959	6.44535	7.83648	1.00445	2.20335	2.84657
NID435	95.7026	22.1907	7.88303	0.971136	1.03414	22.1585	2.29837	3.46254	0.839244	113.93	0.162647	3.9851	4.50237	0.985946	2.07561	1.19196
NID437	129.348	25.2954	7.09185	0.973528	1.0279	14.7978	1.89721	7.04985	0.109909	83.4593	0.81501	8.51641	5.90383	1.01721	1.82347	0.957161
NID438	91.9316	28.3097	5.39563	0.961776	1.03499	17.612	5.42039	4.39298	-0.0569264	68.5816	1.16068	9.59098	6.01104	1.00495	2.5612	3.209
NID442	59.8475	26.4687	8.42834	1.01893	1.00682	13.8839	7.17691	5.77176	0.0337206	64.9693	0.952921	4.70431	7.96152	1.01904	16.0888	12.6557
NID443	69.4967	25.2274	8.9974	1.02466	1.00181	13.6043	7.60618	5.14707	0.478686	68.3581	0.953122	6.10779	8.00598	1.01138	7.99297	9.3991
NID444	61.6719	29.9863	8.9497	1.02838	1.00485	14.9889	4.90474	4.84098	0.035186	72.0852	0.953548	3.9373	7.98559	1.01664	13.3978	9.61853
NID445	56.6671	31.6642	8.95615	1.03832	1.01361	15.5718	7.988	4.67712	0.0417205	86.479	0.954165	5.09889	8.05689	1.0107	10.9344	10.4267
NID446	75.7177	21.461	7.44517	1.0225	1.01812	13.0762	5.64655	3.76265	0.156727	64.8576	0.953038	4.03252	7.90873	1.00823	9.18361	10.0908
NID449	81.7578	25.5083	8.93578	1.02976	1.01023	18.2769	8.19815	6.10752	0.0103943	78.0495	0.954599	6.64687	7.93213	1.01132	13.0763	8.33065
NID450	72.3041	21.9345	8.93574	1.02635	1.00618	23.2727	9.79646	5.6401	0.0140424	83.7037	0.954808	10.4425	8.07423	1.0078	10.6811	9.53048
NID451	64.8999	39.9186	8.77468	1.02684	1.00205	13.4034	6.4323	4.78284	0.011876	61.2146	0.954453	4.58768	2.46371	0.998804	10.3638	10.8194
NID453	111.759	36.0447	1.22691	0.964132	1.05935	20.0777	2.87182	2.68103	0.235068	101.471	0.163378	6.64578	3.2825	0.994054	4.34175	3.08788
NID454	77.8346	44.8688	3.51894	0.972534	0.966201	17.3206	5.42188	3.5919	0.212992	85.4412	-0.068706	5.97848	7.77513	0.108213	8.52531	6.93241
NID456	90.3045	32.0695	5.22367	0.851195	0.784878	21.7402	5.56262	3.74546	0.0714041	93.3668	0.687235	6.63573	6.19414	0.025402	7.99037	7.27628
NID457	75.6021	22.9156	8.69188	1.0168	0.0719698	17.3433	6.29027	4.0958	0.458701	95.3274	0.956109	5.68273	3.39828	0.998833	6.92448	6.91848
NID458	162.521	33.0017	3.90338	0.951922	0.976796	19.585	3.64129	3.65146	0.00873462	67.3149	-0.0708707	8.85673	2.14125	0.133774	5.39562	3.60694
NID460	116.03	33.1227	5.75542	0.941879	0.13092	21.651	3.19145	5.2235	0.481662	102.756	0.665975	5.61551	7.44588	0.0292777	8.60986	7.04257
NID461	80.4024	26.744	1.89211	1.02551	1.00597	24.1938	7.00628	4.08599	0.609572	107.665	0.95271	5.74209	5.3861	0.985684	5.48069	4.94597
NID463	124.735	30.2412	8.73714	1.02526	1.01082	17.4819	4.81364	6.59354	0.0384256	81.7644	0.954355	8.28932	3.48007	1.01224	4.54329	5.41751
NID465	80.051	34.4075	7.94286	1.0336	1.00815	22.5575	4.41497	3.78748	0.082551	122.465	0.953394	5.81145	8.06159	0.0306219	4.07037	3.69053
NID467	132.571	37.523	8.6898	0.976186	0.984403	24.6577	4.45514	6.62982	0.0687132	119.475	0.930376	8.31053	6.6994	1.07663	3.57124	1.68986
NID469	122.938	32.3785	8.66038	0.97721	0.982982	19.5794	4.16033	6.33861	0.101307	95.2642	0.930265	9.96104	7.77457	1.07322	2.21863	2.28901
NID472	72.1099	25.6875	6.96609	1.02365	1.00548	17.1417	7.09678	3.73442	0.272272	95.1877	-0.045919	8.33636	7.9815	0.0227592	6.47615	8.71771
NID477	75.7894	35.2011	0.374703	0.371507	0.96575	22.2746	2.5325	2.6265	0.213854	91.5904	0.998454	2.87691	2.23055	-0.0452801	10.9254	8.075
NID481	73.3799	26.6119	8.83066	1.02369	1.00395	17.204	7.0168	4.98433	0.182257	78.4521	0.952837	6.53138	8.05759	0.0319246	9.09083	12.098
NID482	76.1887	30.9569	6.90978	1.03039	1.01897	19.1676	6.41601	5.29902	0.262848	88.614	0.95447	6.98453	7.99017	1.01299	12.4133	10.7234
NID483	70.5858	30.1044	1.63481	1.02606	1.01283	16.3032	6.26572	3.76496	0.664685	84.0409	0.953225	6.6823	6.83894	1.00412	7.70861	10.149
NID484	122.736	28.4571	9.11259	1.01571	0.945644	18.1227	4.84365	7.55619	0.0746651	84.6335	0.943903	9.63989	6.39263	0.962846	3.49356	2.69026
NID487	119.659	20.6689	5.52248	1.00137	0.997546	13.7435	3.34989	7.01149	0.0924013	78.2299	0.9438	6.88608	7.71859	0.971594	6.43862	3.68455
NID488	94.7746	46.0554	8.19316	1.0328	0.0265763	23.3986	4.29544	3.52259	0.700096	102.785	0.952853	5.03212	8.09369	0.021468	14.2973	11.4951
NID490	109.237	41.0731	8.22351	1.01976	0.989789	20.1828	1.97551	5.46256	0.593632	95.8593	0.774135	7.112	7.45586	0.954507	2.68809	1.67302
NID492	176.336	35.9468	8.67582	1.02624	1.03291	18.8355	3.14735	5.9709	-0.00930938	76.9318	0.955452	8.26047	7.67227	1.01653	7.83716	3.37624
NID493	51.6883	34.3713	8.93095	1.03309	1.00567	16.4771	4.68443	2.62358	0.0202009	83.7917	0.95329	3.54758	7.97867	1.01426	13.1919	5.89101
NID494	141.669	35.7875	2.4934	0.959562	1.07505	17.8509	1.69426	5.97704	0.527088	68.5127	0.993022	8.32799	7.09114	0.996239	3.77793	2.79365
NID495	96.0787	19.5579	8.85505	1.02225	1.01456	13.6079	6.67713	7.23657	0.254044	96.7577	0.955572	6.0286	7.96957	1.00611	14.0504	8.78624
NID496	81.2791	31.0583	9.05814	0.985437	0.971107	20.8677	5.47537	7.70481	0.110223	96.2768	0.934095	5.6648	8.00139	0.591146	4.56326	5.68286
NID498	95.2066	26.5373	9.14827	0.965401	1.01277	21.0273	5.98226	6.84417	0.247041	79.1017	1.161	6.93337	8.12797	0.999656	6.81654	5.31045
NID499	91.7332	38.0957	8.89156	1.03601	1.00845	20.2918	5.66138	6.11942	0.0799827	113.18	0.95451	6.74083	8.04407	1.00337	4.5652	5.17624
NID501	75.9777	23.7384	8.9799	1.03106	1.01809	15.5099	9.40976	6.9985	0.0187113	84.834	0.955086	5.84369	8.01083	1.00644	12.6193	7.11903
NID503	142.552	26.8668	6.34012	1.04252	1.0254	29.685	3.62109	5.23845	0.35984	93.6504	0.662889	7.58501	7.552	0.0333003	2.36299	4.79625
NID505	143.973	28.5803	1.07996	1.01277	1.02096	16.9423	2.41024	3.98334	0.886298	92.6625	0.956314	8.90739	2.24125	1.01004	2.09222	0.726809
NID506	101.137	39.4957	5.60727	1.01009	0.986832	23.6041	3.58021	4.56741	0.286374	82.4556	0.943278	5.84478	7.83005	0.95077	8.18134	8.91795
NID508	150.511	24.899	0.15918	0.0453798	0.576928	16.1327	2.85601	4.68132	0.079059	76.0655	0.956317	8.97635	1.98426	1.01428	5.01907	1.19541
NID509	71.7959	22.4352	0.284516	0.0678962	0.992604	20.0925	7.28806	4.08828	0.892137	98.8255	-0.0470307	5.14748	4.17353	0.981814	7.55114	6.41063
NID514	84.1725	21.1818	8.85628	1.02691	1.0263	17.1536	3.17525	5.12457	0.595454	98.0024	0.955585	7.20737	7.88684	1.01688	0.328458	1.75632
NID523	79.9402	32.5827	9.03751	1.02942	0.977543	19.4399	7.77283	6.25543	0.111627	84.9207	0.996426	4.99923	8.09104	0.939789	11.1812	6.27999
NID538	174.339	34.1645	8.69204	0.976219	0.982337	18.9015	5.12674	6.94272	-0.0214555	81.1225	0.931697	8.62471	7.74006	1.10195	13.5076	4.15861
NID549	98.7786	26.4031	5.90306	1.03284	0.974636	21.4193	4.66591	5.55847	0.71025	100.818	0.997703	8.61953	7.99746	0.928665	5.76617	4.09351
NID551	133.883	29.7183	7.04428	1.02359	1.03882	16.7683	3.28163	4.63927	0.110844	87.8014	0.999491	9.10276	2.89003	0.931789	3.03228	0.503525
NID553	82.4165	36.0317	4.9129	1.0248	0.97776	25.6624	5.07623	4.72774	0.185163	96.3169	-0.0020088	4.87813	4.5618	0.915212	9.80039	7.42205
NID555	69.4019	33.7668	8.91057	1.03927	0.968478	19.0452	6.74485	4.6906	0.124712	87.2731	0.996209	6.38268	8.10138	0.938141	11.4544	6.0776
NID568	110.997	32.1368	8.8733	1.01787	0.981261	19.3353	4.69943	4.75716	0.299349	81.4706	0.939738	6.41917	7.87018	0.309557	4.28412	3.56657
NID592	151.045	38.1011	4.53816	0.978086	0.981754	26.4238	2.29558	3.76512	0.868381	117.415	0.929885	5.00003	2.42291	1.06042	4.52201	1.67814
NID600	89.059	29.8924	1.58806	1.00378	0.284125	20.3343	4.9029	3.07953	0.35967	98.7615	0.995781	5.80106	3.24707	0.907804	11.0515	10.9013
NID602	91.4271	43.763	8.98522	1.02781	0.976032	15.9978	5.67993	4.72878	0.0526283	69.9148	0.998516	8.27234	8.17379	0.935337	6.60125	5.16627
NID605	89.7002	29.2093	1.17458	1.01414	0.0686861	23.7504	4.36122	3.29267	0.733358	116.044	-0.0048645	3.83573	2.25975	-0.0750121	10.4776	14.9016
NID665	84.0319	30.4183	0.0433745	0.0401463	-0.0110986	24.1045	6.74337	2.63353	0.395019	108.997	0.997283	6.8668	3.17919	-0.0631528	11.3262	7.28223
NID666	86.638	24.4712	8.93691	0.982007	0.979064	19.0669	6.35576	5.14124	-0.035572	74.2005	0.930694	9.01225	7.98069	1.08562	5.7178	5.7417
NID669	92.079	25.1682	2.00393	1.01646	1.01869	16.0317	3.96176	3.78521	0.701038	102.523	0.914512	7.9223	7.36386	0.933066	3.63852	1.86318
NID673	87.8996	34.4591	1.51864	1.00855	0.969138	22.3117	2.99453	3.66366	0.626625	104.424	0.999643	4.67427	2.65857	-0.0501697	5.13748	6.4035
NID676	143.063	33.7192	-0.0909478	0.0473196	0.00376209	22.9931	3.77347	2.1114	0.151225	104.401	-0.00259208	7.09658	4.20449	0.600824	17.0227	4.34338
NID682	102.456	26.6468	8.72606	0.980431	0.00936685	17.8128	4.14239	3.06957	0.798903	106.646	0.931656	5.94839	7.64512	1.07992	7.14135	5.03804
NID683	82.9472	33.2503	9.00527	1.0336	0.975027	18.581	6.88919	5.83064	0.114906	76.1375	0.996233	5.04246	8.03831	0.926957	11.2797	8.12946
NID685	96.1178	39.6972	8.8954	1.02545	0.970397	24.3382	3.55678	5.70765	0.130238	86.176	-0.000806558	4.42366	5.22669	0.931883	8.32206	5.96812
NID686	76.007	27.3964	7.05639	0.976275	0.950385	20.3022	7.76209	5.80905	0.722713	98.9495	0.929709	6.31073	7.81432	0.144777	5.23447	5.37415
NID687	90.0336	32.8233	0.0924436	0.035515	0.962111	19.5828	4.89223	3.69733	0.517569	85.6989	0.997775	7.55853	2.21422	0.910148	2.66306	3.15938
NID691	78.4541	31.7846	8.58938	1.03621	0.976097	20.7887	5.63107	4.45413	0.13796	84.1672	0.996584	4.85606	8.07087	0.930792	10.7506	8.09098
NID701	72.9564	17.4712	0.189282	0.0488051	0.978407	23.2446	5.95224	4.17149	0.745204	89.5302	-0.00237235	5.15401	2.76857	0.918831	7.7466	6.69074
NID704	71.7348	29.9876	6.39568	0.971913	0.978645	22.205	5.88582	3.47662	0.170677	77.7188	-0.00393459	5.27926	4.08501	0.919976	9.90853	10.7355
NID707	77.0836	23.7838	8.90162	1.03101	0.989098	15.6097	5.06448	5.47498	0.8023	102.6	0.99758	4.55866	8.11535	0.923581	7.96935	9.5069
NID708	72.0322	23.842	8.37463	0.972007	0.971219	12.6386	7.39019	4.29829	0.200707	70.9681	0.930906	6.45235	7.87958	0.125447	4.29458	10.2226
NID711	88.8242	34.2871	6.81292	0.982535	0.962293	18.5849	4.16393	3.98574	0.720934	84.6927	0.931737	4.72044	7.74434	0.153697	9.7606	7.09991
NID715	78.5226	32.138	8.72575	1.03651	0.970585	23.4944	7.30943	4.25868	0.722448	103.156	0.998798	5.22941	8.00058	-0.05947	9.46263	11.4434
NID716	152.199	30.3585	9.04177	1.01486	0.983623	15.5636	4.78613	7.03304	0.0276977	58.2717	0.998249	10.4833	7.90475	0.956763	6.12578	3.56756
NID717	90.9302	26.9509	9.02627	1.02752	0.972078	19.1489	6.47718	6.84714	0.130371	85.4715	0.997214	6.33589	8.06426	0.923855	8.83831	7.3342
NID719	54.5036	37.9902	8.96616	1.0373	0.969108	13.9329	4.91434	2.70913	0.0854946	77.2543	0.999746	3.36212	8.09399	0.945866	10.027	4.26601
NID720	68.7413	27.4575	9.06666	1.02004	0.982437	17.5503	5.70546	4.32656	0.102047	73.2249	0.997759	5.29296	8.05705	0.932211	10.6765	7.5139
NID721	81.0604	55.0593	5.80145	0.971372	0.9662	18.3966	5.96613	4.43467	-0.00689732	73.9759	0.933046	7.99248	7.89111	1.07756	6.73055	8.59054
NID722	80.6864	23.5902	8.94663	1.02225	0.977812	19.4852	6.07279	5.27063	0.106741	77.1299	0.99874	6.98567	8.0307	0.929108	10.5623	9.88904
NID723	79.5845	24.3267	8.96389	1.02951	0.979641	19.1748	4.98315	5.44186	0.135035	86.4851	0.996145	5.7133	8.01964	0.934836	9.58931	8.87339
NID736	91.0549	30.7365	9.38684	1.02643	0.967304	16.1938	4.50852	6.50374	0.076369	65.8355	0.999246	6.22837	7.98726	0.946047	6.14538	5.70078
NID738	100.415	38.8315	8.82316	1.03026	0.980194	19.7467	4.5302	5.88526	0.10302	81.7313	0.99672	7.14888	8.06894	0.926788	5.955	5.79982
NID743	62.2806	26.9261	8.21324	1.03593	0.983458	12.5848	4.65467	3.96048	0.147966	86.597	0.995787	4.36745	8.01418	0.950374	10.3628	6.57949
NID746	85.3751	36.5336	8.66789	1.04568	0.986156	22.9255	4.96233	5.03307	0.190792	109.098	0.997391	4.90429	8.03682	0.925661	12.1229	8.28064
NID751	81.6761	20.281	2.83455	1.02697	0.972228	17.6707	3.51921	4.53727	0.782747	113.273	0.998144	4.3562	2.25181	0.922118	9.80412	5.13975
NID757	84.442	24.8748	8.97055	0.969937	0.970301	16.1242	6.52344	5.95876	0.00210516	82.8931	0.930673	5.59766	7.91385	1.08349	8.01943	5.96517
NID759	78.7511	30.5304	8.20597	1.03268	0.981257	19.1463	5.64686	4.2357	0.553201	105.896	-0.00293929	5.51765	8.00546	0.412557	5.68937	6.07325
NID760	74.276	28.3247	8.74756	1.03324	0.9738	18.951	6.4601	6.09174	0.118298	76.9026	0.9987	5.4395	8.08649	0.940992	8.0901	5.38383
NID762	113.935	27.7465	8.90076	0.970986	0.981372	16.4135	5.12569	6.67146	-0.0384473	64.7057	0.931159	6.70378	6.03367	1.0798	5.91128	6.66479
