# Supplementary material for: Phenotypic Variation and the Impact of Admixture in the Oryza rufipogon Species Complex (ORSC)
Source: Front Plant Sci. 2022 Jun 13;13:787703. doi: 10.3389/fpls.2022.787703 (PMC9235872; doi:10.3389/fpls.2022.787703)
Supplement: Supplementary file 5 [file Table_5.xlsx]

## Sheet: Table5a_IRRI
Supplementary Table 5: Phenotypic trait heritabilities for all traits evaluated at each location. This included (A) 44 traits evaluated at the International Rice Research Institute (IRRI), Los Baños, Laguna, Philippines, (B) 18 traits at the Dale Bumpers National Rice Research Center (DB), Stuttgart, Arkansas, USA, and (C) 16 traits at Cornell University (CU), Ithaca, New York USA.
Descriptive trait name	Trait acronym (IRRI)	H2	h2 M
Penultimate (2nd) leaf length	2LLT	0.57 (0.47, 0.65)	0.07 (0.03, 0.13)
Penultimate (2nd) leaf width	2LWD	0.74 (0.67, 0.79)	0.26 (0.19, 0.34)
Anther length	ANTLT	0.89 (0.86, 0.91)	0.64 (0.53, 0.72)
Awn length	AWNLT	0.82 (0.77, 0.87)	0.01 (0.01, 0.03)
Awn presence	AWNPR	0.62 (0.54, 0.70)	0.20 (0.14, 0.26)
Awn width	AWNWD	0.82 (0.77, 0.87)	0.22 (0.14, 0.29)
Basal sheath color	BLSCO	0.37 (0.29, 0.46)	0.05 (0.02, 0.08)
Collar color	COLLCO	0.39 (0.30, 0.48)	0.04 (0.02, 0.07)
Culm diameter	CUDI	0.81 (0.76, 0.85)	0.24 (0.16, 0.33)
Culm habit	CUHABIT	0.57 (0.49, 0.65)	0.16 (0.11, 0.22)
Growth habit	CUHABIT VEG	0.54 (0.46, 0.63)	0.16 (0.11, 0.22)
Culm kneeing ability	CUKNAB	0.62 (0.54, 0.70)	0.19 (0.14, 0.25)
Culm length	CULT	0.80 (0.75, 0.85)	0.01 (0.00, 0.02)
Number of culms per plant	CUNO	0.17 (0.10, 0.26)	0.01 (0.00, 0.01)
Distance of nearest spikelet to the panicle base	DIST	0.79 (0.74, 0.83)	0.33 (0.23, 0.43)
Days to 50% heading	DTHD	0.72 (0.65, 0.79)	0.03 (0.01, 0.06)
Panicle fertility	FERT	0.69 (0.61, 0.75)	0.25 (0.18, 0.34)
Flag leaf attitude	FLAGATT	0.59 (0.49, 0.66)	0.16 (0.11, 0.22)
Flag leaf length	FLFLG	0.58 (0.49, 0.66)	0.10 (0.05, 0.17)
Flag leaf lamina width	FLFWD	0.75 (0.69, 0.80)	0.29 (0.21, 0.36)
Leaf blade anthocyanin color	LBAC	0.49 (0.41, 0.58)	0.13 (0.08, 0.18)
Leaf blade intensity of green color	LBIGC	0.61 (0.52, 0.69)	0.19 (0.13, 0.25)
Leaf blade pubesence on blade surface	LBPBS	0.60 (0.52, 0.68)	0.19 (0.14, 0.26)
Leaf senescence	LEAF	0.52 (0.44, 0.60)	0.14 (0.10, 0.20)
Life cycle	LIFE	0.56 (0.47, 0.63)	0.16 (0.11, 0.21)
Ligule length	LIGLT	0.65 (0.58, 0.72)	0.12 (0.06, 0.19)
Male sterility	MAST	0.65 (0.57, 0.73)	0.22 (0.15, 0.28)
Panicle attitude of primary branches	PAMB	0.60 (0.51, 0.67)	0.19 (0.13, 0.25)
Panicle secondary branching	PAN2BR	0.59 (0.50, 0.67)	0.18 (0.13, 0.24)
Panicle branch number	PANBASE	0.76 (0.69, 0.82)	0.30 (0.22, 0.38)
Panicle arrangement of primary branches	PANBR	0.66 (0.58, 0.73)	0.22 (0.16, 0.28)
Panicle branches and axis color	PANCO	0.63 (0.55, 0.71)	0.20 (0.15, 0.27)
Panicle exsertion	PANEXS	0.53 (0.44, 0.61)	0.14 (0.10, 0.20)
Panicle type	PANTYPE	0.57 (0.49, 0.65)	0.15 (0.10, 0.21)
Panicle length	PNLG	0.74 (0.67, 0.79)	0.19 (0.12, 0.29)
Number of panicles per plant	PNNB	0.16 (0.10, 0.25)	0.01 (0.00, 0.01)
Spikelet length	SPKLT	0.71 (0.64, 0.78)	0.26 (0.19, 0.33)
Spikelet width	SPKWD	0.83 (0.79, 0.87)	0.45 (0.34, 0.55)
Stigma length	STGLT	0.69 (0.62, 0.76)	0.26 (0.19, 0.33)
Sterile lemma length	STLLT	0.72 (0.66, 0.79)	0.27 (0.19, 0.34)
Sterile lemma width	STLWD	0.69 (0.61, 0.75)	0.25 (0.19, 0.33)
Rhizome and stolon formation	STOLON	0.58 (0.50, 0.67)	0.18 (0.12, 0.23)
Style length	STYLT	0.67 (0.59, 0.74)	0.22 (0.15, 0.29)
Number of empty spikelets per panicle	UNFILLED	0.71 (0.65, 0.77)	0.20 (0.14, 0.29)

## Sheet: Table5b_DB
Supplementary Table 5: Phenotypic trait heritabilities for all traits evaluated at each location. This included (A) 44 traits evaluated at the International Rice Research Institute (IRRI), Los Baños, Laguna, Philippines, (B) 18 traits at the Dale Bumpers National Rice Research Center (DB), Stuttgart, Arkansas, USA, and (C) 16 traits at Cornell University (CU), Ithaca, New York USA.
Descriptive trait name	Trait acronym (DB)	H2	h2 M
Awn presence	AWNPLU	0.70 (0.63, 0.76)	0.30 (0.19, 0.42)
Seed shattering	SDSH BINARY	0.69 (0.58, 0.77)	0.29 (0.16, 0.42)
Awn presence	AWN BINARY	0.67 (0.58, 0.74)	0.26 (0.15, 0.37)
Seed volume	HULGRVOL	0.66 (0.58, 0.74)	0.23 (0.13, 0.34)
Seed surface area	HULGRSURFAR	0.66 (0.58, 0.72)	0.24 (0.14, 0.34)
Plant height	PTHT	0.65 (0.58, 0.72)	0.26 (0.16, 0.36)
Days to 50% heading	DTHD	0.64 (0.56, 0.71)	0.26 (0.15, 0.36)
Seed length	HULGRLG	0.59 (0.46, 0.69)	0.19 (0.084, 0.30)
Number of panicles per plant	PNNB	0.54 (0.46, 0.63)	0.18 (0.10, 0.27)
Culm habit	CULM ANGLE	0.54 (0.46, 0.63)	0.19 (0.11, 0.28)
Seed width	HULGRWD	0.53 (0.39, 0.72)	0.12 (0.05, 0.28)
Number of empty spikelets per panicle	UNFILGRNB	0.53 (0.44, 0.61)	0.21 (0.12, 0.29)
Rhizome and stolon formation	STOLON BINARY	0.51 (0.41, 0.60)	0.14 (0.07, 0.21)
Panicle branch number	PBRNB	0.49 (0.41, 0.58)	0.17 (0.10, 0.25)
Panicle length	PNLG	0.48 (0.40, 0.58)	0.17 (0.10, 0.25)
Flag leaf length	FLFLG	0.40 (0.32, 0.50)	0.12 (0.07, 0.19)
Flag leaf lamina width	FLFLWD	0.39 (0.30, 0.48)	0.12 (0.06, 0.18)
Number of total seeds	HULGRCO	0.34 (0.25, 0.44)	0.10 (0.05, 0.16)

## Sheet: Table5c_CU
Supplementary Table 5: Phenotypic trait heritabilities for all traits evaluated at each location. This included (A) 44 traits evaluated at the International Rice Research Institute (IRRI), Los Baños, Laguna, Philippines, (B) 18 traits at the Dale Bumpers National Rice Research Center (DB), Stuttgart, Arkansas, USA, and (C) 16 traits at Cornell University (CU), Ithaca, New York USA.
Descriptive trait name	Trait acronym (CU)	H2	h2 M
Color of the dehulled grain (pericarp color)	PERICARPCOL BINARY	1 (0.999, 1)	0.73 (0.51, 0.88)
Awn presence	AWN BINARY	0.95 (0.92, 0.96)	0.55 (0.36, 0.70)
Basal sheath color	STEMCOL BINARY	0.94 (0.92, 0.96)	0.49 (0.30, 0.65)
Seed shattering	SDSH BINARY	0.94 (0.90, 0.96)	0.48 (0.31, 0.66)
Days to 50% heading	DTHD	0.88 (0.83, 0.92)	0.46 (0.29, 0.60)
Hull color	HULCL	0.87 (0.82, 0.91)	0.50 (0.34, 0.62)
Awn presence	AWNPLU	0.86 (0.80, 0.90)	0.52 (0.37, 0.63)
Panicle length	PNLG	0.72 (0.61, 0.82)	0.28 (0.15, 0.40)
Flag leaf length	FLFLG	0.72 (0.60, 0.82)	0.24 (0.13, 0.37)
Number of culms per plant	CUNO	0.72 (0.62, 0.79)	0.32 (0.19, 0.42)
Seed count of single bag panicle	SEED S2 BAG	0.70 (0.59, 0.78)	0.29 (0.17, 0.40)
Plant height	PTHT	0.69 (0.58, 0.77)	0.29 (0.17, 0.40)
Number of panicles per plant	PNNB	0.69 (0.59, 0.78)	0.28 (0.16, 0.39)
Seed from all remaining panicles that were not bagged	SEED S2 NONBAG	0.68 (0.57, 0.77)	0.30 (0.18, 0.42)
Rhizome and stolon formation	STOLON BINARY	0.66 (0.53, 0.82)	0.20 (0.11, 0.31)
Culm habit	CULM ANGLE	0.56 (0.45, 0.67)	0.20 (0.12, 0.3)
