# Supplementary material for: Phenotypic Variation and the Impact of Admixture in the Oryza rufipogon Species Complex (ORSC)
Source: Front Plant Sci. 2022 Jun 13;13:787703. doi: 10.3389/fpls.2022.787703 (PMC9235872; doi:10.3389/fpls.2022.787703)
Supplement: Supplementary file 6 [file Table_6.xlsx]

## Sheet: Table S6
Supplementary Table 6: Correlation values among phenotypic traits that were the same or similar across two or three datasets as visualized in Supplementary Figure 2. The traits were measured at the International Rice Research Institute (IRRI), Los Baños, Laguna, Philippines; Dale Bumpers National Rice Research Center (DB), Stuttgart, Arkansas, USA; and Cornell University (CU), Ithaca, New York, U…
	Correlation	Trait 1	Trait 2
	-0.017	CULM_ANGLE.CU	CUHABIT.IRRI
	0.122	CULM_ANGLE.DB	CUHABIT.IRRI
	0.219	CULM_ANGLE.DB	CULM_ANGLE.CU
	0.075	CUNO.CU	CUHABIT.IRRI
	0.316	CUNO.CU	CULM_ANGLE.CU
	-0.052	CUNO.CU	CULM_ANGLE.DB
	-0.148	CUNO.IRRI	CUHABIT.IRRI
	-0.067	CUNO.IRRI	CULM_ANGLE.CU
	-0.146	CUNO.IRRI	CULM_ANGLE.DB
	-0.025	CUNO.IRRI	CUNO.CU
	0.03	DTHD.CU	CUHABIT.IRRI
	0.214	DTHD.CU	CULM_ANGLE.CU
	-0.127	DTHD.CU	CULM_ANGLE.DB
	0.594	DTHD.CU	CUNO.CU
	-0.004	DTHD.CU	CUNO.IRRI
	0.193	DTHD.DB	CUHABIT.IRRI
	0.021	DTHD.DB	CULM_ANGLE.CU
	-0.295	DTHD.DB	CULM_ANGLE.DB
	0.377	DTHD.DB	CUNO.CU
	0.02	DTHD.DB	CUNO.IRRI
	0.558	DTHD.DB	DTHD.CU
	0.159	DTHD.IRRI	CUHABIT.IRRI
	0.148	DTHD.IRRI	CULM_ANGLE.CU
	-0.009	DTHD.IRRI	CULM_ANGLE.DB
	0.169	DTHD.IRRI	CUNO.CU
	0	DTHD.IRRI	CUNO.IRRI
	0.377	DTHD.IRRI	DTHD.CU
	0.504	DTHD.IRRI	DTHD.DB
	-0.103	FLFLG.CU	CUHABIT.IRRI
	-0.17	FLFLG.CU	CULM_ANGLE.CU
	-0.048	FLFLG.CU	CULM_ANGLE.DB
	-0.037	FLFLG.CU	CUNO.CU
	0.084	FLFLG.CU	CUNO.IRRI
	0.167	FLFLG.CU	DTHD.CU
	0.046	FLFLG.CU	DTHD.DB
	-0.017	FLFLG.CU	DTHD.IRRI
	-0.153	FLFLG.DB	CUHABIT.IRRI
	-0.243	FLFLG.DB	CULM_ANGLE.CU
	-0.061	FLFLG.DB	CULM_ANGLE.DB
	-0.139	FLFLG.DB	CUNO.CU
	-0.095	FLFLG.DB	CUNO.IRRI
	0.096	FLFLG.DB	DTHD.CU
	-0.075	FLFLG.DB	DTHD.DB
	-0.016	FLFLG.DB	DTHD.IRRI
	0.47	FLFLG.DB	FLFLG.CU
	-0.279	FLFLG.IRRI	CUHABIT.IRRI
	-0.197	FLFLG.IRRI	CULM_ANGLE.CU
	-0.321	FLFLG.IRRI	CULM_ANGLE.DB
	-0.112	FLFLG.IRRI	CUNO.CU
	0.079	FLFLG.IRRI	CUNO.IRRI
	-0.083	FLFLG.IRRI	DTHD.CU
	-0.099	FLFLG.IRRI	DTHD.DB
	-0.307	FLFLG.IRRI	DTHD.IRRI
	0.224	FLFLG.IRRI	FLFLG.CU
	0.273	FLFLG.IRRI	FLFLG.DB
	-0.114	FLFLWD.DB	CUHABIT.IRRI
	-0.244	FLFLWD.DB	CULM_ANGLE.CU
	-0.127	FLFLWD.DB	CULM_ANGLE.DB
	-0.323	FLFLWD.DB	CUNO.CU
	0.011	FLFLWD.DB	CUNO.IRRI
	-0.069	FLFLWD.DB	DTHD.CU
	-0.121	FLFLWD.DB	DTHD.DB
	-0.03	FLFLWD.DB	DTHD.IRRI
	0.353	FLFLWD.DB	FLFLG.CU
	0.452	FLFLWD.DB	FLFLG.DB
	0.088	FLFLWD.DB	FLFLG.IRRI
	-0.208	FLFWD.IRRI	CUHABIT.IRRI
	-0.254	FLFWD.IRRI	CULM_ANGLE.CU
	-0.185	FLFWD.IRRI	CULM_ANGLE.DB
	-0.089	FLFWD.IRRI	CUNO.CU
	0.024	FLFWD.IRRI	CUNO.IRRI
	-0.021	FLFWD.IRRI	DTHD.CU
	-0.063	FLFWD.IRRI	DTHD.DB
	-0.133	FLFWD.IRRI	DTHD.IRRI
	0.198	FLFWD.IRRI	FLFLG.CU
	0.162	FLFWD.IRRI	FLFLG.DB
	0.456	FLFWD.IRRI	FLFLG.IRRI
	0.434	FLFWD.IRRI	FLFLWD.DB
	0.059	PNLG.CU	CUHABIT.IRRI
	-0.205	PNLG.CU	CULM_ANGLE.CU
	-0.239	PNLG.CU	CULM_ANGLE.DB
	-0.022	PNLG.CU	CUNO.CU
	0.153	PNLG.CU	CUNO.IRRI
	0.223	PNLG.CU	DTHD.CU
	0.361	PNLG.CU	DTHD.DB
	0.181	PNLG.CU	DTHD.IRRI
	0.35	PNLG.CU	FLFLG.CU
	0.145	PNLG.CU	FLFLG.DB
	0.05	PNLG.CU	FLFLG.IRRI
	0.08	PNLG.CU	FLFLWD.DB
	0.143	PNLG.CU	FLFWD.IRRI
	-0.004	PNLG.DB	CUHABIT.IRRI
	-0.186	PNLG.DB	CULM_ANGLE.CU
	-0.206	PNLG.DB	CULM_ANGLE.DB
	-0.088	PNLG.DB	CUNO.CU
	0.109	PNLG.DB	CUNO.IRRI
	0.208	PNLG.DB	DTHD.CU
	0.334	PNLG.DB	DTHD.DB
	0.329	PNLG.DB	DTHD.IRRI
	0.296	PNLG.DB	FLFLG.CU
	0.546	PNLG.DB	FLFLG.DB
	0.158	PNLG.DB	FLFLG.IRRI
	0.334	PNLG.DB	FLFLWD.DB
	0.083	PNLG.DB	FLFWD.IRRI
	0.512	PNLG.DB	PNLG.CU
	0.044	PNLG.IRRI	CUHABIT.IRRI
	-0.18	PNLG.IRRI	CULM_ANGLE.CU
	-0.305	PNLG.IRRI	CULM_ANGLE.DB
	0.083	PNLG.IRRI	CUNO.CU
	0.236	PNLG.IRRI	CUNO.IRRI
	0.188	PNLG.IRRI	DTHD.CU
	0.346	PNLG.IRRI	DTHD.DB
	0.404	PNLG.IRRI	DTHD.IRRI
	0.046	PNLG.IRRI	FLFLG.CU
	0.141	PNLG.IRRI	FLFLG.DB
	0.351	PNLG.IRRI	FLFLG.IRRI
	0.001	PNLG.IRRI	FLFLWD.DB
	0.181	PNLG.IRRI	FLFWD.IRRI
	0.416	PNLG.IRRI	PNLG.CU
	0.596	PNLG.IRRI	PNLG.DB
	-0.115	PNNB.CU	CUHABIT.IRRI
	0.182	PNNB.CU	CULM_ANGLE.CU
	0.108	PNNB.CU	CULM_ANGLE.DB
	-0.1	PNNB.CU	CUNO.CU
	-0.061	PNNB.CU	CUNO.IRRI
	-0.615	PNNB.CU	DTHD.CU
	-0.431	PNNB.CU	DTHD.DB
	-0.34	PNNB.CU	DTHD.IRRI
	-0.326	PNNB.CU	FLFLG.CU
	-0.136	PNNB.CU	FLFLG.DB
	0.118	PNNB.CU	FLFLG.IRRI
	-0.175	PNNB.CU	FLFLWD.DB
	0.002	PNNB.CU	FLFWD.IRRI
	-0.268	PNNB.CU	PNLG.CU
	-0.306	PNNB.CU	PNLG.DB
	-0.254	PNNB.CU	PNLG.IRRI
	0.122	PNNB.DB	CUHABIT.IRRI
	0.271	PNNB.DB	CULM_ANGLE.CU
	0.22	PNNB.DB	CULM_ANGLE.DB
	0.076	PNNB.DB	CUNO.CU
	-0.134	PNNB.DB	CUNO.IRRI
	-0.289	PNNB.DB	DTHD.CU
	-0.357	PNNB.DB	DTHD.DB
	-0.344	PNNB.DB	DTHD.IRRI
	-0.244	PNNB.DB	FLFLG.CU
	-0.357	PNNB.DB	FLFLG.DB
	-0.056	PNNB.DB	FLFLG.IRRI
	-0.581	PNNB.DB	FLFLWD.DB
	-0.233	PNNB.DB	FLFWD.IRRI
	-0.283	PNNB.DB	PNLG.CU
	-0.508	PNNB.DB	PNLG.DB
	-0.325	PNNB.DB	PNLG.IRRI
	0.45	PNNB.DB	PNNB.CU
	-0.238	PNNB.IRRI	CUHABIT.IRRI
	-0.077	PNNB.IRRI	CULM_ANGLE.CU
	-0.121	PNNB.IRRI	CULM_ANGLE.DB
	0.034	PNNB.IRRI	CUNO.CU
	0.716	PNNB.IRRI	CUNO.IRRI
	0.118	PNNB.IRRI	DTHD.CU
	0.098	PNNB.IRRI	DTHD.DB
	0.219	PNNB.IRRI	DTHD.IRRI
	0.052	PNNB.IRRI	FLFLG.CU
	-0.014	PNNB.IRRI	FLFLG.DB
	-0.07	PNNB.IRRI	FLFLG.IRRI
	0.163	PNNB.IRRI	FLFLWD.DB
	0.05	PNNB.IRRI	FLFWD.IRRI
	0.06	PNNB.IRRI	PNLG.CU
	0.198	PNNB.IRRI	PNLG.DB
	0.184	PNNB.IRRI	PNLG.IRRI
	-0.21	PNNB.IRRI	PNNB.CU
	-0.278	PNNB.IRRI	PNNB.DB
	0.06	PTHT.CU	CUHABIT.IRRI
	-0.3	PTHT.CU	CULM_ANGLE.CU
	-0.097	PTHT.CU	CULM_ANGLE.DB
	-0.155	PTHT.CU	CUNO.CU
	0.246	PTHT.CU	CUNO.IRRI
	0.084	PTHT.CU	DTHD.CU
	0.354	PTHT.CU	DTHD.DB
	0.333	PTHT.CU	DTHD.IRRI
	0.081	PTHT.CU	FLFLG.CU
	0.125	PTHT.CU	FLFLG.DB
	-0.004	PTHT.CU	FLFLG.IRRI
	0.034	PTHT.CU	FLFLWD.DB
	-0.06	PTHT.CU	FLFWD.IRRI
	0.592	PTHT.CU	PNLG.CU
	0.556	PTHT.CU	PNLG.DB
	0.484	PTHT.CU	PNLG.IRRI
	-0.311	PTHT.CU	PNNB.CU
	-0.355	PTHT.CU	PNNB.DB
	0.193	PTHT.CU	PNNB.IRRI
	0.022	PTHT.DB	CUHABIT.IRRI
	-0.137	PTHT.DB	CULM_ANGLE.CU
	-0.088	PTHT.DB	CULM_ANGLE.DB
	-0.002	PTHT.DB	CUNO.CU
	0.197	PTHT.DB	CUNO.IRRI
	0.328	PTHT.DB	DTHD.CU
	0.462	PTHT.DB	DTHD.DB
	0.57	PTHT.DB	DTHD.IRRI
	0.02	PTHT.DB	FLFLG.CU
	0.21	PTHT.DB	FLFLG.DB
	0.014	PTHT.DB	FLFLG.IRRI
	0.118	PTHT.DB	FLFLWD.DB
	-0.075	PTHT.DB	FLFWD.IRRI
	0.338	PTHT.DB	PNLG.CU
	0.713	PTHT.DB	PNLG.DB
	0.597	PTHT.DB	PNLG.IRRI
	-0.444	PTHT.DB	PNNB.CU
	-0.63	PTHT.DB	PNNB.DB
	0.312	PTHT.DB	PNNB.IRRI
	0.642	PTHT.DB	PTHT.CU
	0.034	CULT.IRRI	CUHABIT.IRRI
	0.032	CULT.IRRI	CULM_ANGLE.CU
	-0.179	CULT.IRRI	CULM_ANGLE.DB
	0.203	CULT.IRRI	CUNO.CU
	0.271	CULT.IRRI	CUNO.IRRI
	0.354	CULT.IRRI	DTHD.CU
	0.492	CULT.IRRI	DTHD.DB
	0.785	CULT.IRRI	DTHD.IRRI
	-0.048	CULT.IRRI	FLFLG.CU
	-0.024	CULT.IRRI	FLFLG.DB
	-0.023	CULT.IRRI	FLFLG.IRRI
	-0.042	CULT.IRRI	FLFLWD.DB
	0.007	CULT.IRRI	FLFWD.IRRI
	0.27	CULT.IRRI	PNLG.CU
	0.448	CULT.IRRI	PNLG.DB
	0.717	CULT.IRRI	PNLG.IRRI
	-0.304	CULT.IRRI	PNNB.CU
	-0.418	CULT.IRRI	PNNB.DB
	0.323	CULT.IRRI	PNNB.IRRI
	0.478	CULT.IRRI	PTHT.CU
	0.694	CULT.IRRI	PTHT.DB
	-0.085	PBRNB.DB	CUHABIT.IRRI
	-0.153	PBRNB.DB	CULM_ANGLE.CU
	-0.338	PBRNB.DB	CULM_ANGLE.DB
	-0.167	PBRNB.DB	CUNO.CU
	0.11	PBRNB.DB	CUNO.IRRI
	0.085	PBRNB.DB	DTHD.CU
	0.261	PBRNB.DB	DTHD.DB
	0.185	PBRNB.DB	DTHD.IRRI
	0.198	PBRNB.DB	FLFLG.CU
	0.39	PBRNB.DB	FLFLG.DB
	0.229	PBRNB.DB	FLFLG.IRRI
	0.439	PBRNB.DB	FLFLWD.DB
	0.184	PBRNB.DB	FLFWD.IRRI
	0.408	PBRNB.DB	PNLG.CU
	0.809	PBRNB.DB	PNLG.DB
	0.476	PBRNB.DB	PNLG.IRRI
	-0.152	PBRNB.DB	PNNB.CU
	-0.518	PBRNB.DB	PNNB.DB
	0.187	PBRNB.DB	PNNB.IRRI
	0.464	PBRNB.DB	PTHT.CU
	0.567	PBRNB.DB	PTHT.DB
	0.382	PBRNB.DB	CULT.IRRI
	0.021	PANBASE.IRRI	CUHABIT.IRRI
	-0.027	PANBASE.IRRI	CULM_ANGLE.CU
	-0.121	PANBASE.IRRI	CULM_ANGLE.DB
	0.119	PANBASE.IRRI	CUNO.CU
	0.09	PANBASE.IRRI	CUNO.IRRI
	0.295	PANBASE.IRRI	DTHD.CU
	0.088	PANBASE.IRRI	DTHD.DB
	0.16	PANBASE.IRRI	DTHD.IRRI
	0.115	PANBASE.IRRI	FLFLG.CU
	-0.019	PANBASE.IRRI	FLFLG.DB
	-0.067	PANBASE.IRRI	FLFLG.IRRI
	-0.018	PANBASE.IRRI	FLFLWD.DB
	0.035	PANBASE.IRRI	FLFWD.IRRI
	0.293	PANBASE.IRRI	PNLG.CU
	0.126	PANBASE.IRRI	PNLG.DB
	0.18	PANBASE.IRRI	PNLG.IRRI
	-0.308	PANBASE.IRRI	PNNB.CU
	-0.168	PANBASE.IRRI	PNNB.DB
	0.06	PANBASE.IRRI	PNNB.IRRI
	0.201	PANBASE.IRRI	PTHT.CU
	0.079	PANBASE.IRRI	PTHT.DB
	0.158	PANBASE.IRRI	CULT.IRRI
	0.081	PANBASE.IRRI	PBRNB.DB
	-0.035	SEED_S2_BAG.CU	CUHABIT.IRRI
	-0.105	SEED_S2_BAG.CU	CULM_ANGLE.CU
	0.031	SEED_S2_BAG.CU	CULM_ANGLE.DB
	-0.483	SEED_S2_BAG.CU	CUNO.CU
	-0.151	SEED_S2_BAG.CU	CUNO.IRRI
	-0.421	SEED_S2_BAG.CU	DTHD.CU
	-0.429	SEED_S2_BAG.CU	DTHD.DB
	-0.38	SEED_S2_BAG.CU	DTHD.IRRI
	-0.046	SEED_S2_BAG.CU	FLFLG.CU
	0.109	SEED_S2_BAG.CU	FLFLG.DB
	0.096	SEED_S2_BAG.CU	FLFLG.IRRI
	0.196	SEED_S2_BAG.CU	FLFLWD.DB
	0.137	SEED_S2_BAG.CU	FLFWD.IRRI
	-0.151	SEED_S2_BAG.CU	PNLG.CU
	-0.14	SEED_S2_BAG.CU	PNLG.DB
	-0.396	SEED_S2_BAG.CU	PNLG.IRRI
	0.513	SEED_S2_BAG.CU	PNNB.CU
	0.177	SEED_S2_BAG.CU	PNNB.DB
	-0.144	SEED_S2_BAG.CU	PNNB.IRRI
	-0.216	SEED_S2_BAG.CU	PTHT.CU
	-0.378	SEED_S2_BAG.CU	PTHT.DB
	-0.431	SEED_S2_BAG.CU	CULT.IRRI
	0.032	SEED_S2_BAG.CU	PBRNB.DB
	-0.277	SEED_S2_BAG.CU	PANBASE.IRRI
	-0.134	SEED_S2_NONBAG.CU	CUHABIT.IRRI
	-0.123	SEED_S2_NONBAG.CU	CULM_ANGLE.CU
	0.057	SEED_S2_NONBAG.CU	CULM_ANGLE.DB
	-0.497	SEED_S2_NONBAG.CU	CUNO.CU
	-0.106	SEED_S2_NONBAG.CU	CUNO.IRRI
	-0.626	SEED_S2_NONBAG.CU	DTHD.CU
	-0.444	SEED_S2_NONBAG.CU	DTHD.DB
	-0.42	SEED_S2_NONBAG.CU	DTHD.IRRI
	-0.085	SEED_S2_NONBAG.CU	FLFLG.CU
	0.029	SEED_S2_NONBAG.CU	FLFLG.DB
	0.195	SEED_S2_NONBAG.CU	FLFLG.IRRI
	0.22	SEED_S2_NONBAG.CU	FLFLWD.DB
	0.18	SEED_S2_NONBAG.CU	FLFWD.IRRI
	-0.128	SEED_S2_NONBAG.CU	PNLG.CU
	-0.168	SEED_S2_NONBAG.CU	PNLG.DB
	-0.308	SEED_S2_NONBAG.CU	PNLG.IRRI
	0.601	SEED_S2_NONBAG.CU	PNNB.CU
	0.141	SEED_S2_NONBAG.CU	PNNB.DB
	-0.183	SEED_S2_NONBAG.CU	PNNB.IRRI
	-0.248	SEED_S2_NONBAG.CU	PTHT.CU
	-0.297	SEED_S2_NONBAG.CU	PTHT.DB
	-0.411	SEED_S2_NONBAG.CU	CULT.IRRI
	0.001	SEED_S2_NONBAG.CU	PBRNB.DB
	-0.327	SEED_S2_NONBAG.CU	PANBASE.IRRI
	0.715	SEED_S2_NONBAG.CU	SEED_S2_BAG.CU
	-0.04	UNFILGRNB.DB	CUHABIT.IRRI
	-0.268	UNFILGRNB.DB	CULM_ANGLE.CU
	-0.358	UNFILGRNB.DB	CULM_ANGLE.DB
	-0.025	UNFILGRNB.DB	CUNO.CU
	0.202	UNFILGRNB.DB	CUNO.IRRI
	0.188	UNFILGRNB.DB	DTHD.CU
	0.396	UNFILGRNB.DB	DTHD.DB
	0.365	UNFILGRNB.DB	DTHD.IRRI
	0.142	UNFILGRNB.DB	FLFLG.CU
	0.272	UNFILGRNB.DB	FLFLG.DB
	0.112	UNFILGRNB.DB	FLFLG.IRRI
	0.277	UNFILGRNB.DB	FLFLWD.DB
	0.131	UNFILGRNB.DB	FLFWD.IRRI
	0.504	UNFILGRNB.DB	PNLG.CU
	0.717	UNFILGRNB.DB	PNLG.DB
	0.613	UNFILGRNB.DB	PNLG.IRRI
	-0.298	UNFILGRNB.DB	PNNB.CU
	-0.555	UNFILGRNB.DB	PNNB.DB
	0.272	UNFILGRNB.DB	PNNB.IRRI
	0.569	UNFILGRNB.DB	PTHT.CU
	0.666	UNFILGRNB.DB	PTHT.DB
	0.554	UNFILGRNB.DB	CULT.IRRI
	0.705	UNFILGRNB.DB	PBRNB.DB
	0.232	UNFILGRNB.DB	PANBASE.IRRI
	-0.328	UNFILGRNB.DB	SEED_S2_BAG.CU
	-0.273	UNFILGRNB.DB	SEED_S2_NONBAG.CU
	-0.156	UNFILLED.IRRI	CUHABIT.IRRI
	-0.167	UNFILLED.IRRI	CULM_ANGLE.CU
	-0.338	UNFILLED.IRRI	CULM_ANGLE.DB
	0.024	UNFILLED.IRRI	CUNO.CU
	0.335	UNFILLED.IRRI	CUNO.IRRI
	0.071	UNFILLED.IRRI	DTHD.CU
	0.176	UNFILLED.IRRI	DTHD.DB
	0.164	UNFILLED.IRRI	DTHD.IRRI
	0.059	UNFILLED.IRRI	FLFLG.CU
	0.072	UNFILLED.IRRI	FLFLG.DB
	0.407	UNFILLED.IRRI	FLFLG.IRRI
	0.108	UNFILLED.IRRI	FLFLWD.DB
	0.402	UNFILLED.IRRI	FLFWD.IRRI
	0.428	UNFILLED.IRRI	PNLG.CU
	0.38	UNFILLED.IRRI	PNLG.DB
	0.656	UNFILLED.IRRI	PNLG.IRRI
	-0.137	UNFILLED.IRRI	PNNB.CU
	-0.231	UNFILLED.IRRI	PNNB.DB
	0.251	UNFILLED.IRRI	PNNB.IRRI
	0.321	UNFILLED.IRRI	PTHT.CU
	0.334	UNFILLED.IRRI	PTHT.DB
	0.464	UNFILLED.IRRI	CULT.IRRI
	0.375	UNFILLED.IRRI	PBRNB.DB
	0.218	UNFILLED.IRRI	PANBASE.IRRI
	-0.279	UNFILLED.IRRI	SEED_S2_BAG.CU
	-0.104	UNFILLED.IRRI	SEED_S2_NONBAG.CU
	0.524	UNFILLED.IRRI	UNFILGRNB.DB
	-0.033	FERT.IRRI	CUHABIT.IRRI
	-0.053	FERT.IRRI	CULM_ANGLE.CU
	0.258	FERT.IRRI	CULM_ANGLE.DB
	-0.265	FERT.IRRI	CUNO.CU
	-0.199	FERT.IRRI	CUNO.IRRI
	-0.253	FERT.IRRI	DTHD.CU
	-0.344	FERT.IRRI	DTHD.DB
	-0.327	FERT.IRRI	DTHD.IRRI
	0.022	FERT.IRRI	FLFLG.CU
	0.044	FERT.IRRI	FLFLG.DB
	-0.013	FERT.IRRI	FLFLG.IRRI
	0.035	FERT.IRRI	FLFLWD.DB
	-0.045	FERT.IRRI	FLFWD.IRRI
	-0.475	FERT.IRRI	PNLG.CU
	-0.312	FERT.IRRI	PNLG.DB
	-0.605	FERT.IRRI	PNLG.IRRI
	0.224	FERT.IRRI	PNNB.CU
	0.188	FERT.IRRI	PNNB.DB
	-0.174	FERT.IRRI	PNNB.IRRI
	-0.323	FERT.IRRI	PTHT.CU
	-0.347	FERT.IRRI	PTHT.DB
	-0.5	FERT.IRRI	CULT.IRRI
	-0.199	FERT.IRRI	PBRNB.DB
	-0.225	FERT.IRRI	PANBASE.IRRI
	0.509	FERT.IRRI	SEED_S2_BAG.CU
	0.363	FERT.IRRI	SEED_S2_NONBAG.CU
	-0.492	FERT.IRRI	UNFILGRNB.DB
	-0.751	FERT.IRRI	UNFILLED.IRRI
	-0.108	SPKWD.IRRI	CUHABIT.IRRI
	-0.217	SPKWD.IRRI	CULM_ANGLE.CU
	-0.083	SPKWD.IRRI	CULM_ANGLE.DB
	-0.315	SPKWD.IRRI	CUNO.CU
	-0.254	SPKWD.IRRI	CUNO.IRRI
	-0.24	SPKWD.IRRI	DTHD.CU
	-0.32	SPKWD.IRRI	DTHD.DB
	-0.389	SPKWD.IRRI	DTHD.IRRI
	0.001	SPKWD.IRRI	FLFLG.CU
	0.107	SPKWD.IRRI	FLFLG.DB
	0.256	SPKWD.IRRI	FLFLG.IRRI
	0.237	SPKWD.IRRI	FLFLWD.DB
	0.286	SPKWD.IRRI	FLFWD.IRRI
	-0.2	SPKWD.IRRI	PNLG.CU
	-0.217	SPKWD.IRRI	PNLG.DB
	-0.325	SPKWD.IRRI	PNLG.IRRI
	0.156	SPKWD.IRRI	PNNB.CU
	0.046	SPKWD.IRRI	PNNB.DB
	-0.203	SPKWD.IRRI	PNNB.IRRI
	-0.27	SPKWD.IRRI	PTHT.CU
	-0.308	SPKWD.IRRI	PTHT.DB
	-0.442	SPKWD.IRRI	CULT.IRRI
	-0.138	SPKWD.IRRI	PBRNB.DB
	-0.246	SPKWD.IRRI	PANBASE.IRRI
	0.382	SPKWD.IRRI	SEED_S2_BAG.CU
	0.378	SPKWD.IRRI	SEED_S2_NONBAG.CU
	-0.359	SPKWD.IRRI	UNFILGRNB.DB
	-0.097	SPKWD.IRRI	UNFILLED.IRRI
	0.319	SPKWD.IRRI	FERT.IRRI
	0.004	HULGRWD.DB	CUHABIT.IRRI
	-0.239	HULGRWD.DB	CULM_ANGLE.CU
	-0.191	HULGRWD.DB	CULM_ANGLE.DB
	-0.148	HULGRWD.DB	CUNO.CU
	-0.15	HULGRWD.DB	CUNO.IRRI
	0.029	HULGRWD.DB	DTHD.CU
	-0.005	HULGRWD.DB	DTHD.DB
	-0.07	HULGRWD.DB	DTHD.IRRI
	0.121	HULGRWD.DB	FLFLG.CU
	0.201	HULGRWD.DB	FLFLG.DB
	0.152	HULGRWD.DB	FLFLG.IRRI
	0.35	HULGRWD.DB	FLFLWD.DB
	0.191	HULGRWD.DB	FLFWD.IRRI
	-0.074	HULGRWD.DB	PNLG.CU
	0.068	HULGRWD.DB	PNLG.DB
	-0.066	HULGRWD.DB	PNLG.IRRI
	-0.186	HULGRWD.DB	PNNB.CU
	-0.326	HULGRWD.DB	PNNB.DB
	0.012	HULGRWD.DB	PNNB.IRRI
	-0.06	HULGRWD.DB	PTHT.CU
	0.073	HULGRWD.DB	PTHT.DB
	-0.12	HULGRWD.DB	CULT.IRRI
	0.111	HULGRWD.DB	PBRNB.DB
	-0.073	HULGRWD.DB	PANBASE.IRRI
	0.167	HULGRWD.DB	SEED_S2_BAG.CU
	0.099	HULGRWD.DB	SEED_S2_NONBAG.CU
	-0.086	HULGRWD.DB	UNFILGRNB.DB
	0.029	HULGRWD.DB	UNFILLED.IRRI
	0.097	HULGRWD.DB	FERT.IRRI
	0.62	HULGRWD.DB	SPKWD.IRRI
	0.075	SPKLT.IRRI	CUHABIT.IRRI
	-0.053	SPKLT.IRRI	CULM_ANGLE.CU
	0.092	SPKLT.IRRI	CULM_ANGLE.DB
	-0.035	SPKLT.IRRI	CUNO.CU
	-0.318	SPKLT.IRRI	CUNO.IRRI
	-0.059	SPKLT.IRRI	DTHD.CU
	-0.059	SPKLT.IRRI	DTHD.DB
	-0.048	SPKLT.IRRI	DTHD.IRRI
	0.028	SPKLT.IRRI	FLFLG.CU
	0.055	SPKLT.IRRI	FLFLG.DB
	-0.079	SPKLT.IRRI	FLFLG.IRRI
	0.087	SPKLT.IRRI	FLFLWD.DB
	-0.096	SPKLT.IRRI	FLFWD.IRRI
	0.01	SPKLT.IRRI	PNLG.CU
	-0.076	SPKLT.IRRI	PNLG.DB
	-0.126	SPKLT.IRRI	PNLG.IRRI
	0.029	SPKLT.IRRI	PNNB.CU
	-0.047	SPKLT.IRRI	PNNB.DB
	-0.172	SPKLT.IRRI	PNNB.IRRI
	-0.099	SPKLT.IRRI	PTHT.CU
	-0.08	SPKLT.IRRI	PTHT.DB
	-0.248	SPKLT.IRRI	CULT.IRRI
	-0.18	SPKLT.IRRI	PBRNB.DB
	-0.036	SPKLT.IRRI	PANBASE.IRRI
	-0.04	SPKLT.IRRI	SEED_S2_BAG.CU
	-0.063	SPKLT.IRRI	SEED_S2_NONBAG.CU
	0.013	SPKLT.IRRI	UNFILGRNB.DB
	-0.199	SPKLT.IRRI	UNFILLED.IRRI
	-0.013	SPKLT.IRRI	FERT.IRRI
	0.172	SPKLT.IRRI	SPKWD.IRRI
	-0.029	SPKLT.IRRI	HULGRWD.DB
	-0.109	HULGRLG.DB	CUHABIT.IRRI
	-0.141	HULGRLG.DB	CULM_ANGLE.CU
	0.238	HULGRLG.DB	CULM_ANGLE.DB
	-0.179	HULGRLG.DB	CUNO.CU
	-0.203	HULGRLG.DB	CUNO.IRRI
	-0.089	HULGRLG.DB	DTHD.CU
	-0.204	HULGRLG.DB	DTHD.DB
	-0.049	HULGRLG.DB	DTHD.IRRI
	0.236	HULGRLG.DB	FLFLG.CU
	0.196	HULGRLG.DB	FLFLG.DB
	-0.182	HULGRLG.DB	FLFLG.IRRI
	0.163	HULGRLG.DB	FLFLWD.DB
	-0.154	HULGRLG.DB	FLFWD.IRRI
	-0.017	HULGRLG.DB	PNLG.CU
	-0.078	HULGRLG.DB	PNLG.DB
	-0.269	HULGRLG.DB	PNLG.IRRI
	-0.058	HULGRLG.DB	PNNB.CU
	-0.084	HULGRLG.DB	PNNB.DB
	-0.09	HULGRLG.DB	PNNB.IRRI
	-0.018	HULGRLG.DB	PTHT.CU
	-0.071	HULGRLG.DB	PTHT.DB
	-0.264	HULGRLG.DB	CULT.IRRI
	-0.192	HULGRLG.DB	PBRNB.DB
	0.007	HULGRLG.DB	PANBASE.IRRI
	0.059	HULGRLG.DB	SEED_S2_BAG.CU
	0.092	HULGRLG.DB	SEED_S2_NONBAG.CU
	-0.101	HULGRLG.DB	UNFILGRNB.DB
	-0.222	HULGRLG.DB	UNFILLED.IRRI
	0.041	HULGRLG.DB	FERT.IRRI
	0.128	HULGRLG.DB	SPKWD.IRRI
	0.09	HULGRLG.DB	HULGRWD.DB
	0.49	HULGRLG.DB	SPKLT.IRRI
	-0.04	HULGRVOL.DB	CUHABIT.IRRI
	-0.274	HULGRVOL.DB	CULM_ANGLE.CU
	-0.095	HULGRVOL.DB	CULM_ANGLE.DB
	-0.192	HULGRVOL.DB	CUNO.CU
	-0.18	HULGRVOL.DB	CUNO.IRRI
	-0.023	HULGRVOL.DB	DTHD.CU
	-0.091	HULGRVOL.DB	DTHD.DB
	-0.098	HULGRVOL.DB	DTHD.IRRI
	0.163	HULGRVOL.DB	FLFLG.CU
	0.232	HULGRVOL.DB	FLFLG.DB
	0.093	HULGRVOL.DB	FLFLG.IRRI
	0.343	HULGRVOL.DB	FLFLWD.DB
	0.114	HULGRVOL.DB	FLFWD.IRRI
	-0.078	HULGRVOL.DB	PNLG.CU
	0.028	HULGRVOL.DB	PNLG.DB
	-0.144	HULGRVOL.DB	PNLG.IRRI
	-0.173	HULGRVOL.DB	PNNB.CU
	-0.308	HULGRVOL.DB	PNNB.DB
	-0.001	HULGRVOL.DB	PNNB.IRRI
	-0.055	HULGRVOL.DB	PTHT.CU
	0.045	HULGRVOL.DB	PTHT.DB
	-0.201	HULGRVOL.DB	CULT.IRRI
	0.017	HULGRVOL.DB	PBRNB.DB
	-0.085	HULGRVOL.DB	PANBASE.IRRI
	0.168	HULGRVOL.DB	SEED_S2_BAG.CU
	0.115	HULGRVOL.DB	SEED_S2_NONBAG.CU
	-0.124	HULGRVOL.DB	UNFILGRNB.DB
	-0.047	HULGRVOL.DB	UNFILLED.IRRI
	0.113	HULGRVOL.DB	FERT.IRRI
	0.615	HULGRVOL.DB	SPKWD.IRRI
	0.95	HULGRVOL.DB	HULGRWD.DB
	0.119	HULGRVOL.DB	SPKLT.IRRI
	0.376	HULGRVOL.DB	HULGRLG.DB
	-0.026	AWNPLU.CU	CUHABIT.IRRI
	0.528	AWNPLU.CU	CULM_ANGLE.CU
	0.349	AWNPLU.CU	CULM_ANGLE.DB
	-0.015	AWNPLU.CU	CUNO.CU
	-0.191	AWNPLU.CU	CUNO.IRRI
	-0.192	AWNPLU.CU	DTHD.CU
	-0.251	AWNPLU.CU	DTHD.DB
	-0.138	AWNPLU.CU	DTHD.IRRI
	-0.021	AWNPLU.CU	FLFLG.CU
	-0.175	AWNPLU.CU	FLFLG.DB
	-0.142	AWNPLU.CU	FLFLG.IRRI
	-0.116	AWNPLU.CU	FLFLWD.DB
	-0.148	AWNPLU.CU	FLFWD.IRRI
	-0.306	AWNPLU.CU	PNLG.CU
	-0.329	AWNPLU.CU	PNLG.DB
	-0.386	AWNPLU.CU	PNLG.IRRI
	0.306	AWNPLU.CU	PNNB.CU
	0.389	AWNPLU.CU	PNNB.DB
	-0.256	AWNPLU.CU	PNNB.IRRI
	-0.307	AWNPLU.CU	PTHT.CU
	-0.368	AWNPLU.CU	PTHT.DB
	-0.305	AWNPLU.CU	CULT.IRRI
	-0.347	AWNPLU.CU	PBRNB.DB
	-0.092	AWNPLU.CU	PANBASE.IRRI
	0.107	AWNPLU.CU	SEED_S2_BAG.CU
	0.118	AWNPLU.CU	SEED_S2_NONBAG.CU
	-0.463	AWNPLU.CU	UNFILGRNB.DB
	-0.374	AWNPLU.CU	UNFILLED.IRRI
	0.282	AWNPLU.CU	FERT.IRRI
	-0.029	AWNPLU.CU	SPKWD.IRRI
	-0.23	AWNPLU.CU	HULGRWD.DB
	0.135	AWNPLU.CU	SPKLT.IRRI
	0.08	AWNPLU.CU	HULGRLG.DB
	-0.187	AWNPLU.CU	HULGRVOL.DB
	-0.034	AWNPLU.DB	CUHABIT.IRRI
	0.442	AWNPLU.DB	CULM_ANGLE.CU
	0.352	AWNPLU.DB	CULM_ANGLE.DB
	-0.11	AWNPLU.DB	CUNO.CU
	-0.191	AWNPLU.DB	CUNO.IRRI
	-0.319	AWNPLU.DB	DTHD.CU
	-0.194	AWNPLU.DB	DTHD.DB
	-0.119	AWNPLU.DB	DTHD.IRRI
	-0.039	AWNPLU.DB	FLFLG.CU
	-0.136	AWNPLU.DB	FLFLG.DB
	-0.136	AWNPLU.DB	FLFLG.IRRI
	-0.201	AWNPLU.DB	FLFLWD.DB
	-0.138	AWNPLU.DB	FLFWD.IRRI
	-0.301	AWNPLU.DB	PNLG.CU
	-0.331	AWNPLU.DB	PNLG.DB
	-0.273	AWNPLU.DB	PNLG.IRRI
	0.326	AWNPLU.DB	PNNB.CU
	0.377	AWNPLU.DB	PNNB.DB
	-0.217	AWNPLU.DB	PNNB.IRRI
	-0.267	AWNPLU.DB	PTHT.CU
	-0.248	AWNPLU.DB	PTHT.DB
	-0.216	AWNPLU.DB	CULT.IRRI
	-0.384	AWNPLU.DB	PBRNB.DB
	-0.298	AWNPLU.DB	PANBASE.IRRI
	0.101	AWNPLU.DB	SEED_S2_BAG.CU
	0.155	AWNPLU.DB	SEED_S2_NONBAG.CU
	-0.467	AWNPLU.DB	UNFILGRNB.DB
	-0.329	AWNPLU.DB	UNFILLED.IRRI
	0.218	AWNPLU.DB	FERT.IRRI
	0.004	AWNPLU.DB	SPKWD.IRRI
	-0.11	AWNPLU.DB	HULGRWD.DB
	-0.011	AWNPLU.DB	SPKLT.IRRI
	0.076	AWNPLU.DB	HULGRLG.DB
	-0.066	AWNPLU.DB	HULGRVOL.DB
	0.702	AWNPLU.DB	AWNPLU.CU
	0.131	AWNWD.IRRI	CUHABIT.IRRI
	0.26	AWNWD.IRRI	CULM_ANGLE.CU
	0.246	AWNWD.IRRI	CULM_ANGLE.DB
	-0.264	AWNWD.IRRI	CUNO.CU
	-0.285	AWNWD.IRRI	CUNO.IRRI
	-0.273	AWNWD.IRRI	DTHD.CU
	-0.27	AWNWD.IRRI	DTHD.DB
	-0.211	AWNWD.IRRI	DTHD.IRRI
	-0.092	AWNWD.IRRI	FLFLG.CU
	-0.138	AWNWD.IRRI	FLFLG.DB
	-0.195	AWNWD.IRRI	FLFLG.IRRI
	-0.003	AWNWD.IRRI	FLFLWD.DB
	-0.215	AWNWD.IRRI	FLFWD.IRRI
	-0.268	AWNWD.IRRI	PNLG.CU
	-0.311	AWNWD.IRRI	PNLG.DB
	-0.371	AWNWD.IRRI	PNLG.IRRI
	0.167	AWNWD.IRRI	PNNB.CU
	0.222	AWNWD.IRRI	PNNB.DB
	-0.304	AWNWD.IRRI	PNNB.IRRI
	-0.349	AWNWD.IRRI	PTHT.CU
	-0.258	AWNWD.IRRI	PTHT.DB
	-0.342	AWNWD.IRRI	CULT.IRRI
	-0.283	AWNWD.IRRI	PBRNB.DB
	-0.231	AWNWD.IRRI	PANBASE.IRRI
	0.115	AWNWD.IRRI	SEED_S2_BAG.CU
	0.296	AWNWD.IRRI	SEED_S2_NONBAG.CU
	-0.399	AWNWD.IRRI	UNFILGRNB.DB
	-0.441	AWNWD.IRRI	UNFILLED.IRRI
	0.292	AWNWD.IRRI	FERT.IRRI
	0.152	AWNWD.IRRI	SPKWD.IRRI
	-0.098	AWNWD.IRRI	HULGRWD.DB
	0.066	AWNWD.IRRI	SPKLT.IRRI
	0.142	AWNWD.IRRI	HULGRLG.DB
	-0.051	AWNWD.IRRI	HULGRVOL.DB
	0.535	AWNWD.IRRI	AWNPLU.CU
	0.599	AWNWD.IRRI	AWNPLU.DB
	0.241	AWNLT.IRRI	CUHABIT.IRRI
	0.354	AWNLT.IRRI	CULM_ANGLE.CU
	0.327	AWNLT.IRRI	CULM_ANGLE.DB
	-0.145	AWNLT.IRRI	CUNO.CU
	-0.418	AWNLT.IRRI	CUNO.IRRI
	-0.123	AWNLT.IRRI	DTHD.CU
	-0.127	AWNLT.IRRI	DTHD.DB
	-0.085	AWNLT.IRRI	DTHD.IRRI
	-0.11	AWNLT.IRRI	FLFLG.CU
	-0.092	AWNLT.IRRI	FLFLG.DB
	-0.281	AWNLT.IRRI	FLFLG.IRRI
	-0.141	AWNLT.IRRI	FLFLWD.DB
	-0.351	AWNLT.IRRI	FLFWD.IRRI
	-0.205	AWNLT.IRRI	PNLG.CU
	-0.213	AWNLT.IRRI	PNLG.DB
	-0.279	AWNLT.IRRI	PNLG.IRRI
	0.1	AWNLT.IRRI	PNNB.CU
	0.256	AWNLT.IRRI	PNNB.DB
	-0.451	AWNLT.IRRI	PNNB.IRRI
	-0.259	AWNLT.IRRI	PTHT.CU
	-0.184	AWNLT.IRRI	PTHT.DB
	-0.207	AWNLT.IRRI	CULT.IRRI
	-0.247	AWNLT.IRRI	PBRNB.DB
	-0.189	AWNLT.IRRI	PANBASE.IRRI
	0.089	AWNLT.IRRI	SEED_S2_BAG.CU
	0.15	AWNLT.IRRI	SEED_S2_NONBAG.CU
	-0.381	AWNLT.IRRI	UNFILGRNB.DB
	-0.519	AWNLT.IRRI	UNFILLED.IRRI
	0.25	AWNLT.IRRI	FERT.IRRI
	-0.064	AWNLT.IRRI	SPKWD.IRRI
	-0.168	AWNLT.IRRI	HULGRWD.DB
	0.196	AWNLT.IRRI	SPKLT.IRRI
	0.171	AWNLT.IRRI	HULGRLG.DB
	-0.119	AWNLT.IRRI	HULGRVOL.DB
	0.575	AWNLT.IRRI	AWNPLU.CU
	0.598	AWNLT.IRRI	AWNPLU.DB
	0.73	AWNLT.IRRI	AWNWD.IRRI

## Sheet: TraitAcronym
Planteome acronym	Descriptive trait name	IRRI acronym (International Rice Research Institute)	DB acronym (Dale Bumpers National Rice Research Center)	CU acronym (Cornell University)
AWNLG	Awn length	AWNLT
AWNPLU	Awn presence		AWNPLU	AWNPLU
CULMHAB	Culm habit	CUHABIT	CULM_ANGLE	CULM_ANGLE
CULT	Culm length	CULT
CUNO	Number of culms per plant	CUNO		CUNO
DTHD	Days to 50% heading	DTHD	DTHD	DTHD
FILGRNB_Bag	Seed count of single bag panicle			SEED_S2_BAG
FILGRNB_NonBag	Seed from all remaining panicles that were not bagged			SEED_S2_NONBAG
FLFLG	Flag leaf length	FLFLG	FLFLG	FLFLG
FLFLWD	Flag leaf lamina width	FLFWD	FLFLWD
HULGRLG	Seed length		HULGRLG
HULGRVOL	Seed volume		HULGRVOL
HULGRWD	Seed width		HULGRWD
PBRNB	Panicle branch number	PANBASE	PBRNB
PNLG	Panicle length	PNLG	PNLG	PNLG
PNNB	Number of panicles per plant	PNNB	PNNB	PNNB
PTHT	Plant height		PTHT	PTHT
SPKFRT	Panicle fertility	FERT
SPKLG	Spikelet length	SPKLT
SPKWD	Spikelet width	SPKWD
UNFILGRNB	Number of empty spikelets per panicle	UNFILLED	UNFILGRNB
