# Supplementary material for: Phenotypic Variation and the Impact of Admixture in the Oryza rufipogon Species Complex (ORSC)
Source: Front Plant Sci. 2022 Jun 13;13:787703. doi: 10.3389/fpls.2022.787703 (PMC9235872; doi:10.3389/fpls.2022.787703)
Supplement: Supplementary file 7 [file Table_7.xlsx]

## Sheet: Table S7 Legend
	Supplementary Table 7: Values for the phenotypic identifiers of group divergence summarized from data collected at the International Rice Research Institute (IRRI), Los Baños, Laguna, Philippines; Dale Bumpers National Rice Research Center (DB), Stuttgart, Arkansas, USA; and Cornell University (CU), Ithaca, New York USA, (A) Traits sorted by the strength of the association of their values to NG= …

## Sheet: HotellingT2
Planteome	Hotelling_T2	Trait_IRRI		Planteome	Hotelling_T2	DaleBumpers_traits		Planteome	Hotelling_T2	CornellUniv_traits
CULT	0.7121	CULT		HULGRVOL	1.70034	HULGRVOL		FILGRNB_NonBag	0.245946	SEED_S2_NONBAG
UNFILGRNB	0.6996	UNFILLED		HULGRWD	1.14645	HULGRWD		AWNPLU	0.217437	AWNPLU
AWNWD	0.2755	AWNWD		PTHT	0.22329	PTHT		FILGRNB_Bag	0.166729	SEED_S2_BAG
PENLFLG	0.2647	2LLT		HULGRLG	0.216921	HULGRLG		AWNPLU_Binary	0.152924	AWN_BINARY
AWNLG	0.2291	AWNLT		AWNPLU	0.143256	AWNPLU		PTHT	0.0806478	PTHT
STLEMWD	0.2173	STLWD		FILGRNB	0.0459395	HULGRCO		RHIFOR	0.0794284	STOLON_BINARY
ANTLT	0.2071	ANTLT		RHIFOR	0.0451933	STOLON_BINARY		SDSH	0.0761781	SDSH_BINARY
PanBasBrDist	0.1838	DIST		FLFLWD	0.0374498	FLFLWD		CUNO	0.0648672	CUNO
CUDI	0.1716	CUDI		UNFILGRNB	0.0339855	UNFILGRNB		PericCol_Binary	0.0642089	PERICARPCOL_BINARY
SPKWD	0.1302	SPKWD		PNNB	0.0297355	PNNB		FLFLG	0.0603658	FLFLG
SPKFRT	0.1099	FERT		PNLG	0.0261614	PNLG		CULMHAB	0.0561505	CULM_ANGLE
CULMHAB_VEG	0.0969	CUHABIT_VEG		PBRNB	0.0209333	PBRNB		BLSCO	0.0324426	STEMCOL_BINARY
PNNB	0.0944	PNNB		CULMHAB	0.0202108	CULM_ANGLE		DTHD	0.0288733	DTHD
SPKLG	0.084	SPKLT		SDSH	0.0112853	SDSH_BINARY		PNNB	0.0244159	PNNB
PNLG	0.0722	PNLG		DTHD	0.00945959	DTHD		HULCL	0.0228864	HULCL
CULMHAB	0.061	CUHABIT		FLFLG	0.00779744	FLFLG		PNLG	0.00534072	PNLG
FLFLWD	0.0569	FLFWD		AWNPLU_Binary	0.000527735	AWN_BINARY
LIGLG	0.043	LIGLT
PENLFLWD	0.0362	2LWD
STIGLG	0.0316	STGLT
STYLLG	0.0279	STYLT
PANTYP	0.0258	PANTYPE
PBRNB	0.0215	PANBASE
DTHD	0.0204	DTHD
FLFLG	0.0178	FLFLG
LFAG	0.0155	FLAGATT
PanAxAtt	0.013	PAMB
Pan2ndBr	0.0089	PAN2BR
PANEXS	0.0089	PANEXS
STLEMLG	0.0025	STLLT
LSEN	0.0013	LEAF
CUNO	0	CUNO

## Sheet: IRRI_Correlation
x	y	p	Trait_Pair	correlation	i.x	i.y	Phenotypic group
FLFLG	FERT	0.6934	FLFLG.FERT	0.0264398	FLFLG.P1	FERT	P1
2LLT	FERT	0.1149	2LLT.FERT	0.0260975	2LLT.P1	FERT	P1
2LLT	FLFLG	0.0342	2LLT.FLFLG	0.737804	2LLT.P1	FLFLG	P1
ANTLT	FERT	0.019	ANTLT.FERT	-0.121991	ANTLT.P1	FERT	P1
ANTLT	FLFLG	0.2208	ANTLT.FLFLG	-0.351711	ANTLT.P1	FLFLG	P1
ANTLT	2LLT	0.0263	ANTLT.2LLT	-0.243037	ANTLT.P1	2LLT	P1
LIGLT	FERT	0.2806	LIGLT.FERT	-0.00235694	LIGLT.P1	FERT	P1
LIGLT	FLFLG	0.5225	LIGLT.FLFLG	0.253322	LIGLT.P1	FLFLG	P1
LIGLT	2LLT	0.9619	LIGLT.2LLT	0.471737	LIGLT.P1	2LLT	P1
LIGLT	ANTLT	0.0009	LIGLT.ANTLT	-0.0875784	LIGLT.P1	ANTLT	P1
PANBASE	FERT	0.9298	PANBASE.FERT	-0.233461	PANBASE.P1	FERT	P1
PANBASE	FLFLG	0.2326	PANBASE.FLFLG	-0.0450834	PANBASE.P1	FLFLG	P1
PANBASE	2LLT	0.6085	PANBASE.2LLT	0.0477545	PANBASE.P1	2LLT	P1
PANBASE	ANTLT	0.2813	PANBASE.ANTLT	0.102259	PANBASE.P1	ANTLT	P1
PANBASE	LIGLT	0.0491	PANBASE.LIGLT	-0.0261007	PANBASE.P1	LIGLT	P1
UNFILLED	FERT	0.3236	UNFILLED.FERT	-0.68428	UNFILLED.P1	FERT	P1
UNFILLED	FLFLG	0.9851	UNFILLED.FLFLG	0.275746	UNFILLED.P1	FLFLG	P1
UNFILLED	2LLT	0.3214	UNFILLED.2LLT	0.307257	UNFILLED.P1	2LLT	P1
UNFILLED	ANTLT	0.0057	UNFILLED.ANTLT	-0.226887	UNFILLED.P1	ANTLT	P1
UNFILLED	LIGLT	0.8087	UNFILLED.LIGLT	0.147891	UNFILLED.P1	LIGLT	P1
UNFILLED	PANBASE	0.5577	UNFILLED.PANBASE	0.303996	UNFILLED.P1	PANBASE	P1
DTHD	FERT	0.353	DTHD.FERT	0.00433938	DTHD.P1	FERT	P1
DTHD	FLFLG	0.0135	DTHD.FLFLG	-0.46973	DTHD.P1	FLFLG	P1
DTHD	2LLT	0.0744	DTHD.2LLT	-0.154823	DTHD.P1	2LLT	P1
DTHD	ANTLT	0.003	DTHD.ANTLT	0.276017	DTHD.P1	ANTLT	P1
DTHD	LIGLT	0.0072	DTHD.LIGLT	0.0361404	DTHD.P1	LIGLT	P1
DTHD	PANBASE	0.0272	DTHD.PANBASE	0.0956501	DTHD.P1	PANBASE	P1
DTHD	UNFILLED	0.513	DTHD.UNFILLED	-0.107753	DTHD.P1	UNFILLED	P1
CUDI	FERT	0.0006	CUDI.FERT	0.103079	CUDI.P1	FERT	P1
CUDI	FLFLG	0.3655	CUDI.FLFLG	-0.0859911	CUDI.P1	FLFLG	P1
CUDI	2LLT	0.034	CUDI.2LLT	0.243385	CUDI.P1	2LLT	P1
CUDI	ANTLT	0.0018	CUDI.ANTLT	-0.081287	CUDI.P1	ANTLT	P1
CUDI	LIGLT	0.0984	CUDI.LIGLT	0.278468	CUDI.P1	LIGLT	P1
CUDI	PANBASE	0.008	CUDI.PANBASE	-0.0123128	CUDI.P1	PANBASE	P1
CUDI	UNFILLED	0.0001	CUDI.UNFILLED	0.0540426	CUDI.P1	UNFILLED	P1
CUDI	DTHD	0.6109	CUDI.DTHD	0.427453	CUDI.P1	DTHD	P1
CULT	FERT	0.0079	CULT.FERT	0.0475938	CULT.P1	FERT	P1
CULT	FLFLG	0.0377	CULT.FLFLG	-0.27753	CULT.P1	FLFLG	P1
CULT	2LLT	0.0642	CULT.2LLT	0.0340798	CULT.P1	2LLT	P1
CULT	ANTLT	0.0003	CULT.ANTLT	0.275525	CULT.P1	ANTLT	P1
CULT	LIGLT	0.0238	CULT.LIGLT	0.193141	CULT.P1	LIGLT	P1
CULT	PANBASE	0.1229	CULT.PANBASE	-0.159788	CULT.P1	PANBASE	P1
CULT	UNFILLED	0.0447	CULT.UNFILLED	0.00891147	CULT.P1	UNFILLED	P1
CULT	DTHD	0.0846	CULT.DTHD	0.660054	CULT.P1	DTHD	P1
CULT	CUDI	0.9621	CULT.CUDI	0.543673	CULT.P1	CUDI	P1
DIST	FERT	0.1703	DIST.FERT	-0.204879	DIST.P1	FERT	P1
DIST	FLFLG	0.3138	DIST.FLFLG	0.00745533	DIST.P1	FLFLG	P1
DIST	2LLT	0.0017	DIST.2LLT	0.211789	DIST.P1	2LLT	P1
DIST	ANTLT	0.0126	DIST.ANTLT	0.212966	DIST.P1	ANTLT	P1
DIST	LIGLT	0.876	DIST.LIGLT	0.249075	DIST.P1	LIGLT	P1
DIST	PANBASE	0.8699	DIST.PANBASE	-0.0837906	DIST.P1	PANBASE	P1
DIST	UNFILLED	0.3818	DIST.UNFILLED	0.114027	DIST.P1	UNFILLED	P1
DIST	DTHD	0.3326	DIST.DTHD	0.163285	DIST.P1	DTHD	P1
DIST	CUDI	0.0219	DIST.CUDI	0.19421	DIST.P1	CUDI	P1
DIST	CULT	0.0104	DIST.CULT	0.233931	DIST.P1	CULT	P1
PNLG	FERT	0.0147	PNLG.FERT	-0.0653601	PNLG.P1	FERT	P1
PNLG	FLFLG	0.6652	PNLG.FLFLG	0.261777	PNLG.P1	FLFLG	P1
PNLG	2LLT	0.5494	PNLG.2LLT	0.534797	PNLG.P1	2LLT	P1
PNLG	ANTLT	0.16	PNLG.ANTLT	0.0663103	PNLG.P1	ANTLT	P1
PNLG	LIGLT	0.9302	PNLG.LIGLT	0.261353	PNLG.P1	LIGLT	P1
PNLG	PANBASE	0.4256	PNLG.PANBASE	-0.0649304	PNLG.P1	PANBASE	P1
PNLG	UNFILLED	0.0001	PNLG.UNFILLED	0.291239	PNLG.P1	UNFILLED	P1
PNLG	DTHD	0.6717	PNLG.DTHD	0.114271	PNLG.P1	DTHD	P1
PNLG	CUDI	0.2274	PNLG.CUDI	0.30891	PNLG.P1	CUDI	P1
PNLG	CULT	0.2684	PNLG.CULT	0.367072	PNLG.P1	CULT	P1
PNLG	DIST	0.0085	PNLG.DIST	0.475524	PNLG.P1	DIST	P1
FLFWD	FERT	0.1251	FLFWD.FERT	0.0151892	FLFWD.P1	FERT	P1
FLFWD	FLFLG	0.2524	FLFWD.FLFLG	-0.0523661	FLFWD.P1	FLFLG	P1
FLFWD	2LLT	0.749	FLFWD.2LLT	0.140655	FLFWD.P1	2LLT	P1
FLFWD	ANTLT	0.0085	FLFWD.ANTLT	0.155832	FLFWD.P1	ANTLT	P1
FLFWD	LIGLT	0.0003	FLFWD.LIGLT	0.287099	FLFWD.P1	LIGLT	P1
FLFWD	PANBASE	0.0297	FLFWD.PANBASE	0.20019	FLFWD.P1	PANBASE	P1
FLFWD	UNFILLED	0.573	FLFWD.UNFILLED	0.128053	FLFWD.P1	UNFILLED	P1
FLFWD	DTHD	0.0003	FLFWD.DTHD	0.23671	FLFWD.P1	DTHD	P1
FLFWD	CUDI	0.0046	FLFWD.CUDI	0.48104	FLFWD.P1	CUDI	P1
FLFWD	CULT	0.0008	FLFWD.CULT	0.331173	FLFWD.P1	CULT	P1
FLFWD	DIST	0.1511	FLFWD.DIST	0.0981427	FLFWD.P1	DIST	P1
FLFWD	PNLG	0.0101	FLFWD.PNLG	0.149484	FLFWD.P1	PNLG	P1
2LWD	FERT	0.0086	2LWD.FERT	0.0765374	2LWD.P1	FERT	P1
2LWD	FLFLG	0.0198	2LWD.FLFLG	-0.320961	2LWD.P1	FLFLG	P1
2LWD	2LLT	0.552	2LWD.2LLT	-0.0303404	2LWD.P1	2LLT	P1
2LWD	ANTLT	0.0016	2LWD.ANTLT	0.29015	2LWD.P1	ANTLT	P1
2LWD	LIGLT	0.3509	2LWD.LIGLT	0.175465	2LWD.P1	LIGLT	P1
2LWD	PANBASE	0.2529	2LWD.PANBASE	0.16357	2LWD.P1	PANBASE	P1
2LWD	UNFILLED	0.0456	2LWD.UNFILLED	-0.0329933	2LWD.P1	UNFILLED	P1
2LWD	DTHD	0.0024	2LWD.DTHD	0.406671	2LWD.P1	DTHD	P1
2LWD	CUDI	0.1394	2LWD.CUDI	0.552708	2LWD.P1	CUDI	P1
2LWD	CULT	0.0028	2LWD.CULT	0.505873	2LWD.P1	CULT	P1
2LWD	DIST	0.2369	2LWD.DIST	0.153998	2LWD.P1	DIST	P1
2LWD	PNLG	0.05	2LWD.PNLG	0.0986825	2LWD.P1	PNLG	P1
2LWD	FLFWD	0.2648	2LWD.FLFWD	0.840407	2LWD.P1	FLFWD	P1
SPKLT	FERT	0.856	SPKLT.FERT	-0.0850132	SPKLT.P1	FERT	P1
SPKLT	FLFLG	0.026	SPKLT.FLFLG	0.26414	SPKLT.P1	FLFLG	P1
SPKLT	2LLT	0.0466	SPKLT.2LLT	0.232072	SPKLT.P1	2LLT	P1
SPKLT	ANTLT	0.3041	SPKLT.ANTLT	0.0738414	SPKLT.P1	ANTLT	P1
SPKLT	LIGLT	0.6239	SPKLT.LIGLT	0.113726	SPKLT.P1	LIGLT	P1
SPKLT	PANBASE	0.2487	SPKLT.PANBASE	-0.0908136	SPKLT.P1	PANBASE	P1
SPKLT	UNFILLED	0.5444	SPKLT.UNFILLED	-0.0195602	SPKLT.P1	UNFILLED	P1
SPKLT	DTHD	0.0002	SPKLT.DTHD	-0.133595	SPKLT.P1	DTHD	P1
SPKLT	CUDI	0.8436	SPKLT.CUDI	0.0378998	SPKLT.P1	CUDI	P1
SPKLT	CULT	0.0015	SPKLT.CULT	-0.081548	SPKLT.P1	CULT	P1
SPKLT	DIST	0.0182	SPKLT.DIST	0.0669817	SPKLT.P1	DIST	P1
SPKLT	PNLG	0.0838	SPKLT.PNLG	0.288899	SPKLT.P1	PNLG	P1
SPKLT	FLFWD	0.2295	SPKLT.FLFWD	-0.049508	SPKLT.P1	FLFWD	P1
SPKLT	2LWD	0.3696	SPKLT.2LWD	-0.140648	SPKLT.P1	2LWD	P1
STLWD	FERT	0.4675	STLWD.FERT	0.172578	STLWD.P1	FERT	P1
STLWD	FLFLG	0.0637	STLWD.FLFLG	0.108641	STLWD.P1	FLFLG	P1
STLWD	2LLT	0.0181	STLWD.2LLT	0.107146	STLWD.P1	2LLT	P1
STLWD	ANTLT	0.1193	STLWD.ANTLT	-0.143763	STLWD.P1	ANTLT	P1
STLWD	LIGLT	0.3836	STLWD.LIGLT	0.0839528	STLWD.P1	LIGLT	P1
STLWD	PANBASE	0.0026	STLWD.PANBASE	-0.348134	STLWD.P1	PANBASE	P1
STLWD	UNFILLED	0.0883	STLWD.UNFILLED	-0.205533	STLWD.P1	UNFILLED	P1
STLWD	DTHD	0.0203	STLWD.DTHD	0.0176964	STLWD.P1	DTHD	P1
STLWD	CUDI	0.7834	STLWD.CUDI	0.179623	STLWD.P1	CUDI	P1
STLWD	CULT	0.1809	STLWD.CULT	-0.000982349	STLWD.P1	CULT	P1
STLWD	DIST	0.3964	STLWD.DIST	-0.00190692	STLWD.P1	DIST	P1
STLWD	PNLG	0.552	STLWD.PNLG	0.147939	STLWD.P1	PNLG	P1
STLWD	FLFWD	0.7259	STLWD.FLFWD	-0.0121909	STLWD.P1	FLFWD	P1
STLWD	2LWD	0.2518	STLWD.2LWD	0.0259984	STLWD.P1	2LWD	P1
STLWD	SPKLT	0.173	STLWD.SPKLT	0.406992	STLWD.P1	SPKLT	P1
SPKWD	FERT	0.3691	SPKWD.FERT	0.0150824	SPKWD.P1	FERT	P1
SPKWD	FLFLG	0.0102	SPKWD.FLFLG	0.435842	SPKWD.P1	FLFLG	P1
SPKWD	2LLT	0.1996	SPKWD.2LLT	0.307957	SPKWD.P1	2LLT	P1
SPKWD	ANTLT	0.0009	SPKWD.ANTLT	-0.554438	SPKWD.P1	ANTLT	P1
SPKWD	LIGLT	0.0439	SPKWD.LIGLT	0.121913	SPKWD.P1	LIGLT	P1
SPKWD	PANBASE	0.2859	SPKWD.PANBASE	-0.164967	SPKWD.P1	PANBASE	P1
SPKWD	UNFILLED	0.2364	SPKWD.UNFILLED	0.16141	SPKWD.P1	UNFILLED	P1
SPKWD	DTHD	0.0534	SPKWD.DTHD	-0.258117	SPKWD.P1	DTHD	P1
SPKWD	CUDI	0.5404	SPKWD.CUDI	0.222819	SPKWD.P1	CUDI	P1
SPKWD	CULT	0.0093	SPKWD.CULT	-0.137983	SPKWD.P1	CULT	P1
SPKWD	DIST	0.3514	SPKWD.DIST	-0.135662	SPKWD.P1	DIST	P1
SPKWD	PNLG	0.0997	SPKWD.PNLG	0.0623485	SPKWD.P1	PNLG	P1
SPKWD	FLFWD	0.0761	SPKWD.FLFWD	0.0251592	SPKWD.P1	FLFWD	P1
SPKWD	2LWD	0.1918	SPKWD.2LWD	-0.0986797	SPKWD.P1	2LWD	P1
SPKWD	SPKLT	0.1017	SPKWD.SPKLT	0.252172	SPKWD.P1	SPKLT	P1
SPKWD	STLWD	0.996	SPKWD.STLWD	0.11884	SPKWD.P1	STLWD	P1
STLLT	FERT	0.1421	STLLT.FERT	0.0564903	STLLT.P1	FERT	P1
STLLT	FLFLG	0.314	STLLT.FLFLG	0.172625	STLLT.P1	FLFLG	P1
STLLT	2LLT	0.464	STLLT.2LLT	0.0888365	STLLT.P1	2LLT	P1
STLLT	ANTLT	0.2082	STLLT.ANTLT	-0.0663166	STLLT.P1	ANTLT	P1
STLLT	LIGLT	0.6874	STLLT.LIGLT	0.103656	STLLT.P1	LIGLT	P1
STLLT	PANBASE	0.2204	STLLT.PANBASE	-0.212812	STLLT.P1	PANBASE	P1
STLLT	UNFILLED	0.4497	STLLT.UNFILLED	-0.0872006	STLLT.P1	UNFILLED	P1
STLLT	DTHD	0.1243	STLLT.DTHD	-0.15617	STLLT.P1	DTHD	P1
STLLT	CUDI	0.7358	STLLT.CUDI	0.0729679	STLLT.P1	CUDI	P1
STLLT	CULT	0.0529	STLLT.CULT	-0.0819762	STLLT.P1	CULT	P1
STLLT	DIST	0.3879	STLLT.DIST	-0.0900519	STLLT.P1	DIST	P1
STLLT	PNLG	0.0679	STLLT.PNLG	0.0809487	STLLT.P1	PNLG	P1
STLLT	FLFWD	0.6467	STLLT.FLFWD	0.00664407	STLLT.P1	FLFWD	P1
STLLT	2LWD	0.7734	STLLT.2LWD	-0.0252019	STLLT.P1	2LWD	P1
STLLT	SPKLT	0.2722	STLLT.SPKLT	0.436909	STLLT.P1	SPKLT	P1
STLLT	STLWD	0.8242	STLLT.STLWD	0.427269	STLLT.P1	STLWD	P1
STLLT	SPKWD	0.2041	STLLT.SPKWD	0.318819	STLLT.P1	SPKWD	P1
STYLT	FERT	0.1107	STYLT.FERT	-0.147892	STYLT.P1	FERT	P1
STYLT	FLFLG	0.6905	STYLT.FLFLG	-0.0397788	STYLT.P1	FLFLG	P1
STYLT	2LLT	0.3647	STYLT.2LLT	0.0572881	STYLT.P1	2LLT	P1
STYLT	ANTLT	0.5685	STYLT.ANTLT	0.111318	STYLT.P1	ANTLT	P1
STYLT	LIGLT	0.225	STYLT.LIGLT	0.01555	STYLT.P1	LIGLT	P1
STYLT	PANBASE	0.4933	STYLT.PANBASE	-0.1362	STYLT.P1	PANBASE	P1
STYLT	UNFILLED	0.1671	STYLT.UNFILLED	0.0456389	STYLT.P1	UNFILLED	P1
STYLT	DTHD	0.2495	STYLT.DTHD	0.188921	STYLT.P1	DTHD	P1
STYLT	CUDI	0.762	STYLT.CUDI	0.204402	STYLT.P1	CUDI	P1
STYLT	CULT	0.1026	STYLT.CULT	0.129246	STYLT.P1	CULT	P1
STYLT	DIST	0.9079	STYLT.DIST	0.0780234	STYLT.P1	DIST	P1
STYLT	PNLG	0.3694	STYLT.PNLG	0.27553	STYLT.P1	PNLG	P1
STYLT	FLFWD	0.6396	STYLT.FLFWD	0.113677	STYLT.P1	FLFWD	P1
STYLT	2LWD	0.5736	STYLT.2LWD	0.137105	STYLT.P1	2LWD	P1
STYLT	SPKLT	0.6139	STYLT.SPKLT	0.341472	STYLT.P1	SPKLT	P1
STYLT	STLWD	0.014	STYLT.STLWD	0.421289	STYLT.P1	STLWD	P1
STYLT	SPKWD	0.3237	STYLT.SPKWD	0.0827253	STYLT.P1	SPKWD	P1
STYLT	STLLT	0.1002	STYLT.STLLT	0.349681	STYLT.P1	STLLT	P1
AWNLT	FERT	0.5259	AWNLT.FERT	0.197901	AWNLT.P1	FERT	P1
AWNLT	FLFLG	0.4974	AWNLT.FLFLG	0.00839149	AWNLT.P1	FLFLG	P1
AWNLT	2LLT	0.3839	AWNLT.2LLT	0.231389	AWNLT.P1	2LLT	P1
AWNLT	ANTLT	0.0086	AWNLT.ANTLT	0.0375652	AWNLT.P1	ANTLT	P1
AWNLT	LIGLT	0.7794	AWNLT.LIGLT	0.236168	AWNLT.P1	LIGLT	P1
AWNLT	PANBASE	0.2669	AWNLT.PANBASE	-0.0961647	AWNLT.P1	PANBASE	P1
AWNLT	UNFILLED	0.7993	AWNLT.UNFILLED	-0.143583	AWNLT.P1	UNFILLED	P1
AWNLT	DTHD	0.0024	AWNLT.DTHD	0.0502108	AWNLT.P1	DTHD	P1
AWNLT	CUDI	0.1574	AWNLT.CUDI	0.245853	AWNLT.P1	CUDI	P1
AWNLT	CULT	0.2955	AWNLT.CULT	0.0562432	AWNLT.P1	CULT	P1
AWNLT	DIST	0.0469	AWNLT.DIST	0.0332612	AWNLT.P1	DIST	P1
AWNLT	PNLG	0.7552	AWNLT.PNLG	0.177194	AWNLT.P1	PNLG	P1
AWNLT	FLFWD	0.3497	AWNLT.FLFWD	-0.0796205	AWNLT.P1	FLFWD	P1
AWNLT	2LWD	0.5667	AWNLT.2LWD	-0.0362891	AWNLT.P1	2LWD	P1
AWNLT	SPKLT	0.2685	AWNLT.SPKLT	0.189353	AWNLT.P1	SPKLT	P1
AWNLT	STLWD	0.2303	AWNLT.STLWD	0.26151	AWNLT.P1	STLWD	P1
AWNLT	SPKWD	0.1949	AWNLT.SPKWD	-0.0311222	AWNLT.P1	SPKWD	P1
AWNLT	STLLT	0.6	AWNLT.STLLT	0.0947905	AWNLT.P1	STLLT	P1
AWNLT	STYLT	0.589	AWNLT.STYLT	0.223824	AWNLT.P1	STYLT	P1
AWNWD	FERT	0.8777	AWNWD.FERT	0.0490028	AWNWD.P1	FERT	P1
AWNWD	FLFLG	0.5696	AWNWD.FLFLG	0.16076	AWNWD.P1	FLFLG	P1
AWNWD	2LLT	0.3448	AWNWD.2LLT	0.169853	AWNWD.P1	2LLT	P1
AWNWD	ANTLT	0.9044	AWNWD.ANTLT	-0.302923	AWNWD.P1	ANTLT	P1
AWNWD	LIGLT	0.4042	AWNWD.LIGLT	0.0535015	AWNWD.P1	LIGLT	P1
AWNWD	PANBASE	0.082	AWNWD.PANBASE	-0.141278	AWNWD.P1	PANBASE	P1
AWNWD	UNFILLED	0.8823	AWNWD.UNFILLED	-0.00598359	AWNWD.P1	UNFILLED	P1
AWNWD	DTHD	0.4497	AWNWD.DTHD	-0.16711	AWNWD.P1	DTHD	P1
AWNWD	CUDI	0.7404	AWNWD.CUDI	0.139794	AWNWD.P1	CUDI	P1
AWNWD	CULT	0.5694	AWNWD.CULT	-0.1639	AWNWD.P1	CULT	P1
AWNWD	DIST	0.3275	AWNWD.DIST	-0.171867	AWNWD.P1	DIST	P1
AWNWD	PNLG	0.2496	AWNWD.PNLG	-0.0772375	AWNWD.P1	PNLG	P1
AWNWD	FLFWD	0.0839	AWNWD.FLFWD	-0.181506	AWNWD.P1	FLFWD	P1
AWNWD	2LWD	0.2241	AWNWD.2LWD	-0.239173	AWNWD.P1	2LWD	P1
AWNWD	SPKLT	0.0223	AWNWD.SPKLT	-0.0876899	AWNWD.P1	SPKLT	P1
AWNWD	STLWD	0.1132	AWNWD.STLWD	0.015056	AWNWD.P1	STLWD	P1
AWNWD	SPKWD	0.0162	AWNWD.SPKWD	0.269105	AWNWD.P1	SPKWD	P1
AWNWD	STLLT	0.0377	AWNWD.STLLT	-0.00912961	AWNWD.P1	STLLT	P1
AWNWD	STYLT	0.6008	AWNWD.STYLT	-0.0834727	AWNWD.P1	STYLT	P1
AWNWD	AWNLT	0.0028	AWNWD.AWNLT	0.315456	AWNWD.P1	AWNLT	P1
STGLT	FERT	0.0077	STGLT.FERT	-0.167564	STGLT.P1	FERT	P1
STGLT	FLFLG	0.8839	STGLT.FLFLG	-0.0210302	STGLT.P1	FLFLG	P1
STGLT	2LLT	0.8149	STGLT.2LLT	-0.111239	STGLT.P1	2LLT	P1
STGLT	ANTLT	0.2576	STGLT.ANTLT	0.350246	STGLT.P1	ANTLT	P1
STGLT	LIGLT	0.9443	STGLT.LIGLT	0.074328	STGLT.P1	LIGLT	P1
STGLT	PANBASE	0.6713	STGLT.PANBASE	0.197264	STGLT.P1	PANBASE	P1
STGLT	UNFILLED	0.2048	STGLT.UNFILLED	0.108851	STGLT.P1	UNFILLED	P1
STGLT	DTHD	0.7075	STGLT.DTHD	0.00959847	STGLT.P1	DTHD	P1
STGLT	CUDI	0.3585	STGLT.CUDI	0.0528994	STGLT.P1	CUDI	P1
STGLT	CULT	0.1802	STGLT.CULT	0.156262	STGLT.P1	CULT	P1
STGLT	DIST	0.119	STGLT.DIST	0.0467621	STGLT.P1	DIST	P1
STGLT	PNLG	0.312	STGLT.PNLG	0.0440416	STGLT.P1	PNLG	P1
STGLT	FLFWD	0.1903	STGLT.FLFWD	0.0610079	STGLT.P1	FLFWD	P1
STGLT	2LWD	0.1984	STGLT.2LWD	0.0741121	STGLT.P1	2LWD	P1
STGLT	SPKLT	0.9734	STGLT.SPKLT	0.0920662	STGLT.P1	SPKLT	P1
STGLT	STLWD	0.1091	STGLT.STLWD	-0.301306	STGLT.P1	STLWD	P1
STGLT	SPKWD	0.0212	STGLT.SPKWD	-0.103484	STGLT.P1	SPKWD	P1
STGLT	STLLT	0.4926	STGLT.STLLT	0.0570817	STGLT.P1	STLLT	P1
STGLT	STYLT	0.2903	STGLT.STYLT	-0.0275692	STGLT.P1	STYLT	P1
STGLT	AWNLT	0.6121	STGLT.AWNLT	-0.0956704	STGLT.P1	AWNLT	P1
STGLT	AWNWD	0.882	STGLT.AWNWD	-0.00583173	STGLT.P1	AWNWD	P1
PAN2BR	FERT	0.4993	PAN2BR.FERT	0.0743388	PAN2BR.P1	FERT	P1
PAN2BR	FLFLG	0.1917	PAN2BR.FLFLG	0.109515	PAN2BR.P1	FLFLG	P1
PAN2BR	2LLT	0.135	PAN2BR.2LLT	0.200526	PAN2BR.P1	2LLT	P1
PAN2BR	ANTLT	0.6818	PAN2BR.ANTLT	0.0385734	PAN2BR.P1	ANTLT	P1
PAN2BR	LIGLT	0.7737	PAN2BR.LIGLT	0.0993317	PAN2BR.P1	LIGLT	P1
PAN2BR	PANBASE	0.7322	PAN2BR.PANBASE	0.00186256	PAN2BR.P1	PANBASE	P1
PAN2BR	UNFILLED	0.657	PAN2BR.UNFILLED	-0.0664519	PAN2BR.P1	UNFILLED	P1
PAN2BR	DTHD	0.7844	PAN2BR.DTHD	0.103431	PAN2BR.P1	DTHD	P1
PAN2BR	CUDI	0.2232	PAN2BR.CUDI	0.175243	PAN2BR.P1	CUDI	P1
PAN2BR	CULT	0.4338	PAN2BR.CULT	0.174132	PAN2BR.P1	CULT	P1
PAN2BR	DIST	0.6105	PAN2BR.DIST	0.0526475	PAN2BR.P1	DIST	P1
PAN2BR	PNLG	0.0276	PAN2BR.PNLG	0.201713	PAN2BR.P1	PNLG	P1
PAN2BR	FLFWD	0.4152	PAN2BR.FLFWD	0.109092	PAN2BR.P1	FLFWD	P1
PAN2BR	2LWD	0.7186	PAN2BR.2LWD	0.0875381	PAN2BR.P1	2LWD	P1
PAN2BR	SPKLT	0.6717	PAN2BR.SPKLT	0.0666236	PAN2BR.P1	SPKLT	P1
PAN2BR	STLWD	0.8566	PAN2BR.STLWD	0.0999142	PAN2BR.P1	STLWD	P1
PAN2BR	SPKWD	0.2228	PAN2BR.SPKWD	0.052871	PAN2BR.P1	SPKWD	P1
PAN2BR	STLLT	0.3637	PAN2BR.STLLT	-0.0405705	PAN2BR.P1	STLLT	P1
PAN2BR	STYLT	0.6694	PAN2BR.STYLT	0.238209	PAN2BR.P1	STYLT	P1
PAN2BR	AWNLT	0.7728	PAN2BR.AWNLT	0.161473	PAN2BR.P1	AWNLT	P1
PAN2BR	AWNWD	0.252	PAN2BR.AWNWD	-0.234683	PAN2BR.P1	AWNWD	P1
PAN2BR	STGLT	0.096	PAN2BR.STGLT	-0.153492	PAN2BR.P1	STGLT	P1
LEAF	FERT	0.5327	LEAF.FERT	0.0476197	LEAF.P1	FERT	P1
LEAF	FLFLG	0.6923	LEAF.FLFLG	0.0165031	LEAF.P1	FLFLG	P1
LEAF	2LLT	0.7385	LEAF.2LLT	0.0655036	LEAF.P1	2LLT	P1
LEAF	ANTLT	0.7681	LEAF.ANTLT	-0.073048	LEAF.P1	ANTLT	P1
LEAF	LIGLT	0.3269	LEAF.LIGLT	0.0794791	LEAF.P1	LIGLT	P1
LEAF	PANBASE	0.1485	LEAF.PANBASE	-0.167583	LEAF.P1	PANBASE	P1
LEAF	UNFILLED	0.9304	LEAF.UNFILLED	-0.0952955	LEAF.P1	UNFILLED	P1
LEAF	DTHD	0.1733	LEAF.DTHD	0.0926626	LEAF.P1	DTHD	P1
LEAF	CUDI	0.3065	LEAF.CUDI	0.0746175	LEAF.P1	CUDI	P1
LEAF	CULT	0.4778	LEAF.CULT	0.0580486	LEAF.P1	CULT	P1
LEAF	DIST	0.7049	LEAF.DIST	0.061911	LEAF.P1	DIST	P1
LEAF	PNLG	0.3993	LEAF.PNLG	0.00477181	LEAF.P1	PNLG	P1
LEAF	FLFWD	0.5016	LEAF.FLFWD	0.0968238	LEAF.P1	FLFWD	P1
LEAF	2LWD	0.3918	LEAF.2LWD	0.0626682	LEAF.P1	2LWD	P1
LEAF	SPKLT	0.3931	LEAF.SPKLT	0.111771	LEAF.P1	SPKLT	P1
LEAF	STLWD	0.2744	LEAF.STLWD	0.0676261	LEAF.P1	STLWD	P1
LEAF	SPKWD	0.0283	LEAF.SPKWD	0.116642	LEAF.P1	SPKWD	P1
LEAF	STLLT	0.2343	LEAF.STLLT	0.0755725	LEAF.P1	STLLT	P1
LEAF	STYLT	0.0293	LEAF.STYLT	0.165317	LEAF.P1	STYLT	P1
LEAF	AWNLT	0.7699	LEAF.AWNLT	0.104874	LEAF.P1	AWNLT	P1
LEAF	AWNWD	0.2033	LEAF.AWNWD	0.0243449	LEAF.P1	AWNWD	P1
LEAF	STGLT	0.1947	LEAF.STGLT	-0.12559	LEAF.P1	STGLT	P1
LEAF	PAN2BR	0.4788	LEAF.PAN2BR	-0.0815325	LEAF.P1	PAN2BR	P1
PANEXS	FERT	0.0773	PANEXS.FERT	0.202952	PANEXS.P1	FERT	P1
PANEXS	FLFLG	0.2142	PANEXS.FLFLG	-0.0476425	PANEXS.P1	FLFLG	P1
PANEXS	2LLT	0.1397	PANEXS.2LLT	0.0185808	PANEXS.P1	2LLT	P1
PANEXS	ANTLT	0.4515	PANEXS.ANTLT	0.0561018	PANEXS.P1	ANTLT	P1
PANEXS	LIGLT	0.3156	PANEXS.LIGLT	0.106641	PANEXS.P1	LIGLT	P1
PANEXS	PANBASE	0.6083	PANEXS.PANBASE	0.138967	PANEXS.P1	PANBASE	P1
PANEXS	UNFILLED	0.2404	PANEXS.UNFILLED	-0.0729115	PANEXS.P1	UNFILLED	P1
PANEXS	DTHD	0.1711	PANEXS.DTHD	-0.0328046	PANEXS.P1	DTHD	P1
PANEXS	CUDI	0.5716	PANEXS.CUDI	-0.0225318	PANEXS.P1	CUDI	P1
PANEXS	CULT	0.099	PANEXS.CULT	0.0967865	PANEXS.P1	CULT	P1
PANEXS	DIST	0.6148	PANEXS.DIST	0.0659637	PANEXS.P1	DIST	P1
PANEXS	PNLG	0.7885	PANEXS.PNLG	0.0597009	PANEXS.P1	PNLG	P1
PANEXS	FLFWD	0.3374	PANEXS.FLFWD	0.147376	PANEXS.P1	FLFWD	P1
PANEXS	2LWD	0.4023	PANEXS.2LWD	0.118772	PANEXS.P1	2LWD	P1
PANEXS	SPKLT	0.8598	PANEXS.SPKLT	0.00212972	PANEXS.P1	SPKLT	P1
PANEXS	STLWD	0.9365	PANEXS.STLWD	-0.0937759	PANEXS.P1	STLWD	P1
PANEXS	SPKWD	0.2055	PANEXS.SPKWD	0.0283452	PANEXS.P1	SPKWD	P1
PANEXS	STLLT	0.1311	PANEXS.STLLT	-0.152493	PANEXS.P1	STLLT	P1
PANEXS	STYLT	0.9442	PANEXS.STYLT	-0.0185229	PANEXS.P1	STYLT	P1
PANEXS	AWNLT	0.8791	PANEXS.AWNLT	-0.0801685	PANEXS.P1	AWNLT	P1
PANEXS	AWNWD	0.9228	PANEXS.AWNWD	-0.0587349	PANEXS.P1	AWNWD	P1
PANEXS	STGLT	0.8244	PANEXS.STGLT	-0.0269098	PANEXS.P1	STGLT	P1
PANEXS	PAN2BR	0.4968	PANEXS.PAN2BR	-0.0463064	PANEXS.P1	PAN2BR	P1
PANEXS	LEAF	0.7455	PANEXS.LEAF	0.17082	PANEXS.P1	LEAF	P1
CUHABIT	FERT	0.0863	CUHABIT.FERT	-0.160537	CUHABIT.P1	FERT	P1
CUHABIT	FLFLG	0.3399	CUHABIT.FLFLG	-0.226478	CUHABIT.P1	FLFLG	P1
CUHABIT	2LLT	0.1435	CUHABIT.2LLT	-0.22322	CUHABIT.P1	2LLT	P1
CUHABIT	ANTLT	0.163	CUHABIT.ANTLT	-0.158332	CUHABIT.P1	ANTLT	P1
CUHABIT	LIGLT	0.5391	CUHABIT.LIGLT	-0.1512	CUHABIT.P1	LIGLT	P1
CUHABIT	PANBASE	0.4187	CUHABIT.PANBASE	0.045522	CUHABIT.P1	PANBASE	P1
CUHABIT	UNFILLED	0.1053	CUHABIT.UNFILLED	0.0576267	CUHABIT.P1	UNFILLED	P1
CUHABIT	DTHD	0.2836	CUHABIT.DTHD	0.105401	CUHABIT.P1	DTHD	P1
CUHABIT	CUDI	0.7768	CUHABIT.CUDI	0.111611	CUHABIT.P1	CUDI	P1
CUHABIT	CULT	0.2116	CUHABIT.CULT	-0.0528171	CUHABIT.P1	CULT	P1
CUHABIT	DIST	0.0368	CUHABIT.DIST	-0.0446066	CUHABIT.P1	DIST	P1
CUHABIT	PNLG	0.1409	CUHABIT.PNLG	-0.0410663	CUHABIT.P1	PNLG	P1
CUHABIT	FLFWD	0.8512	CUHABIT.FLFWD	-0.167359	CUHABIT.P1	FLFWD	P1
CUHABIT	2LWD	0.8142	CUHABIT.2LWD	-0.144405	CUHABIT.P1	2LWD	P1
CUHABIT	SPKLT	0.1733	CUHABIT.SPKLT	0.0525505	CUHABIT.P1	SPKLT	P1
CUHABIT	STLWD	0.839	CUHABIT.STLWD	-0.081505	CUHABIT.P1	STLWD	P1
CUHABIT	SPKWD	0.0349	CUHABIT.SPKWD	0.0858828	CUHABIT.P1	SPKWD	P1
CUHABIT	STLLT	0.035	CUHABIT.STLLT	0.0703779	CUHABIT.P1	STLLT	P1
CUHABIT	STYLT	0.7393	CUHABIT.STYLT	-0.0245787	CUHABIT.P1	STYLT	P1
CUHABIT	AWNLT	0.3527	CUHABIT.AWNLT	0.0599183	CUHABIT.P1	AWNLT	P1
CUHABIT	AWNWD	0.2965	CUHABIT.AWNWD	0.0681665	CUHABIT.P1	AWNWD	P1
CUHABIT	STGLT	0.4201	CUHABIT.STGLT	-0.0864521	CUHABIT.P1	STGLT	P1
CUHABIT	PAN2BR	0.6139	CUHABIT.PAN2BR	-0.257219	CUHABIT.P1	PAN2BR	P1
CUHABIT	LEAF	0.1917	CUHABIT.LEAF	0.116385	CUHABIT.P1	LEAF	P1
CUHABIT	PANEXS	0.2039	CUHABIT.PANEXS	-0.0227601	CUHABIT.P1	PANEXS	P1
CUHABIT_VEG	FERT	0.6464	CUHABIT_VEG.FERT	-0.150928	CUHABIT_VEG.P1	FERT	P1
CUHABIT_VEG	FLFLG	0.3139	CUHABIT_VEG.FLFLG	-0.191796	CUHABIT_VEG.P1	FLFLG	P1
CUHABIT_VEG	2LLT	0.2731	CUHABIT_VEG.2LLT	-0.105713	CUHABIT_VEG.P1	2LLT	P1
CUHABIT_VEG	ANTLT	0.0583	CUHABIT_VEG.ANTLT	0.0551477	CUHABIT_VEG.P1	ANTLT	P1
CUHABIT_VEG	LIGLT	0.7566	CUHABIT_VEG.LIGLT	0.00508772	CUHABIT_VEG.P1	LIGLT	P1
CUHABIT_VEG	PANBASE	0.5743	CUHABIT_VEG.PANBASE	0.0652413	CUHABIT_VEG.P1	PANBASE	P1
CUHABIT_VEG	UNFILLED	0.3799	CUHABIT_VEG.UNFILLED	0.111192	CUHABIT_VEG.P1	UNFILLED	P1
CUHABIT_VEG	DTHD	0.6036	CUHABIT_VEG.DTHD	0.10877	CUHABIT_VEG.P1	DTHD	P1
CUHABIT_VEG	CUDI	0.2039	CUHABIT_VEG.CUDI	0.0231659	CUHABIT_VEG.P1	CUDI	P1
CUHABIT_VEG	CULT	0.3491	CUHABIT_VEG.CULT	0.0384373	CUHABIT_VEG.P1	CULT	P1
CUHABIT_VEG	DIST	0.2129	CUHABIT_VEG.DIST	0.0772837	CUHABIT_VEG.P1	DIST	P1
CUHABIT_VEG	PNLG	0.1639	CUHABIT_VEG.PNLG	0.0094694	CUHABIT_VEG.P1	PNLG	P1
CUHABIT_VEG	FLFWD	0.254	CUHABIT_VEG.FLFWD	0.073229	CUHABIT_VEG.P1	FLFWD	P1
CUHABIT_VEG	2LWD	0.7596	CUHABIT_VEG.2LWD	0.065583	CUHABIT_VEG.P1	2LWD	P1
CUHABIT_VEG	SPKLT	0.8201	CUHABIT_VEG.SPKLT	-0.00119297	CUHABIT_VEG.P1	SPKLT	P1
CUHABIT_VEG	STLWD	0.1013	CUHABIT_VEG.STLWD	-0.0259064	CUHABIT_VEG.P1	STLWD	P1
CUHABIT_VEG	SPKWD	0.3284	CUHABIT_VEG.SPKWD	0.0150853	CUHABIT_VEG.P1	SPKWD	P1
CUHABIT_VEG	STLLT	0.6071	CUHABIT_VEG.STLLT	-0.0538833	CUHABIT_VEG.P1	STLLT	P1
CUHABIT_VEG	STYLT	0.581	CUHABIT_VEG.STYLT	-0.124657	CUHABIT_VEG.P1	STYLT	P1
CUHABIT_VEG	AWNLT	0.0165	CUHABIT_VEG.AWNLT	-0.214456	CUHABIT_VEG.P1	AWNLT	P1
CUHABIT_VEG	AWNWD	0.9755	CUHABIT_VEG.AWNWD	0.0573473	CUHABIT_VEG.P1	AWNWD	P1
CUHABIT_VEG	STGLT	0.4089	CUHABIT_VEG.STGLT	-0.0317914	CUHABIT_VEG.P1	STGLT	P1
CUHABIT_VEG	PAN2BR	0.5006	CUHABIT_VEG.PAN2BR	-0.322906	CUHABIT_VEG.P1	PAN2BR	P1
CUHABIT_VEG	LEAF	0.5117	CUHABIT_VEG.LEAF	0.00839901	CUHABIT_VEG.P1	LEAF	P1
CUHABIT_VEG	PANEXS	0.8076	CUHABIT_VEG.PANEXS	0.0954741	CUHABIT_VEG.P1	PANEXS	P1
CUHABIT_VEG	CUHABIT	0.0974	CUHABIT_VEG.CUHABIT	0.292039	CUHABIT_VEG.P1	CUHABIT	P1
FLAGATT	FERT	0.6863	FLAGATT.FERT	0.0853835	FLAGATT.P1	FERT	P1
FLAGATT	FLFLG	0.6968	FLAGATT.FLFLG	-0.149247	FLAGATT.P1	FLFLG	P1
FLAGATT	2LLT	0.1129	FLAGATT.2LLT	-0.193714	FLAGATT.P1	2LLT	P1
FLAGATT	ANTLT	0.9618	FLAGATT.ANTLT	0.0512206	FLAGATT.P1	ANTLT	P1
FLAGATT	LIGLT	0.3224	FLAGATT.LIGLT	-0.236002	FLAGATT.P1	LIGLT	P1
FLAGATT	PANBASE	0.5477	FLAGATT.PANBASE	0.0678328	FLAGATT.P1	PANBASE	P1
FLAGATT	UNFILLED	0.3038	FLAGATT.UNFILLED	-0.0711062	FLAGATT.P1	UNFILLED	P1
FLAGATT	DTHD	0.8193	FLAGATT.DTHD	0.0856685	FLAGATT.P1	DTHD	P1
FLAGATT	CUDI	0.4901	FLAGATT.CUDI	-0.0130994	FLAGATT.P1	CUDI	P1
FLAGATT	CULT	0.2179	FLAGATT.CULT	-0.0409033	FLAGATT.P1	CULT	P1
FLAGATT	DIST	0.1633	FLAGATT.DIST	-0.146078	FLAGATT.P1	DIST	P1
FLAGATT	PNLG	0.383	FLAGATT.PNLG	-0.109494	FLAGATT.P1	PNLG	P1
FLAGATT	FLFWD	0.4	FLAGATT.FLFWD	-0.00823751	FLAGATT.P1	FLFWD	P1
FLAGATT	2LWD	0.5743	FLAGATT.2LWD	0.076389	FLAGATT.P1	2LWD	P1
FLAGATT	SPKLT	0.5676	FLAGATT.SPKLT	-0.00943049	FLAGATT.P1	SPKLT	P1
FLAGATT	STLWD	0.4915	FLAGATT.STLWD	0.028274	FLAGATT.P1	STLWD	P1
FLAGATT	SPKWD	0.2887	FLAGATT.SPKWD	-0.0263928	FLAGATT.P1	SPKWD	P1
FLAGATT	STLLT	0.8064	FLAGATT.STLLT	0.0454321	FLAGATT.P1	STLLT	P1
FLAGATT	STYLT	0.9388	FLAGATT.STYLT	0.0790365	FLAGATT.P1	STYLT	P1
FLAGATT	AWNLT	0.3296	FLAGATT.AWNLT	-0.0225532	FLAGATT.P1	AWNLT	P1
FLAGATT	AWNWD	0.8698	FLAGATT.AWNWD	-0.202149	FLAGATT.P1	AWNWD	P1
FLAGATT	STGLT	0.8964	FLAGATT.STGLT	0.0115625	FLAGATT.P1	STGLT	P1
FLAGATT	PAN2BR	0.9753	FLAGATT.PAN2BR	-0.170539	FLAGATT.P1	PAN2BR	P1
FLAGATT	LEAF	0.8341	FLAGATT.LEAF	0.172478	FLAGATT.P1	LEAF	P1
FLAGATT	PANEXS	0.5439	FLAGATT.PANEXS	0.138627	FLAGATT.P1	PANEXS	P1
FLAGATT	CUHABIT	0.633	FLAGATT.CUHABIT	0.2479	FLAGATT.P1	CUHABIT	P1
FLAGATT	CUHABIT_VEG	0.2514	FLAGATT.CUHABIT_VEG	-0.0416093	FLAGATT.P1	CUHABIT_VEG	P1
PANTYPE	FERT	0.9915	PANTYPE.FERT	-0.0666107	PANTYPE.P1	FERT	P1
PANTYPE	FLFLG	0.1432	PANTYPE.FLFLG	-0.296348	PANTYPE.P1	FLFLG	P1
PANTYPE	2LLT	0.2156	PANTYPE.2LLT	-0.156868	PANTYPE.P1	2LLT	P1
PANTYPE	ANTLT	0.8049	PANTYPE.ANTLT	0.00393585	PANTYPE.P1	ANTLT	P1
PANTYPE	LIGLT	0.3334	PANTYPE.LIGLT	-0.115282	PANTYPE.P1	LIGLT	P1
PANTYPE	PANBASE	0.6782	PANTYPE.PANBASE	-0.00915626	PANTYPE.P1	PANBASE	P1
PANTYPE	UNFILLED	0.9993	PANTYPE.UNFILLED	0.0826039	PANTYPE.P1	UNFILLED	P1
PANTYPE	DTHD	0.3091	PANTYPE.DTHD	0.178661	PANTYPE.P1	DTHD	P1
PANTYPE	CUDI	0.5628	PANTYPE.CUDI	0.113675	PANTYPE.P1	CUDI	P1
PANTYPE	CULT	0.1658	PANTYPE.CULT	0.108222	PANTYPE.P1	CULT	P1
PANTYPE	DIST	0.9614	PANTYPE.DIST	0.0606742	PANTYPE.P1	DIST	P1
PANTYPE	PNLG	0.7564	PANTYPE.PNLG	-0.0121994	PANTYPE.P1	PNLG	P1
PANTYPE	FLFWD	0.5875	PANTYPE.FLFWD	0.0783892	PANTYPE.P1	FLFWD	P1
PANTYPE	2LWD	0.1469	PANTYPE.2LWD	0.103992	PANTYPE.P1	2LWD	P1
PANTYPE	SPKLT	0.7432	PANTYPE.SPKLT	-0.0766939	PANTYPE.P1	SPKLT	P1
PANTYPE	STLWD	0.6581	PANTYPE.STLWD	-0.0928428	PANTYPE.P1	STLWD	P1
PANTYPE	SPKWD	0.3843	PANTYPE.SPKWD	-0.0492725	PANTYPE.P1	SPKWD	P1
PANTYPE	STLLT	0.7573	PANTYPE.STLLT	0.0819034	PANTYPE.P1	STLLT	P1
PANTYPE	STYLT	0.883	PANTYPE.STYLT	-0.00260985	PANTYPE.P1	STYLT	P1
PANTYPE	AWNLT	0.6586	PANTYPE.AWNLT	-0.100363	PANTYPE.P1	AWNLT	P1
PANTYPE	AWNWD	0.713	PANTYPE.AWNWD	0.0652486	PANTYPE.P1	AWNWD	P1
PANTYPE	STGLT	0.3978	PANTYPE.STGLT	-0.000232231	PANTYPE.P1	STGLT	P1
PANTYPE	PAN2BR	0.069	PANTYPE.PAN2BR	-0.352898	PANTYPE.P1	PAN2BR	P1
PANTYPE	LEAF	0.4487	PANTYPE.LEAF	0.167068	PANTYPE.P1	LEAF	P1
PANTYPE	PANEXS	0.8584	PANTYPE.PANEXS	0.165529	PANTYPE.P1	PANEXS	P1
PANTYPE	CUHABIT	0.0511	PANTYPE.CUHABIT	0.29954	PANTYPE.P1	CUHABIT	P1
PANTYPE	CUHABIT_VEG	0.0995	PANTYPE.CUHABIT_VEG	0.1531	PANTYPE.P1	CUHABIT_VEG	P1
PANTYPE	FLAGATT	0.5448	PANTYPE.FLAGATT	0.360064	PANTYPE.P1	FLAGATT	P1
PAMB	FERT	0.0194	PAMB.FERT	0.0764244	PAMB.P1	FERT	P1
PAMB	FLFLG	0.4918	PAMB.FLFLG	0.0188587	PAMB.P1	FLFLG	P1
PAMB	2LLT	0.808	PAMB.2LLT	-0.0525425	PAMB.P1	2LLT	P1
PAMB	ANTLT	0.0902	PAMB.ANTLT	-0.212677	PAMB.P1	ANTLT	P1
PAMB	LIGLT	0.0899	PAMB.LIGLT	-0.022544	PAMB.P1	LIGLT	P1
PAMB	PANBASE	0.7526	PAMB.PANBASE	-0.0311513	PAMB.P1	PANBASE	P1
PAMB	UNFILLED	0.1052	PAMB.UNFILLED	-0.0262048	PAMB.P1	UNFILLED	P1
PAMB	DTHD	0.1208	PAMB.DTHD	0.0837396	PAMB.P1	DTHD	P1
PAMB	CUDI	0.2719	PAMB.CUDI	0.0574098	PAMB.P1	CUDI	P1
PAMB	CULT	0.465	PAMB.CULT	0.00318854	PAMB.P1	CULT	P1
PAMB	DIST	0.4596	PAMB.DIST	-0.0640827	PAMB.P1	DIST	P1
PAMB	PNLG	0.8985	PAMB.PNLG	-0.0879594	PAMB.P1	PNLG	P1
PAMB	FLFWD	0.8503	PAMB.FLFWD	0.104796	PAMB.P1	FLFWD	P1
PAMB	2LWD	0.9288	PAMB.2LWD	0.114556	PAMB.P1	2LWD	P1
PAMB	SPKLT	0.2824	PAMB.SPKLT	-0.161552	PAMB.P1	SPKLT	P1
PAMB	STLWD	0.7955	PAMB.STLWD	0.168195	PAMB.P1	STLWD	P1
PAMB	SPKWD	0.911	PAMB.SPKWD	0.120792	PAMB.P1	SPKWD	P1
PAMB	STLLT	0.8271	PAMB.STLLT	0.0127743	PAMB.P1	STLLT	P1
PAMB	STYLT	0.6602	PAMB.STYLT	-0.0484625	PAMB.P1	STYLT	P1
PAMB	AWNLT	0.5005	PAMB.AWNLT	-0.269932	PAMB.P1	AWNLT	P1
PAMB	AWNWD	0.7971	PAMB.AWNWD	-0.152871	PAMB.P1	AWNWD	P1
PAMB	STGLT	0.1965	PAMB.STGLT	-0.244903	PAMB.P1	STGLT	P1
PAMB	PAN2BR	0.5622	PAMB.PAN2BR	0.0515503	PAMB.P1	PAN2BR	P1
PAMB	LEAF	0.0339	PAMB.LEAF	0.0352453	PAMB.P1	LEAF	P1
PAMB	PANEXS	0.5212	PAMB.PANEXS	-0.0709306	PAMB.P1	PANEXS	P1
PAMB	CUHABIT	0.4568	PAMB.CUHABIT	0.106568	PAMB.P1	CUHABIT	P1
PAMB	CUHABIT_VEG	0.9042	PAMB.CUHABIT_VEG	-0.0604717	PAMB.P1	CUHABIT_VEG	P1
PAMB	FLAGATT	0.3236	PAMB.FLAGATT	0.183616	PAMB.P1	FLAGATT	P1
PAMB	PANTYPE	0.768	PAMB.PANTYPE	0.130764	PAMB.P1	PANTYPE	P1
CUNO	FERT	0.9603	CUNO.FERT	-0.083436	CUNO.P1	FERT	P1
CUNO	FLFLG	0.9117	CUNO.FLFLG	-0.0468447	CUNO.P1	FLFLG	P1
CUNO	2LLT	0.2664	CUNO.2LLT	0.0125649	CUNO.P1	2LLT	P1
CUNO	ANTLT	0.0938	CUNO.ANTLT	0.19732	CUNO.P1	ANTLT	P1
CUNO	LIGLT	0.024	CUNO.LIGLT	-0.326833	CUNO.P1	LIGLT	P1
CUNO	PANBASE	0.385	CUNO.PANBASE	-0.00277579	CUNO.P1	PANBASE	P1
CUNO	UNFILLED	0.8306	CUNO.UNFILLED	0.115882	CUNO.P1	UNFILLED	P1
CUNO	DTHD	0.0222	CUNO.DTHD	-0.105549	CUNO.P1	DTHD	P1
CUNO	CUDI	0.0031	CUNO.CUDI	-0.15951	CUNO.P1	CUDI	P1
CUNO	CULT	0.079	CUNO.CULT	0.0794634	CUNO.P1	CULT	P1
CUNO	DIST	0.0816	CUNO.DIST	0.0636335	CUNO.P1	DIST	P1
CUNO	PNLG	0.5191	CUNO.PNLG	-0.0314893	CUNO.P1	PNLG	P1
CUNO	FLFWD	0.794	CUNO.FLFWD	-0.0731097	CUNO.P1	FLFWD	P1
CUNO	2LWD	0.2927	CUNO.2LWD	-0.0068379	CUNO.P1	2LWD	P1
CUNO	SPKLT	0.123	CUNO.SPKLT	-0.291507	CUNO.P1	SPKLT	P1
CUNO	STLWD	0.428	CUNO.STLWD	-0.23928	CUNO.P1	STLWD	P1
CUNO	SPKWD	0.3257	CUNO.SPKWD	-0.273212	CUNO.P1	SPKWD	P1
CUNO	STLLT	0.1127	CUNO.STLLT	-0.193501	CUNO.P1	STLLT	P1
CUNO	STYLT	0.0897	CUNO.STYLT	-0.167565	CUNO.P1	STYLT	P1
CUNO	AWNLT	0.0386	CUNO.AWNLT	-0.409583	CUNO.P1	AWNLT	P1
CUNO	AWNWD	0.1085	CUNO.AWNWD	-0.0290638	CUNO.P1	AWNWD	P1
CUNO	STGLT	0.4588	CUNO.STGLT	0.000969878	CUNO.P1	STGLT	P1
CUNO	PAN2BR	0.0657	CUNO.PAN2BR	-0.142917	CUNO.P1	PAN2BR	P1
CUNO	LEAF	0.5503	CUNO.LEAF	-0.116242	CUNO.P1	LEAF	P1
CUNO	PANEXS	0.0898	CUNO.PANEXS	0.117733	CUNO.P1	PANEXS	P1
CUNO	CUHABIT	0.1292	CUNO.CUHABIT	-0.19952	CUNO.P1	CUHABIT	P1
CUNO	CUHABIT_VEG	0.3034	CUNO.CUHABIT_VEG	0.0919776	CUNO.P1	CUHABIT_VEG	P1
CUNO	FLAGATT	0.412	CUNO.FLAGATT	-0.071725	CUNO.P1	FLAGATT	P1
CUNO	PANTYPE	0.0889	CUNO.PANTYPE	0.302783	CUNO.P1	PANTYPE	P1
CUNO	PAMB	0.6068	CUNO.PAMB	-0.0322259	CUNO.P1	PAMB	P1
PNNB	FERT	0.752	PNNB.FERT	0.158831	PNNB.P1	FERT	P1
PNNB	FLFLG	0.8333	PNNB.FLFLG	-0.120741	PNNB.P1	FLFLG	P1
PNNB	2LLT	0.5422	PNNB.2LLT	-0.137952	PNNB.P1	2LLT	P1
PNNB	ANTLT	0.0314	PNNB.ANTLT	0.207936	PNNB.P1	ANTLT	P1
PNNB	LIGLT	0.3135	PNNB.LIGLT	-0.195262	PNNB.P1	LIGLT	P1
PNNB	PANBASE	0.7659	PNNB.PANBASE	-0.136592	PNNB.P1	PANBASE	P1
PNNB	UNFILLED	0.2528	PNNB.UNFILLED	-0.102637	PNNB.P1	UNFILLED	P1
PNNB	DTHD	0.0129	PNNB.DTHD	0.125797	PNNB.P1	DTHD	P1
PNNB	CUDI	0.0065	PNNB.CUDI	-0.183793	PNNB.P1	CUDI	P1
PNNB	CULT	0.2413	PNNB.CULT	0.0900194	PNNB.P1	CULT	P1
PNNB	DIST	0.1486	PNNB.DIST	-0.09193	PNNB.P1	DIST	P1
PNNB	PNLG	0.7975	PNNB.PNLG	-0.0114429	PNNB.P1	PNLG	P1
PNNB	FLFWD	0.325	PNNB.FLFWD	-0.0542958	PNNB.P1	FLFWD	P1
PNNB	2LWD	0.1294	PNNB.2LWD	-0.0202225	PNNB.P1	2LWD	P1
PNNB	SPKLT	0.4184	PNNB.SPKLT	-0.116155	PNNB.P1	SPKLT	P1
PNNB	STLWD	0.3157	PNNB.STLWD	-0.157326	PNNB.P1	STLWD	P1
PNNB	SPKWD	0.0634	PNNB.SPKWD	-0.179554	PNNB.P1	SPKWD	P1
PNNB	STLLT	0.3566	PNNB.STLLT	-0.0767165	PNNB.P1	STLLT	P1
PNNB	STYLT	0.6923	PNNB.STYLT	-0.0131726	PNNB.P1	STYLT	P1
PNNB	AWNLT	0.9938	PNNB.AWNLT	-0.344477	PNNB.P1	AWNLT	P1
PNNB	AWNWD	0.2913	PNNB.AWNWD	-0.049556	PNNB.P1	AWNWD	P1
PNNB	STGLT	0.5404	PNNB.STGLT	0.0235418	PNNB.P1	STGLT	P1
PNNB	PAN2BR	0.0195	PNNB.PAN2BR	-0.10485	PNNB.P1	PAN2BR	P1
PNNB	LEAF	0.1852	PNNB.LEAF	-0.0522671	PNNB.P1	LEAF	P1
PNNB	PANEXS	0.0646	PNNB.PANEXS	0.0168017	PNNB.P1	PANEXS	P1
PNNB	CUHABIT	0.0166	PNNB.CUHABIT	-0.175855	PNNB.P1	CUHABIT	P1
PNNB	CUHABIT_VEG	0.5773	PNNB.CUHABIT_VEG	0.0293044	PNNB.P1	CUHABIT_VEG	P1
PNNB	FLAGATT	0.2047	PNNB.FLAGATT	-0.0660135	PNNB.P1	FLAGATT	P1
PNNB	PANTYPE	0.0042	PNNB.PANTYPE	0.21658	PNNB.P1	PANTYPE	P1
PNNB	PAMB	0.2308	PNNB.PAMB	-0.0230887	PNNB.P1	PAMB	P1
PNNB	CUNO	0.114	PNNB.CUNO	0.527588	PNNB.P1	CUNO	P1
		1	FERT.FERT	0	FERT.P2/P3	FERT	P2/P3
FLFLG	FERT	0.6934	FLFLG.FERT	0.120973	FLFLG.P2/P3	FERT	P2/P3
		1	FLFLG.FLFLG	0	FLFLG.P2/P3	FLFLG	P2/P3
2LLT	FERT	0.1149	2LLT.FERT	0.101231	2LLT.P2/P3	FERT	P2/P3
2LLT	FLFLG	0.0342	2LLT.FLFLG	0.619553	2LLT.P2/P3	FLFLG	P2/P3
		1	2LLT.2LLT	0	2LLT.P2/P3	2LLT	P2/P3
ANTLT	FERT	0.019	ANTLT.FERT	-0.435922	ANTLT.P2/P3	FERT	P2/P3
ANTLT	FLFLG	0.2208	ANTLT.FLFLG	-0.232222	ANTLT.P2/P3	FLFLG	P2/P3
ANTLT	2LLT	0.0263	ANTLT.2LLT	-0.420829	ANTLT.P2/P3	2LLT	P2/P3
		1	ANTLT.ANTLT	0	ANTLT.P2/P3	ANTLT	P2/P3
LIGLT	FERT	0.2806	LIGLT.FERT	-0.2323	LIGLT.P2/P3	FERT	P2/P3
LIGLT	FLFLG	0.5225	LIGLT.FLFLG	0.06902	LIGLT.P2/P3	FLFLG	P2/P3
LIGLT	2LLT	0.9619	LIGLT.2LLT	0.451844	LIGLT.P2/P3	2LLT	P2/P3
LIGLT	ANTLT	0.0009	LIGLT.ANTLT	-0.0822809	LIGLT.P2/P3	ANTLT	P2/P3
		1	LIGLT.LIGLT	0	LIGLT.P2/P3	LIGLT	P2/P3
PANBASE	FERT	0.9298	PANBASE.FERT	-0.194503	PANBASE.P2/P3	FERT	P2/P3
PANBASE	FLFLG	0.2326	PANBASE.FLFLG	0.196312	PANBASE.P2/P3	FLFLG	P2/P3
PANBASE	2LLT	0.6085	PANBASE.2LLT	0.193257	PANBASE.P2/P3	2LLT	P2/P3
PANBASE	ANTLT	0.2813	PANBASE.ANTLT	0.0419805	PANBASE.P2/P3	ANTLT	P2/P3
PANBASE	LIGLT	0.0491	PANBASE.LIGLT	0.0956917	PANBASE.P2/P3	LIGLT	P2/P3
		1	PANBASE.PANBASE	0	PANBASE.P2/P3	PANBASE	P2/P3
UNFILLED	FERT	0.3236	UNFILLED.FERT	-0.751895	UNFILLED.P2/P3	FERT	P2/P3
UNFILLED	FLFLG	0.9851	UNFILLED.FLFLG	0.248125	UNFILLED.P2/P3	FLFLG	P2/P3
UNFILLED	2LLT	0.3214	UNFILLED.2LLT	0.159966	UNFILLED.P2/P3	2LLT	P2/P3
UNFILLED	ANTLT	0.0057	UNFILLED.ANTLT	0.14016	UNFILLED.P2/P3	ANTLT	P2/P3
UNFILLED	LIGLT	0.8087	UNFILLED.LIGLT	0.222311	UNFILLED.P2/P3	LIGLT	P2/P3
UNFILLED	PANBASE	0.5577	UNFILLED.PANBASE	0.132312	UNFILLED.P2/P3	PANBASE	P2/P3
		1	UNFILLED.UNFILLED	0	UNFILLED.P2/P3	UNFILLED	P2/P3
DTHD	FERT	0.353	DTHD.FERT	-0.12702	DTHD.P2/P3	FERT	P2/P3
DTHD	FLFLG	0.0135	DTHD.FLFLG	-0.353557	DTHD.P2/P3	FLFLG	P2/P3
DTHD	2LLT	0.0744	DTHD.2LLT	-0.063737	DTHD.P2/P3	2LLT	P2/P3
DTHD	ANTLT	0.003	DTHD.ANTLT	0.0495515	DTHD.P2/P3	ANTLT	P2/P3
DTHD	LIGLT	0.0072	DTHD.LIGLT	0.300523	DTHD.P2/P3	LIGLT	P2/P3
DTHD	PANBASE	0.0272	DTHD.PANBASE	-0.151817	DTHD.P2/P3	PANBASE	P2/P3
DTHD	UNFILLED	0.513	DTHD.UNFILLED	-0.0928986	DTHD.P2/P3	UNFILLED	P2/P3
		1	DTHD.DTHD	0	DTHD.P2/P3	DTHD	P2/P3
CUDI	FERT	0.0006	CUDI.FERT	0.303728	CUDI.P2/P3	FERT	P2/P3
CUDI	FLFLG	0.3655	CUDI.FLFLG	-0.0511183	CUDI.P2/P3	FLFLG	P2/P3
CUDI	2LLT	0.034	CUDI.2LLT	0.219571	CUDI.P2/P3	2LLT	P2/P3
CUDI	ANTLT	0.0018	CUDI.ANTLT	-0.224938	CUDI.P2/P3	ANTLT	P2/P3
CUDI	LIGLT	0.0984	CUDI.LIGLT	0.382743	CUDI.P2/P3	LIGLT	P2/P3
CUDI	PANBASE	0.008	CUDI.PANBASE	-0.184711	CUDI.P2/P3	PANBASE	P2/P3
CUDI	UNFILLED	0.0001	CUDI.UNFILLED	-0.155847	CUDI.P2/P3	UNFILLED	P2/P3
CUDI	DTHD	0.6109	CUDI.DTHD	0.449965	CUDI.P2/P3	DTHD	P2/P3
		1	CUDI.CUDI	0	CUDI.P2/P3	CUDI	P2/P3
CULT	FERT	0.0079	CULT.FERT	-0.0982325	CULT.P2/P3	FERT	P2/P3
CULT	FLFLG	0.0377	CULT.FLFLG	-0.1234	CULT.P2/P3	FLFLG	P2/P3
CULT	2LLT	0.0642	CULT.2LLT	0.256854	CULT.P2/P3	2LLT	P2/P3
CULT	ANTLT	0.0003	CULT.ANTLT	0.000476856	CULT.P2/P3	ANTLT	P2/P3
CULT	LIGLT	0.0238	CULT.LIGLT	0.403329	CULT.P2/P3	LIGLT	P2/P3
CULT	PANBASE	0.1229	CULT.PANBASE	-0.184686	CULT.P2/P3	PANBASE	P2/P3
CULT	UNFILLED	0.0447	CULT.UNFILLED	-0.0228027	CULT.P2/P3	UNFILLED	P2/P3
CULT	DTHD	0.0846	CULT.DTHD	0.787334	CULT.P2/P3	DTHD	P2/P3
CULT	CUDI	0.9621	CULT.CUDI	0.515032	CULT.P2/P3	CUDI	P2/P3
		1	CULT.CULT	0	CULT.P2/P3	CULT	P2/P3
DIST	FERT	0.1703	DIST.FERT	-0.435845	DIST.P2/P3	FERT	P2/P3
DIST	FLFLG	0.3138	DIST.FLFLG	-0.188704	DIST.P2/P3	FLFLG	P2/P3
DIST	2LLT	0.0017	DIST.2LLT	-0.135551	DIST.P2/P3	2LLT	P2/P3
DIST	ANTLT	0.0126	DIST.ANTLT	0.527165	DIST.P2/P3	ANTLT	P2/P3
DIST	LIGLT	0.876	DIST.LIGLT	0.188922	DIST.P2/P3	LIGLT	P2/P3
DIST	PANBASE	0.8699	DIST.PANBASE	-0.0864704	DIST.P2/P3	PANBASE	P2/P3
DIST	UNFILLED	0.3818	DIST.UNFILLED	0.244463	DIST.P2/P3	UNFILLED	P2/P3
DIST	DTHD	0.3326	DIST.DTHD	0.143386	DIST.P2/P3	DTHD	P2/P3
DIST	CUDI	0.0219	DIST.CUDI	0.0139943	DIST.P2/P3	CUDI	P2/P3
DIST	CULT	0.0104	DIST.CULT	0.131916	DIST.P2/P3	CULT	P2/P3
		1	DIST.DIST	0	DIST.P2/P3	DIST	P2/P3
PNLG	FERT	0.0147	PNLG.FERT	0.0276397	PNLG.P2/P3	FERT	P2/P3
PNLG	FLFLG	0.6652	PNLG.FLFLG	0.216131	PNLG.P2/P3	FLFLG	P2/P3
PNLG	2LLT	0.5494	PNLG.2LLT	0.409928	PNLG.P2/P3	2LLT	P2/P3
PNLG	ANTLT	0.16	PNLG.ANTLT	-0.0351348	PNLG.P2/P3	ANTLT	P2/P3
PNLG	LIGLT	0.9302	PNLG.LIGLT	0.234366	PNLG.P2/P3	LIGLT	P2/P3
PNLG	PANBASE	0.4256	PNLG.PANBASE	0.128597	PNLG.P2/P3	PANBASE	P2/P3
PNLG	UNFILLED	0.0001	PNLG.UNFILLED	-0.0650202	PNLG.P2/P3	UNFILLED	P2/P3
PNLG	DTHD	0.6717	PNLG.DTHD	0.240986	PNLG.P2/P3	DTHD	P2/P3
PNLG	CUDI	0.2274	PNLG.CUDI	0.252313	PNLG.P2/P3	CUDI	P2/P3
PNLG	CULT	0.2684	PNLG.CULT	0.467954	PNLG.P2/P3	CULT	P2/P3
PNLG	DIST	0.0085	PNLG.DIST	0.276907	PNLG.P2/P3	DIST	P2/P3
		1	PNLG.PNLG	0	PNLG.P2/P3	PNLG	P2/P3
FLFWD	FERT	0.1251	FLFWD.FERT	0.309168	FLFWD.P2/P3	FERT	P2/P3
FLFWD	FLFLG	0.2524	FLFWD.FLFLG	0.12369	FLFWD.P2/P3	FLFLG	P2/P3
FLFWD	2LLT	0.749	FLFWD.2LLT	0.154988	FLFWD.P2/P3	2LLT	P2/P3
FLFWD	ANTLT	0.0085	FLFWD.ANTLT	-0.336567	FLFWD.P2/P3	ANTLT	P2/P3
FLFWD	LIGLT	0.0003	FLFWD.LIGLT	0.0850134	FLFWD.P2/P3	LIGLT	P2/P3
FLFWD	PANBASE	0.0297	FLFWD.PANBASE	0.0733022	FLFWD.P2/P3	PANBASE	P2/P3
FLFWD	UNFILLED	0.573	FLFWD.UNFILLED	0.024503	FLFWD.P2/P3	UNFILLED	P2/P3
FLFWD	DTHD	0.0003	FLFWD.DTHD	-0.218199	FLFWD.P2/P3	DTHD	P2/P3
FLFWD	CUDI	0.0046	FLFWD.CUDI	0.299689	FLFWD.P2/P3	CUDI	P2/P3
FLFWD	CULT	0.0008	FLFWD.CULT	-0.248099	FLFWD.P2/P3	CULT	P2/P3
FLFWD	DIST	0.1511	FLFWD.DIST	-0.234781	FLFWD.P2/P3	DIST	P2/P3
FLFWD	PNLG	0.0101	FLFWD.PNLG	-0.324619	FLFWD.P2/P3	PNLG	P2/P3
		1	FLFWD.FLFWD	0	FLFWD.P2/P3	FLFWD	P2/P3
2LWD	FERT	0.0086	2LWD.FERT	0.264406	2LWD.P2/P3	FERT	P2/P3
2LWD	FLFLG	0.0198	2LWD.FLFLG	-0.125152	2LWD.P2/P3	FLFLG	P2/P3
2LWD	2LLT	0.552	2LWD.2LLT	0.152232	2LWD.P2/P3	2LLT	P2/P3
2LWD	ANTLT	0.0016	2LWD.ANTLT	-0.320892	2LWD.P2/P3	ANTLT	P2/P3
2LWD	LIGLT	0.3509	2LWD.LIGLT	0.238081	2LWD.P2/P3	LIGLT	P2/P3
2LWD	PANBASE	0.2529	2LWD.PANBASE	-0.0973996	2LWD.P2/P3	PANBASE	P2/P3
2LWD	UNFILLED	0.0456	2LWD.UNFILLED	-0.0256208	2LWD.P2/P3	UNFILLED	P2/P3
2LWD	DTHD	0.0024	2LWD.DTHD	0.0702409	2LWD.P2/P3	DTHD	P2/P3
2LWD	CUDI	0.1394	2LWD.CUDI	0.483448	2LWD.P2/P3	CUDI	P2/P3
2LWD	CULT	0.0028	2LWD.CULT	0.0154575	2LWD.P2/P3	CULT	P2/P3
2LWD	DIST	0.2369	2LWD.DIST	-0.129265	2LWD.P2/P3	DIST	P2/P3
2LWD	PNLG	0.05	2LWD.PNLG	-0.187131	2LWD.P2/P3	PNLG	P2/P3
2LWD	FLFWD	0.2648	2LWD.FLFWD	0.822003	2LWD.P2/P3	FLFWD	P2/P3
		1	2LWD.2LWD	0	2LWD.P2/P3	2LWD	P2/P3
SPKLT	FERT	0.856	SPKLT.FERT	-0.0905235	SPKLT.P2/P3	FERT	P2/P3
SPKLT	FLFLG	0.026	SPKLT.FLFLG	-0.202306	SPKLT.P2/P3	FLFLG	P2/P3
SPKLT	2LLT	0.0466	SPKLT.2LLT	-0.182859	SPKLT.P2/P3	2LLT	P2/P3
SPKLT	ANTLT	0.3041	SPKLT.ANTLT	0.214257	SPKLT.P2/P3	ANTLT	P2/P3
SPKLT	LIGLT	0.6239	SPKLT.LIGLT	0.152092	SPKLT.P2/P3	LIGLT	P2/P3
SPKLT	PANBASE	0.2487	SPKLT.PANBASE	0.195523	SPKLT.P2/P3	PANBASE	P2/P3
SPKLT	UNFILLED	0.5444	SPKLT.UNFILLED	-0.208734	SPKLT.P2/P3	UNFILLED	P2/P3
SPKLT	DTHD	0.0002	SPKLT.DTHD	0.428904	SPKLT.P2/P3	DTHD	P2/P3
SPKLT	CUDI	0.8436	SPKLT.CUDI	0.139957	SPKLT.P2/P3	CUDI	P2/P3
SPKLT	CULT	0.0015	SPKLT.CULT	0.269102	SPKLT.P2/P3	CULT	P2/P3
SPKLT	DIST	0.0182	SPKLT.DIST	0.19303	SPKLT.P2/P3	DIST	P2/P3
SPKLT	PNLG	0.0838	SPKLT.PNLG	0.253291	SPKLT.P2/P3	PNLG	P2/P3
SPKLT	FLFWD	0.2295	SPKLT.FLFWD	-0.159032	SPKLT.P2/P3	FLFWD	P2/P3
SPKLT	2LWD	0.3696	SPKLT.2LWD	0.00571969	SPKLT.P2/P3	2LWD	P2/P3
		1	SPKLT.SPKLT	0	SPKLT.P2/P3	SPKLT	P2/P3
STLWD	FERT	0.4675	STLWD.FERT	0.0164023	STLWD.P2/P3	FERT	P2/P3
STLWD	FLFLG	0.0637	STLWD.FLFLG	-0.220937	STLWD.P2/P3	FLFLG	P2/P3
STLWD	2LLT	0.0181	STLWD.2LLT	-0.232038	STLWD.P2/P3	2LLT	P2/P3
STLWD	ANTLT	0.1193	STLWD.ANTLT	0.108176	STLWD.P2/P3	ANTLT	P2/P3
STLWD	LIGLT	0.3836	STLWD.LIGLT	0.1319	STLWD.P2/P3	LIGLT	P2/P3
STLWD	PANBASE	0.0026	STLWD.PANBASE	-0.0859417	STLWD.P2/P3	PANBASE	P2/P3
STLWD	UNFILLED	0.0883	STLWD.UNFILLED	-0.311629	STLWD.P2/P3	UNFILLED	P2/P3
STLWD	DTHD	0.0203	STLWD.DTHD	0.458165	STLWD.P2/P3	DTHD	P2/P3
STLWD	CUDI	0.7834	STLWD.CUDI	0.274965	STLWD.P2/P3	CUDI	P2/P3
STLWD	CULT	0.1809	STLWD.CULT	0.288278	STLWD.P2/P3	CULT	P2/P3
STLWD	DIST	0.3964	STLWD.DIST	0.207244	STLWD.P2/P3	DIST	P2/P3
STLWD	PNLG	0.552	STLWD.PNLG	0.0146135	STLWD.P2/P3	PNLG	P2/P3
STLWD	FLFWD	0.7259	STLWD.FLFWD	-0.0380729	STLWD.P2/P3	FLFWD	P2/P3
STLWD	2LWD	0.2518	STLWD.2LWD	0.192235	STLWD.P2/P3	2LWD	P2/P3
STLWD	SPKLT	0.173	STLWD.SPKLT	0.670164	STLWD.P2/P3	SPKLT	P2/P3
		1	STLWD.STLWD	0	STLWD.P2/P3	STLWD	P2/P3
SPKWD	FERT	0.3691	SPKWD.FERT	0.0169928	SPKWD.P2/P3	FERT	P2/P3
SPKWD	FLFLG	0.0102	SPKWD.FLFLG	0.153816	SPKWD.P2/P3	FLFLG	P2/P3
SPKWD	2LLT	0.1996	SPKWD.2LLT	0.0147987	SPKWD.P2/P3	2LLT	P2/P3
SPKWD	ANTLT	0.0009	SPKWD.ANTLT	-0.15332	SPKWD.P2/P3	ANTLT	P2/P3
SPKWD	LIGLT	0.0439	SPKWD.LIGLT	-0.226948	SPKWD.P2/P3	LIGLT	P2/P3
SPKWD	PANBASE	0.2859	SPKWD.PANBASE	0.128178	SPKWD.P2/P3	PANBASE	P2/P3
SPKWD	UNFILLED	0.2364	SPKWD.UNFILLED	0.141103	SPKWD.P2/P3	UNFILLED	P2/P3
SPKWD	DTHD	0.0534	SPKWD.DTHD	-0.11943	SPKWD.P2/P3	DTHD	P2/P3
SPKWD	CUDI	0.5404	SPKWD.CUDI	0.196121	SPKWD.P2/P3	CUDI	P2/P3
SPKWD	CULT	0.0093	SPKWD.CULT	-0.131706	SPKWD.P2/P3	CULT	P2/P3
SPKWD	DIST	0.3514	SPKWD.DIST	-0.314525	SPKWD.P2/P3	DIST	P2/P3
SPKWD	PNLG	0.0997	SPKWD.PNLG	-0.150756	SPKWD.P2/P3	PNLG	P2/P3
SPKWD	FLFWD	0.0761	SPKWD.FLFWD	0.212042	SPKWD.P2/P3	FLFWD	P2/P3
SPKWD	2LWD	0.1918	SPKWD.2LWD	0.185573	SPKWD.P2/P3	2LWD	P2/P3
SPKWD	SPKLT	0.1017	SPKWD.SPKLT	0.0957254	SPKWD.P2/P3	SPKLT	P2/P3
SPKWD	STLWD	0.996	SPKWD.STLWD	0.118911	SPKWD.P2/P3	STLWD	P2/P3
		1	SPKWD.SPKWD	0	SPKWD.P2/P3	SPKWD	P2/P3
STLLT	FERT	0.1421	STLLT.FERT	-0.0295262	STLLT.P2/P3	FERT	P2/P3
STLLT	FLFLG	0.314	STLLT.FLFLG	-0.0738782	STLLT.P2/P3	FLFLG	P2/P3
STLLT	2LLT	0.464	STLLT.2LLT	-0.129676	STLLT.P2/P3	2LLT	P2/P3
STLLT	ANTLT	0.2082	STLLT.ANTLT	0.0905332	STLLT.P2/P3	ANTLT	P2/P3
STLLT	LIGLT	0.6874	STLLT.LIGLT	-0.0389906	STLLT.P2/P3	LIGLT	P2/P3
STLLT	PANBASE	0.2204	STLLT.PANBASE	0.127227	STLLT.P2/P3	PANBASE	P2/P3
STLLT	UNFILLED	0.4497	STLLT.UNFILLED	-0.0919477	STLLT.P2/P3	UNFILLED	P2/P3
STLLT	DTHD	0.1243	STLLT.DTHD	-0.0163725	STLLT.P2/P3	DTHD	P2/P3
STLLT	CUDI	0.7358	STLLT.CUDI	0.00602537	STLLT.P2/P3	CUDI	P2/P3
STLLT	CULT	0.0529	STLLT.CULT	-0.0512685	STLLT.P2/P3	CULT	P2/P3
STLLT	DIST	0.3879	STLLT.DIST	-0.109891	STLLT.P2/P3	DIST	P2/P3
STLLT	PNLG	0.0679	STLLT.PNLG	0.0579647	STLLT.P2/P3	PNLG	P2/P3
STLLT	FLFWD	0.6467	STLLT.FLFWD	0.0578402	STLLT.P2/P3	FLFWD	P2/P3
STLLT	2LWD	0.7734	STLLT.2LWD	0.0944002	STLLT.P2/P3	2LWD	P2/P3
STLLT	SPKLT	0.2722	STLLT.SPKLT	0.619214	STLLT.P2/P3	SPKLT	P2/P3
STLLT	STLWD	0.8242	STLLT.STLWD	0.338797	STLLT.P2/P3	STLWD	P2/P3
STLLT	SPKWD	0.2041	STLLT.SPKWD	0.508215	STLLT.P2/P3	SPKWD	P2/P3
		1	STLLT.STLLT	0	STLLT.P2/P3	STLLT	P2/P3
STYLT	FERT	0.1107	STYLT.FERT	0.140511	STYLT.P2/P3	FERT	P2/P3
STYLT	FLFLG	0.6905	STYLT.FLFLG	-0.0541538	STYLT.P2/P3	FLFLG	P2/P3
STYLT	2LLT	0.3647	STYLT.2LLT	-0.0685263	STYLT.P2/P3	2LLT	P2/P3
STYLT	ANTLT	0.5685	STYLT.ANTLT	-0.0443827	STYLT.P2/P3	ANTLT	P2/P3
STYLT	LIGLT	0.225	STYLT.LIGLT	0.236705	STYLT.P2/P3	LIGLT	P2/P3
STYLT	PANBASE	0.4933	STYLT.PANBASE	-0.105738	STYLT.P2/P3	PANBASE	P2/P3
STYLT	UNFILLED	0.1671	STYLT.UNFILLED	-0.3215	STYLT.P2/P3	UNFILLED	P2/P3
STYLT	DTHD	0.2495	STYLT.DTHD	0.291179	STYLT.P2/P3	DTHD	P2/P3
STYLT	CUDI	0.762	STYLT.CUDI	0.312944	STYLT.P2/P3	CUDI	P2/P3
STYLT	CULT	0.1026	STYLT.CULT	0.314266	STYLT.P2/P3	CULT	P2/P3
STYLT	DIST	0.9079	STYLT.DIST	0.13799	STYLT.P2/P3	DIST	P2/P3
STYLT	PNLG	0.3694	STYLT.PNLG	0.0909993	STYLT.P2/P3	PNLG	P2/P3
STYLT	FLFWD	0.6396	STYLT.FLFWD	0.0589958	STYLT.P2/P3	FLFWD	P2/P3
STYLT	2LWD	0.5736	STYLT.2LWD	0.215388	STYLT.P2/P3	2LWD	P2/P3
STYLT	SPKLT	0.6139	STYLT.SPKLT	0.398985	STYLT.P2/P3	SPKLT	P2/P3
STYLT	STLWD	0.014	STYLT.STLWD	0.748555	STYLT.P2/P3	STLWD	P2/P3
STYLT	SPKWD	0.3237	STYLT.SPKWD	-0.129309	STYLT.P2/P3	SPKWD	P2/P3
STYLT	STLLT	0.1002	STYLT.STLLT	0.0494946	STYLT.P2/P3	STLLT	P2/P3
		1	STYLT.STYLT	0	STYLT.P2/P3	STYLT	P2/P3
AWNLT	FERT	0.5259	AWNLT.FERT	0.215591	AWNLT.P2/P3	FERT	P2/P3
AWNLT	FLFLG	0.4974	AWNLT.FLFLG	0.0419719	AWNLT.P2/P3	FLFLG	P2/P3
AWNLT	2LLT	0.3839	AWNLT.2LLT	0.464433	AWNLT.P2/P3	2LLT	P2/P3
AWNLT	ANTLT	0.0086	AWNLT.ANTLT	-0.320179	AWNLT.P2/P3	ANTLT	P2/P3
AWNLT	LIGLT	0.7794	AWNLT.LIGLT	0.33003	AWNLT.P2/P3	LIGLT	P2/P3
AWNLT	PANBASE	0.2669	AWNLT.PANBASE	-0.218602	AWNLT.P2/P3	PANBASE	P2/P3
AWNLT	UNFILLED	0.7993	AWNLT.UNFILLED	-0.225807	AWNLT.P2/P3	UNFILLED	P2/P3
AWNLT	DTHD	0.0024	AWNLT.DTHD	-0.0699009	AWNLT.P2/P3	DTHD	P2/P3
AWNLT	CUDI	0.1574	AWNLT.CUDI	-0.0150942	AWNLT.P2/P3	CUDI	P2/P3
AWNLT	CULT	0.2955	AWNLT.CULT	0.0485532	AWNLT.P2/P3	CULT	P2/P3
AWNLT	DIST	0.0469	AWNLT.DIST	-0.0556113	AWNLT.P2/P3	DIST	P2/P3
AWNLT	PNLG	0.7552	AWNLT.PNLG	0.0834983	AWNLT.P2/P3	PNLG	P2/P3
AWNLT	FLFWD	0.3497	AWNLT.FLFWD	-0.0268766	AWNLT.P2/P3	FLFWD	P2/P3
AWNLT	2LWD	0.5667	AWNLT.2LWD	0.109789	AWNLT.P2/P3	2LWD	P2/P3
AWNLT	SPKLT	0.2685	AWNLT.SPKLT	-0.0985466	AWNLT.P2/P3	SPKLT	P2/P3
AWNLT	STLWD	0.2303	AWNLT.STLWD	-0.0338577	AWNLT.P2/P3	STLWD	P2/P3
AWNLT	SPKWD	0.1949	AWNLT.SPKWD	-0.331773	AWNLT.P2/P3	SPKWD	P2/P3
AWNLT	STLLT	0.6	AWNLT.STLLT	-0.0493657	AWNLT.P2/P3	STLLT	P2/P3
AWNLT	STYLT	0.589	AWNLT.STYLT	0.038316	AWNLT.P2/P3	STYLT	P2/P3
		1	AWNLT.AWNLT	0	AWNLT.P2/P3	AWNLT	P2/P3
AWNWD	FERT	0.8777	AWNWD.FERT	0.133467	AWNWD.P2/P3	FERT	P2/P3
AWNWD	FLFLG	0.5696	AWNWD.FLFLG	0.111131	AWNWD.P2/P3	FLFLG	P2/P3
AWNWD	2LLT	0.3448	AWNWD.2LLT	0.353625	AWNWD.P2/P3	2LLT	P2/P3
AWNWD	ANTLT	0.9044	AWNWD.ANTLT	-0.233831	AWNWD.P2/P3	ANTLT	P2/P3
AWNWD	LIGLT	0.4042	AWNWD.LIGLT	0.284896	AWNWD.P2/P3	LIGLT	P2/P3
AWNWD	PANBASE	0.082	AWNWD.PANBASE	-0.271782	AWNWD.P2/P3	PANBASE	P2/P3
AWNWD	UNFILLED	0.8823	AWNWD.UNFILLED	-0.0729083	AWNWD.P2/P3	UNFILLED	P2/P3
AWNWD	DTHD	0.4497	AWNWD.DTHD	-0.15999	AWNWD.P2/P3	DTHD	P2/P3
AWNWD	CUDI	0.7404	AWNWD.CUDI	0.0131972	AWNWD.P2/P3	CUDI	P2/P3
AWNWD	CULT	0.5694	AWNWD.CULT	-0.04678	AWNWD.P2/P3	CULT	P2/P3
AWNWD	DIST	0.3275	AWNWD.DIST	0.0718272	AWNWD.P2/P3	DIST	P2/P3
AWNWD	PNLG	0.2496	AWNWD.PNLG	0.105713	AWNWD.P2/P3	PNLG	P2/P3
AWNWD	FLFWD	0.0839	AWNWD.FLFWD	-0.0300654	AWNWD.P2/P3	FLFWD	P2/P3
AWNWD	2LWD	0.2241	AWNWD.2LWD	0.0171298	AWNWD.P2/P3	2LWD	P2/P3
AWNWD	SPKLT	0.0223	AWNWD.SPKLT	-0.308259	AWNWD.P2/P3	SPKLT	P2/P3
AWNWD	STLWD	0.1132	AWNWD.STLWD	-0.281067	AWNWD.P2/P3	STLWD	P2/P3
AWNWD	SPKWD	0.0162	AWNWD.SPKWD	-0.265863	AWNWD.P2/P3	SPKWD	P2/P3
AWNWD	STLLT	0.0377	AWNWD.STLLT	-0.112282	AWNWD.P2/P3	STLLT	P2/P3
AWNWD	STYLT	0.6008	AWNWD.STYLT	-0.139297	AWNWD.P2/P3	STYLT	P2/P3
AWNWD	AWNLT	0.0028	AWNWD.AWNLT	0.796907	AWNWD.P2/P3	AWNLT	P2/P3
		1	AWNWD.AWNWD	0	AWNWD.P2/P3	AWNWD	P2/P3
STGLT	FERT	0.0077	STGLT.FERT	-0.284878	STGLT.P2/P3	FERT	P2/P3
STGLT	FLFLG	0.8839	STGLT.FLFLG	-0.0388251	STGLT.P2/P3	FLFLG	P2/P3
STGLT	2LLT	0.8149	STGLT.2LLT	-0.0175357	STGLT.P2/P3	2LLT	P2/P3
STGLT	ANTLT	0.2576	STGLT.ANTLT	0.231338	STGLT.P2/P3	ANTLT	P2/P3
STGLT	LIGLT	0.9443	STGLT.LIGLT	0.0648663	STGLT.P2/P3	LIGLT	P2/P3
STGLT	PANBASE	0.6713	STGLT.PANBASE	0.0708942	STGLT.P2/P3	PANBASE	P2/P3
STGLT	UNFILLED	0.2048	STGLT.UNFILLED	0.111862	STGLT.P2/P3	UNFILLED	P2/P3
STGLT	DTHD	0.7075	STGLT.DTHD	-0.0398208	STGLT.P2/P3	DTHD	P2/P3
STGLT	CUDI	0.3585	STGLT.CUDI	-0.168018	STGLT.P2/P3	CUDI	P2/P3
STGLT	CULT	0.1802	STGLT.CULT	0.124057	STGLT.P2/P3	CULT	P2/P3
STGLT	DIST	0.119	STGLT.DIST	0.334823	STGLT.P2/P3	DIST	P2/P3
STGLT	PNLG	0.312	STGLT.PNLG	0.0556669	STGLT.P2/P3	PNLG	P2/P3
STGLT	FLFWD	0.1903	STGLT.FLFWD	-0.266454	STGLT.P2/P3	FLFWD	P2/P3
STGLT	2LWD	0.1984	STGLT.2LWD	-0.111302	STGLT.P2/P3	2LWD	P2/P3
STGLT	SPKLT	0.9734	STGLT.SPKLT	0.0484693	STGLT.P2/P3	SPKLT	P2/P3
STGLT	STLWD	0.1091	STGLT.STLWD	0.0990888	STGLT.P2/P3	STLWD	P2/P3
STGLT	SPKWD	0.0212	STGLT.SPKWD	-0.312601	STGLT.P2/P3	SPKWD	P2/P3
STGLT	STLLT	0.4926	STGLT.STLLT	-0.0648245	STGLT.P2/P3	STLLT	P2/P3
STGLT	STYLT	0.2903	STGLT.STYLT	0.275642	STGLT.P2/P3	STYLT	P2/P3
STGLT	AWNLT	0.6121	STGLT.AWNLT	0.0870283	STGLT.P2/P3	AWNLT	P2/P3
STGLT	AWNWD	0.882	STGLT.AWNWD	0.0354748	STGLT.P2/P3	AWNWD	P2/P3
		1	STGLT.STGLT	0	STGLT.P2/P3	STGLT	P2/P3
PAN2BR	FERT	0.4993	PAN2BR.FERT	-0.0614946	PAN2BR.P2/P3	FERT	P2/P3
PAN2BR	FLFLG	0.1917	PAN2BR.FLFLG	-0.108501	PAN2BR.P2/P3	FLFLG	P2/P3
PAN2BR	2LLT	0.135	PAN2BR.2LLT	-0.111114	PAN2BR.P2/P3	2LLT	P2/P3
PAN2BR	ANTLT	0.6818	PAN2BR.ANTLT	-0.0749704	PAN2BR.P2/P3	ANTLT	P2/P3
PAN2BR	LIGLT	0.7737	PAN2BR.LIGLT	0.098116	PAN2BR.P2/P3	LIGLT	P2/P3
PAN2BR	PANBASE	0.7322	PAN2BR.PANBASE	-0.050972	PAN2BR.P2/P3	PANBASE	P2/P3
PAN2BR	UNFILLED	0.657	PAN2BR.UNFILLED	-0.0566	PAN2BR.P2/P3	UNFILLED	P2/P3
PAN2BR	DTHD	0.7844	PAN2BR.DTHD	0.136063	PAN2BR.P2/P3	DTHD	P2/P3
PAN2BR	CUDI	0.2232	PAN2BR.CUDI	-0.0353917	PAN2BR.P2/P3	CUDI	P2/P3
PAN2BR	CULT	0.4338	PAN2BR.CULT	-0.043325	PAN2BR.P2/P3	CULT	P2/P3
PAN2BR	DIST	0.6105	PAN2BR.DIST	-0.09449	PAN2BR.P2/P3	DIST	P2/P3
PAN2BR	PNLG	0.0276	PAN2BR.PNLG	-0.260356	PAN2BR.P2/P3	PNLG	P2/P3
PAN2BR	FLFWD	0.4152	PAN2BR.FLFWD	0.0757063	PAN2BR.P2/P3	FLFWD	P2/P3
PAN2BR	2LWD	0.7186	PAN2BR.2LWD	0.0292345	PAN2BR.P2/P3	2LWD	P2/P3
PAN2BR	SPKLT	0.6717	PAN2BR.SPKLT	-0.0497782	PAN2BR.P2/P3	SPKLT	P2/P3
PAN2BR	STLWD	0.8566	PAN2BR.STLWD	0.0432449	PAN2BR.P2/P3	STLWD	P2/P3
PAN2BR	SPKWD	0.2228	PAN2BR.SPKWD	-0.180447	PAN2BR.P2/P3	SPKWD	P2/P3
PAN2BR	STLLT	0.3637	PAN2BR.STLLT	-0.0897508	PAN2BR.P2/P3	STLLT	P2/P3
PAN2BR	STYLT	0.6694	PAN2BR.STYLT	0.0957885	PAN2BR.P2/P3	STYLT	P2/P3
PAN2BR	AWNLT	0.7728	PAN2BR.AWNLT	0.0477614	PAN2BR.P2/P3	AWNLT	P2/P3
PAN2BR	AWNWD	0.252	PAN2BR.AWNWD	0.0180513	PAN2BR.P2/P3	AWNWD	P2/P3
PAN2BR	STGLT	0.096	PAN2BR.STGLT	0.223224	PAN2BR.P2/P3	STGLT	P2/P3
		1	PAN2BR.PAN2BR	0	PAN2BR.P2/P3	PAN2BR	P2/P3
LEAF	FERT	0.5327	LEAF.FERT	0.227406	LEAF.P2/P3	FERT	P2/P3
LEAF	FLFLG	0.6923	LEAF.FLFLG	0.148354	LEAF.P2/P3	FLFLG	P2/P3
LEAF	2LLT	0.7385	LEAF.2LLT	0.196199	LEAF.P2/P3	2LLT	P2/P3
LEAF	ANTLT	0.7681	LEAF.ANTLT	0.0249559	LEAF.P2/P3	ANTLT	P2/P3
LEAF	LIGLT	0.3269	LEAF.LIGLT	-0.114512	LEAF.P2/P3	LIGLT	P2/P3
LEAF	PANBASE	0.1485	LEAF.PANBASE	-0.202674	LEAF.P2/P3	PANBASE	P2/P3
LEAF	UNFILLED	0.9304	LEAF.UNFILLED	-0.087213	LEAF.P2/P3	UNFILLED	P2/P3
LEAF	DTHD	0.1733	LEAF.DTHD	-0.209593	LEAF.P2/P3	DTHD	P2/P3
LEAF	CUDI	0.3065	LEAF.CUDI	-0.12085	LEAF.P2/P3	CUDI	P2/P3
LEAF	CULT	0.4778	LEAF.CULT	-0.0313187	LEAF.P2/P3	CULT	P2/P3
LEAF	DIST	0.7049	LEAF.DIST	-0.0636222	LEAF.P2/P3	DIST	P2/P3
LEAF	PNLG	0.3993	LEAF.PNLG	0.143572	LEAF.P2/P3	PNLG	P2/P3
LEAF	FLFWD	0.5016	LEAF.FLFWD	-0.100708	LEAF.P2/P3	FLFWD	P2/P3
LEAF	2LWD	0.3918	LEAF.2LWD	-0.139543	LEAF.P2/P3	2LWD	P2/P3
LEAF	SPKLT	0.3931	LEAF.SPKLT	-0.0809493	LEAF.P2/P3	SPKLT	P2/P3
LEAF	STLWD	0.2744	LEAF.STLWD	-0.223105	LEAF.P2/P3	STLWD	P2/P3
LEAF	SPKWD	0.0283	LEAF.SPKWD	-0.230157	LEAF.P2/P3	SPKWD	P2/P3
LEAF	STLLT	0.2343	LEAF.STLLT	-0.076676	LEAF.P2/P3	STLLT	P2/P3
LEAF	STYLT	0.0293	LEAF.STYLT	-0.306737	LEAF.P2/P3	STYLT	P2/P3
LEAF	AWNLT	0.7699	LEAF.AWNLT	0.218666	LEAF.P2/P3	AWNLT	P2/P3
LEAF	AWNWD	0.2033	LEAF.AWNWD	0.0737379	LEAF.P2/P3	AWNWD	P2/P3
LEAF	STGLT	0.1947	LEAF.STGLT	0.0669409	LEAF.P2/P3	STGLT	P2/P3
LEAF	PAN2BR	0.4788	LEAF.PAN2BR	-0.109304	LEAF.P2/P3	PAN2BR	P2/P3
		1	LEAF.LEAF	0	LEAF.P2/P3	LEAF	P2/P3
PANEXS	FERT	0.0773	PANEXS.FERT	0.017637	PANEXS.P2/P3	FERT	P2/P3
PANEXS	FLFLG	0.2142	PANEXS.FLFLG	-0.282781	PANEXS.P2/P3	FLFLG	P2/P3
PANEXS	2LLT	0.1397	PANEXS.2LLT	-0.309588	PANEXS.P2/P3	2LLT	P2/P3
PANEXS	ANTLT	0.4515	PANEXS.ANTLT	0.269619	PANEXS.P2/P3	ANTLT	P2/P3
PANEXS	LIGLT	0.3156	PANEXS.LIGLT	-0.125123	PANEXS.P2/P3	LIGLT	P2/P3
PANEXS	PANBASE	0.6083	PANEXS.PANBASE	-0.0287585	PANEXS.P2/P3	PANBASE	P2/P3
PANEXS	UNFILLED	0.2404	PANEXS.UNFILLED	-0.0378978	PANEXS.P2/P3	UNFILLED	P2/P3
PANEXS	DTHD	0.1711	PANEXS.DTHD	-0.164681	PANEXS.P2/P3	DTHD	P2/P3
PANEXS	CUDI	0.5716	PANEXS.CUDI	-0.146988	PANEXS.P2/P3	CUDI	P2/P3
PANEXS	CULT	0.099	PANEXS.CULT	-0.260594	PANEXS.P2/P3	CULT	P2/P3
PANEXS	DIST	0.6148	PANEXS.DIST	0.107754	PANEXS.P2/P3	DIST	P2/P3
PANEXS	PNLG	0.7885	PANEXS.PNLG	-0.0574522	PANEXS.P2/P3	PNLG	P2/P3
PANEXS	FLFWD	0.3374	PANEXS.FLFWD	-0.147213	PANEXS.P2/P3	FLFWD	P2/P3
PANEXS	2LWD	0.4023	PANEXS.2LWD	-0.0885739	PANEXS.P2/P3	2LWD	P2/P3
PANEXS	SPKLT	0.8598	PANEXS.SPKLT	0.0841854	PANEXS.P2/P3	SPKLT	P2/P3
PANEXS	STLWD	0.9365	PANEXS.STLWD	-0.0555405	PANEXS.P2/P3	STLWD	P2/P3
PANEXS	SPKWD	0.2055	PANEXS.SPKWD	-0.296887	PANEXS.P2/P3	SPKWD	P2/P3
PANEXS	STLLT	0.1311	PANEXS.STLLT	0.0582169	PANEXS.P2/P3	STLLT	P2/P3
PANEXS	STYLT	0.9442	PANEXS.STYLT	-0.0803765	PANEXS.P2/P3	STYLT	P2/P3
PANEXS	AWNLT	0.8791	PANEXS.AWNLT	0.000357534	PANEXS.P2/P3	AWNLT	P2/P3
PANEXS	AWNWD	0.9228	PANEXS.AWNWD	-0.061526	PANEXS.P2/P3	AWNWD	P2/P3
PANEXS	STGLT	0.8244	PANEXS.STGLT	0.0417805	PANEXS.P2/P3	STGLT	P2/P3
PANEXS	PAN2BR	0.4968	PANEXS.PAN2BR	-0.131662	PANEXS.P2/P3	PAN2BR	P2/P3
PANEXS	LEAF	0.7455	PANEXS.LEAF	0.169814	PANEXS.P2/P3	LEAF	P2/P3
		1	PANEXS.PANEXS	0	PANEXS.P2/P3	PANEXS	P2/P3
CUHABIT	FERT	0.0863	CUHABIT.FERT	0.180645	CUHABIT.P2/P3	FERT	P2/P3
CUHABIT	FLFLG	0.3399	CUHABIT.FLFLG	-0.106271	CUHABIT.P2/P3	FLFLG	P2/P3
CUHABIT	2LLT	0.1435	CUHABIT.2LLT	0.0869489	CUHABIT.P2/P3	2LLT	P2/P3
CUHABIT	ANTLT	0.163	CUHABIT.ANTLT	-0.112503	CUHABIT.P2/P3	ANTLT	P2/P3
CUHABIT	LIGLT	0.5391	CUHABIT.LIGLT	0.0197697	CUHABIT.P2/P3	LIGLT	P2/P3
CUHABIT	PANBASE	0.4187	CUHABIT.PANBASE	0.117356	CUHABIT.P2/P3	PANBASE	P2/P3
CUHABIT	UNFILLED	0.1053	CUHABIT.UNFILLED	-0.23311	CUHABIT.P2/P3	UNFILLED	P2/P3
CUHABIT	DTHD	0.2836	CUHABIT.DTHD	0.0823236	CUHABIT.P2/P3	DTHD	P2/P3
CUHABIT	CUDI	0.7768	CUHABIT.CUDI	0.116923	CUHABIT.P2/P3	CUDI	P2/P3
CUHABIT	CULT	0.2116	CUHABIT.CULT	0.223726	CUHABIT.P2/P3	CULT	P2/P3
CUHABIT	DIST	0.0368	CUHABIT.DIST	-0.0205261	CUHABIT.P2/P3	DIST	P2/P3
CUHABIT	PNLG	0.1409	CUHABIT.PNLG	0.273969	CUHABIT.P2/P3	PNLG	P2/P3
CUHABIT	FLFWD	0.8512	CUHABIT.FLFWD	-0.0781119	CUHABIT.P2/P3	FLFWD	P2/P3
CUHABIT	2LWD	0.8142	CUHABIT.2LWD	-0.0410838	CUHABIT.P2/P3	2LWD	P2/P3
CUHABIT	SPKLT	0.1733	CUHABIT.SPKLT	0.00163675	CUHABIT.P2/P3	SPKLT	P2/P3
CUHABIT	STLWD	0.839	CUHABIT.STLWD	-0.0444391	CUHABIT.P2/P3	STLWD	P2/P3
CUHABIT	SPKWD	0.0349	CUHABIT.SPKWD	-0.316643	CUHABIT.P2/P3	SPKWD	P2/P3
CUHABIT	STLLT	0.035	CUHABIT.STLLT	-0.124572	CUHABIT.P2/P3	STLLT	P2/P3
CUHABIT	STYLT	0.7393	CUHABIT.STYLT	0.0340486	CUHABIT.P2/P3	STYLT	P2/P3
CUHABIT	AWNLT	0.3527	CUHABIT.AWNLT	0.0286439	CUHABIT.P2/P3	AWNLT	P2/P3
CUHABIT	AWNWD	0.2965	CUHABIT.AWNWD	-0.139372	CUHABIT.P2/P3	AWNWD	P2/P3
CUHABIT	STGLT	0.4201	CUHABIT.STGLT	0.0544484	CUHABIT.P2/P3	STGLT	P2/P3
CUHABIT	PAN2BR	0.6139	CUHABIT.PAN2BR	-0.401808	CUHABIT.P2/P3	PAN2BR	P2/P3
CUHABIT	LEAF	0.1917	CUHABIT.LEAF	0.257495	CUHABIT.P2/P3	LEAF	P2/P3
CUHABIT	PANEXS	0.2039	CUHABIT.PANEXS	0.174159	CUHABIT.P2/P3	PANEXS	P2/P3
		1	CUHABIT.CUHABIT	0	CUHABIT.P2/P3	CUHABIT	P2/P3
CUHABIT_VEG	FERT	0.6464	CUHABIT_VEG.FERT	-0.0842806	CUHABIT_VEG.P2/P3	FERT	P2/P3
CUHABIT_VEG	FLFLG	0.3139	CUHABIT_VEG.FLFLG	-0.240179	CUHABIT_VEG.P2/P3	FLFLG	P2/P3
CUHABIT_VEG	2LLT	0.2731	CUHABIT_VEG.2LLT	-0.0027246	CUHABIT_VEG.P2/P3	2LLT	P2/P3
CUHABIT_VEG	ANTLT	0.0583	CUHABIT_VEG.ANTLT	-0.0154091	CUHABIT_VEG.P2/P3	ANTLT	P2/P3
CUHABIT_VEG	LIGLT	0.7566	CUHABIT_VEG.LIGLT	-0.0154349	CUHABIT_VEG.P2/P3	LIGLT	P2/P3
CUHABIT_VEG	PANBASE	0.5743	CUHABIT_VEG.PANBASE	0.0213041	CUHABIT_VEG.P2/P3	PANBASE	P2/P3
CUHABIT_VEG	UNFILLED	0.3799	CUHABIT_VEG.UNFILLED	-0.011829	CUHABIT_VEG.P2/P3	UNFILLED	P2/P3
CUHABIT_VEG	DTHD	0.6036	CUHABIT_VEG.DTHD	0.0433913	CUHABIT_VEG.P2/P3	DTHD	P2/P3
CUHABIT_VEG	CUDI	0.2039	CUHABIT_VEG.CUDI	-0.0723811	CUHABIT_VEG.P2/P3	CUDI	P2/P3
CUHABIT_VEG	CULT	0.3491	CUHABIT_VEG.CULT	0.107326	CUHABIT_VEG.P2/P3	CULT	P2/P3
CUHABIT_VEG	DIST	0.2129	CUHABIT_VEG.DIST	0.106359	CUHABIT_VEG.P2/P3	DIST	P2/P3
CUHABIT_VEG	PNLG	0.1639	CUHABIT_VEG.PNLG	0.0830674	CUHABIT_VEG.P2/P3	PNLG	P2/P3
CUHABIT_VEG	FLFWD	0.254	CUHABIT_VEG.FLFWD	-0.00171721	CUHABIT_VEG.P2/P3	FLFWD	P2/P3
CUHABIT_VEG	2LWD	0.7596	CUHABIT_VEG.2LWD	0.0866521	CUHABIT_VEG.P2/P3	2LWD	P2/P3
CUHABIT_VEG	SPKLT	0.8201	CUHABIT_VEG.SPKLT	-0.0990863	CUHABIT_VEG.P2/P3	SPKLT	P2/P3
CUHABIT_VEG	STLWD	0.1013	CUHABIT_VEG.STLWD	-0.0948797	CUHABIT_VEG.P2/P3	STLWD	P2/P3
CUHABIT_VEG	SPKWD	0.3284	CUHABIT_VEG.SPKWD	-0.212075	CUHABIT_VEG.P2/P3	SPKWD	P2/P3
CUHABIT_VEG	STLLT	0.6071	CUHABIT_VEG.STLLT	0.0192621	CUHABIT_VEG.P2/P3	STLLT	P2/P3
CUHABIT_VEG	STYLT	0.581	CUHABIT_VEG.STYLT	-0.255846	CUHABIT_VEG.P2/P3	STYLT	P2/P3
CUHABIT_VEG	AWNLT	0.0165	CUHABIT_VEG.AWNLT	0.134611	CUHABIT_VEG.P2/P3	AWNLT	P2/P3
CUHABIT_VEG	AWNWD	0.9755	CUHABIT_VEG.AWNWD	0.0183731	CUHABIT_VEG.P2/P3	AWNWD	P2/P3
CUHABIT_VEG	STGLT	0.4089	CUHABIT_VEG.STGLT	0.0610212	CUHABIT_VEG.P2/P3	STGLT	P2/P3
CUHABIT_VEG	PAN2BR	0.5006	CUHABIT_VEG.PAN2BR	-0.130657	CUHABIT_VEG.P2/P3	PAN2BR	P2/P3
CUHABIT_VEG	LEAF	0.5117	CUHABIT_VEG.LEAF	0.211816	CUHABIT_VEG.P2/P3	LEAF	P2/P3
CUHABIT_VEG	PANEXS	0.8076	CUHABIT_VEG.PANEXS	0.0694341	CUHABIT_VEG.P2/P3	PANEXS	P2/P3
CUHABIT_VEG	CUHABIT	0.0974	CUHABIT_VEG.CUHABIT	0.59794	CUHABIT_VEG.P2/P3	CUHABIT	P2/P3
		1	CUHABIT_VEG.CUHABIT_VEG	0	CUHABIT_VEG.P2/P3	CUHABIT_VEG	P2/P3
FLAGATT	FERT	0.6863	FLAGATT.FERT	-0.0459475	FLAGATT.P2/P3	FERT	P2/P3
FLAGATT	FLFLG	0.6968	FLAGATT.FLFLG	-0.0110481	FLAGATT.P2/P3	FLFLG	P2/P3
FLAGATT	2LLT	0.1129	FLAGATT.2LLT	-0.02508	FLAGATT.P2/P3	2LLT	P2/P3
FLAGATT	ANTLT	0.9618	FLAGATT.ANTLT	0.0589977	FLAGATT.P2/P3	ANTLT	P2/P3
FLAGATT	LIGLT	0.3224	FLAGATT.LIGLT	-0.00609547	FLAGATT.P2/P3	LIGLT	P2/P3
FLAGATT	PANBASE	0.5477	FLAGATT.PANBASE	-0.110361	FLAGATT.P2/P3	PANBASE	P2/P3
FLAGATT	UNFILLED	0.3038	FLAGATT.UNFILLED	0.174907	FLAGATT.P2/P3	UNFILLED	P2/P3
FLAGATT	DTHD	0.8193	FLAGATT.DTHD	0.11006	FLAGATT.P2/P3	DTHD	P2/P3
FLAGATT	CUDI	0.4901	FLAGATT.CUDI	0.188897	FLAGATT.P2/P3	CUDI	P2/P3
FLAGATT	CULT	0.2179	FLAGATT.CULT	0.242435	FLAGATT.P2/P3	CULT	P2/P3
FLAGATT	DIST	0.1633	FLAGATT.DIST	-0.00193682	FLAGATT.P2/P3	DIST	P2/P3
FLAGATT	PNLG	0.383	FLAGATT.PNLG	0.102812	FLAGATT.P2/P3	PNLG	P2/P3
FLAGATT	FLFWD	0.4	FLAGATT.FLFWD	0.211085	FLAGATT.P2/P3	FLFWD	P2/P3
FLAGATT	2LWD	0.5743	FLAGATT.2LWD	0.210479	FLAGATT.P2/P3	2LWD	P2/P3
FLAGATT	SPKLT	0.5676	FLAGATT.SPKLT	-0.120312	FLAGATT.P2/P3	SPKLT	P2/P3
FLAGATT	STLWD	0.4915	FLAGATT.STLWD	-0.0637438	FLAGATT.P2/P3	STLWD	P2/P3
FLAGATT	SPKWD	0.2887	FLAGATT.SPKWD	-0.0634608	FLAGATT.P2/P3	SPKWD	P2/P3
FLAGATT	STLLT	0.8064	FLAGATT.STLLT	-0.0596748	FLAGATT.P2/P3	STLLT	P2/P3
FLAGATT	STYLT	0.9388	FLAGATT.STYLT	0.0348381	FLAGATT.P2/P3	STYLT	P2/P3
FLAGATT	AWNLT	0.3296	FLAGATT.AWNLT	-0.194672	FLAGATT.P2/P3	AWNLT	P2/P3
FLAGATT	AWNWD	0.8698	FLAGATT.AWNWD	-0.102259	FLAGATT.P2/P3	AWNWD	P2/P3
FLAGATT	STGLT	0.8964	FLAGATT.STGLT	0.00275338	FLAGATT.P2/P3	STGLT	P2/P3
FLAGATT	PAN2BR	0.9753	FLAGATT.PAN2BR	-0.177838	FLAGATT.P2/P3	PAN2BR	P2/P3
FLAGATT	LEAF	0.8341	FLAGATT.LEAF	0.079482	FLAGATT.P2/P3	LEAF	P2/P3
FLAGATT	PANEXS	0.5439	FLAGATT.PANEXS	0.034623	FLAGATT.P2/P3	PANEXS	P2/P3
FLAGATT	CUHABIT	0.633	FLAGATT.CUHABIT	0.304555	FLAGATT.P2/P3	CUHABIT	P2/P3
FLAGATT	CUHABIT_VEG	0.2514	FLAGATT.CUHABIT_VEG	0.22385	FLAGATT.P2/P3	CUHABIT_VEG	P2/P3
		1	FLAGATT.FLAGATT	0	FLAGATT.P2/P3	FLAGATT	P2/P3
PANTYPE	FERT	0.9915	PANTYPE.FERT	-0.0875475	PANTYPE.P2/P3	FERT	P2/P3
PANTYPE	FLFLG	0.1432	PANTYPE.FLFLG	-0.234433	PANTYPE.P2/P3	FLFLG	P2/P3
PANTYPE	2LLT	0.2156	PANTYPE.2LLT	0.150789	PANTYPE.P2/P3	2LLT	P2/P3
PANTYPE	ANTLT	0.8049	PANTYPE.ANTLT	-0.0981297	PANTYPE.P2/P3	ANTLT	P2/P3
PANTYPE	LIGLT	0.3334	PANTYPE.LIGLT	0.128817	PANTYPE.P2/P3	LIGLT	P2/P3
PANTYPE	PANBASE	0.6782	PANTYPE.PANBASE	0.142993	PANTYPE.P2/P3	PANBASE	P2/P3
PANTYPE	UNFILLED	0.9993	PANTYPE.UNFILLED	0.0831423	PANTYPE.P2/P3	UNFILLED	P2/P3
PANTYPE	DTHD	0.3091	PANTYPE.DTHD	0.0483041	PANTYPE.P2/P3	DTHD	P2/P3
PANTYPE	CUDI	0.5628	PANTYPE.CUDI	0.0708294	PANTYPE.P2/P3	CUDI	P2/P3
PANTYPE	CULT	0.1658	PANTYPE.CULT	0.180798	PANTYPE.P2/P3	CULT	P2/P3
PANTYPE	DIST	0.9614	PANTYPE.DIST	0.099558	PANTYPE.P2/P3	DIST	P2/P3
PANTYPE	PNLG	0.7564	PANTYPE.PNLG	0.115931	PANTYPE.P2/P3	PNLG	P2/P3
PANTYPE	FLFWD	0.5875	PANTYPE.FLFWD	0.144358	PANTYPE.P2/P3	FLFWD	P2/P3
PANTYPE	2LWD	0.1469	PANTYPE.2LWD	0.172473	PANTYPE.P2/P3	2LWD	P2/P3
PANTYPE	SPKLT	0.7432	PANTYPE.SPKLT	0.0116708	PANTYPE.P2/P3	SPKLT	P2/P3
PANTYPE	STLWD	0.6581	PANTYPE.STLWD	-0.0654514	PANTYPE.P2/P3	STLWD	P2/P3
PANTYPE	SPKWD	0.3843	PANTYPE.SPKWD	-0.151404	PANTYPE.P2/P3	SPKWD	P2/P3
PANTYPE	STLLT	0.7573	PANTYPE.STLLT	0.0177471	PANTYPE.P2/P3	STLLT	P2/P3
PANTYPE	STYLT	0.883	PANTYPE.STYLT	0.074853	PANTYPE.P2/P3	STYLT	P2/P3
PANTYPE	AWNLT	0.6586	PANTYPE.AWNLT	0.0471642	PANTYPE.P2/P3	AWNLT	P2/P3
PANTYPE	AWNWD	0.713	PANTYPE.AWNWD	-0.0521787	PANTYPE.P2/P3	AWNWD	P2/P3
PANTYPE	STGLT	0.3978	PANTYPE.STGLT	0.0876108	PANTYPE.P2/P3	STGLT	P2/P3
PANTYPE	PAN2BR	0.069	PANTYPE.PAN2BR	-0.0177146	PANTYPE.P2/P3	PAN2BR	P2/P3
PANTYPE	LEAF	0.4487	PANTYPE.LEAF	-0.0432626	PANTYPE.P2/P3	LEAF	P2/P3
PANTYPE	PANEXS	0.8584	PANTYPE.PANEXS	0.0904847	PANTYPE.P2/P3	PANEXS	P2/P3
PANTYPE	CUHABIT	0.0511	PANTYPE.CUHABIT	0.402329	PANTYPE.P2/P3	CUHABIT	P2/P3
PANTYPE	CUHABIT_VEG	0.0995	PANTYPE.CUHABIT_VEG	0.343758	PANTYPE.P2/P3	CUHABIT_VEG	P2/P3
PANTYPE	FLAGATT	0.5448	PANTYPE.FLAGATT	0.482047	PANTYPE.P2/P3	FLAGATT	P2/P3
		1	PANTYPE.PANTYPE	0	PANTYPE.P2/P3	PANTYPE	P2/P3
PAMB	FERT	0.0194	PAMB.FERT	-0.390339	PAMB.P2/P3	FERT	P2/P3
PAMB	FLFLG	0.4918	PAMB.FLFLG	-0.182484	PAMB.P2/P3	FLFLG	P2/P3
PAMB	2LLT	0.808	PAMB.2LLT	-0.0863687	PAMB.P2/P3	2LLT	P2/P3
PAMB	ANTLT	0.0902	PAMB.ANTLT	0.125807	PAMB.P2/P3	ANTLT	P2/P3
PAMB	LIGLT	0.0899	PAMB.LIGLT	0.350546	PAMB.P2/P3	LIGLT	P2/P3
PAMB	PANBASE	0.7526	PAMB.PANBASE	0.0682143	PAMB.P2/P3	PANBASE	P2/P3
PAMB	UNFILLED	0.1052	PAMB.UNFILLED	0.28547	PAMB.P2/P3	UNFILLED	P2/P3
PAMB	DTHD	0.1208	PAMB.DTHD	0.233758	PAMB.P2/P3	DTHD	P2/P3
PAMB	CUDI	0.2719	PAMB.CUDI	0.186562	PAMB.P2/P3	CUDI	P2/P3
PAMB	CULT	0.465	PAMB.CULT	0.189686	PAMB.P2/P3	CULT	P2/P3
PAMB	DIST	0.4596	PAMB.DIST	0.127089	PAMB.P2/P3	DIST	P2/P3
PAMB	PNLG	0.8985	PAMB.PNLG	-0.152712	PAMB.P2/P3	PNLG	P2/P3
PAMB	FLFWD	0.8503	PAMB.FLFWD	0.00827918	PAMB.P2/P3	FLFWD	P2/P3
PAMB	2LWD	0.9288	PAMB.2LWD	0.0725747	PAMB.P2/P3	2LWD	P2/P3
PAMB	SPKLT	0.2824	PAMB.SPKLT	0.0817496	PAMB.P2/P3	SPKLT	P2/P3
PAMB	STLWD	0.7955	PAMB.STLWD	0.0646029	PAMB.P2/P3	STLWD	P2/P3
PAMB	SPKWD	0.911	PAMB.SPKWD	0.149456	PAMB.P2/P3	SPKWD	P2/P3
PAMB	STLLT	0.8271	PAMB.STLLT	0.0826988	PAMB.P2/P3	STLLT	P2/P3
PAMB	STYLT	0.6602	PAMB.STYLT	0.0290351	PAMB.P2/P3	STYLT	P2/P3
PAMB	AWNLT	0.5005	PAMB.AWNLT	-0.0878831	PAMB.P2/P3	AWNLT	P2/P3
PAMB	AWNWD	0.7971	PAMB.AWNWD	-0.0639668	PAMB.P2/P3	AWNWD	P2/P3
PAMB	STGLT	0.1965	PAMB.STGLT	-0.0837975	PAMB.P2/P3	STGLT	P2/P3
PAMB	PAN2BR	0.5622	PAMB.PAN2BR	0.215987	PAMB.P2/P3	PAN2BR	P2/P3
PAMB	LEAF	0.0339	PAMB.LEAF	-0.452498	PAMB.P2/P3	LEAF	P2/P3
PAMB	PANEXS	0.5212	PAMB.PANEXS	0.110168	PAMB.P2/P3	PANEXS	P2/P3
PAMB	CUHABIT	0.4568	PAMB.CUHABIT	-0.109808	PAMB.P2/P3	CUHABIT	P2/P3
PAMB	CUHABIT_VEG	0.9042	PAMB.CUHABIT_VEG	-0.019442	PAMB.P2/P3	CUHABIT_VEG	P2/P3
PAMB	FLAGATT	0.3236	PAMB.FLAGATT	0.174446	PAMB.P2/P3	FLAGATT	P2/P3
PAMB	PANTYPE	0.768	PAMB.PANTYPE	0.231122	PAMB.P2/P3	PANTYPE	P2/P3
		1	PAMB.PAMB	0	PAMB.P2/P3	PAMB	P2/P3
CUNO	FERT	0.9603	CUNO.FERT	-0.0378321	CUNO.P2/P3	FERT	P2/P3
CUNO	FLFLG	0.9117	CUNO.FLFLG	-0.0775298	CUNO.P2/P3	FLFLG	P2/P3
CUNO	2LLT	0.2664	CUNO.2LLT	0.0483614	CUNO.P2/P3	2LLT	P2/P3
CUNO	ANTLT	0.0938	CUNO.ANTLT	0.0213791	CUNO.P2/P3	ANTLT	P2/P3
CUNO	LIGLT	0.024	CUNO.LIGLT	0.145354	CUNO.P2/P3	LIGLT	P2/P3
CUNO	PANBASE	0.385	CUNO.PANBASE	-0.270677	CUNO.P2/P3	PANBASE	P2/P3
CUNO	UNFILLED	0.8306	CUNO.UNFILLED	0.112321	CUNO.P2/P3	UNFILLED	P2/P3
CUNO	DTHD	0.0222	CUNO.DTHD	0.0891807	CUNO.P2/P3	DTHD	P2/P3
CUNO	CUDI	0.0031	CUNO.CUDI	0.272276	CUNO.P2/P3	CUDI	P2/P3
CUNO	CULT	0.079	CUNO.CULT	0.330026	CUNO.P2/P3	CULT	P2/P3
CUNO	DIST	0.0816	CUNO.DIST	0.230866	CUNO.P2/P3	DIST	P2/P3
CUNO	PNLG	0.5191	CUNO.PNLG	0.130567	CUNO.P2/P3	PNLG	P2/P3
CUNO	FLFWD	0.794	CUNO.FLFWD	0.0484896	CUNO.P2/P3	FLFWD	P2/P3
CUNO	2LWD	0.2927	CUNO.2LWD	0.171974	CUNO.P2/P3	2LWD	P2/P3
CUNO	SPKLT	0.123	CUNO.SPKLT	-0.254287	CUNO.P2/P3	SPKLT	P2/P3
CUNO	STLWD	0.428	CUNO.STLWD	-0.0281715	CUNO.P2/P3	STLWD	P2/P3
CUNO	SPKWD	0.3257	CUNO.SPKWD	-0.113648	CUNO.P2/P3	SPKWD	P2/P3
CUNO	STLLT	0.1127	CUNO.STLLT	-0.263273	CUNO.P2/P3	STLLT	P2/P3
CUNO	STYLT	0.0897	CUNO.STYLT	0.234957	CUNO.P2/P3	STYLT	P2/P3
CUNO	AWNLT	0.0386	CUNO.AWNLT	-0.139882	CUNO.P2/P3	AWNLT	P2/P3
CUNO	AWNWD	0.1085	CUNO.AWNWD	-0.00481041	CUNO.P2/P3	AWNWD	P2/P3
CUNO	STGLT	0.4588	CUNO.STGLT	0.0652511	CUNO.P2/P3	STGLT	P2/P3
CUNO	PAN2BR	0.0657	CUNO.PAN2BR	-0.181751	CUNO.P2/P3	PAN2BR	P2/P3
CUNO	LEAF	0.5503	CUNO.LEAF	-0.286325	CUNO.P2/P3	LEAF	P2/P3
CUNO	PANEXS	0.0898	CUNO.PANEXS	-0.105422	CUNO.P2/P3	PANEXS	P2/P3
CUNO	CUHABIT	0.1292	CUNO.CUHABIT	0.103963	CUNO.P2/P3	CUHABIT	P2/P3
CUNO	CUHABIT_VEG	0.3034	CUNO.CUHABIT_VEG	0.00660347	CUNO.P2/P3	CUHABIT_VEG	P2/P3
CUNO	FLAGATT	0.412	CUNO.FLAGATT	0.100606	CUNO.P2/P3	FLAGATT	P2/P3
CUNO	PANTYPE	0.0889	CUNO.PANTYPE	0.306696	CUNO.P2/P3	PANTYPE	P2/P3
CUNO	PAMB	0.6068	CUNO.PAMB	0.0519783	CUNO.P2/P3	PAMB	P2/P3
		1	CUNO.CUNO	0	CUNO.P2/P3	CUNO	P2/P3
PNNB	FERT	0.752	PNNB.FERT	0.0381413	PNNB.P2/P3	FERT	P2/P3
PNNB	FLFLG	0.8333	PNNB.FLFLG	-0.190721	PNNB.P2/P3	FLFLG	P2/P3
PNNB	2LLT	0.5422	PNNB.2LLT	-0.0658693	PNNB.P2/P3	2LLT	P2/P3
PNNB	ANTLT	0.0314	PNNB.ANTLT	-0.119852	PNNB.P2/P3	ANTLT	P2/P3
PNNB	LIGLT	0.3135	PNNB.LIGLT	-0.016089	PNNB.P2/P3	LIGLT	P2/P3
PNNB	PANBASE	0.7659	PNNB.PANBASE	-0.00424237	PNNB.P2/P3	PANBASE	P2/P3
PNNB	UNFILLED	0.2528	PNNB.UNFILLED	0.0774539	PNNB.P2/P3	UNFILLED	P2/P3
PNNB	DTHD	0.0129	PNNB.DTHD	0.110339	PNNB.P2/P3	DTHD	P2/P3
PNNB	CUDI	0.0065	PNNB.CUDI	0.240404	PNNB.P2/P3	CUDI	P2/P3
PNNB	CULT	0.2413	PNNB.CULT	0.104342	PNNB.P2/P3	CULT	P2/P3
PNNB	DIST	0.1486	PNNB.DIST	0.111744	PNNB.P2/P3	DIST	P2/P3
PNNB	PNLG	0.7975	PNNB.PNLG	-0.0213554	PNNB.P2/P3	PNLG	P2/P3
PNNB	FLFWD	0.325	PNNB.FLFWD	0.215772	PNNB.P2/P3	FLFWD	P2/P3
PNNB	2LWD	0.1294	PNNB.2LWD	0.243639	PNNB.P2/P3	2LWD	P2/P3
PNNB	SPKLT	0.4184	PNNB.SPKLT	-0.0188452	PNNB.P2/P3	SPKLT	P2/P3
PNNB	STLWD	0.3157	PNNB.STLWD	0.0739673	PNNB.P2/P3	STLWD	P2/P3
PNNB	SPKWD	0.0634	PNNB.SPKWD	0.229452	PNNB.P2/P3	SPKWD	P2/P3
PNNB	STLLT	0.3566	PNNB.STLLT	-0.0150001	PNNB.P2/P3	STLLT	P2/P3
PNNB	STYLT	0.6923	PNNB.STYLT	0.144037	PNNB.P2/P3	STYLT	P2/P3
PNNB	AWNLT	0.9938	PNNB.AWNLT	-0.348813	PNNB.P2/P3	AWNLT	P2/P3
PNNB	AWNWD	0.2913	PNNB.AWNWD	-0.242803	PNNB.P2/P3	AWNWD	P2/P3
PNNB	STGLT	0.5404	PNNB.STGLT	-0.129816	PNNB.P2/P3	STGLT	P2/P3
PNNB	PAN2BR	0.0195	PNNB.PAN2BR	0.0546766	PNNB.P2/P3	PAN2BR	P2/P3
PNNB	LEAF	0.1852	PNNB.LEAF	-0.327477	PNNB.P2/P3	LEAF	P2/P3
PNNB	PANEXS	0.0646	PNNB.PANEXS	-0.138587	PNNB.P2/P3	PANEXS	P2/P3
PNNB	CUHABIT	0.0166	PNNB.CUHABIT	0.0350116	PNNB.P2/P3	CUHABIT	P2/P3
PNNB	CUHABIT_VEG	0.5773	PNNB.CUHABIT_VEG	0.0557242	PNNB.P2/P3	CUHABIT_VEG	P2/P3
PNNB	FLAGATT	0.2047	PNNB.FLAGATT	0.029217	PNNB.P2/P3	FLAGATT	P2/P3
PNNB	PANTYPE	0.0042	PNNB.PANTYPE	0.443268	PNNB.P2/P3	PANTYPE	P2/P3
PNNB	PAMB	0.2308	PNNB.PAMB	0.0678637	PNNB.P2/P3	PAMB	P2/P3
PNNB	CUNO	0.114	PNNB.CUNO	0.528118	PNNB.P2/P3	CUNO	P2/P3
		1	PNNB.PNNB	0	PNNB.P2/P3	PNNB	P2/P3
FLFLG	FERT	0.6934	FLFLG.FERT	-0.0129309	FLFLG.P4	FERT	P4
2LLT	FERT	0.1149	2LLT.FERT	-0.251633	2LLT.P4	FERT	P4
2LLT	FLFLG	0.0342	2LLT.FLFLG	0.49673	2LLT.P4	FLFLG	P4
ANTLT	FERT	0.019	ANTLT.FERT	-0.485969	ANTLT.P4	FERT	P4
ANTLT	FLFLG	0.2208	ANTLT.FLFLG	-0.132815	ANTLT.P4	FLFLG	P4
ANTLT	2LLT	0.0263	ANTLT.2LLT	0.0403762	ANTLT.P4	2LLT	P4
LIGLT	FERT	0.2806	LIGLT.FERT	-0.274663	LIGLT.P4	FERT	P4
LIGLT	FLFLG	0.5225	LIGLT.FLFLG	0.164595	LIGLT.P4	FLFLG	P4
LIGLT	2LLT	0.9619	LIGLT.2LLT	0.489866	LIGLT.P4	2LLT	P4
LIGLT	ANTLT	0.0009	LIGLT.ANTLT	0.477285	LIGLT.P4	ANTLT	P4
PANBASE	FERT	0.9298	PANBASE.FERT	-0.173174	PANBASE.P4	FERT	P4
PANBASE	FLFLG	0.2326	PANBASE.FLFLG	-0.0533862	PANBASE.P4	FLFLG	P4
PANBASE	2LLT	0.6085	PANBASE.2LLT	0.158225	PANBASE.P4	2LLT	P4
PANBASE	ANTLT	0.2813	PANBASE.ANTLT	0.290139	PANBASE.P4	ANTLT	P4
PANBASE	LIGLT	0.0491	PANBASE.LIGLT	0.318464	PANBASE.P4	LIGLT	P4
UNFILLED	FERT	0.3236	UNFILLED.FERT	-0.815967	UNFILLED.P4	FERT	P4
UNFILLED	FLFLG	0.9851	UNFILLED.FLFLG	0.274152	UNFILLED.P4	FLFLG	P4
UNFILLED	2LLT	0.3214	UNFILLED.2LLT	0.35657	UNFILLED.P4	2LLT	P4
UNFILLED	ANTLT	0.0057	UNFILLED.ANTLT	0.340562	UNFILLED.P4	ANTLT	P4
UNFILLED	LIGLT	0.8087	UNFILLED.LIGLT	0.248063	UNFILLED.P4	LIGLT	P4
UNFILLED	PANBASE	0.5577	UNFILLED.PANBASE	0.223546	UNFILLED.P4	PANBASE	P4
DTHD	FERT	0.353	DTHD.FERT	-0.207916	DTHD.P4	FERT	P4
DTHD	FLFLG	0.0135	DTHD.FLFLG	-0.0825346	DTHD.P4	FLFLG	P4
DTHD	2LLT	0.0744	DTHD.2LLT	0.221472	DTHD.P4	2LLT	P4
DTHD	ANTLT	0.003	DTHD.ANTLT	0.446217	DTHD.P4	ANTLT	P4
DTHD	LIGLT	0.0072	DTHD.LIGLT	0.492503	DTHD.P4	LIGLT	P4
DTHD	PANBASE	0.0272	DTHD.PANBASE	0.26618	DTHD.P4	PANBASE	P4
DTHD	UNFILLED	0.513	DTHD.UNFILLED	0.0891571	DTHD.P4	UNFILLED	P4
CUDI	FERT	0.0006	CUDI.FERT	-0.392268	CUDI.P4	FERT	P4
CUDI	FLFLG	0.3655	CUDI.FLFLG	0.155883	CUDI.P4	FLFLG	P4
CUDI	2LLT	0.034	CUDI.2LLT	0.609521	CUDI.P4	2LLT	P4
CUDI	ANTLT	0.0018	CUDI.ANTLT	0.362722	CUDI.P4	ANTLT	P4
CUDI	LIGLT	0.0984	CUDI.LIGLT	0.562743	CUDI.P4	LIGLT	P4
CUDI	PANBASE	0.008	CUDI.PANBASE	0.314627	CUDI.P4	PANBASE	P4
CUDI	UNFILLED	0.0001	CUDI.UNFILLED	0.467739	CUDI.P4	UNFILLED	P4
CUDI	DTHD	0.6109	CUDI.DTHD	0.331318	CUDI.P4	DTHD	P4
CULT	FERT	0.0079	CULT.FERT	-0.405318	CULT.P4	FERT	P4
CULT	FLFLG	0.0377	CULT.FLFLG	0.12185	CULT.P4	FLFLG	P4
CULT	2LLT	0.0642	CULT.2LLT	0.433222	CULT.P4	2LLT	P4
CULT	ANTLT	0.0003	CULT.ANTLT	0.468684	CULT.P4	ANTLT	P4
CULT	LIGLT	0.0238	CULT.LIGLT	0.524863	CULT.P4	LIGLT	P4
CULT	PANBASE	0.1229	CULT.PANBASE	0.134966	CULT.P4	PANBASE	P4
CULT	UNFILLED	0.0447	CULT.UNFILLED	0.393023	CULT.P4	UNFILLED	P4
CULT	DTHD	0.0846	CULT.DTHD	0.659722	CULT.P4	DTHD	P4
CULT	CUDI	0.9621	CULT.CUDI	0.517583	CULT.P4	CUDI	P4
DIST	FERT	0.1703	DIST.FERT	-0.413725	DIST.P4	FERT	P4
DIST	FLFLG	0.3138	DIST.FLFLG	0.0627509	DIST.P4	FLFLG	P4
DIST	2LLT	0.0017	DIST.2LLT	0.483615	DIST.P4	2LLT	P4
DIST	ANTLT	0.0126	DIST.ANTLT	0.236536	DIST.P4	ANTLT	P4
DIST	LIGLT	0.876	DIST.LIGLT	0.257579	DIST.P4	LIGLT	P4
DIST	PANBASE	0.8699	DIST.PANBASE	0.00144142	DIST.P4	PANBASE	P4
DIST	UNFILLED	0.3818	DIST.UNFILLED	0.338136	DIST.P4	UNFILLED	P4
DIST	DTHD	0.3326	DIST.DTHD	0.326647	DIST.P4	DTHD	P4
DIST	CUDI	0.0219	DIST.CUDI	0.425576	DIST.P4	CUDI	P4
DIST	CULT	0.0104	DIST.CULT	0.492766	DIST.P4	CULT	P4
PNLG	FERT	0.0147	PNLG.FERT	-0.460653	PNLG.P4	FERT	P4
PNLG	FLFLG	0.6652	PNLG.FLFLG	0.333859	PNLG.P4	FLFLG	P4
PNLG	2LLT	0.5494	PNLG.2LLT	0.524194	PNLG.P4	2LLT	P4
PNLG	ANTLT	0.16	PNLG.ANTLT	0.248338	PNLG.P4	ANTLT	P4
PNLG	LIGLT	0.9302	PNLG.LIGLT	0.288609	PNLG.P4	LIGLT	P4
PNLG	PANBASE	0.4256	PNLG.PANBASE	0.109176	PNLG.P4	PANBASE	P4
PNLG	UNFILLED	0.0001	PNLG.UNFILLED	0.536507	PNLG.P4	UNFILLED	P4
PNLG	DTHD	0.6717	PNLG.DTHD	0.186572	PNLG.P4	DTHD	P4
PNLG	CUDI	0.2274	PNLG.CUDI	0.448417	PNLG.P4	CUDI	P4
PNLG	CULT	0.2684	PNLG.CULT	0.540242	PNLG.P4	CULT	P4
PNLG	DIST	0.0085	PNLG.DIST	0.627789	PNLG.P4	DIST	P4
FLFWD	FERT	0.1251	FLFWD.FERT	-0.0325769	FLFWD.P4	FERT	P4
FLFWD	FLFLG	0.2524	FLFWD.FLFLG	0.239143	FLFWD.P4	FLFLG	P4
FLFWD	2LLT	0.749	FLFWD.2LLT	0.0343872	FLFWD.P4	2LLT	P4
FLFWD	ANTLT	0.0085	FLFWD.ANTLT	-0.354436	FLFWD.P4	ANTLT	P4
FLFWD	LIGLT	0.0003	FLFWD.LIGLT	-0.322565	FLFWD.P4	LIGLT	P4
FLFWD	PANBASE	0.0297	FLFWD.PANBASE	-0.312661	FLFWD.P4	PANBASE	P4
FLFWD	UNFILLED	0.573	FLFWD.UNFILLED	0.185689	FLFWD.P4	UNFILLED	P4
FLFWD	DTHD	0.0003	FLFWD.DTHD	-0.458378	FLFWD.P4	DTHD	P4
FLFWD	CUDI	0.0046	FLFWD.CUDI	0.0297311	FLFWD.P4	CUDI	P4
FLFWD	CULT	0.0008	FLFWD.CULT	-0.291516	FLFWD.P4	CULT	P4
FLFWD	DIST	0.1511	FLFWD.DIST	-0.151177	FLFWD.P4	DIST	P4
FLFWD	PNLG	0.0101	FLFWD.PNLG	0.0410756	FLFWD.P4	PNLG	P4
2LWD	FERT	0.0086	2LWD.FERT	-0.264121	2LWD.P4	FERT	P4
2LWD	FLFLG	0.0198	2LWD.FLFLG	0.187252	2LWD.P4	FLFLG	P4
2LWD	2LLT	0.552	2LWD.2LLT	0.137383	2LWD.P4	2LLT	P4
2LWD	ANTLT	0.0016	2LWD.ANTLT	0.0428417	2LWD.P4	ANTLT	P4
2LWD	LIGLT	0.3509	2LWD.LIGLT	0.0144667	2LWD.P4	LIGLT	P4
2LWD	PANBASE	0.2529	2LWD.PANBASE	-0.134865	2LWD.P4	PANBASE	P4
2LWD	UNFILLED	0.0456	2LWD.UNFILLED	0.362329	2LWD.P4	UNFILLED	P4
2LWD	DTHD	0.0024	2LWD.DTHD	-0.128168	2LWD.P4	DTHD	P4
2LWD	CUDI	0.1394	2LWD.CUDI	0.363677	2LWD.P4	CUDI	P4
2LWD	CULT	0.0028	2LWD.CULT	0.154577	2LWD.P4	CULT	P4
2LWD	DIST	0.2369	2LWD.DIST	-0.00131082	2LWD.P4	DIST	P4
2LWD	PNLG	0.05	2LWD.PNLG	0.20092	2LWD.P4	PNLG	P4
2LWD	FLFWD	0.2648	2LWD.FLFWD	0.722479	2LWD.P4	FLFWD	P4
SPKLT	FERT	0.856	SPKLT.FERT	0.00657525	SPKLT.P4	FERT	P4
SPKLT	FLFLG	0.026	SPKLT.FLFLG	0.0724704	SPKLT.P4	FLFLG	P4
SPKLT	2LLT	0.0466	SPKLT.2LLT	0.108589	SPKLT.P4	2LLT	P4
SPKLT	ANTLT	0.3041	SPKLT.ANTLT	-0.0457106	SPKLT.P4	ANTLT	P4
SPKLT	LIGLT	0.6239	SPKLT.LIGLT	-0.0101975	SPKLT.P4	LIGLT	P4
SPKLT	PANBASE	0.2487	SPKLT.PANBASE	0.0744281	SPKLT.P4	PANBASE	P4
SPKLT	UNFILLED	0.5444	SPKLT.UNFILLED	-0.0838084	SPKLT.P4	UNFILLED	P4
SPKLT	DTHD	0.0002	SPKLT.DTHD	-0.250193	SPKLT.P4	DTHD	P4
SPKLT	CUDI	0.8436	SPKLT.CUDI	0.0890971	SPKLT.P4	CUDI	P4
SPKLT	CULT	0.0015	SPKLT.CULT	-0.335991	SPKLT.P4	CULT	P4
SPKLT	DIST	0.0182	SPKLT.DIST	-0.258761	SPKLT.P4	DIST	P4
SPKLT	PNLG	0.0838	SPKLT.PNLG	-0.0959413	SPKLT.P4	PNLG	P4
SPKLT	FLFWD	0.2295	SPKLT.FLFWD	0.15691	SPKLT.P4	FLFWD	P4
SPKLT	2LWD	0.3696	SPKLT.2LWD	0.0959182	SPKLT.P4	2LWD	P4
STLWD	FERT	0.4675	STLWD.FERT	-0.0277547	STLWD.P4	FERT	P4
STLWD	FLFLG	0.0637	STLWD.FLFLG	0.166789	STLWD.P4	FLFLG	P4
STLWD	2LLT	0.0181	STLWD.2LLT	0.259043	STLWD.P4	2LLT	P4
STLWD	ANTLT	0.1193	STLWD.ANTLT	0.174828	STLWD.P4	ANTLT	P4
STLWD	LIGLT	0.3836	STLWD.LIGLT	0.291382	STLWD.P4	LIGLT	P4
STLWD	PANBASE	0.0026	STLWD.PANBASE	0.1808	STLWD.P4	PANBASE	P4
STLWD	UNFILLED	0.0883	STLWD.UNFILLED	0.0908549	STLWD.P4	UNFILLED	P4
STLWD	DTHD	0.0203	STLWD.DTHD	0.0398397	STLWD.P4	DTHD	P4
STLWD	CUDI	0.7834	STLWD.CUDI	0.291535	STLWD.P4	CUDI	P4
STLWD	CULT	0.1809	STLWD.CULT	0.0313733	STLWD.P4	CULT	P4
STLWD	DIST	0.3964	STLWD.DIST	0.198727	STLWD.P4	DIST	P4
STLWD	PNLG	0.552	STLWD.PNLG	0.179429	STLWD.P4	PNLG	P4
STLWD	FLFWD	0.7259	STLWD.FLFWD	-0.159861	STLWD.P4	FLFWD	P4
STLWD	2LWD	0.2518	STLWD.2LWD	-0.0953967	STLWD.P4	2LWD	P4
STLWD	SPKLT	0.173	STLWD.SPKLT	0.365187	STLWD.P4	SPKLT	P4
SPKWD	FERT	0.3691	SPKWD.FERT	0.23835	SPKWD.P4	FERT	P4
SPKWD	FLFLG	0.0102	SPKWD.FLFLG	-0.00901728	SPKWD.P4	FLFLG	P4
SPKWD	2LLT	0.1996	SPKWD.2LLT	0.0189896	SPKWD.P4	2LLT	P4
SPKWD	ANTLT	0.0009	SPKWD.ANTLT	-0.411294	SPKWD.P4	ANTLT	P4
SPKWD	LIGLT	0.0439	SPKWD.LIGLT	-0.237201	SPKWD.P4	LIGLT	P4
SPKWD	PANBASE	0.2859	SPKWD.PANBASE	-0.0980601	SPKWD.P4	PANBASE	P4
SPKWD	UNFILLED	0.2364	SPKWD.UNFILLED	-0.173055	SPKWD.P4	UNFILLED	P4
SPKWD	DTHD	0.0534	SPKWD.DTHD	-0.415786	SPKWD.P4	DTHD	P4
SPKWD	CUDI	0.5404	SPKWD.CUDI	0.0339559	SPKWD.P4	CUDI	P4
SPKWD	CULT	0.0093	SPKWD.CULT	-0.519293	SPKWD.P4	CULT	P4
SPKWD	DIST	0.3514	SPKWD.DIST	-0.194732	SPKWD.P4	DIST	P4
SPKWD	PNLG	0.0997	SPKWD.PNLG	-0.289815	SPKWD.P4	PNLG	P4
SPKWD	FLFWD	0.0761	SPKWD.FLFWD	0.381335	SPKWD.P4	FLFWD	P4
SPKWD	2LWD	0.1918	SPKWD.2LWD	0.108719	SPKWD.P4	2LWD	P4
SPKWD	SPKLT	0.1017	SPKWD.SPKLT	0.444436	SPKWD.P4	SPKLT	P4
SPKWD	STLWD	0.996	SPKWD.STLWD	0.132279	SPKWD.P4	STLWD	P4
STLLT	FERT	0.1421	STLLT.FERT	0.317003	STLLT.P4	FERT	P4
STLLT	FLFLG	0.314	STLLT.FLFLG	-0.0291678	STLLT.P4	FLFLG	P4
STLLT	2LLT	0.464	STLLT.2LLT	-0.113902	STLLT.P4	2LLT	P4
STLLT	ANTLT	0.2082	STLLT.ANTLT	-0.205849	STLLT.P4	ANTLT	P4
STLLT	LIGLT	0.6874	STLLT.LIGLT	-0.0233412	STLLT.P4	LIGLT	P4
STLLT	PANBASE	0.2204	STLLT.PANBASE	0.0399943	STLLT.P4	PANBASE	P4
STLLT	UNFILLED	0.4497	STLLT.UNFILLED	-0.313244	STLLT.P4	UNFILLED	P4
STLLT	DTHD	0.1243	STLLT.DTHD	-0.329669	STLLT.P4	DTHD	P4
STLLT	CUDI	0.7358	STLLT.CUDI	-0.0628636	STLLT.P4	CUDI	P4
STLLT	CULT	0.0529	STLLT.CULT	-0.441082	STLLT.P4	CULT	P4
STLLT	DIST	0.3879	STLLT.DIST	-0.303368	STLLT.P4	DIST	P4
STLLT	PNLG	0.0679	STLLT.PNLG	-0.357902	STLLT.P4	PNLG	P4
STLLT	FLFWD	0.6467	STLLT.FLFWD	0.160978	STLLT.P4	FLFWD	P4
STLLT	2LWD	0.7734	STLLT.2LWD	-0.0262498	STLLT.P4	2LWD	P4
STLLT	SPKLT	0.2722	STLLT.SPKLT	0.586309	STLLT.P4	SPKLT	P4
STLLT	STLWD	0.8242	STLLT.STLWD	0.351433	STLLT.P4	STLWD	P4
STLLT	SPKWD	0.2041	STLLT.SPKWD	0.606892	STLLT.P4	SPKWD	P4
STYLT	FERT	0.1107	STYLT.FERT	-0.068957	STYLT.P4	FERT	P4
STYLT	FLFLG	0.6905	STYLT.FLFLG	0.114439	STYLT.P4	FLFLG	P4
STYLT	2LLT	0.3647	STYLT.2LLT	0.176628	STYLT.P4	2LLT	P4
STYLT	ANTLT	0.5685	STYLT.ANTLT	0.0111428	STYLT.P4	ANTLT	P4
STYLT	LIGLT	0.225	STYLT.LIGLT	0.162855	STYLT.P4	LIGLT	P4
STYLT	PANBASE	0.4933	STYLT.PANBASE	0.0750114	STYLT.P4	PANBASE	P4
STYLT	UNFILLED	0.1671	STYLT.UNFILLED	0.037681	STYLT.P4	UNFILLED	P4
STYLT	DTHD	0.2495	STYLT.DTHD	0.0747602	STYLT.P4	DTHD	P4
STYLT	CUDI	0.762	STYLT.CUDI	0.22915	STYLT.P4	CUDI	P4
STYLT	CULT	0.1026	STYLT.CULT	0.0332896	STYLT.P4	CULT	P4
STYLT	DIST	0.9079	STYLT.DIST	0.0841057	STYLT.P4	DIST	P4
STYLT	PNLG	0.3694	STYLT.PNLG	0.0781704	STYLT.P4	PNLG	P4
STYLT	FLFWD	0.6396	STYLT.FLFWD	-0.0620874	STYLT.P4	FLFWD	P4
STYLT	2LWD	0.5736	STYLT.2LWD	0.0459431	STYLT.P4	2LWD	P4
STYLT	SPKLT	0.6139	STYLT.SPKLT	0.505401	STYLT.P4	SPKLT	P4
STYLT	STLWD	0.014	STYLT.STLWD	0.586982	STYLT.P4	STLWD	P4
STYLT	SPKWD	0.3237	STYLT.SPKWD	0.114717	STYLT.P4	SPKWD	P4
STYLT	STLLT	0.1002	STYLT.STLLT	0.376084	STYLT.P4	STLLT	P4
AWNLT	FERT	0.5259	AWNLT.FERT	0.0462606	AWNLT.P4	FERT	P4
AWNLT	FLFLG	0.4974	AWNLT.FLFLG	-0.166708	AWNLT.P4	FLFLG	P4
AWNLT	2LLT	0.3839	AWNLT.2LLT	0.329817	AWNLT.P4	2LLT	P4
AWNLT	ANTLT	0.0086	AWNLT.ANTLT	0.102836	AWNLT.P4	ANTLT	P4
AWNLT	LIGLT	0.7794	AWNLT.LIGLT	0.342938	AWNLT.P4	LIGLT	P4
AWNLT	PANBASE	0.2669	AWNLT.PANBASE	0.153398	AWNLT.P4	PANBASE	P4
AWNLT	UNFILLED	0.7993	AWNLT.UNFILLED	-0.189266	AWNLT.P4	UNFILLED	P4
AWNLT	DTHD	0.0024	AWNLT.DTHD	0.508703	AWNLT.P4	DTHD	P4
AWNLT	CUDI	0.1574	AWNLT.CUDI	0.289268	AWNLT.P4	CUDI	P4
AWNLT	CULT	0.2955	AWNLT.CULT	0.278198	AWNLT.P4	CULT	P4
AWNLT	DIST	0.0469	AWNLT.DIST	0.30937	AWNLT.P4	DIST	P4
AWNLT	PNLG	0.7552	AWNLT.PNLG	0.125697	AWNLT.P4	PNLG	P4
AWNLT	FLFWD	0.3497	AWNLT.FLFWD	-0.261636	AWNLT.P4	FLFWD	P4
AWNLT	2LWD	0.5667	AWNLT.2LWD	-0.0652607	AWNLT.P4	2LWD	P4
AWNLT	SPKLT	0.2685	AWNLT.SPKLT	-0.00159482	AWNLT.P4	SPKLT	P4
AWNLT	STLWD	0.2303	AWNLT.STLWD	0.213069	AWNLT.P4	STLWD	P4
AWNLT	SPKWD	0.1949	AWNLT.SPKWD	-0.0684952	AWNLT.P4	SPKWD	P4
AWNLT	STLLT	0.6	AWNLT.STLLT	-0.0235785	AWNLT.P4	STLLT	P4
AWNLT	STYLT	0.589	AWNLT.STYLT	0.136431	AWNLT.P4	STYLT	P4
AWNWD	FERT	0.8777	AWNWD.FERT	0.0451349	AWNWD.P4	FERT	P4
AWNWD	FLFLG	0.5696	AWNWD.FLFLG	-0.0649794	AWNWD.P4	FLFLG	P4
AWNWD	2LLT	0.3448	AWNWD.2LLT	0.11708	AWNWD.P4	2LLT	P4
AWNWD	ANTLT	0.9044	AWNWD.ANTLT	-0.270726	AWNWD.P4	ANTLT	P4
AWNWD	LIGLT	0.4042	AWNWD.LIGLT	0.111647	AWNWD.P4	LIGLT	P4
AWNWD	PANBASE	0.082	AWNWD.PANBASE	0.183722	AWNWD.P4	PANBASE	P4
AWNWD	UNFILLED	0.8823	AWNWD.UNFILLED	-0.0840749	AWNWD.P4	UNFILLED	P4
AWNWD	DTHD	0.4497	AWNWD.DTHD	0.0563332	AWNWD.P4	DTHD	P4
AWNWD	CUDI	0.7404	AWNWD.CUDI	0.0942699	AWNWD.P4	CUDI	P4
AWNWD	CULT	0.5694	AWNWD.CULT	-0.215549	AWNWD.P4	CULT	P4
AWNWD	DIST	0.3275	AWNWD.DIST	0.0343521	AWNWD.P4	DIST	P4
AWNWD	PNLG	0.2496	AWNWD.PNLG	-0.111736	AWNWD.P4	PNLG	P4
AWNWD	FLFWD	0.0839	AWNWD.FLFWD	0.154175	AWNWD.P4	FLFWD	P4
AWNWD	2LWD	0.2241	AWNWD.2LWD	-0.0378188	AWNWD.P4	2LWD	P4
AWNWD	SPKLT	0.0223	AWNWD.SPKLT	0.171978	AWNWD.P4	SPKLT	P4
AWNWD	STLWD	0.1132	AWNWD.STLWD	0.0579681	AWNWD.P4	STLWD	P4
AWNWD	SPKWD	0.0162	AWNWD.SPKWD	0.435979	AWNWD.P4	SPKWD	P4
AWNWD	STLLT	0.0377	AWNWD.STLLT	0.309169	AWNWD.P4	STLLT	P4
AWNWD	STYLT	0.6008	AWNWD.STYLT	0.0212065	AWNWD.P4	STYLT	P4
AWNWD	AWNLT	0.0028	AWNWD.AWNLT	0.398151	AWNWD.P4	AWNLT	P4
STGLT	FERT	0.0077	STGLT.FERT	0.122854	STGLT.P4	FERT	P4
STGLT	FLFLG	0.8839	STGLT.FLFLG	0.0529877	STGLT.P4	FLFLG	P4
STGLT	2LLT	0.8149	STGLT.2LLT	-0.00164361	STGLT.P4	2LLT	P4
STGLT	ANTLT	0.2576	STGLT.ANTLT	0.144033	STGLT.P4	ANTLT	P4
STGLT	LIGLT	0.9443	STGLT.LIGLT	0.112144	STGLT.P4	LIGLT	P4
STGLT	PANBASE	0.6713	STGLT.PANBASE	0.0227834	STGLT.P4	PANBASE	P4
STGLT	UNFILLED	0.2048	STGLT.UNFILLED	-0.179925	STGLT.P4	UNFILLED	P4
STGLT	DTHD	0.7075	STGLT.DTHD	0.0806682	STGLT.P4	DTHD	P4
STGLT	CUDI	0.3585	STGLT.CUDI	0.0401544	STGLT.P4	CUDI	P4
STGLT	CULT	0.1802	STGLT.CULT	-0.0824665	STGLT.P4	CULT	P4
STGLT	DIST	0.119	STGLT.DIST	0.106274	STGLT.P4	DIST	P4
STGLT	PNLG	0.312	STGLT.PNLG	-0.161617	STGLT.P4	PNLG	P4
STGLT	FLFWD	0.1903	STGLT.FLFWD	-0.151849	STGLT.P4	FLFWD	P4
STGLT	2LWD	0.1984	STGLT.2LWD	-0.217148	STGLT.P4	2LWD	P4
STGLT	SPKLT	0.9734	STGLT.SPKLT	0.095998	STGLT.P4	SPKLT	P4
STGLT	STLWD	0.1091	STGLT.STLWD	-0.0495179	STGLT.P4	STLWD	P4
STGLT	SPKWD	0.0212	STGLT.SPKWD	0.108923	STGLT.P4	SPKWD	P4
STGLT	STLLT	0.4926	STGLT.STLLT	0.162182	STGLT.P4	STLLT	P4
STGLT	STYLT	0.2903	STGLT.STYLT	0.141812	STGLT.P4	STYLT	P4
STGLT	AWNLT	0.6121	STGLT.AWNLT	-0.0688799	STGLT.P4	AWNLT	P4
STGLT	AWNWD	0.882	STGLT.AWNWD	0.0909091	STGLT.P4	AWNWD	P4
PAN2BR	FERT	0.4993	PAN2BR.FERT	0.139252	PAN2BR.P4	FERT	P4
PAN2BR	FLFLG	0.1917	PAN2BR.FLFLG	-0.165806	PAN2BR.P4	FLFLG	P4
PAN2BR	2LLT	0.135	PAN2BR.2LLT	0.027342	PAN2BR.P4	2LLT	P4
PAN2BR	ANTLT	0.6818	PAN2BR.ANTLT	-0.116949	PAN2BR.P4	ANTLT	P4
PAN2BR	LIGLT	0.7737	PAN2BR.LIGLT	-0.0223794	PAN2BR.P4	LIGLT	P4
PAN2BR	PANBASE	0.7322	PAN2BR.PANBASE	-0.147469	PAN2BR.P4	PANBASE	P4
PAN2BR	UNFILLED	0.657	PAN2BR.UNFILLED	-0.201677	PAN2BR.P4	UNFILLED	P4
PAN2BR	DTHD	0.7844	PAN2BR.DTHD	0.0260342	PAN2BR.P4	DTHD	P4
PAN2BR	CUDI	0.2232	PAN2BR.CUDI	-0.117705	PAN2BR.P4	CUDI	P4
PAN2BR	CULT	0.4338	PAN2BR.CULT	0.0247601	PAN2BR.P4	CULT	P4
PAN2BR	DIST	0.6105	PAN2BR.DIST	-0.0199195	PAN2BR.P4	DIST	P4
PAN2BR	PNLG	0.0276	PAN2BR.PNLG	-0.253353	PAN2BR.P4	PNLG	P4
PAN2BR	FLFWD	0.4152	PAN2BR.FLFWD	-0.092641	PAN2BR.P4	FLFWD	P4
PAN2BR	2LWD	0.7186	PAN2BR.2LWD	-0.0346186	PAN2BR.P4	2LWD	P4
PAN2BR	SPKLT	0.6717	PAN2BR.SPKLT	0.106218	PAN2BR.P4	SPKLT	P4
PAN2BR	STLWD	0.8566	PAN2BR.STLWD	0.00110846	PAN2BR.P4	STLWD	P4
PAN2BR	SPKWD	0.2228	PAN2BR.SPKWD	0.0838451	PAN2BR.P4	SPKWD	P4
PAN2BR	STLLT	0.3637	PAN2BR.STLLT	0.154048	PAN2BR.P4	STLLT	P4
PAN2BR	STYLT	0.6694	PAN2BR.STYLT	0.222833	PAN2BR.P4	STYLT	P4
PAN2BR	AWNLT	0.7728	PAN2BR.AWNLT	0.104754	PAN2BR.P4	AWNLT	P4
PAN2BR	AWNWD	0.252	PAN2BR.AWNWD	-0.019935	PAN2BR.P4	AWNWD	P4
PAN2BR	STGLT	0.096	PAN2BR.STGLT	0.0979663	PAN2BR.P4	STGLT	P4
LEAF	FERT	0.5327	LEAF.FERT	0.0918082	LEAF.P4	FERT	P4
LEAF	FLFLG	0.6923	LEAF.FLFLG	0.129494	LEAF.P4	FLFLG	P4
LEAF	2LLT	0.7385	LEAF.2LLT	0.186349	LEAF.P4	2LLT	P4
LEAF	ANTLT	0.7681	LEAF.ANTLT	0.0417182	LEAF.P4	ANTLT	P4
LEAF	LIGLT	0.3269	LEAF.LIGLT	0.136059	LEAF.P4	LIGLT	P4
LEAF	PANBASE	0.1485	LEAF.PANBASE	0.161914	LEAF.P4	PANBASE	P4
LEAF	UNFILLED	0.9304	LEAF.UNFILLED	-0.0271879	LEAF.P4	UNFILLED	P4
LEAF	DTHD	0.1733	LEAF.DTHD	0.0923872	LEAF.P4	DTHD	P4
LEAF	CUDI	0.3065	LEAF.CUDI	0.135459	LEAF.P4	CUDI	P4
LEAF	CULT	0.4778	LEAF.CULT	0.15563	LEAF.P4	CULT	P4
LEAF	DIST	0.7049	LEAF.DIST	-0.00814434	LEAF.P4	DIST	P4
LEAF	PNLG	0.3993	LEAF.PNLG	0.216171	LEAF.P4	PNLG	P4
LEAF	FLFWD	0.5016	LEAF.FLFWD	-0.055522	LEAF.P4	FLFWD	P4
LEAF	2LWD	0.3918	LEAF.2LWD	0.0769402	LEAF.P4	2LWD	P4
LEAF	SPKLT	0.3931	LEAF.SPKLT	-0.118913	LEAF.P4	SPKLT	P4
LEAF	STLWD	0.2744	LEAF.STLWD	-0.0354361	LEAF.P4	STLWD	P4
LEAF	SPKWD	0.0283	LEAF.SPKWD	-0.287414	LEAF.P4	SPKWD	P4
LEAF	STLLT	0.2343	LEAF.STLLT	-0.193479	LEAF.P4	STLLT	P4
LEAF	STYLT	0.0293	LEAF.STYLT	-0.0310901	LEAF.P4	STYLT	P4
LEAF	AWNLT	0.7699	LEAF.AWNLT	0.137121	LEAF.P4	AWNLT	P4
LEAF	AWNWD	0.2033	LEAF.AWNWD	-0.226502	LEAF.P4	AWNWD	P4
LEAF	STGLT	0.1947	LEAF.STGLT	-0.210145	LEAF.P4	STGLT	P4
LEAF	PAN2BR	0.4788	LEAF.PAN2BR	-0.281001	LEAF.P4	PAN2BR	P4
PANEXS	FERT	0.0773	PANEXS.FERT	-0.183855	PANEXS.P4	FERT	P4
PANEXS	FLFLG	0.2142	PANEXS.FLFLG	0.0279479	PANEXS.P4	FLFLG	P4
PANEXS	2LLT	0.1397	PANEXS.2LLT	-0.0473324	PANEXS.P4	2LLT	P4
PANEXS	ANTLT	0.4515	PANEXS.ANTLT	0.236451	PANEXS.P4	ANTLT	P4
PANEXS	LIGLT	0.3156	PANEXS.LIGLT	-0.0462915	PANEXS.P4	LIGLT	P4
PANEXS	PANBASE	0.6083	PANEXS.PANBASE	0.152727	PANEXS.P4	PANBASE	P4
PANEXS	UNFILLED	0.2404	PANEXS.UNFILLED	0.212638	PANEXS.P4	UNFILLED	P4
PANEXS	DTHD	0.1711	PANEXS.DTHD	0.166118	PANEXS.P4	DTHD	P4
PANEXS	CUDI	0.5716	PANEXS.CUDI	0.0276803	PANEXS.P4	CUDI	P4
PANEXS	CULT	0.099	PANEXS.CULT	0.0822069	PANEXS.P4	CULT	P4
PANEXS	DIST	0.6148	PANEXS.DIST	-0.0572877	PANEXS.P4	DIST	P4
PANEXS	PNLG	0.7885	PANEXS.PNLG	-0.0542035	PANEXS.P4	PNLG	P4
PANEXS	FLFWD	0.3374	PANEXS.FLFWD	0.0698481	PANEXS.P4	FLFWD	P4
PANEXS	2LWD	0.4023	PANEXS.2LWD	0.15421	PANEXS.P4	2LWD	P4
PANEXS	SPKLT	0.8598	PANEXS.SPKLT	0.00724386	PANEXS.P4	SPKLT	P4
PANEXS	STLWD	0.9365	PANEXS.STLWD	-0.117777	PANEXS.P4	STLWD	P4
PANEXS	SPKWD	0.2055	PANEXS.SPKWD	-0.195877	PANEXS.P4	SPKWD	P4
PANEXS	STLLT	0.1311	PANEXS.STLLT	-0.254592	PANEXS.P4	STLLT	P4
PANEXS	STYLT	0.9442	PANEXS.STYLT	-0.0735506	PANEXS.P4	STYLT	P4
PANEXS	AWNLT	0.8791	PANEXS.AWNLT	-0.035827	PANEXS.P4	AWNLT	P4
PANEXS	AWNWD	0.9228	PANEXS.AWNWD	0.000206712	PANEXS.P4	AWNWD	P4
PANEXS	STGLT	0.8244	PANEXS.STGLT	-0.0665085	PANEXS.P4	STGLT	P4
PANEXS	PAN2BR	0.4968	PANEXS.PAN2BR	-0.226701	PANEXS.P4	PAN2BR	P4
PANEXS	LEAF	0.7455	PANEXS.LEAF	0.0672355	PANEXS.P4	LEAF	P4
CUHABIT	FERT	0.0863	CUHABIT.FERT	-0.179371	CUHABIT.P4	FERT	P4
CUHABIT	FLFLG	0.3399	CUHABIT.FLFLG	0.0215923	CUHABIT.P4	FLFLG	P4
CUHABIT	2LLT	0.1435	CUHABIT.2LLT	0.0428262	CUHABIT.P4	2LLT	P4
CUHABIT	ANTLT	0.163	CUHABIT.ANTLT	0.14848	CUHABIT.P4	ANTLT	P4
CUHABIT	LIGLT	0.5391	CUHABIT.LIGLT	-0.0473343	CUHABIT.P4	LIGLT	P4
CUHABIT	PANBASE	0.4187	CUHABIT.PANBASE	-0.0608869	CUHABIT.P4	PANBASE	P4
CUHABIT	UNFILLED	0.1053	CUHABIT.UNFILLED	0.0947494	CUHABIT.P4	UNFILLED	P4
CUHABIT	DTHD	0.2836	CUHABIT.DTHD	0.343251	CUHABIT.P4	DTHD	P4
CUHABIT	CUDI	0.7768	CUHABIT.CUDI	0.00352436	CUHABIT.P4	CUDI	P4
CUHABIT	CULT	0.2116	CUHABIT.CULT	0.178339	CUHABIT.P4	CULT	P4
CUHABIT	DIST	0.0368	CUHABIT.DIST	0.338433	CUHABIT.P4	DIST	P4
CUHABIT	PNLG	0.1409	CUHABIT.PNLG	0.247663	CUHABIT.P4	PNLG	P4
CUHABIT	FLFWD	0.8512	CUHABIT.FLFWD	-0.076182	CUHABIT.P4	FLFWD	P4
CUHABIT	2LWD	0.8142	CUHABIT.2LWD	-0.0627933	CUHABIT.P4	2LWD	P4
CUHABIT	SPKLT	0.1733	CUHABIT.SPKLT	-0.236993	CUHABIT.P4	SPKLT	P4
CUHABIT	STLWD	0.839	CUHABIT.STLWD	-0.149942	CUHABIT.P4	STLWD	P4
CUHABIT	SPKWD	0.0349	CUHABIT.SPKWD	-0.220749	CUHABIT.P4	SPKWD	P4
CUHABIT	STLLT	0.035	CUHABIT.STLLT	-0.333143	CUHABIT.P4	STLLT	P4
CUHABIT	STYLT	0.7393	CUHABIT.STYLT	-0.107226	CUHABIT.P4	STYLT	P4
CUHABIT	AWNLT	0.3527	CUHABIT.AWNLT	0.264494	CUHABIT.P4	AWNLT	P4
CUHABIT	AWNWD	0.2965	CUHABIT.AWNWD	0.0896678	CUHABIT.P4	AWNWD	P4
CUHABIT	STGLT	0.4201	CUHABIT.STGLT	0.124542	CUHABIT.P4	STGLT	P4
CUHABIT	PAN2BR	0.6139	CUHABIT.PAN2BR	-0.313385	CUHABIT.P4	PAN2BR	P4
CUHABIT	LEAF	0.1917	CUHABIT.LEAF	-0.0592387	CUHABIT.P4	LEAF	P4
CUHABIT	PANEXS	0.2039	CUHABIT.PANEXS	0.249049	CUHABIT.P4	PANEXS	P4
CUHABIT_VEG	FERT	0.6464	CUHABIT_VEG.FERT	-0.247864	CUHABIT_VEG.P4	FERT	P4
CUHABIT_VEG	FLFLG	0.3139	CUHABIT_VEG.FLFLG	-0.0258748	CUHABIT_VEG.P4	FLFLG	P4
CUHABIT_VEG	2LLT	0.2731	CUHABIT_VEG.2LLT	0.170472	CUHABIT_VEG.P4	2LLT	P4
CUHABIT_VEG	ANTLT	0.0583	CUHABIT_VEG.ANTLT	0.376304	CUHABIT_VEG.P4	ANTLT	P4
CUHABIT_VEG	LIGLT	0.7566	CUHABIT_VEG.LIGLT	0.103221	CUHABIT_VEG.P4	LIGLT	P4
CUHABIT_VEG	PANBASE	0.5743	CUHABIT_VEG.PANBASE	0.178697	CUHABIT_VEG.P4	PANBASE	P4
CUHABIT_VEG	UNFILLED	0.3799	CUHABIT_VEG.UNFILLED	0.224358	CUHABIT_VEG.P4	UNFILLED	P4
CUHABIT_VEG	DTHD	0.6036	CUHABIT_VEG.DTHD	0.211834	CUHABIT_VEG.P4	DTHD	P4
CUHABIT_VEG	CUDI	0.2039	CUHABIT_VEG.CUDI	0.230125	CUHABIT_VEG.P4	CUDI	P4
CUHABIT_VEG	CULT	0.3491	CUHABIT_VEG.CULT	0.286115	CUHABIT_VEG.P4	CULT	P4
CUHABIT_VEG	DIST	0.2129	CUHABIT_VEG.DIST	0.362361	CUHABIT_VEG.P4	DIST	P4
CUHABIT_VEG	PNLG	0.1639	CUHABIT_VEG.PNLG	0.324036	CUHABIT_VEG.P4	PNLG	P4
CUHABIT_VEG	FLFWD	0.254	CUHABIT_VEG.FLFWD	-0.2027	CUHABIT_VEG.P4	FLFWD	P4
CUHABIT_VEG	2LWD	0.7596	CUHABIT_VEG.2LWD	-0.0333747	CUHABIT_VEG.P4	2LWD	P4
CUHABIT_VEG	SPKLT	0.8201	CUHABIT_VEG.SPKLT	0.0141851	CUHABIT_VEG.P4	SPKLT	P4
CUHABIT_VEG	STLWD	0.1013	CUHABIT_VEG.STLWD	0.281863	CUHABIT_VEG.P4	STLWD	P4
CUHABIT_VEG	SPKWD	0.3284	CUHABIT_VEG.SPKWD	-0.223009	CUHABIT_VEG.P4	SPKWD	P4
CUHABIT_VEG	STLLT	0.6071	CUHABIT_VEG.STLLT	-0.149753	CUHABIT_VEG.P4	STLLT	P4
CUHABIT_VEG	STYLT	0.581	CUHABIT_VEG.STYLT	-0.092746	CUHABIT_VEG.P4	STYLT	P4
CUHABIT_VEG	AWNLT	0.0165	CUHABIT_VEG.AWNLT	0.264118	CUHABIT_VEG.P4	AWNLT	P4
CUHABIT_VEG	AWNWD	0.9755	CUHABIT_VEG.AWNWD	0.0421189	CUHABIT_VEG.P4	AWNWD	P4
CUHABIT_VEG	STGLT	0.4089	CUHABIT_VEG.STGLT	-0.149412	CUHABIT_VEG.P4	STGLT	P4
CUHABIT_VEG	PAN2BR	0.5006	CUHABIT_VEG.PAN2BR	-0.12793	CUHABIT_VEG.P4	PAN2BR	P4
CUHABIT_VEG	LEAF	0.5117	CUHABIT_VEG.LEAF	0.105171	CUHABIT_VEG.P4	LEAF	P4
CUHABIT_VEG	PANEXS	0.8076	CUHABIT_VEG.PANEXS	0.167865	CUHABIT_VEG.P4	PANEXS	P4
CUHABIT_VEG	CUHABIT	0.0974	CUHABIT_VEG.CUHABIT	0.339735	CUHABIT_VEG.P4	CUHABIT	P4
FLAGATT	FERT	0.6863	FLAGATT.FERT	0.0402396	FLAGATT.P4	FERT	P4
FLAGATT	FLFLG	0.6968	FLAGATT.FLFLG	-0.0163977	FLAGATT.P4	FLFLG	P4
FLAGATT	2LLT	0.1129	FLAGATT.2LLT	0.135046	FLAGATT.P4	2LLT	P4
FLAGATT	ANTLT	0.9618	FLAGATT.ANTLT	0.0145944	FLAGATT.P4	ANTLT	P4
FLAGATT	LIGLT	0.3224	FLAGATT.LIGLT	-0.143087	FLAGATT.P4	LIGLT	P4
FLAGATT	PANBASE	0.5477	FLAGATT.PANBASE	-0.0810177	FLAGATT.P4	PANBASE	P4
FLAGATT	UNFILLED	0.3038	FLAGATT.UNFILLED	0.0878171	FLAGATT.P4	UNFILLED	P4
FLAGATT	DTHD	0.8193	FLAGATT.DTHD	0.0117439	FLAGATT.P4	DTHD	P4
FLAGATT	CUDI	0.4901	FLAGATT.CUDI	0.138107	FLAGATT.P4	CUDI	P4
FLAGATT	CULT	0.2179	FLAGATT.CULT	0.0494845	FLAGATT.P4	CULT	P4
FLAGATT	DIST	0.1633	FLAGATT.DIST	0.151029	FLAGATT.P4	DIST	P4
FLAGATT	PNLG	0.383	FLAGATT.PNLG	0.0547143	FLAGATT.P4	PNLG	P4
FLAGATT	FLFWD	0.4	FLAGATT.FLFWD	-0.0243077	FLAGATT.P4	FLFWD	P4
FLAGATT	2LWD	0.5743	FLAGATT.2LWD	0.0158247	FLAGATT.P4	2LWD	P4
FLAGATT	SPKLT	0.5676	FLAGATT.SPKLT	0.0379719	FLAGATT.P4	SPKLT	P4
FLAGATT	STLWD	0.4915	FLAGATT.STLWD	0.130527	FLAGATT.P4	STLWD	P4
FLAGATT	SPKWD	0.2887	FLAGATT.SPKWD	0.174603	FLAGATT.P4	SPKWD	P4
FLAGATT	STLLT	0.8064	FLAGATT.STLLT	0.0285459	FLAGATT.P4	STLLT	P4
FLAGATT	STYLT	0.9388	FLAGATT.STYLT	0.093778	FLAGATT.P4	STYLT	P4
FLAGATT	AWNLT	0.3296	FLAGATT.AWNLT	0.0659756	FLAGATT.P4	AWNLT	P4
FLAGATT	AWNWD	0.8698	FLAGATT.AWNWD	-0.103995	FLAGATT.P4	AWNWD	P4
FLAGATT	STGLT	0.8964	FLAGATT.STGLT	0.0736327	FLAGATT.P4	STGLT	P4
FLAGATT	PAN2BR	0.9753	FLAGATT.PAN2BR	-0.142665	FLAGATT.P4	PAN2BR	P4
FLAGATT	LEAF	0.8341	FLAGATT.LEAF	0.155453	FLAGATT.P4	LEAF	P4
FLAGATT	PANEXS	0.5439	FLAGATT.PANEXS	0.204284	FLAGATT.P4	PANEXS	P4
FLAGATT	CUHABIT	0.633	FLAGATT.CUHABIT	0.166716	FLAGATT.P4	CUHABIT	P4
FLAGATT	CUHABIT_VEG	0.2514	FLAGATT.CUHABIT_VEG	0.194984	FLAGATT.P4	CUHABIT_VEG	P4
PANTYPE	FERT	0.9915	PANTYPE.FERT	-0.0661071	PANTYPE.P4	FERT	P4
PANTYPE	FLFLG	0.1432	PANTYPE.FLFLG	0.0387117	PANTYPE.P4	FLFLG	P4
PANTYPE	2LLT	0.2156	PANTYPE.2LLT	0.150941	PANTYPE.P4	2LLT	P4
PANTYPE	ANTLT	0.8049	PANTYPE.ANTLT	-0.0595785	PANTYPE.P4	ANTLT	P4
PANTYPE	LIGLT	0.3334	PANTYPE.LIGLT	-0.109365	PANTYPE.P4	LIGLT	P4
PANTYPE	PANBASE	0.6782	PANTYPE.PANBASE	0.0368407	PANTYPE.P4	PANBASE	P4
PANTYPE	UNFILLED	0.9993	PANTYPE.UNFILLED	0.0884534	PANTYPE.P4	UNFILLED	P4
PANTYPE	DTHD	0.3091	PANTYPE.DTHD	-0.0728907	PANTYPE.P4	DTHD	P4
PANTYPE	CUDI	0.5628	PANTYPE.CUDI	-0.0615362	PANTYPE.P4	CUDI	P4
PANTYPE	CULT	0.1658	PANTYPE.CULT	-0.136809	PANTYPE.P4	CULT	P4
PANTYPE	DIST	0.9614	PANTYPE.DIST	0.106703	PANTYPE.P4	DIST	P4
PANTYPE	PNLG	0.7564	PANTYPE.PNLG	0.0739758	PANTYPE.P4	PNLG	P4
PANTYPE	FLFWD	0.5875	PANTYPE.FLFWD	-0.0430326	PANTYPE.P4	FLFWD	P4
PANTYPE	2LWD	0.1469	PANTYPE.2LWD	-0.182871	PANTYPE.P4	2LWD	P4
PANTYPE	SPKLT	0.7432	PANTYPE.SPKLT	0.0444464	PANTYPE.P4	SPKLT	P4
PANTYPE	STLWD	0.6581	PANTYPE.STLWD	0.0598888	PANTYPE.P4	STLWD	P4
PANTYPE	SPKWD	0.3843	PANTYPE.SPKWD	0.0787442	PANTYPE.P4	SPKWD	P4
PANTYPE	STLLT	0.7573	PANTYPE.STLLT	-0.025129	PANTYPE.P4	STLLT	P4
PANTYPE	STYLT	0.883	PANTYPE.STYLT	0.00599795	PANTYPE.P4	STYLT	P4
PANTYPE	AWNLT	0.6586	PANTYPE.AWNLT	-0.103727	PANTYPE.P4	AWNLT	P4
PANTYPE	AWNWD	0.713	PANTYPE.AWNWD	0.0880829	PANTYPE.P4	AWNWD	P4
PANTYPE	STGLT	0.3978	PANTYPE.STGLT	0.231917	PANTYPE.P4	STGLT	P4
PANTYPE	PAN2BR	0.069	PANTYPE.PAN2BR	-0.192052	PANTYPE.P4	PAN2BR	P4
PANTYPE	LEAF	0.4487	PANTYPE.LEAF	-0.0200053	PANTYPE.P4	LEAF	P4
PANTYPE	PANEXS	0.8584	PANTYPE.PANEXS	0.181276	PANTYPE.P4	PANEXS	P4
PANTYPE	CUHABIT	0.0511	PANTYPE.CUHABIT	0.018386	PANTYPE.P4	CUHABIT	P4
PANTYPE	CUHABIT_VEG	0.0995	PANTYPE.CUHABIT_VEG	0.00274449	PANTYPE.P4	CUHABIT_VEG	P4
PANTYPE	FLAGATT	0.5448	PANTYPE.FLAGATT	0.335227	PANTYPE.P4	FLAGATT	P4
PAMB	FERT	0.0194	PAMB.FERT	0.00245765	PAMB.P4	FERT	P4
PAMB	FLFLG	0.4918	PAMB.FLFLG	-0.0259274	PAMB.P4	FLFLG	P4
PAMB	2LLT	0.808	PAMB.2LLT	0.0196967	PAMB.P4	2LLT	P4
PAMB	ANTLT	0.0902	PAMB.ANTLT	-0.126043	PAMB.P4	ANTLT	P4
PAMB	LIGLT	0.0899	PAMB.LIGLT	-0.0387342	PAMB.P4	LIGLT	P4
PAMB	PANBASE	0.7526	PAMB.PANBASE	-0.0460014	PAMB.P4	PANBASE	P4
PAMB	UNFILLED	0.1052	PAMB.UNFILLED	-0.0910209	PAMB.P4	UNFILLED	P4
PAMB	DTHD	0.1208	PAMB.DTHD	-0.101638	PAMB.P4	DTHD	P4
PAMB	CUDI	0.2719	PAMB.CUDI	-0.0816202	PAMB.P4	CUDI	P4
PAMB	CULT	0.465	PAMB.CULT	-0.0186923	PAMB.P4	CULT	P4
PAMB	DIST	0.4596	PAMB.DIST	-0.0288327	PAMB.P4	DIST	P4
PAMB	PNLG	0.8985	PAMB.PNLG	-0.0806879	PAMB.P4	PNLG	P4
PAMB	FLFWD	0.8503	PAMB.FLFWD	0.0656219	PAMB.P4	FLFWD	P4
PAMB	2LWD	0.9288	PAMB.2LWD	0.0485058	PAMB.P4	2LWD	P4
PAMB	SPKLT	0.2824	PAMB.SPKLT	0.139961	PAMB.P4	SPKLT	P4
PAMB	STLWD	0.7955	PAMB.STLWD	0.100562	PAMB.P4	STLWD	P4
PAMB	SPKWD	0.911	PAMB.SPKWD	0.0824432	PAMB.P4	SPKWD	P4
PAMB	STLLT	0.8271	PAMB.STLLT	0.102555	PAMB.P4	STLLT	P4
PAMB	STYLT	0.6602	PAMB.STYLT	0.0989894	PAMB.P4	STYLT	P4
PAMB	AWNLT	0.5005	PAMB.AWNLT	-0.216106	PAMB.P4	AWNLT	P4
PAMB	AWNWD	0.7971	PAMB.AWNWD	-0.0245998	PAMB.P4	AWNWD	P4
PAMB	STGLT	0.1965	PAMB.STGLT	0.041831	PAMB.P4	STGLT	P4
PAMB	PAN2BR	0.5622	PAMB.PAN2BR	0.24448	PAMB.P4	PAN2BR	P4
PAMB	LEAF	0.0339	PAMB.LEAF	-0.124786	PAMB.P4	LEAF	P4
PAMB	PANEXS	0.5212	PAMB.PANEXS	-0.0405297	PAMB.P4	PANEXS	P4
PAMB	CUHABIT	0.4568	PAMB.CUHABIT	-0.0905863	PAMB.P4	CUHABIT	P4
PAMB	CUHABIT_VEG	0.9042	PAMB.CUHABIT_VEG	-0.103978	PAMB.P4	CUHABIT_VEG	P4
PAMB	FLAGATT	0.3236	PAMB.FLAGATT	-0.0896169	PAMB.P4	FLAGATT	P4
PAMB	PANTYPE	0.768	PAMB.PANTYPE	0.103382	PAMB.P4	PANTYPE	P4
CUNO	FERT	0.9603	CUNO.FERT	-0.0724739	CUNO.P4	FERT	P4
CUNO	FLFLG	0.9117	CUNO.FLFLG	-0.115276	CUNO.P4	FLFLG	P4
CUNO	2LLT	0.2664	CUNO.2LLT	-0.212249	CUNO.P4	2LLT	P4
CUNO	ANTLT	0.0938	CUNO.ANTLT	-0.116835	CUNO.P4	ANTLT	P4
CUNO	LIGLT	0.024	CUNO.LIGLT	-0.275419	CUNO.P4	LIGLT	P4
CUNO	PANBASE	0.385	CUNO.PANBASE	-0.110622	CUNO.P4	PANBASE	P4
CUNO	UNFILLED	0.8306	CUNO.UNFILLED	0.0333048	CUNO.P4	UNFILLED	P4
CUNO	DTHD	0.0222	CUNO.DTHD	-0.344686	CUNO.P4	DTHD	P4
CUNO	CUDI	0.0031	CUNO.CUDI	-0.248278	CUNO.P4	CUDI	P4
CUNO	CULT	0.079	CUNO.CULT	0.000471841	CUNO.P4	CULT	P4
CUNO	DIST	0.0816	CUNO.DIST	-0.0868951	CUNO.P4	DIST	P4
CUNO	PNLG	0.5191	CUNO.PNLG	0.0163113	CUNO.P4	PNLG	P4
CUNO	FLFWD	0.794	CUNO.FLFWD	-0.0679388	CUNO.P4	FLFWD	P4
CUNO	2LWD	0.2927	CUNO.2LWD	-0.0906217	CUNO.P4	2LWD	P4
CUNO	SPKLT	0.123	CUNO.SPKLT	0.0541622	CUNO.P4	SPKLT	P4
CUNO	STLWD	0.428	CUNO.STLWD	-0.0645912	CUNO.P4	STLWD	P4
CUNO	SPKWD	0.3257	CUNO.SPKWD	-0.0536603	CUNO.P4	SPKWD	P4
CUNO	STLLT	0.1127	CUNO.STLLT	0.0678787	CUNO.P4	STLLT	P4
CUNO	STYLT	0.0897	CUNO.STYLT	0.133041	CUNO.P4	STYLT	P4
CUNO	AWNLT	0.0386	CUNO.AWNLT	-0.440589	CUNO.P4	AWNLT	P4
CUNO	AWNWD	0.1085	CUNO.AWNWD	-0.242118	CUNO.P4	AWNWD	P4
CUNO	STGLT	0.4588	CUNO.STGLT	-0.120876	CUNO.P4	STGLT	P4
CUNO	PAN2BR	0.0657	CUNO.PAN2BR	0.225932	CUNO.P4	PAN2BR	P4
CUNO	LEAF	0.5503	CUNO.LEAF	-0.216981	CUNO.P4	LEAF	P4
CUNO	PANEXS	0.0898	CUNO.PANEXS	-0.225154	CUNO.P4	PANEXS	P4
CUNO	CUHABIT	0.1292	CUNO.CUHABIT	-0.200132	CUNO.P4	CUHABIT	P4
CUNO	CUHABIT_VEG	0.3034	CUNO.CUHABIT_VEG	-0.145575	CUNO.P4	CUHABIT_VEG	P4
CUNO	FLAGATT	0.412	CUNO.FLAGATT	-0.110711	CUNO.P4	FLAGATT	P4
CUNO	PANTYPE	0.0889	CUNO.PANTYPE	-0.0485667	CUNO.P4	PANTYPE	P4
CUNO	PAMB	0.6068	CUNO.PAMB	0.145681	CUNO.P4	PAMB	P4
PNNB	FERT	0.752	PNNB.FERT	0.0521168	PNNB.P4	FERT	P4
PNNB	FLFLG	0.8333	PNNB.FLFLG	-0.216208	PNNB.P4	FLFLG	P4
PNNB	2LLT	0.5422	PNNB.2LLT	-0.259548	PNNB.P4	2LLT	P4
PNNB	ANTLT	0.0314	PNNB.ANTLT	-0.206862	PNNB.P4	ANTLT	P4
PNNB	LIGLT	0.3135	PNNB.LIGLT	-0.263267	PNNB.P4	LIGLT	P4
PNNB	PANBASE	0.7659	PNNB.PANBASE	-0.0807667	PNNB.P4	PANBASE	P4
PNNB	UNFILLED	0.2528	PNNB.UNFILLED	-0.160899	PNNB.P4	UNFILLED	P4
PNNB	DTHD	0.0129	PNNB.DTHD	-0.334947	PNNB.P4	DTHD	P4
PNNB	CUDI	0.0065	PNNB.CUDI	-0.265329	PNNB.P4	CUDI	P4
PNNB	CULT	0.2413	PNNB.CULT	-0.139444	PNNB.P4	CULT	P4
PNNB	DIST	0.1486	PNNB.DIST	-0.17738	PNNB.P4	DIST	P4
PNNB	PNLG	0.7975	PNNB.PNLG	-0.115234	PNNB.P4	PNLG	P4
PNNB	FLFWD	0.325	PNNB.FLFWD	-0.00260833	PNNB.P4	FLFWD	P4
PNNB	2LWD	0.1294	PNNB.2LWD	-0.0964758	PNNB.P4	2LWD	P4
PNNB	SPKLT	0.4184	PNNB.SPKLT	0.125996	PNNB.P4	SPKLT	P4
PNNB	STLWD	0.3157	PNNB.STLWD	-0.00253666	PNNB.P4	STLWD	P4
PNNB	SPKWD	0.0634	PNNB.SPKWD	0.0916608	PNNB.P4	SPKWD	P4
PNNB	STLLT	0.3566	PNNB.STLLT	0.178691	PNNB.P4	STLLT	P4
PNNB	STYLT	0.6923	PNNB.STYLT	0.0940611	PNNB.P4	STYLT	P4
PNNB	AWNLT	0.9938	PNNB.AWNLT	-0.356658	PNNB.P4	AWNLT	P4
PNNB	AWNWD	0.2913	PNNB.AWNWD	-0.093278	PNNB.P4	AWNWD	P4
PNNB	STGLT	0.5404	PNNB.STGLT	-0.155457	PNNB.P4	STGLT	P4
PNNB	PAN2BR	0.0195	PNNB.PAN2BR	0.352107	PNNB.P4	PAN2BR	P4
PNNB	LEAF	0.1852	PNNB.LEAF	-0.248212	PNNB.P4	LEAF	P4
PNNB	PANEXS	0.0646	PNNB.PANEXS	-0.351058	PNNB.P4	PANEXS	P4
PNNB	CUHABIT	0.0166	PNNB.CUHABIT	-0.405326	PNNB.P4	CUHABIT	P4
PNNB	CUHABIT_VEG	0.5773	PNNB.CUHABIT_VEG	-0.117964	PNNB.P4	CUHABIT_VEG	P4
PNNB	FLAGATT	0.2047	PNNB.FLAGATT	-0.240859	PNNB.P4	FLAGATT	P4
PNNB	PANTYPE	0.0042	PNNB.PANTYPE	-0.0514427	PNNB.P4	PANTYPE	P4
PNNB	PAMB	0.2308	PNNB.PAMB	0.245106	PNNB.P4	PAMB	P4
PNNB	CUNO	0.114	PNNB.CUNO	0.763906	PNNB.P4	CUNO	P4

## Sheet: DB_Correlation
x	y	p	Trait_Pair	correlation	i.x	i.y	Phenotypic group
HULGRCO	DTHD	0.0698	HULGRCO.DTHD	-0.51728	HULGRCO.P1	DTHD	P1
SDSH_BINARY	DTHD	0.6126	SDSH_BINARY.DTHD	0.0297	SDSH_BINARY.P1	DTHD	P1
SDSH_BINARY	HULGRCO	0.9809	SDSH_BINARY.HULGRCO	0.0515617	SDSH_BINARY.P1	HULGRCO	P1
HULGRVOL	DTHD	0.2849	HULGRVOL.DTHD	-0.184348	HULGRVOL.P1	DTHD	P1
HULGRVOL	HULGRCO	0.4383	HULGRVOL.HULGRCO	0.124016	HULGRVOL.P1	HULGRCO	P1
HULGRVOL	SDSH_BINARY	0.7969	HULGRVOL.SDSH_BINARY	-0.186961	HULGRVOL.P1	SDSH_BINARY	P1
HULGRWD	DTHD	0.5127	HULGRWD.DTHD	-0.152701	HULGRWD.P1	DTHD	P1
HULGRWD	HULGRCO	0.384	HULGRWD.HULGRCO	0.1772	HULGRWD.P1	HULGRCO	P1
HULGRWD	SDSH_BINARY	0.9825	HULGRWD.SDSH_BINARY	-0.142211	HULGRWD.P1	SDSH_BINARY	P1
HULGRWD	HULGRVOL	0.7861	HULGRWD.HULGRVOL	0.952914	HULGRWD.P1	HULGRVOL	P1
PTHT	DTHD	0.0209	PTHT.DTHD	0.364231	PTHT.P1	DTHD	P1
PTHT	HULGRCO	0.7259	PTHT.HULGRCO	-0.218465	PTHT.P1	HULGRCO	P1
PTHT	SDSH_BINARY	0.5979	PTHT.SDSH_BINARY	-0.122754	PTHT.P1	SDSH_BINARY	P1
PTHT	HULGRVOL	0.5459	PTHT.HULGRVOL	0.094546	PTHT.P1	HULGRVOL	P1
PTHT	HULGRWD	0.9019	PTHT.HULGRWD	0.0900461	PTHT.P1	HULGRWD	P1
UNFILGRNB	DTHD	0.7555	UNFILGRNB.DTHD	0.134848	UNFILGRNB.P1	DTHD	P1
UNFILGRNB	HULGRCO	0.6431	UNFILGRNB.HULGRCO	-0.0511769	UNFILGRNB.P1	HULGRCO	P1
UNFILGRNB	SDSH_BINARY	0.1752	UNFILGRNB.SDSH_BINARY	-0.0761753	UNFILGRNB.P1	SDSH_BINARY	P1
UNFILGRNB	HULGRVOL	0.4087	UNFILGRNB.HULGRVOL	-0.0834322	UNFILGRNB.P1	HULGRVOL	P1
UNFILGRNB	HULGRWD	0.3789	UNFILGRNB.HULGRWD	-0.0702554	UNFILGRNB.P1	HULGRWD	P1
UNFILGRNB	PTHT	0.0555	UNFILGRNB.PTHT	0.524763	UNFILGRNB.P1	PTHT	P1
PBRNB	DTHD	0.0462	PBRNB.DTHD	-0.144478	PBRNB.P1	DTHD	P1
PBRNB	HULGRCO	0.7566	PBRNB.HULGRCO	0.364041	PBRNB.P1	HULGRCO	P1
PBRNB	SDSH_BINARY	0.8759	PBRNB.SDSH_BINARY	0.00803951	PBRNB.P1	SDSH_BINARY	P1
PBRNB	HULGRVOL	0.1918	PBRNB.HULGRVOL	0.0415261	PBRNB.P1	HULGRVOL	P1
PBRNB	HULGRWD	0.1821	PBRNB.HULGRWD	0.054314	PBRNB.P1	HULGRWD	P1
PBRNB	PTHT	0.0046	PBRNB.PTHT	0.444235	PBRNB.P1	PTHT	P1
PBRNB	UNFILGRNB	0.1122	PBRNB.UNFILGRNB	0.715607	PBRNB.P1	UNFILGRNB	P1
PNLG	DTHD	0.1955	PNLG.DTHD	0.146932	PNLG.P1	DTHD	P1
PNLG	HULGRCO	0.6033	PNLG.HULGRCO	-0.0547316	PNLG.P1	HULGRCO	P1
PNLG	SDSH_BINARY	0.3141	PNLG.SDSH_BINARY	0.119527	PNLG.P1	SDSH_BINARY	P1
PNLG	HULGRVOL	0.1149	PNLG.HULGRVOL	-0.0515605	PNLG.P1	HULGRVOL	P1
PNLG	HULGRWD	0.1296	PNLG.HULGRWD	-0.126364	PNLG.P1	HULGRWD	P1
PNLG	PTHT	0.1751	PNLG.PTHT	0.671087	PNLG.P1	PTHT	P1
PNLG	UNFILGRNB	0.3369	PNLG.UNFILGRNB	0.605284	PNLG.P1	UNFILGRNB	P1
PNLG	PBRNB	0.0365	PNLG.PBRNB	0.737246	PNLG.P1	PBRNB	P1
FLFLWD	DTHD	0.8161	FLFLWD.DTHD	-0.153325	FLFLWD.P1	DTHD	P1
FLFLWD	HULGRCO	0.1435	FLFLWD.HULGRCO	0.0208638	FLFLWD.P1	HULGRCO	P1
FLFLWD	SDSH_BINARY	0.7571	FLFLWD.SDSH_BINARY	0.0476115	FLFLWD.P1	SDSH_BINARY	P1
FLFLWD	HULGRVOL	0.7936	FLFLWD.HULGRVOL	0.263807	FLFLWD.P1	HULGRVOL	P1
FLFLWD	HULGRWD	0.7145	FLFLWD.HULGRWD	0.212052	FLFLWD.P1	HULGRWD	P1
FLFLWD	PTHT	0.9859	FLFLWD.PTHT	0.00527884	FLFLWD.P1	PTHT	P1
FLFLWD	UNFILGRNB	0.5688	FLFLWD.UNFILGRNB	0.35904	FLFLWD.P1	UNFILGRNB	P1
FLFLWD	PBRNB	0.0753	FLFLWD.PBRNB	0.443887	FLFLWD.P1	PBRNB	P1
FLFLWD	PNLG	0.3306	FLFLWD.PNLG	0.300464	FLFLWD.P1	PNLG	P1
FLFLG	DTHD	0.8046	FLFLG.DTHD	-0.193123	FLFLG.P1	DTHD	P1
FLFLG	HULGRCO	0.3252	FLFLG.HULGRCO	0.131676	FLFLG.P1	HULGRCO	P1
FLFLG	SDSH_BINARY	0.9614	FLFLG.SDSH_BINARY	0.120113	FLFLG.P1	SDSH_BINARY	P1
FLFLG	HULGRVOL	0.0385	FLFLG.HULGRVOL	-0.00287658	FLFLG.P1	HULGRVOL	P1
FLFLG	HULGRWD	0.0086	FLFLG.HULGRWD	-0.131487	FLFLG.P1	HULGRWD	P1
FLFLG	PTHT	0.6074	FLFLG.PTHT	0.0702867	FLFLG.P1	PTHT	P1
FLFLG	UNFILGRNB	0.3114	FLFLG.UNFILGRNB	0.202763	FLFLG.P1	UNFILGRNB	P1
FLFLG	PBRNB	0.4338	FLFLG.PBRNB	0.398284	FLFLG.P1	PBRNB	P1
FLFLG	PNLG	0.405	FLFLG.PNLG	0.554513	FLFLG.P1	PNLG	P1
FLFLG	FLFLWD	0.7785	FLFLG.FLFLWD	0.39481	FLFLG.P1	FLFLWD	P1
HULGRLG	DTHD	0.232	HULGRLG.DTHD	-0.154448	HULGRLG.P1	DTHD	P1
HULGRLG	HULGRCO	0.392	HULGRLG.HULGRCO	-0.0236207	HULGRLG.P1	HULGRCO	P1
HULGRLG	SDSH_BINARY	0.0462	HULGRLG.SDSH_BINARY	-0.0430911	HULGRLG.P1	SDSH_BINARY	P1
HULGRLG	HULGRVOL	0.3138	HULGRLG.HULGRVOL	0.390941	HULGRLG.P1	HULGRVOL	P1
HULGRLG	HULGRWD	0.4414	HULGRLG.HULGRWD	0.118799	HULGRLG.P1	HULGRWD	P1
HULGRLG	PTHT	0.5358	HULGRLG.PTHT	-0.114924	HULGRLG.P1	PTHT	P1
HULGRLG	UNFILGRNB	0.4138	HULGRLG.UNFILGRNB	-0.0940052	HULGRLG.P1	UNFILGRNB	P1
HULGRLG	PBRNB	0.637	HULGRLG.PBRNB	-0.0429867	HULGRLG.P1	PBRNB	P1
HULGRLG	PNLG	0.2269	HULGRLG.PNLG	0.140894	HULGRLG.P1	PNLG	P1
HULGRLG	FLFLWD	0.225	HULGRLG.FLFLWD	0.248007	HULGRLG.P1	FLFLWD	P1
HULGRLG	FLFLG	0.2555	HULGRLG.FLFLG	0.485694	HULGRLG.P1	FLFLG	P1
CULM_ANGLE	DTHD	0.3524	CULM_ANGLE.DTHD	-0.065282	CULM_ANGLE.P1	DTHD	P1
CULM_ANGLE	HULGRCO	0.8107	CULM_ANGLE.HULGRCO	-0.0657884	CULM_ANGLE.P1	HULGRCO	P1
CULM_ANGLE	SDSH_BINARY	0.5664	CULM_ANGLE.SDSH_BINARY	-0.0710025	CULM_ANGLE.P1	SDSH_BINARY	P1
CULM_ANGLE	HULGRVOL	0.168	CULM_ANGLE.HULGRVOL	0.314302	CULM_ANGLE.P1	HULGRVOL	P1
CULM_ANGLE	HULGRWD	0.2696	CULM_ANGLE.HULGRWD	0.208826	CULM_ANGLE.P1	HULGRWD	P1
CULM_ANGLE	PTHT	0.219	CULM_ANGLE.PTHT	0.194853	CULM_ANGLE.P1	PTHT	P1
CULM_ANGLE	UNFILGRNB	0.9821	CULM_ANGLE.UNFILGRNB	-0.313516	CULM_ANGLE.P1	UNFILGRNB	P1
CULM_ANGLE	PBRNB	0.8712	CULM_ANGLE.PBRNB	-0.302465	CULM_ANGLE.P1	PBRNB	P1
CULM_ANGLE	PNLG	0.352	CULM_ANGLE.PNLG	-0.0567427	CULM_ANGLE.P1	PNLG	P1
CULM_ANGLE	FLFLWD	0.2342	CULM_ANGLE.FLFLWD	-0.187031	CULM_ANGLE.P1	FLFLWD	P1
CULM_ANGLE	FLFLG	0.3623	CULM_ANGLE.FLFLG	0.0486587	CULM_ANGLE.P1	FLFLG	P1
CULM_ANGLE	HULGRLG	0.292	CULM_ANGLE.HULGRLG	0.348523	CULM_ANGLE.P1	HULGRLG	P1
STOLON_BINARY	DTHD	0.9397	STOLON_BINARY.DTHD	0.0269275	STOLON_BINARY.P1	DTHD	P1
STOLON_BINARY	HULGRCO	0.3964	STOLON_BINARY.HULGRCO	-0.0828244	STOLON_BINARY.P1	HULGRCO	P1
STOLON_BINARY	SDSH_BINARY	0.9519	STOLON_BINARY.SDSH_BINARY	-0.0728379	STOLON_BINARY.P1	SDSH_BINARY	P1
STOLON_BINARY	HULGRVOL	0.3946	STOLON_BINARY.HULGRVOL	0.239331	STOLON_BINARY.P1	HULGRVOL	P1
STOLON_BINARY	HULGRWD	0.7195	STOLON_BINARY.HULGRWD	0.112311	STOLON_BINARY.P1	HULGRWD	P1
STOLON_BINARY	PTHT	0.0475	STOLON_BINARY.PTHT	0.0290505	STOLON_BINARY.P1	PTHT	P1
STOLON_BINARY	UNFILGRNB	0.8378	STOLON_BINARY.UNFILGRNB	-0.141415	STOLON_BINARY.P1	UNFILGRNB	P1
STOLON_BINARY	PBRNB	0.3185	STOLON_BINARY.PBRNB	-0.303498	STOLON_BINARY.P1	PBRNB	P1
STOLON_BINARY	PNLG	0.7551	STOLON_BINARY.PNLG	-0.153943	STOLON_BINARY.P1	PNLG	P1
STOLON_BINARY	FLFLWD	0.5379	STOLON_BINARY.FLFLWD	-0.281941	STOLON_BINARY.P1	FLFLWD	P1
STOLON_BINARY	FLFLG	0.1911	STOLON_BINARY.FLFLG	0.0463393	STOLON_BINARY.P1	FLFLG	P1
STOLON_BINARY	HULGRLG	0.203	STOLON_BINARY.HULGRLG	0.437692	STOLON_BINARY.P1	HULGRLG	P1
STOLON_BINARY	CULM_ANGLE	0.0061	STOLON_BINARY.CULM_ANGLE	0.67631	STOLON_BINARY.P1	CULM_ANGLE	P1
PNNB	DTHD	0.3742	PNNB.DTHD	-0.336075	PNNB.P1	DTHD	P1
PNNB	HULGRCO	0.0825	PNNB.HULGRCO	0.093123	PNNB.P1	HULGRCO	P1
PNNB	SDSH_BINARY	0.7532	PNNB.SDSH_BINARY	0.170089	PNNB.P1	SDSH_BINARY	P1
PNNB	HULGRVOL	0.8543	PNNB.HULGRVOL	-0.322228	PNNB.P1	HULGRVOL	P1
PNNB	HULGRWD	0.6709	PNNB.HULGRWD	-0.313186	PNNB.P1	HULGRWD	P1
PNNB	PTHT	0.5381	PNNB.PTHT	-0.416128	PNNB.P1	PTHT	P1
PNNB	UNFILGRNB	0.1122	PNNB.UNFILGRNB	-0.456668	PNNB.P1	UNFILGRNB	P1
PNNB	PBRNB	0.0701	PNNB.PBRNB	-0.292194	PNNB.P1	PBRNB	P1
PNNB	PNLG	0.2333	PNNB.PNLG	-0.33153	PNNB.P1	PNLG	P1
PNNB	FLFLWD	0.5431	PNNB.FLFLWD	-0.515535	PNNB.P1	FLFLWD	P1
PNNB	FLFLG	0.1501	PNNB.FLFLG	-0.130341	PNNB.P1	FLFLG	P1
PNNB	HULGRLG	0.1851	PNNB.HULGRLG	-0.0937791	PNNB.P1	HULGRLG	P1
PNNB	CULM_ANGLE	0.904	PNNB.CULM_ANGLE	0.114355	PNNB.P1	CULM_ANGLE	P1
PNNB	STOLON_BINARY	0.1786	PNNB.STOLON_BINARY	0.120074	PNNB.P1	STOLON_BINARY	P1
AWN_BINARY	DTHD	0.6751	AWN_BINARY.DTHD	0.194734	AWN_BINARY.P1	DTHD	P1
AWN_BINARY	HULGRCO	0.5758	AWN_BINARY.HULGRCO	-0.284008	AWN_BINARY.P1	HULGRCO	P1
AWN_BINARY	SDSH_BINARY	0.6255	AWN_BINARY.SDSH_BINARY	0.0673944	AWN_BINARY.P1	SDSH_BINARY	P1
AWN_BINARY	HULGRVOL	0.2406	AWN_BINARY.HULGRVOL	-0.158611	AWN_BINARY.P1	HULGRVOL	P1
AWN_BINARY	HULGRWD	0.3497	AWN_BINARY.HULGRWD	-0.137172	AWN_BINARY.P1	HULGRWD	P1
AWN_BINARY	PTHT	0.7322	AWN_BINARY.PTHT	0.00235126	AWN_BINARY.P1	PTHT	P1
AWN_BINARY	UNFILGRNB	0.6033	AWN_BINARY.UNFILGRNB	-0.222017	AWN_BINARY.P1	UNFILGRNB	P1
AWN_BINARY	PBRNB	0.5322	AWN_BINARY.PBRNB	-0.249714	AWN_BINARY.P1	PBRNB	P1
AWN_BINARY	PNLG	0.5419	AWN_BINARY.PNLG	-0.153662	AWN_BINARY.P1	PNLG	P1
AWN_BINARY	FLFLWD	0.8407	AWN_BINARY.FLFLWD	-0.210218	AWN_BINARY.P1	FLFLWD	P1
AWN_BINARY	FLFLG	0.1634	AWN_BINARY.FLFLG	-0.117012	AWN_BINARY.P1	FLFLG	P1
AWN_BINARY	HULGRLG	0.2313	AWN_BINARY.HULGRLG	-0.145786	AWN_BINARY.P1	HULGRLG	P1
AWN_BINARY	CULM_ANGLE	0.8174	AWN_BINARY.CULM_ANGLE	0.0857931	AWN_BINARY.P1	CULM_ANGLE	P1
AWN_BINARY	STOLON_BINARY	0.0389	AWN_BINARY.STOLON_BINARY	0.0882225	AWN_BINARY.P1	STOLON_BINARY	P1
AWN_BINARY	PNNB	0.0206	AWN_BINARY.PNNB	0.366012	AWN_BINARY.P1	PNNB	P1
AWNPLU	DTHD	0.7738	AWNPLU.DTHD	-0.0175601	AWNPLU.P1	DTHD	P1
AWNPLU	HULGRCO	0.0105	AWNPLU.HULGRCO	-0.274848	AWNPLU.P1	HULGRCO	P1
AWNPLU	SDSH_BINARY	0.7377	AWNPLU.SDSH_BINARY	0.0619539	AWNPLU.P1	SDSH_BINARY	P1
AWNPLU	HULGRVOL	0.3613	AWNPLU.HULGRVOL	-0.132449	AWNPLU.P1	HULGRVOL	P1
AWNPLU	HULGRWD	0.3092	AWNPLU.HULGRWD	-0.148909	AWNPLU.P1	HULGRWD	P1
AWNPLU	PTHT	0.054	AWNPLU.PTHT	0.0715184	AWNPLU.P1	PTHT	P1
AWNPLU	UNFILGRNB	0.1585	AWNPLU.UNFILGRNB	-0.326289	AWNPLU.P1	UNFILGRNB	P1
AWNPLU	PBRNB	0.3099	AWNPLU.PBRNB	-0.190425	AWNPLU.P1	PBRNB	P1
AWNPLU	PNLG	0.2445	AWNPLU.PNLG	-0.074774	AWNPLU.P1	PNLG	P1
AWNPLU	FLFLWD	0.7497	AWNPLU.FLFLWD	-0.197921	AWNPLU.P1	FLFLWD	P1
AWNPLU	FLFLG	0.5843	AWNPLU.FLFLG	0.0218675	AWNPLU.P1	FLFLG	P1
AWNPLU	HULGRLG	0.3938	AWNPLU.HULGRLG	-0.0401679	AWNPLU.P1	HULGRLG	P1
AWNPLU	CULM_ANGLE	0.6596	AWNPLU.CULM_ANGLE	0.260924	AWNPLU.P1	CULM_ANGLE	P1
AWNPLU	STOLON_BINARY	0.9146	AWNPLU.STOLON_BINARY	0.132902	AWNPLU.P1	STOLON_BINARY	P1
AWNPLU	PNNB	0.1778	AWNPLU.PNNB	0.427149	AWNPLU.P1	PNNB	P1
AWNPLU	AWN_BINARY	0.1132	AWNPLU.AWN_BINARY	0.781484	AWNPLU.P1	AWN_BINARY	P1
		1	DTHD.DTHD	0	DTHD.P2/P3	DTHD	P2/P3
HULGRCO	DTHD	0.0698	HULGRCO.DTHD	0.0165889	HULGRCO.P2/P3	DTHD	P2/P3
		1	HULGRCO.HULGRCO	0	HULGRCO.P2/P3	HULGRCO	P2/P3
SDSH_BINARY	DTHD	0.6126	SDSH_BINARY.DTHD	-0.256814	SDSH_BINARY.P2/P3	DTHD	P2/P3
SDSH_BINARY	HULGRCO	0.9809	SDSH_BINARY.HULGRCO	0.0936972	SDSH_BINARY.P2/P3	HULGRCO	P2/P3
		1	SDSH_BINARY.SDSH_BINARY	0	SDSH_BINARY.P2/P3	SDSH_BINARY	P2/P3
HULGRVOL	DTHD	0.2849	HULGRVOL.DTHD	0.152139	HULGRVOL.P2/P3	DTHD	P2/P3
HULGRVOL	HULGRCO	0.4383	HULGRVOL.HULGRCO	0.172447	HULGRVOL.P2/P3	HULGRCO	P2/P3
HULGRVOL	SDSH_BINARY	0.7969	HULGRVOL.SDSH_BINARY	-0.307192	HULGRVOL.P2/P3	SDSH_BINARY	P2/P3
		1	HULGRVOL.HULGRVOL	0	HULGRVOL.P2/P3	HULGRVOL	P2/P3
HULGRWD	DTHD	0.5127	HULGRWD.DTHD	0.149036	HULGRWD.P2/P3	DTHD	P2/P3
HULGRWD	HULGRCO	0.384	HULGRWD.HULGRCO	0.279659	HULGRWD.P2/P3	HULGRCO	P2/P3
HULGRWD	SDSH_BINARY	0.9825	HULGRWD.SDSH_BINARY	-0.213137	HULGRWD.P2/P3	SDSH_BINARY	P2/P3
HULGRWD	HULGRVOL	0.7861	HULGRWD.HULGRVOL	0.963534	HULGRWD.P2/P3	HULGRVOL	P2/P3
		1	HULGRWD.HULGRWD	0	HULGRWD.P2/P3	HULGRWD	P2/P3
PTHT	DTHD	0.0209	PTHT.DTHD	-0.149704	PTHT.P2/P3	DTHD	P2/P3
PTHT	HULGRCO	0.7259	PTHT.HULGRCO	-0.138938	PTHT.P2/P3	HULGRCO	P2/P3
PTHT	SDSH_BINARY	0.5979	PTHT.SDSH_BINARY	-0.123031	PTHT.P2/P3	SDSH_BINARY	P2/P3
PTHT	HULGRVOL	0.5459	PTHT.HULGRVOL	0.216963	PTHT.P2/P3	HULGRVOL	P2/P3
PTHT	HULGRWD	0.9019	PTHT.HULGRWD	0.15031	PTHT.P2/P3	HULGRWD	P2/P3
		1	PTHT.PTHT	0	PTHT.P2/P3	PTHT	P2/P3
UNFILGRNB	DTHD	0.7555	UNFILGRNB.DTHD	0.115081	UNFILGRNB.P2/P3	DTHD	P2/P3
UNFILGRNB	HULGRCO	0.6431	UNFILGRNB.HULGRCO	-0.204752	UNFILGRNB.P2/P3	HULGRCO	P2/P3
UNFILGRNB	SDSH_BINARY	0.1752	UNFILGRNB.SDSH_BINARY	0.0140907	UNFILGRNB.P2/P3	SDSH_BINARY	P2/P3
UNFILGRNB	HULGRVOL	0.4087	UNFILGRNB.HULGRVOL	-0.152873	UNFILGRNB.P2/P3	HULGRVOL	P2/P3
UNFILGRNB	HULGRWD	0.3789	UNFILGRNB.HULGRWD	-0.185151	UNFILGRNB.P2/P3	HULGRWD	P2/P3
UNFILGRNB	PTHT	0.0555	UNFILGRNB.PTHT	0.251131	UNFILGRNB.P2/P3	PTHT	P2/P3
		1	UNFILGRNB.UNFILGRNB	0	UNFILGRNB.P2/P3	UNFILGRNB	P2/P3
PBRNB	DTHD	0.0462	PBRNB.DTHD	-0.0208789	PBRNB.P2/P3	DTHD	P2/P3
PBRNB	HULGRCO	0.7566	PBRNB.HULGRCO	0.346457	PBRNB.P2/P3	HULGRCO	P2/P3
PBRNB	SDSH_BINARY	0.8759	PBRNB.SDSH_BINARY	-0.0187646	PBRNB.P2/P3	SDSH_BINARY	P2/P3
PBRNB	HULGRVOL	0.1918	PBRNB.HULGRVOL	0.272169	PBRNB.P2/P3	HULGRVOL	P2/P3
PBRNB	HULGRWD	0.1821	PBRNB.HULGRWD	0.363946	PBRNB.P2/P3	HULGRWD	P2/P3
PBRNB	PTHT	0.0046	PBRNB.PTHT	0.0453909	PBRNB.P2/P3	PTHT	P2/P3
PBRNB	UNFILGRNB	0.1122	PBRNB.UNFILGRNB	0.445573	PBRNB.P2/P3	UNFILGRNB	P2/P3
		1	PBRNB.PBRNB	0	PBRNB.P2/P3	PBRNB	P2/P3
PNLG	DTHD	0.1955	PNLG.DTHD	-0.011866	PNLG.P2/P3	DTHD	P2/P3
PNLG	HULGRCO	0.6033	PNLG.HULGRCO	0.140351	PNLG.P2/P3	HULGRCO	P2/P3
PNLG	SDSH_BINARY	0.3141	PNLG.SDSH_BINARY	-0.0778219	PNLG.P2/P3	SDSH_BINARY	P2/P3
PNLG	HULGRVOL	0.1149	PNLG.HULGRVOL	0.437235	PNLG.P2/P3	HULGRVOL	P2/P3
PNLG	HULGRWD	0.1296	PNLG.HULGRWD	0.398382	PNLG.P2/P3	HULGRWD	P2/P3
PNLG	PTHT	0.1751	PNLG.PTHT	0.437769	PNLG.P2/P3	PTHT	P2/P3
PNLG	UNFILGRNB	0.3369	PNLG.UNFILGRNB	0.466474	PNLG.P2/P3	UNFILGRNB	P2/P3
PNLG	PBRNB	0.0365	PNLG.PBRNB	0.662641	PNLG.P2/P3	PBRNB	P2/P3
		1	PNLG.PNLG	0	PNLG.P2/P3	PNLG	P2/P3
FLFLWD	DTHD	0.8161	FLFLWD.DTHD	-0.239111	FLFLWD.P2/P3	DTHD	P2/P3
FLFLWD	HULGRCO	0.1435	FLFLWD.HULGRCO	0.26249	FLFLWD.P2/P3	HULGRCO	P2/P3
FLFLWD	SDSH_BINARY	0.7571	FLFLWD.SDSH_BINARY	0.302113	FLFLWD.P2/P3	SDSH_BINARY	P2/P3
FLFLWD	HULGRVOL	0.7936	FLFLWD.HULGRVOL	0.273241	FLFLWD.P2/P3	HULGRVOL	P2/P3
FLFLWD	HULGRWD	0.7145	FLFLWD.HULGRWD	0.365824	FLFLWD.P2/P3	HULGRWD	P2/P3
FLFLWD	PTHT	0.9859	FLFLWD.PTHT	0.0125877	FLFLWD.P2/P3	PTHT	P2/P3
FLFLWD	UNFILGRNB	0.5688	FLFLWD.UNFILGRNB	0.128148	FLFLWD.P2/P3	UNFILGRNB	P2/P3
FLFLWD	PBRNB	0.0753	FLFLWD.PBRNB	0.691108	FLFLWD.P2/P3	PBRNB	P2/P3
FLFLWD	PNLG	0.3306	FLFLWD.PNLG	0.513021	FLFLWD.P2/P3	PNLG	P2/P3
		1	FLFLWD.FLFLWD	0	FLFLWD.P2/P3	FLFLWD	P2/P3
FLFLG	DTHD	0.8046	FLFLG.DTHD	-0.128649	FLFLG.P2/P3	DTHD	P2/P3
FLFLG	HULGRCO	0.3252	FLFLG.HULGRCO	0.312045	FLFLG.P2/P3	HULGRCO	P2/P3
FLFLG	SDSH_BINARY	0.9614	FLFLG.SDSH_BINARY	0.00990546	FLFLG.P2/P3	SDSH_BINARY	P2/P3
FLFLG	HULGRVOL	0.0385	FLFLG.HULGRVOL	0.628416	FLFLG.P2/P3	HULGRVOL	P2/P3
FLFLG	HULGRWD	0.0086	FLFLG.HULGRWD	0.633942	FLFLG.P2/P3	HULGRWD	P2/P3
FLFLG	PTHT	0.6074	FLFLG.PTHT	0.285537	FLFLG.P2/P3	PTHT	P2/P3
FLFLG	UNFILGRNB	0.3114	FLFLG.UNFILGRNB	0.0701583	FLFLG.P2/P3	UNFILGRNB	P2/P3
FLFLG	PBRNB	0.4338	FLFLG.PBRNB	0.536421	FLFLG.P2/P3	PBRNB	P2/P3
FLFLG	PNLG	0.405	FLFLG.PNLG	0.683087	FLFLG.P2/P3	PNLG	P2/P3
FLFLG	FLFLWD	0.7785	FLFLG.FLFLWD	0.508096	FLFLG.P2/P3	FLFLWD	P2/P3
		1	FLFLG.FLFLG	0	FLFLG.P2/P3	FLFLG	P2/P3
HULGRLG	DTHD	0.232	HULGRLG.DTHD	0.0256924	HULGRLG.P2/P3	DTHD	P2/P3
HULGRLG	HULGRCO	0.392	HULGRLG.HULGRCO	-0.287318	HULGRLG.P2/P3	HULGRCO	P2/P3
HULGRLG	SDSH_BINARY	0.0462	HULGRLG.SDSH_BINARY	-0.329042	HULGRLG.P2/P3	SDSH_BINARY	P2/P3
HULGRLG	HULGRVOL	0.3138	HULGRLG.HULGRVOL	0.236801	HULGRLG.P2/P3	HULGRVOL	P2/P3
HULGRLG	HULGRWD	0.4414	HULGRLG.HULGRWD	-0.00959289	HULGRLG.P2/P3	HULGRWD	P2/P3
HULGRLG	PTHT	0.5358	HULGRLG.PTHT	0.146471	HULGRLG.P2/P3	PTHT	P2/P3
HULGRLG	UNFILGRNB	0.4138	HULGRLG.UNFILGRNB	0.198167	HULGRLG.P2/P3	UNFILGRNB	P2/P3
HULGRLG	PBRNB	0.637	HULGRLG.PBRNB	-0.11592	HULGRLG.P2/P3	PBRNB	P2/P3
HULGRLG	PNLG	0.2269	HULGRLG.PNLG	0.27883	HULGRLG.P2/P3	PNLG	P2/P3
HULGRLG	FLFLWD	0.225	HULGRLG.FLFLWD	-0.092947	HULGRLG.P2/P3	FLFLWD	P2/P3
HULGRLG	FLFLG	0.2555	HULGRLG.FLFLG	0.0782183	HULGRLG.P2/P3	FLFLG	P2/P3
		1	HULGRLG.HULGRLG	0	HULGRLG.P2/P3	HULGRLG	P2/P3
CULM_ANGLE	DTHD	0.3524	CULM_ANGLE.DTHD	-0.405967	CULM_ANGLE.P2/P3	DTHD	P2/P3
CULM_ANGLE	HULGRCO	0.8107	CULM_ANGLE.HULGRCO	-0.161421	CULM_ANGLE.P2/P3	HULGRCO	P2/P3
CULM_ANGLE	SDSH_BINARY	0.5664	CULM_ANGLE.SDSH_BINARY	0.308573	CULM_ANGLE.P2/P3	SDSH_BINARY	P2/P3
CULM_ANGLE	HULGRVOL	0.168	CULM_ANGLE.HULGRVOL	-0.226499	CULM_ANGLE.P2/P3	HULGRVOL	P2/P3
CULM_ANGLE	HULGRWD	0.2696	CULM_ANGLE.HULGRWD	-0.245399	CULM_ANGLE.P2/P3	HULGRWD	P2/P3
CULM_ANGLE	PTHT	0.219	CULM_ANGLE.PTHT	0.0804205	CULM_ANGLE.P2/P3	PTHT	P2/P3
CULM_ANGLE	UNFILGRNB	0.9821	CULM_ANGLE.UNFILGRNB	-0.276892	CULM_ANGLE.P2/P3	UNFILGRNB	P2/P3
CULM_ANGLE	PBRNB	0.8712	CULM_ANGLE.PBRNB	-0.227237	CULM_ANGLE.P2/P3	PBRNB	P2/P3
CULM_ANGLE	PNLG	0.352	CULM_ANGLE.PNLG	-0.0166478	CULM_ANGLE.P2/P3	PNLG	P2/P3
CULM_ANGLE	FLFLWD	0.2342	CULM_ANGLE.FLFLWD	0.189935	CULM_ANGLE.P2/P3	FLFLWD	P2/P3
CULM_ANGLE	FLFLG	0.3623	CULM_ANGLE.FLFLG	-0.0341049	CULM_ANGLE.P2/P3	FLFLG	P2/P3
CULM_ANGLE	HULGRLG	0.292	CULM_ANGLE.HULGRLG	0.0130707	CULM_ANGLE.P2/P3	HULGRLG	P2/P3
		1	CULM_ANGLE.CULM_ANGLE	0	CULM_ANGLE.P2/P3	CULM_ANGLE	P2/P3
STOLON_BINARY	DTHD	0.9397	STOLON_BINARY.DTHD	0.11885	STOLON_BINARY.P2/P3	DTHD	P2/P3
STOLON_BINARY	HULGRCO	0.3964	STOLON_BINARY.HULGRCO	-0.184049	STOLON_BINARY.P2/P3	HULGRCO	P2/P3
STOLON_BINARY	SDSH_BINARY	0.9519	STOLON_BINARY.SDSH_BINARY	0.0321254	STOLON_BINARY.P2/P3	SDSH_BINARY	P2/P3
STOLON_BINARY	HULGRVOL	0.3946	STOLON_BINARY.HULGRVOL	0.108972	STOLON_BINARY.P2/P3	HULGRVOL	P2/P3
STOLON_BINARY	HULGRWD	0.7195	STOLON_BINARY.HULGRWD	0.0602908	STOLON_BINARY.P2/P3	HULGRWD	P2/P3
STOLON_BINARY	PTHT	0.0475	STOLON_BINARY.PTHT	0.566127	STOLON_BINARY.P2/P3	PTHT	P2/P3
STOLON_BINARY	UNFILGRNB	0.8378	STOLON_BINARY.UNFILGRNB	-0.00839412	STOLON_BINARY.P2/P3	UNFILGRNB	P2/P3
STOLON_BINARY	PBRNB	0.3185	STOLON_BINARY.PBRNB	-0.205755	STOLON_BINARY.P2/P3	PBRNB	P2/P3
STOLON_BINARY	PNLG	0.7551	STOLON_BINARY.PNLG	0.0490775	STOLON_BINARY.P2/P3	PNLG	P2/P3
STOLON_BINARY	FLFLWD	0.5379	STOLON_BINARY.FLFLWD	-0.0294604	STOLON_BINARY.P2/P3	FLFLWD	P2/P3
STOLON_BINARY	FLFLG	0.1911	STOLON_BINARY.FLFLG	0.190416	STOLON_BINARY.P2/P3	FLFLG	P2/P3
STOLON_BINARY	HULGRLG	0.203	STOLON_BINARY.HULGRLG	0.0919329	STOLON_BINARY.P2/P3	HULGRLG	P2/P3
STOLON_BINARY	CULM_ANGLE	0.0061	STOLON_BINARY.CULM_ANGLE	0.0513833	STOLON_BINARY.P2/P3	CULM_ANGLE	P2/P3
		1	STOLON_BINARY.STOLON_BINARY	0	STOLON_BINARY.P2/P3	STOLON_BINARY	P2/P3
PNNB	DTHD	0.3742	PNNB.DTHD	-0.0778124	PNNB.P2/P3	DTHD	P2/P3
PNNB	HULGRCO	0.0825	PNNB.HULGRCO	-0.220441	PNNB.P2/P3	HULGRCO	P2/P3
PNNB	SDSH_BINARY	0.7532	PNNB.SDSH_BINARY	0.0618644	PNNB.P2/P3	SDSH_BINARY	P2/P3
PNNB	HULGRVOL	0.8543	PNNB.HULGRVOL	-0.43549	PNNB.P2/P3	HULGRVOL	P2/P3
PNNB	HULGRWD	0.6709	PNNB.HULGRWD	-0.503201	PNNB.P2/P3	HULGRWD	P2/P3
PNNB	PTHT	0.5381	PNNB.PTHT	-0.417705	PNNB.P2/P3	PTHT	P2/P3
PNNB	UNFILGRNB	0.1122	PNNB.UNFILGRNB	-0.150274	PNNB.P2/P3	UNFILGRNB	P2/P3
PNNB	PBRNB	0.0701	PNNB.PBRNB	-0.638219	PNNB.P2/P3	PBRNB	P2/P3
PNNB	PNLG	0.2333	PNNB.PNLG	-0.556238	PNNB.P2/P3	PNLG	P2/P3
PNNB	FLFLWD	0.5431	PNNB.FLFLWD	-0.704559	PNNB.P2/P3	FLFLWD	P2/P3
PNNB	FLFLG	0.1501	PNNB.FLFLG	-0.50516	PNNB.P2/P3	FLFLG	P2/P3
PNNB	HULGRLG	0.1851	PNNB.HULGRLG	0.145008	PNNB.P2/P3	HULGRLG	P2/P3
PNNB	CULM_ANGLE	0.904	PNNB.CULM_ANGLE	0.0867813	PNNB.P2/P3	CULM_ANGLE	P2/P3
PNNB	STOLON_BINARY	0.1786	PNNB.STOLON_BINARY	-0.224668	PNNB.P2/P3	STOLON_BINARY	P2/P3
		1	PNNB.PNNB	0	PNNB.P2/P3	PNNB	P2/P3
AWN_BINARY	DTHD	0.6751	AWN_BINARY.DTHD	0.0126906	AWN_BINARY.P2/P3	DTHD	P2/P3
AWN_BINARY	HULGRCO	0.5758	AWN_BINARY.HULGRCO	-0.17638	AWN_BINARY.P2/P3	HULGRCO	P2/P3
AWN_BINARY	SDSH_BINARY	0.6255	AWN_BINARY.SDSH_BINARY	-0.155814	AWN_BINARY.P2/P3	SDSH_BINARY	P2/P3
AWN_BINARY	HULGRVOL	0.2406	AWN_BINARY.HULGRVOL	0.101684	AWN_BINARY.P2/P3	HULGRVOL	P2/P3
AWN_BINARY	HULGRWD	0.3497	AWN_BINARY.HULGRWD	0.0250867	AWN_BINARY.P2/P3	HULGRWD	P2/P3
AWN_BINARY	PTHT	0.7322	AWN_BINARY.PTHT	0.0395955	AWN_BINARY.P2/P3	PTHT	P2/P3
AWN_BINARY	UNFILGRNB	0.6033	AWN_BINARY.UNFILGRNB	-0.129945	AWN_BINARY.P2/P3	UNFILGRNB	P2/P3
AWN_BINARY	PBRNB	0.5322	AWN_BINARY.PBRNB	-0.00477846	AWN_BINARY.P2/P3	PBRNB	P2/P3
AWN_BINARY	PNLG	0.5419	AWN_BINARY.PNLG	0.0678004	AWN_BINARY.P2/P3	PNLG	P2/P3
AWN_BINARY	FLFLWD	0.8407	AWN_BINARY.FLFLWD	-0.065818	AWN_BINARY.P2/P3	FLFLWD	P2/P3
AWN_BINARY	FLFLG	0.1634	AWN_BINARY.FLFLG	0.181191	AWN_BINARY.P2/P3	FLFLG	P2/P3
AWN_BINARY	HULGRLG	0.2313	AWN_BINARY.HULGRLG	0.214451	AWN_BINARY.P2/P3	HULGRLG	P2/P3
AWN_BINARY	CULM_ANGLE	0.8174	AWN_BINARY.CULM_ANGLE	0.190694	AWN_BINARY.P2/P3	CULM_ANGLE	P2/P3
AWN_BINARY	STOLON_BINARY	0.0389	AWN_BINARY.STOLON_BINARY	0.0707349	AWN_BINARY.P2/P3	STOLON_BINARY	P2/P3
AWN_BINARY	PNNB	0.0206	AWN_BINARY.PNNB	-0.0854512	AWN_BINARY.P2/P3	PNNB	P2/P3
		1	AWN_BINARY.AWN_BINARY	0	AWN_BINARY.P2/P3	AWN_BINARY	P2/P3
AWNPLU	DTHD	0.7738	AWNPLU.DTHD	-0.184768	AWNPLU.P2/P3	DTHD	P2/P3
AWNPLU	HULGRCO	0.0105	AWNPLU.HULGRCO	-0.168115	AWNPLU.P2/P3	HULGRCO	P2/P3
AWNPLU	SDSH_BINARY	0.7377	AWNPLU.SDSH_BINARY	0.101239	AWNPLU.P2/P3	SDSH_BINARY	P2/P3
AWNPLU	HULGRVOL	0.3613	AWNPLU.HULGRVOL	-0.0816618	AWNPLU.P2/P3	HULGRVOL	P2/P3
AWNPLU	HULGRWD	0.3092	AWNPLU.HULGRWD	-0.16042	AWNPLU.P2/P3	HULGRWD	P2/P3
AWNPLU	PTHT	0.054	AWNPLU.PTHT	0.110926	AWNPLU.P2/P3	PTHT	P2/P3
AWNPLU	UNFILGRNB	0.1585	AWNPLU.UNFILGRNB	-0.380675	AWNPLU.P2/P3	UNFILGRNB	P2/P3
AWNPLU	PBRNB	0.3099	AWNPLU.PBRNB	-0.324278	AWNPLU.P2/P3	PBRNB	P2/P3
AWNPLU	PNLG	0.2445	AWNPLU.PNLG	-0.153164	AWNPLU.P2/P3	PNLG	P2/P3
AWNPLU	FLFLWD	0.7497	AWNPLU.FLFLWD	-0.0871039	AWNPLU.P2/P3	FLFLWD	P2/P3
AWNPLU	FLFLG	0.5843	AWNPLU.FLFLG	-0.144071	AWNPLU.P2/P3	FLFLG	P2/P3
AWNPLU	HULGRLG	0.3938	AWNPLU.HULGRLG	0.211717	AWNPLU.P2/P3	HULGRLG	P2/P3
AWNPLU	CULM_ANGLE	0.6596	AWNPLU.CULM_ANGLE	0.428171	AWNPLU.P2/P3	CULM_ANGLE	P2/P3
AWNPLU	STOLON_BINARY	0.9146	AWNPLU.STOLON_BINARY	0.145747	AWNPLU.P2/P3	STOLON_BINARY	P2/P3
AWNPLU	PNNB	0.1778	AWNPLU.PNNB	0.0490386	AWNPLU.P2/P3	PNNB	P2/P3
AWNPLU	AWN_BINARY	0.1132	AWNPLU.AWN_BINARY	0.722667	AWNPLU.P2/P3	AWN_BINARY	P2/P3
		1	AWNPLU.AWNPLU	0	AWNPLU.P2/P3	AWNPLU	P2/P3
HULGRCO	DTHD	0.0698	HULGRCO.DTHD	-0.0363984	HULGRCO.P4	DTHD	P4
SDSH_BINARY	DTHD	0.6126	SDSH_BINARY.DTHD	-0.162889	SDSH_BINARY.P4	DTHD	P4
SDSH_BINARY	HULGRCO	0.9809	SDSH_BINARY.HULGRCO	0.116802	SDSH_BINARY.P4	HULGRCO	P4
HULGRVOL	DTHD	0.2849	HULGRVOL.DTHD	-0.279131	HULGRVOL.P4	DTHD	P4
HULGRVOL	HULGRCO	0.4383	HULGRVOL.HULGRCO	-0.0726217	HULGRVOL.P4	HULGRCO	P4
HULGRVOL	SDSH_BINARY	0.7969	HULGRVOL.SDSH_BINARY	0.0130191	HULGRVOL.P4	SDSH_BINARY	P4
HULGRWD	DTHD	0.5127	HULGRWD.DTHD	-0.100523	HULGRWD.P4	DTHD	P4
HULGRWD	HULGRCO	0.384	HULGRWD.HULGRCO	0.0189729	HULGRWD.P4	HULGRCO	P4
HULGRWD	SDSH_BINARY	0.9825	HULGRWD.SDSH_BINARY	0.00387496	HULGRWD.P4	SDSH_BINARY	P4
HULGRWD	HULGRVOL	0.7861	HULGRWD.HULGRVOL	0.94435	HULGRWD.P4	HULGRVOL	P4
PTHT	DTHD	0.0209	PTHT.DTHD	0.510312	PTHT.P4	DTHD	P4
PTHT	HULGRCO	0.7259	PTHT.HULGRCO	-0.0678544	PTHT.P4	HULGRCO	P4
PTHT	SDSH_BINARY	0.5979	PTHT.SDSH_BINARY	-0.366066	PTHT.P4	SDSH_BINARY	P4
PTHT	HULGRVOL	0.5459	PTHT.HULGRVOL	-0.0397293	PTHT.P4	HULGRVOL	P4
PTHT	HULGRWD	0.9019	PTHT.HULGRWD	0.0494797	PTHT.P4	HULGRWD	P4
UNFILGRNB	DTHD	0.7555	UNFILGRNB.DTHD	0.287601	UNFILGRNB.P4	DTHD	P4
UNFILGRNB	HULGRCO	0.6431	UNFILGRNB.HULGRCO	-0.138518	UNFILGRNB.P4	HULGRCO	P4
UNFILGRNB	SDSH_BINARY	0.1752	UNFILGRNB.SDSH_BINARY	-0.287317	UNFILGRNB.P4	SDSH_BINARY	P4
UNFILGRNB	HULGRVOL	0.4087	UNFILGRNB.HULGRVOL	-0.35566	UNFILGRNB.P4	HULGRVOL	P4
UNFILGRNB	HULGRWD	0.3789	UNFILGRNB.HULGRWD	-0.34688	UNFILGRNB.P4	HULGRWD	P4
UNFILGRNB	PTHT	0.0555	UNFILGRNB.PTHT	0.604867	UNFILGRNB.P4	PTHT	P4
PBRNB	DTHD	0.0462	PBRNB.DTHD	0.460275	PBRNB.P4	DTHD	P4
PBRNB	HULGRCO	0.7566	PBRNB.HULGRCO	0.205003	PBRNB.P4	HULGRCO	P4
PBRNB	SDSH_BINARY	0.8759	PBRNB.SDSH_BINARY	-0.175303	PBRNB.P4	SDSH_BINARY	P4
PBRNB	HULGRVOL	0.1918	PBRNB.HULGRVOL	-0.214547	PBRNB.P4	HULGRVOL	P4
PBRNB	HULGRWD	0.1821	PBRNB.HULGRWD	-0.101521	PBRNB.P4	HULGRWD	P4
PBRNB	PTHT	0.0046	PBRNB.PTHT	0.691286	PBRNB.P4	PTHT	P4
PBRNB	UNFILGRNB	0.1122	PBRNB.UNFILGRNB	0.676247	PBRNB.P4	UNFILGRNB	P4
PNLG	DTHD	0.1955	PNLG.DTHD	0.398015	PNLG.P4	DTHD	P4
PNLG	HULGRCO	0.6033	PNLG.HULGRCO	0.190958	PNLG.P4	HULGRCO	P4
PNLG	SDSH_BINARY	0.3141	PNLG.SDSH_BINARY	-0.215047	PNLG.P4	SDSH_BINARY	P4
PNLG	HULGRVOL	0.1149	PNLG.HULGRVOL	-0.138901	PNLG.P4	HULGRVOL	P4
PNLG	HULGRWD	0.1296	PNLG.HULGRWD	-0.0387845	PNLG.P4	HULGRWD	P4
PNLG	PTHT	0.1751	PNLG.PTHT	0.644257	PNLG.P4	PTHT	P4
PNLG	UNFILGRNB	0.3369	PNLG.UNFILGRNB	0.649635	PNLG.P4	UNFILGRNB	P4
PNLG	PBRNB	0.0365	PNLG.PBRNB	0.872466	PNLG.P4	PBRNB	P4
FLFLWD	DTHD	0.8161	FLFLWD.DTHD	-0.289971	FLFLWD.P4	DTHD	P4
FLFLWD	HULGRCO	0.1435	FLFLWD.HULGRCO	-0.200497	FLFLWD.P4	HULGRCO	P4
FLFLWD	SDSH_BINARY	0.7571	FLFLWD.SDSH_BINARY	0.149344	FLFLWD.P4	SDSH_BINARY	P4
FLFLWD	HULGRVOL	0.7936	FLFLWD.HULGRVOL	0.387971	FLFLWD.P4	HULGRVOL	P4
FLFLWD	HULGRWD	0.7145	FLFLWD.HULGRWD	0.355451	FLFLWD.P4	HULGRWD	P4
FLFLWD	PTHT	0.9859	FLFLWD.PTHT	0.0371374	FLFLWD.P4	PTHT	P4
FLFLWD	UNFILGRNB	0.5688	FLFLWD.UNFILGRNB	0.207317	FLFLWD.P4	UNFILGRNB	P4
FLFLWD	PBRNB	0.0753	FLFLWD.PBRNB	0.207233	FLFLWD.P4	PBRNB	P4
FLFLWD	PNLG	0.3306	FLFLWD.PNLG	0.201441	FLFLWD.P4	PNLG	P4
FLFLG	DTHD	0.8046	FLFLG.DTHD	-0.052724	FLFLG.P4	DTHD	P4
FLFLG	HULGRCO	0.3252	FLFLG.HULGRCO	-0.0100256	FLFLG.P4	HULGRCO	P4
FLFLG	SDSH_BINARY	0.9614	FLFLG.SDSH_BINARY	0.0583384	FLFLG.P4	SDSH_BINARY	P4
FLFLG	HULGRVOL	0.0385	FLFLG.HULGRVOL	0.268749	FLFLG.P4	HULGRVOL	P4
FLFLG	HULGRWD	0.0086	FLFLG.HULGRWD	0.232286	FLFLG.P4	HULGRWD	P4
FLFLG	PTHT	0.6074	FLFLG.PTHT	0.147797	FLFLG.P4	PTHT	P4
FLFLG	UNFILGRNB	0.3114	FLFLG.UNFILGRNB	0.353113	FLFLG.P4	UNFILGRNB	P4
FLFLG	PBRNB	0.4338	FLFLG.PBRNB	0.288106	FLFLG.P4	PBRNB	P4
FLFLG	PNLG	0.405	FLFLG.PNLG	0.478933	FLFLG.P4	PNLG	P4
FLFLG	FLFLWD	0.7785	FLFLG.FLFLWD	0.522279	FLFLG.P4	FLFLWD	P4
HULGRLG	DTHD	0.232	HULGRLG.DTHD	-0.415858	HULGRLG.P4	DTHD	P4
HULGRLG	HULGRCO	0.392	HULGRLG.HULGRCO	-0.225944	HULGRLG.P4	HULGRCO	P4
HULGRLG	SDSH_BINARY	0.0462	HULGRLG.SDSH_BINARY	0.0912935	HULGRLG.P4	SDSH_BINARY	P4
HULGRLG	HULGRVOL	0.3138	HULGRLG.HULGRVOL	0.546538	HULGRLG.P4	HULGRVOL	P4
HULGRLG	HULGRWD	0.4414	HULGRLG.HULGRWD	0.259992	HULGRLG.P4	HULGRWD	P4
HULGRLG	PTHT	0.5358	HULGRLG.PTHT	-0.150731	HULGRLG.P4	PTHT	P4
HULGRLG	UNFILGRNB	0.4138	HULGRLG.UNFILGRNB	-0.119922	HULGRLG.P4	UNFILGRNB	P4
HULGRLG	PBRNB	0.637	HULGRLG.PBRNB	-0.265119	HULGRLG.P4	PBRNB	P4
HULGRLG	PNLG	0.2269	HULGRLG.PNLG	-0.192031	HULGRLG.P4	PNLG	P4
HULGRLG	FLFLWD	0.225	HULGRLG.FLFLWD	0.298939	HULGRLG.P4	FLFLWD	P4
HULGRLG	FLFLG	0.2555	HULGRLG.FLFLG	0.256096	HULGRLG.P4	FLFLG	P4
CULM_ANGLE	DTHD	0.3524	CULM_ANGLE.DTHD	-0.250972	CULM_ANGLE.P4	DTHD	P4
CULM_ANGLE	HULGRCO	0.8107	CULM_ANGLE.HULGRCO	-0.0126814	CULM_ANGLE.P4	HULGRCO	P4
CULM_ANGLE	SDSH_BINARY	0.5664	CULM_ANGLE.SDSH_BINARY	0.308766	CULM_ANGLE.P4	SDSH_BINARY	P4
CULM_ANGLE	HULGRVOL	0.168	CULM_ANGLE.HULGRVOL	-0.117615	CULM_ANGLE.P4	HULGRVOL	P4
CULM_ANGLE	HULGRWD	0.2696	CULM_ANGLE.HULGRWD	-0.238033	CULM_ANGLE.P4	HULGRWD	P4
CULM_ANGLE	PTHT	0.219	CULM_ANGLE.PTHT	-0.227214	CULM_ANGLE.P4	PTHT	P4
CULM_ANGLE	UNFILGRNB	0.9821	CULM_ANGLE.UNFILGRNB	-0.321745	CULM_ANGLE.P4	UNFILGRNB	P4
CULM_ANGLE	PBRNB	0.8712	CULM_ANGLE.PBRNB	-0.335044	CULM_ANGLE.P4	PBRNB	P4
CULM_ANGLE	PNLG	0.352	CULM_ANGLE.PNLG	-0.361735	CULM_ANGLE.P4	PNLG	P4
CULM_ANGLE	FLFLWD	0.2342	CULM_ANGLE.FLFLWD	-0.201474	CULM_ANGLE.P4	FLFLWD	P4
CULM_ANGLE	FLFLG	0.3623	CULM_ANGLE.FLFLG	-0.307775	CULM_ANGLE.P4	FLFLG	P4
CULM_ANGLE	HULGRLG	0.292	CULM_ANGLE.HULGRLG	0.274156	CULM_ANGLE.P4	HULGRLG	P4
STOLON_BINARY	DTHD	0.9397	STOLON_BINARY.DTHD	0.109874	STOLON_BINARY.P4	DTHD	P4
STOLON_BINARY	HULGRCO	0.3964	STOLON_BINARY.HULGRCO	-0.3713	STOLON_BINARY.P4	HULGRCO	P4
STOLON_BINARY	SDSH_BINARY	0.9519	STOLON_BINARY.SDSH_BINARY	-0.0967394	STOLON_BINARY.P4	SDSH_BINARY	P4
STOLON_BINARY	HULGRVOL	0.3946	STOLON_BINARY.HULGRVOL	-0.0671703	STOLON_BINARY.P4	HULGRVOL	P4
STOLON_BINARY	HULGRWD	0.7195	STOLON_BINARY.HULGRWD	-0.0654258	STOLON_BINARY.P4	HULGRWD	P4
STOLON_BINARY	PTHT	0.0475	STOLON_BINARY.PTHT	0.190853	STOLON_BINARY.P4	PTHT	P4
STOLON_BINARY	UNFILGRNB	0.8378	STOLON_BINARY.UNFILGRNB	-0.035635	STOLON_BINARY.P4	UNFILGRNB	P4
STOLON_BINARY	PBRNB	0.3185	STOLON_BINARY.PBRNB	-0.0283823	STOLON_BINARY.P4	PBRNB	P4
STOLON_BINARY	PNLG	0.7551	STOLON_BINARY.PNLG	-0.131279	STOLON_BINARY.P4	PNLG	P4
STOLON_BINARY	FLFLWD	0.5379	STOLON_BINARY.FLFLWD	-0.155646	STOLON_BINARY.P4	FLFLWD	P4
STOLON_BINARY	FLFLG	0.1911	STOLON_BINARY.FLFLG	-0.252482	STOLON_BINARY.P4	FLFLG	P4
STOLON_BINARY	HULGRLG	0.203	STOLON_BINARY.HULGRLG	-0.0244844	STOLON_BINARY.P4	HULGRLG	P4
STOLON_BINARY	CULM_ANGLE	0.0061	STOLON_BINARY.CULM_ANGLE	0.452002	STOLON_BINARY.P4	CULM_ANGLE	P4
PNNB	DTHD	0.3742	PNNB.DTHD	-0.118941	PNNB.P4	DTHD	P4
PNNB	HULGRCO	0.0825	PNNB.HULGRCO	0.295225	PNNB.P4	HULGRCO	P4
PNNB	SDSH_BINARY	0.7532	PNNB.SDSH_BINARY	0.238754	PNNB.P4	SDSH_BINARY	P4
PNNB	HULGRVOL	0.8543	PNNB.HULGRVOL	-0.368783	PNNB.P4	HULGRVOL	P4
PNNB	HULGRWD	0.6709	PNNB.HULGRWD	-0.349965	PNNB.P4	HULGRWD	P4
PNNB	PTHT	0.5381	PNNB.PTHT	-0.571209	PNNB.P4	PTHT	P4
PNNB	UNFILGRNB	0.1122	PNNB.UNFILGRNB	-0.406278	PNNB.P4	UNFILGRNB	P4
PNNB	PBRNB	0.0701	PNNB.PBRNB	-0.363698	PNNB.P4	PBRNB	P4
PNNB	PNLG	0.2333	PNNB.PNLG	-0.282834	PNNB.P4	PNLG	P4
PNNB	FLFLWD	0.5431	PNNB.FLFLWD	-0.612059	PNNB.P4	FLFLWD	P4
PNNB	FLFLG	0.1501	PNNB.FLFLG	-0.446883	PNNB.P4	FLFLG	P4
PNNB	HULGRLG	0.1851	PNNB.HULGRLG	-0.262777	PNNB.P4	HULGRLG	P4
PNNB	CULM_ANGLE	0.904	PNNB.CULM_ANGLE	0.180517	PNNB.P4	CULM_ANGLE	P4
PNNB	STOLON_BINARY	0.1786	PNNB.STOLON_BINARY	-0.1298	PNNB.P4	STOLON_BINARY	P4
AWN_BINARY	DTHD	0.6751	AWN_BINARY.DTHD	0.109685	AWN_BINARY.P4	DTHD	P4
AWN_BINARY	HULGRCO	0.5758	AWN_BINARY.HULGRCO	-0.129066	AWN_BINARY.P4	HULGRCO	P4
AWN_BINARY	SDSH_BINARY	0.6255	AWN_BINARY.SDSH_BINARY	-0.159218	AWN_BINARY.P4	SDSH_BINARY	P4
AWN_BINARY	HULGRVOL	0.2406	AWN_BINARY.HULGRVOL	0.0734374	AWN_BINARY.P4	HULGRVOL	P4
AWN_BINARY	HULGRWD	0.3497	AWN_BINARY.HULGRWD	0.129044	AWN_BINARY.P4	HULGRWD	P4
AWN_BINARY	PTHT	0.7322	AWN_BINARY.PTHT	0.21093	AWN_BINARY.P4	PTHT	P4
AWN_BINARY	UNFILGRNB	0.6033	AWN_BINARY.UNFILGRNB	0.0155268	AWN_BINARY.P4	UNFILGRNB	P4
AWN_BINARY	PBRNB	0.5322	AWN_BINARY.PBRNB	-0.038831	AWN_BINARY.P4	PBRNB	P4
AWN_BINARY	PNLG	0.5419	AWN_BINARY.PNLG	0.0163456	AWN_BINARY.P4	PNLG	P4
AWN_BINARY	FLFLWD	0.8407	AWN_BINARY.FLFLWD	-0.0380026	AWN_BINARY.P4	FLFLWD	P4
AWN_BINARY	FLFLG	0.1634	AWN_BINARY.FLFLG	-0.0187105	AWN_BINARY.P4	FLFLG	P4
AWN_BINARY	HULGRLG	0.2313	AWN_BINARY.HULGRLG	-0.129216	AWN_BINARY.P4	HULGRLG	P4
AWN_BINARY	CULM_ANGLE	0.8174	AWN_BINARY.CULM_ANGLE	0.143143	AWN_BINARY.P4	CULM_ANGLE	P4
AWN_BINARY	STOLON_BINARY	0.0389	AWN_BINARY.STOLON_BINARY	0.441457	AWN_BINARY.P4	STOLON_BINARY	P4
AWN_BINARY	PNNB	0.0206	AWN_BINARY.PNNB	-0.247774	AWN_BINARY.P4	PNNB	P4
AWNPLU	DTHD	0.7738	AWNPLU.DTHD	-0.176759	AWNPLU.P4	DTHD	P4
AWNPLU	HULGRCO	0.0105	AWNPLU.HULGRCO	0.253314	AWNPLU.P4	HULGRCO	P4
AWNPLU	SDSH_BINARY	0.7377	AWNPLU.SDSH_BINARY	0.390532	AWNPLU.P4	SDSH_BINARY	P4
AWNPLU	HULGRVOL	0.3613	AWNPLU.HULGRVOL	0.235577	AWNPLU.P4	HULGRVOL	P4
AWNPLU	HULGRWD	0.3092	AWNPLU.HULGRWD	0.22634	AWNPLU.P4	HULGRWD	P4
AWNPLU	PTHT	0.054	AWNPLU.PTHT	-0.458499	AWNPLU.P4	PTHT	P4
AWNPLU	UNFILGRNB	0.1585	AWNPLU.UNFILGRNB	-0.671748	AWNPLU.P4	UNFILGRNB	P4
AWNPLU	PBRNB	0.3099	AWNPLU.PBRNB	-0.486202	AWNPLU.P4	PBRNB	P4
AWNPLU	PNLG	0.2445	AWNPLU.PNLG	-0.418702	AWNPLU.P4	PNLG	P4
AWNPLU	FLFLWD	0.7497	AWNPLU.FLFLWD	-0.255103	AWNPLU.P4	FLFLWD	P4
AWNPLU	FLFLG	0.5843	AWNPLU.FLFLG	-0.21696	AWNPLU.P4	FLFLG	P4
AWNPLU	HULGRLG	0.3938	AWNPLU.HULGRLG	0.126431	AWNPLU.P4	HULGRLG	P4
AWNPLU	CULM_ANGLE	0.6596	AWNPLU.CULM_ANGLE	0.346192	AWNPLU.P4	CULM_ANGLE	P4
AWNPLU	STOLON_BINARY	0.9146	AWNPLU.STOLON_BINARY	0.0758129	AWNPLU.P4	STOLON_BINARY	P4
AWNPLU	PNNB	0.1778	AWNPLU.PNNB	0.318154	AWNPLU.P4	PNNB	P4
AWNPLU	AWN_BINARY	0.1132	AWNPLU.AWN_BINARY	0.305651	AWNPLU.P4	AWN_BINARY	P4

## Sheet: CU_Correlation
x	y	p	Trait_Pair	correlation	i.x	i.y	Phenotypic group
PTHT	STOLON_BINARY	0.4505	PTHT.STOLON_BINARY	0.492578	PTHT.P1	STOLON_BINARY	P1
PNLG	STOLON_BINARY	0.0883	PNLG.STOLON_BINARY	-0.00262162	PNLG.P1	STOLON_BINARY	P1
PNLG	PTHT	0.2892	PNLG.PTHT	0.359001	PNLG.P1	PTHT	P1
PNNB	STOLON_BINARY	0.4092	PNNB.STOLON_BINARY	-0.269408	PNNB.P1	STOLON_BINARY	P1
PNNB	PTHT	0.6083	PNNB.PTHT	-0.256275	PNNB.P1	PTHT	P1
PNNB	PNLG	0.8084	PNNB.PNLG	-0.139924	PNNB.P1	PNLG	P1
SEED_S2_BAG	STOLON_BINARY	0.31	SEED_S2_BAG.STOLON_BINARY	-0.211985	SEED_S2_BAG.P1	STOLON_BINARY	P1
SEED_S2_BAG	PTHT	0.2292	SEED_S2_BAG.PTHT	-0.179736	SEED_S2_BAG.P1	PTHT	P1
SEED_S2_BAG	PNLG	0.0057	SEED_S2_BAG.PNLG	-0.153179	SEED_S2_BAG.P1	PNLG	P1
SEED_S2_BAG	PNNB	0.0035	SEED_S2_BAG.PNNB	0.59746	SEED_S2_BAG.P1	PNNB	P1
SEED_S2_NONBAG	STOLON_BINARY	0.2624	SEED_S2_NONBAG.STOLON_BINARY	-0.197992	SEED_S2_NONBAG.P1	STOLON_BINARY	P1
SEED_S2_NONBAG	PTHT	0.7724	SEED_S2_NONBAG.PTHT	-0.266766	SEED_S2_NONBAG.P1	PTHT	P1
SEED_S2_NONBAG	PNLG	0.5576	SEED_S2_NONBAG.PNLG	-0.0580317	SEED_S2_NONBAG.P1	PNLG	P1
SEED_S2_NONBAG	PNNB	0.0276	SEED_S2_NONBAG.PNNB	0.745838	SEED_S2_NONBAG.P1	PNNB	P1
SEED_S2_NONBAG	SEED_S2_BAG	0.2252	SEED_S2_NONBAG.SEED_S2_BAG	0.763604	SEED_S2_NONBAG.P1	SEED_S2_BAG	P1
SDSH_BINARY	STOLON_BINARY	0.8957	SDSH_BINARY.STOLON_BINARY	-0.126359	SDSH_BINARY.P1	STOLON_BINARY	P1
SDSH_BINARY	PTHT	0.2622	SDSH_BINARY.PTHT	-0.0890703	SDSH_BINARY.P1	PTHT	P1
SDSH_BINARY	PNLG	0.0269	SDSH_BINARY.PNLG	0.118955	SDSH_BINARY.P1	PNLG	P1
SDSH_BINARY	PNNB	0.9746	SDSH_BINARY.PNNB	-0.0554502	SDSH_BINARY.P1	PNNB	P1
SDSH_BINARY	SEED_S2_BAG	0.0155	SDSH_BINARY.SEED_S2_BAG	-0.220643	SDSH_BINARY.P1	SEED_S2_BAG	P1
SDSH_BINARY	SEED_S2_NONBAG	0.5427	SDSH_BINARY.SEED_S2_NONBAG	-0.252919	SDSH_BINARY.P1	SEED_S2_NONBAG	P1
STEMCOL_BINARY	STOLON_BINARY	0.0113	STEMCOL_BINARY.STOLON_BINARY	0.116749	STEMCOL_BINARY.P1	STOLON_BINARY	P1
STEMCOL_BINARY	PTHT	0.1215	STEMCOL_BINARY.PTHT	-0.133931	STEMCOL_BINARY.P1	PTHT	P1
STEMCOL_BINARY	PNLG	0.1753	STEMCOL_BINARY.PNLG	-0.451697	STEMCOL_BINARY.P1	PNLG	P1
STEMCOL_BINARY	PNNB	0.3596	STEMCOL_BINARY.PNNB	0.171594	STEMCOL_BINARY.P1	PNNB	P1
STEMCOL_BINARY	SEED_S2_BAG	0.0386	STEMCOL_BINARY.SEED_S2_BAG	0.109408	STEMCOL_BINARY.P1	SEED_S2_BAG	P1
STEMCOL_BINARY	SEED_S2_NONBAG	0.0744	STEMCOL_BINARY.SEED_S2_NONBAG	-0.0245095	STEMCOL_BINARY.P1	SEED_S2_NONBAG	P1
STEMCOL_BINARY	SDSH_BINARY	0.4924	STEMCOL_BINARY.SDSH_BINARY	0.0828058	STEMCOL_BINARY.P1	SDSH_BINARY	P1
DTHD	STOLON_BINARY	0.6075	DTHD.STOLON_BINARY	-0.138697	DTHD.P1	STOLON_BINARY	P1
DTHD	PTHT	0.8479	DTHD.PTHT	-0.14815	DTHD.P1	PTHT	P1
DTHD	PNLG	0.868	DTHD.PNLG	0.175825	DTHD.P1	PNLG	P1
DTHD	PNNB	0.84	DTHD.PNNB	-0.582385	DTHD.P1	PNNB	P1
DTHD	SEED_S2_BAG	0.0648	DTHD.SEED_S2_BAG	-0.23921	DTHD.P1	SEED_S2_BAG	P1
DTHD	SEED_S2_NONBAG	0.9302	DTHD.SEED_S2_NONBAG	-0.575596	DTHD.P1	SEED_S2_NONBAG	P1
DTHD	SDSH_BINARY	0.0275	DTHD.SDSH_BINARY	0.0734102	DTHD.P1	SDSH_BINARY	P1
DTHD	STEMCOL_BINARY	0.0426	DTHD.STEMCOL_BINARY	-0.210949	DTHD.P1	STEMCOL_BINARY	P1
CUNO	STOLON_BINARY	0.6674	CUNO.STOLON_BINARY	-0.224049	CUNO.P1	STOLON_BINARY	P1
CUNO	PTHT	0.5318	CUNO.PTHT	-0.363572	CUNO.P1	PTHT	P1
CUNO	PNLG	0.0236	CUNO.PNLG	-0.0707459	CUNO.P1	PNLG	P1
CUNO	PNNB	0.306	CUNO.PNNB	-0.306818	CUNO.P1	PNNB	P1
CUNO	SEED_S2_BAG	0.9722	CUNO.SEED_S2_BAG	-0.444064	CUNO.P1	SEED_S2_BAG	P1
CUNO	SEED_S2_NONBAG	0.3302	CUNO.SEED_S2_NONBAG	-0.52223	CUNO.P1	SEED_S2_NONBAG	P1
CUNO	SDSH_BINARY	0.101	CUNO.SDSH_BINARY	0.188354	CUNO.P1	SDSH_BINARY	P1
CUNO	STEMCOL_BINARY	0.1584	CUNO.STEMCOL_BINARY	0.0126614	CUNO.P1	STEMCOL_BINARY	P1
CUNO	DTHD	0.9225	CUNO.DTHD	0.660288	CUNO.P1	DTHD	P1
FLFLG	STOLON_BINARY	0.0796	FLFLG.STOLON_BINARY	-0.357181	FLFLG.P1	STOLON_BINARY	P1
FLFLG	PTHT	0.5276	FLFLG.PTHT	-0.0344946	FLFLG.P1	PTHT	P1
FLFLG	PNLG	0.9236	FLFLG.PNLG	0.350927	FLFLG.P1	PNLG	P1
FLFLG	PNNB	0.5112	FLFLG.PNNB	-0.258344	FLFLG.P1	PNNB	P1
FLFLG	SEED_S2_BAG	0.0326	FLFLG.SEED_S2_BAG	-0.0266728	FLFLG.P1	SEED_S2_BAG	P1
FLFLG	SEED_S2_NONBAG	0.0773	FLFLG.SEED_S2_NONBAG	-0.108813	FLFLG.P1	SEED_S2_NONBAG	P1
FLFLG	SDSH_BINARY	0.7127	FLFLG.SDSH_BINARY	0.103476	FLFLG.P1	SDSH_BINARY	P1
FLFLG	STEMCOL_BINARY	0.7842	FLFLG.STEMCOL_BINARY	-0.0956444	FLFLG.P1	STEMCOL_BINARY	P1
FLFLG	DTHD	0.4465	FLFLG.DTHD	0.288176	FLFLG.P1	DTHD	P1
FLFLG	CUNO	0.208	FLFLG.CUNO	0.0979431	FLFLG.P1	CUNO	P1
PERICARPCOL_BINARY	STOLON_BINARY	0.735	PERICARPCOL_BINARY.STOLON_BINARY	-0.120105	PERICARPCOL_BINARY.P1	STOLON_BINARY	P1
PERICARPCOL_BINARY	PTHT	0.0774	PERICARPCOL_BINARY.PTHT	0.0885215	PERICARPCOL_BINARY.P1	PTHT	P1
PERICARPCOL_BINARY	PNLG	0.777	PERICARPCOL_BINARY.PNLG	-0.167358	PERICARPCOL_BINARY.P1	PNLG	P1
PERICARPCOL_BINARY	PNNB	0.752	PERICARPCOL_BINARY.PNNB	-0.0164175	PERICARPCOL_BINARY.P1	PNNB	P1
PERICARPCOL_BINARY	SEED_S2_BAG	0.0169	PERICARPCOL_BINARY.SEED_S2_BAG	-0.00690252	PERICARPCOL_BINARY.P1	SEED_S2_BAG	P1
PERICARPCOL_BINARY	SEED_S2_NONBAG	0.4256	PERICARPCOL_BINARY.SEED_S2_NONBAG	-0.148989	PERICARPCOL_BINARY.P1	SEED_S2_NONBAG	P1
PERICARPCOL_BINARY	SDSH_BINARY	0.765	PERICARPCOL_BINARY.SDSH_BINARY	-0.0851177	PERICARPCOL_BINARY.P1	SDSH_BINARY	P1
PERICARPCOL_BINARY	STEMCOL_BINARY	0.111	PERICARPCOL_BINARY.STEMCOL_BINARY	0.31076	PERICARPCOL_BINARY.P1	STEMCOL_BINARY	P1
PERICARPCOL_BINARY	DTHD	0.999	PERICARPCOL_BINARY.DTHD	-0.0210578	PERICARPCOL_BINARY.P1	DTHD	P1
PERICARPCOL_BINARY	CUNO	0.2333	PERICARPCOL_BINARY.CUNO	0.216421	PERICARPCOL_BINARY.P1	CUNO	P1
PERICARPCOL_BINARY	FLFLG	0.7894	PERICARPCOL_BINARY.FLFLG	0.089555	PERICARPCOL_BINARY.P1	FLFLG	P1
CULM_ANGLE	STOLON_BINARY	0.515	CULM_ANGLE.STOLON_BINARY	-0.49839	CULM_ANGLE.P1	STOLON_BINARY	P1
CULM_ANGLE	PTHT	0.9578	CULM_ANGLE.PTHT	-0.210051	CULM_ANGLE.P1	PTHT	P1
CULM_ANGLE	PNLG	0.9146	CULM_ANGLE.PNLG	-0.0634333	CULM_ANGLE.P1	PNLG	P1
CULM_ANGLE	PNNB	0.8556	CULM_ANGLE.PNNB	0.0469673	CULM_ANGLE.P1	PNNB	P1
CULM_ANGLE	SEED_S2_BAG	0.1052	CULM_ANGLE.SEED_S2_BAG	0.0502646	CULM_ANGLE.P1	SEED_S2_BAG	P1
CULM_ANGLE	SEED_S2_NONBAG	0.9743	CULM_ANGLE.SEED_S2_NONBAG	-0.103415	CULM_ANGLE.P1	SEED_S2_NONBAG	P1
CULM_ANGLE	SDSH_BINARY	0.1674	CULM_ANGLE.SDSH_BINARY	0.188764	CULM_ANGLE.P1	SDSH_BINARY	P1
CULM_ANGLE	STEMCOL_BINARY	0.0097	CULM_ANGLE.STEMCOL_BINARY	0.0613828	CULM_ANGLE.P1	STEMCOL_BINARY	P1
CULM_ANGLE	DTHD	0.208	CULM_ANGLE.DTHD	0.237529	CULM_ANGLE.P1	DTHD	P1
CULM_ANGLE	CUNO	0.4741	CULM_ANGLE.CUNO	0.204145	CULM_ANGLE.P1	CUNO	P1
CULM_ANGLE	FLFLG	0.0478	CULM_ANGLE.FLFLG	0.177664	CULM_ANGLE.P1	FLFLG	P1
CULM_ANGLE	PERICARPCOL_BINARY	0.7086	CULM_ANGLE.PERICARPCOL_BINARY	0.329444	CULM_ANGLE.P1	PERICARPCOL_BINARY	P1
AWN_BINARY	STOLON_BINARY	0.6935	AWN_BINARY.STOLON_BINARY	-0.351006	AWN_BINARY.P1	STOLON_BINARY	P1
AWN_BINARY	PTHT	0.8628	AWN_BINARY.PTHT	-0.143656	AWN_BINARY.P1	PTHT	P1
AWN_BINARY	PNLG	0.6361	AWN_BINARY.PNLG	-0.138191	AWN_BINARY.P1	PNLG	P1
AWN_BINARY	PNNB	0.368	AWN_BINARY.PNNB	0.0317546	AWN_BINARY.P1	PNNB	P1
AWN_BINARY	SEED_S2_BAG	0.1084	AWN_BINARY.SEED_S2_BAG	0.0744629	AWN_BINARY.P1	SEED_S2_BAG	P1
AWN_BINARY	SEED_S2_NONBAG	0.6785	AWN_BINARY.SEED_S2_NONBAG	0.155568	AWN_BINARY.P1	SEED_S2_NONBAG	P1
AWN_BINARY	SDSH_BINARY	0.4117	AWN_BINARY.SDSH_BINARY	-0.0557863	AWN_BINARY.P1	SDSH_BINARY	P1
AWN_BINARY	STEMCOL_BINARY	0.7948	AWN_BINARY.STEMCOL_BINARY	0.230286	AWN_BINARY.P1	STEMCOL_BINARY	P1
AWN_BINARY	DTHD	0.7787	AWN_BINARY.DTHD	-0.076373	AWN_BINARY.P1	DTHD	P1
AWN_BINARY	CUNO	0.6535	AWN_BINARY.CUNO	0.00779394	AWN_BINARY.P1	CUNO	P1
AWN_BINARY	FLFLG	0.0352	AWN_BINARY.FLFLG	0.130294	AWN_BINARY.P1	FLFLG	P1
AWN_BINARY	PERICARPCOL_BINARY	0.9741	AWN_BINARY.PERICARPCOL_BINARY	0.340906	AWN_BINARY.P1	PERICARPCOL_BINARY	P1
AWN_BINARY	CULM_ANGLE	0.0825	AWN_BINARY.CULM_ANGLE	0.0641439	AWN_BINARY.P1	CULM_ANGLE	P1
AWNPLU	STOLON_BINARY	0.6707	AWNPLU.STOLON_BINARY	-0.486725	AWNPLU.P1	STOLON_BINARY	P1
AWNPLU	PTHT	0.549	AWNPLU.PTHT	0.00396557	AWNPLU.P1	PTHT	P1
AWNPLU	PNLG	0.7933	AWNPLU.PNLG	-0.0583184	AWNPLU.P1	PNLG	P1
AWNPLU	PNNB	0.117	AWNPLU.PNNB	0.00730623	AWNPLU.P1	PNNB	P1
AWNPLU	SEED_S2_BAG	0.0831	AWNPLU.SEED_S2_BAG	0.0962536	AWNPLU.P1	SEED_S2_BAG	P1
AWNPLU	SEED_S2_NONBAG	0.4692	AWNPLU.SEED_S2_NONBAG	0.0289851	AWNPLU.P1	SEED_S2_NONBAG	P1
AWNPLU	SDSH_BINARY	0.2287	AWNPLU.SDSH_BINARY	-0.182833	AWNPLU.P1	SDSH_BINARY	P1
AWNPLU	STEMCOL_BINARY	0.9857	AWNPLU.STEMCOL_BINARY	0.167143	AWNPLU.P1	STEMCOL_BINARY	P1
AWNPLU	DTHD	0.6589	AWNPLU.DTHD	-0.0537366	AWNPLU.P1	DTHD	P1
AWNPLU	CUNO	0.8596	AWNPLU.CUNO	-0.111376	AWNPLU.P1	CUNO	P1
AWNPLU	FLFLG	0.1609	AWNPLU.FLFLG	0.239337	AWNPLU.P1	FLFLG	P1
AWNPLU	PERICARPCOL_BINARY	0.4919	AWNPLU.PERICARPCOL_BINARY	0.203355	AWNPLU.P1	PERICARPCOL_BINARY	P1
AWNPLU	CULM_ANGLE	0.02	AWNPLU.CULM_ANGLE	0.357809	AWNPLU.P1	CULM_ANGLE	P1
AWNPLU	AWN_BINARY	0.5091	AWNPLU.AWN_BINARY	0.559673	AWNPLU.P1	AWN_BINARY	P1
HULCL	STOLON_BINARY	0.3494	HULCL.STOLON_BINARY	-0.346261	HULCL.P1	STOLON_BINARY	P1
HULCL	PTHT	0.9118	HULCL.PTHT	-0.0368221	HULCL.P1	PTHT	P1
HULCL	PNLG	0.1873	HULCL.PNLG	0.115846	HULCL.P1	PNLG	P1
HULCL	PNNB	0.891	HULCL.PNNB	0.172102	HULCL.P1	PNNB	P1
HULCL	SEED_S2_BAG	0.2823	HULCL.SEED_S2_BAG	0.166099	HULCL.P1	SEED_S2_BAG	P1
HULCL	SEED_S2_NONBAG	0.6355	HULCL.SEED_S2_NONBAG	0.210722	HULCL.P1	SEED_S2_NONBAG	P1
HULCL	SDSH_BINARY	0.3345	HULCL.SDSH_BINARY	-0.0288832	HULCL.P1	SDSH_BINARY	P1
HULCL	STEMCOL_BINARY	0.948	HULCL.STEMCOL_BINARY	0.00733244	HULCL.P1	STEMCOL_BINARY	P1
HULCL	DTHD	0.9615	HULCL.DTHD	-0.160611	HULCL.P1	DTHD	P1
HULCL	CUNO	0.8688	HULCL.CUNO	-0.124102	HULCL.P1	CUNO	P1
HULCL	FLFLG	0.0048	HULCL.FLFLG	0.369299	HULCL.P1	FLFLG	P1
HULCL	PERICARPCOL_BINARY	0.9927	HULCL.PERICARPCOL_BINARY	0.312161	HULCL.P1	PERICARPCOL_BINARY	P1
HULCL	CULM_ANGLE	0.1179	HULCL.CULM_ANGLE	0.461044	HULCL.P1	CULM_ANGLE	P1
HULCL	AWN_BINARY	0.0673	HULCL.AWN_BINARY	0.325823	HULCL.P1	AWN_BINARY	P1
HULCL	AWNPLU	0.099	HULCL.AWNPLU	0.598413	HULCL.P1	AWNPLU	P1
		1	STOLON_BINARY.STOLON_BINARY	0	STOLON_BINARY.P2/P3	STOLON_BINARY	P2/P3
PTHT	STOLON_BINARY	0.4505	PTHT.STOLON_BINARY	0.263087	PTHT.P2/P3	STOLON_BINARY	P2/P3
		1	PTHT.PTHT	0	PTHT.P2/P3	PTHT	P2/P3
PNLG	STOLON_BINARY	0.0883	PNLG.STOLON_BINARY	-0.0415752	PNLG.P2/P3	STOLON_BINARY	P2/P3
PNLG	PTHT	0.2892	PNLG.PTHT	0.379439	PNLG.P2/P3	PTHT	P2/P3
		1	PNLG.PNLG	0	PNLG.P2/P3	PNLG	P2/P3
PNNB	STOLON_BINARY	0.4092	PNNB.STOLON_BINARY	0.0470668	PNNB.P2/P3	STOLON_BINARY	P2/P3
PNNB	PTHT	0.6083	PNNB.PTHT	-0.11688	PNNB.P2/P3	PTHT	P2/P3
PNNB	PNLG	0.8084	PNNB.PNLG	-0.250131	PNNB.P2/P3	PNLG	P2/P3
		1	PNNB.PNNB	0	PNNB.P2/P3	PNNB	P2/P3
SEED_S2_BAG	STOLON_BINARY	0.31	SEED_S2_BAG.STOLON_BINARY	0.128837	SEED_S2_BAG.P2/P3	STOLON_BINARY	P2/P3
SEED_S2_BAG	PTHT	0.2292	SEED_S2_BAG.PTHT	0.244612	SEED_S2_BAG.P2/P3	PTHT	P2/P3
SEED_S2_BAG	PNLG	0.0057	SEED_S2_BAG.PNLG	0.494407	SEED_S2_BAG.P2/P3	PNLG	P2/P3
SEED_S2_BAG	PNNB	0.0035	SEED_S2_BAG.PNNB	-0.0534645	SEED_S2_BAG.P2/P3	PNNB	P2/P3
		1	SEED_S2_BAG.SEED_S2_BAG	0	SEED_S2_BAG.P2/P3	SEED_S2_BAG	P2/P3
SEED_S2_NONBAG	STOLON_BINARY	0.2624	SEED_S2_NONBAG.STOLON_BINARY	0.24385	SEED_S2_NONBAG.P2/P3	STOLON_BINARY	P2/P3
SEED_S2_NONBAG	PTHT	0.7724	SEED_S2_NONBAG.PTHT	-0.0962528	SEED_S2_NONBAG.P2/P3	PTHT	P2/P3
SEED_S2_NONBAG	PNLG	0.5576	SEED_S2_NONBAG.PNLG	0.0997344	SEED_S2_NONBAG.P2/P3	PNLG	P2/P3
SEED_S2_NONBAG	PNNB	0.0276	SEED_S2_NONBAG.PNNB	0.368892	SEED_S2_NONBAG.P2/P3	PNNB	P2/P3
SEED_S2_NONBAG	SEED_S2_BAG	0.2252	SEED_S2_NONBAG.SEED_S2_BAG	0.492686	SEED_S2_NONBAG.P2/P3	SEED_S2_BAG	P2/P3
		1	SEED_S2_NONBAG.SEED_S2_NONBAG	0	SEED_S2_NONBAG.P2/P3	SEED_S2_NONBAG	P2/P3
SDSH_BINARY	STOLON_BINARY	0.8957	SDSH_BINARY.STOLON_BINARY	-0.162035	SDSH_BINARY.P2/P3	STOLON_BINARY	P2/P3
SDSH_BINARY	PTHT	0.2622	SDSH_BINARY.PTHT	-0.388691	SDSH_BINARY.P2/P3	PTHT	P2/P3
SDSH_BINARY	PNLG	0.0269	SDSH_BINARY.PNLG	-0.24984	SDSH_BINARY.P2/P3	PNLG	P2/P3
SDSH_BINARY	PNNB	0.9746	SDSH_BINARY.PNNB	-0.0810188	SDSH_BINARY.P2/P3	PNNB	P2/P3
SDSH_BINARY	SEED_S2_BAG	0.0155	SDSH_BINARY.SEED_S2_BAG	-0.594265	SDSH_BINARY.P2/P3	SEED_S2_BAG	P2/P3
SDSH_BINARY	SEED_S2_NONBAG	0.5427	SDSH_BINARY.SEED_S2_NONBAG	-0.014735	SDSH_BINARY.P2/P3	SEED_S2_NONBAG	P2/P3
		1	SDSH_BINARY.SDSH_BINARY	0	SDSH_BINARY.P2/P3	SDSH_BINARY	P2/P3
STEMCOL_BINARY	STOLON_BINARY	0.0113	STEMCOL_BINARY.STOLON_BINARY	-0.231466	STEMCOL_BINARY.P2/P3	STOLON_BINARY	P2/P3
STEMCOL_BINARY	PTHT	0.1215	STEMCOL_BINARY.PTHT	-0.0529957	STEMCOL_BINARY.P2/P3	PTHT	P2/P3
STEMCOL_BINARY	PNLG	0.1753	STEMCOL_BINARY.PNLG	-0.0169803	STEMCOL_BINARY.P2/P3	PNLG	P2/P3
STEMCOL_BINARY	PNNB	0.3596	STEMCOL_BINARY.PNNB	-0.20619	STEMCOL_BINARY.P2/P3	PNNB	P2/P3
STEMCOL_BINARY	SEED_S2_BAG	0.0386	STEMCOL_BINARY.SEED_S2_BAG	-0.451093	STEMCOL_BINARY.P2/P3	SEED_S2_BAG	P2/P3
STEMCOL_BINARY	SEED_S2_NONBAG	0.0744	STEMCOL_BINARY.SEED_S2_NONBAG	-0.599769	STEMCOL_BINARY.P2/P3	SEED_S2_NONBAG	P2/P3
STEMCOL_BINARY	SDSH_BINARY	0.4924	STEMCOL_BINARY.SDSH_BINARY	0.335299	STEMCOL_BINARY.P2/P3	SDSH_BINARY	P2/P3
		1	STEMCOL_BINARY.STEMCOL_BINARY	0	STEMCOL_BINARY.P2/P3	STEMCOL_BINARY	P2/P3
DTHD	STOLON_BINARY	0.6075	DTHD.STOLON_BINARY	-0.3225	DTHD.P2/P3	STOLON_BINARY	P2/P3
DTHD	PTHT	0.8479	DTHD.PTHT	0.0274232	DTHD.P2/P3	PTHT	P2/P3
DTHD	PNLG	0.868	DTHD.PNLG	0.0421702	DTHD.P2/P3	PNLG	P2/P3
DTHD	PNNB	0.84	DTHD.PNNB	-0.495617	DTHD.P2/P3	PNNB	P2/P3
DTHD	SEED_S2_BAG	0.0648	DTHD.SEED_S2_BAG	0.0507413	DTHD.P2/P3	SEED_S2_BAG	P2/P3
DTHD	SEED_S2_NONBAG	0.9302	DTHD.SEED_S2_NONBAG	-0.60551	DTHD.P2/P3	SEED_S2_NONBAG	P2/P3
DTHD	SDSH_BINARY	0.0275	DTHD.SDSH_BINARY	-0.381862	DTHD.P2/P3	SDSH_BINARY	P2/P3
DTHD	STEMCOL_BINARY	0.0426	DTHD.STEMCOL_BINARY	0.383919	DTHD.P2/P3	STEMCOL_BINARY	P2/P3
		1	DTHD.DTHD	0	DTHD.P2/P3	DTHD	P2/P3
CUNO	STOLON_BINARY	0.6674	CUNO.STOLON_BINARY	-0.360163	CUNO.P2/P3	STOLON_BINARY	P2/P3
CUNO	PTHT	0.5318	CUNO.PTHT	-0.0799391	CUNO.P2/P3	PTHT	P2/P3
CUNO	PNLG	0.0236	CUNO.PNLG	-0.366888	CUNO.P2/P3	PNLG	P2/P3
CUNO	PNNB	0.306	CUNO.PNNB	0.13757	CUNO.P2/P3	PNNB	P2/P3
CUNO	SEED_S2_BAG	0.9722	CUNO.SEED_S2_BAG	-0.491145	CUNO.P2/P3	SEED_S2_BAG	P2/P3
CUNO	SEED_S2_NONBAG	0.3302	CUNO.SEED_S2_NONBAG	-0.662271	CUNO.P2/P3	SEED_S2_NONBAG	P2/P3
CUNO	SDSH_BINARY	0.101	CUNO.SDSH_BINARY	-0.144345	CUNO.P2/P3	SDSH_BINARY	P2/P3
CUNO	STEMCOL_BINARY	0.1584	CUNO.STEMCOL_BINARY	0.424618	CUNO.P2/P3	STEMCOL_BINARY	P2/P3
CUNO	DTHD	0.9225	CUNO.DTHD	0.583802	CUNO.P2/P3	DTHD	P2/P3
		1	CUNO.CUNO	0	CUNO.P2/P3	CUNO	P2/P3
FLFLG	STOLON_BINARY	0.0796	FLFLG.STOLON_BINARY	-0.143386	FLFLG.P2/P3	STOLON_BINARY	P2/P3
FLFLG	PTHT	0.5276	FLFLG.PTHT	0.227837	FLFLG.P2/P3	PTHT	P2/P3
FLFLG	PNLG	0.9236	FLFLG.PNLG	0.440679	FLFLG.P2/P3	PNLG	P2/P3
FLFLG	PNNB	0.5112	FLFLG.PNNB	-0.339957	FLFLG.P2/P3	PNNB	P2/P3
FLFLG	SEED_S2_BAG	0.0326	FLFLG.SEED_S2_BAG	0.360159	FLFLG.P2/P3	SEED_S2_BAG	P2/P3
FLFLG	SEED_S2_NONBAG	0.0773	FLFLG.SEED_S2_NONBAG	0.215919	FLFLG.P2/P3	SEED_S2_NONBAG	P2/P3
FLFLG	SDSH_BINARY	0.7127	FLFLG.SDSH_BINARY	-0.130785	FLFLG.P2/P3	SDSH_BINARY	P2/P3
FLFLG	STEMCOL_BINARY	0.7842	FLFLG.STEMCOL_BINARY	-0.255167	FLFLG.P2/P3	STEMCOL_BINARY	P2/P3
FLFLG	DTHD	0.4465	FLFLG.DTHD	0.0439819	FLFLG.P2/P3	DTHD	P2/P3
FLFLG	CUNO	0.208	FLFLG.CUNO	-0.302071	FLFLG.P2/P3	CUNO	P2/P3
		1	FLFLG.FLFLG	0	FLFLG.P2/P3	FLFLG	P2/P3
PERICARPCOL_BINARY	STOLON_BINARY	0.735	PERICARPCOL_BINARY.STOLON_BINARY	0.0317208	PERICARPCOL_BINARY.P2/P3	STOLON_BINARY	P2/P3
PERICARPCOL_BINARY	PTHT	0.0774	PERICARPCOL_BINARY.PTHT	-0.055226	PERICARPCOL_BINARY.P2/P3	PTHT	P2/P3
PERICARPCOL_BINARY	PNLG	0.777	PERICARPCOL_BINARY.PNLG	-0.29089	PERICARPCOL_BINARY.P2/P3	PNLG	P2/P3
PERICARPCOL_BINARY	PNNB	0.752	PERICARPCOL_BINARY.PNNB	-0.0798164	PERICARPCOL_BINARY.P2/P3	PNNB	P2/P3
PERICARPCOL_BINARY	SEED_S2_BAG	0.0169	PERICARPCOL_BINARY.SEED_S2_BAG	-0.319639	PERICARPCOL_BINARY.P2/P3	SEED_S2_BAG	P2/P3
PERICARPCOL_BINARY	SEED_S2_NONBAG	0.4256	PERICARPCOL_BINARY.SEED_S2_NONBAG	0.0910895	PERICARPCOL_BINARY.P2/P3	SEED_S2_NONBAG	P2/P3
PERICARPCOL_BINARY	SDSH_BINARY	0.765	PERICARPCOL_BINARY.SDSH_BINARY	0.222235	PERICARPCOL_BINARY.P2/P3	SDSH_BINARY	P2/P3
PERICARPCOL_BINARY	STEMCOL_BINARY	0.111	PERICARPCOL_BINARY.STEMCOL_BINARY	-0.0626815	PERICARPCOL_BINARY.P2/P3	STEMCOL_BINARY	P2/P3
PERICARPCOL_BINARY	DTHD	0.999	PERICARPCOL_BINARY.DTHD	-0.0382654	PERICARPCOL_BINARY.P2/P3	DTHD	P2/P3
PERICARPCOL_BINARY	CUNO	0.2333	PERICARPCOL_BINARY.CUNO	0.135242	PERICARPCOL_BINARY.P2/P3	CUNO	P2/P3
PERICARPCOL_BINARY	FLFLG	0.7894	PERICARPCOL_BINARY.FLFLG	-0.120351	PERICARPCOL_BINARY.P2/P3	FLFLG	P2/P3
		1	PERICARPCOL_BINARY.PERICARPCOL_BINARY	0	PERICARPCOL_BINARY.P2/P3	PERICARPCOL_BINARY	P2/P3
CULM_ANGLE	STOLON_BINARY	0.515	CULM_ANGLE.STOLON_BINARY	-0.3118	CULM_ANGLE.P2/P3	STOLON_BINARY	P2/P3
CULM_ANGLE	PTHT	0.9578	CULM_ANGLE.PTHT	-0.241817	CULM_ANGLE.P2/P3	PTHT	P2/P3
CULM_ANGLE	PNLG	0.9146	CULM_ANGLE.PNLG	-0.168196	CULM_ANGLE.P2/P3	PNLG	P2/P3
CULM_ANGLE	PNNB	0.8556	CULM_ANGLE.PNNB	0.114487	CULM_ANGLE.P2/P3	PNNB	P2/P3
CULM_ANGLE	SEED_S2_BAG	0.1052	CULM_ANGLE.SEED_S2_BAG	-0.53795	CULM_ANGLE.P2/P3	SEED_S2_BAG	P2/P3
CULM_ANGLE	SEED_S2_NONBAG	0.9743	CULM_ANGLE.SEED_S2_NONBAG	-0.141458	CULM_ANGLE.P2/P3	SEED_S2_NONBAG	P2/P3
CULM_ANGLE	SDSH_BINARY	0.1674	CULM_ANGLE.SDSH_BINARY	0.570014	CULM_ANGLE.P2/P3	SDSH_BINARY	P2/P3
CULM_ANGLE	STEMCOL_BINARY	0.0097	CULM_ANGLE.STEMCOL_BINARY	0.634366	CULM_ANGLE.P2/P3	STEMCOL_BINARY	P2/P3
CULM_ANGLE	DTHD	0.208	CULM_ANGLE.DTHD	0.0244561	CULM_ANGLE.P2/P3	DTHD	P2/P3
CULM_ANGLE	CUNO	0.4741	CULM_ANGLE.CUNO	0.251251	CULM_ANGLE.P2/P3	CUNO	P2/P3
CULM_ANGLE	FLFLG	0.0478	CULM_ANGLE.FLFLG	-0.150138	CULM_ANGLE.P2/P3	FLFLG	P2/P3
CULM_ANGLE	PERICARPCOL_BINARY	0.7086	CULM_ANGLE.PERICARPCOL_BINARY	0.230456	CULM_ANGLE.P2/P3	PERICARPCOL_BINARY	P2/P3
		1	CULM_ANGLE.CULM_ANGLE	0	CULM_ANGLE.P2/P3	CULM_ANGLE	P2/P3
AWN_BINARY	STOLON_BINARY	0.6935	AWN_BINARY.STOLON_BINARY	-0.0881909	AWN_BINARY.P2/P3	STOLON_BINARY	P2/P3
AWN_BINARY	PTHT	0.8628	AWN_BINARY.PTHT	-0.0451241	AWN_BINARY.P2/P3	PTHT	P2/P3
AWN_BINARY	PNLG	0.6361	AWN_BINARY.PNLG	-0.121618	AWN_BINARY.P2/P3	PNLG	P2/P3
AWN_BINARY	PNNB	0.368	AWN_BINARY.PNNB	-0.00675288	AWN_BINARY.P2/P3	PNNB	P2/P3
AWN_BINARY	SEED_S2_BAG	0.1084	AWN_BINARY.SEED_S2_BAG	-0.158367	AWN_BINARY.P2/P3	SEED_S2_BAG	P2/P3
AWN_BINARY	SEED_S2_NONBAG	0.6785	AWN_BINARY.SEED_S2_NONBAG	0.367083	AWN_BINARY.P2/P3	SEED_S2_NONBAG	P2/P3
AWN_BINARY	SDSH_BINARY	0.4117	AWN_BINARY.SDSH_BINARY	0.550042	AWN_BINARY.P2/P3	SDSH_BINARY	P2/P3
AWN_BINARY	STEMCOL_BINARY	0.7948	AWN_BINARY.STEMCOL_BINARY	0.00603467	AWN_BINARY.P2/P3	STEMCOL_BINARY	P2/P3
AWN_BINARY	DTHD	0.7787	AWN_BINARY.DTHD	-0.319881	AWN_BINARY.P2/P3	DTHD	P2/P3
AWN_BINARY	CUNO	0.6535	AWN_BINARY.CUNO	-0.223105	AWN_BINARY.P2/P3	CUNO	P2/P3
AWN_BINARY	FLFLG	0.0352	AWN_BINARY.FLFLG	0.342527	AWN_BINARY.P2/P3	FLFLG	P2/P3
AWN_BINARY	PERICARPCOL_BINARY	0.9741	AWN_BINARY.PERICARPCOL_BINARY	0.251907	AWN_BINARY.P2/P3	PERICARPCOL_BINARY	P2/P3
AWN_BINARY	CULM_ANGLE	0.0825	AWN_BINARY.CULM_ANGLE	0.52754	AWN_BINARY.P2/P3	CULM_ANGLE	P2/P3
		1	AWN_BINARY.AWN_BINARY	0	AWN_BINARY.P2/P3	AWN_BINARY	P2/P3
AWNPLU	STOLON_BINARY	0.6707	AWNPLU.STOLON_BINARY	-0.276323	AWNPLU.P2/P3	STOLON_BINARY	P2/P3
AWNPLU	PTHT	0.549	AWNPLU.PTHT	-0.176869	AWNPLU.P2/P3	PTHT	P2/P3
AWNPLU	PNLG	0.7933	AWNPLU.PNLG	-0.200119	AWNPLU.P2/P3	PNLG	P2/P3
AWNPLU	PNNB	0.117	AWNPLU.PNNB	0.235288	AWNPLU.P2/P3	PNNB	P2/P3
AWNPLU	SEED_S2_BAG	0.0831	AWNPLU.SEED_S2_BAG	-0.179367	AWNPLU.P2/P3	SEED_S2_BAG	P2/P3
AWNPLU	SEED_S2_NONBAG	0.4692	AWNPLU.SEED_S2_NONBAG	0.291824	AWNPLU.P2/P3	SEED_S2_NONBAG	P2/P3
AWNPLU	SDSH_BINARY	0.2287	AWNPLU.SDSH_BINARY	0.364082	AWNPLU.P2/P3	SDSH_BINARY	P2/P3
AWNPLU	STEMCOL_BINARY	0.9857	AWNPLU.STEMCOL_BINARY	0.209773	AWNPLU.P2/P3	STEMCOL_BINARY	P2/P3
AWNPLU	DTHD	0.6589	AWNPLU.DTHD	-0.186887	AWNPLU.P2/P3	DTHD	P2/P3
AWNPLU	CUNO	0.8596	AWNPLU.CUNO	0.010792	AWNPLU.P2/P3	CUNO	P2/P3
AWNPLU	FLFLG	0.1609	AWNPLU.FLFLG	0.124956	AWNPLU.P2/P3	FLFLG	P2/P3
AWNPLU	PERICARPCOL_BINARY	0.4919	AWNPLU.PERICARPCOL_BINARY	0.239819	AWNPLU.P2/P3	PERICARPCOL_BINARY	P2/P3
AWNPLU	CULM_ANGLE	0.02	AWNPLU.CULM_ANGLE	0.754578	AWNPLU.P2/P3	CULM_ANGLE	P2/P3
AWNPLU	AWN_BINARY	0.5091	AWNPLU.AWN_BINARY	0.765881	AWNPLU.P2/P3	AWN_BINARY	P2/P3
		1	AWNPLU.AWNPLU	0	AWNPLU.P2/P3	AWNPLU	P2/P3
HULCL	STOLON_BINARY	0.3494	HULCL.STOLON_BINARY	-0.0528789	HULCL.P2/P3	STOLON_BINARY	P2/P3
HULCL	PTHT	0.9118	HULCL.PTHT	-0.0964013	HULCL.P2/P3	PTHT	P2/P3
HULCL	PNLG	0.1873	HULCL.PNLG	-0.304579	HULCL.P2/P3	PNLG	P2/P3
HULCL	PNNB	0.891	HULCL.PNNB	0.265424	HULCL.P2/P3	PNNB	P2/P3
HULCL	SEED_S2_BAG	0.2823	HULCL.SEED_S2_BAG	-0.0295694	HULCL.P2/P3	SEED_S2_BAG	P2/P3
HULCL	SEED_S2_NONBAG	0.6355	HULCL.SEED_S2_NONBAG	0.378742	HULCL.P2/P3	SEED_S2_NONBAG	P2/P3
HULCL	SDSH_BINARY	0.3345	HULCL.SDSH_BINARY	0.322665	HULCL.P2/P3	SDSH_BINARY	P2/P3
HULCL	STEMCOL_BINARY	0.948	HULCL.STEMCOL_BINARY	0.0473986	HULCL.P2/P3	STEMCOL_BINARY	P2/P3
HULCL	DTHD	0.9615	HULCL.DTHD	-0.194453	HULCL.P2/P3	DTHD	P2/P3
HULCL	CUNO	0.8688	HULCL.CUNO	0.0266811	HULCL.P2/P3	CUNO	P2/P3
HULCL	FLFLG	0.0048	HULCL.FLFLG	0.211436	HULCL.P2/P3	FLFLG	P2/P3
HULCL	PERICARPCOL_BINARY	0.9927	HULCL.PERICARPCOL_BINARY	0.279667	HULCL.P2/P3	PERICARPCOL_BINARY	P2/P3
HULCL	CULM_ANGLE	0.1179	HULCL.CULM_ANGLE	0.486567	HULCL.P2/P3	CULM_ANGLE	P2/P3
HULCL	AWN_BINARY	0.0673	HULCL.AWN_BINARY	0.808801	HULCL.P2/P3	AWN_BINARY	P2/P3
HULCL	AWNPLU	0.099	HULCL.AWNPLU	0.779309	HULCL.P2/P3	AWNPLU	P2/P3
		1	HULCL.HULCL	0	HULCL.P2/P3	HULCL	P2/P3
PTHT	STOLON_BINARY	0.4505	PTHT.STOLON_BINARY	0.518927	PTHT.P4	STOLON_BINARY	P4
PNLG	STOLON_BINARY	0.0883	PNLG.STOLON_BINARY	0.425946	PNLG.P4	STOLON_BINARY	P4
PNLG	PTHT	0.2892	PNLG.PTHT	0.632792	PNLG.P4	PTHT	P4
PNNB	STOLON_BINARY	0.4092	PNNB.STOLON_BINARY	-0.169528	PNNB.P4	STOLON_BINARY	P4
PNNB	PTHT	0.6083	PNNB.PTHT	-0.0383855	PNNB.P4	PTHT	P4
PNNB	PNLG	0.8084	PNNB.PNLG	-0.0866459	PNNB.P4	PNLG	P4
SEED_S2_BAG	STOLON_BINARY	0.31	SEED_S2_BAG.STOLON_BINARY	-0.22883	SEED_S2_BAG.P4	STOLON_BINARY	P4
SEED_S2_BAG	PTHT	0.2292	SEED_S2_BAG.PTHT	-0.118899	SEED_S2_BAG.P4	PTHT	P4
SEED_S2_BAG	PNLG	0.0057	SEED_S2_BAG.PNLG	-0.333772	SEED_S2_BAG.P4	PNLG	P4
SEED_S2_BAG	PNNB	0.0035	SEED_S2_BAG.PNNB	0.5521	SEED_S2_BAG.P4	PNNB	P4
SEED_S2_NONBAG	STOLON_BINARY	0.2624	SEED_S2_NONBAG.STOLON_BINARY	0.109348	SEED_S2_NONBAG.P4	STOLON_BINARY	P4
SEED_S2_NONBAG	PTHT	0.7724	SEED_S2_NONBAG.PTHT	-0.100729	SEED_S2_NONBAG.P4	PTHT	P4
SEED_S2_NONBAG	PNLG	0.5576	SEED_S2_NONBAG.PNLG	-0.174478	SEED_S2_NONBAG.P4	PNLG	P4
SEED_S2_NONBAG	PNNB	0.0276	SEED_S2_NONBAG.PNNB	0.66013	SEED_S2_NONBAG.P4	PNNB	P4
SEED_S2_NONBAG	SEED_S2_BAG	0.2252	SEED_S2_NONBAG.SEED_S2_BAG	0.672828	SEED_S2_NONBAG.P4	SEED_S2_BAG	P4
SDSH_BINARY	STOLON_BINARY	0.8957	SDSH_BINARY.STOLON_BINARY	-0.261419	SDSH_BINARY.P4	STOLON_BINARY	P4
SDSH_BINARY	PTHT	0.2622	SDSH_BINARY.PTHT	-0.294544	SDSH_BINARY.P4	PTHT	P4
SDSH_BINARY	PNLG	0.0269	SDSH_BINARY.PNLG	-0.415852	SDSH_BINARY.P4	PNLG	P4
SDSH_BINARY	PNNB	0.9746	SDSH_BINARY.PNNB	-0.0231016	SDSH_BINARY.P4	PNNB	P4
SDSH_BINARY	SEED_S2_BAG	0.0155	SDSH_BINARY.SEED_S2_BAG	0.0600518	SDSH_BINARY.P4	SEED_S2_BAG	P4
SDSH_BINARY	SEED_S2_NONBAG	0.5427	SDSH_BINARY.SEED_S2_NONBAG	-0.00967193	SDSH_BINARY.P4	SEED_S2_NONBAG	P4
STEMCOL_BINARY	STOLON_BINARY	0.0113	STEMCOL_BINARY.STOLON_BINARY	-0.62609	STEMCOL_BINARY.P4	STOLON_BINARY	P4
STEMCOL_BINARY	PTHT	0.1215	STEMCOL_BINARY.PTHT	-0.539235	STEMCOL_BINARY.P4	PTHT	P4
STEMCOL_BINARY	PNLG	0.1753	STEMCOL_BINARY.PNLG	-0.455481	STEMCOL_BINARY.P4	PNLG	P4
STEMCOL_BINARY	PNNB	0.3596	STEMCOL_BINARY.PNNB	-0.0407391	STEMCOL_BINARY.P4	PNNB	P4
STEMCOL_BINARY	SEED_S2_BAG	0.0386	STEMCOL_BINARY.SEED_S2_BAG	0.160175	STEMCOL_BINARY.P4	SEED_S2_BAG	P4
STEMCOL_BINARY	SEED_S2_NONBAG	0.0744	STEMCOL_BINARY.SEED_S2_NONBAG	-0.141153	STEMCOL_BINARY.P4	SEED_S2_NONBAG	P4
STEMCOL_BINARY	SDSH_BINARY	0.4924	STEMCOL_BINARY.SDSH_BINARY	0.472354	STEMCOL_BINARY.P4	SDSH_BINARY	P4
DTHD	STOLON_BINARY	0.6075	DTHD.STOLON_BINARY	-0.0453756	DTHD.P4	STOLON_BINARY	P4
DTHD	PTHT	0.8479	DTHD.PTHT	-0.127225	DTHD.P4	PTHT	P4
DTHD	PNLG	0.868	DTHD.PNLG	0.132659	DTHD.P4	PNLG	P4
DTHD	PNNB	0.84	DTHD.PNNB	-0.539809	DTHD.P4	PNNB	P4
DTHD	SEED_S2_BAG	0.0648	DTHD.SEED_S2_BAG	-0.594118	DTHD.P4	SEED_S2_BAG	P4
DTHD	SEED_S2_NONBAG	0.9302	DTHD.SEED_S2_NONBAG	-0.622872	DTHD.P4	SEED_S2_NONBAG	P4
DTHD	SDSH_BINARY	0.0275	DTHD.SDSH_BINARY	0.225024	DTHD.P4	SDSH_BINARY	P4
DTHD	STEMCOL_BINARY	0.0426	DTHD.STEMCOL_BINARY	0.09756	DTHD.P4	STEMCOL_BINARY	P4
CUNO	STOLON_BINARY	0.6674	CUNO.STOLON_BINARY	-0.123176	CUNO.P4	STOLON_BINARY	P4
CUNO	PTHT	0.5318	CUNO.PTHT	-0.0573383	CUNO.P4	PTHT	P4
CUNO	PNLG	0.0236	CUNO.PNLG	0.312763	CUNO.P4	PNLG	P4
CUNO	PNNB	0.306	CUNO.PNNB	-0.00162413	CUNO.P4	PNNB	P4
CUNO	SEED_S2_BAG	0.9722	CUNO.SEED_S2_BAG	-0.49799	CUNO.P4	SEED_S2_BAG	P4
CUNO	SEED_S2_NONBAG	0.3302	CUNO.SEED_S2_NONBAG	-0.350094	CUNO.P4	SEED_S2_NONBAG	P4
CUNO	SDSH_BINARY	0.101	CUNO.SDSH_BINARY	0.158742	CUNO.P4	SDSH_BINARY	P4
CUNO	STEMCOL_BINARY	0.1584	CUNO.STEMCOL_BINARY	-0.013262	CUNO.P4	STEMCOL_BINARY	P4
CUNO	DTHD	0.9225	CUNO.DTHD	0.6554	CUNO.P4	DTHD	P4
FLFLG	STOLON_BINARY	0.0796	FLFLG.STOLON_BINARY	0.189549	FLFLG.P4	STOLON_BINARY	P4
FLFLG	PTHT	0.5276	FLFLG.PTHT	0.174079	FLFLG.P4	PTHT	P4
FLFLG	PNLG	0.9236	FLFLG.PNLG	0.341854	FLFLG.P4	PNLG	P4
FLFLG	PNNB	0.5112	FLFLG.PNNB	-0.508329	FLFLG.P4	PNNB	P4
FLFLG	SEED_S2_BAG	0.0326	FLFLG.SEED_S2_BAG	-0.310423	FLFLG.P4	SEED_S2_BAG	P4
FLFLG	SEED_S2_NONBAG	0.0773	FLFLG.SEED_S2_NONBAG	-0.373902	FLFLG.P4	SEED_S2_NONBAG	P4
FLFLG	SDSH_BINARY	0.7127	FLFLG.SDSH_BINARY	-0.139122	FLFLG.P4	SDSH_BINARY	P4
FLFLG	STEMCOL_BINARY	0.7842	FLFLG.STEMCOL_BINARY	-0.184346	FLFLG.P4	STEMCOL_BINARY	P4
FLFLG	DTHD	0.4465	FLFLG.DTHD	0.155917	FLFLG.P4	DTHD	P4
FLFLG	CUNO	0.208	FLFLG.CUNO	-0.112184	FLFLG.P4	CUNO	P4
PERICARPCOL_BINARY	STOLON_BINARY	0.735	PERICARPCOL_BINARY.STOLON_BINARY	-0.191529	PERICARPCOL_BINARY.P4	STOLON_BINARY	P4
PERICARPCOL_BINARY	PTHT	0.0774	PERICARPCOL_BINARY.PTHT	-0.406434	PERICARPCOL_BINARY.P4	PTHT	P4
PERICARPCOL_BINARY	PNLG	0.777	PERICARPCOL_BINARY.PNLG	-0.154796	PERICARPCOL_BINARY.P4	PNLG	P4
PERICARPCOL_BINARY	PNNB	0.752	PERICARPCOL_BINARY.PNNB	0.100163	PERICARPCOL_BINARY.P4	PNNB	P4
PERICARPCOL_BINARY	SEED_S2_BAG	0.0169	PERICARPCOL_BINARY.SEED_S2_BAG	0.315608	PERICARPCOL_BINARY.P4	SEED_S2_BAG	P4
PERICARPCOL_BINARY	SEED_S2_NONBAG	0.4256	PERICARPCOL_BINARY.SEED_S2_NONBAG	0.117376	PERICARPCOL_BINARY.P4	SEED_S2_NONBAG	P4
PERICARPCOL_BINARY	SDSH_BINARY	0.765	PERICARPCOL_BINARY.SDSH_BINARY	-0.0709478	PERICARPCOL_BINARY.P4	SDSH_BINARY	P4
PERICARPCOL_BINARY	STEMCOL_BINARY	0.111	PERICARPCOL_BINARY.STEMCOL_BINARY	0.482062	PERICARPCOL_BINARY.P4	STEMCOL_BINARY	P4
PERICARPCOL_BINARY	DTHD	0.999	PERICARPCOL_BINARY.DTHD	-0.0246601	PERICARPCOL_BINARY.P4	DTHD	P4
PERICARPCOL_BINARY	CUNO	0.2333	PERICARPCOL_BINARY.CUNO	-0.180757	PERICARPCOL_BINARY.P4	CUNO	P4
PERICARPCOL_BINARY	FLFLG	0.7894	PERICARPCOL_BINARY.FLFLG	-0.0958306	PERICARPCOL_BINARY.P4	FLFLG	P4
CULM_ANGLE	STOLON_BINARY	0.515	CULM_ANGLE.STOLON_BINARY	-0.271937	CULM_ANGLE.P4	STOLON_BINARY	P4
CULM_ANGLE	PTHT	0.9578	CULM_ANGLE.PTHT	-0.274991	CULM_ANGLE.P4	PTHT	P4
CULM_ANGLE	PNLG	0.9146	CULM_ANGLE.PNLG	-0.105503	CULM_ANGLE.P4	PNLG	P4
CULM_ANGLE	PNNB	0.8556	CULM_ANGLE.PNNB	0.181272	CULM_ANGLE.P4	PNNB	P4
CULM_ANGLE	SEED_S2_BAG	0.1052	CULM_ANGLE.SEED_S2_BAG	-0.045385	CULM_ANGLE.P4	SEED_S2_BAG	P4
CULM_ANGLE	SEED_S2_NONBAG	0.9743	CULM_ANGLE.SEED_S2_NONBAG	-0.0934559	CULM_ANGLE.P4	SEED_S2_NONBAG	P4
CULM_ANGLE	SDSH_BINARY	0.1674	CULM_ANGLE.SDSH_BINARY	0.127022	CULM_ANGLE.P4	SDSH_BINARY	P4
CULM_ANGLE	STEMCOL_BINARY	0.0097	CULM_ANGLE.STEMCOL_BINARY	0.325327	CULM_ANGLE.P4	STEMCOL_BINARY	P4
CULM_ANGLE	DTHD	0.208	CULM_ANGLE.DTHD	0.493169	CULM_ANGLE.P4	DTHD	P4
CULM_ANGLE	CUNO	0.4741	CULM_ANGLE.CUNO	0.491002	CULM_ANGLE.P4	CUNO	P4
CULM_ANGLE	FLFLG	0.0478	CULM_ANGLE.FLFLG	-0.395602	CULM_ANGLE.P4	FLFLG	P4
CULM_ANGLE	PERICARPCOL_BINARY	0.7086	CULM_ANGLE.PERICARPCOL_BINARY	0.396405	CULM_ANGLE.P4	PERICARPCOL_BINARY	P4
AWN_BINARY	STOLON_BINARY	0.6935	AWN_BINARY.STOLON_BINARY	-0.319899	AWN_BINARY.P4	STOLON_BINARY	P4
AWN_BINARY	PTHT	0.8628	AWN_BINARY.PTHT	-0.173567	AWN_BINARY.P4	PTHT	P4
AWN_BINARY	PNLG	0.6361	AWN_BINARY.PNLG	-0.331816	AWN_BINARY.P4	PNLG	P4
AWN_BINARY	PNNB	0.368	AWN_BINARY.PNNB	0.422116	AWN_BINARY.P4	PNNB	P4
AWN_BINARY	SEED_S2_BAG	0.1084	AWN_BINARY.SEED_S2_BAG	0.494787	AWN_BINARY.P4	SEED_S2_BAG	P4
AWN_BINARY	SEED_S2_NONBAG	0.6785	AWN_BINARY.SEED_S2_NONBAG	0.386087	AWN_BINARY.P4	SEED_S2_NONBAG	P4
AWN_BINARY	SDSH_BINARY	0.4117	AWN_BINARY.SDSH_BINARY	0.363948	AWN_BINARY.P4	SDSH_BINARY	P4
AWN_BINARY	STEMCOL_BINARY	0.7948	AWN_BINARY.STEMCOL_BINARY	0.204181	AWN_BINARY.P4	STEMCOL_BINARY	P4
AWN_BINARY	DTHD	0.7787	AWN_BINARY.DTHD	-0.324325	AWN_BINARY.P4	DTHD	P4
AWN_BINARY	CUNO	0.6535	AWN_BINARY.CUNO	-0.211593	AWN_BINARY.P4	CUNO	P4
AWN_BINARY	FLFLG	0.0352	AWN_BINARY.FLFLG	-0.202435	AWN_BINARY.P4	FLFLG	P4
AWN_BINARY	PERICARPCOL_BINARY	0.9741	AWN_BINARY.PERICARPCOL_BINARY	0.327071	AWN_BINARY.P4	PERICARPCOL_BINARY	P4
AWN_BINARY	CULM_ANGLE	0.0825	AWN_BINARY.CULM_ANGLE	0.0480174	AWN_BINARY.P4	CULM_ANGLE	P4
AWNPLU	STOLON_BINARY	0.6707	AWNPLU.STOLON_BINARY	-0.439209	AWNPLU.P4	STOLON_BINARY	P4
AWNPLU	PTHT	0.549	AWNPLU.PTHT	-0.243198	AWNPLU.P4	PTHT	P4
AWNPLU	PNLG	0.7933	AWNPLU.PNLG	-0.165385	AWNPLU.P4	PNLG	P4
AWNPLU	PNNB	0.117	AWNPLU.PNNB	0.518406	AWNPLU.P4	PNNB	P4
AWNPLU	SEED_S2_BAG	0.0831	AWNPLU.SEED_S2_BAG	0.426716	AWNPLU.P4	SEED_S2_BAG	P4
AWNPLU	SEED_S2_NONBAG	0.4692	AWNPLU.SEED_S2_NONBAG	0.328466	AWNPLU.P4	SEED_S2_NONBAG	P4
AWNPLU	SDSH_BINARY	0.2287	AWNPLU.SDSH_BINARY	-0.223158	AWNPLU.P4	SDSH_BINARY	P4
AWNPLU	STEMCOL_BINARY	0.9857	AWNPLU.STEMCOL_BINARY	0.169131	AWNPLU.P4	STEMCOL_BINARY	P4
AWNPLU	DTHD	0.6589	AWNPLU.DTHD	-0.306436	AWNPLU.P4	DTHD	P4
AWNPLU	CUNO	0.8596	AWNPLU.CUNO	-0.134866	AWNPLU.P4	CUNO	P4
AWNPLU	FLFLG	0.1609	AWNPLU.FLFLG	-0.217307	AWNPLU.P4	FLFLG	P4
AWNPLU	PERICARPCOL_BINARY	0.4919	AWNPLU.PERICARPCOL_BINARY	0.536545	AWNPLU.P4	PERICARPCOL_BINARY	P4
AWNPLU	CULM_ANGLE	0.02	AWNPLU.CULM_ANGLE	0.236375	AWNPLU.P4	CULM_ANGLE	P4
AWNPLU	AWN_BINARY	0.5091	AWNPLU.AWN_BINARY	0.602146	AWNPLU.P4	AWN_BINARY	P4
HULCL	STOLON_BINARY	0.3494	HULCL.STOLON_BINARY	0.042212	HULCL.P4	STOLON_BINARY	P4
HULCL	PTHT	0.9118	HULCL.PTHT	0.0252121	HULCL.P4	PTHT	P4
HULCL	PNLG	0.1873	HULCL.PNLG	0.00020521	HULCL.P4	PNLG	P4
HULCL	PNNB	0.891	HULCL.PNNB	0.2784	HULCL.P4	PNNB	P4
HULCL	SEED_S2_BAG	0.2823	HULCL.SEED_S2_BAG	0.355943	HULCL.P4	SEED_S2_BAG	P4
HULCL	SEED_S2_NONBAG	0.6355	HULCL.SEED_S2_NONBAG	0.16096	HULCL.P4	SEED_S2_NONBAG	P4
HULCL	SDSH_BINARY	0.3345	HULCL.SDSH_BINARY	-0.129644	HULCL.P4	SDSH_BINARY	P4
HULCL	STEMCOL_BINARY	0.948	HULCL.STEMCOL_BINARY	-0.0460614	HULCL.P4	STEMCOL_BINARY	P4
HULCL	DTHD	0.9615	HULCL.DTHD	-0.236452	HULCL.P4	DTHD	P4
HULCL	CUNO	0.8688	HULCL.CUNO	-0.0712639	HULCL.P4	CUNO	P4
HULCL	FLFLG	0.0048	HULCL.FLFLG	-0.407689	HULCL.P4	FLFLG	P4
HULCL	PERICARPCOL_BINARY	0.9927	HULCL.PERICARPCOL_BINARY	0.307571	HULCL.P4	PERICARPCOL_BINARY	P4
HULCL	CULM_ANGLE	0.1179	HULCL.CULM_ANGLE	0.0904898	HULCL.P4	CULM_ANGLE	P4
HULCL	AWN_BINARY	0.0673	HULCL.AWN_BINARY	0.320312	HULCL.P4	AWN_BINARY	P4
HULCL	AWNPLU	0.099	HULCL.AWNPLU	0.376021	HULCL.P4	AWNPLU	P4

## Sheet: TraitAcronym
Planteome acronym	Descriptive trait name	IRRI acronym (International Rice Research Institute)	DB acronym (Dale Bumpers National Rice Research Center)	CU acronym (Cornell University)
ANTLT	Anther length	ANTLT
AWNLG	Awn length	AWNLT
AWNPLU	Awn presence		AWNPLU	AWNPLU
AWNPLU	Awn presence		AWN_BINARY	AWN_BINARY
AWNPLU_Binary	Awn presence	AWNPR
AWNWD	Awn width	AWNWD
BLSCO	Basal sheath color	BLSCO		STEMCOL_BINARY
COLLCOL	Collar color	COLLCO
CUDI	Culm diameter	CUDI
CUKNEE	Culm kneeing ability	CUKNAB
CULMHAB	Culm habit	CUHABIT	CULM_ANGLE	CULM_ANGLE
CULMHAB_VEG	Growth habit	CUHABIT_VEG
CULT	Culm length	CULT
CUNO	Number of culms per plant	CUNO		CUNO
DTHD	Days to 50% heading	DTHD	DTHD	DTHD
FILGRNB	No. of total seeds		HULGRCO
FILGRNB_Bag	Seed count of single bag panicle			SEED_S2_BAG
FILGRNB_NonBag	Seed from all remaining panicles that were not bagged			SEED_S2_NONBAG
FLFLG	Flag leaf length	FLFLG	FLFLG	FLFLG
FLFLWD	Flag leaf lamina width	FLFWD	FLFLWD
HULCL	Hull color			HULCL
HULGRLG	Seed length		HULGRLG
HULGRSURFAR	Seed surface area		HULGRSURFAR
HULGRVOL	Seed volume		HULGRVOL
HULGRWD	Seed width		HULGRWD
INFLBRACL	Panicle branches and axis color	PANCO
LFAG	Flag leaf attitude	FLAGATT
LfBladAnth	Leaf blade anthocyanin color	LBAC
LfBladGreen	Leaf blade intensity of green color	LBIGC
LFLPUBES	Leaf blade pubesence on blade surface	LBPBS
LIFECYCHAB	Life cycle	LIFE
LIGLG	Ligule length	LIGLT
LSEN	Leaf senescence	LEAF
MALEST	Male sterility	MAST
Pan2ndBr	Panicle secondary branching	PAN2BR
PanAxAtt	Panicle attitude of primary branches	PAMB
PanBasBrDist	Distance of nearest spikelet to the panicle base	DIST
PanBrArr	Panicle arrangement of primary branches	PANBR
PANEXS	Panicle exsertion	PANEXS
PANTYP	Panicle type	PANTYPE
PBRNB	Panicle branch number	PANBASE	PBRNB
PENLFLG	Penultimate (2nd) leaf length	2LLT
PENLFLWD	Penultimate (2nd) leaf width	2LWD
PericCol_Binary	Color of the dehulled grain (pericarp color)			PERICARPCOL_BINARY
PNLG	Panicle length	PNLG	PNLG	PNLG
PNNB	Number of panicles per plant	PNNB	PNNB	PNNB
PTHT	Plant height		PTHT	PTHT
RHIFOR	Rhizome and stolon formation	STOLON	STOLON_BINARY	STOLON_BINARY
SDSH	Seed shattering		SDSH_BINARY	SDSH_BINARY
SPKFRT	Panicle fertility	FERT
SPKLG	Spikelet length	SPKLT
SPKWD	Spikelet width	SPKWD
STIGLG	Stigma length	STGLT
STLEMLG	Sterile lemma length	STLLT
STLEMWD	Sterile lemma width	STLWD
STYLLG	Style length	STYLT
UNFILGRNB	Number of empty spikelets per panicle	UNFILLED	UNFILGRNB
