# Supplementary material for: Phenotypic Variation and the Impact of Admixture in the Oryza rufipogon Species Complex (ORSC)
Source: Frontiers journal article supplement (doi:10.3389/fpls.2022.787703), 2022-06-13
Supplement: Table_1.pdf [file Table_1.pdf]

**Supplementary Table 1:** Summary of *O. rufipogon*, *O. nivara* and *O. sativa* habitat preferences, geographic range, and morphological traits. [Edited from Jung (2016) and Kim (2016)]

| Trait                                                | <i>Oryza species</i>                                                                                         |                                                                                                                        |                                                           |
|------------------------------------------------------|--------------------------------------------------------------------------------------------------------------|------------------------------------------------------------------------------------------------------------------------|-----------------------------------------------------------|
|                                                      | <i>O. rufipogon</i>                                                                                          | <i>O. nivara</i>                                                                                                       | <i>O. sativa</i>                                          |
| Life habit <sup>1</sup>                              | Perennial                                                                                                    | Annual                                                                                                                 | Annual                                                    |
| Habitat <sup>2</sup>                                 | Deepwater/aquatic, swamps/marshes, rice fields, moderately deep water, prefers clay/loam soil and black soil | Seasonally dry, swamps, pond/stream/field banks                                                                        | Dry and wetland fields, deep water up to 4m, floating >4m |
| Geographic range <sup>2</sup>                        | Tropical Asia to Australia <sup>2</sup>                                                                      | Drier regions of S/SE Asia                                                                                             | Worldwide                                                 |
| Photoperiod response                                 | Sensitive                                                                                                    | Usually insensitive                                                                                                    | Sensitive                                                 |
| Plant type <sup>2</sup>                              | Decumbent or floating, tufted and spreading/scrambling                                                       | Semi-erect to decumbent                                                                                                |                                                           |
| Lateral meristem formation/nodal tillering           | Present                                                                                                      |                                                                                                                        | Absent                                                    |
| Horizontal stems                                     | Present                                                                                                      | Absent                                                                                                                 | Absent                                                    |
| Regeneration ability of stem segments <sup>6,7</sup> | Mod-high; mod-high (1.51-2.50 ave. in 0-3 scale)                                                             | Mostly low; low (0.07-0.33 ave. in 0-3 scale)                                                                          | Low-moderatelyhigh                                        |
| Plant height                                         | Tall, ~150cm ave. <sup>5</sup> ; culm length: 234-293cm <sup>7</sup>                                         | Short to intermediate(usu. <2m) <sup>2</sup> ; short (ave. 84 cm) <sup>5</sup> ; Culm length: 127-151.7cm <sup>7</sup> |                                                           |
| Internodes                                           | Long                                                                                                         |                                                                                                                        |                                                           |
| Ligule                                               | 2.07 cm ave. length <sup>5</sup>                                                                             | 1.19 cm ave. length <sup>5</sup>                                                                                       | 1.71 cm ave. length <sup>5</sup>                          |
| Characteristics at end of growing season             | Dried productive tillers, green tillers present that will flower next season                                 | All tillers are productive, all dried                                                                                  |                                                           |
| Stolons                                              | Sometimes                                                                                                    | None                                                                                                                   | None                                                      |
| Roots                                                | Perennial root stock, adventitious roots                                                                     |                                                                                                                        |                                                           |

| Trait                                                         | <i>Oryza species</i>                                                                            |                                                                                                        |                                                                                 |
|---------------------------------------------------------------|-------------------------------------------------------------------------------------------------|--------------------------------------------------------------------------------------------------------|---------------------------------------------------------------------------------|
|                                                               | <i>O. rufipogon</i>                                                                             | <i>O. nivara</i>                                                                                       | <i>O. sativa</i>                                                                |
| Days to heading <sup>7</sup>                                  | Longer (137-146 d ave.)                                                                         | Shorter (112-145 d ave.)                                                                               |                                                                                 |
| Panicle number <sup>7</sup>                                   | Lower (3.3-8.5 ave.)                                                                            | Higher (10.4-14.5 ave.)                                                                                |                                                                                 |
| Panicle length <sup>5</sup>                                   | Ave. 21.3cm                                                                                     | Ave. 13.3cm                                                                                            | Ave. 21.8cm                                                                     |
| Panicle exertion                                              | Well exerted                                                                                    | Inserted or not well exerted/ partially exerted                                                        |                                                                                 |
| Panicle shape                                                 | Spreading, open                                                                                 | Semi-open                                                                                              | Erect, compact                                                                  |
| Panicle branching <sup>5</sup>                                | Ave. 7.2 primary branches/panicle                                                               | Few secondary and tertiary branches; ave.5.06 primary branches/panicle                                 | Secondary branching; ave. 10.2 primary branches/panicle                         |
| Spikelet dimensions                                           | Usually 8-9 mm L <sup>2</sup> ; ave. 8.13 mm L, 2.27mm W <sup>5</sup>                           | Large - 6-8.4mm L, 1.9-3.0 mm W, 1.2-2.0 mm thick, ave. <sup>2</sup> ; 8.14L, 2.56 W ave. <sup>5</sup> | Usually 4-8.5mm L, 2-4 mm W <sup>2</sup> ; ave. 8.03mm L, 3.05mm W <sup>5</sup> |
| Spikelets/panicle                                             | Ave. 63.45                                                                                      | Ave. 39.35                                                                                             | Ave. 113.95                                                                     |
| Spikelet fertility                                            | May be low                                                                                      | High                                                                                                   |                                                                                 |
| Time between spikelet opening and pollenemission <sup>6</sup> | Longer: ~2-6 min                                                                                | Short: ~1-2 min                                                                                        | Short: immediately-30 sec                                                       |
| Awns                                                          | Long - 5-11cm <sup>2</sup> ; ave. 5.87 <sup>5</sup>                                             | Long/strong (4-10cm) <sup>2</sup> ; 6.91 cm ave. <sup>5</sup>                                          | Short-none <sup>2</sup> ; ave. 0.72cm <sup>5</sup>                              |
| Anthers                                                       | >3mm L to >7; indehiscent,pendant; 4.88 mm ave. L <sup>5</sup> ; 4.79-5.07 cm ave. <sup>7</sup> | <2.5mm; immd. dehiscent, upright; 2.82 mm ave. L <sup>5</sup> ; 2.10-2.21 cm ave. <sup>7</sup>         | Usually <2.1 mm L <sup>2</sup> ; 2.51 mm ave. <sup>5</sup>                      |
| Embryo size                                                   | Usually 1-1.5 mm long                                                                           | Usually 1-1.5 mm long                                                                                  | Usually <2.1 mm long                                                            |
| Synchronicity of seed maturation                              | Asynchronous                                                                                    | Asynchronous                                                                                           | Synchronous                                                                     |
| Shattering <sup>2</sup>                                       | Highly shattering                                                                               | Highly shattering                                                                                      | Non-shattering                                                                  |
| Seed production                                               | Low                                                                                             | High                                                                                                   | High                                                                            |
| Seed dormancy                                                 | Mod-mod high <sup>6</sup>                                                                       | Mod-high <sup>6</sup> , strong <sup>2</sup>                                                            | Low <sup>6</sup>                                                                |

- <sup>1</sup> Vaughan DA, Morishima H, Kadowaki K (2003). Diversity in the *Oryza* genus. *Current Opinion in Plant Biology* 6: 139–146.
- <sup>2</sup> Vaughan DA (1994) *The Wild Relatives of Rice: A Genetic Resources Handbook*, IRRI, Philippines
- <sup>3</sup> Grillo MA, Li C, Fowlkes AM, Briggeman TM, Zhou A, Schemske DW, Sang T (2009) Genetic architecture for the adaptive origin of annual wild rice, *O. nivara*. *Evolution* 63:870-883.  
(Individuals in study chosen based on characteristics displayed under greenhouse growing conditions.)
- <sup>4</sup> Li C, Zhou A, Sang T (2005) Genetic analysis of rice domestication syndrome with the wild annual species, *O. nivara*. *New Phytologist* 170:185-193.
- <sup>5</sup> Morishima H, Oka HI, Chang WT (1961) Directions of differentiation in populations of wild rice, *Oryza perennis* and *O. sativa f. spontanea*. *Evolution* 15: 326-339.  
*O. perennis* traits entered here as *O. rufipogon* and *O. sativa f. spontanea* as *O. nivara*
- <sup>6</sup> Oka HI, Morishima H (1967) Variations in the breeding system of a wild rice *O. perennis*. *Evolution* 21:249-258.  
*O. perennis* (Asian race); *perennis* type entered as *O. rufipogon* and *O. perennis* Asian race, *spontanea* type entered as *O. nivara*
- <sup>7</sup> Barbier P (1989a) Genetic variation and ecotypic differentiation in the wild rice species *Oryza rufipogon*. I. Population differentiation in life-history traits and isozymic loci. *Japanese Journal Genetics* 64:259-271.
