# Supplementary figures and images for: Phenotypic Variation and the Impact of Admixture in the Oryza rufipogon Species Complex (ORSC)
Source: Frontiers journal article supplement (doi:10.3389/fpls.2022.787703), 2022-06-13

correlation

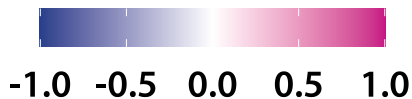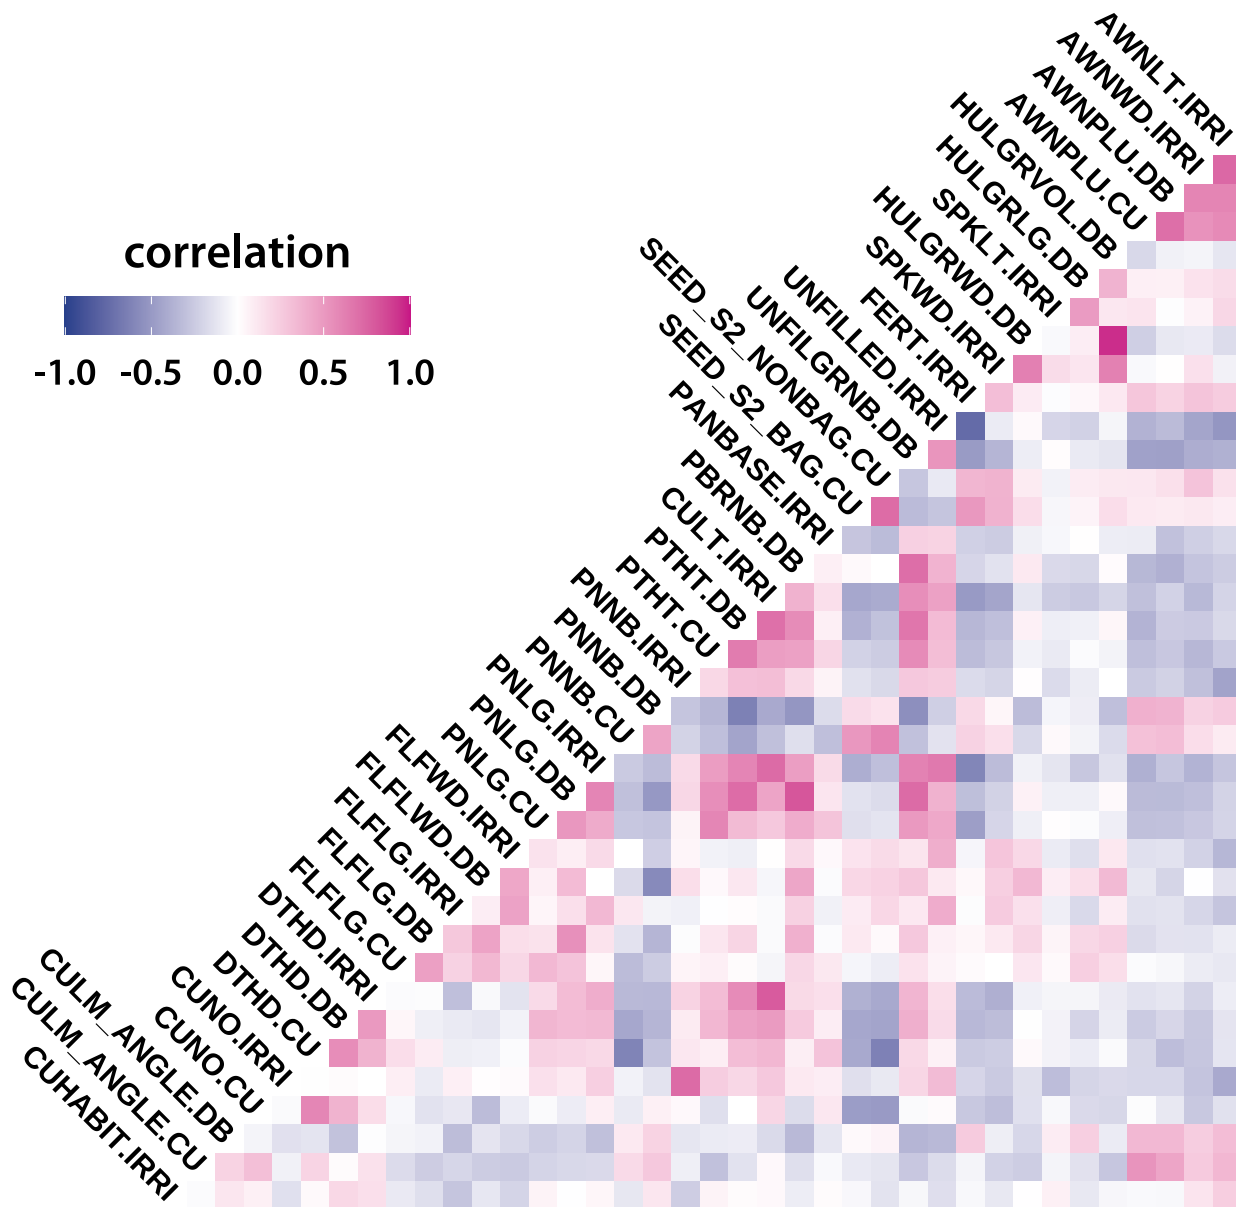

Supplement: Data_Sheet_1.ZIP [file commonTraitCorALL.pdf › commonTraitCorALL.pdf]

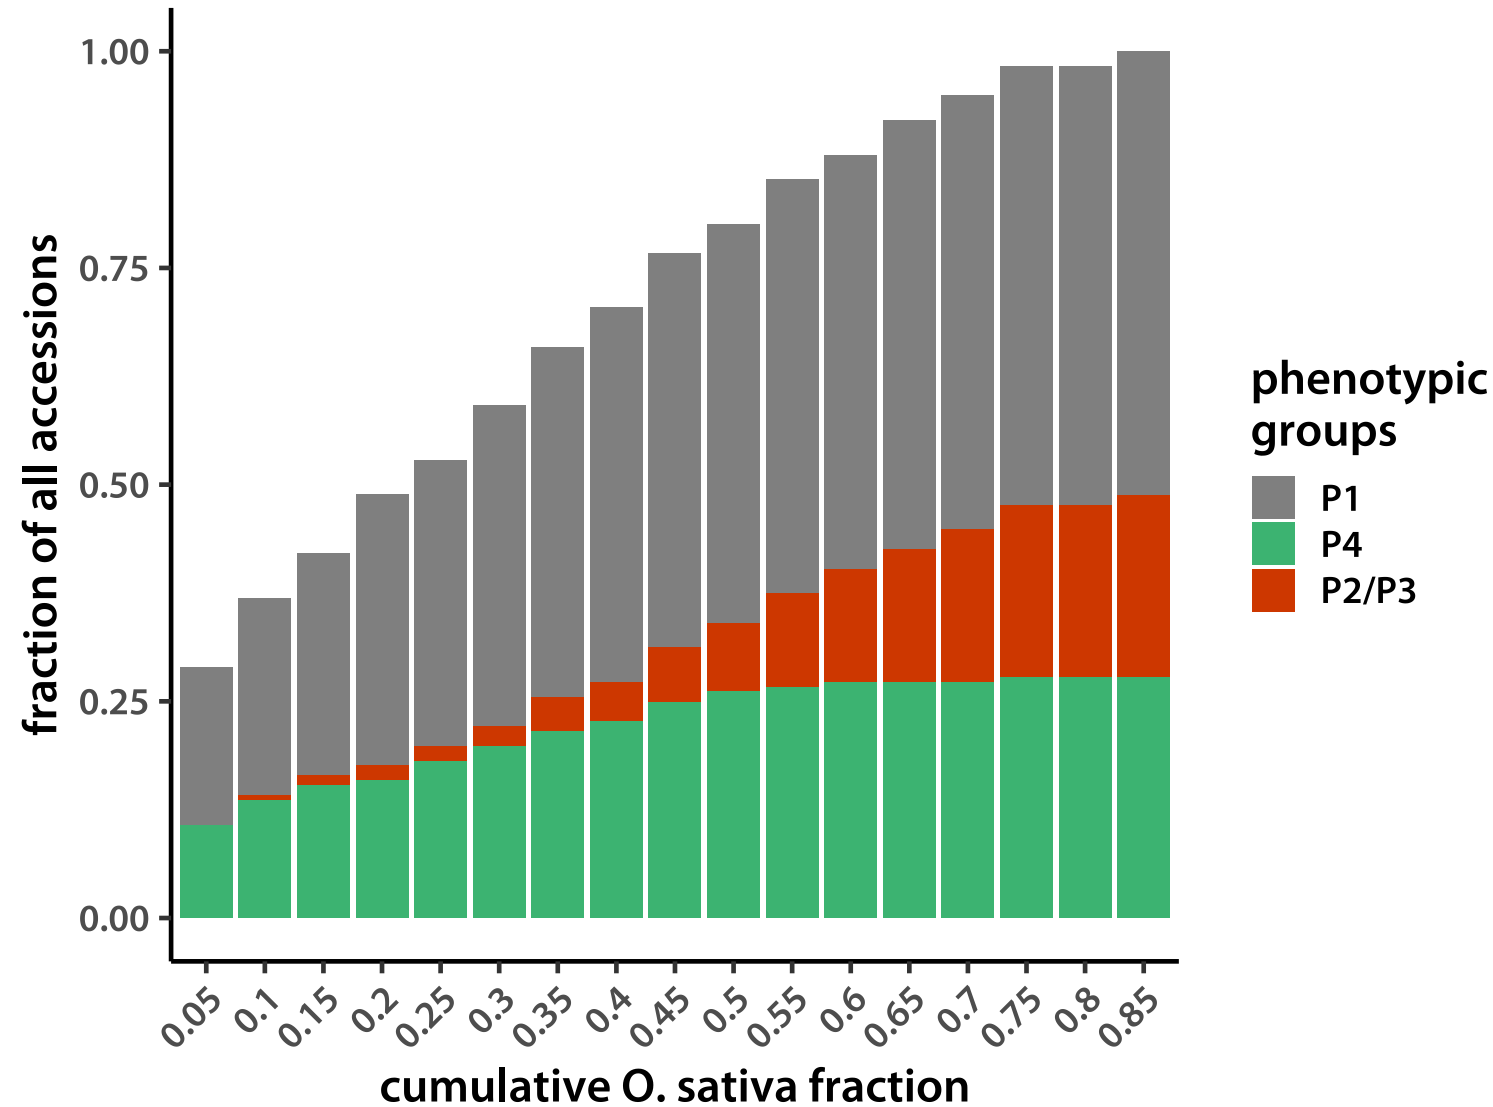

Supplement: Data_Sheet_1.ZIP [file cumOsatFrac.pdf › cumOsatFrac.pdf]

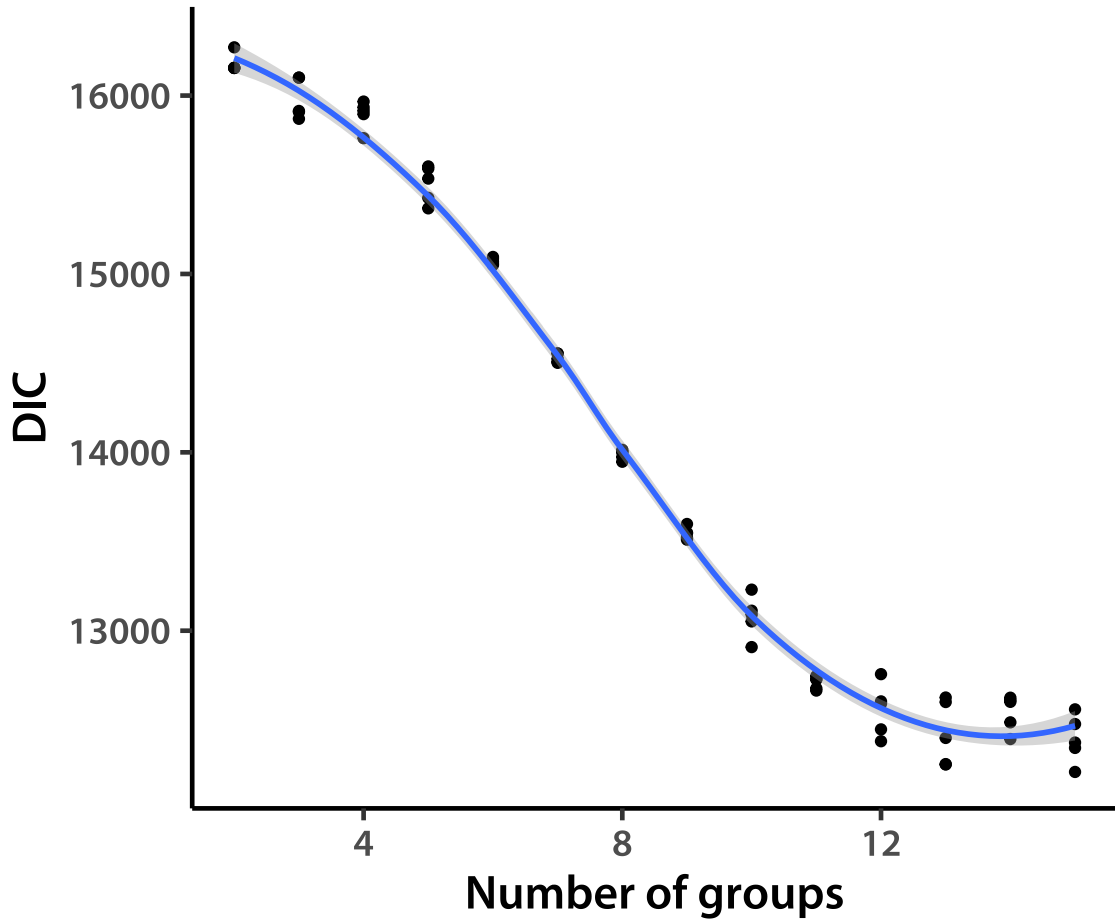

Supplement: Data_Sheet_1.ZIP [file dicIRRI.pdf › dicIRRI.pdf]

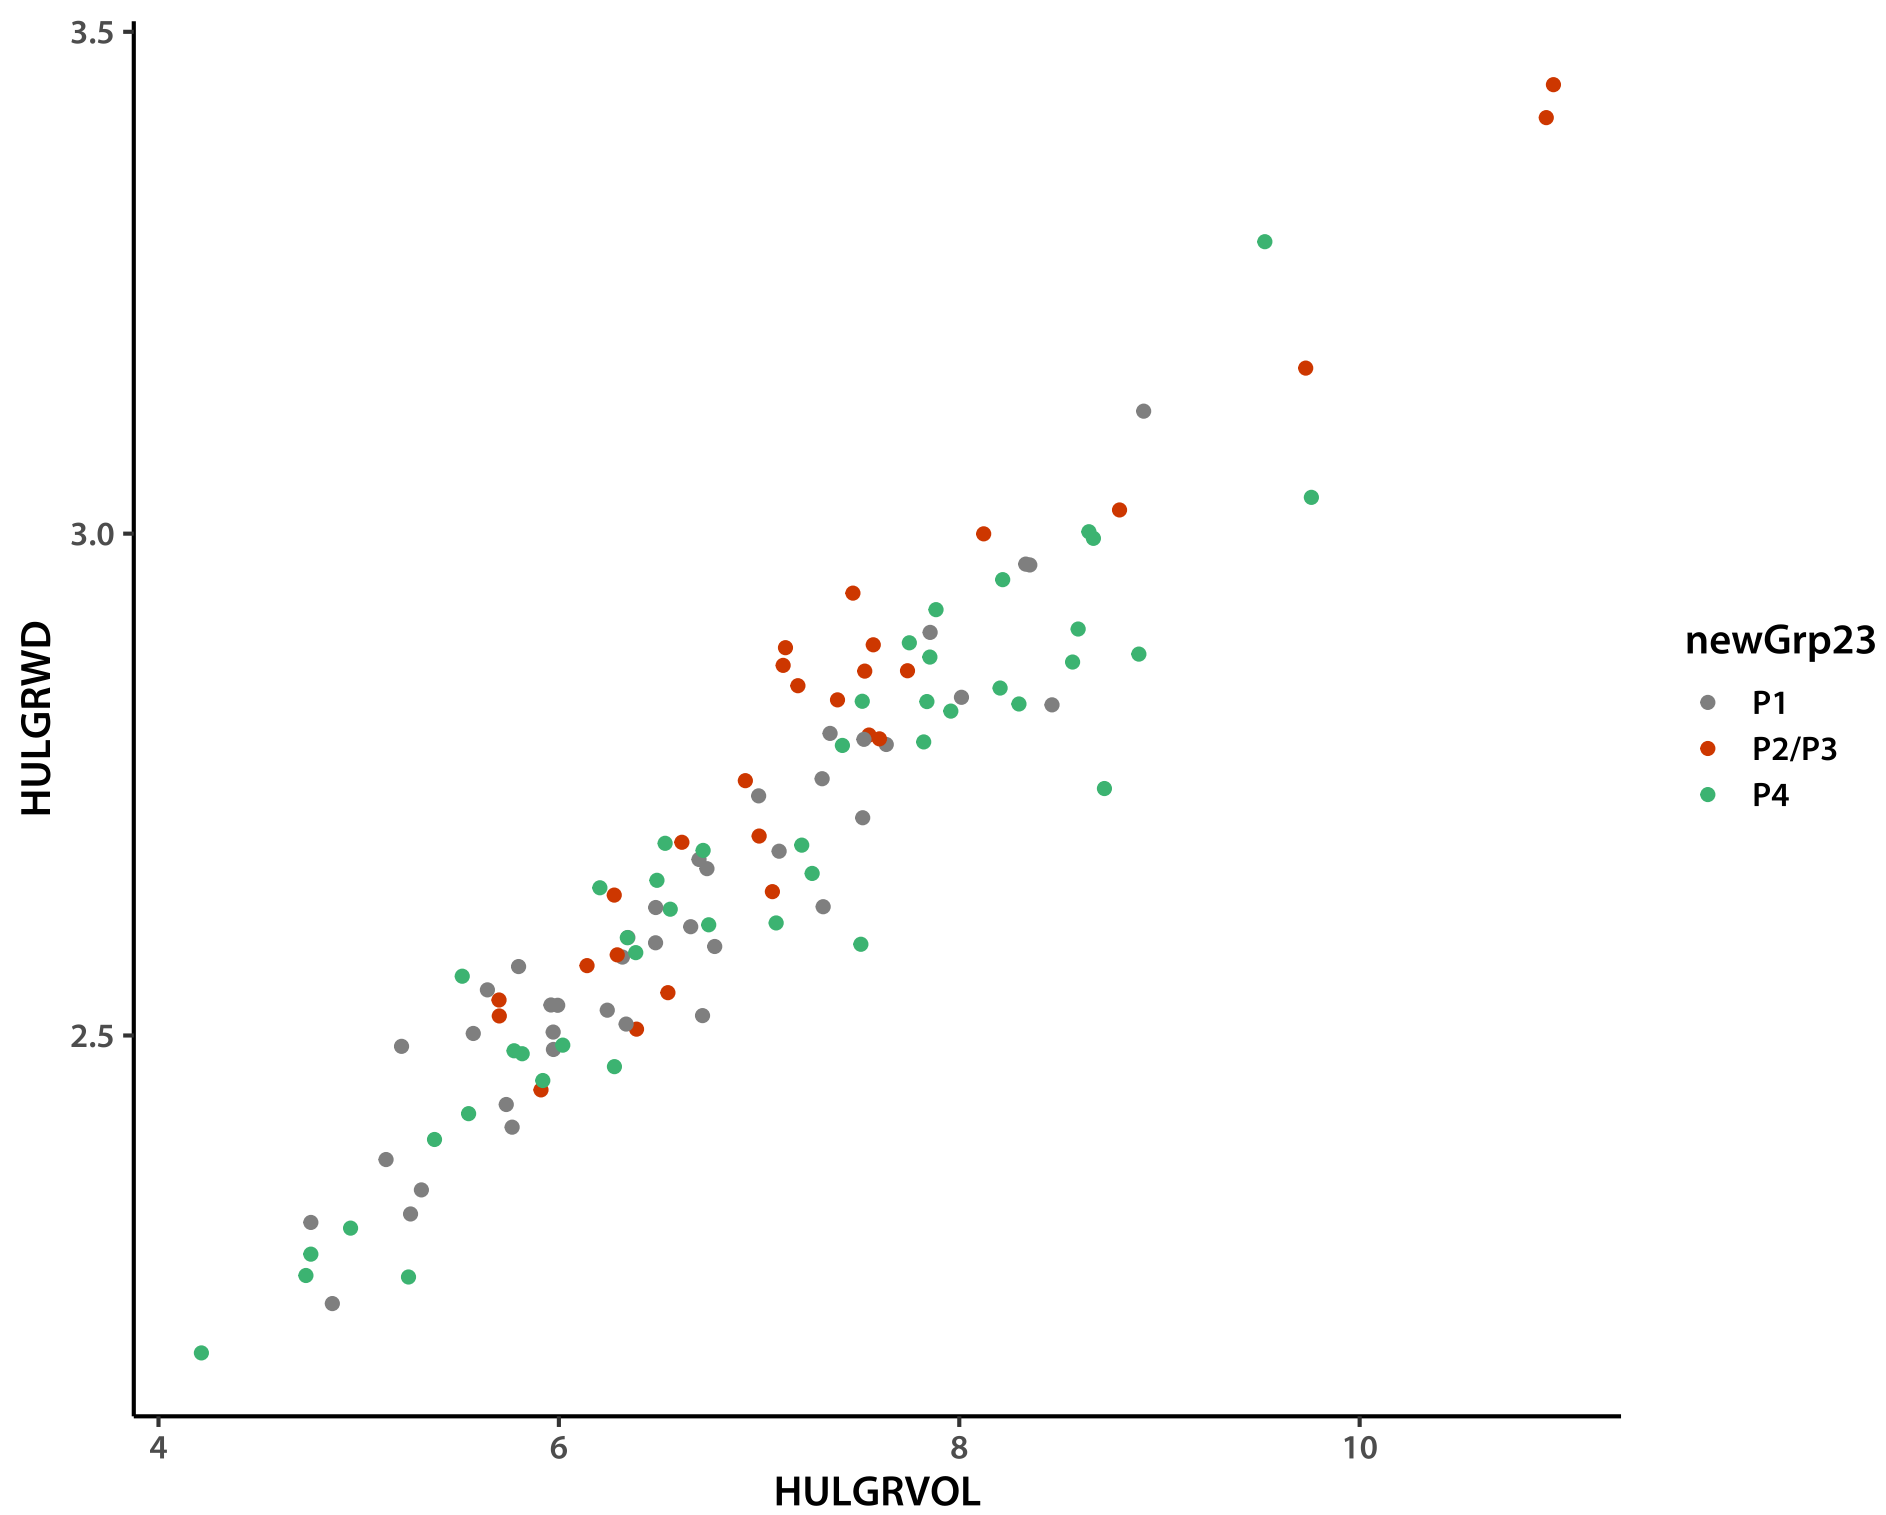

Supplement: Data_Sheet_1.ZIP [file grainsDB.pdf › grainsDB.pdf]

Number with > 2 lines

10

5

4

8

12

Number of groups

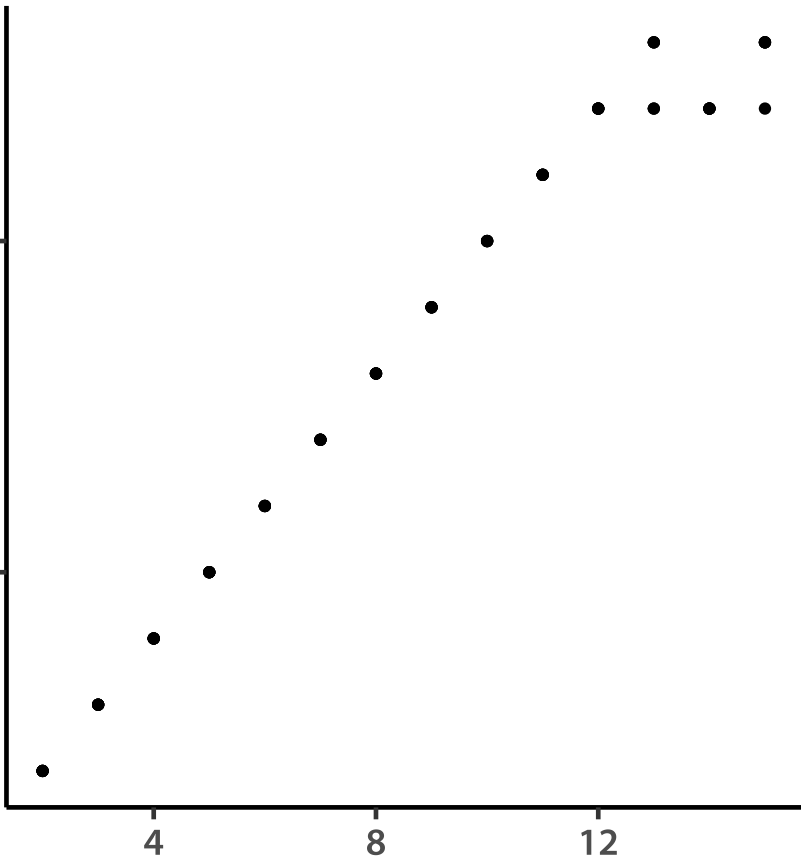

Supplement: Data_Sheet_1.ZIP [file gt2GrpIRRI.pdf › gt2GrpIRRI.pdf]

phenotypic group

●

P1

●

P4

●

P2/P3

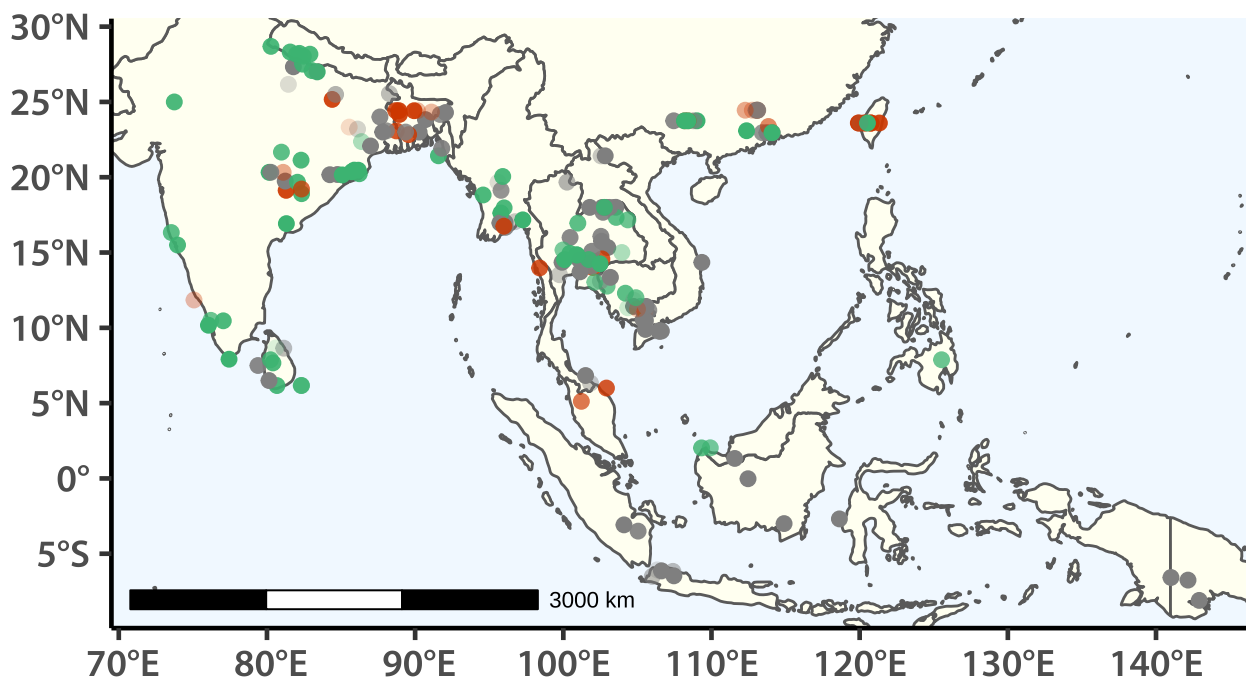

Supplement: Data_Sheet_1.ZIP [file mapIRRIp4.pdf › mapIRRIp4.pdf]

species    ● *O. rufipogon*    ● *O. nivara*

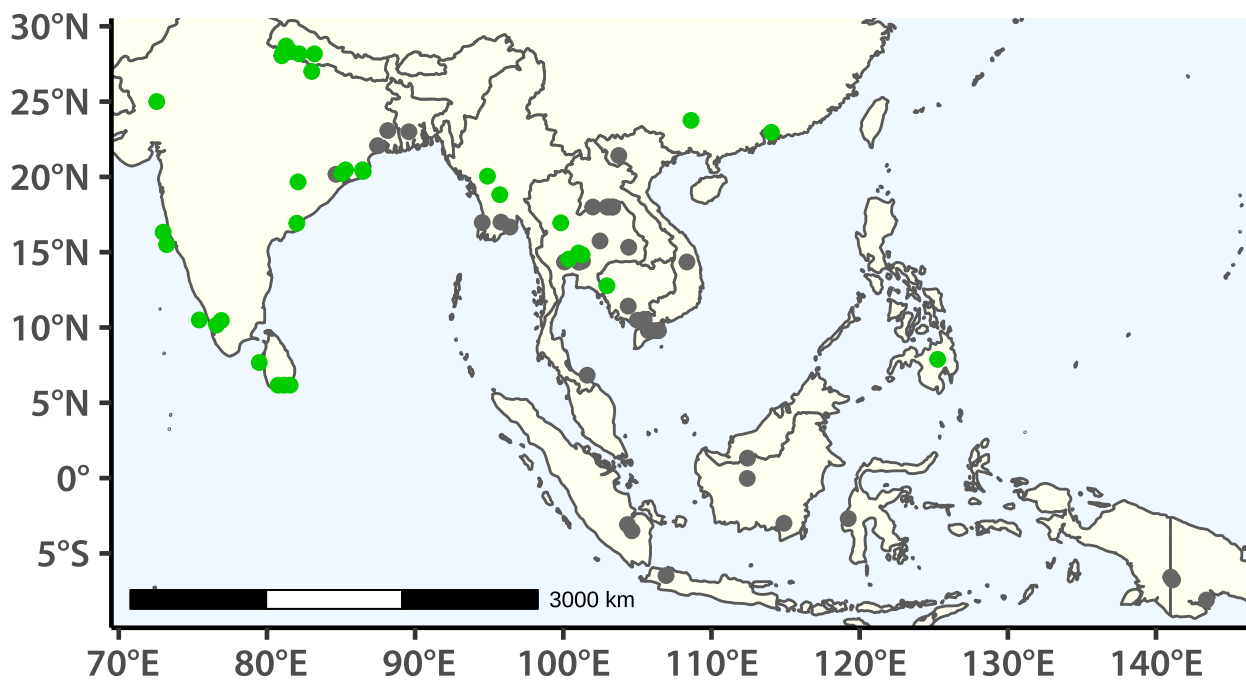

Supplement: Data_Sheet_1.ZIP [file mapPureSpp.pdf › mapPureSpp.pdf]

subpopulation

|    |    |    |
|----|----|----|
| W1 | W3 | W5 |
| W2 | W4 | W6 |

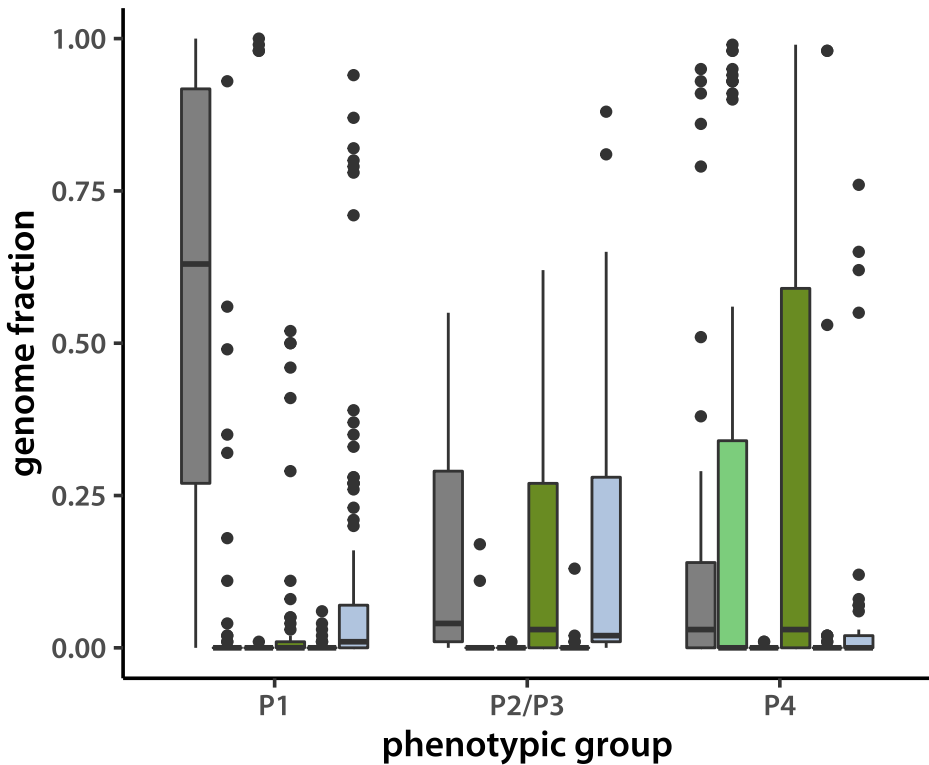

Supplement: Data_Sheet_1.ZIP [file rfmixRufiGrp4.pdf › rfmixRufiGrp4.pdf]

subpopulation

|     |     |     |
|-----|-----|-----|
| ARO | IND | TEJ |
| AUS | TRJ |     |

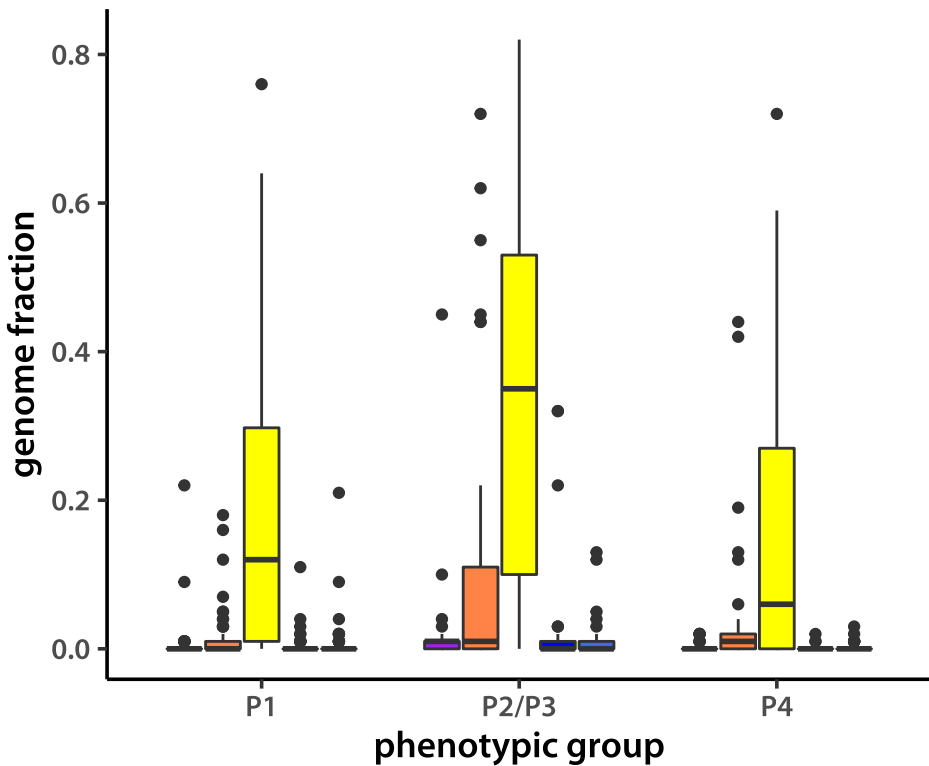

Supplement: Data_Sheet_1.ZIP [file rfmixSativaGrp4.pdf › rfmixSativaGrp4.pdf]

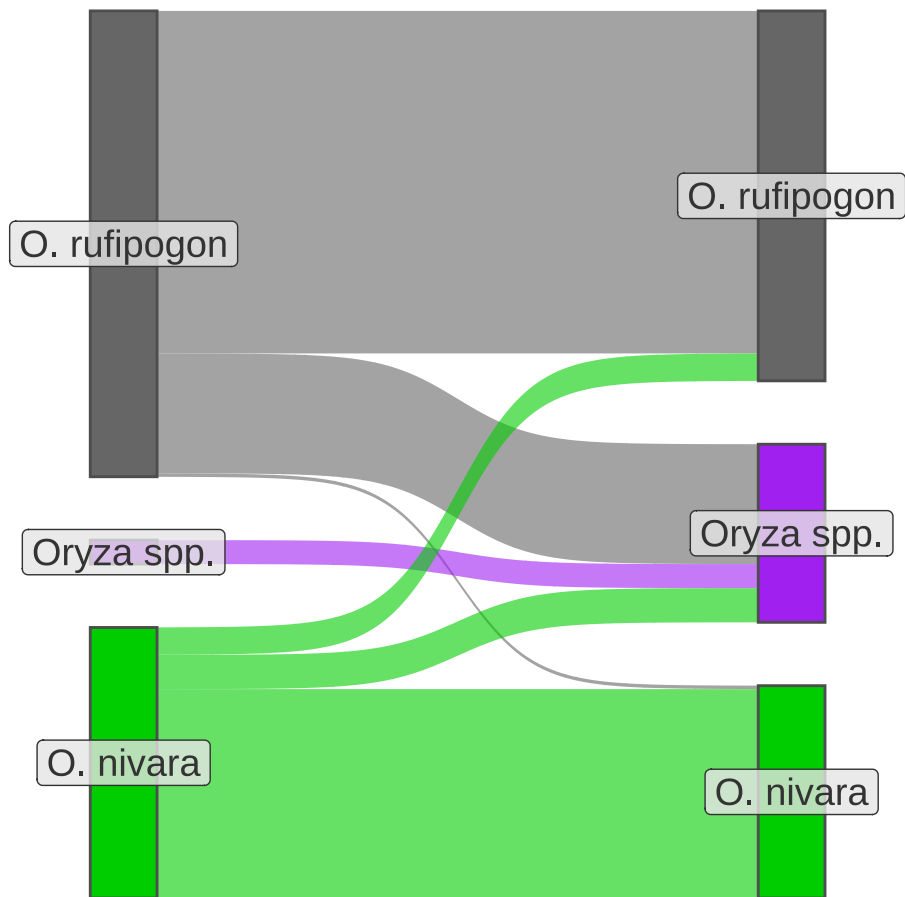

old species

GRIN species

designation

Supplement: Data_Sheet_1.ZIP [file sankeyGRINsppCompare.pdf › sankeyGRINsppCompare.pdf]

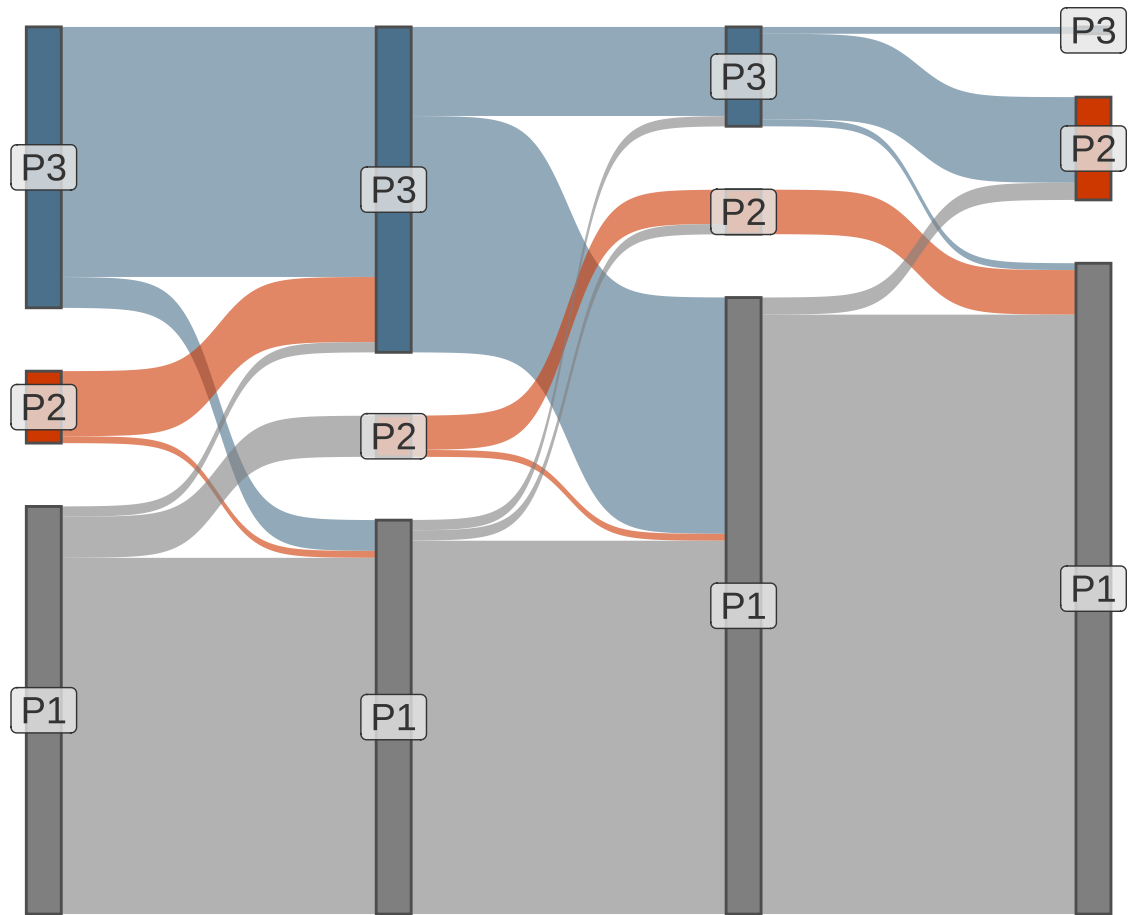

newGrp3s1

newGrp3s2

newGrp3s3

newGrp3

X

Supplement: Data_Sheet_1.ZIP [file sankeyPGrp3IRRI.pdf › sankeyPGrp3IRRI.pdf]

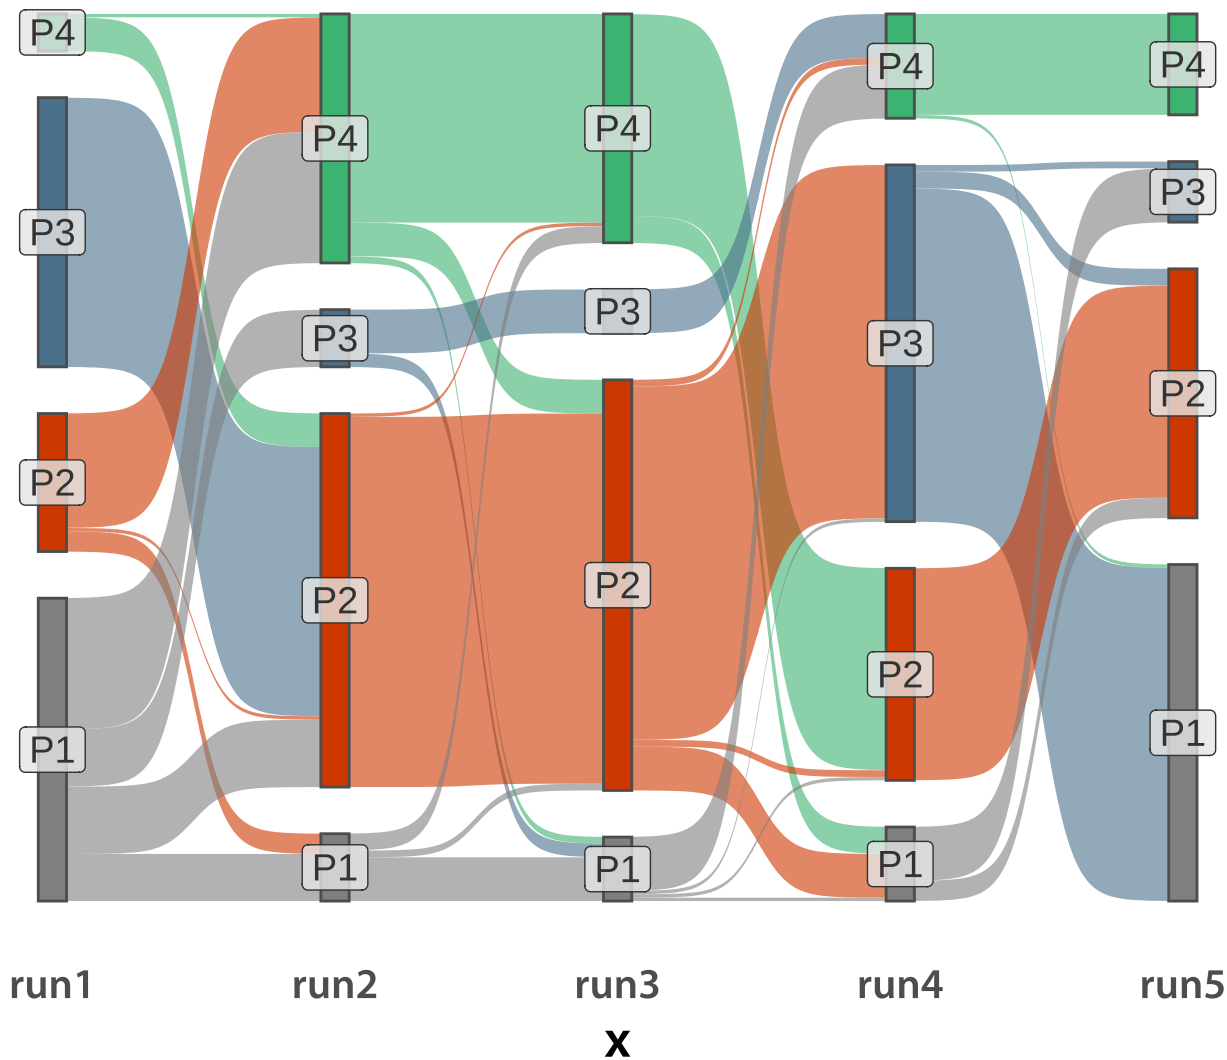

Supplement: Data_Sheet_1.ZIP [file sankeyPGrp4IRRIraw.pdf › sankeyPGrp4IRRIraw.pdf]

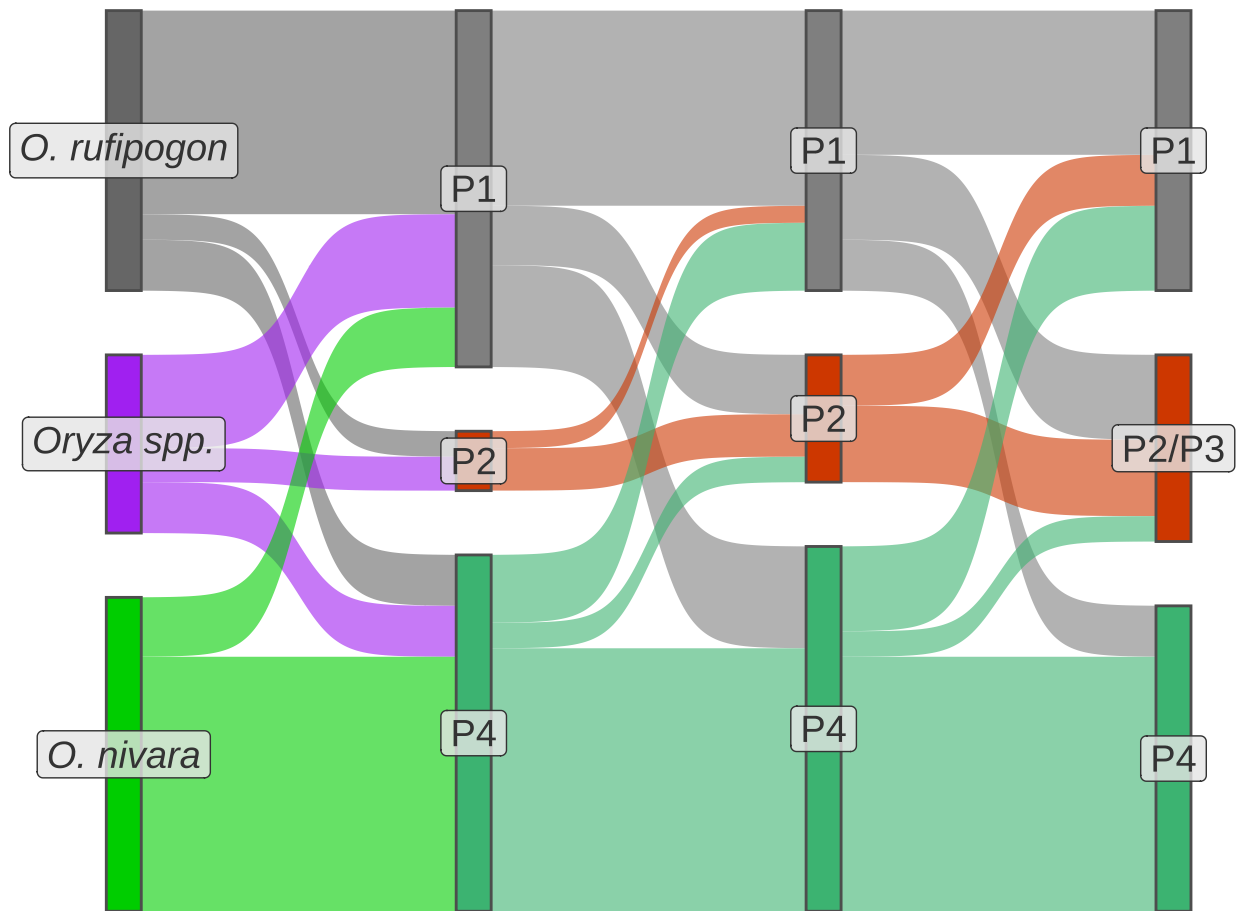

species

Dale  
Bumpers

Cornell

IRRI  
all traits

Supplement: Data_Sheet_1.ZIP [file sankeyPGrpCUDBp3.pdf › sankeyPGrpCUDBp3.pdf]

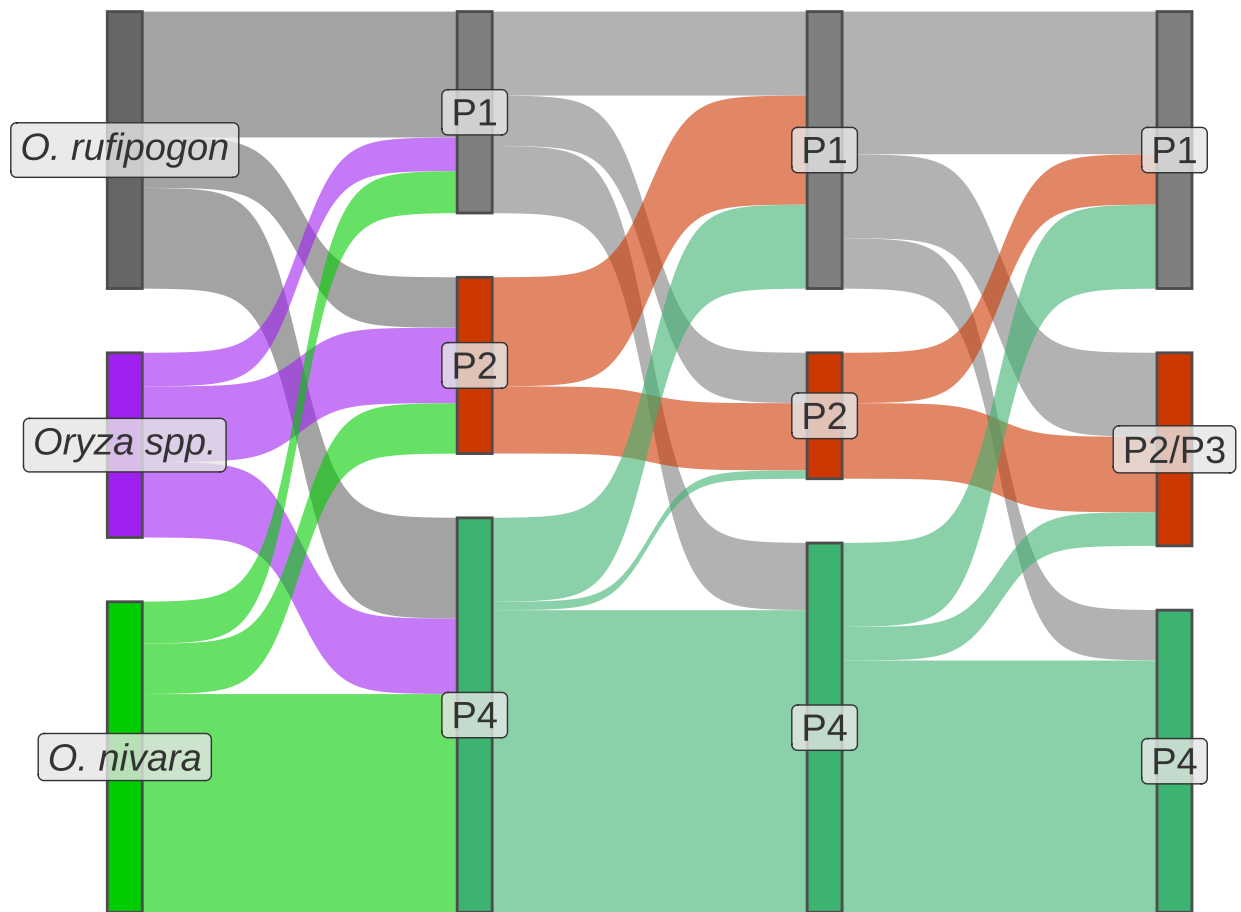

species

Cornell  
correlation (7)

Cornell  
all traits

IRRI  
all traits

Supplement: Data_Sheet_1.ZIP [file sankeyPGrpCUcor.pdf › sankeyPGrpCUcor.pdf]

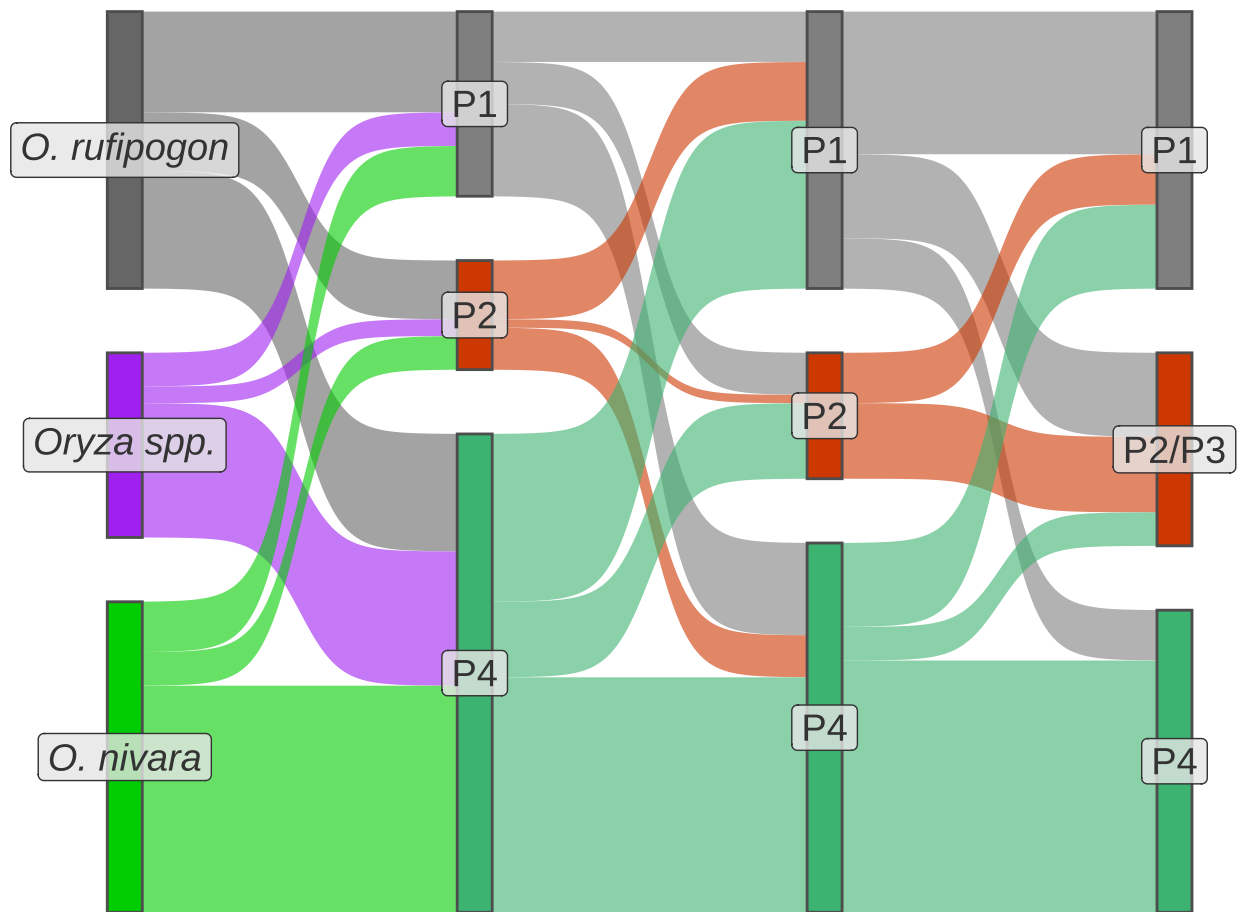

species

Cornell  
IRR1 5 (11) traits

Cornell  
all traits

IRR1  
all traits

Supplement: Data_Sheet_1.ZIP [file sankeyPGrpCUirri11.pdf › sankeyPGrpCUirri11.pdf]

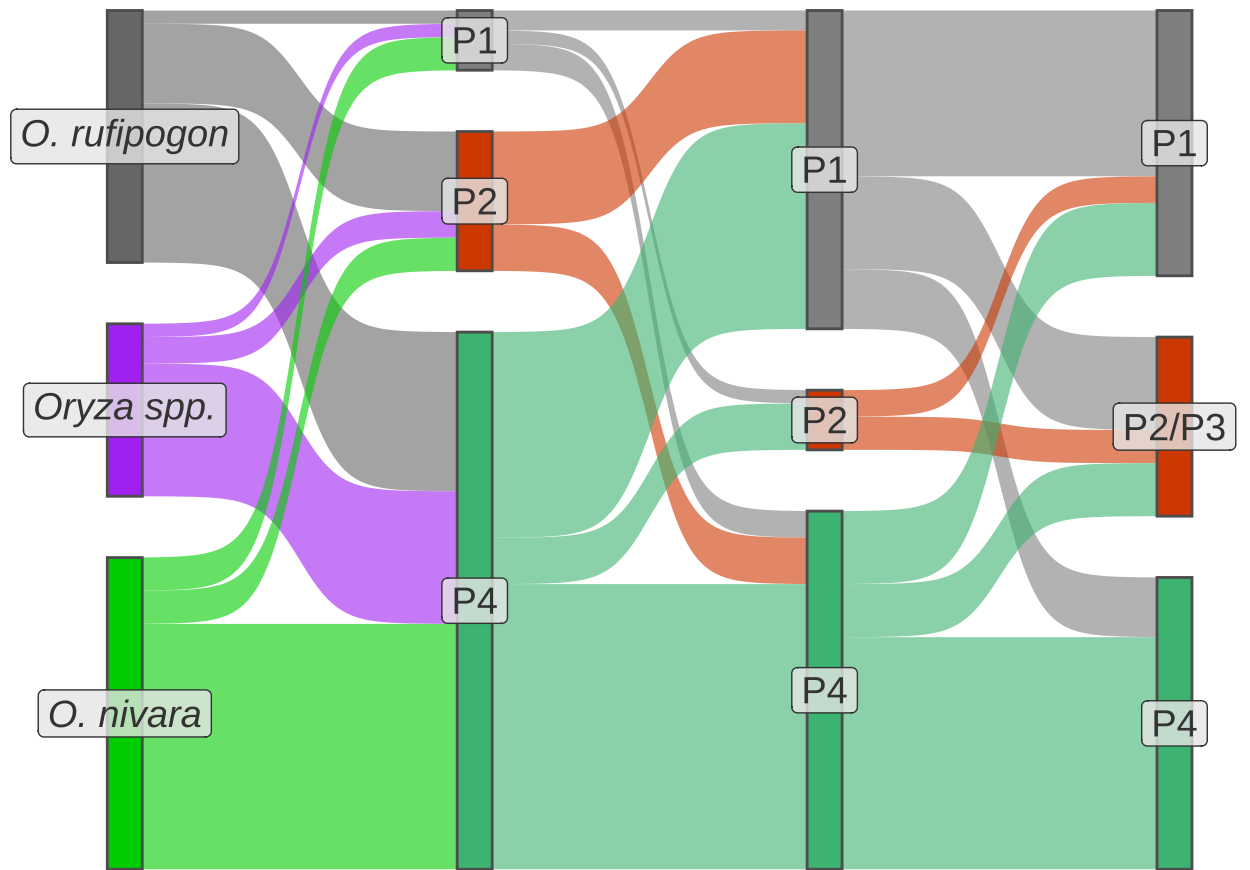

species

Dale Bumpers  
correlation (6)

Dale  
Bumpers  
all traits

IRRI  
all traits

Supplement: Data_Sheet_1.ZIP [file sankeyPGrpDBcor.pdf › sankeyPGrpDBcor.pdf]

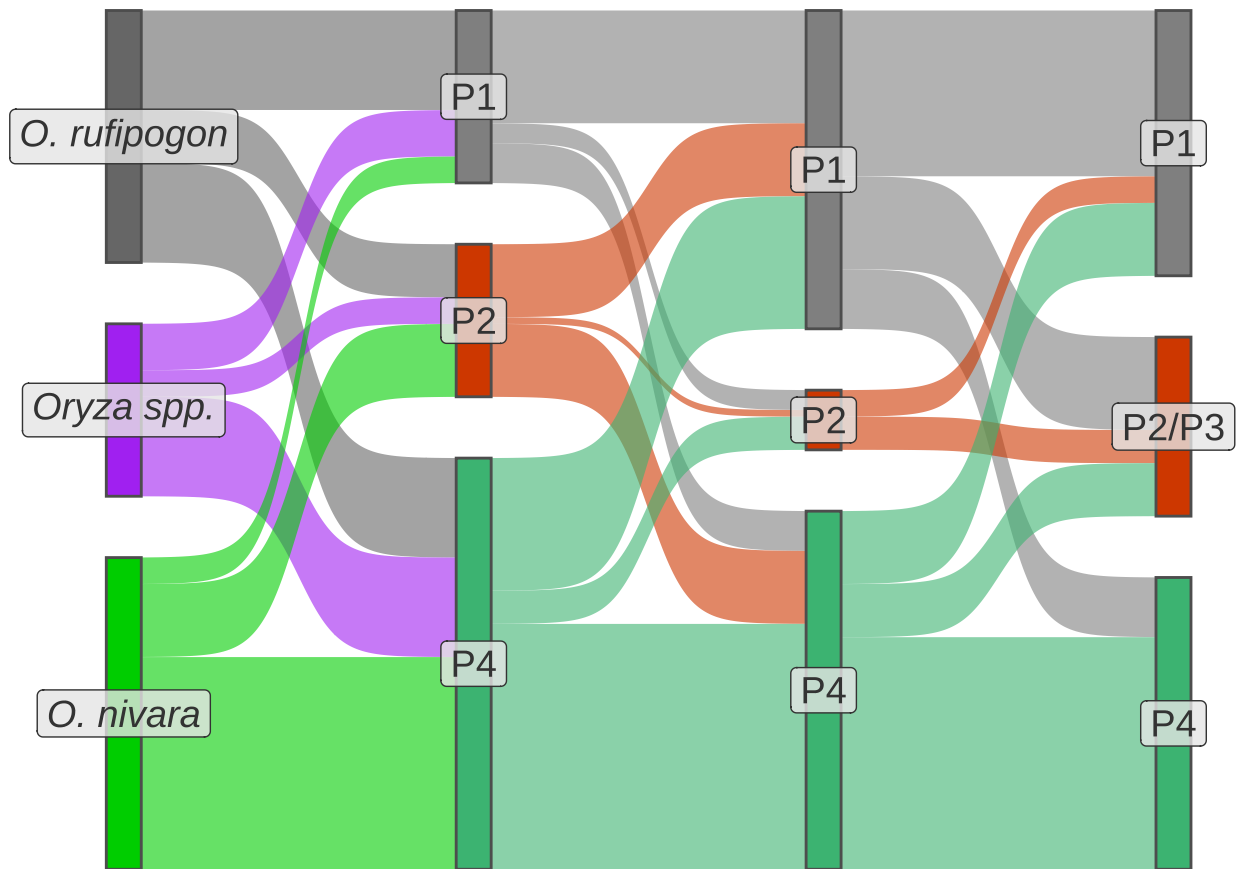

species

Dale Bumpers  
IRRI 8 (11) traits

Dale  
Bumpers  
all traits

IRRI  
all traits

Supplement: Data_Sheet_1.ZIP [file sankeyPGrpDBirri11.pdf › sankeyPGrpDBirri11.pdf]

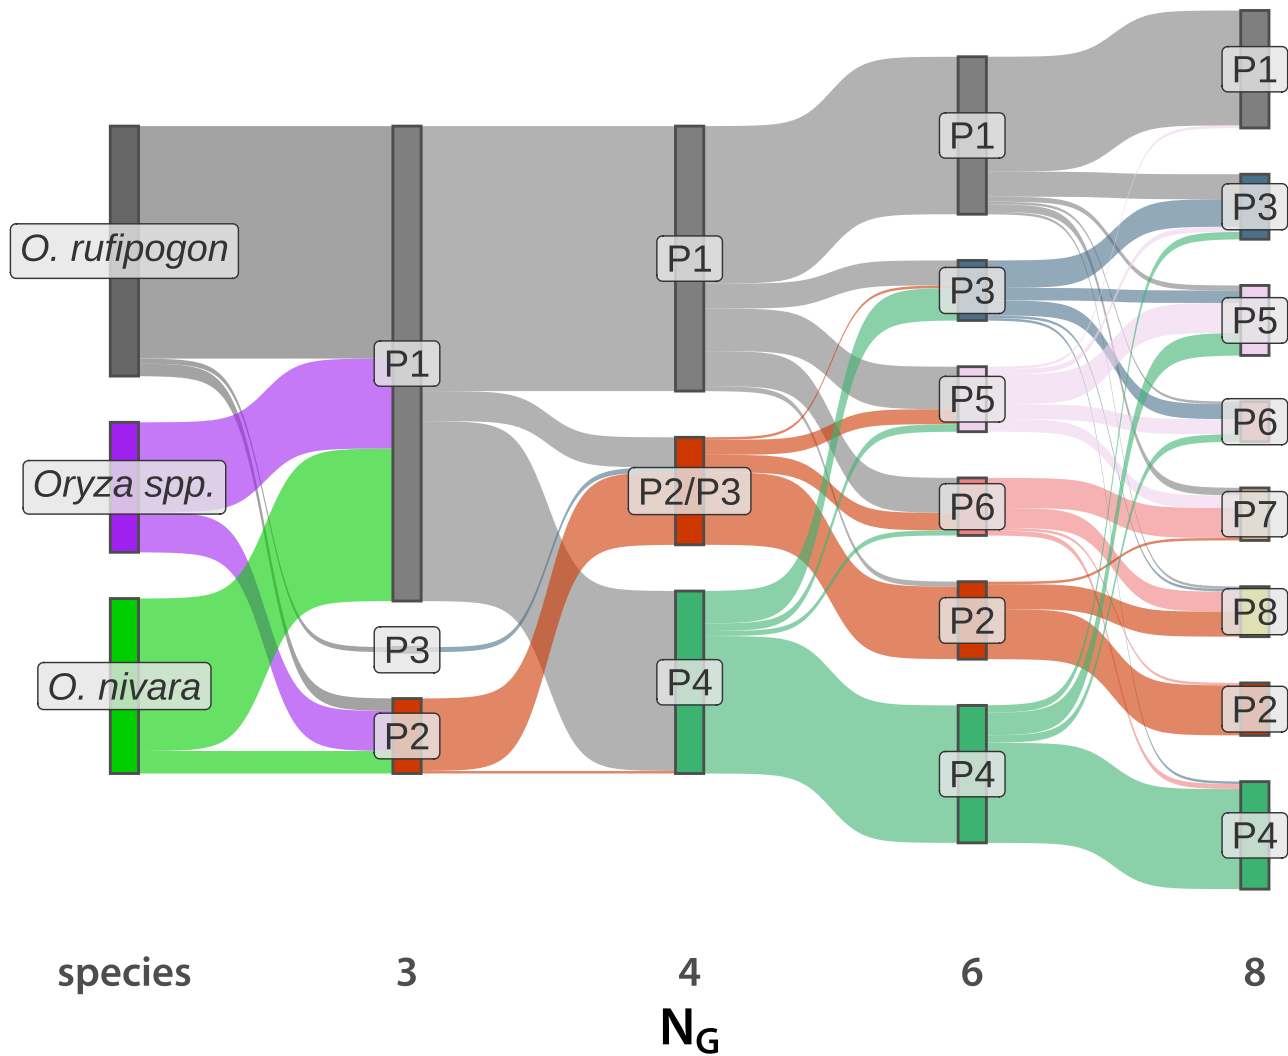

Supplement: Data_Sheet_1.ZIP [file sankeyPGrpIRRI.pdf › sankeyPGrpIRRI.pdf]

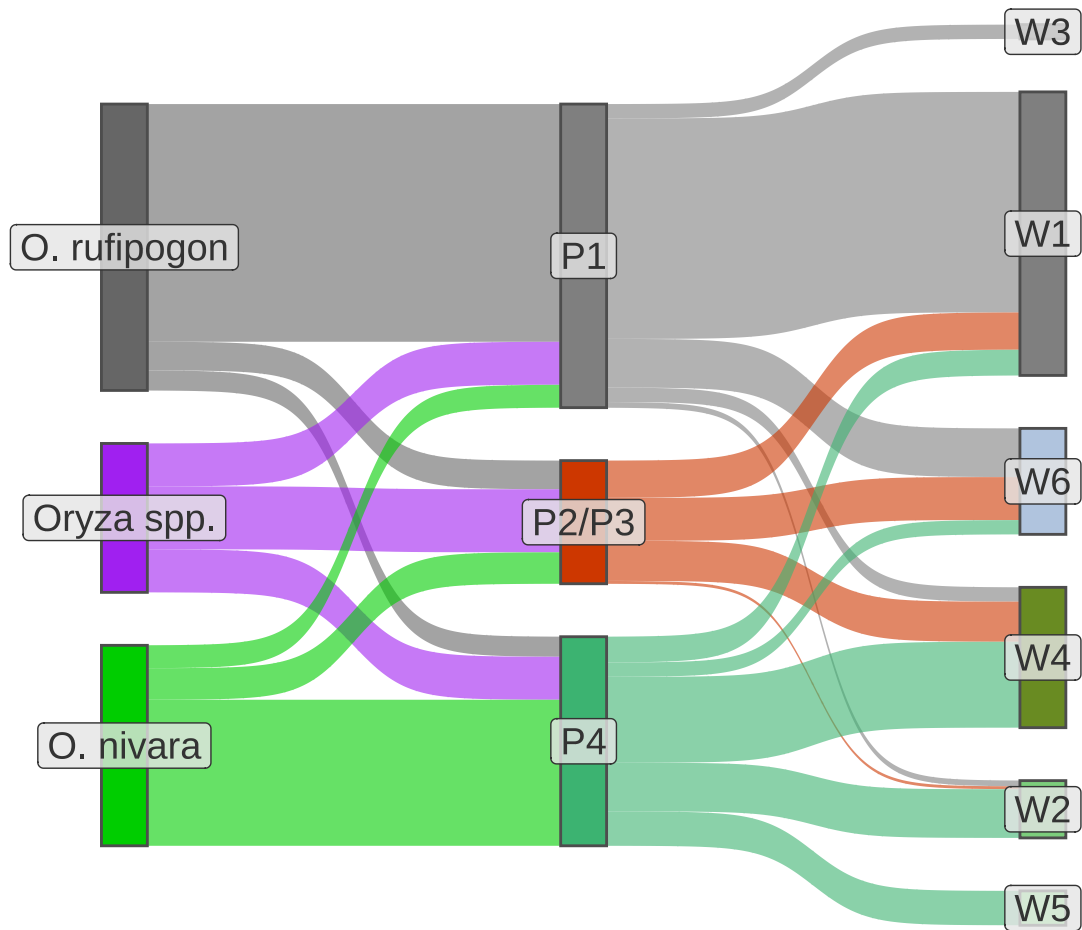

species

phenotypic  
groups

genetic  
subpopulations

Supplement: Data_Sheet_1.ZIP [file sankeyPGrpPopsIRRI.pdf › sankeyPGrpPopsIRRI.pdf]

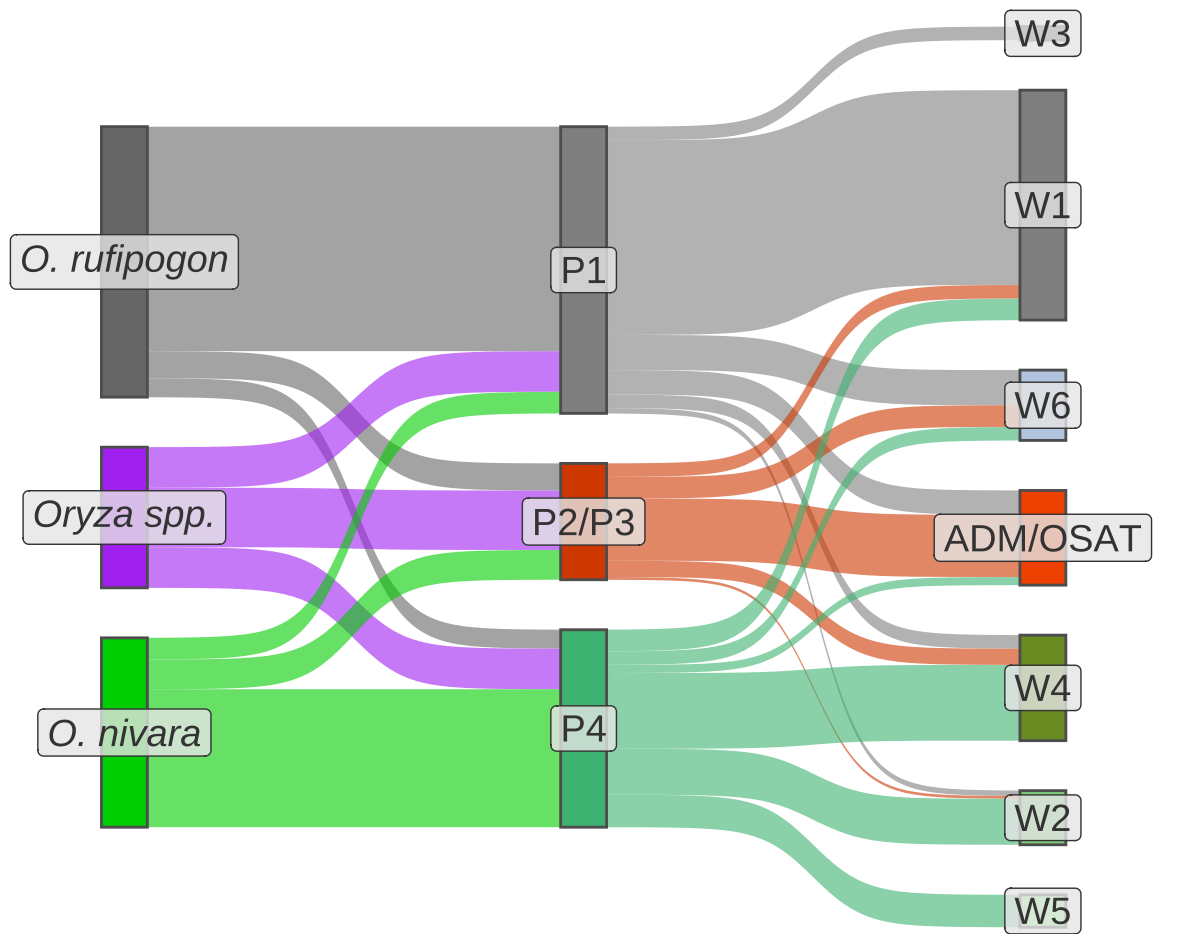

species

phenotypic  
groups

genetic  
subpopulations

Supplement: Data_Sheet_1.ZIP [file sankeyPGrpPopsIRRIsat.pdf › sankeyPGrpPopsIRRIsat.pdf]

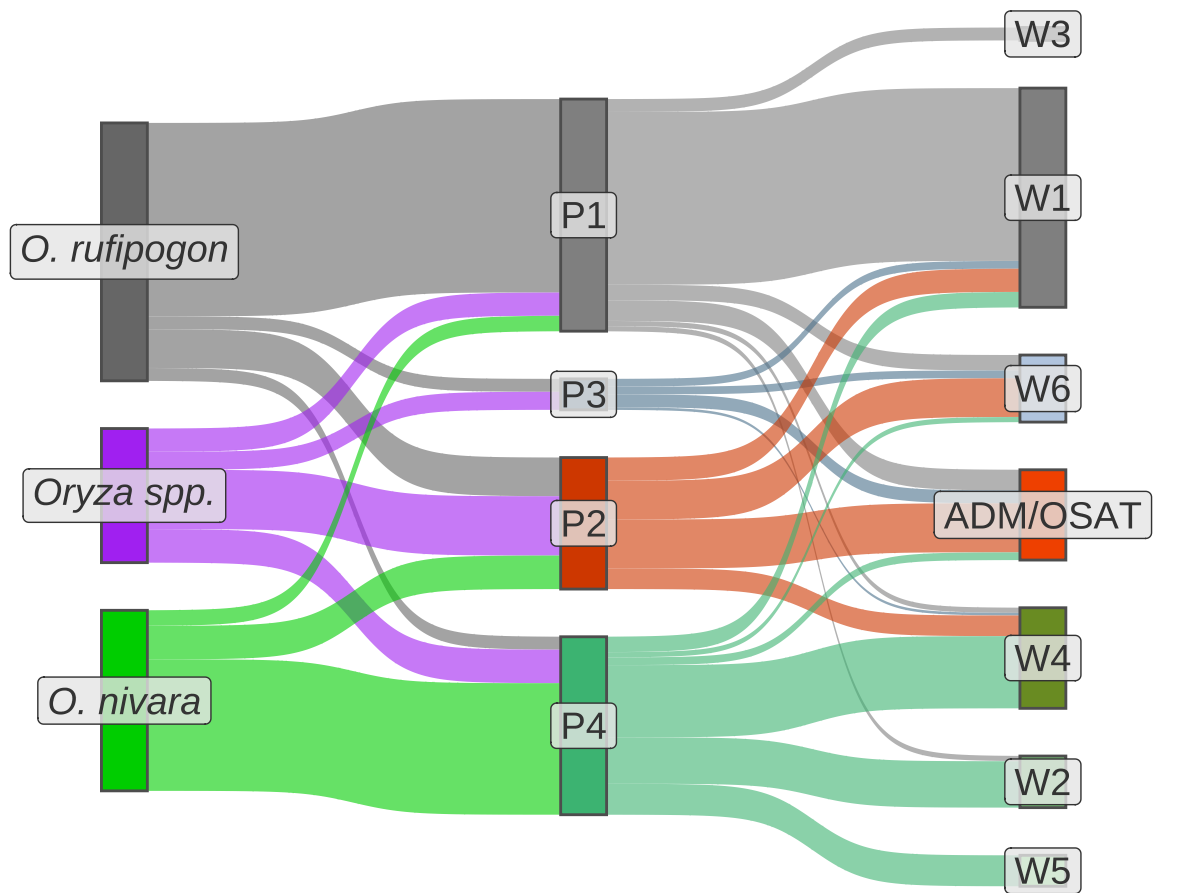

species

phenotypic  
groups  
(16 traits)

genetic  
subpopulations

Supplement: Data_Sheet_1.ZIP [file sankeyPGrpPopsIRRIsatSubs.pdf › sankeyPGrpPopsIRRIsatSubs.pdf]

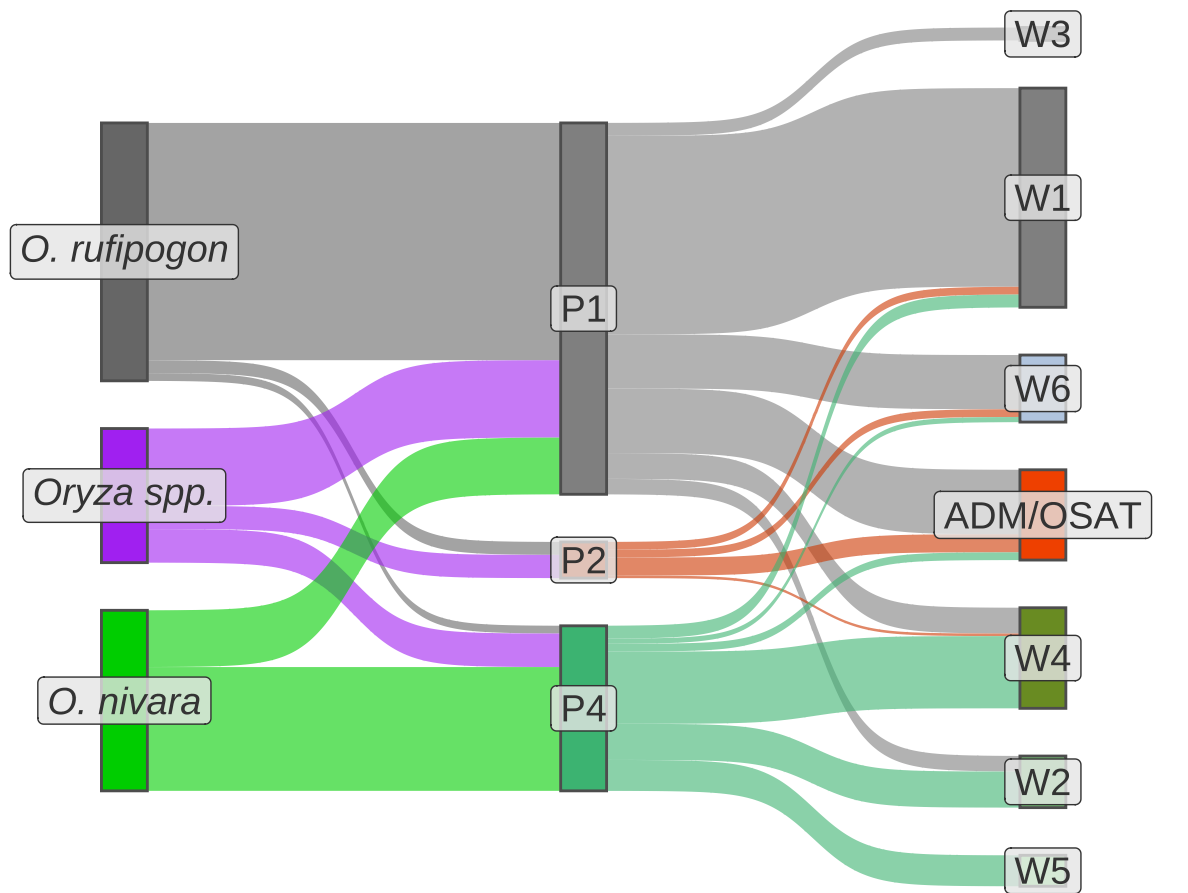

species

phenotypic  
groups  
(16 traits)

genetic  
subpopulations

Supplement: Data_Sheet_1.ZIP [file sankeyPGrpPopsIRRIsatSubsP3.pdf › sankeyPGrpPopsIRRIsatSubsP3.pdf]

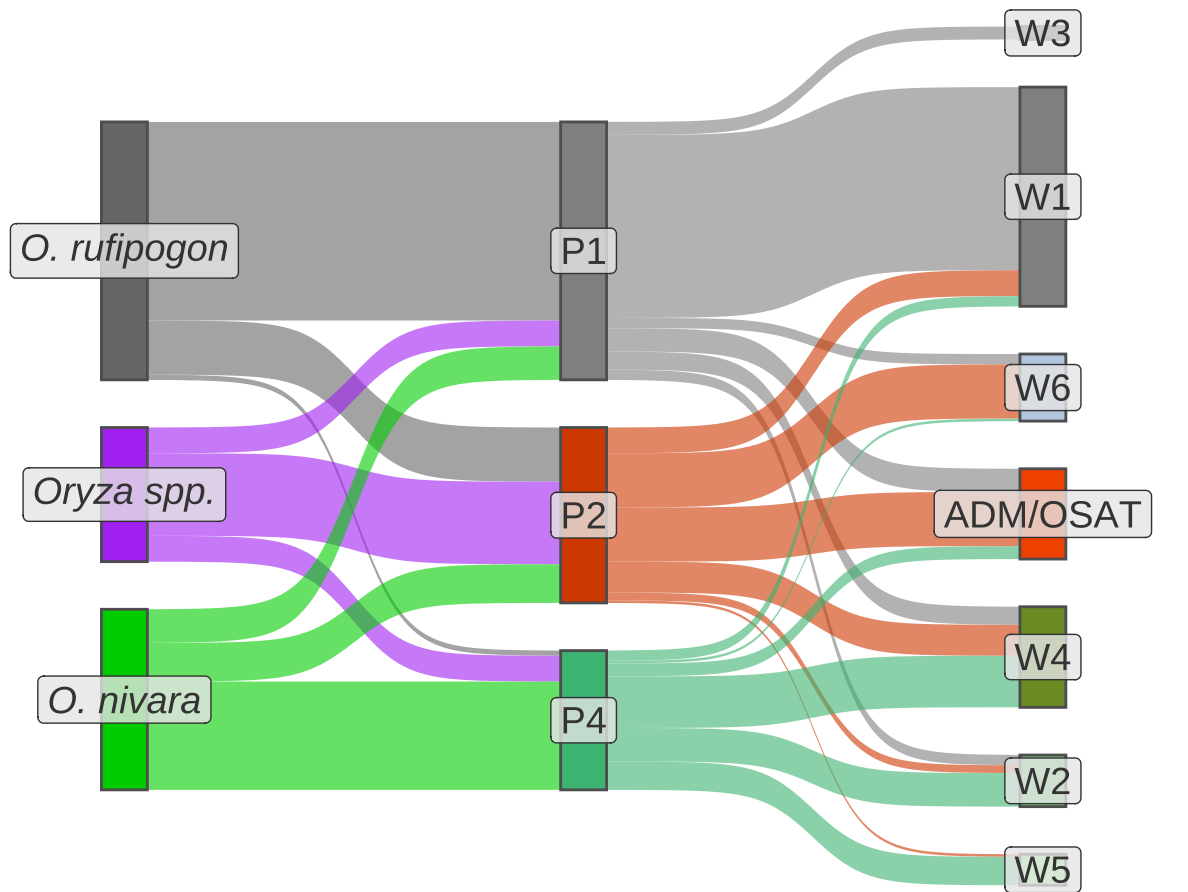

species

phenotypic  
groups  
(11 traits)

genetic  
subpopulations

Supplement: Data_Sheet_1.ZIP [file sankeyPGrpPopsIRRIsatSubsP3cor.pdf › sankeyPGrpPopsIRRIsatSubsP3cor.pdf]

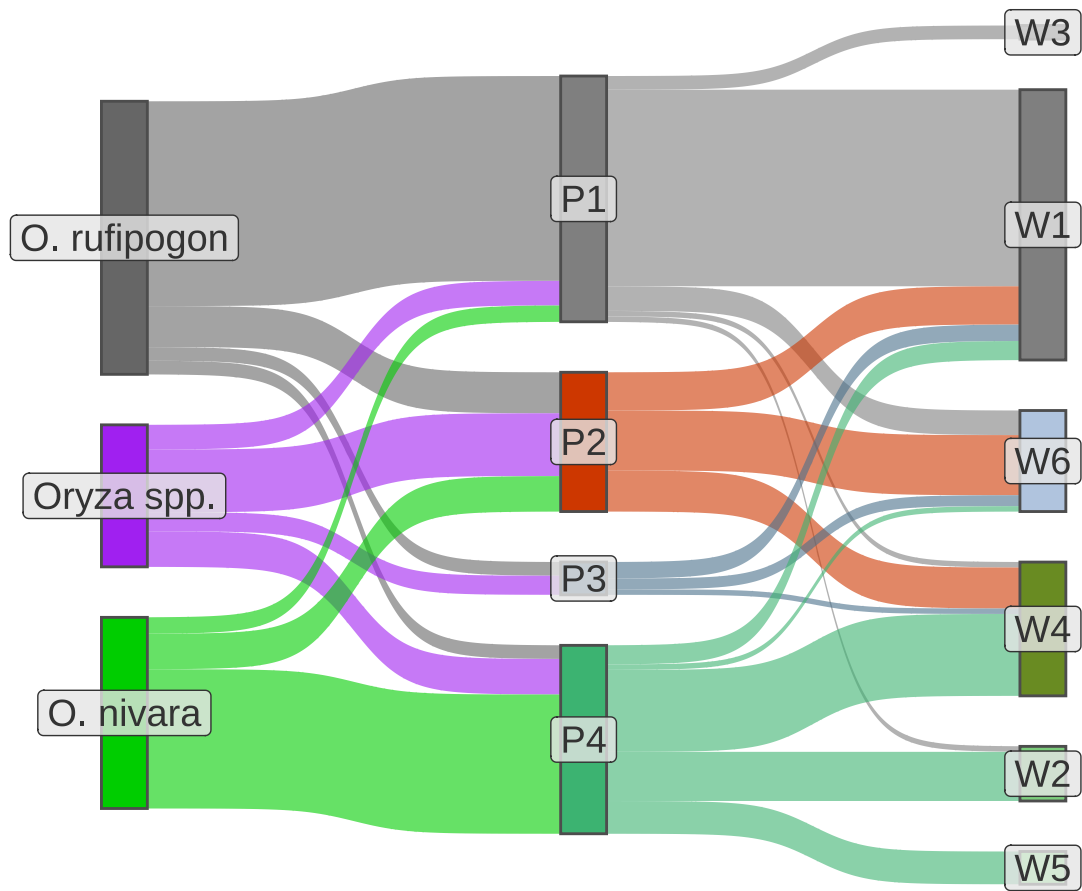

species

phenotypic  
groups  
(16 traits)

genetic  
subpopulations

Supplement: Data_Sheet_1.ZIP [file sankeyPGrpPopsIRRIsubs.pdf › sankeyPGrpPopsIRRIsubs.pdf]

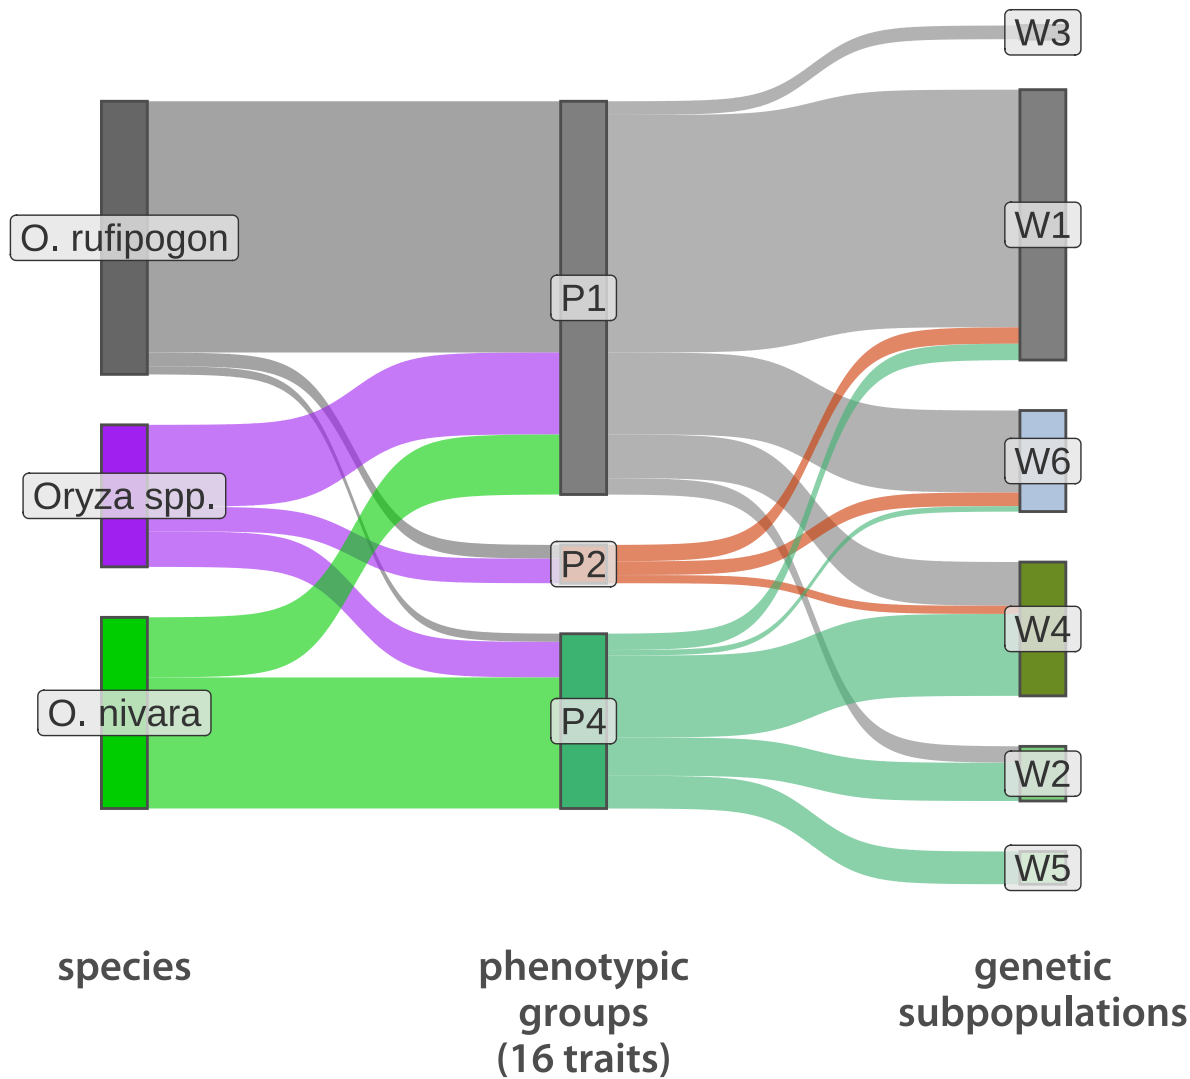

Supplement: Data_Sheet_1.ZIP [file sankeyPGrpPopsIRRIsubsP3.pdf › sankeyPGrpPopsIRRIsubsP3.pdf]

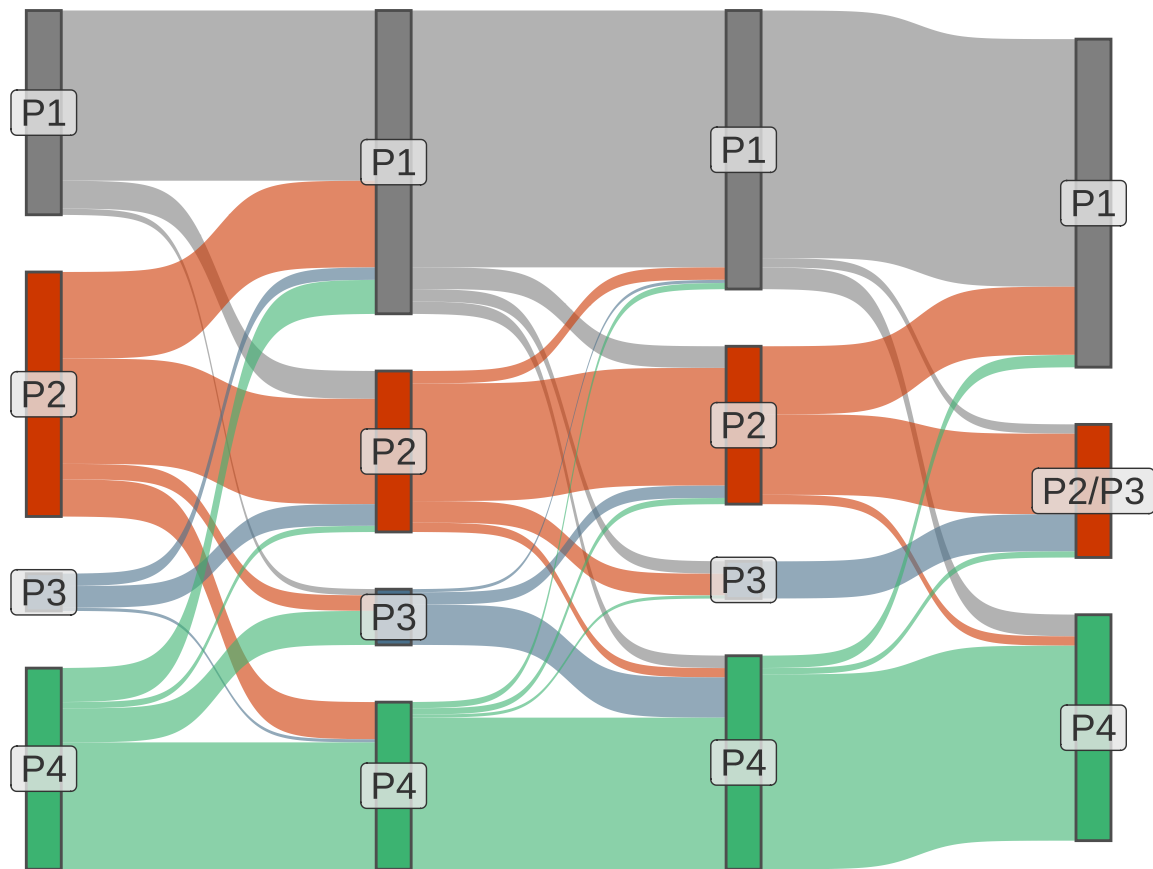

**top by  
value  
9 traits**

**top by  
correlation  
11 traits**

**value  
+ correlation  
16 traits**

**all  
data  
32 traits**

Supplement: Data_Sheet_1.ZIP [file sankeyPGrpSubsIRRI.pdf › sankeyPGrpSubsIRRI.pdf]

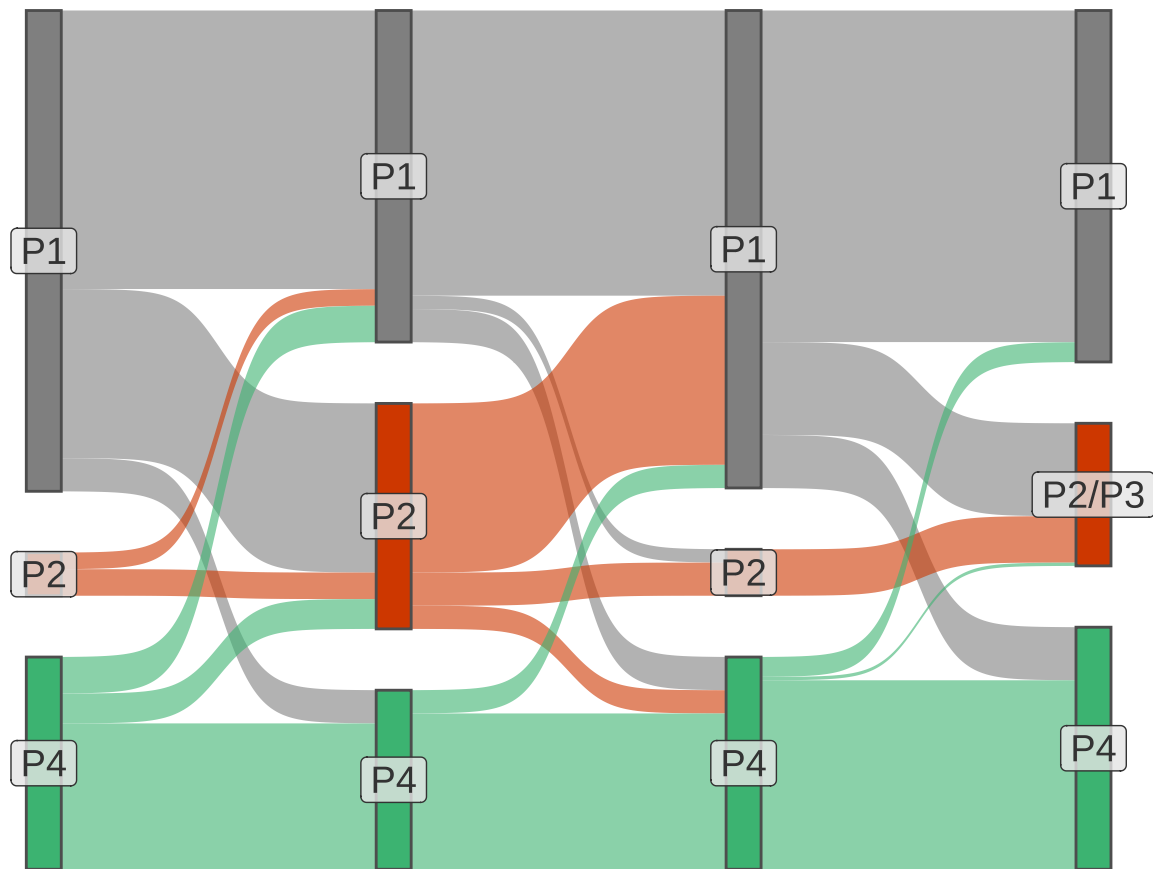

**top by  
value  
9 traits**

**top by  
correlation  
11 traits**

**value  
+ correlation  
16 traits**

**all  
data  
32 traits**

Supplement: Data_Sheet_1.ZIP [file sankeyPGrpSubsIRRIP3.pdf › sankeyPGrpSubsIRRIP3.pdf]

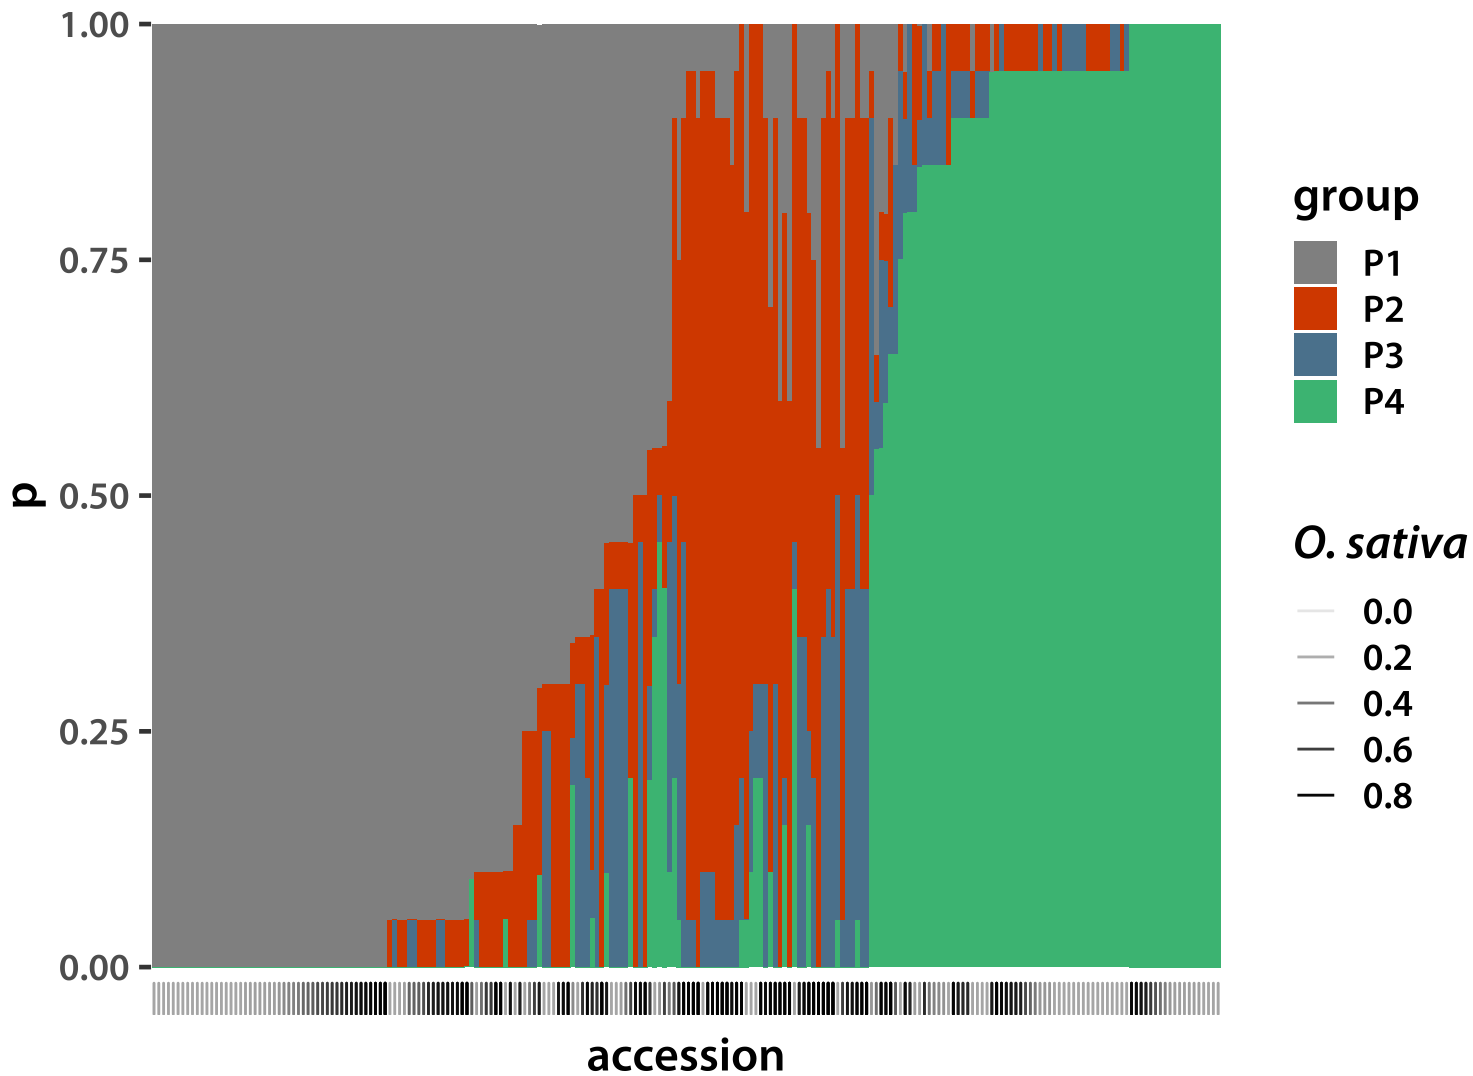

Supplement: Data_Sheet_1.ZIP [file structIRRIP4.pdf › structIRRIP4.pdf]

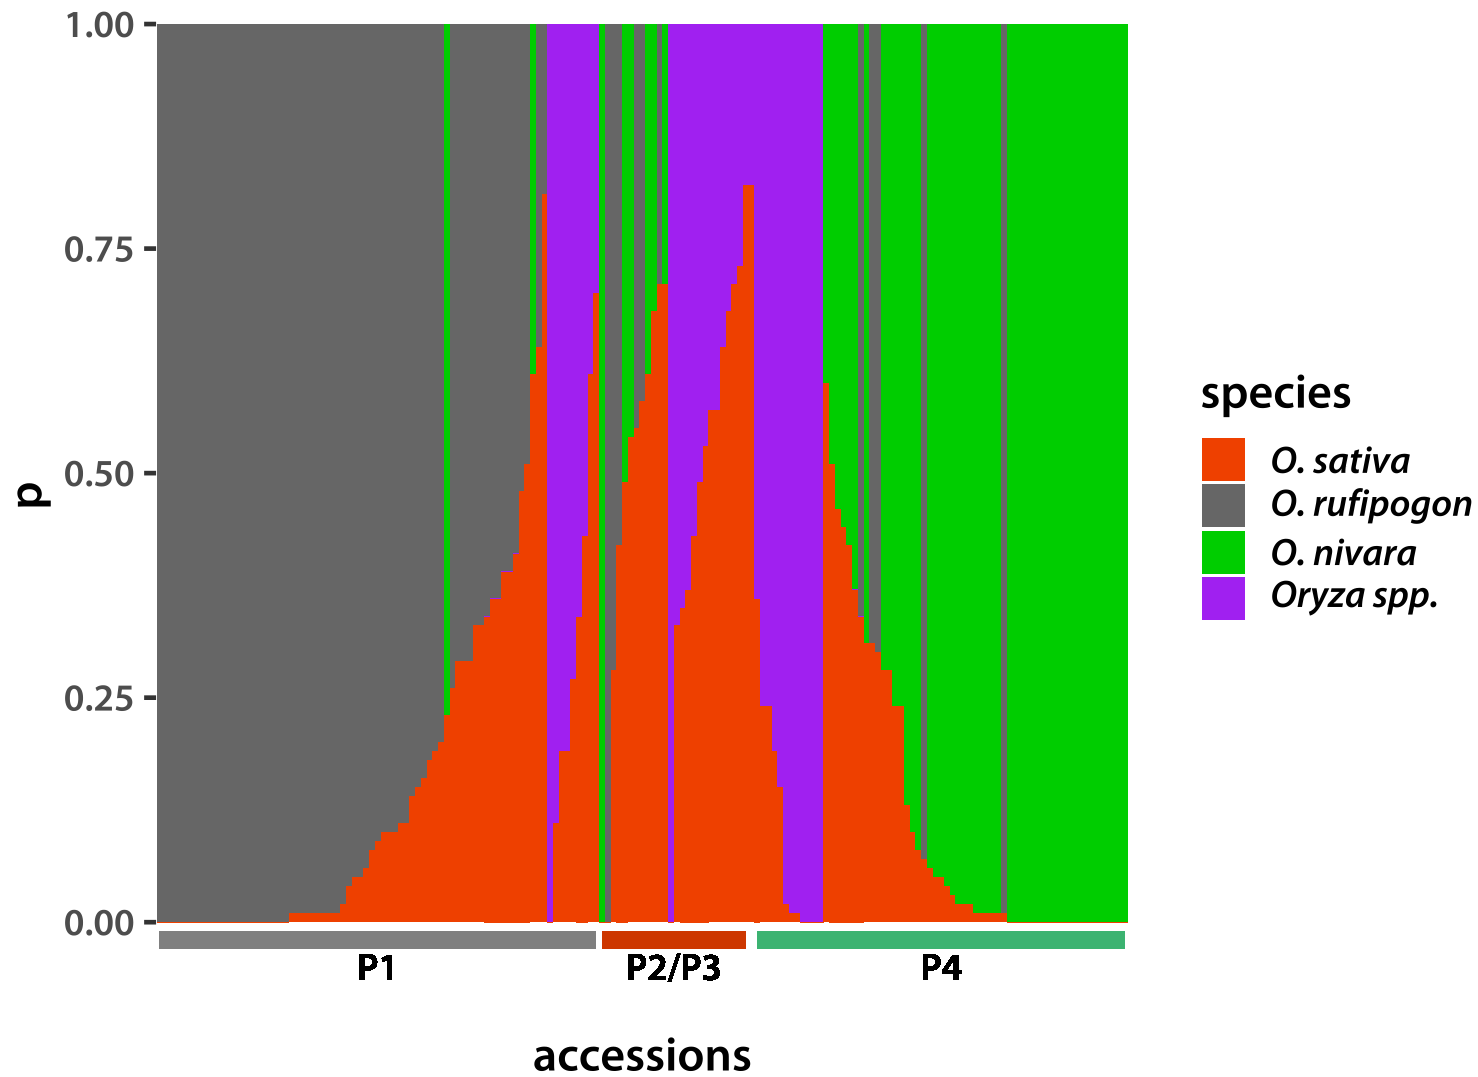

Supplement: Data_Sheet_1.ZIP [file structSppOsat.pdf › structSppOsat.pdf]

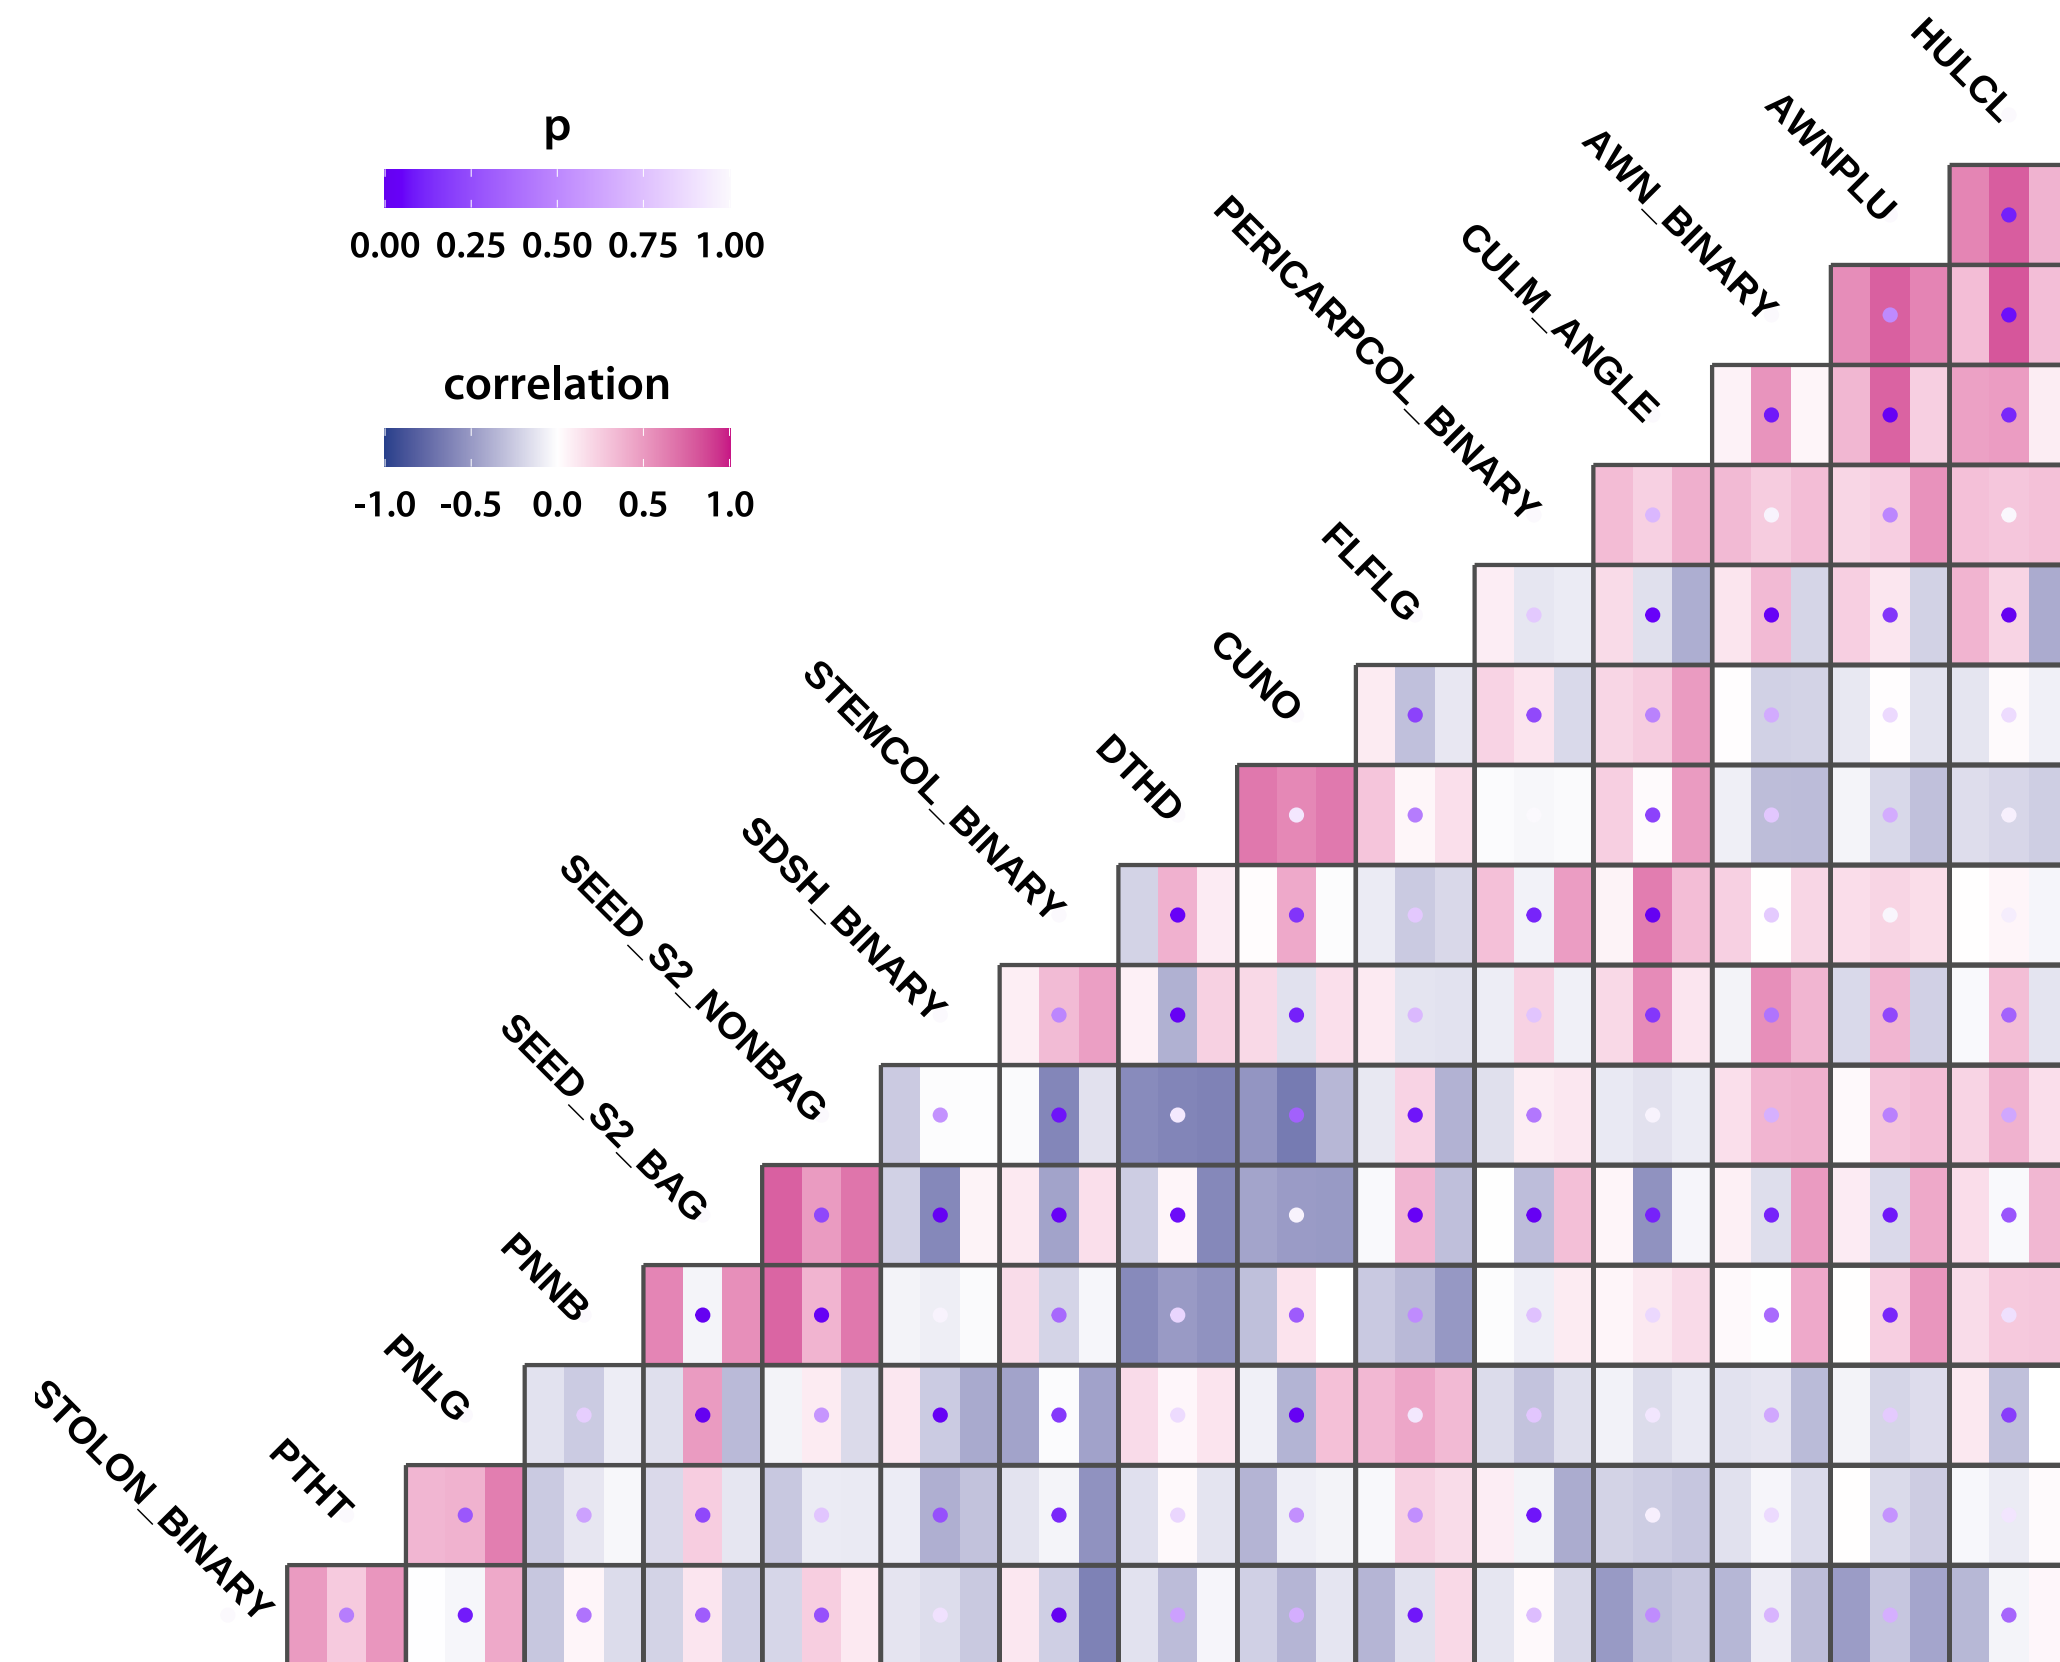

Supplement: Data_Sheet_1.ZIP [file traitCorCUp4.pdf › traitCorCUp4.pdf]

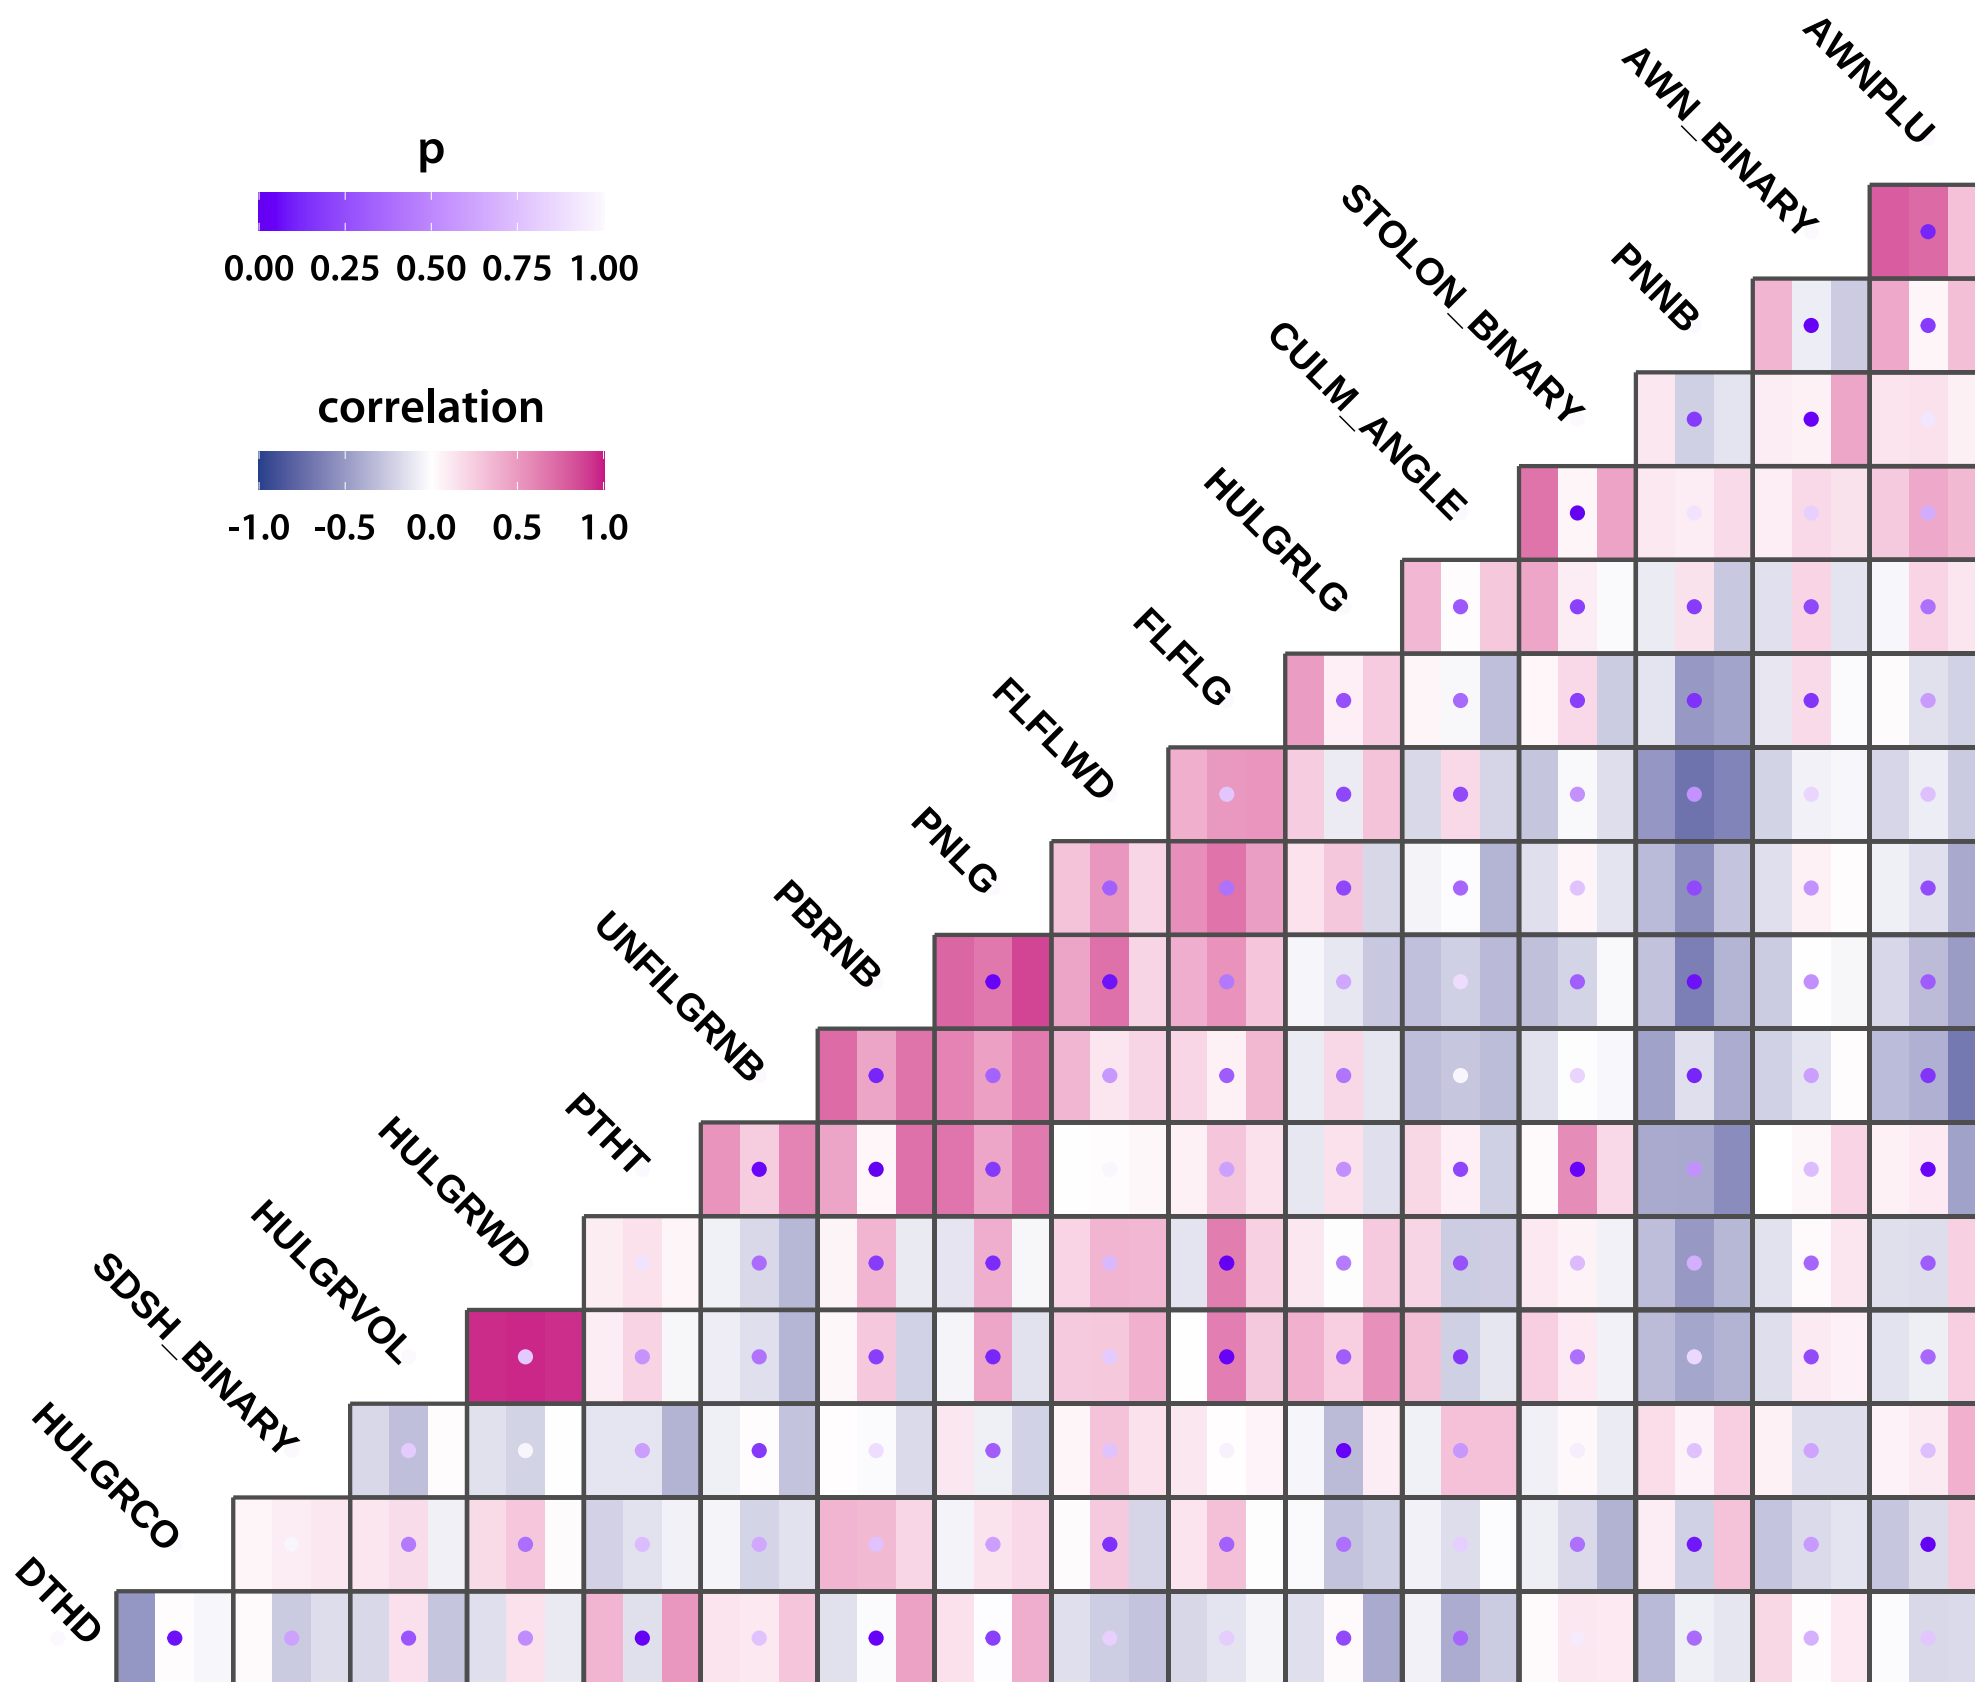

Supplement: Data_Sheet_1.ZIP [file traitCorDBp4.pdf › traitCorDBp4.pdf]

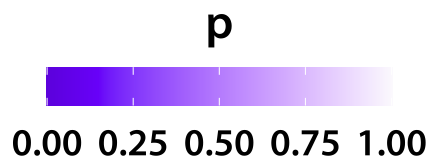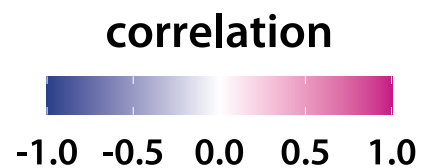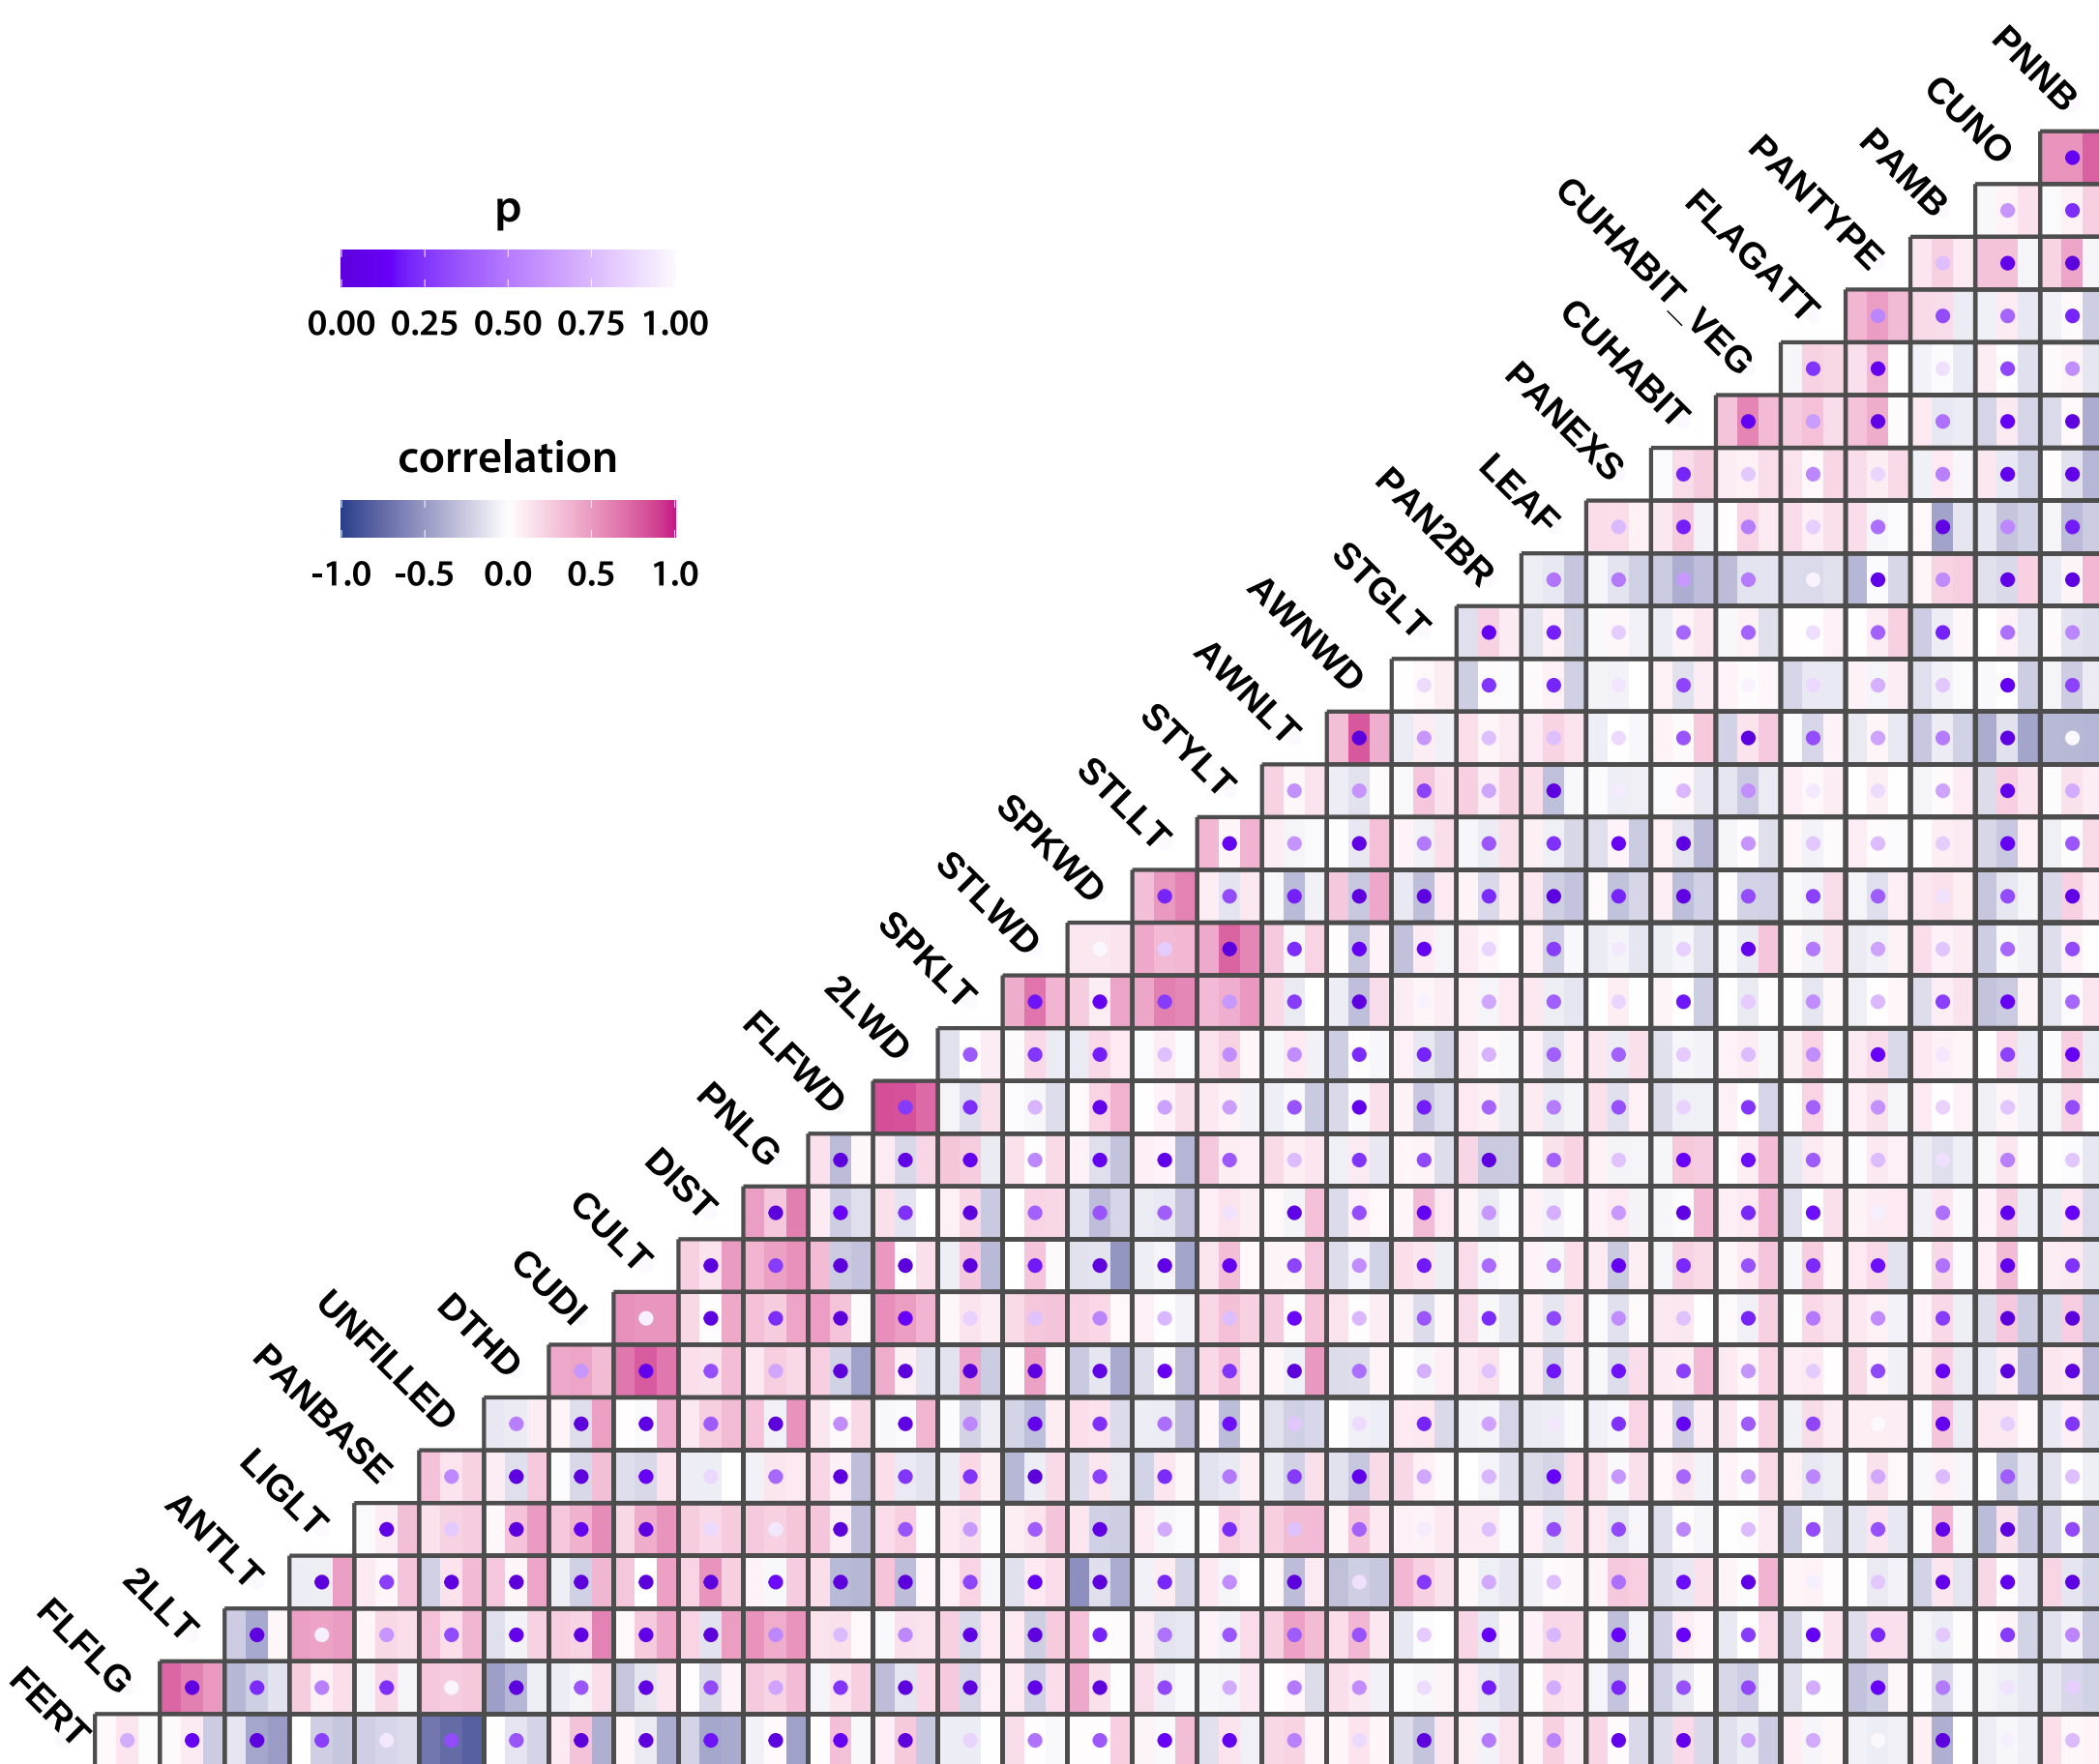

Supplement: Data_Sheet_1.ZIP [file traitCorIRRIp4.pdf › traitCorIRRIp4.pdf]

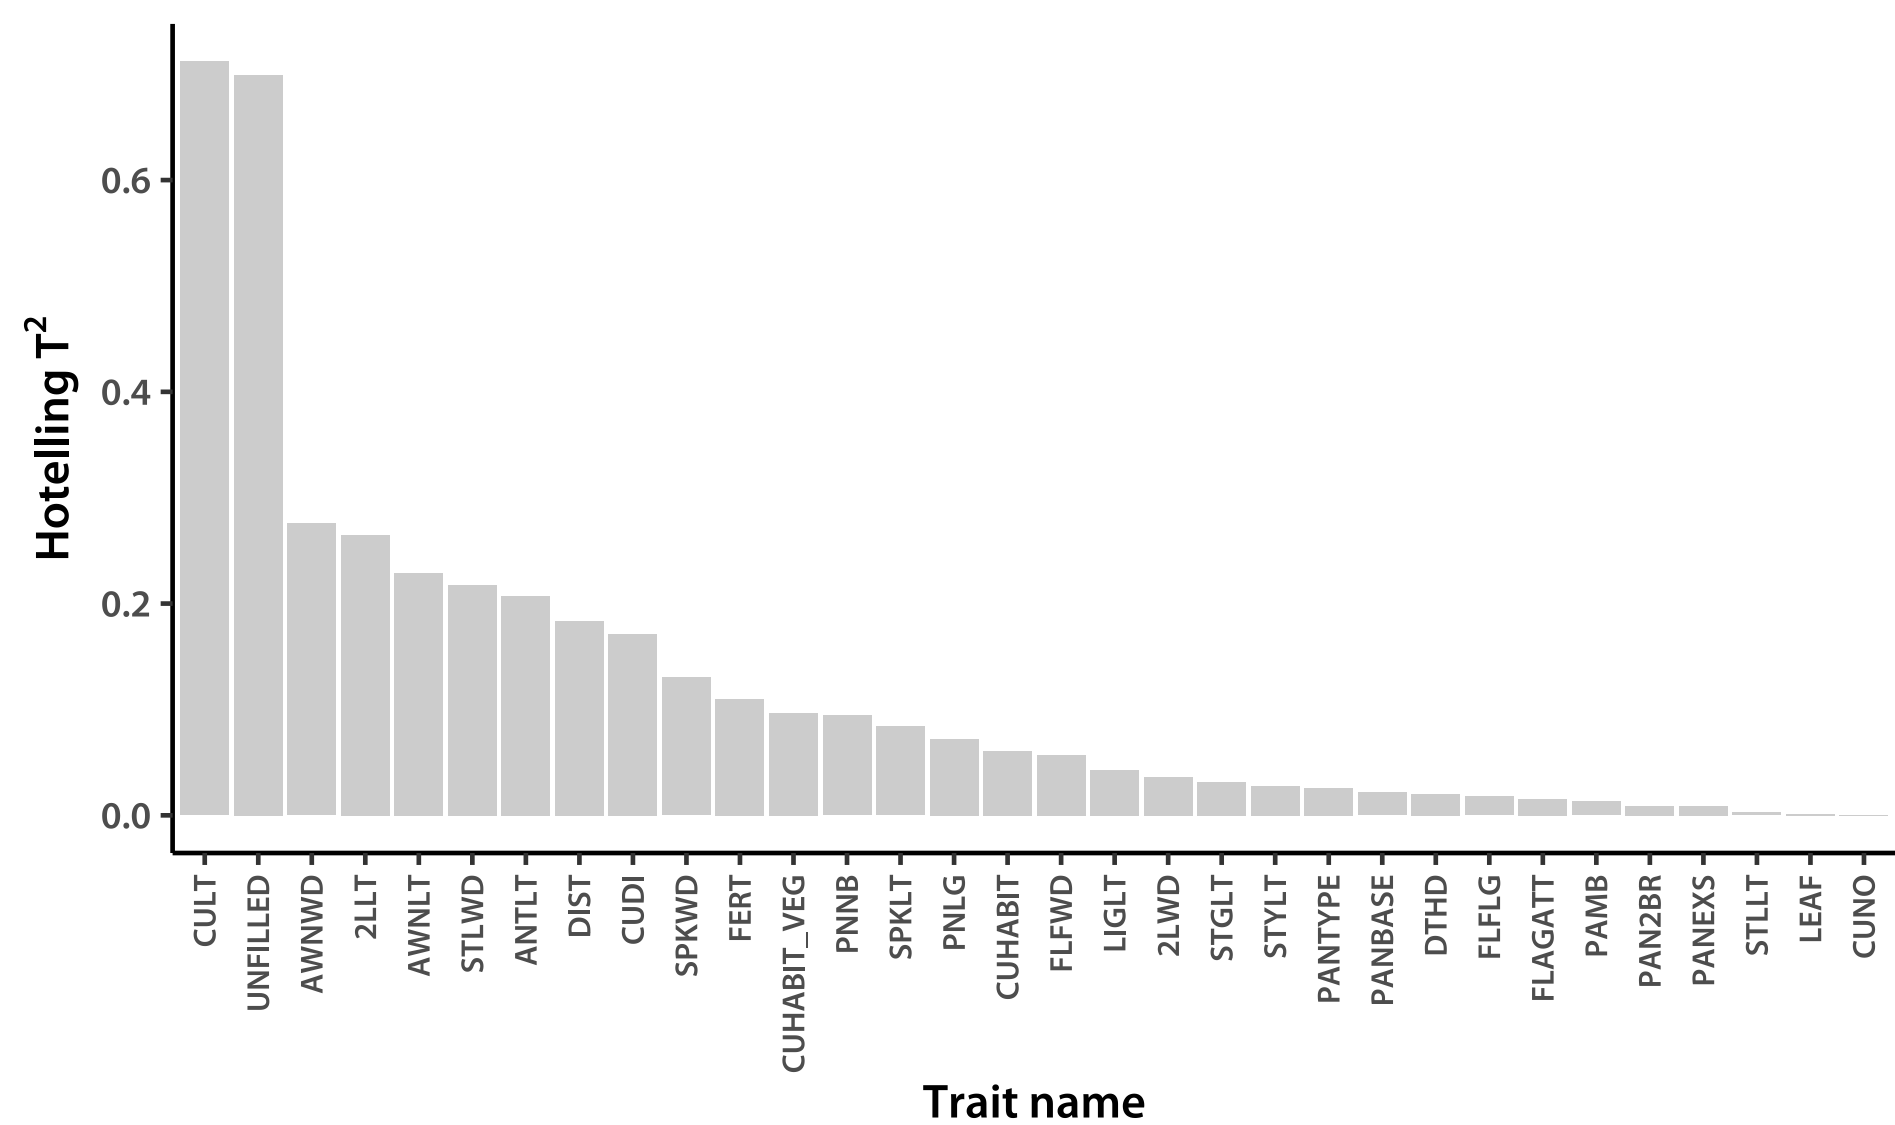

Supplement: Data_Sheet_1.ZIP [file traitMhlIRRI.pdf › traitMhlIRRI.pdf]

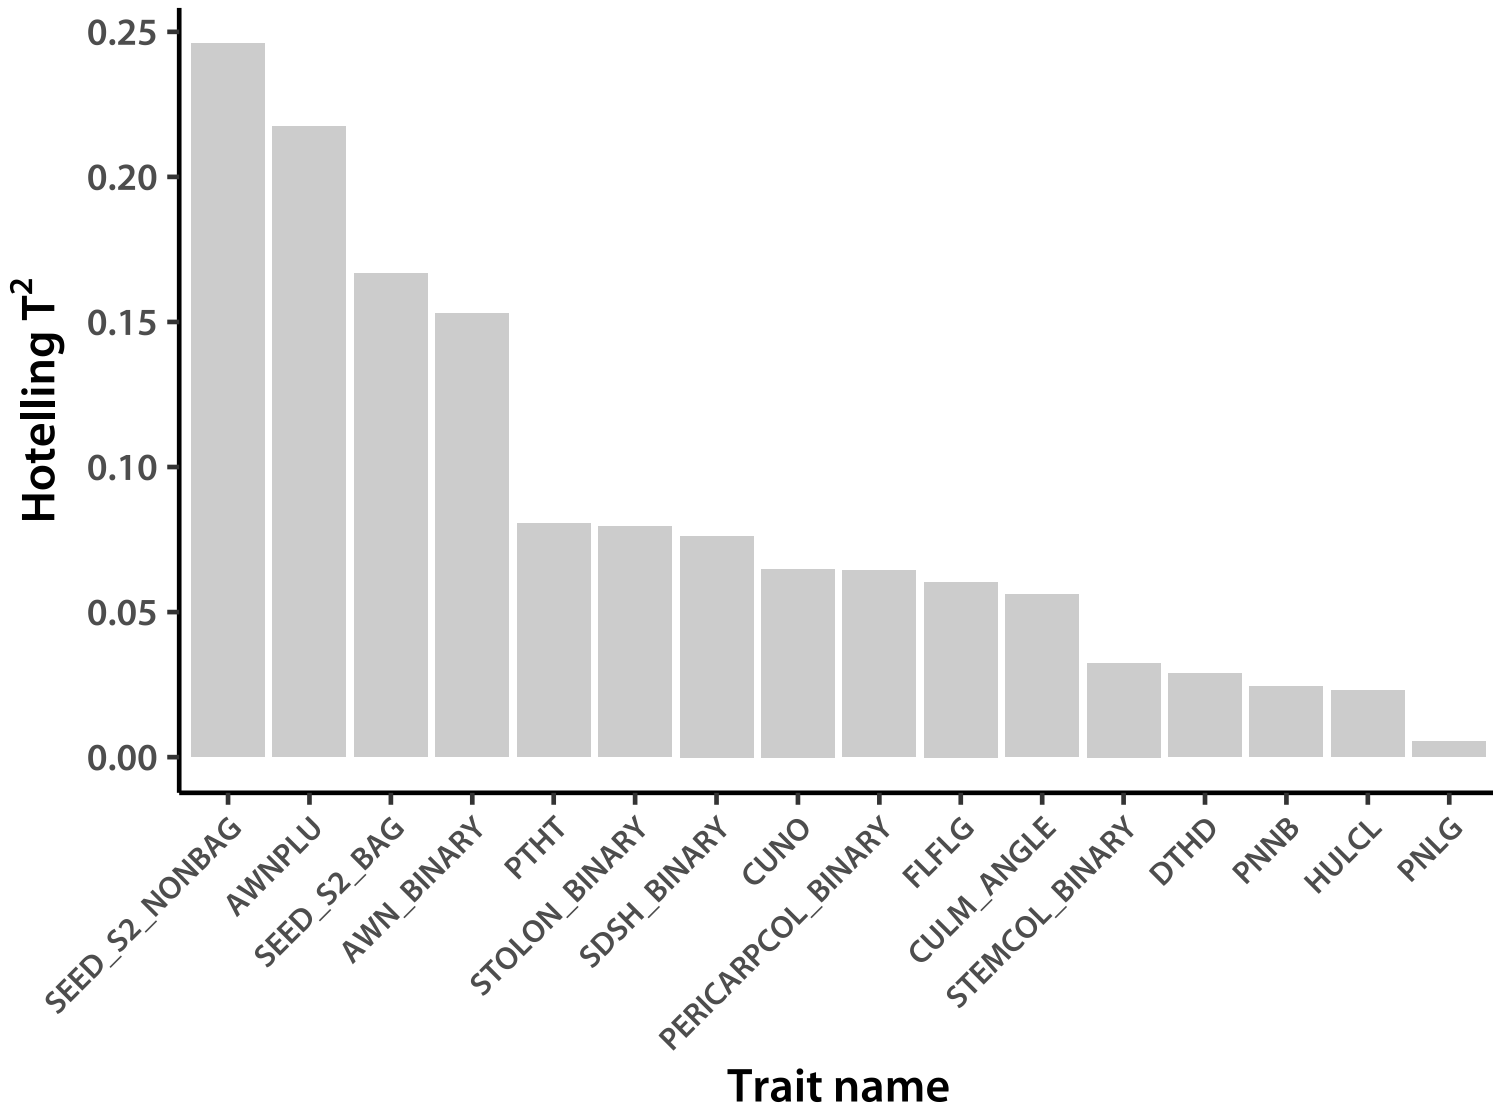

Supplement: Data_Sheet_1.ZIP [file traitMhlP4CU.pdf › traitMhlP4CU.pdf]

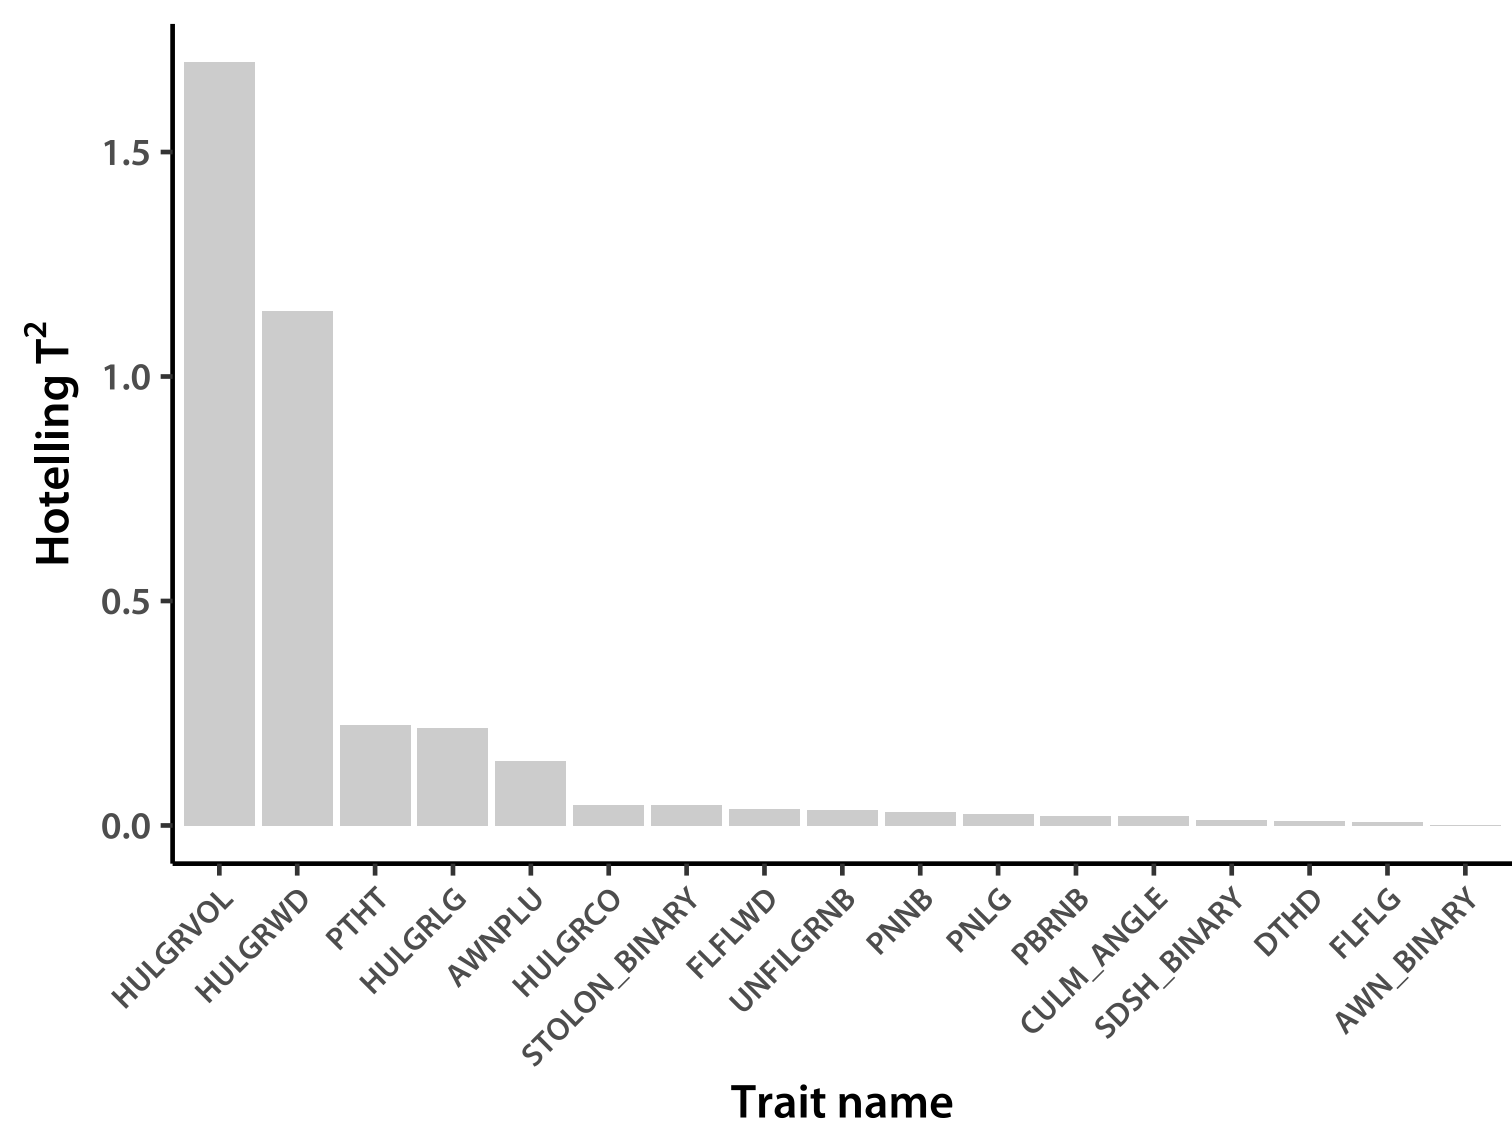

Supplement: Data_Sheet_1.ZIP [file traitMhlP4DB.pdf › traitMhlP4DB.pdf]

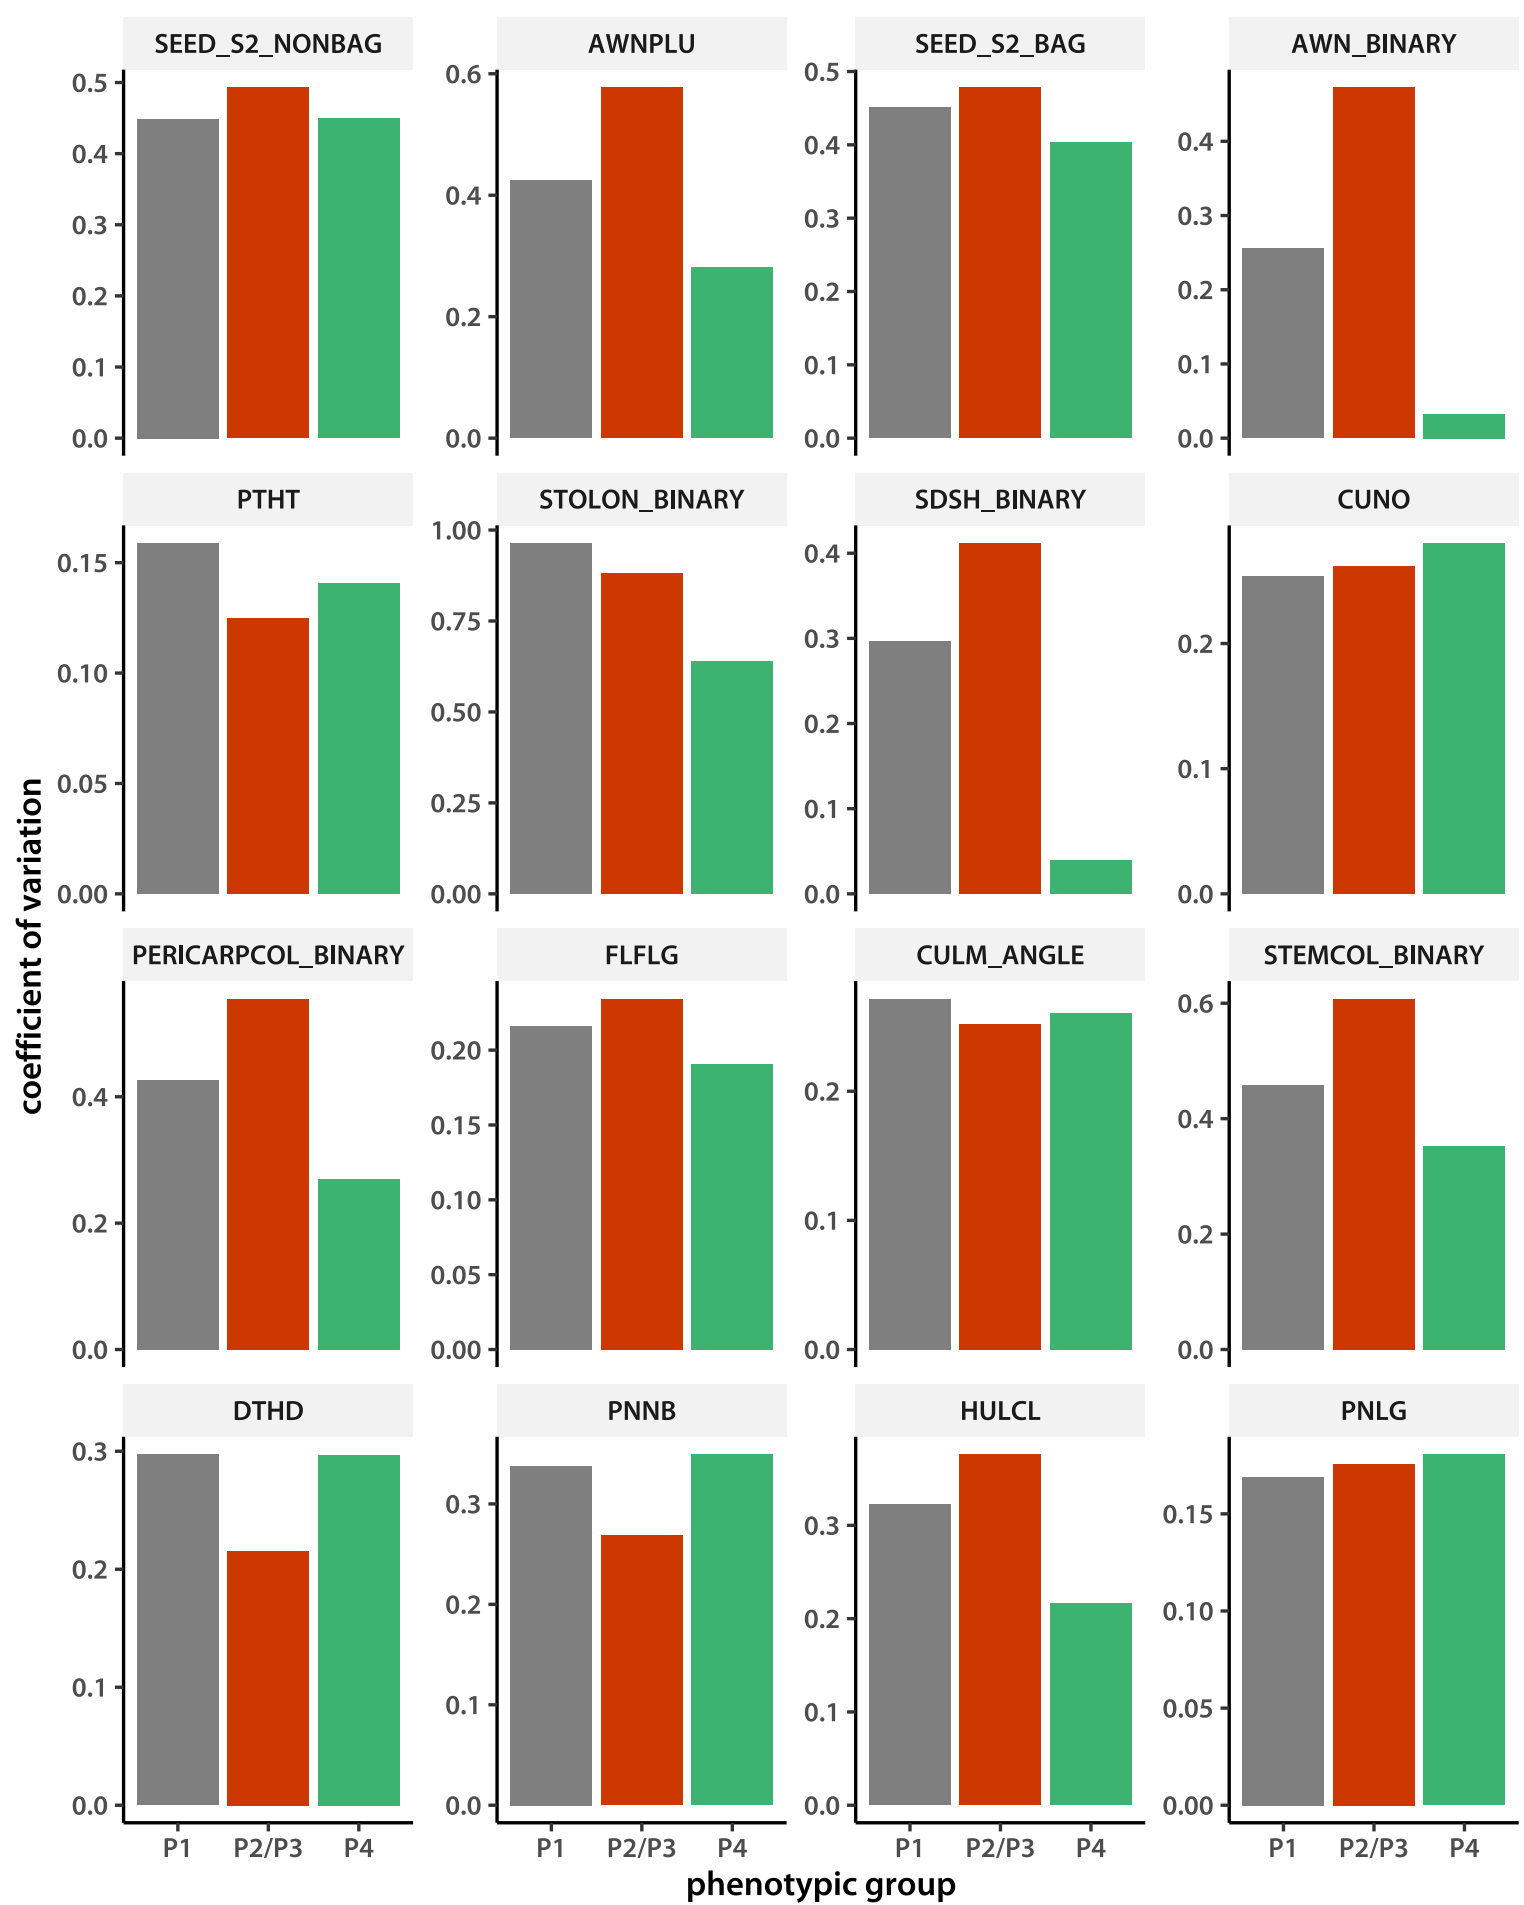

Supplement: Data_Sheet_1.ZIP [file traitSdCUbpP4.pdf › traitSdCUbpP4.pdf]

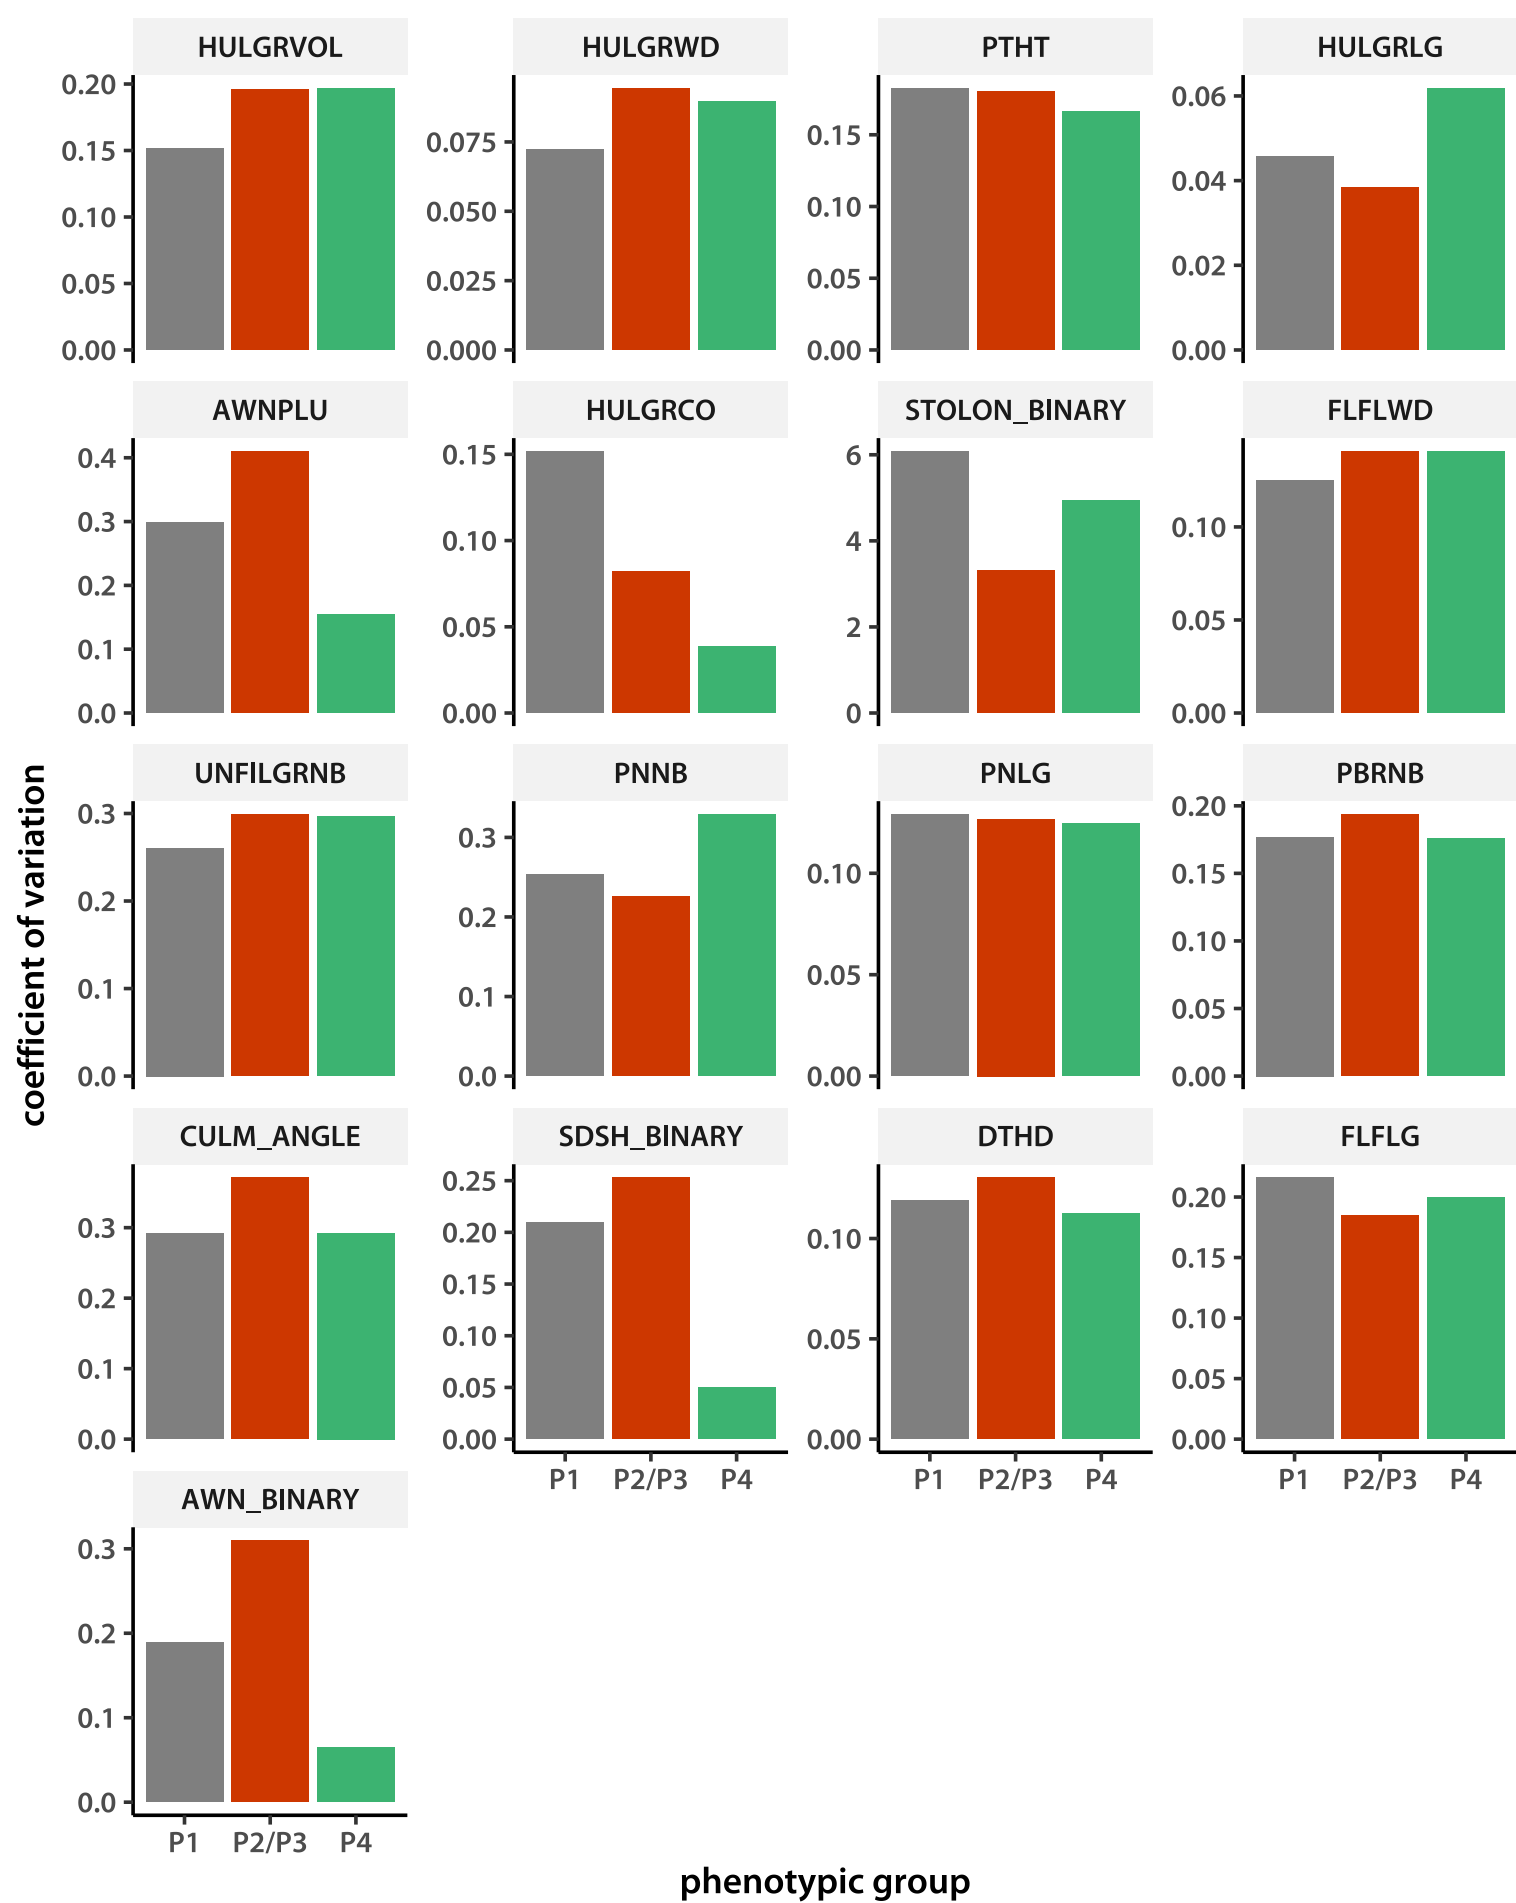

Supplement: Data_Sheet_1.ZIP [file traitSdDBbpP4.pdf › traitSdDBbpP4.pdf]

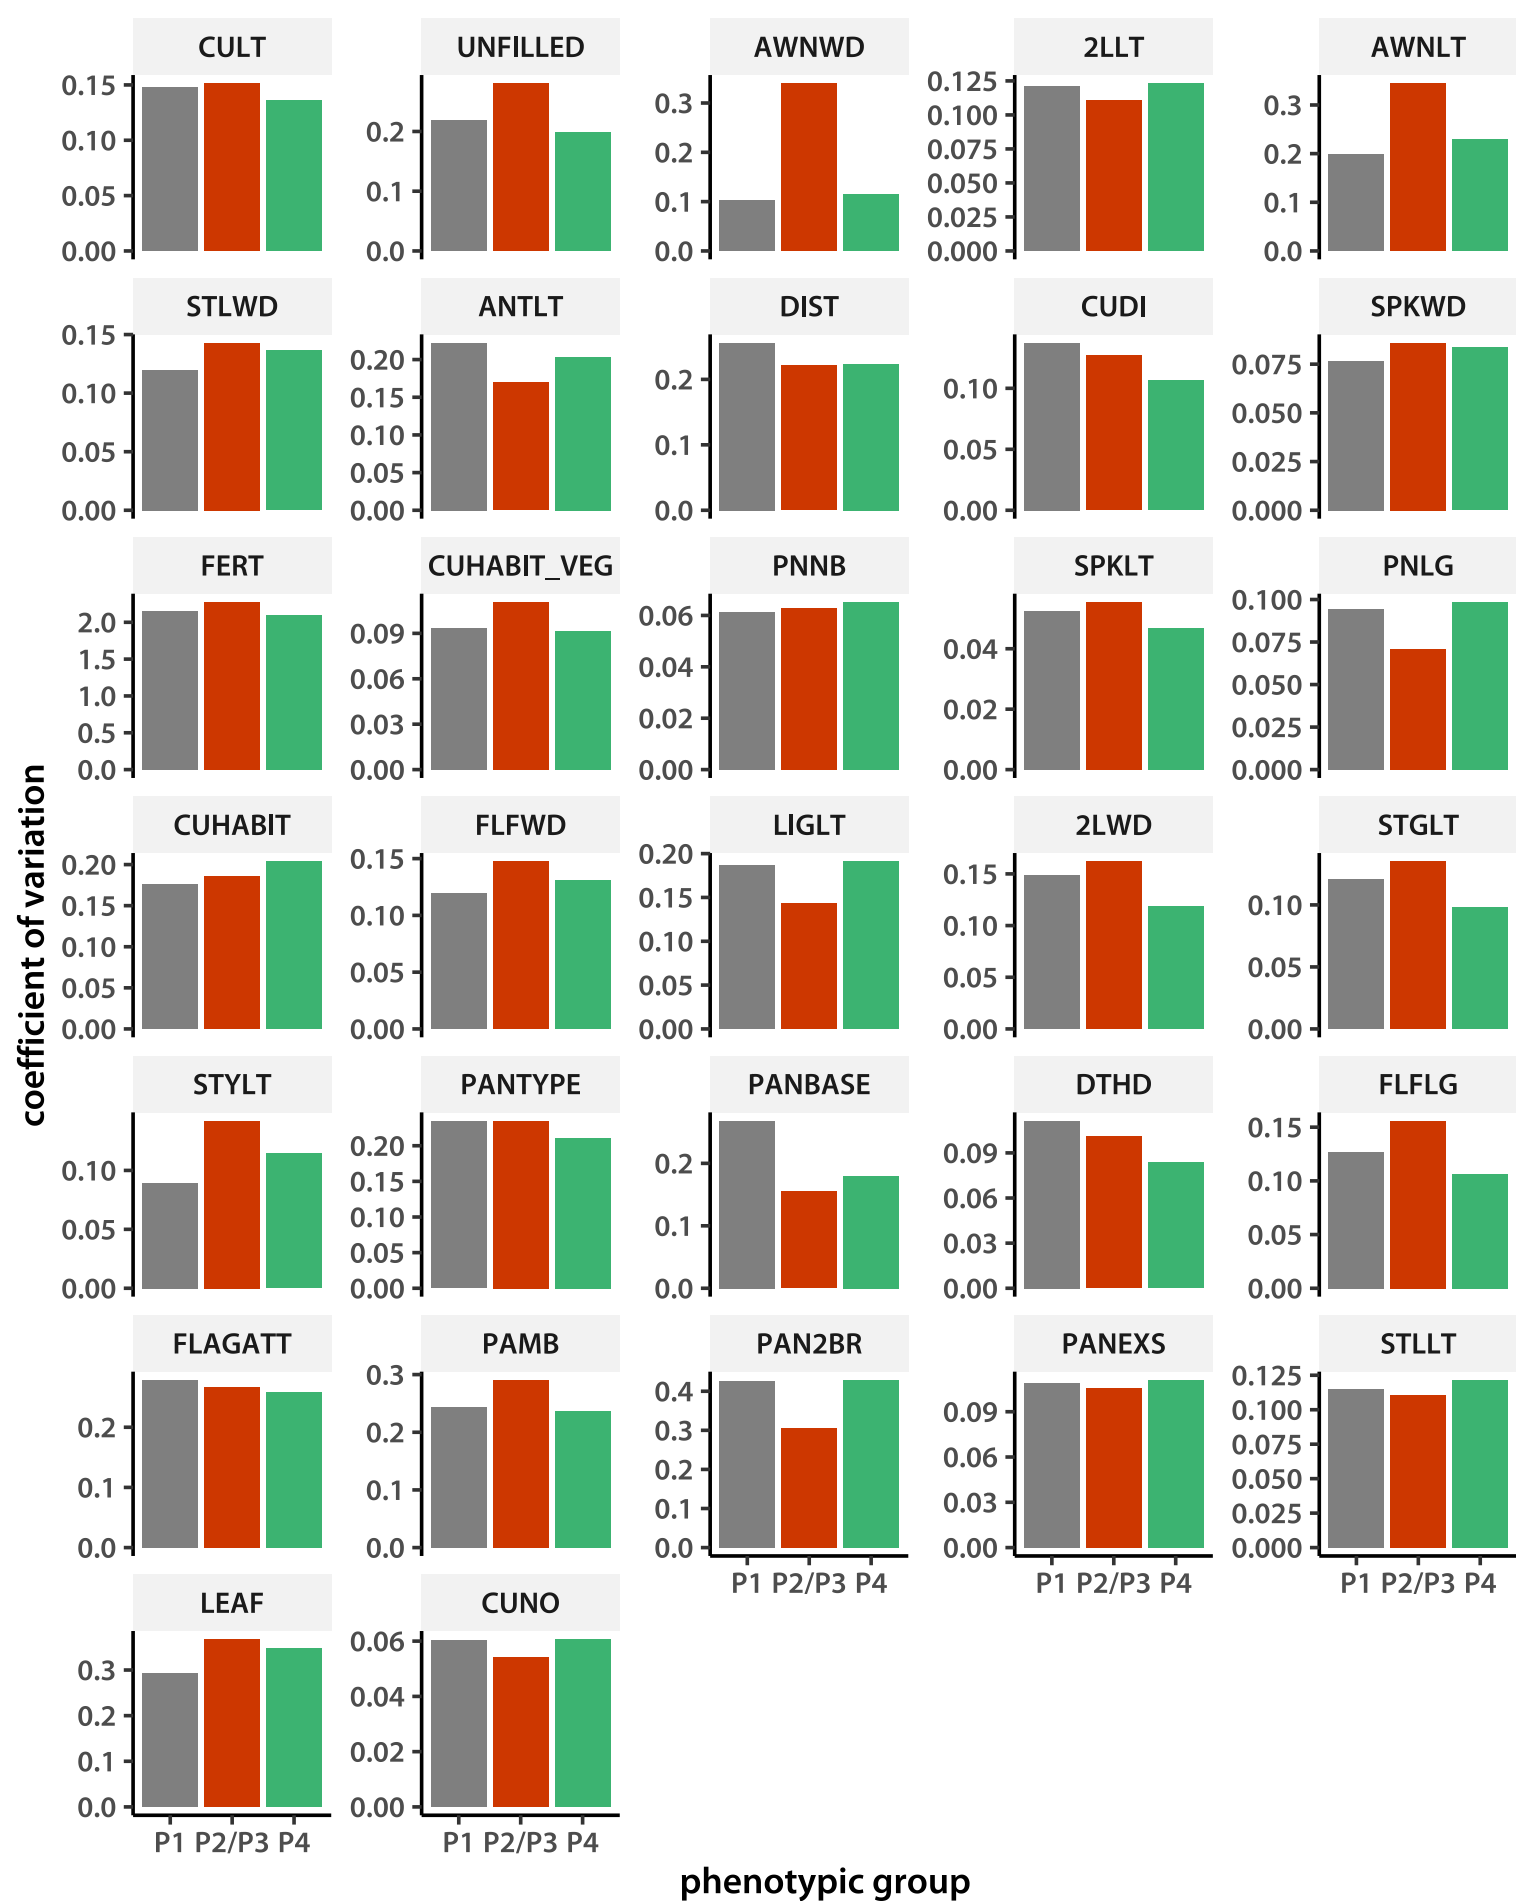

Supplement: Data_Sheet_1.ZIP [file traitSdIRRIbpP4.pdf › traitSdIRRIbpP4.pdf]

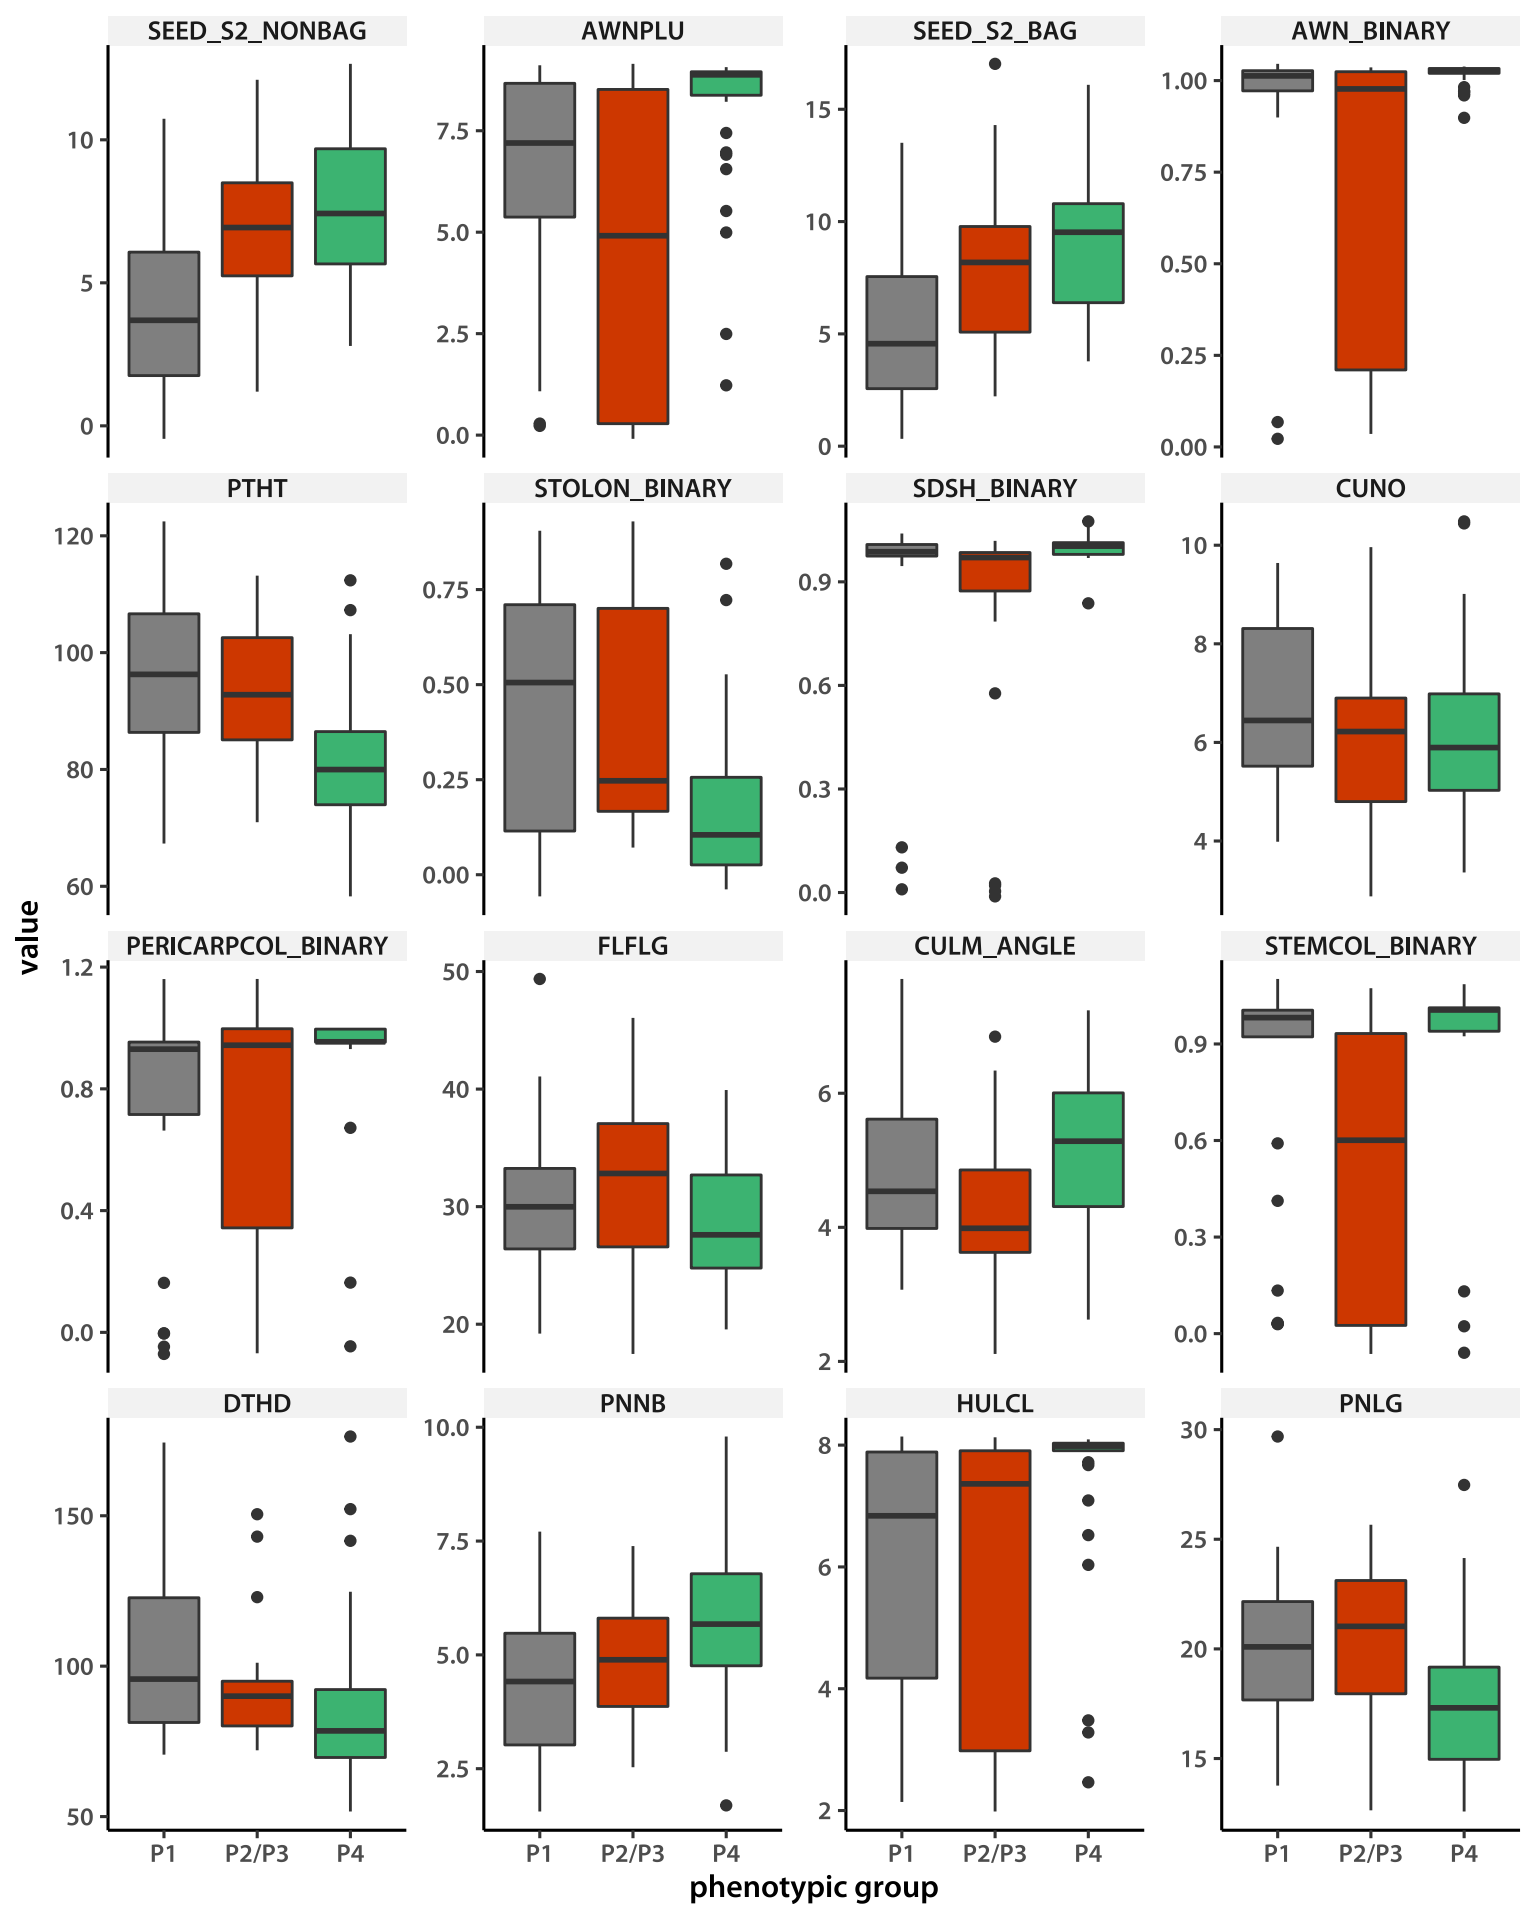

Supplement: Data_Sheet_1.ZIP [file traitsCUbxpP4.pdf › traitsCUbxpP4.pdf]

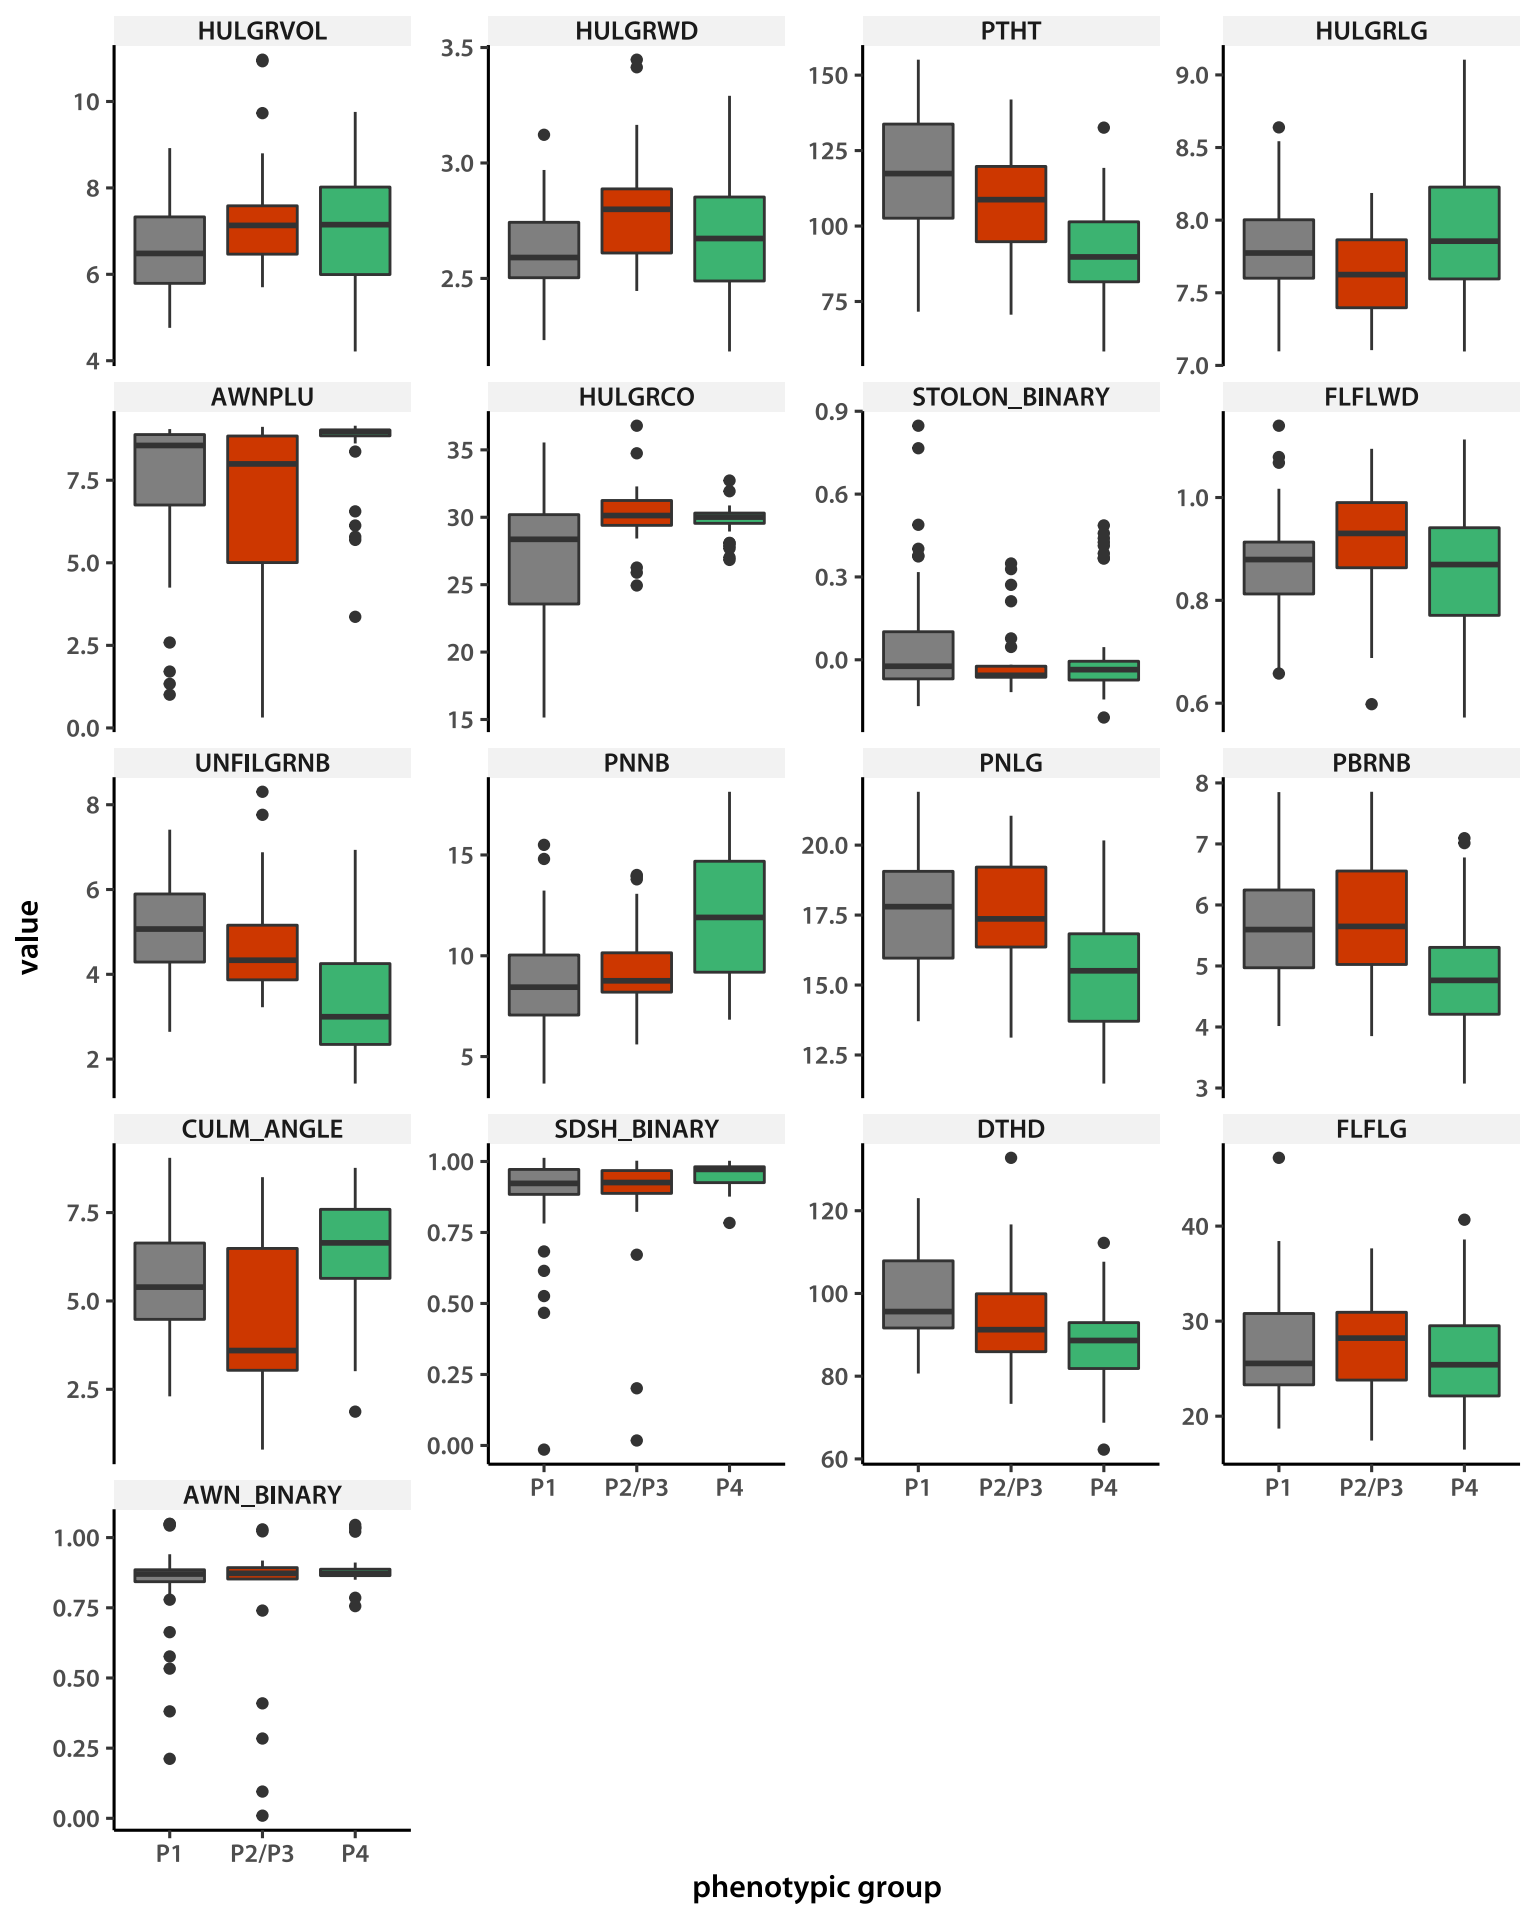

Supplement: Data_Sheet_1.ZIP [file traitsDBbxpP4.pdf › traitsDBbxpP4.pdf]

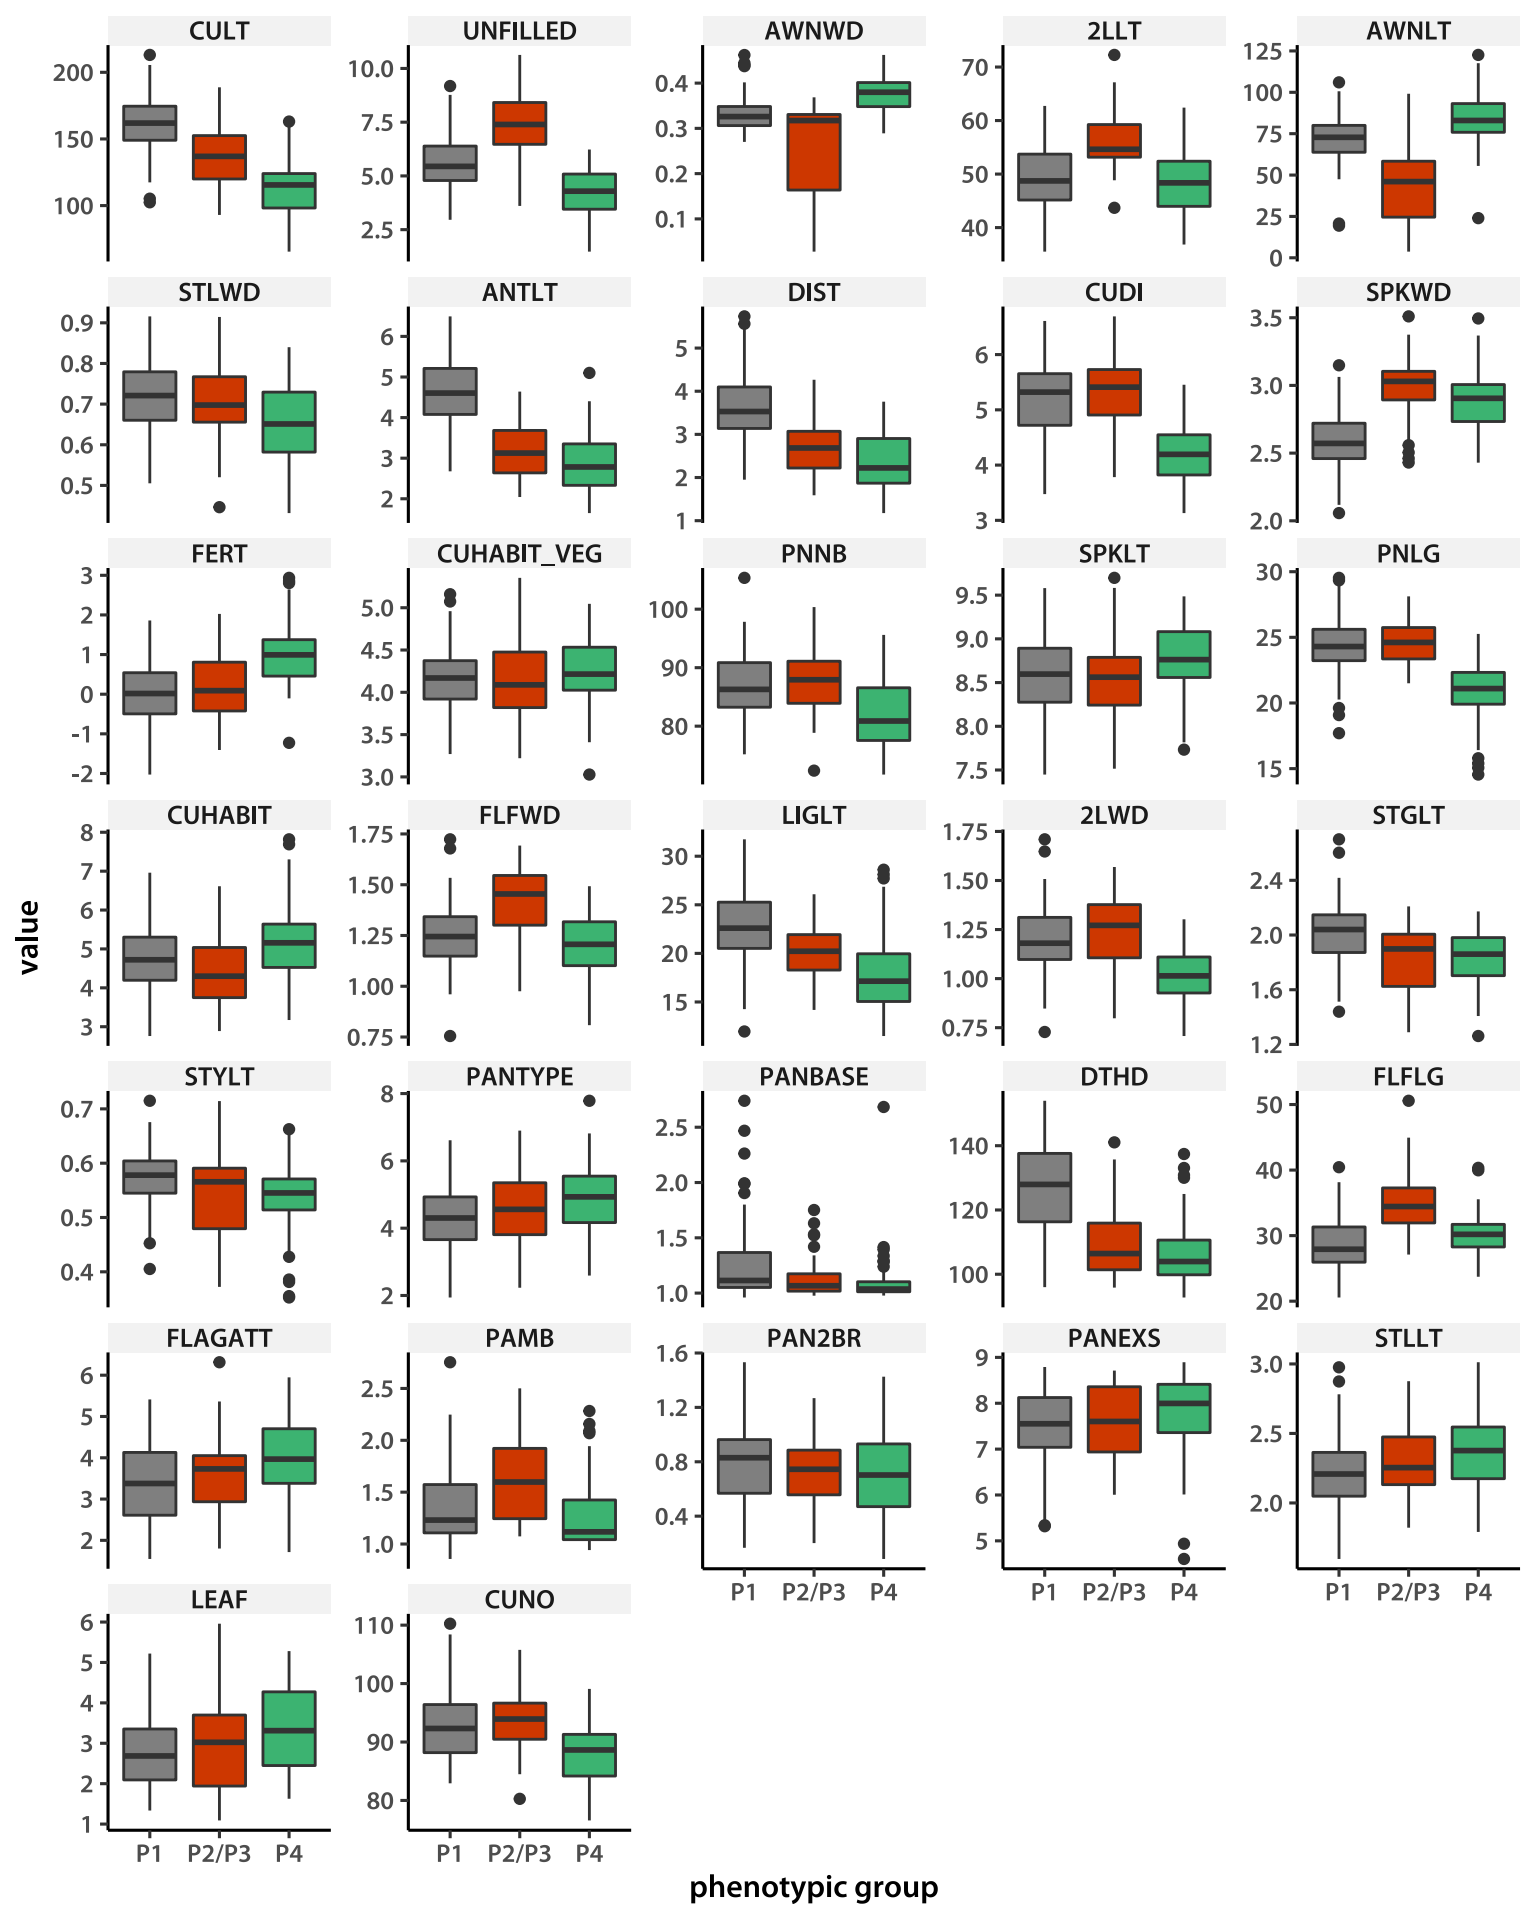

Supplement: Data_Sheet_1.ZIP [file traitsIRRIbxpP4.pdf › traitsIRRIbxpP4.pdf]

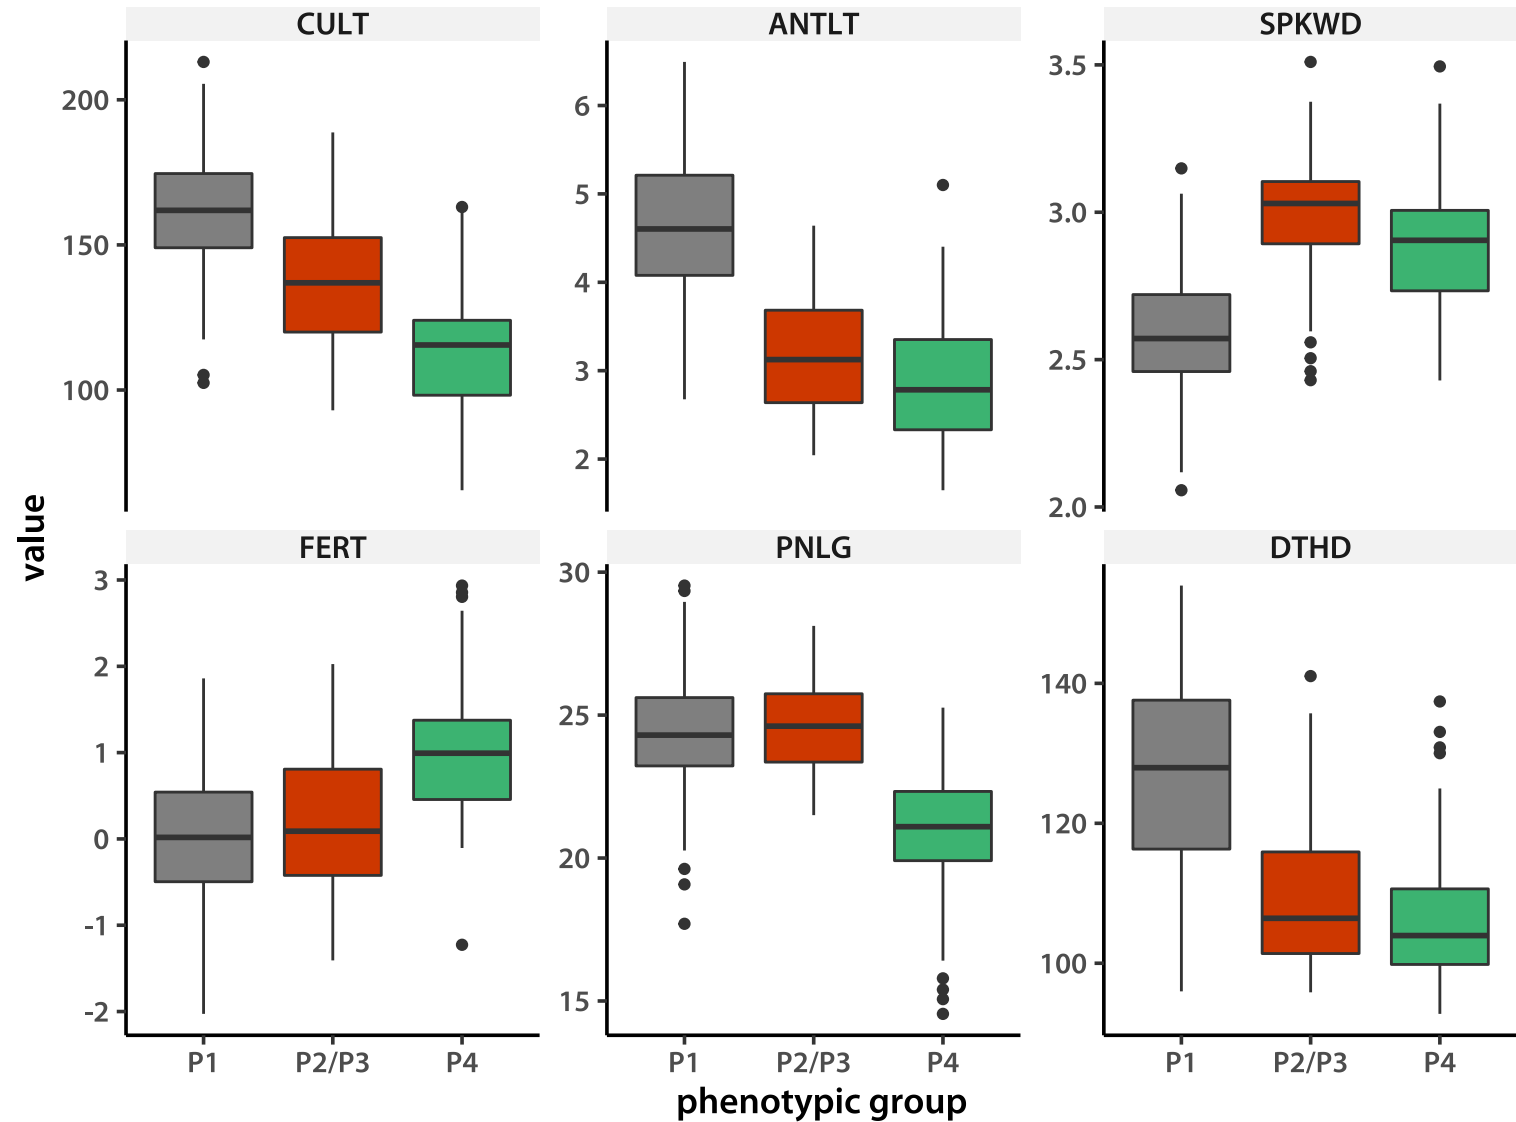

Supplement: Data_Sheet_1.ZIP [file traitsIRRIbxpP4sixTr.pdf › traitsIRRIbxpP4sixTr.pdf]
